# Supplementary material for: Population genomics of postglacial western eurasia
Source: bioRxiv or medRxiv preprint supplement (doi:10.1101/2022.05.04.490594), 2023-12-21
Supplement: Supplementary file [file media-1.pdf]

1           Population Genomics of Stone Age  
2                           Eurasia:  
3       **Supplementary Information (Part 1)**

|    |                                                                 |    |
|----|-----------------------------------------------------------------|----|
| 5  | <b>1) Data Generation and Authentication</b>                    | 7  |
| 6  | Sampling, lab work and sequencing                               | 7  |
| 7  | Basic bioinformatics                                            | 8  |
| 8  | DNA authentication                                              | 9  |
| 9  | DNA contamination - results and implications                    | 10 |
| 10 | References                                                      | 11 |
| 11 | <b>2) Imputation of ancient DNA</b>                             | 14 |
| 12 | Introduction                                                    | 14 |
| 13 | Methods                                                         | 14 |
| 14 | Results                                                         | 15 |
| 15 | Effects of Low coverage                                         | 17 |
| 16 | References                                                      | 29 |
| 17 | <b>3) Demographic inference</b>                                 | 31 |
| 18 | 3a) Phylogenetic analysis of mtDNA sequences                    | 31 |
| 19 | Methods                                                         | 31 |
| 20 | Results                                                         | 31 |
| 21 | Conclusion                                                      | 32 |
| 22 | References                                                      | 35 |
| 23 | 3b) Y chromosome / Sex determination                            | 35 |
| 24 | Methods                                                         | 35 |
| 25 | Results                                                         | 36 |
| 26 | Sex determination                                               | 36 |
| 27 | Phylogenetic placement                                          | 37 |
| 28 | Sub-haplogroup analyses of newly reported samples               | 38 |
| 29 | References                                                      | 45 |
| 30 | 3c) Relatedness                                                 | 45 |
| 31 | Methods                                                         | 46 |
| 32 | Results                                                         | 46 |
| 33 | References                                                      | 49 |
| 34 | 3d) Pop structure general, PCA/Admixture (Martin)               | 49 |
| 35 | Methods                                                         | 49 |
| 36 | Results                                                         | 52 |
| 37 | Comparison of imputed and pseudo-haploid genotypes in PCA space | 52 |
| 38 | PCA position of samples flagged as contaminated                 | 56 |
| 39 | Genetic ancestry of newly reported samples                      | 57 |

|    |                                                                                            |     |
|----|--------------------------------------------------------------------------------------------|-----|
| 40 | References                                                                                 | 64  |
| 41 | 3e) Inferring the spatiotemporal spread of population movements in the past 13 millennia   |     |
| 42 |                                                                                            | 65  |
| 43 | Introduction                                                                               | 65  |
| 44 | Methods                                                                                    | 65  |
| 45 | Results                                                                                    | 65  |
| 46 | Figures                                                                                    | 67  |
| 47 | References                                                                                 | 71  |
| 48 | 3f) HBD/ IBD sharing/ROH/clustering                                                        | 73  |
| 49 | Methods                                                                                    | 73  |
| 50 | Results                                                                                    | 74  |
| 51 | IBD-based hierarchical graph clustering                                                    | 74  |
| 52 | Runs of homozygosity and IBD sharing within clusters                                       | 104 |
| 53 | Mixture models                                                                             | 107 |
| 54 | References                                                                                 | 113 |
| 55 | 3g) Selecting non-British individuals from the UK Biobank                                  | 114 |
| 56 | Introduction                                                                               | 114 |
| 57 | Methods                                                                                    | 114 |
| 58 | Results                                                                                    | 115 |
| 59 | Discussion                                                                                 | 115 |
| 60 | References                                                                                 | 121 |
| 61 | 3h) Painting the UK BioBank                                                                | 121 |
| 62 | Introduction                                                                               | 121 |
| 63 | Methods                                                                                    | 121 |
| 64 | Painting pipeline introduction                                                             | 121 |
| 65 | Reference/donor panel formation                                                            | 122 |
| 66 | Target/recipient panel formation                                                           | 122 |
| 67 | SNP selection and merging of the panels                                                    | 123 |
| 68 | Painting process                                                                           | 123 |
| 69 | Painting at biobank scale                                                                  | 124 |
| 70 | Results                                                                                    | 125 |
| 71 | Ancestry-PCs relationship                                                                  | 125 |
| 72 | Ancestry-geographic variation                                                              | 125 |
| 73 | Discussion                                                                                 | 127 |
| 74 | Figures                                                                                    | 128 |
| 75 | References                                                                                 | 145 |
| 76 | 3i) Building a population history model of Europeans and using it to assign local ancestry |     |
| 77 | to all haplotypes in modern and ancient European samples                                   | 147 |
| 78 | Introduction                                                                               | 147 |
| 79 | Method and Results                                                                         | 147 |
| 80 | Model of population structure                                                              | 147 |
| 81 | Local Ancestry Using Tree Sequences:                                                       | 148 |
| 82 | Figures:                                                                                   | 151 |
| 83 | References                                                                                 | 153 |

|     |                                                                           |     |
|-----|---------------------------------------------------------------------------|-----|
| 84  | <b>4) Natural selection and trait evolution</b>                           | 155 |
| 85  | 4a) Estimating allele frequency trajectories of trait-associated variants | 155 |
| 86  | Introduction                                                              | 155 |
| 87  | Methods                                                                   | 156 |
| 88  | SNP Ascertainment                                                         | 156 |
| 89  | GWAS SNPs                                                                 | 156 |
| 90  | Control SNPs                                                              | 156 |
| 91  | Simulated Neutral SNPs                                                    | 156 |
| 92  | 1000G ARG                                                                 | 157 |
| 93  | Data pre-processing                                                       | 157 |
| 94  | ARG Inference                                                             | 157 |
| 95  | Modifications to CLUES                                                    | 157 |
| 96  | ARG sampling using Relate                                                 | 157 |
| 97  | Ancient DNA samples                                                       | 158 |
| 98  | Selection Analysis                                                        | 158 |
| 99  | CLUES with Modern 1000G data                                              | 158 |
| 100 | CLUES with aDNA Time Series                                               | 158 |
| 101 | CLUES with aDNA Ancestral Paintings                                       | 159 |
| 102 | Reference and mapping bias filters                                        | 159 |
| 103 | Genome-wide selection                                                     | 160 |
| 104 | Results                                                                   | 162 |
| 105 | Selection in 1000G EUR                                                    | 162 |
| 106 | Selection in aDNA Time Series                                             | 163 |
| 107 | Peak 1: LINC02797, AL583808.1                                             | 165 |
| 108 | Peak 2: MCM6                                                              | 166 |
| 109 | Peak 3: PTH1R - AC109583.3                                                | 167 |
| 110 | Peak 4: KLF3 - RNA5SP158                                                  | 168 |
| 111 | Peak 5: P4HA2, SLC22A4                                                    | 169 |
| 112 | Peak 6: FLT4                                                              | 170 |
| 113 | Peak 7: HLA-A - HLA-W                                                     | 171 |
| 114 | Peak 8: FADS2                                                             | 172 |
| 115 | Peak 9: HECTD4                                                            | 173 |
| 116 | Peak 10: AC092143.1, MC1R                                                 | 174 |
| 117 | Peak 11: MAPT                                                             | 175 |
| 118 | Selection in simulations with Ancestral Paintings                         | 176 |
| 119 | Selection in aDNA with Ancestral Paintings                                | 178 |
| 120 | Peak 1: AL591122.1                                                        | 180 |
| 121 | Peak 2: NEGR1                                                             | 181 |
| 122 | Peak 3: MCM6                                                              | 182 |
| 123 | Peak 4: CACNA2D2                                                          | 183 |
| 124 | Peak 5: KLF3-AS1                                                          | 184 |
| 125 | Peak 6: BANK1                                                             | 185 |
| 126 | Peak 7: SLC45A2                                                           | 186 |
| 127 | Peak 8: SLC22A4                                                           | 187 |

|     |                                                                                        |     |
|-----|----------------------------------------------------------------------------------------|-----|
| 128 | Peak 9: GRK6                                                                           | 188 |
| 129 | Peak 10: HLA                                                                           | 189 |
| 130 | Peak 11: MSRA                                                                          | 190 |
| 131 | Peak 12: ABO                                                                           | 191 |
| 132 | Peak 13: MYBPC3                                                                        | 192 |
| 133 | Peak 14: FADS2                                                                         | 193 |
| 134 | Peak 15: HECTD4                                                                        | 194 |
| 135 | Peak 16: RFLNA                                                                         | 195 |
| 136 | Peak 17: MARK3                                                                         | 196 |
| 137 | Peak 18: SEMA6D                                                                        | 197 |
| 138 | Peak 19: CSK                                                                           | 198 |
| 139 | Peak 20: DPEP1                                                                         | 199 |
| 140 | Peak 21: MAPT                                                                          | 200 |
| 141 | Discussion                                                                             | 201 |
| 142 | Pan-ancestry selection                                                                 | 201 |
| 143 | Ancestry stratified selection trajectories                                             | 203 |
| 144 | References                                                                             | 204 |
| 145 | 4b) Detangling Direct and Indirect impacts of sample age from the Mesolithic-Neolithic |     |
| 146 | data on genotype imputation                                                            | 221 |
| 147 | References                                                                             | 225 |
| 148 | 4c) Over-dispersion in polygenic scores across ancient populations                     | 225 |
| 149 | Introduction                                                                           | 226 |
| 150 | Methods                                                                                | 226 |
| 151 | Results                                                                                | 228 |
| 152 | Polygenic scores across ancient populations                                            | 228 |
| 153 | Individual scores across time and space                                                | 228 |
| 154 | Differentiation among ancient populations and GBR                                      | 228 |
| 155 | Discussion                                                                             | 229 |
| 156 | Figures                                                                                | 232 |
| 157 | References                                                                             | 242 |
| 158 | 4d) Identifying candidates for positive selection using patterns of ancient population |     |
| 159 | differentiation                                                                        | 244 |
| 160 | Introduction                                                                           | 244 |
| 161 | Methods                                                                                | 244 |
| 162 | Results                                                                                | 245 |
| 163 | Eurasian scan                                                                          | 245 |
| 164 | West Eurasian scan                                                                     | 246 |
| 165 | Neolithic vs. hunter-gatherer scan                                                     | 248 |
| 166 | Figures                                                                                | 250 |
| 167 | References                                                                             | 310 |
| 168 | 4e) Correlation between components of variation in population structure and components |     |
| 169 | of variation in SNP-trait association                                                  | 320 |
| 170 | Introduction                                                                           | 321 |
| 171 | Methods                                                                                | 321 |
| 172 | Results                                                                                | 322 |

|     |                                                                                           |     |
|-----|-------------------------------------------------------------------------------------------|-----|
| 173 | Discussion                                                                                | 323 |
| 174 | Figures                                                                                   | 324 |
| 175 | References                                                                                | 336 |
| 176 | 4f) Polygenic prediction for height, eye colour and hair colour in ancient Danish samples |     |
| 177 |                                                                                           | 336 |
| 178 | References                                                                                | 342 |
| 179 | 4g) Calling chr17q21.31 KANSL1 Duplications in Ancient Genomes                            | 343 |
| 180 | 4h) Calculating ancestral contributions to modern complex phenotypes                      | 345 |
| 181 | Introduction                                                                              | 345 |
| 182 | Methods                                                                                   | 346 |
| 183 | Results                                                                                   | 347 |
| 184 | Discussion                                                                                | 349 |
| 185 | Figures/tables                                                                            | 350 |
| 186 | References                                                                                | 352 |
| 187 | 4i) Pathogenic structural variants in ancient vs. modern-day humans                       | 355 |
| 188 | References                                                                                | 378 |
| 189 |                                                                                           |     |
| 190 |                                                                                           |     |
| 191 |                                                                                           |     |
| 192 |                                                                                           |     |
| 193 |                                                                                           |     |

194 Key to Supplementary Data Tables

| No.                       | Title                                                                       |
|---------------------------|-----------------------------------------------------------------------------|
| Supplementary Table I.    | Basic overview of samples and genetic data                                  |
| Supplementary Table II.   | Samples, dates and isotopic data                                            |
| Supplementary Table III.  | Reservoir correction calculations for radiocarbon dates                     |
| Supplementary Table IV.   | Full sample metadata (dates and isotopic data non-cleaned and non-combined) |
| Supplementary Table V.    | DNA contamination estimation                                                |
| Supplementary Table VI.   | Relatedness Estimates                                                       |
| Supplementary Table VII.  | Ancient Genomes dataset (incl. all imputed)                                 |
| Supplementary Table VIII. | IBD mixture model sets                                                      |
| Supplementary Table IX.   | IBD Ancestry proportions for set "deep"                                     |
| Supplementary Table X.    | IBD Ancestry proportions for set "postNeol"                                 |
| Supplementary Table XI.   | IBD Ancestry proportions for set "postBA"                                   |
| Supplementary Table XII.  | IBD Ancestry proportions for set "hgEur"                                    |
| Supplementary Table XIII. | IBD Ancestry proportions for set "fEur"                                     |
| Supplementary Table XIV.  | IBD Ancestry proportions for set "postNeolScand"                            |
| Supplementary Table XV.   | CLUES modern                                                                |
| Supplementary Table XVI.  | CLUES ancient                                                               |

195

196

197

# 1) Data Generation and Authentication

198

199

200 Morten E. Allentoft<sup>1,2</sup>, Simon Rasmussen<sup>3</sup>, Gabriel Renaud<sup>4</sup>, Abigail D. Ramsøe<sup>2</sup>, Thorfinn

201

Korneliusson<sup>2</sup>, Martin Sikora<sup>2</sup>

202

203 <sup>1</sup>Trace and Environmental DNA (TrEnD) Lab, Curtin University, Perth, Australia

204 <sup>2</sup>Lundbeck Foundation GeoGenetics Centre, GLOBE Institute, University of Copenhagen,

205

Copenhagen, Denmark

206

<sup>3</sup>Novo Nordisk Foundation Center for Protein Research, University of Copenhagen,

207

Copenhagen, Denmark

208

<sup>4</sup>Department of Health Technology, Section of Bioinformatics, Technical University of

209

Denmark, Kongens Lyngby, Denmark

## 210 Sampling, lab work and sequencing

211 The lab work component of this project followed the same procedures outlined in Allentoft et

212 al. <sup>1</sup> and Damgaard et al. <sup>2</sup>, also including sampling of the petrous part of the temporal bone

213 following the discovery of exceptional DNA preservation in these bones <sup>3,4</sup>. While new

214 ancient DNA (aDNA) extraction and library methods are continually optimised and presented

215 in the literature, we prioritised method consistency throughout the project period to avoid the

216 risk of introducing batch effects in the data.

217

218 A total of 962 Stone Age and early Bronze Age human skeletons from across Eurasia were

219 sampled for this project. An initial molecular 'screening' to assess the endogenous DNA

220 content (proportion of DNA sequences identified as human) was performed by shallow

221 shotgun sequencing resulting in 317 samples (**Supplementary Table I**) being selected for

222 deeper sequencing. We applied a threshold of <1% endogenous DNA for rejecting samples

223 in the project, except for a few Danish skeletons that were prioritised despite displaying even

224 lower contents. Of the 317 samples, 211 were teeth, 91 were petrous bones, and 15 were

225 pieces of other types of bones (long bones, ribs, cranial bones).

226

227 Following some AMS-dates which were conducted late in the project, two of the 317 samples

228 (NEO901 and NEO902, **Supplementary Table I**) proved too young to be relevant for this

229 project. These two samples have only been included for imputation purposes together with

230 the data that are released as part of this project, but they have not been included in

231 downstream analyses. Hence the final number of new samples that were sequenced,

232 analysed and discussed as part of this project is 315, and this is the number we refer to

233 throughout the study.

234

235 All the pre-PCR-amplification lab work was conducted in dedicated clean laboratories at the  
236 Lundbeck Foundation GeoGenetics Centre (GLOBE Institute, University of Copenhagen),  
237 according to strict aDNA guidelines<sup>5-7</sup>. To reduce the amount of non-target DNA in the  
238 extracts, the outermost surfaces of the samples were first removed using a sterile cutting  
239 disc. Teeth were processed by separating the crown from the root by a cutting disc and the  
240 inner dentine was then removed from the root with a pointy drilling bit. By this procedure  
241 each root sample was proportionally enriched for the outer cementum layer which is known  
242 for its high endogenous DNA content<sup>2,8,9</sup>. Petrous bones were sampled by cutting off slices  
243 (with a cutting disc) until reaching the dense otic capsule which was used for DNA extraction.  
244 The samples were crushed into smaller pieces before the lysis step.

245

246 To further increase the endogenous DNA yield, we performed a brief 'pre-digestion' step  
247 prior to the extraction protocol following Damgaard et al.<sup>2</sup>. After this pre-digestion, we added  
248 3.5mL of fresh digestion buffer to each sample and incubated them for 24h before the DNA  
249 was purified with silica-in-solution similar to Rohland & Hofreiter<sup>10</sup> but using the optimised  
250 binding buffer from Allentoft et al.<sup>1</sup>. Double-stranded blunt-end libraries were constructed  
251 from the extracted DNA using NEBNext DNA Prep Master Mix Set E6070 (New England  
252 Biolabs Inc.) with protocol modifications<sup>11</sup> and then amplified with indexed Illumina-specific  
253 adapters prepared as in<sup>12</sup>. The DNA concentration of each amplified library was quantified  
254 on an Agilent 2200 TapeStation and sequencing (80bp and 100bp single read) was  
255 performed on Illumina HiSeq 2500 and Illumina HiSeq 4000 platforms at the Danish National  
256 High-throughput DNA Sequencing Centre.

## 257 Basic bioinformatics

258 The Illumina data was base-called using Illumina software *CASAVA (v.1.8.2)*<sup>13</sup> and  
259 sequences were de-multiplexed with the requirement of full matching of the six nucleotide  
260 index which was used for library preparation. Adapter sequences and leading/trailing  
261 stretches of Ns were trimmed from the reads and bases with quality 2 or less were removed  
262 using *AdapterRemoval (v.2.1.3)*. Trimmed reads of at least 30bp were mapped using *bwa*  
263 *(v.0.7.10)*<sup>14</sup> with the seed disabled to allow for higher sensitivity<sup>15</sup>. Reads were mapped to  
264 the human reference genome build 37 including mitochondrial DNA (rCRS) and to  
265 mitochondrial DNA alone. Mapped reads were filtered for mapping quality 30 and sorted  
266 using *Picard (v.1.127)* (<http://picard.sourceforge.net>) and *samtools*<sup>16</sup>. Data was merged to  
267 library level and duplicates removed using *Picard MarkDuplicates (v.1.127)* and hereafter  
268 merged to sample level. Sample level BAMs were re-aligned using *GATK (v.3.3.0)* and



269 hereafter had the md-tag updated and extended BAQs calculated using *samtools calmd*  
270 (*v.1.10*)<sup>16</sup>. Read depth and coverage were determined using *pysam*  
271 (<https://github.com/pysam-developers/pysam>) and *BEDtools* (*v.2.23.0*)<sup>17</sup>.

272  
273

## 274 DNA authentication

275 To investigate authenticity of the ancient DNA molecules, post-mortem DNA damage  
276 patterns were determined using *mapDamage2.0*<sup>18</sup>. Cytosine deamination was recorded for  
277 each sample as the fraction of C-to-T transitions at the first 5' position of the DNA reads when  
278 compared to the reference genome. For the 317 samples included here, we observed C-to-T  
279 deamination fractions ranging from 10.4% to 67.8%, with an average of 38.3% across all 315  
280 samples (**Supplementary Table I**). These numbers generally reflect highly damaged  
281 molecules as expected for DNA that is thousands of years old.

282

283 Next, we applied three different methods to estimate levels of DNA contamination; two based  
284 on mitochondrial genome data and one method investigating X-chromosomal data in males.  
285 All contamination estimates are reported in **Supplementary Table V** with summary values  
286 provided in **Supplementary Table I**.

287

288 First, estimates of present-day human contamination for the mitochondrial genome were  
289 performed using the iterative Bayesian framework implemented in *Schmutzi*<sup>19</sup>. Briefly,  
290 ancient DNA sequences were realigned to the mitochondrial genome of the revised  
291 Cambridge Reference Sequence (rCRS, NCBI Reference Sequence: NC\_012920.1) using  
292 *BWA*<sup>14</sup> with parameters for increased sensitivity (*-n 0.01 -o 2 -l 16500*). The mapping was  
293 performed exclusively to the mitochondrial genome to mitigate the impacts of nuclear  
294 NUMTs on the mitochondrial alignments. The resulting BAM file was used as input for  
295 *Schmutzi* using five iterations and by subsampling samples with coverage to 500X, should  
296 they exceed that<sup>19</sup>. The iterative approach was run using a database of Eurasian  
297 mitogenomes. The point estimate for the final contamination rate with the maximum *a*  
298 *posteriori* probability is reported in the sample summary **Supplementary Table I**, whereas the  
299 95% confidence interval (lower and upper bound as well as the point estimate) are reported  
300 in **Supplementary Table V**.

301

302 Next, we applied *ContamMix* in order to estimate the fraction of non-endogenous reads in  
303 the mitochondrial genome by comparing the reconstructed mtDNA consensus sequence to

304 311 possible contaminate genomes<sup>20</sup>. For each sample, an in-house perl script was used to  
305 construct two different versions of the endogenous mitochondrial genome. The first approach  
306 (CONTAMIX\_APPROX\_1Xdif05) used sites with at least 1x coverage, and at each position a  
307 base was only called if it was observed in at least 50% of reads covering the site. The  
308 second approach (CONTAMIX\_PRECISE\_5Xdif07) only considered sites with at least 5x  
309 coverage and 70% of reads agreeing. Both approaches used reads with a base quality of  
310  $\geq 20$  and mapping quality of  $\geq 30$ .

311

312 Lastly, we applied *ANGSD*<sup>21</sup> on X-chromosomal data in males. This approach quantifies  
313 heterozygosity on the X chromosome. As males only have one copy of the X chromosome,  
314 any heterozygosity is expected to arise from either contamination or sequencing error. As  
315 heterozygosity due to contamination is expected to be restricted to mainly known diagnostic  
316 polymorphic sites, *ANGSD* quantifies the heterozygosity in these sites in. It then compares it  
317 to adjacent sites in order to ascertain the level of background sequencing error, and thus  
318 estimates the extent of contamination. For each sample, we removed the pseudoautosomal  
319 regions on the X chromosome and filtered out reads with a base quality  $< 20$  and mapping  
320 quality  $< 30$ .

321

## 322 DNA contamination - results and implications

323 **Supplementary Table V** lists all the contamination estimation results for the 317 samples  
324 across the three applied methods. The vast majority of the samples show very low levels of  
325 contamination ( $\leq 5\%$ ) across all methods. A total of 33 samples, however, display  
326 contamination estimates  $> 5\%$  in one or more of the methods, but there are considerable  
327 inconsistencies between the methods (**Supplementary Table V**). It is well known that  
328 contamination estimates are not reliable for very low coverage genomic data (refs) and this is  
329 further complicated by DNA damage in the sequences. Indeed, we observe that the 33  
330 potentially problematic samples have an average coverage of 0.11X and a median of 0.06X  
331 which is considerably lower than the full dataset with its average of coverage of 0.75X and  
332 median of 0.26X. So, instead of simply excluding data from these precious samples based  
333 on estimates that are likely imprecise, we “flagged” samples as potentially contaminated in  
334 downstream analyses and took a more analytical approach in the evaluation. Flagging was  
335 applied as follows:

336

337 **Samples with nuclear coverage  $< 0.1X$  and MT coverage  $< 10X$ :** Not flagged, since both  
338 estimates are likely unreliable

339

340 **Samples with nuclear coverage <0.1X and MT coverage ≥10X:** Flagged as contaminated  
341 if any MT estimate is >5%; ignore nuclear estimate as likely unreliable

342

343 **Male samples with nuclear coverage ≥0.1X:** Flagged as contaminated if any nuclear (X-  
344 chromosomal) estimate is > 5%; ignore MT as only nuclear data are relevant for genome-  
345 wide analyses

346

347 **Female samples with nuclear coverage ≥0.1X:** Flagged as contaminated if any MT  
348 estimate is >5% as no nuclear estimate is available

349

350 Based on this approach we have a total of 15 samples (NEO1, NEO3, NEO76, NEO77,  
351 NEO158, NEO162, NEO168, NEO221, NEO226, NEO537, NEO657, NEO671, NEO677,  
352 NEO746, NEO815) that we have flagged as “possibly contaminated” (See Table S2) in our  
353 downstream analyses. The further analytical evaluation of these samples is described in  
354 Supplement Note **S3d**.

355

## 356 References

- 357 1. Allentoft, M. E. *et al.* Population genomics of Bronze Age Eurasia. *Nature* **522**, 167–  
358 172 (2015).
- 359 2. Damgaard, P. B. *et al.* Improving access to endogenous DNA in ancient bones and  
360 teeth. *Sci. Rep.* **5**, 11184 (2015).
- 361 3. Edson, S. M. *et al.* Sampling of the cranium for mitochondrial DNA analysis of human  
362 skeletal remains. *Forensic Science International: Genetics Supplement Series* **2**, 269–  
363 270 (2009).
- 364 4. Gamba, C. *et al.* Genome flux and stasis in a five millennium transect of European  
365 prehistory. *Nat. Commun.* **5**, 5257 (2014).
- 366 5. Knapp, M., Clarke, A. C., Horsburgh, K. A. & Matisoo-Smith, E. A. Setting the stage--  
367 Building and working in an ancient DNA laboratory. *Annals of Anatomy-Anatomischer*  
368 *Anzeiger* **194**, 3–6 (2012).
- 369 6. Fulton, T. L. & Shapiro, B. Setting Up an Ancient DNA Laboratory. *Methods Mol. Biol.*

370 **1963**, 1–13 (2019).

371 7. Orlando, L. *et al.* Ancient DNA analysis. *Nature Reviews Methods Primers* **1**, 1–26  
372 (2021).

373 8. Higgins, D., Kaidonis, J., Townsend, G., Hughes, T. & Austin, J. J. Targeted sampling  
374 of cementum for recovery of nuclear DNA from human teeth and the impact of common  
375 decontamination measures. *Investig. Genet.* **4**, 18 (2013).

376 9. Hansen, H. B. *et al.* Comparing Ancient DNA Preservation in Petrous Bone and  
377 Tooth Cementum. *PLoS One* **12**, e0170940 (2017).

378 10. Rohland, N. & Hofreiter, M. Comparison and optimization of ancient DNA  
379 extraction. *Biotechniques* **42**, 343–352 (2007).

380 11. Margaryan, A. *et al.* Population genomics of the Viking world. *Nature* **585**,  
381 390–396 (2020).

382 12. Meyer, M. & Kircher, M. Illumina sequencing library preparation for highly  
383 multiplexed target capture and sequencing. *Cold Spring Harb. Protoc.* **2010**,  
384 db.prot5448 (2010).

385 13. Hosseini, P., Tremblay, A., Matthews, B. F. & Alkharouf, N. W. An efficient  
386 annotation and gene-expression derivation tool for Illumina Solexa datasets. *BMC Res.*  
387 *Notes* **3**, 183 (2010).

388 14. Li, H. & Durbin, R. Fast and accurate short read alignment with Burrows–  
389 Wheeler transform. *Bioinformatics* **25**, 1754–1760 (2009).

390 15. Schubert, M. *et al.* Improving ancient DNA read mapping against modern  
391 reference genomes. *BMC Genomics* **13**, 178 (2012).

392 16. Li, H. *et al.* The Sequence Alignment/Map format and SAMtools.  
393 *Bioinformatics* **25**, 2078–2079 (2009).

394 17. Quinlan, A. R. & Hall, I. M. BEDTools: a flexible suite of utilities for comparing  
395 genomic features. *Bioinformatics* **26**, 841–842 (2010).

396 18. Jónsson, H., Ginolhac, A., Schubert, M., Johnson, P. L. F. & Orlando, L.  
397 mapDamage2.0: fast approximate Bayesian estimates of ancient DNA damage

- 398 parameters. *Bioinformatics* **29**, 1682–1684 (2013).
- 399 19. Renaud, G., Slon, V., Duggan, A. T. & Kelso, J. Schmutzi: estimation of  
400 contamination and endogenous mitochondrial consensus calling for ancient DNA.  
401 *Genome Biol.* **16**, 224 (2015).
- 402 20. Fu, Q. *et al.* A revised timescale for human evolution based on ancient  
403 mitochondrial genomes. *Curr. Biol.* **23**, 553–559 (2013).
- 404 21. Korneliussen, T. S., Albrechtsen, A. & Nielsen, R. ANGSD: Analysis of Next  
405 Generation Sequencing Data. *BMC Bioinformatics* **15**, 356 (2014).
- 406

## 2) Imputation of ancient DNA

Bárbara Sousa da Mota<sup>1,2</sup>, Andrew Vaughn<sup>3</sup> & Olivier Delaneau<sup>1,2</sup>

<sup>1</sup> Department of Computational Biology, University of Lausanne, Switzerland

<sup>2</sup> Swiss Institute of Bioinformatics, University of Lausanne, Switzerland

<sup>3</sup> Center for Computational Biology, University of California, Berkeley, USA

### Introduction

GLIMPSE is a statistical method developed to impute low-coverage human genomes. It has been shown that GLIMPSE efficiently produces accurate results when employed to impute low-coverage present-day genomes. Here we seek to demonstrate that GLIMPSE is also a suitable imputation tool of low-coverage ancient genomes. To benchmark it, we used a subset of 42 previously published ancient genomes with a mean depth of coverage above 10x (sample list is given in [Table S2.1](#)) that we downsampled to lower coverages in order to match the coverage we observed for the 317 genomes sequenced in the present study. Then, we imputed the resulting genomes and assessed the accuracy of the imputed calls by comparing with the original high-coverage genomes. Specifically, we examined the imputation performance regarding (i) depth of coverage, (ii) minor allele frequency, (iii) ancestry and living period of target samples. We also imputed the samples with the present 'gold standard' method, Beagle4.1<sup>1</sup>, to show how it compares with GLIMPSE v1.0.1<sup>2</sup> (<https://odelaneau.github.io/GLIMPSE/>).

### Methods

We first prepared all necessary files for the imputation step. We used samtools 1.10 to downsample the 42 high-coverage genomes to coverages 0.1x, 0.2x, 0.4x, 0.8x, 1.0x, 2.0x and 4.0x. Then, we prepared a list of candidate variant sites at which imputation was performed by retaining all sites in 1000 Genomes version 3 that were (i) bi-allelic SNPs and (ii) non-singleton (i.e. informative for imputation). For each of the seven tested coverages, we computed genotype likelihoods (VCF/PL field) at all candidate variant sites across all target samples using bcftools 1.10. To minimise computation time, we restricted this data generation procedure to chromosome 20.

Then, we performed imputation of all the resulting VCF files. We first divided chromosome 20 into 35 chunks with size between 1Mb and 2Mb. To prevent edge effects, we also added

442 additional buffer regions of 200kb on each side. Splitting chromosome 20 according to these  
443 parameters was done using GLIMPSE\_chunk v1.0.1. We then performed the imputation with  
444 GLIMPSE\_phase using the reference panel 1000 Genomes version 3, a cosmopolitan  
445 collection of whole genome sequenced modern samples that we feel well adapted to the  
446 various ancestries included in our data set. GLIMPSE\_phase was run using the following  
447 parameters: 10 burn-in iterations (*--burn 10*), 15 main iterations (*--main 15*) and a depth of 2  
448 for the conditional state selection based on Positional Burrows-Wheeler transform (*--pbwt-*  
449 *depth 2*). Finally, we ligated all imputed chunks back together into chromosome-wide VCF  
450 files using GLIMPSE\_ligate v1.0.1.

451

452 In addition to this, we also performed imputation with Beagle 4.1 with exactly the same input  
453 data and reference panel and set its parameters *modelscale* to 2 and *niterations* to 0. These  
454 parameter settings allow Beagle v4.1 to run with tractable running times on the data while  
455 retaining good accuracy. The chunks of data imputed with Beagle v4.1 were ligated together  
456 with bcftools concat 1.10.

457

458 To evaluate imputation performance, we employed GLIMPSE\_concordance v1.0.1 using as  
459 validation set all genotypes in high-coverage data that were covered by at least eight  
460 sequencing reads and at which the most likely genotype was at least 1,000 times more likely  
461 than the second best given the genotype likelihoods reported in the VCF/PL fields.

462 Specifically, we computed (i) the squared correlation and (ii) the concordance between  
463 imputed and validation genotypes. For (i), we compared minor allele dosages (VCF/DS field)  
464 within multiple minor allele frequency (MAF) bins. For (ii), we compared best guess  
465 genotypes (VCF/GT field) and stratified the results depending on the type of validation  
466 genotype: homozygous reference allele, heterozygous and homozygous alternative allele. As  
467 further validation, we increased genomic coverage to 27.5X, 18.9X and 5.4X by deep  
468 sequencing a previously published family trio (mother, father, son) from the Late Neolithic  
469 mass burial at Koszyce in Poland<sup>3</sup>. This presented an opportunity to validate imputed  
470 genotypes and haplotypes on the basis of Mendel's rules of inheritance<sup>4</sup>.

## 471 Results

472 In Fig. S2.1 and S2.2, we present the imputation accuracy per downsampled genome to 1.0x  
473 for chromosome 20. We divided samples into eight classes based on expected genetic  
474 proximity and plotted each class separately. In Fig. S2.1, the minor allele frequency (MAF)  
475 for each of these groups was estimated from the 1000G reference panel, using European,  
476 African, South East Asian, East Asian or American allele frequencies according to the place

477 of origin of samples. As expected, imputation accuracy decreases as minor allele frequency  
478 decreases too. For common variants ( $MAF \geq 5\%$ ), imputation accuracy is remarkably high  
479 ( $>0.9$ ) and closely matches what is usually obtained for modern samples. An exception to  
480 this are African samples which exhibit lower accuracy in some cases (especially for baa01).  
481 This likely results from the reference panel we used that does not represent well the  
482 underlying ancestries of these samples. In Fig. S2.2, we present imputation accuracy per  
483 genome as genotype discordance: the fraction of validation genotypes incorrectly imputed  
484 stratified by homozygous and heterozygous genotypes. As expected, homozygous  
485 reference alleles exhibit lower error rates than heterozygous and homozygous alternative  
486 alleles. Error rates are remarkably low: less than 1% overall and less than 5% for the most  
487 challenging genotypes to impute (RA and AA). Again, African samples exhibit much higher  
488 error rates.

489

490 In Fig. S2.3, we present how imputation accuracy varies for all 42 samples depending on  
491 multiple factors expected to affect accuracy. First, we look at coverage and find that 0.4x  
492 coverage is enough to get 0.9 imputation accuracy at common variants ( $MAF \geq 10\%$ ). Of note,  
493 even 0.1x allows reaching 0.8 at common variants. Second, we considered whether imputing  
494 the 42 jointly with the remaining 1,622 low coverage samples could decrease imputation  
495 accuracy and did not find evidence of this happening: we get very similar accuracy results.  
496 Finally, we check how GLIMPSE imputation does compare to Beagle 4.1 in case of ancient  
497 low coverage samples and find that GLIMPSE brings substantial accuracy boost across the  
498 entire frequency range. In Fig. S2.4, we show the phasing and imputation performance we  
499 obtained across the entire genome for multiple coverages (0.1x to 4x). We obtained  
500 Mendelian error rates from 0.1% at 4X to 0.55% at 0.1X (Extended Figure 1E,  
501 Supplementary figure S2.4A). When looking only at sites at which at least one sample is  
502 heterozygote (i.e. excluding triple homozygotes), we find that Mendel error rate ranges from  
503 less than 2% at 4x and up to 8-10% for 0.1x (Supplementary figure S2.4B). Similarly, we  
504 obtained switch error rates between 2% and 6%. Altogether, our validation analysis showed  
505 that ancient European genomes can be imputed confidently from coverages above 0.4x and  
506 highly valuable data can still be obtained with coverages as low as 0.1X when using specific  
507 QC on the imputed data.

508

### 509 *Imputation of the full dataset*

510 Given the outcome of the benchmarking described above, we then proceeded with the  
511 imputation of the full dataset. In total, we retained 1,664 samples with at least 0.1x mean  
512 coverage. Similarly as before, we extracted all variable positions in 1000 Genomes version 3  
513 that correspond to non-singleton bi-allelic SNPs and call genotype likelihoods at all these



514 variants for all samples using bcftools v1.10, thereby resulting in a VCF containing data for  
515 1,664 samples across 43,285,119 SNPs. Of note, the reference genome used in this  
516 analysis was hg19, b37. We then used GLIMPSE\_chunk to split all the data into 1,841  
517 chunks of 1Mb to 2Mb with overlapping 200kb buffers on each side. All these chunks of data  
518 were imputed using GLIMPSE\_phase v1.0.1 with 1000 Genomes version 3 as a reference  
519 panel of haplotypes. Imputed chunks were ligated back together using GLIMPSE\_ligate  
520 v1.0.1, resulting in chromosome-wide VCF files containing the following information: (i) best  
521 genotype guesses (VCF/GT field), (ii) expected non-reference allele dosage (VCF/DS field),  
522 (iii) genotype posterior probabilities /VCF/GP field) and (iv) haplotype pairs sampled during  
523 imputation (VCF/HS field). Finally, we used GLIMPSE\_sample v1.0.1 to produce consensus  
524 haplotype calls at all variants for all samples from the VCF/HS field.  
525

## 526 Effects of Low coverage

527 It should be noted, however, that certain issues may arise when using this imputation on very  
528 low coverage data. Specifically, the imputation errors GLIMPSE makes with low coverage  
529 data tend to predominantly occur by incorrectly filling in the major allele at a given SNP. This  
530 is not an issue specific to GLIMPSE itself but is instead inherent to any kind of Bayesian  
531 approach to imputation. In the absence of informative data about the allele at a particular  
532 SNP, imputation methods will fall back on the reference panel, or a set of confidently imputed  
533 genomes, for imputation, which will tend to fill in missing data with the major allele at each  
534 SNP.

535

536 To illustrate this phenomenon, we took the 1,492 samples that passed all filters (described in  
537 detail in Supplementary Note 3d) and retained only SNPs passing the 1000 Genomes strict  
538 mask. For computational considerations, we considered only chromosome 8, which gave  
539 1,139,150 total SNPs. In Figure S2.5, we plotted, for each of the 2,984 haplotypes, the total  
540 number of allele differences between that genome and the reference sequence against the  
541 coverage of that sample. Computing Spearman's  $\rho$  showed a substantial correlation, which  
542 persisted after filtering for SNPs on INFO > 0.5, leaving 584,280 SNPs, and INFO > 0.8,  
543 leaving 336,842 SNPs (Figures S2.6 and S2.7 respectively). Visually, it appeared that this  
544 correlation was driven by a reduced number of differences to the reference sequence among  
545 very low coverage genomes, and we confirmed this by considering SNPs of all INFO scores  
546 and noticing that the correlation decreases sharply when samples below 0.3x are dropped  
547 (Figure S2.9) and can be decreased even further by dropping samples below 2x coverage  
548 (Figure S2.10). We also confirmed that the correlation is very small when only retaining very

549 high INFO score SNPs, specifically  $\text{INFO} > 0.97$ , which retained 56,925 SNPs (Figure S2.8).  
550 This is to be expected, as the imputation for high-confidence SNPs should show no  
551 significant biases.

552

553 This phenomenon, where coverage can be predictive of sequence, is important to keep in  
554 mind when running certain types of analyses on these data. Analyses such as PCA and  
555 admixture modelling, which mainly rely on common SNPs that are shared among many  
556 individuals, are not expected to be significantly affected, as imputation is quite accurate for  
557 SNPs with high MAF (see Supplementary Note 3d for a thorough analysis of how coverage  
558 affects PCA). However, this observation has important implications for genealogy  
559 reconstruction and other analyses that rely on overall sequence similarity or otherwise utilise  
560 rare SNPs. We recommend that researchers using these imputed data carefully consider  
561 what effect the inclusion of low coverage samples might have on their analyses and then  
562 utilise appropriate MAF/INFO filters on SNPs and/or coverage filters on samples as  
563 necessary.

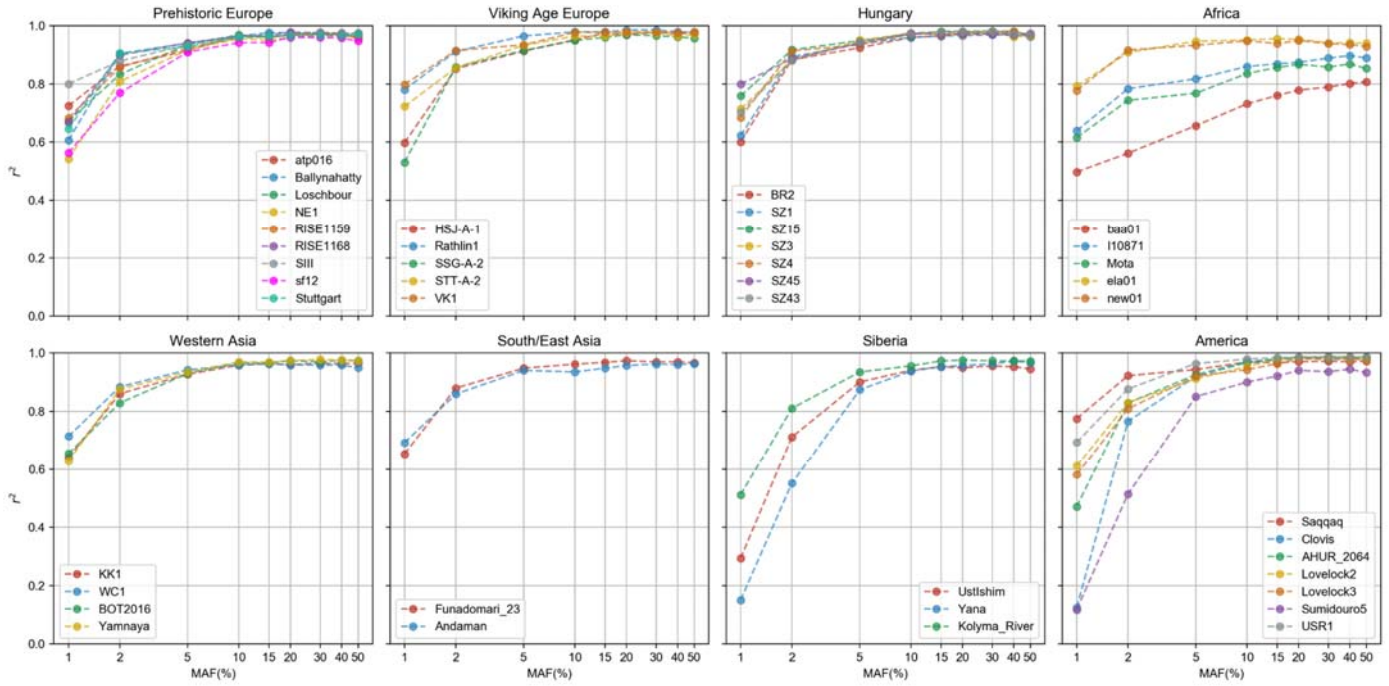

564

565 **Figure S2.1: Per-sample imputation accuracy (1).** Imputation accuracy as squared  
 566 correlation between imputed and validation genotypes (y-axis). Samples were grouped into  
 567 eight broad categories based on genetic proximity. Each of the plots corresponds to one of  
 568 such categories. Minor allele frequencies (MAF; x-axis) were estimated from 1000 Genomes  
 569 version 3 for matched continental groups (see Table S2.1 for details).

570

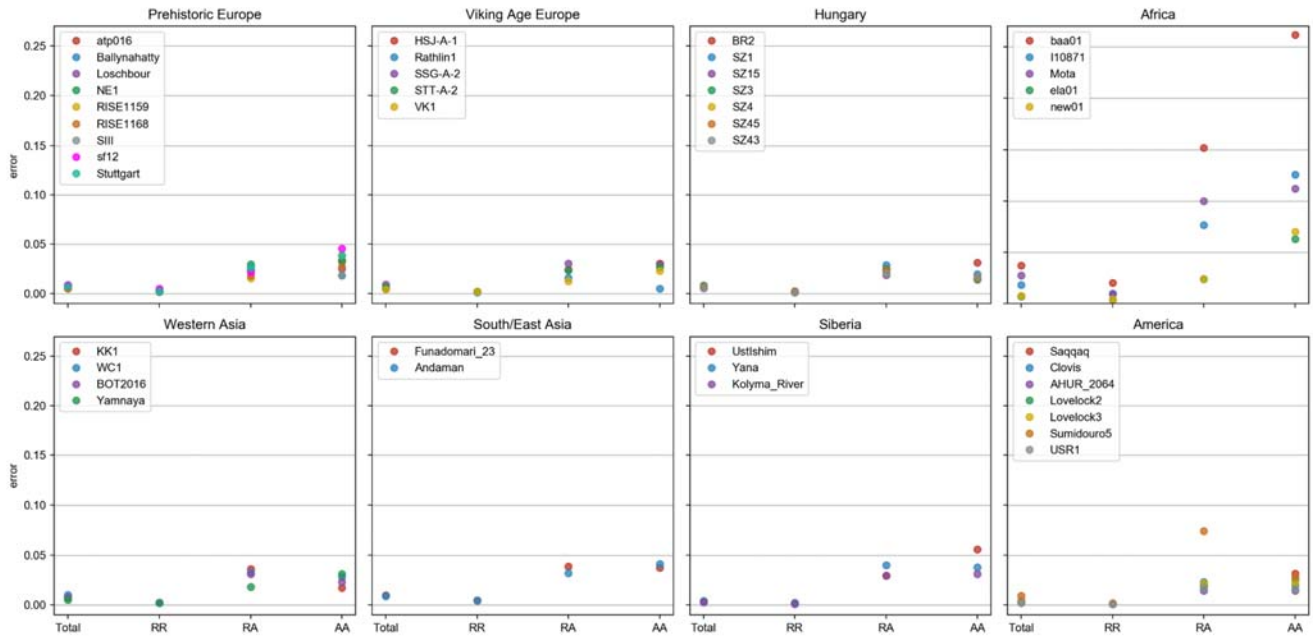

571 **Figure S2.2: Per-sample imputation accuracy (2).** Imputation accuracy as discordance  
 572 between imputed and validation genotypes (y-axis). Samples were grouped into eight broad  
 573 categories based on genetic proximity. Each of the plots corresponds to one of such  
 574 categories. We report results across four types of genotypes: (i) Total; all genotypes  
 575 together, (ii) RR; validation genotypes with two copies of the reference allele, (iii) RA;  
 576 heterozygous genotypes (iv) AA; validation genotypes with two copies of the alternative  
 577 allele.  
 578

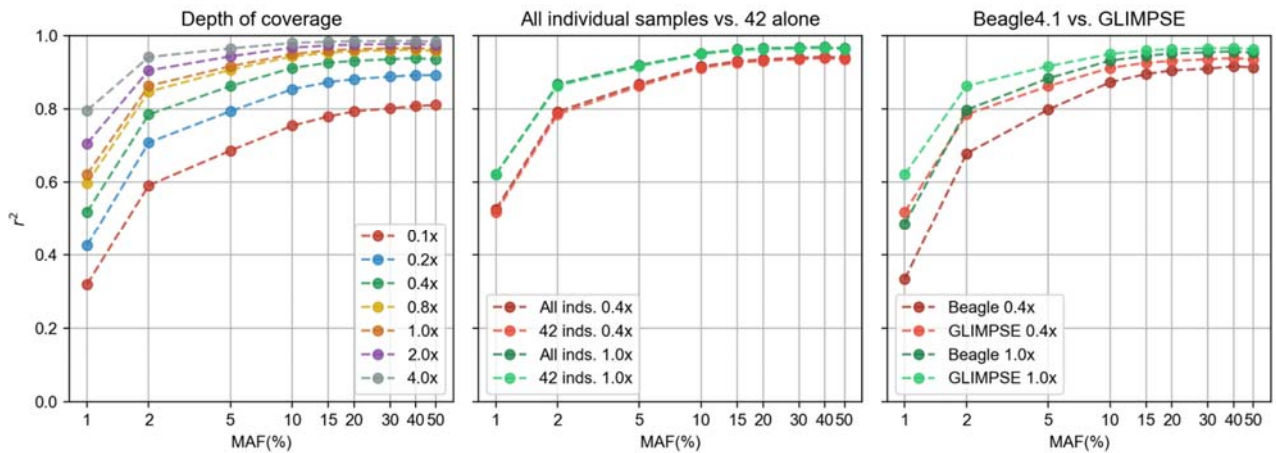

579 **Figure S2.3: Main parameters affecting imputation accuracy.** Imputation accuracy of  
 580 GLIMPSE across the 42 samples regarding, from left to right: (i) sequencing coverage; (ii)  
 581 effect of jointly imputing all 1.6K individual samples compared to imputing only the 42  
 582 downsampled genomes, (iii) imputation done with Beagle4.1.  
 583  
 584



586 **Figure S2.4: Imputation and phasing accuracy for the Koszyce trio.** (A) Mendel error  
587 rate across the 22 autosomes. A Mendel error is counted when the parental and offspring  
588 genotypes violate Mendel transmission rules. (B) Same as before, excluding sites at which  
589 all three samples are REF/REF in the high coverage data. (C) Switch error rates averaged  
590 over the 3 samples. A switch error is counted between two consecutive heterozygous

**A. Mendel error rate at all sites**

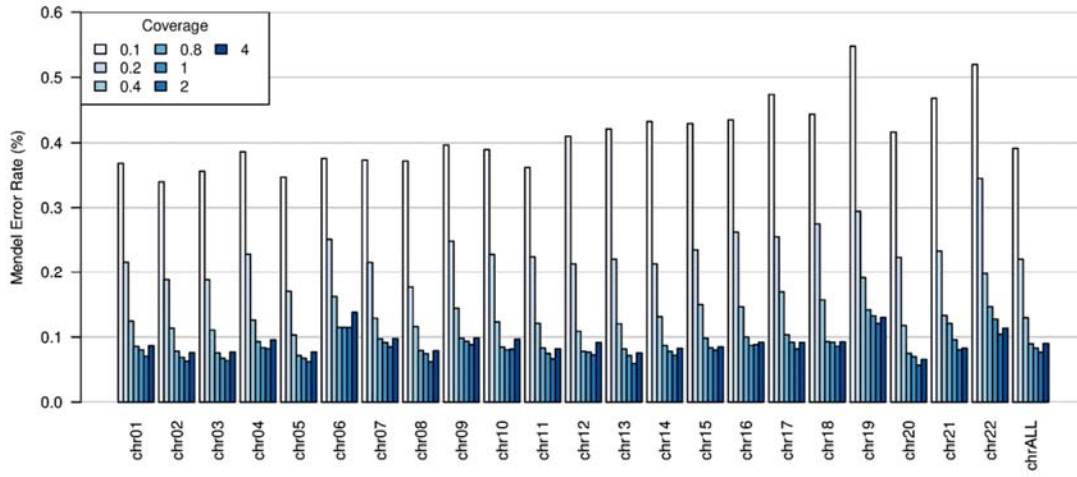

**B. Mendel error rate at variable sites**

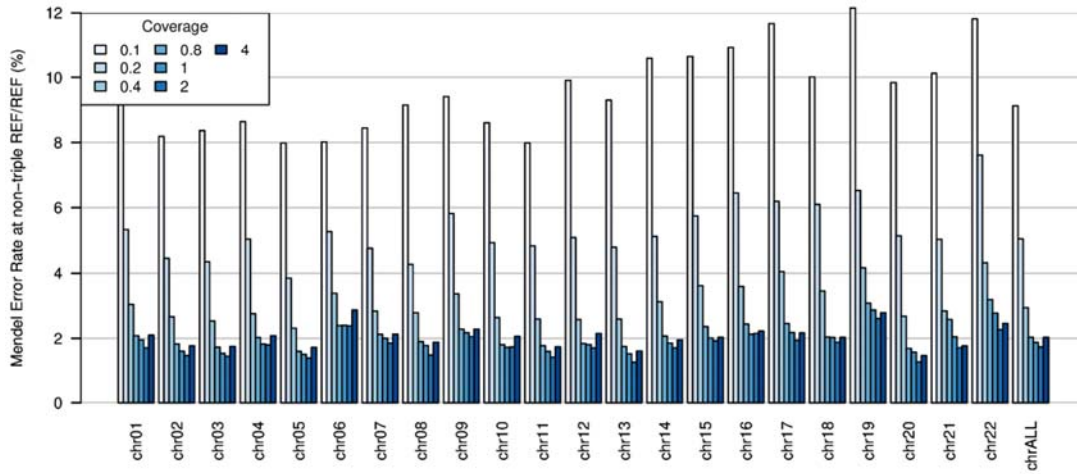

**C. Switch error rate**

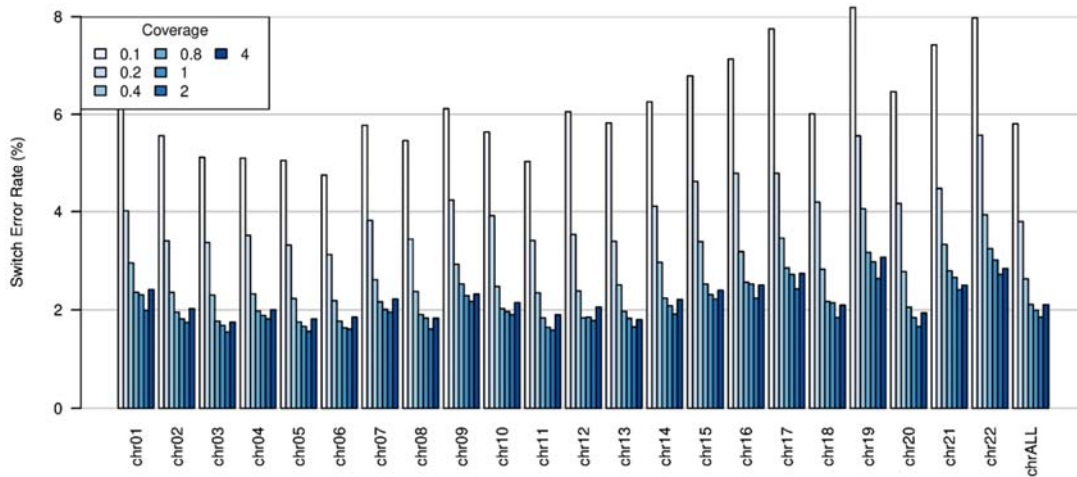

591 genotypes when the reported haplotypes are not consistent with those derived from the trio.

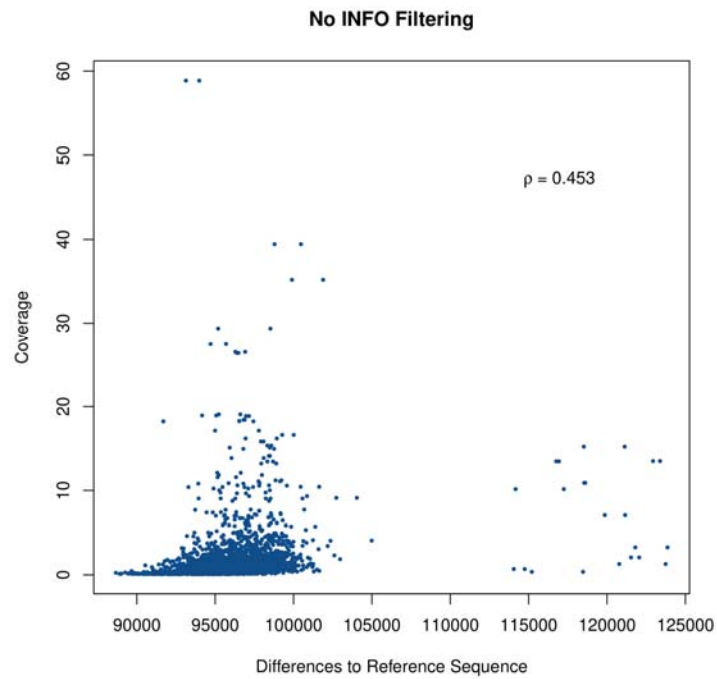

592 **Figure S2.5.** Total number of allele differences to the reference sequence for each of the  
 593 2,984 haplotypes against coverage, without INFO filtering.

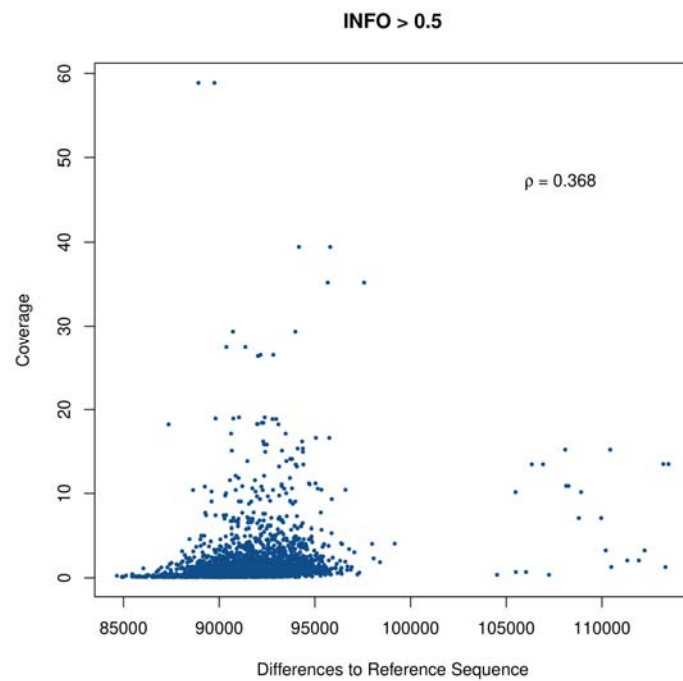

594 **Figure S2.6.** Total number of allele differences to the reference sequence for each of the  
 595 2,984 haplotypes against coverage, with filtering for SNPs on INFO > 0.5.



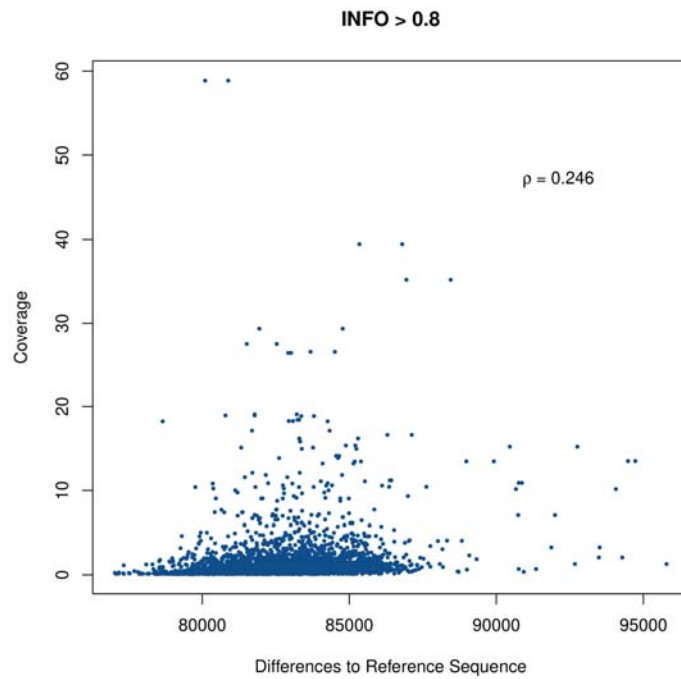

596 **Figure S2.7.** Total number of allele differences to the reference sequence for each of the  
 597 2,984 haplotypes against coverage, with filtering for SNPs on INFO > 0.8.

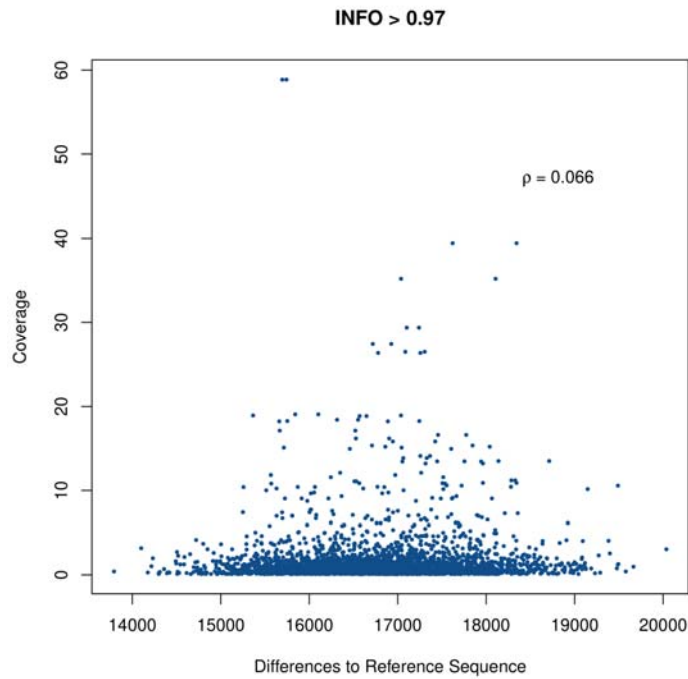

598 **Figure S2.8.** Total number of allele differences to the reference sequence for each of the  
 599 2,984 haplotypes against coverage, with filtering for SNPs on INFO > 0.97.

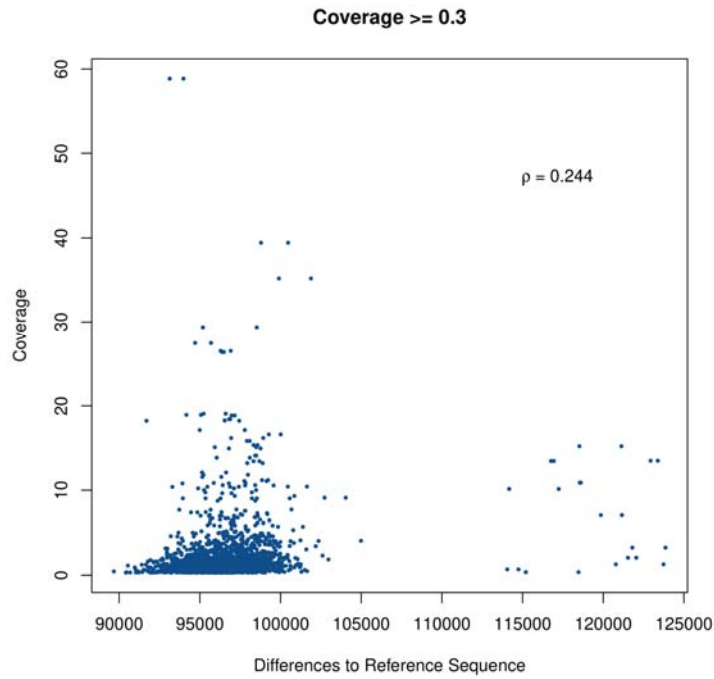

600 **Figure S2.9.** Total number of allele differences to the reference sequence for each of the  
 601 2,984 haplotypes against coverage, with filtering for samples on coverage  $\geq 0.3$ .

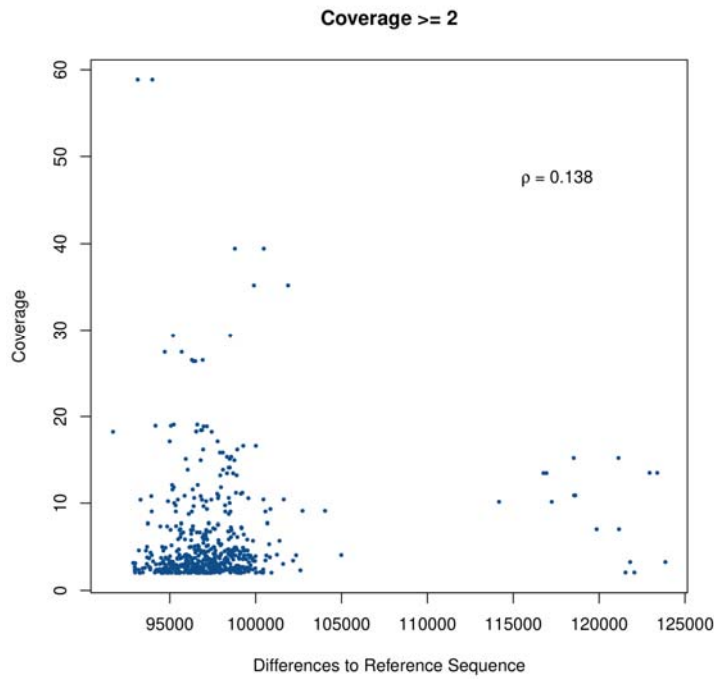

602 **Figure S2.10.** Total number of allele differences to the reference sequence for each of the  
 603 2,984 haplotypes against coverage, with filtering for samples on coverage  $\geq 2$ .  
 604

605  
606  
607  
608

| SampleID     | Country      | Age (yBP)     | MAF 1000G group | Coverage | Reference                                  |
|--------------|--------------|---------------|-----------------|----------|--------------------------------------------|
| atp16        | Spain        | 4867 – 5212   | EUR             | 13X      | Günther et al. 2015 <sup>5</sup>           |
| Stuttgart    | Germany      | 7020 – 7260   | EUR             | 16X      | Lazaridis et al. 2014 <sup>6</sup>         |
| Loschbour    | Luxembourg   | 7940 – 8160   | EUR             | 18X      | Lazaridis et al. 2014 <sup>6</sup>         |
| Ballynahatty | Ireland      | 4970 – 5293   | EUR             | 10X      | Cassidy et al. 2016 <sup>7</sup>           |
| sf12         | Sweden       | 8757 – 9033   | EUR             | 59X      | Günther et al. 2018 <sup>8</sup>           |
| NE1          | Hungary      | 7021 – 7256   | EUR             | 18X      | Gamba et al. 2014 <sup>9</sup>             |
| Sunghir III  | Russia       | 33031 – 35154 | EUR             | 11X      | Sikora et al. 2017 <sup>10</sup>           |
| Rathlin1     | Ireland      | 3835 – 3976   | EUR             | 11X      | Cassidy et al. 2016 <sup>7</sup>           |
| SSG-A2       | Iceland      | 950 – 1100    | EUR             | 10X      | Ebenesersdóttir et al. 2018 <sup>11</sup>  |
| HSJ-A1       | Iceland      | 950 – 1080    | EUR             | 29X      | Ebenesersdóttir et al. 2018 <sup>11</sup>  |
| STT-A2       | Iceland      | 950 – 1050    | EUR             | 14X      | Ebenesersdóttir et al. 2018 <sup>11</sup>  |
| VK1          | Greenland    | 750 – 950     | EUR             | 12X      | Margaryan et al. 2020 <sup>12</sup>        |
| BR2          | Hungary      | 3060 – 3220   | EUR             | 18X      | Gamba et al. 2014 <sup>9</sup>             |
| SZ15         | Hungary      | 1346 – 1538   | EUR             | 11X      | Amorim et al. 2018 <sup>13</sup>           |
| SZ3          | Hungary      | 1346 – 1538   | EUR             | 11X      | Amorim et al. 2018 <sup>13</sup>           |
| SZ4          | Hungary      | 1347 – 1538   | EUR             | 10X      | Amorim et al. 2018 <sup>13</sup>           |
| SZ45         | Hungary      | 1348 – 1538   | EUR             | 10X      | Amorim et al. 2018 <sup>13</sup>           |
| SZ43         | Hungary      | 1349 – 1538   | EUR             | 12X      | Amorim et al. 2018 <sup>13</sup>           |
| SZ1          | Hungary      | 1150 – 1350   | EUR             | 11X      | Amorim et al. 2018 <sup>13</sup>           |
| baa01        | South Africa | 1831 – 1986   | AFR             | 14X      | Schlebusch et al. 2017 <sup>14</sup>       |
| ela01        | South Africa | 453 – 533     | AFR             | 13X      | Schlebusch et al. 2017 <sup>14</sup>       |
| new01        | South Africa | 327 – 508     | AFR             | 11X      | Schlebusch et al. 2017 <sup>14</sup>       |
| I10871       | Cameroon     | 7800 – 7970   | AFR             | 15X      | Lipson et al. 2020 <sup>15</sup>           |
| Mota         | Ethiopia     | 4419 – 4525   | AFR             | 10X      | Gallego Llorente et al. 2015 <sup>16</sup> |

|                  |            |               |     |     |                                              |
|------------------|------------|---------------|-----|-----|----------------------------------------------|
| KK1              | Georgia    | 9550 – 9890   | EUR | 12X | Broushaki et al. 2016 <sup>17</sup>          |
| WC1              | Iran       | 9032 – 9405   | EUR | 10X | Broushaki et al. 2016 <sup>17</sup>          |
| BOT2016          | Kazakhstan | 5318 – 5582   | EUR | 14X | de Barros Damgaard et al. 2018 <sup>18</sup> |
| Yamnaya Karagash | Kazakhstan | 4837 – 4968   | EUR | 26X | de Barros Damgaard et al. 2018 <sup>18</sup> |
| Andaman          | India      | 30 – 150      | SAS | 17X | Moreno-Mayar et al. 2018 <sup>19</sup>       |
| Funadomari 23    | Japan      | 3550 – 3960   | EAS | 39X | Kanzawa-Kiriyama et al. 2019 <sup>20</sup>   |
| Ust'-Ishim       | Russia     | 42560 – 47480 | ALL | 35X | Fu et al. 2014 <sup>21</sup>                 |
| Yana 1           | Russia     | 30950 – 32950 | ALL | 27X | Sikora et al. 2019 <sup>22</sup>             |
| Kolyma 1         | Russia     | 9665 – 9906   | ALL | 15X | Sikora et al. 2019 <sup>22</sup>             |
| USR1             | USA        | 11270 – 11600 | ALL | 17X | Moreno-Mayar et al. 2018 <sup>23</sup>       |
| AHUR_2064        | USA        | 10770 – 11170 | AMR | 19X | Moreno-Mayar et al. 2018 <sup>19</sup>       |
| Lovelock2        | USA        | 1818 – 1942   | AMR | 15X | Moreno-Mayar et al. 2018 <sup>19</sup>       |
| Lovelock3        | USA        | 567 – 687     | AMR | 19X | Moreno-Mayar et al. 2018 <sup>19</sup>       |
| Saqqaq           | Greenland  | 3600 – 4170   | AMR | 13X | Rasmussen et al. 2010 <sup>24</sup>          |
| Clovis           | USA        | 12572 – 12726 | AMR | 15X | Rasmussen et al. 2014 <sup>25</sup>          |
| Sumidouro5       | Brazil     | 10258 – 10552 | AMR | 16X | Moreno-Mayar et al. 2018 <sup>19</sup>       |
| RISE1159 *       | Poland     | 4840 – 4709   | EUR | 27X | Schroeder et al. 2019 <sup>3</sup>           |
| RISE1168 *       | Poland     | 4840 – 4709   | EUR | 19X | Schroeder et al. 2019 <sup>3</sup>           |
| RISE1160 *       | Poland     | 4840 – 4709   | EUR | 5X  | Schroeder et al. 2019 <sup>3</sup>           |

609  
610  
611  
612  
613  
614  
615  
616  
617  
618  
619

**Table S2.1: Detailed list of high coverage ancient validation genomes.** From left to right: (1) original sample ID, (2) country of origin, (3) estimated age, (4) best matching continental group in 1000 Genomes used to stratify imputation accuracy results and (5) original coverage from which down-sampling has been performed. \*indicates the Neolithic Koszyce trio that was first published in Schroeder et al. <sup>3</sup> but now sequenced to higher depth in this study and used for imputation validation purposes. RISE1160 is not counted among the 42 high coverage genomes.

## 620 References

- 621 1. Browning, B. L. & Browning, S. R. Genotype Imputation with Millions of Reference  
622 Samples. *Am. J. Hum. Genet.* **98**, 116–126 (2016).
- 623 2. Rubinacci, S., Ribeiro, D. M., Hofmeister, R. J. & Delaneau, O. Efficient phasing and  
624 imputation of low-coverage sequencing data using large reference panels. *Nat. Genet.*  
625 **53**, 412 (2021).
- 626 3. Schroeder, H. *et al.* Unraveling ancestry, kinship, and violence in a Late Neolithic  
627 mass grave. *Proc. Natl. Acad. Sci. U. S. A.* **116**, 10705–10710 (2019).
- 628 4. Bateson, W. *Mendel's Principles of Heredity.* (Cambridge University Press, 1902).
- 629 5. Günther, T. *et al.* Ancient genomes link early farmers from Atapuerca in Spain to  
630 modern-day Basques. *Proc. Natl. Acad. Sci. U. S. A.* **112**, 11917–11922 (2015).
- 631 6. Lazaridis, I. *et al.* Ancient human genomes suggest three ancestral populations for  
632 present-day Europeans. *Nature* **513**, 409–413 (2014).
- 633 7. Cassidy, L. M. *et al.* Neolithic and Bronze Age migration to Ireland and establishment  
634 of the insular Atlantic genome. *Proc. Natl. Acad. Sci. U. S. A.* **113**, 368–373 (2016).
- 635 8. Günther, T. *et al.* Population genomics of Mesolithic Scandinavia: Investigating early  
636 postglacial migration routes and high-latitude adaptation. *PLoS Biol.* **16**, e2003703  
637 (2018).
- 638 9. Gamba, C. *et al.* Genome flux and stasis in a five millennium transect of European  
639 prehistory. *Nat. Commun.* **5**, 5257 (2014).
- 640 10. Sikora, M. *et al.* Ancient genomes show social and reproductive behavior of  
641 early Upper Paleolithic foragers. *Science* **358**, 659–662 (2017).
- 642 11. Ebenesersdóttir, S. S. *et al.* Ancient genomes from Iceland reveal the making  
643 of a human population. *Science* **360**, 1028–1032 (2018).
- 644 12. Margaryan, A. *et al.* Population genomics of the Viking world. *Nature* **585**,  
645 390–396 (2020).
- 646 13. Amorim, C. E. G. *et al.* Understanding 6th-century barbarian social

- 647 organization and migration through paleogenomics. *Nat. Commun.* **9**, 3547 (2018).
- 648 14. Schlebusch, C. M. *et al.* Southern African ancient genomes estimate modern  
649 human divergence to 350,000 to 260,000 years ago. *Science* **358**, 652–655 (2017).
- 650 15. Lipson, M. *et al.* Ancient West African foragers in the context of African  
651 population history. *Nature* **577**, 665–670 (2020).
- 652 16. Gallego Llorente, M. *et al.* Ancient Ethiopian genome reveals extensive  
653 Eurasian admixture in Eastern Africa. *Science* **350**, 820–822 (2015).
- 654 17. Broushaki, F. *et al.* Early Neolithic genomes from the eastern Fertile Crescent.  
655 *Science* **353**, 499–503 (2016).
- 656 18. de Barros Damgaard, P. *et al.* The first horse herders and the impact of early  
657 Bronze Age steppe expansions into Asia. *Science* **360**, (2018).
- 658 19. Moreno-Mayar, J. V. *et al.* Early human dispersals within the Americas.  
659 *Science* **362**, (2018).
- 660 20. Kanzawa-Kiriyama, H. *et al.* Late Jomon male and female genome sequences  
661 from the Funadomari site in Hokkaido, Japan. *Anthropol. Sci.* **127**, (2019).
- 662 21. Fu, Q. *et al.* Genome sequence of a 45,000-year-old modern human from  
663 western Siberia. *Nature* **514**, 445–449 (2014).
- 664 22. Sikora, M. *et al.* The population history of northeastern Siberia since the  
665 Pleistocene. *Nature* **570**, 182–188 (2019).
- 666 23. Moreno-Mayar, J. V. *et al.* Terminal Pleistocene Alaskan genome reveals first  
667 founding population of Native Americans. *Nature* **553**, 203–207 (2018).
- 668 24. Rasmussen, M. *et al.* Ancient human genome sequence of an extinct Palaeo-  
669 Eskimo. *Nature* **463**, 757–762 (2010).
- 670 25. Rasmussen, M., Anzick, S. L., Waters, M. R. & Skoglund, P. The genome of a  
671 Late Pleistocene human from a Clovis burial site in western Montana. *Nature* (2014).
- 672

## 3) Demographic inference

### 3a) Phylogenetic analysis of mtDNA sequences

Tharsika Vimala<sup>1</sup>, Martin Sikora<sup>1</sup>

<sup>1</sup>Lundbeck Foundation GeoGenetics Centre, GLOBE Institute, University of Copenhagen,  
Copenhagen, Denmark

#### Methods

We carried out a phylogenetic tree analysis using the reconstructed mitochondrial genomes from the human remains presented in this study. Only sequences with less than 2000 missing sites were included in the analysis to avoid biases caused by missing data. Sequences were aligned using *mafft*<sup>1</sup> and subsequently inputted to the maximum likelihood (ML) based phylogenetic tree inference tool *RAxML-ng*<sup>2</sup>. The analysis was carried out by using the 'all-in-one'- option performing both an ML search and bootstrapping (--all --bs-trees 100) along with the substitution model GTR+I+G4.

#### Results

From the resulting phylogenetic tree, we obtain an overview of how the remains are distributed across the haplogroups in our dataset. We find haplogroup U to be the most common haplogroup in the analysed set of individuals. Especially, subclade U5 is commonly observed among European hunter-gatherers. Focusing on the subclade U5a, we find the remains distributed into two main sub-haplogroups classified as U5a1 and U5a2. U5a1 is mainly influenced by Eastern European hunter-gatherers from Russia and Ukraine, while we also find the Scandinavian remains, NEO752 and NEO18, represented in this clade. In particular, the 9.8 kya old remains of NEO18 are interesting as the genetic structure analysis of the autosomes of NEO18 show evidence of Ukrainian hunter-gatherer ancestry (Figure 2, main). Haplogroup U5a2 shows a higher representation of Danish hunter-gatherers, specifically in subclade U5a2a, in which we also identify two Mesolithic Iberian individuals, NEO648 and NEO938. We likewise observe a Mesolithic Latvian individual (NEO307) within the U5a2d subclade, which is primarily dominated by Ukrainian and Russian hunter-gatherers (Figure S3a.1). These observations are congruent with the autosomal structure analysis displaying Ukrainian hunter-gatherer ancestry in these individuals. The clade

706 representing haplogroup U5b is mainly influenced by Danish hunter-gatherers along with a  
707 few Western European hunter-gatherers from Britain, France, and Iberia. We do, however,  
708 also observe a few Ukrainian hunter-gatherers clustering closely to the Danish hunter-  
709 gatherer individuals, which could indicate a continuous level of gene flow from Eastern  
710 Europe into Scandinavia. Additionally, we identify a single farmer individual, NEO597,  
711 carrying U5b, which is a rare example of genetic continuity of a hunter-gatherer associated  
712 haplogroup (Figure S3a.1). This contrasts the genetic transition otherwise observed with the  
713 arrival of the early farmers. We find a similar overall pattern within the genetic variation of  
714 U4, which is mainly influenced by Eastern European hunter-gatherers. Furthermore, we  
715 identify individuals with steppe-ancestry as well as two Danish hunter-gatherer remains  
716 clustering within the same clade. In the clade of haplogroup U2 we find a single Mesolithic  
717 Iberian carrying haplogroup U2'3'4'7'8'9, while the rest of the remains in the U2-clade belong  
718 to the sub-haplogroup U2e. U2e is carried by Eastern European hunter-gatherers, although  
719 we also identify a significant number of remains from the forest steppe clustering in U2e as  
720 well. The Danish Neolithic remains of NEO792 are interesting as this individual carried the  
721 highest proportion of steppe-ancestry among the Danish individuals. Haplogroup K, a  
722 descending haplogroup of U8, includes a combination of farmers and hunter-gatherers.  
723 Specifically, we find the haplogroup K1e to be carried by Danish hunter-gatherers, while K1a  
724 and K1b are mainly influenced by Neolithic individuals from Scandinavia (Figure S3a. 2). The  
725 highest frequency of early farmers is found within the genetic variation of haplogroup H, a  
726 descending haplogroup of HV. Both HV and JT are mainly influenced by Western European  
727 farmers (Figure S3a.3).

## 728 Conclusion

729 In overall we find most of the Scandinavian hunter-gatherers clustering within the variation of  
730 haplogroup U. Given the high number of human remains represented, we were able to obtain  
731 a phylogeny of a relatively high resolution of this particular haplogroup. Our results show  
732 evidence of a continuous migration of especially Eastern hunter-gatherers into Scandinavia.  
733 Most of the early farmers carried haplogroup H or fell within haplogroup JT, while a few  
734 farmers carried haplogroup K. We find individuals with steppe ancestry mainly clustering  
735 together under macro haplogroup M, although we also identify a few steppe individuals in U2  
736 closely related to a Danish Neolithic individual, NEO792, who also carried a high proportion  
737 of steppe-ancestry in the nuclear genome.  
738



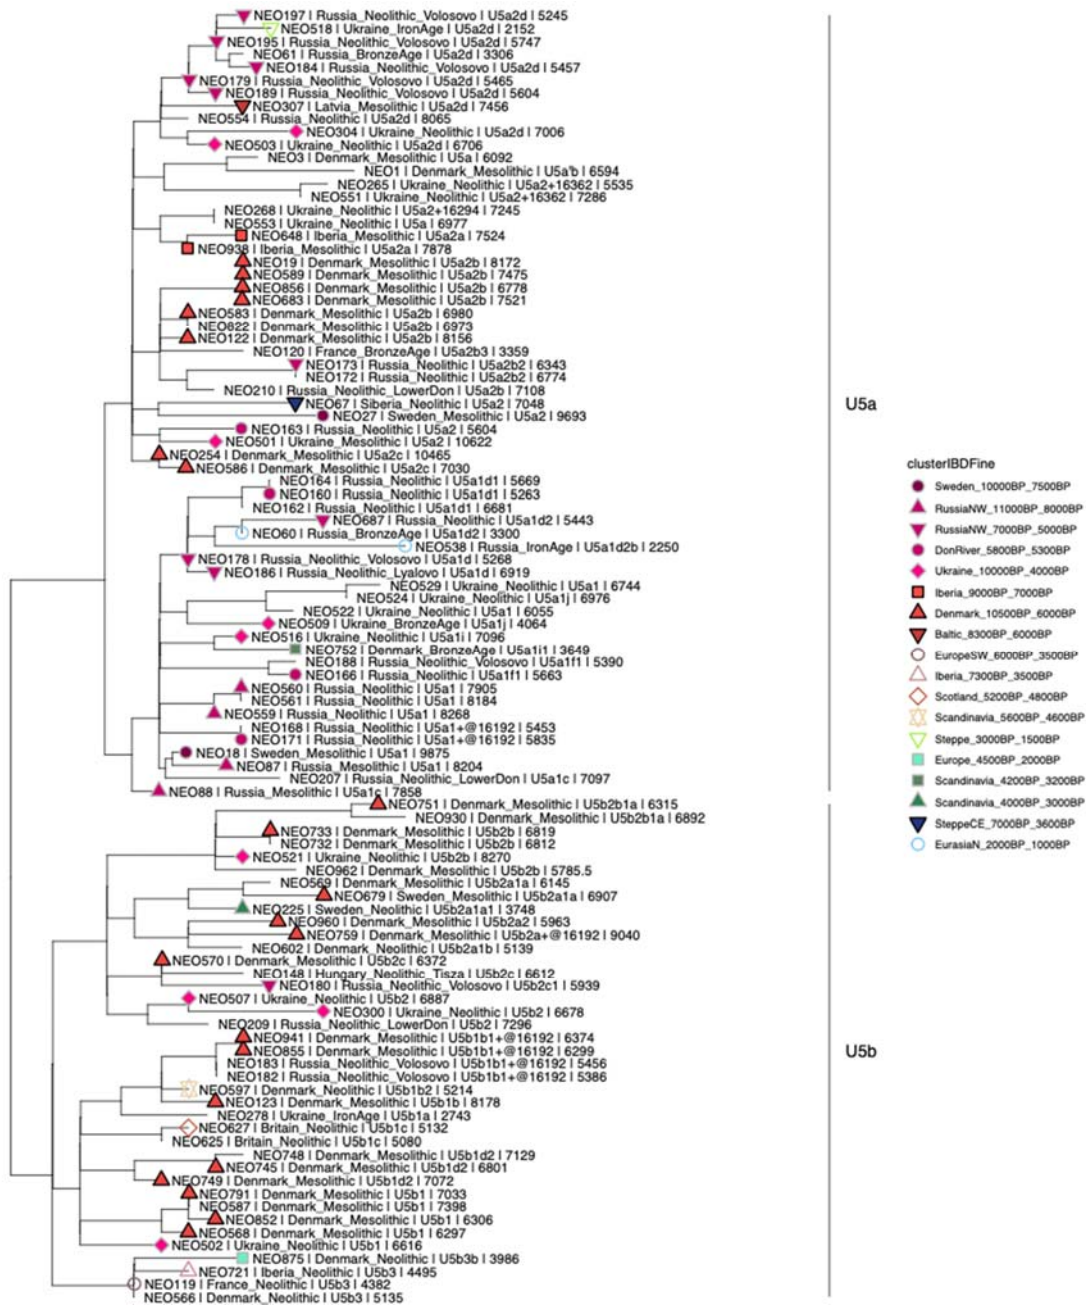

739

740 **Figure S3a.1. Maximum likelihood tree of haplogroup U5**

741 Maximum likelihood tree displaying the phylogenetic relationship between the human  
 742 remains carrying haplogroup U5 and more specifically the two subclades U5a and U5b.  
 743 Labels include information on sample ID, group ID, haplogroup, and age of the respective  
 744 remains. Symbols indicate the specific fine scale IBD cluster listed in the legend.

745

746

747

748

749 0

750 **Figure S3a.2. Maximum likelihood tree of haplogroup U excluding U5**

751 Maximum likelihood tree displaying the phylogenetic relationship between the human  
752 remains carrying a descending haplogroup of U with the exception of U5. Labels include  
753 information on sample ID, group ID, haplogroup, and age of the respective remains. Symbols  
754 indicate the specific fine scale IBD cluster listed in the legend.  
755

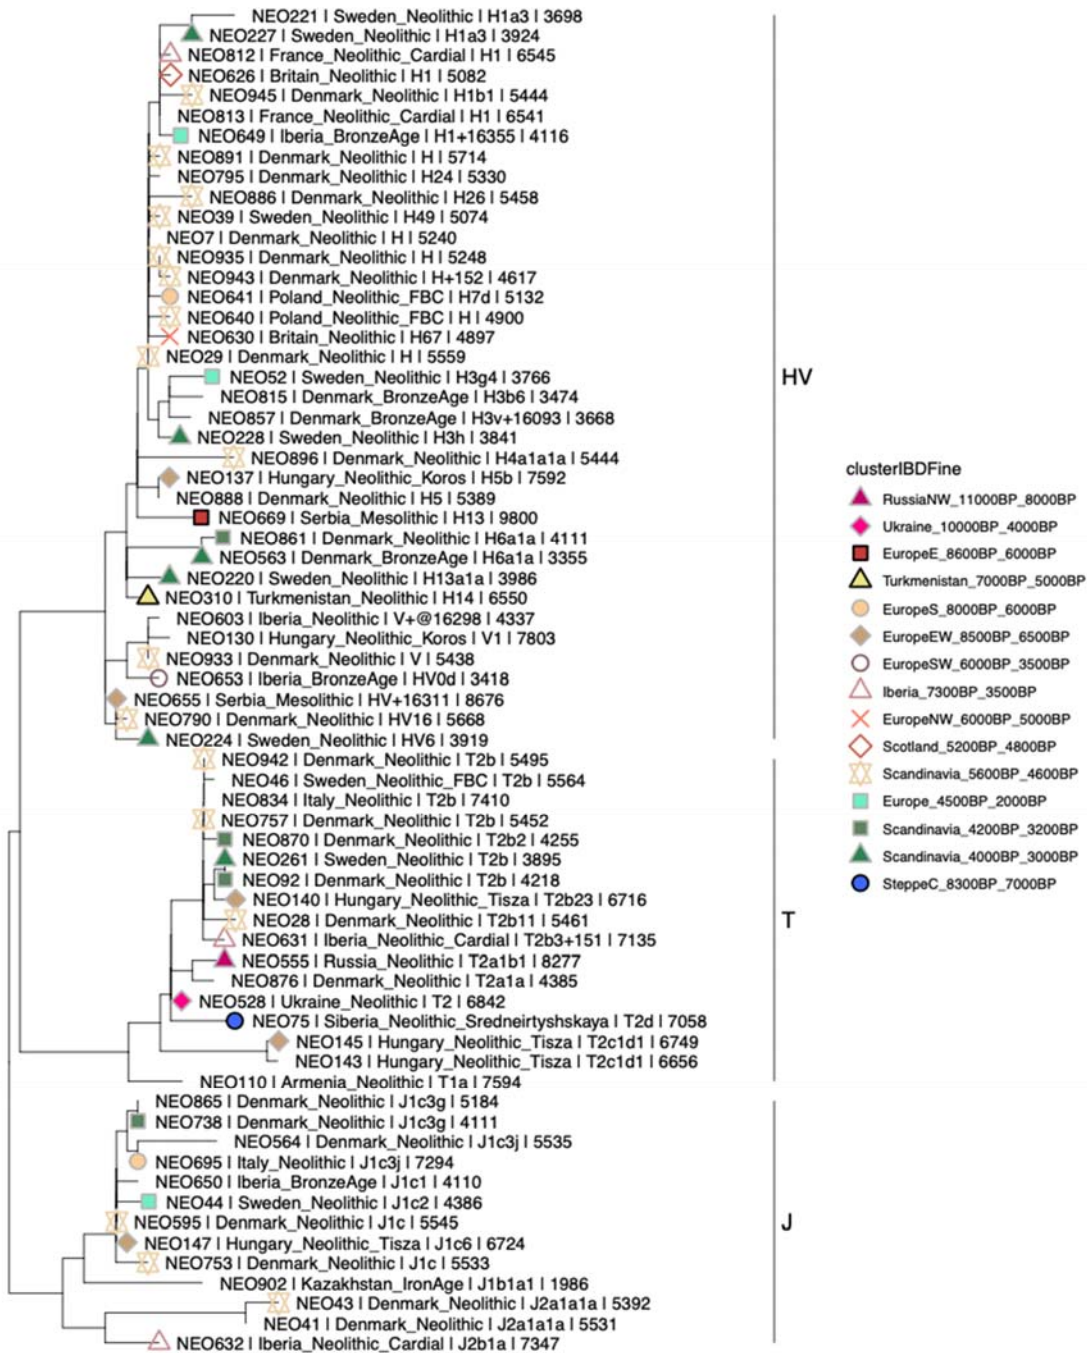

756

757 **Figure S3a.3. Maximum likelihood tree of haplogroup farmer-associated haplogroups**

758 Maximum likelihood tree displaying the phylogenetic relationship between the human  
759 remains carrying an HV or JT descending haplogroup. Labels include information on sample  
760 ID, group ID, haplogroup, and age of the respective remains. Symbols indicate the specific  
761 fine scale IBD cluster listed in the legend.

762  
763

## 764 References

- 765 1. Kazutaka Katoh, Kazuharu Misawa, Kei-ichi Kuma, Takashi Miyata, MAFFT: a novel  
766 method for rapid multiple sequence alignment based on fast Fourier transform,  
767 *Nucleic Acids Research*, Volume 30, Issue 14, 15 July 2002, Pages 3059–3066,  
768 <https://doi.org/10.1093/nar/gkf436>
- 769 2. Alexey M Kozlov, Diego Darriba, Tomáš Flouri, Benoit Morel, Alexandros Stamatakis,  
770 RAxML-NG: a fast, scalable and user-friendly tool for maximum likelihood  
771 phylogenetic inference, *Bioinformatics*, Volume 35, Issue 21, 1 November 2019,  
772 Pages 4453–4455, <https://doi.org/10.1093/bioinformatics/btz305>

773  
774  
775  
776  
777

## 778 3b) Y chromosome / Sex determination

779 Martin Sikora<sup>1</sup>

780  
781  
782  
783

<sup>1</sup>Lundbeck Foundation GeoGenetics Centre, GLOBE Institute, University of Copenhagen,  
Copenhagen, Denmark

## 784 Methods

785 We calculated the ratio of reads aligning to either of the sex chromosomes ( $R_Y$  statistic)<sup>1</sup> to  
786 determine genetic sex of the study individuals. Y chromosomes of inferred male individuals  
787 were further analysed using phylogenetic placement<sup>2</sup>. We built a reference phylogenetic tree  
788 of 1,244 male individuals from the 1000 Genomes project with *RAxML-NG*<sup>3</sup>, using the  
789 general time-reversible model including among-site rate heterogeneity and ascertainment  
790 correction (model GTR+G+ASC\_LEWIS). For each ancient sample, haploid genotypes given  
791 the positions and alleles in the reference panel were called using '*bcftools call*' (options '-C  
792 *alleles -ploidy 1 -i*'). The resulting genotypes were converted to fasta format and placed onto

793 the reference tree using *EPA-ng*<sup>2</sup>. Phylogenetic placements were processed and visualised  
794 using *gappa*<sup>4</sup>.

795

796 To convert phylogenetic placements into haplogroup calls, we assigned each branch of the  
797 reference phylogeny to its representing haplogroup, using SNP annotations from ISOGG  
798 (version 15.73). For each ancient sample, haplogroups were then called using the most  
799 basal branch accumulating 99% of the placement weights, obtained using the '*accumulate*'  
800 command in *gappa*.

801

802 For in-depth phylogenetic analyses of haplogroups I, R1, and Q, we compiled extended  
803 reference panels of high-coverage modern individuals belonging to those haplogroups from  
804 publicly available sources<sup>5-8</sup>. To increase resolution for the placement of ancient samples,  
805 we also included ancient individuals with Y chromosome coverage  $\geq 1.5X$  in the reference  
806 panels. For each haplogroup panel, we called haploid genotypes individually per sample  
807 using '*bcftools call*', setting genotypes with read depth  $< 2$  or quality score  $< 30$  to missing.  
808 Individual VCF files were then merged and filtered to retain only biallelic SNPs polymorphic  
809 in the reference panel. For each haplogroup reference panel, we built phylogenetic trees  
810 using *RAxML-NG* and performed phylogenetic placement as described above, restricting to  
811 target samples with  $> 0.1X$  coverage.

812

## 813 Results

### 814 Sex determination

815 We unambiguously determined genetic sex for all 317 study individuals (118 female, 199  
816 males; **Supplementary Table VII**). In a plot of normalised sequencing depth across the X and  
817 Y chromosomes, the final dataset individuals form two clearly separated clusters  
818 corresponding to XX and XY karyotypes (**Fig. S3b.1**). The exception is individual YGS-B-2,  
819 an Icelandic Viking Age individual previously found to carry an XXY karyotype<sup>9</sup>.

820

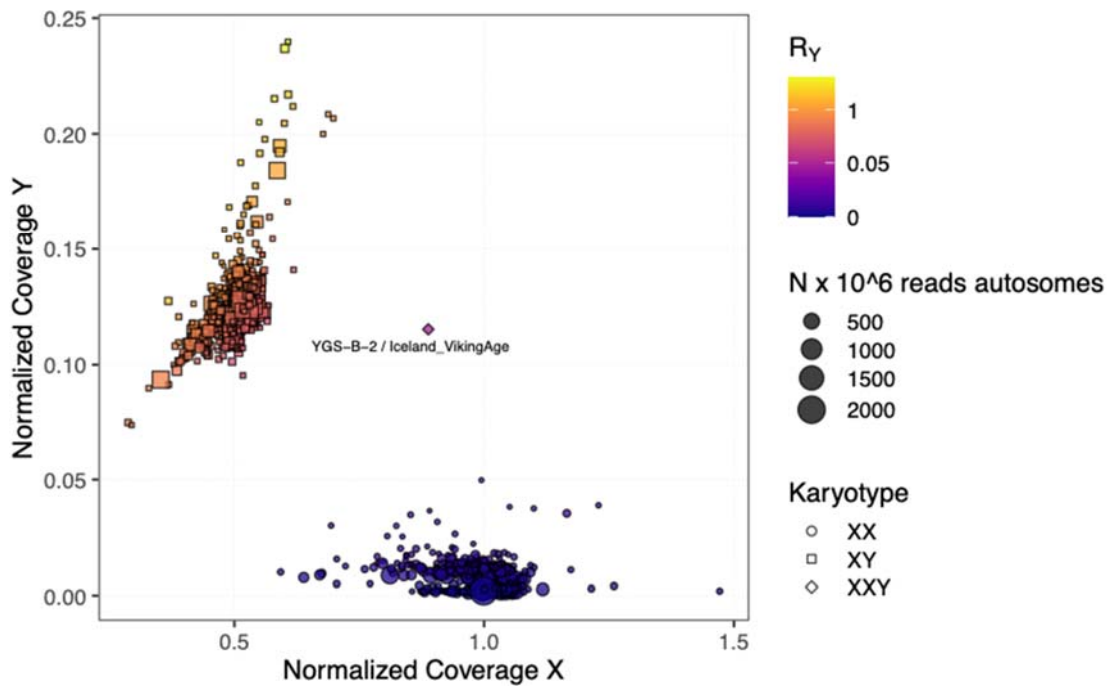

821

822 **Fig. S3b.1. Sex determination.** Plot shows coverage on X and Y chromosomes normalised  
823 by autosomal coverage, for each individual. Symbol color indicates  $R_Y$  ration values, and  
824 shape the inferred sex chromosome karyotype. Total number of autosomal reads are  
825 indicated by symbol size.

826

### 827 Phylogenetic placement

828 We used phylogenetic placement to analyse Y chromosome diversity in our dataset. For  
829 each ancient sample we obtain a distribution of placement weights across the reference  
830 phylogeny, hereby incorporating uncertainty in the placement due to low coverage. The  
831 placements can be subjected to analyses such as grafting as a pendant edge to the most  
832 likely placement, or clustering of multiple samples. As Y chromosome haplogroups are labels  
833 for clades of the phylogeny descending from specific ancestral branches, we can convert the  
834 placements into haplogroup calls for a specific sample by assigning haplogroup labels to  
835 each branch in the reference phylogeny, and finding the most basal branch that accumulates  
836 placement weights up to a specified threshold for the sample. We chose a conservative  
837 threshold of 0.99 for the weight accumulation; lower thresholds result in more derived  
838 haplogroup calls but with potentially higher uncertainty. **Fig. S3b.2** gives an example of this  
839 approach for NEO962, a Mesolithic individual from Denmark with low coverage of 0.036X.

840

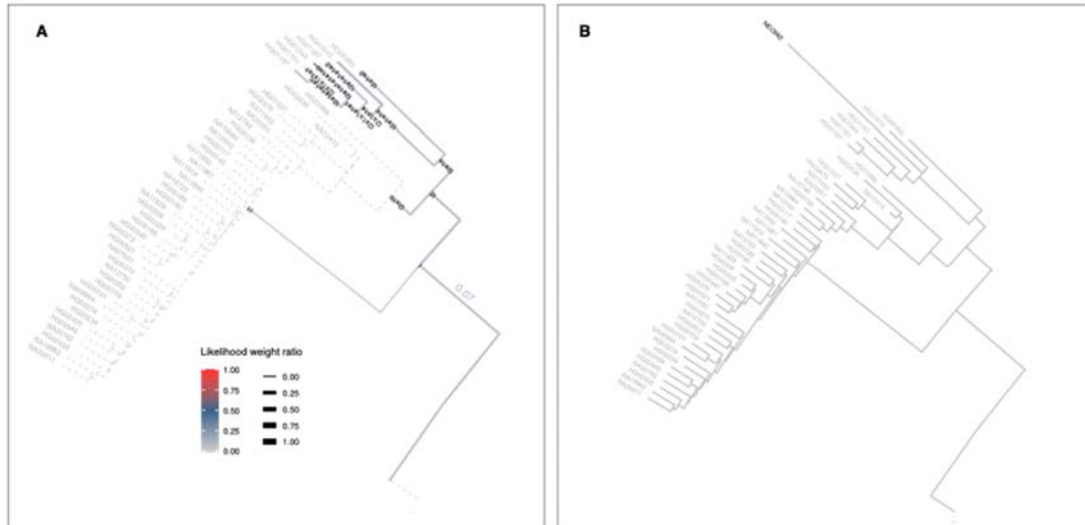

841  
 842 **Fig. S3b.2. Phylogenetic placement.** Plot showing phylogenetic placement weights (A) and  
 843 graft tree with most likely placement (B) for individual NEO962 on a subtree representing  
 844 reference individuals with haplogroup I. (A) Weights for individual branches are indicated  
 845 with edge colour and width, edges without placements are indicated with dashed line. While  
 846 the majority of the placement weight mass is distributed among branches of haplogroup I2,  
 847 non-zero weights are also found on branches ancestral to I1 (0.02) and I (0.07). The  
 848 individual is hence conservatively assigned to haplogroup I. (B) The most likely branching of  
 849 NEO962 was found within the subclade I2a1a1a, albeit this placement is associated with  
 850 considerable uncertainty.

851

## 852 Sub-haplogroup analyses of newly reported samples

853

### 854 Haplogroup I

855

856 Haplogroup I2 was common among newly reported samples from western Eurasian hunter-  
 857 gatherer contexts, as well as later Neolithic farmers. In particular, the 25 Danish Mesolithic  
 858 male individuals were exclusively carriers of haplogroup I2, albeit with considerable diversity  
 859 across different sub-haplogroups (Fig. S3b.3). Neolithic farmer individuals from Scandinavia  
 860 were predominantly placed within an ancient-only subclade of haplogroup I2a1a2, containing  
 861 other individuals from Neolithic farmer contexts across Europe.

862

863 The earliest presence of haplogroup I1, which is the most common haplogroup among  
 864 present-day Scandinavians, was found ~4,000BP among late Neolithic and early Bronze Age  
 865 Scandinavians newly reported in this study (Fig. S3b.3). A single Swedish Mesolithic

866 individual (sf11) was placed at the base of the I1 clade; however, its low coverage (0.1X)  
867 precludes to conclude with certainty whether early I1-related lineages were indeed present  
868 among Scandinavian hunter-gatherers.  
869

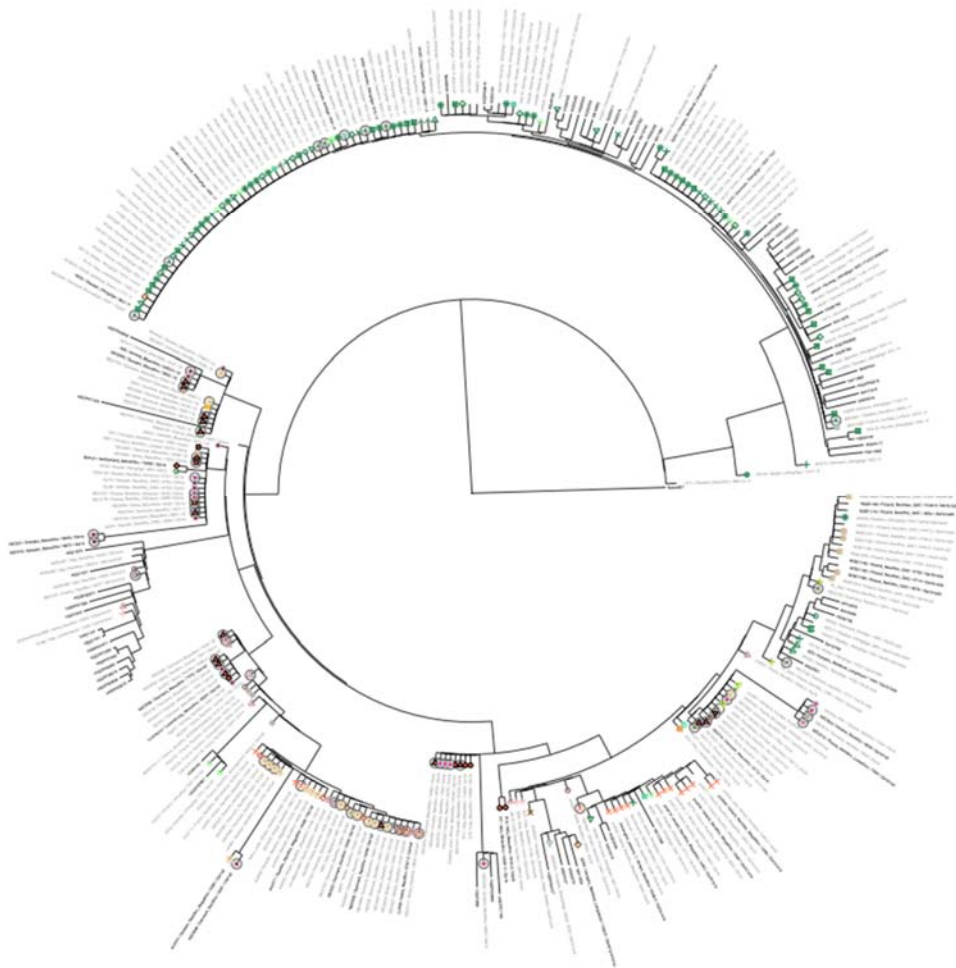

870  
871 **Fig. S3b.3. Phylogeny of haplogroup I.** Phylogenetic tree with most likely placements of  
872 ancient samples. Samples labelled with black colour were used to infer the reference tree,  
873 whereas samples with grey labels were grafted from phylogenetic placement. Terminal  
874 branches for ancient samples were shortened to aid visualisation. Symbol colours and  
875 shapes indicate genetic clusters from IBD-based clustering. Newly reported individuals are  
876 highlighted with circled symbols.

877

878 Haplogroup Q

879

880 Haplogroup Q1 was common among newly reported Neolithic hunter-gatherer individuals  
881 from the Siberian Forest steppe and the Lake Baikal region (Fig. S3b. 4). We observed  
882 haplogroup Q1b2, rare among ancient West Eurasians, in two Ukrainian hunter-gatherers  
883 (NEO501, NEO516) as well as two Danish Neolithic farmer individuals (NEO599, NEO744).

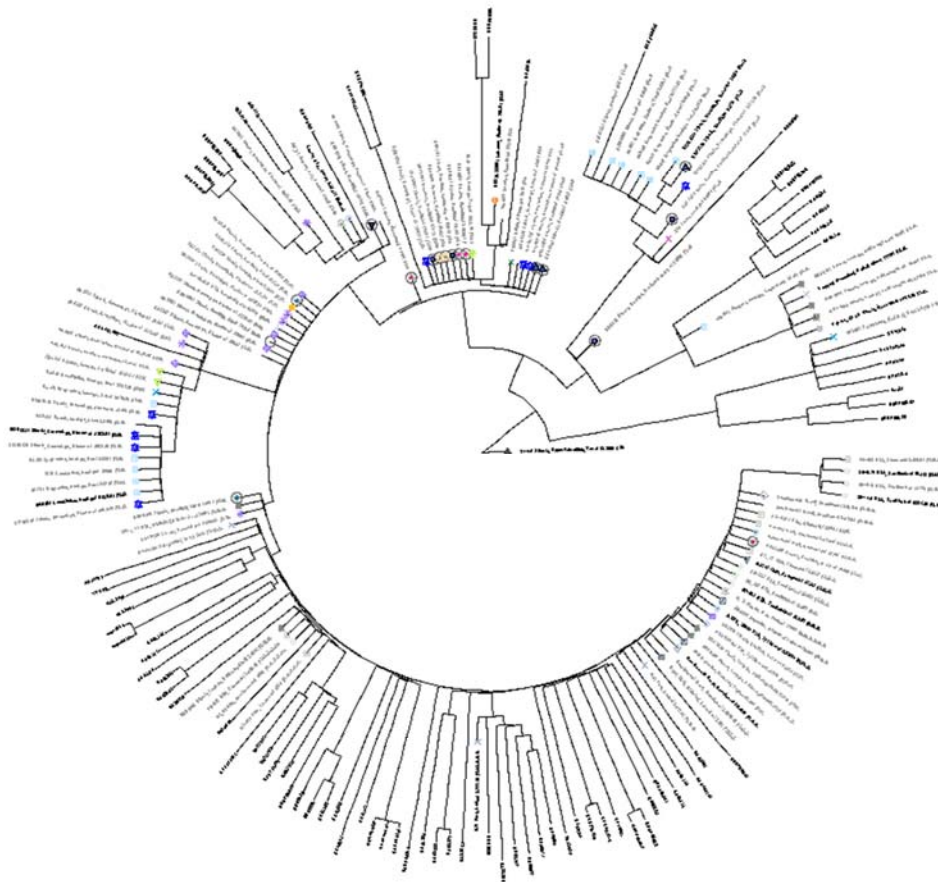

884  
885 **Fig. S3b.4.** Phylogeny of haplogroup Q. Phylogenetic tree with most likely placements of  
886 ancient samples. Samples labelled with black colour were used to infer the reference tree,  
887 whereas samples with grey labels were grafted from phylogenetic placement. Terminal  
888 branches for ancient samples were shortened to aid visualisation. Symbol colours and  
889 shapes indicate genetic clusters from IBD-based clustering. Newly reported individuals are  
890 highlighted with circled symbols.

891

892 Haplogroup R1a

893



894 Haplogroup R1a was found in the newly reported samples mainly among Eastern European  
895 hunter-gatherer individuals. Phylogenetic placement suggests that the oldest individuals from  
896 Mesolithic and Neolithic Russia represent early diverging lineages (Fig. S3b.5). Notably, a  
897 ~7,300-year-old Neolithic individual from the Middle Don region (NEO113) was placed in a  
898 basal R1a clade together with early individuals associated with the Corded Ware complex  
899 (poz81, RISE446), which would make it the earliest observation of this lineage reported to  
900 date.

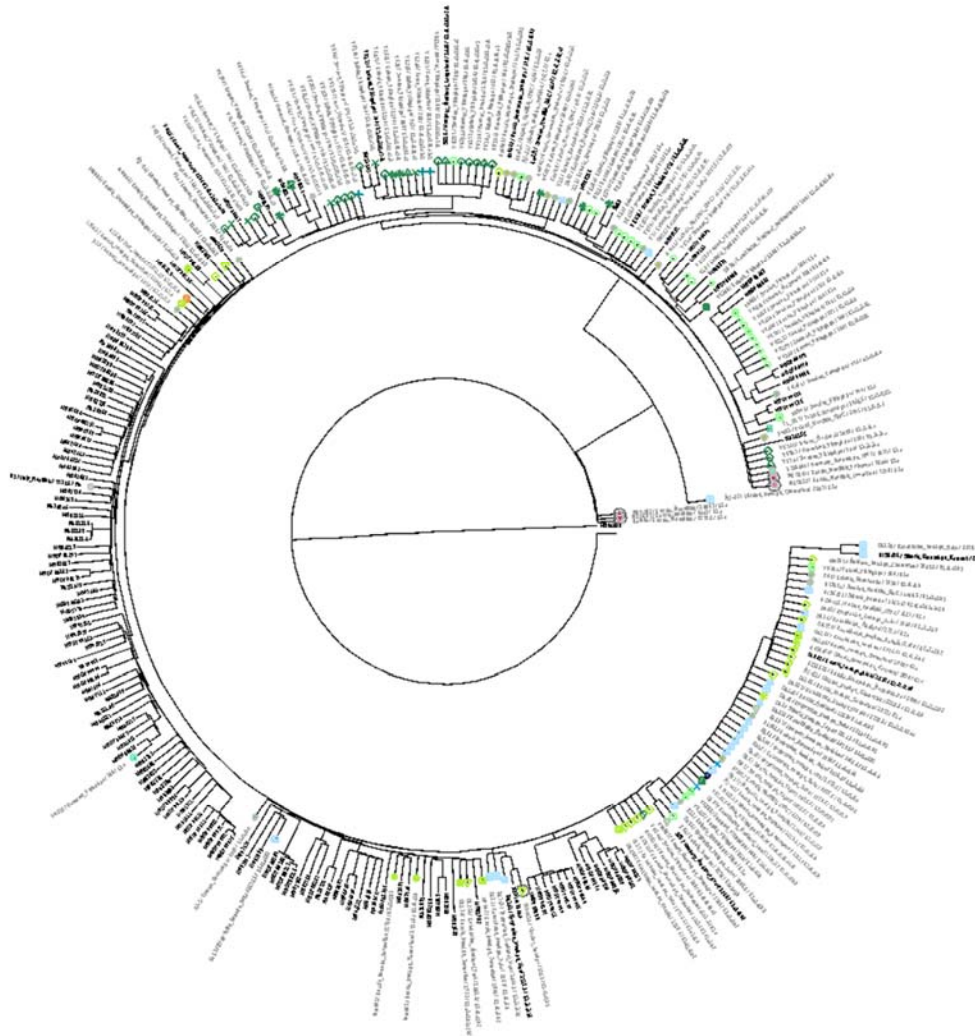

901  
902 **Fig. S3b.5. Phylogeny of haplogroup R1a.** Phylogenetic tree with most likely placements  
903 of ancient samples. Samples labelled with black colour were used to infer the reference tree,  
904 whereas samples with grey labels were grafted from phylogenetic placement. Terminal  
905 branches for ancient samples were shortened to aid visualisation. Symbol colours and  
906 shapes indicate genetic clusters from IBD-based clustering. Newly reported individuals are  
907 highlighted with circled symbols.  
908

909 Haplogroup R1b

910

911 Newly reported samples belonging to haplogroup R1b were distributed between two distinct  
912 groups depending on whether they formed part of the major European subclade R1b1a1b  
913 (R1b-M269). Individuals placed outside this subclade were predominantly from Eastern  
914 European Mesolithic and Neolithic contexts, and formed part of rare early diverging R1b  
915 lineages (Fig. S3b.6). Two Ukrainian individuals belonged to a subclade of R1b1b (R1b-V88)  
916 found among present-day Central and North Africans, lending further support<sup>5,10</sup> to an  
917 ancient Eastern European origin for this clade. Haplogroup R1b1a1a (R1b-M73) was  
918 frequent among Russian Neolithic individuals.

919

920 Individuals placed within the R1b-M269 clade on the other hand were from Scandinavian  
921 Late Neolithic and early Bronze Age contexts (Fig. S3b.6). Interestingly, more fine-scale sub-  
922 haplogroup placements of those individuals revealed that Y chromosome lineages  
923 distinguished samples from distinct genetic clusters inferred from autosomal IBD sharing  
924 (Fig. S3b.6, S3b.7). In particular, individuals associated with the Scandinavian cluster  
925 *Scandinavia\_4200BP\_3200BP* were all placed within the sub-haplogroup R1b1a1b1a1a1  
926 (R1b-U106), whereas the two Scandinavian males associated with the Western European  
927 cluster *Europe\_4500BP\_2000BP* were placed within R1b1a1b1a1a2 (R1b-P312) (Fig.  
928 S3b.7).

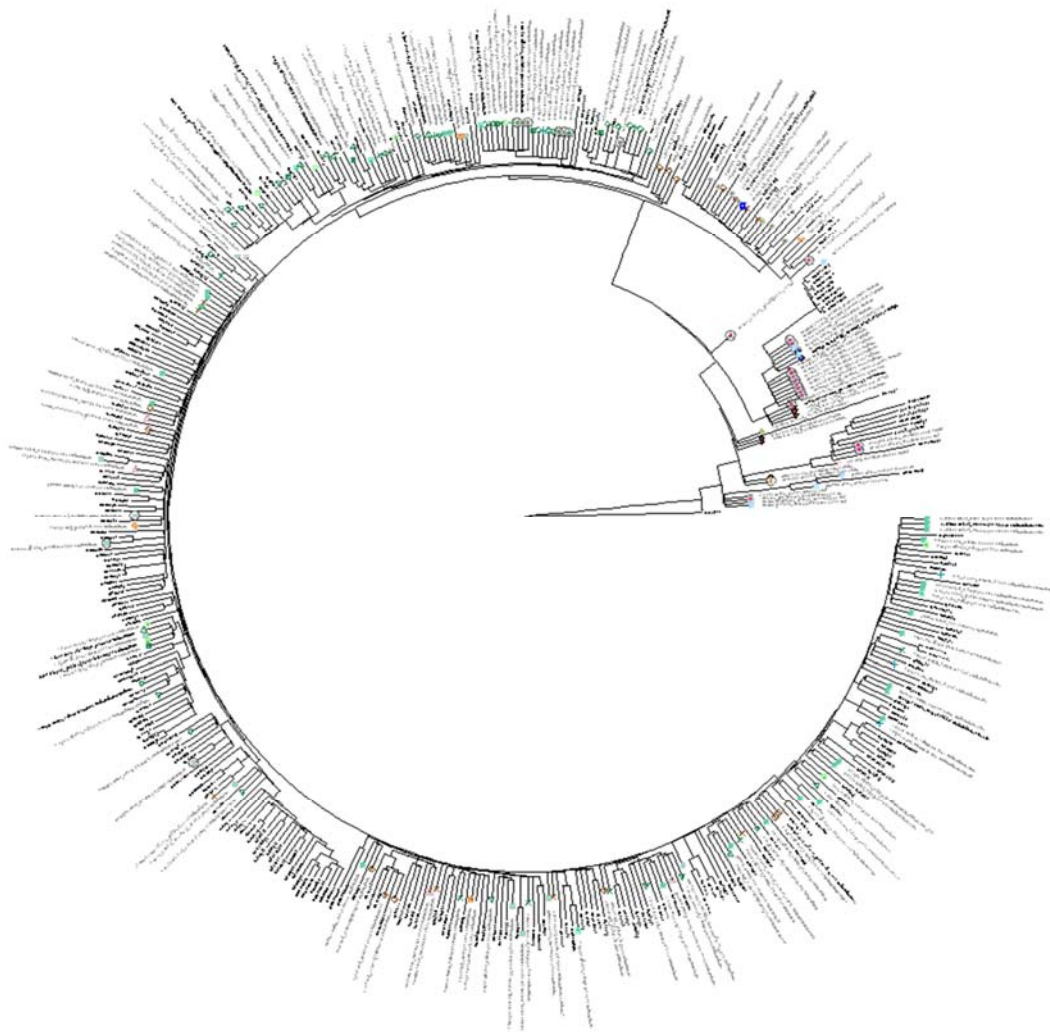

929

930 **Fig. S3b.6. Phylogeny of haplogroup R1b.** Phylogenetic tree with most likely placements  
 931 of ancient samples. Samples labelled with black colour were used to infer the reference tree,  
 932 whereas samples with grey labels were grafted from phylogenetic placement. Terminal  
 933 branches for ancient samples were shortened to aid visualisation. Symbol colours and  
 934 shapes indicate genetic clusters from IBD-based clustering. Newly reported individuals are  
 935 highlighted with circled symbols.

936

937

Scandinavia\_4200BP\_3200BP

Europe\_4500BP\_2000BP

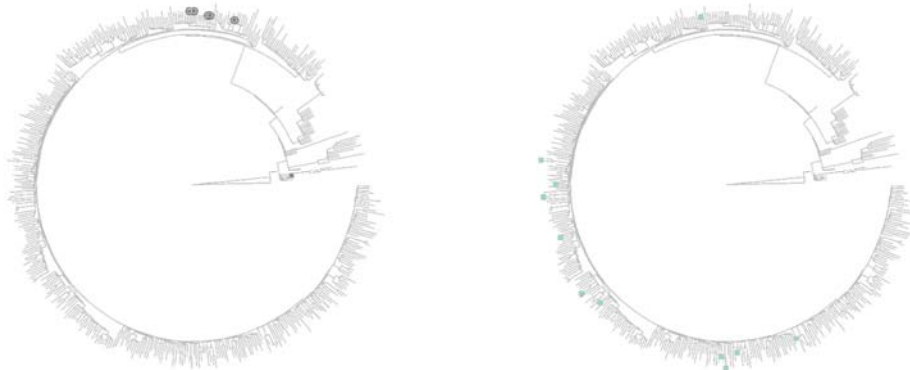

938

939 **Fig. S3b.7. Phylogeny of haplogroup R1b for genetic clusters.** Phylogenetic trees  
940 showing most likely placements of ancient samples from Danish Late Neolithic and Bronze  
941 Age genetic clusters Scandinavia\_4200BP\_3200BP (left) and Europe\_4500BP\_2000BP  
942 (right). Terminal branches for ancient samples were shortened to aid visualisation. Symbol  
943 colours and shapes indicate genetic clusters from IBD-based clustering. Newly reported  
944 individuals are highlighted with circled symbols.

## 945 References

946

- 947 1. Skoglund, P., Storå, J., Götherström, A. & Jakobsson, M. Accurate sex identification  
948 of ancient human remains using DNA shotgun sequencing. *J. Archaeol. Sci.* **40**, 4477–  
949 4482 (2013).
- 950 2. Barbera, P. *et al.* EPA-ng: Massively Parallel Evolutionary Placement of Genetic  
951 Sequences. *Syst. Biol.* **68**, 365–369 (2019).
- 952 3. Kozlov, A. M., Darriba, D., Flouri, T., Morel, B. & Stamatakis, A. RAXML-NG: a fast,  
953 scalable and user-friendly tool for maximum likelihood phylogenetic inference.  
954 *Bioinformatics* **35**, 4453–4455 (2019).
- 955 4. Czech, L., Barbera, P. & Stamatakis, A. Genesis and Gappa: processing, analyzing  
956 and visualizing phylogenetic (placement) data. *Bioinformatics* **36**, 3263–3265 (2020).
- 957 5. Haber, M. *et al.* Chad Genetic Diversity Reveals an African History Marked by  
958 Multiple Holocene Eurasian Migrations. *Am. J. Hum. Genet.* **0**, (2016).
- 959 6. Mallick, S. *et al.* The Simons Genome Diversity Project: 300 genomes from 142  
960 diverse populations. *Nature* **538**, 201–206 (2016).
- 961 7. Bergström, A. *et al.* Insights into human genetic variation and population history from  
962 929 diverse genomes. *Science* **367**, (2020).
- 963 8. Byrska-Bishop, M. *et al.* *High coverage whole genome sequencing of the expanded*  
964 *1000 Genomes Project cohort including 602 trios.* 2021.02.06.430068  
965 <https://www.biorxiv.org/content/10.1101/2021.02.06.430068v1> (2021)  
966 doi:10.1101/2021.02.06.430068.
- 967 9. Ebenesersdóttir, S. S. *et al.* Ancient genomes from Iceland reveal the making of a  
968 human population. *Science* **360**, 1028–1032 (2018).
- 969 10. Marcus, J. H. *et al.* Genetic history from the Middle Neolithic to present on the  
970 Mediterranean island of Sardinia. *Nat. Commun.* **11**, 1–14 (2020).

971

972

### 3c) Relatedness

973

Martin Sikora<sup>1</sup>

974

975 <sup>1</sup>Lundbeck Foundation GeoGenetics Centre, GLOBE Institute, University of Copenhagen,  
976 Copenhagen, Denmark

977

978

## 979 Methods

980 To infer genetic relatedness between the study individuals we used the allele-frequency free  
981 inference method introduced by Waples et al.<sup>1</sup>. For each pair of individuals, we calculated  
982 the three relatedness estimators R0, R1 and KING-robust<sup>2</sup> using the site-frequency-  
983 spectrum (SFS)-based approach. We used the *realSFS*<sup>3</sup> method implemented in the  
984 *ANGSD*<sup>4</sup> package to infer the 2D-SFS, selecting the SFS with the highest likelihood across  
985 ten replicates. We used a set of 1,191,529 autosomal transversion SNPs with minor allele  
986 frequency  $\geq 0.05$  from the 1000 Genomes Project<sup>5</sup> for the analysis.

987

988 We used previously established cut-offs<sup>2</sup> for the KING-robust estimator to assign individual  
989 pairs to first-, second- or third-degree relationships. Parent-offspring relationships were  
990 distinguished from sibling relationships using R0 and R1 ratios, by requiring that  $R0 \leq 0.02$   
991 and  $0.4 \leq R1 \leq 0.6$  to infer a parent-offspring relative pair. We excluded individual pairs with  
992 less than 20,000 sites contributing to the estimators.

993

## 994 Results

995 We detected a total of 92 close relative pairs among the 1,664 dataset individuals, including  
996 24 parent-offspring pairs, 36 siblings and 30 2<sup>nd</sup> degree pairs (Fig S3c.1, Supplementary  
997 Table VI). We further found evidence of two duplicate / monozygotic twin relationships.  
998 Sample NEO70 presented in this study was inferred to be from the same individual as  
999 RISE554 previously reported in Allentoft *et al*<sup>6</sup>. Additionally, two male individuals MJ-15 and  
1000 MJ-32 reported in Järve *et al*<sup>7</sup> were also inferred as duplicate/twin pairs. In both cases  
1001 genetic sex, mitochondrial as well as Y chromosome haplogroups were all consistent with  
1002 their inferred relatedness status.

1003

1004

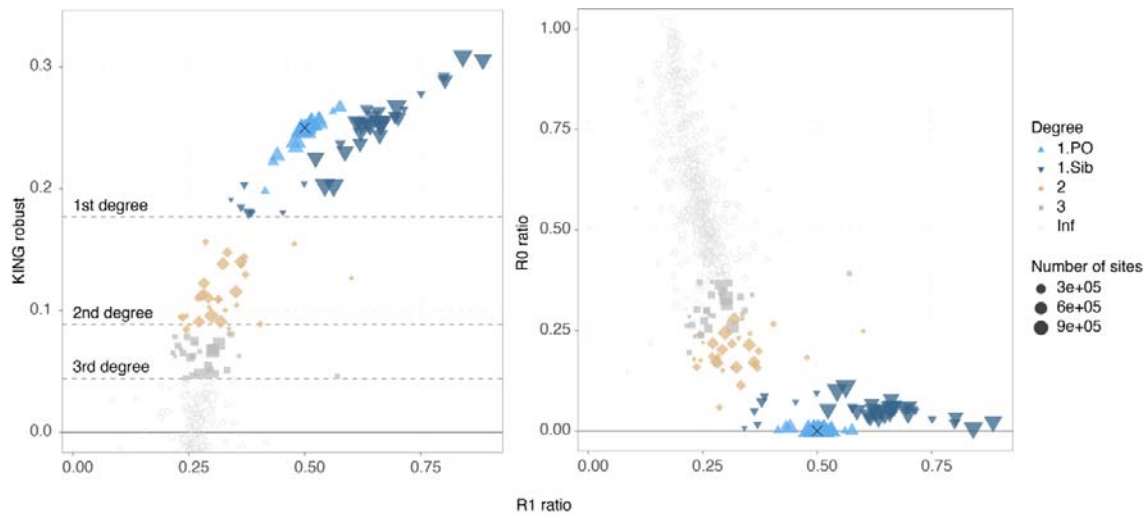

1005  
 1006  
 1007  
 1008  
 1009  
 1010

**Fig. S3c.1. Relatedness inference.** Plots showing relatedness estimators R1/KING-robust (left) and R1/R2 (right) for pairs of individuals. Inferred relatedness status for each pair is indicated by plot symbol and colour, with symbol size scaled by the total number of informative sites. Black crosses indicate expected values for parent-offspring relationships.

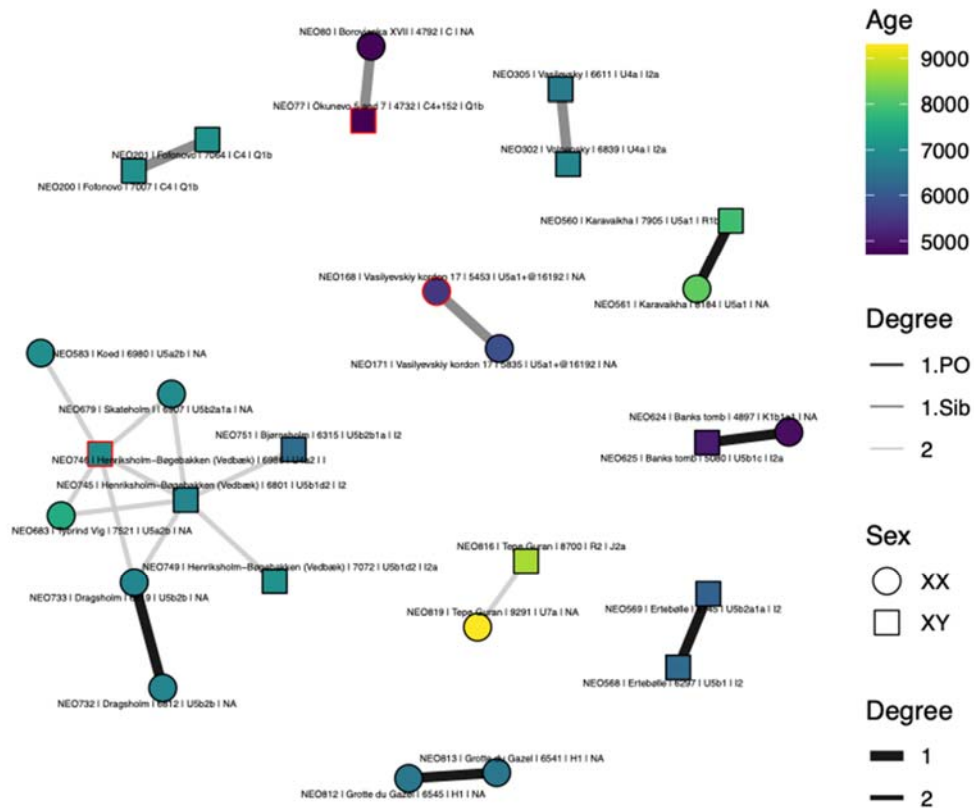

1011

1012 **Fig. S3c.2. Relatedness among newly reported individuals.** Network showing first and  
 1013 second-degree relationships, indicated by edge width and colour. Age of individuals is  
 1014 indicated by fill colour, and individuals are labelled with site name, age, mitochondrial and Y  
 1015 chromosome haplogroups. Individuals flagged for possible contamination are indicated in  
 1016 red.

1017

1018 We identified a total of 10 first- and 12 second-degree relative pairs among the newly  
 1019 reported individuals. However, inspection of the relatedness network revealed that the  
 1020 majority of 2<sup>nd</sup> degree connections are between Danish Mesolithic individuals from different  
 1021 sites and two individuals from Henriksholm (NEO745, NEO746), one of which was flagged  
 1022 as contaminated (**Fig. S3c.2**). As excess heterozygosity due to contamination can lead to  
 1023 artificially increased relatedness estimates, we excluded any pair involving those two  
 1024 individuals, as well as two other pairs involving contaminated individuals from the final list of  
 1025 close relatives (**Table S3c.1**). Finally, three individuals reported here were inferred to be  
 1026 either the same individual (2) or close relatives (1) of samples previously published using  
 1027 targeted SNP capture (**Table S3c.2**).

1028

1029

| Individual 1 | Individual 2 | Site                   | Country | Degree | Notes                                                      |
|--------------|--------------|------------------------|---------|--------|------------------------------------------------------------|
| NEO568       | NEO569       | Ertebølle              | Denmark | 1.PO   | NEO568 ("Ertebølle man") is the father of infant NEO569    |
| NEO732       | NEO733       | Dragsholm              | Denmark | 1.PO   | Mother-daughter relationship, direction unknown            |
| NEO624       | NEO625       | Banks tomb             | UK      | 1.PO   | NEO625 is the father of juvenile NEO624                    |
| NEO813       | NEO812       | Grotte du Gazel        | France  | 1.PO   | NEO813 is the mother of infant NEO812                      |
| NEO560       | NEO561       | Karavaikha             | Russia  | 1.PO   | NEO561 likely the mother of NEO560 (age and MT haplogroup) |
| NEO201       | NEO200       | Fofonovo               | Russia  | 1.Sib  |                                                            |
| NEO302       | NEO305       | Volnensky / Vasilevsky | Ukraine | 1.Sib  |                                                            |
| NEO816       | NEO819       | Tepe Guran             | Iran    | 2      |                                                            |

1030

1031 **Table S3c.1. Close relatives among newly reported individuals.**

1032

1033

| Study Individual | Related individual | Publication | Relationship |
|------------------|--------------------|-------------|--------------|
|------------------|--------------------|-------------|--------------|



|        |        |                                           |                                                      |
|--------|--------|-------------------------------------------|------------------------------------------------------|
| NEO73  | I1960  | Narasimhan et al 2019 Science             | same individual                                      |
| NEO669 | I5407  | Mathieson et al 2018 Nature               | same individual                                      |
| NEO60  | BOO005 | Lamnidis et al 2018 Nature Communications | first degree, infant NEO60 likely daughter of BOO005 |

1034

1035 **Table S3c.2. Study individuals with related published individuals.**

1036

## 1037 References

1038

1039 1. Waples, R. K., Albrechtsen, A. & Moltke, I. Allele frequency-free inference of close  
1040 familial relationships from genotypes or low-depth sequencing data. *Mol. Ecol.* **28**, 35–48  
1041 (2019).

1042 2. Manichaikul, A. *et al.* Robust relationship inference in genome-wide association  
1043 studies. *Bioinformatics* **26**, 2867–2873 (2010).

1044 3. Nielsen, R., Korneliussen, T., Albrechtsen, A., Li, Y. & Wang, J. SNP Calling,  
1045 Genotype Calling, and Sample Allele Frequency Estimation from New-Generation  
1046 Sequencing Data. *PLoS ONE* **7**, e37558 (2012).

1047 4. Korneliussen, T. S., Albrechtsen, A. & Nielsen, R. ANGSD: Analysis of Next  
1048 Generation Sequencing Data. *BMC Bioinformatics* **15**, 356 (2014).

1049 5. The 1000 Genomes Project Consortium,. A global reference for human genetic  
1050 variation. *Nature* **526**, 68–74 (2015).

1051 6. Allentoft, M. E. *et al.* Population genomics of Bronze Age Eurasia. *Nature* **522**, 167–+  
1052 (2015).

1053 7. Järve, M. *et al.* Shifts in the Genetic Landscape of the Western Eurasian Steppe  
1054 Associated with the Beginning and End of the Scythian Dominance. *Curr. Biol.* **29**, 2430-  
1055 2441.e10 (2019).

1056

## 1057 3d) Pop structure general, PCA/Admixture (Martin)

1058

Martin Sikora<sup>1</sup>

1059

1060 <sup>1</sup>Lundbeck Foundation GeoGenetics Centre, GLOBE Institute, University of Copenhagen,  
1061 Copenhagen, Denmark

1062

## 1063 Methods

1064

We generated a dataset for population genetic analysis by combining the 317 newly

1065

sequenced individuals with 1,347 previously published ancient genomes with genomic

1066 coverage >0.1X generated using shotgun sequencing (Supplementary Table VII). Imputed  
1067 genotype data (Supplementary note S2) for this set of 1,664 ancient genomes was merged  
1068 with genotypes of 2,504 modern individuals from the 1,000 Genomes project<sup>1</sup> used as a  
1069 reference panel in the imputation. We retained only SNPs passing the 1000 Genomes strict  
1070 mask, resulting in a final dataset of 4,168 individuals genotyped at 7,321,965 autosomal  
1071 SNPs (“1000G” dataset). In addition to imputed genotypes, we also generated pseudo-  
1072 haploid genotypes for each ancient individual by randomly sampling an allele from  
1073 sequencing reads covering those SNPs. For population structure analyses in the context of  
1074 global genetic diversity, we generated a second dataset by intersecting the ancient genotype  
1075 data with SNP array data of 2,180 modern individuals from 213 world-wide populations<sup>2-5</sup>  
1076 (“HO” dataset).

1077

1078 To facilitate filtering for downstream analyses, we flagged individuals to potentially exclude  
1079 based on the following criteria:

1080

- 1081 - Contamination estimate >5% (“*contMT5pct*”, “*contNuc5pct*”, Supplementary note S1)
- 1082 - Autosomal coverage < 0.1X (“*lowcov*”)
- 1083 - Genome-wide average imputation genotype probability < 0.98 (“*lowGpAvg*”)
- 1084 - Individual is the lower quality sample in a close relative pair (“*1d\_rel*”, “*2d\_rel*”;  
1085 Supplementary note S3c)

1086

1087 A total of 1,492 individuals (213 newly reported) passed all filters, which were used in the  
1088 majority of downstream analyses unless otherwise noted.

1089

1090 We investigated overall population structure among the dataset individuals using principal  
1091 component analyses (PCA) and model-based clustering (ADMIXTURE<sup>6</sup>). We carried out  
1092 PCA using different subsets of individuals in the “HO” dataset. For the PCA including only  
1093 imputed diploid samples, we used GCTA<sup>7</sup>, excluding SNPs with minor allele frequency  
1094 (MAF) < 0.05 in the respective panel. For PCA projecting low coverage or flagged  
1095 individuals, we used *smartpca*<sup>8</sup> with options ‘*lsqproject: YES*’ and ‘*autoshrink: YES*’ on a  
1096 fixed set of 400,186 SNPs with MAF ≥ 0.05 in non-African individuals passing all filters.

1097

1098 We ran *ADMIXTURE* on a set of 1,593 ancient individuals from the “1000G” dataset,  
1099 excluding individuals flagged as close relatives or a contamination estimate >5%. For the  
1100 1,492 individuals passing all filters we used imputed genotypes, the remaining 101 lower  
1101 coverage samples were represented by pseudo-haploid genotypes. We restricted the  
1102 analysis to transversion SNPs with imputation INFO score ≥ 0.8 and MAF ≥ 0.05. We further

1103 performed linkage disequilibrium (LD) pruning and filtering for missingness using *plink*<sup>9</sup>  
1104 (options '*--indep-pairwise 500 50 0.4 --geno 0.8*'), for a final analysis set of 142,550 SNPs.  
1105  
1106  
1107

1108 Results

1109 Comparison of imputed and pseudo-haploid genotypes in PCA space

1110 To determine the consistency of imputed and pseudo-haploid genotypes when used in PCA,  
1111 we followed the approach of Antonio *et al.*<sup>10</sup> comparing the coordinates of both sets of  
1112 genotypes for each individual when projected onto principal components inferred from  
1113 modern individuals (Fig. S3d.1, S3d.3). We did not use the “autoshrink” option of *smartpca*  
1114 for this analysis to avoid possible systematic differences in the projection correction between  
1115 the two sets of genotypes. Projected PCA positions for samples passing all filters were  
1116 consistent between imputed and pseudo-haploid genotypes, with no evidence for systematic  
1117 shifts (Fig. S3d.2, S3d.4) and only a very subtle relationship of PCA distance between  
1118 genotypes with genomic coverage (Fig. S3d.3, S3d.6). More substantial shifts were only  
1119 observed with low coverage (<0.1X) flagged samples.

1120  
1121  
1122

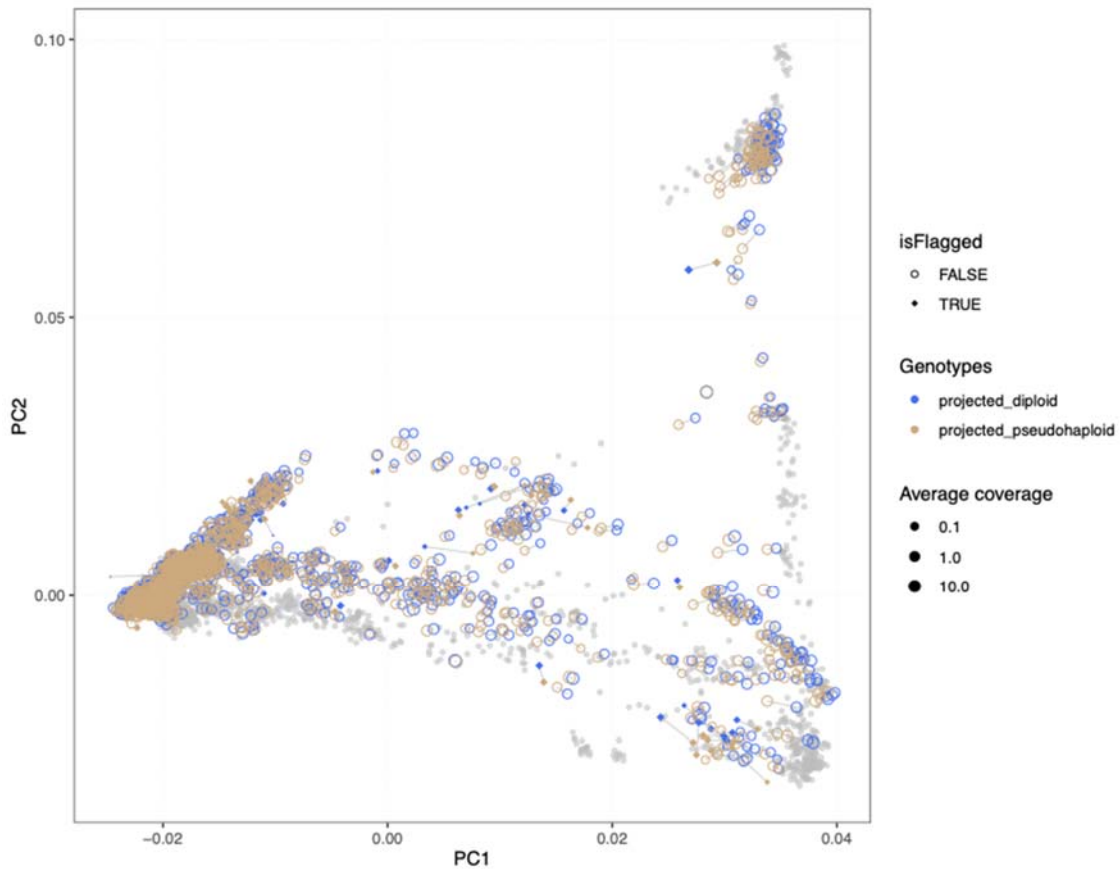

1123

1124 **Fig. S3d.1. PCA projection of imputed and pseudo-haploid genotypes.** Colored symbols

1125 show the position of imputed diploid (blue) and pseudo-haploid (beige) genotypes for each

1126 ancient individual, projected onto principal components inferred from modern individuals from  
1127 Eurasia, Oceania, and the Americas. Genotype pairs from the same individual are connected  
1128 by grey lines.  
1129

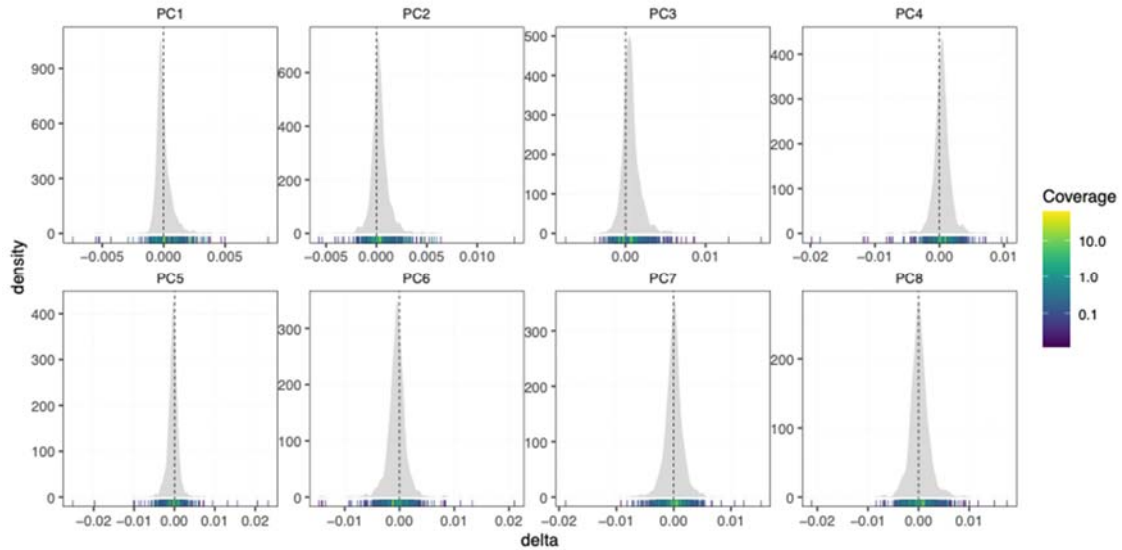

1130  
1131 **Fig. S3d.2.** Distribution of differences between genotypes in PC space. Density plots  
1132 show differences along individual PCs between imputed and pseudo-haploid genotypes for  
1133 each individual in Fig. S3d.1, as a function of their average read depth. Marginal rug plots  
1134 show individual observations, colored by the average read depth of the respective individual.  
1135

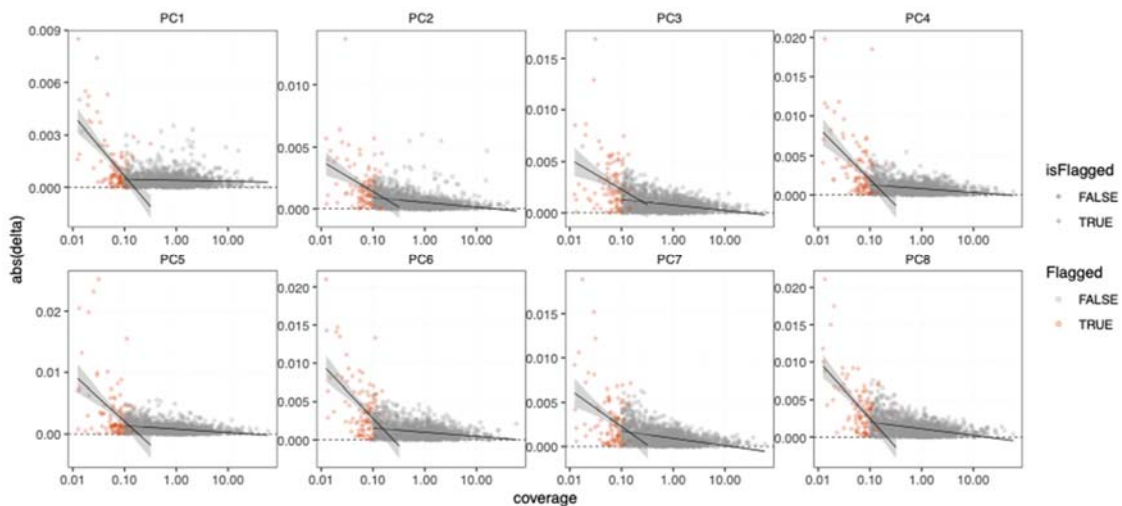

1136  
1137 **Fig. S3d.3.** Relationship of read depth and PCA position. Plot shows absolute value of  
1138 differences along individual PCs between imputed and pseudo-haploid genotypes for each  
1139 individual in Fig. S3d.1, as a function of their average read depth. Individuals flagged for low

1140 coverage or low GP average are indicated with red symbols. Linear regression lines for  
1141 flagged and unflagged individuals are shown with black lines.

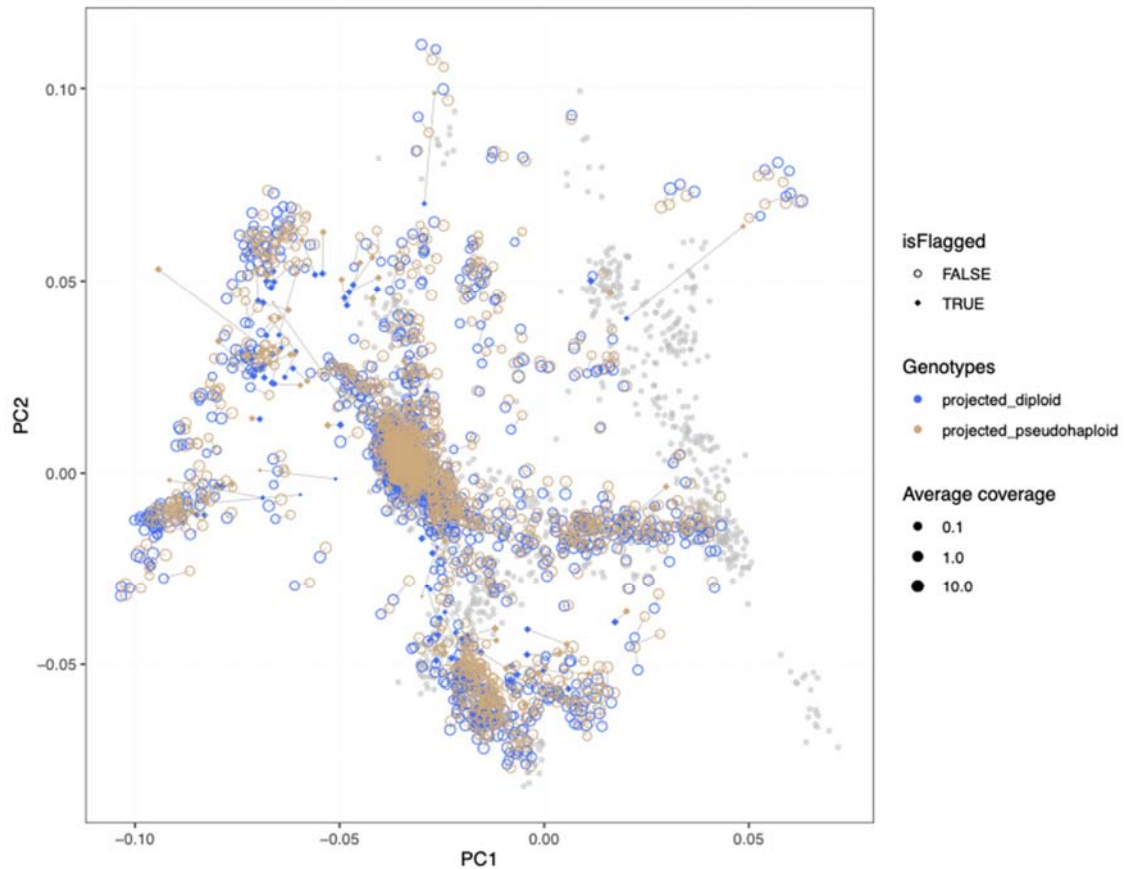

1142 **Fig. S3d.4. PCA projection of imputed and pseudo-haploid genotypes.** Colored symbols  
1143 show the position of imputed diploid (blue) and pseudo-haploid (beige) genotypes for each  
1144 ancient individual, projected onto principal components inferred from modern individuals from  
1145 Western Eurasia. Genotype pairs from the same individual are connected by grey lines.  
1146  
1147

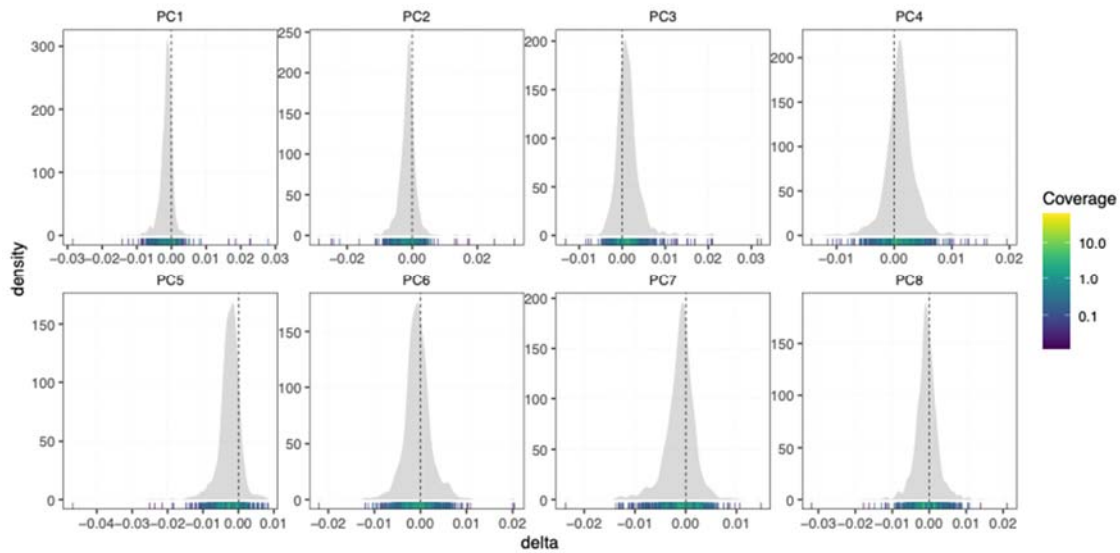

1148

1149 **Fig. S3d.5. Distribution of differences between genotypes in PC space.** Density plots  
 1150 show differences along individual PCs between imputed and pseudo-haploid genotypes for  
 1151 each individual in Fig. S3d.4, as a function of their average read depth. Marginal rug plots  
 1152 show individual observations, coloured by average read depth of the respective individual.

1153

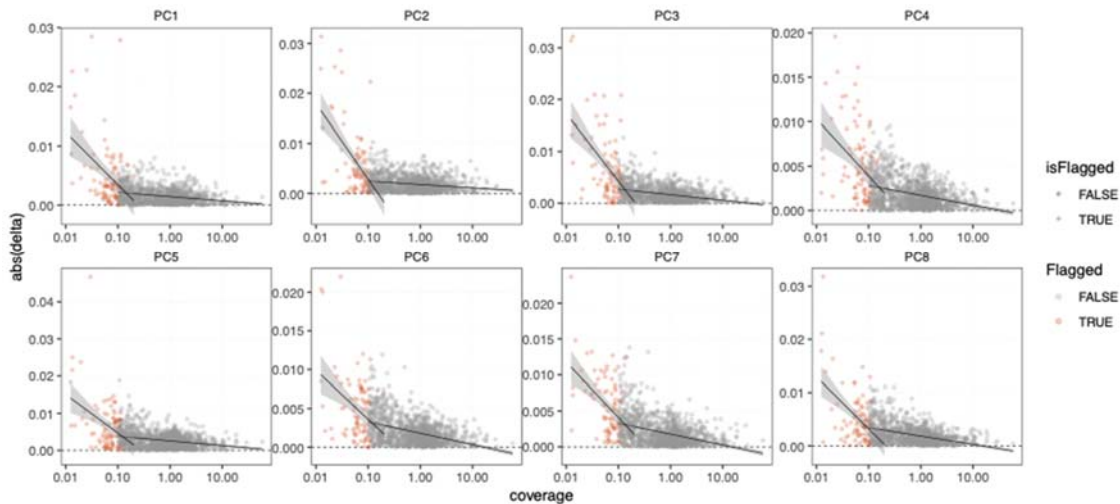

1154

1155 **Fig. S3d.6. Relationship of read depth and PCA position.** Plot shows absolute difference  
 1156 along individual PCs between imputed and pseudo-haploid genotypes for each individual in  
 1157 Fig. S3d.4, as a function of their average read depth. Individuals flagged for low coverage or  
 1158 low GP average are indicated with red symbols. Linear regression lines for flagged and  
 1159 unflagged individuals are shown with black lines.

1160

1161 PCA position of samples flagged as contaminated

1162 To investigate the effect of elevated contamination estimates on the position of individuals  
1163 flagged as possibly contaminated, we projected them onto the principal components inferred  
1164 from modern and ancient individuals passing all filters. We found that the majority of those  
1165 individuals projected consistently with ancient samples of related age and regional contexts  
1166 (Fig. S3d.7). An exception to this is seen in the Mesolithic Danish individual NEO1, which  
1167 shows a clear shift towards present-day Europeans along PC1 and PC2. Overall, our results  
1168 suggest that inferences about broad patterns of deep Eurasian population structure are likely  
1169 not affected in the majority of the flagged individuals. We nevertheless opted for a  
1170 conservative approach and excluded those individuals from in-depth analyses further  
1171 downstream.  
1172

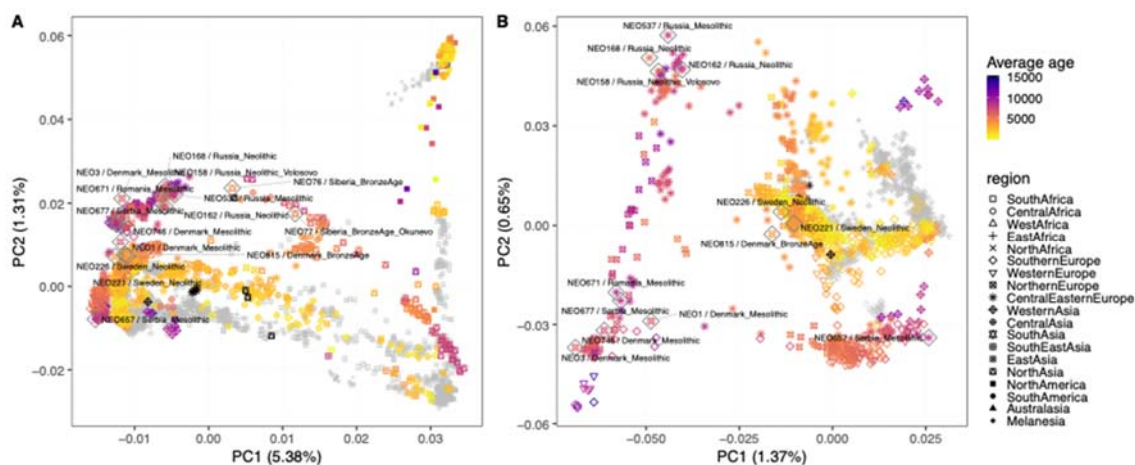

1173 **Fig. S3d.7. PCA positions of individuals flagged as contaminated.** Flagged individuals  
1174 are labelled and outlined with grey diamonds. Principal components were inferred using  
1175 ancient and modern individuals from (A) Eurasia, Oceania, and the Americas or (B) Western  
1176 Eurasia. Plot symbols indicate geographic region, coloured by age of the respective  
1177 individual. Present-day individuals are indicated in grey.

1179

1180



1181 Genetic ancestry of newly reported samples

1182 Overview

1183

1184

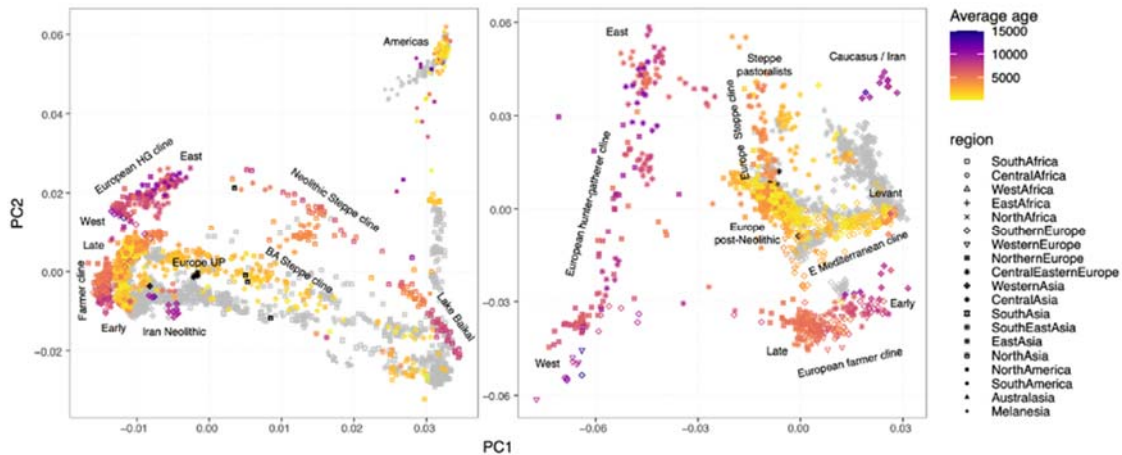

1185

1186 **Fig. S3d.8. Overview of genetic structure.** PCA of ancient and modern individuals from  
1187 Eurasia, Oceania, and the Americas (left), or Western Eurasia (right). Plot symbols indicate  
1188 geographic regions, colored by the age of the respective individual. Present-day individuals  
1189 are indicated in grey. Terms for spatiotemporal ancestry clusters and clines are indicated.

1190 Genetic structure in a PCA using 3,316 individuals from regions outside Africa is dominated  
1191 by continental-scale differentiation among western Eurasia (defined here as west of the  
1192 Urals), east Asia and the Americas (Fig S3d.8). Two west-east clines of ancient individuals  
1193 connect western and eastern Eurasia: A “Neolithic Steppe cline” between hunter-gatherers of  
1194 the West Siberian Forest Steppe and Lake Baikal; as well as a later “BA Steppe cline” linking  
1195 Western Steppe pastoralists with the Altai mountain region (Fig S3d.8).

1196 Focusing the PCA on 2,126 modern and ancient individuals from Western Eurasia, the  
1197 extremes of the PCA space are defined by clines and clusters related to previously described  
1198 “deep” ancestry sources, including: A “European hunter-gatherer cline” between western and  
1199 eastern European Mesolithic individuals; A “European farmer cline” ranging from early  
1200 Neolithic individuals from Anatolia and Southern Europe to mid- and late Neolithic European  
1201 individuals; and hunter-gatherers and early farmers from Iran and the Caucasus. European  
1202 individuals from the late Neolithic and early Bronze Age onwards form an extended  
1203 “European post-Neolithic” cluster in the centre of the PCA, differentiated along either a  
1204 “European Steppe cline” between Steppe pastoralists and late European farmers, or an  
1205 “Eastern Mediterranean cline” anchored in the east by Anatolian and Levantine Bronze Age  
1206 individuals (Fig S3d.8). The newly reported genomes from western Eurasia cluster across

1207 the entire range of the PCA, resulting in increased fine-scale resolution along the major  
1208 ancestry clines, particularly the European hunter-gatherer and farmer clines. The following  
1209 sections provide regional descriptions for the patterns of ancestry observed in the newly  
1210 reported samples.

1211

### 1212 Southern Europe

1213

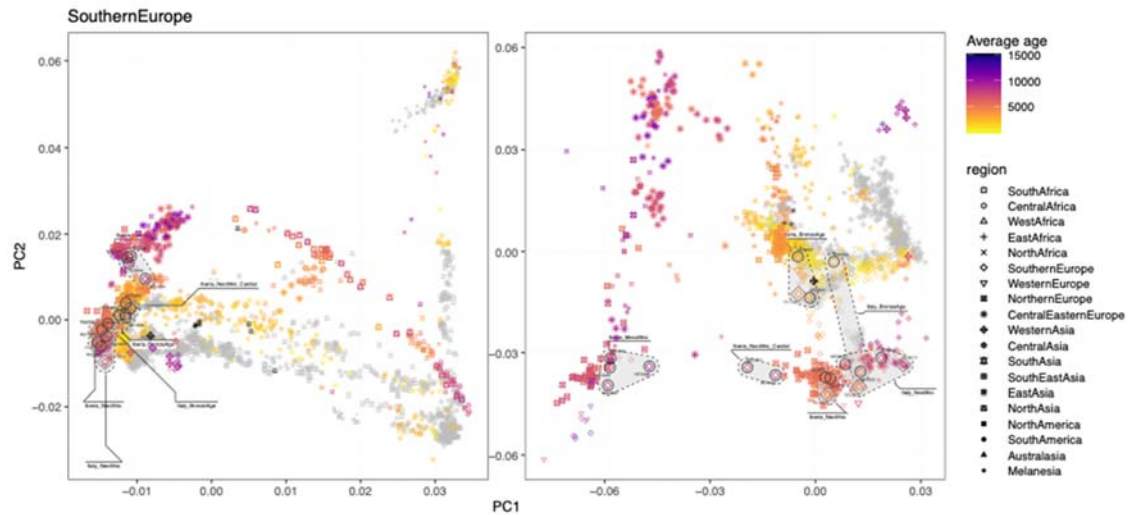

1214

1215 **Fig. S3d.9. Newly reported individuals from Southern Europe.** PCA positions of newly  
1216 reported individuals are highlighted with black circles (imputed) or grey diamonds (pseudo-  
1217 haploid, projected). Individuals from the same spatiotemporal group are connected with  
1218 shaded hulls.

1219

1220 We report 18 new individuals from Italy (6) and the Iberian Peninsula (12), distributed across  
1221 European hunter-gatherer (HG), farmer, and post-Neolithic ancestry clusters (Fig S3d.9).

1222 Four Iberian Mesolithic individuals cluster with other Southern European Mesolithic  
1223 individuals at the “western” end of the European HG cline. Among the individuals falling  
1224 within the European farmer cline, two early Neolithic individuals from Portugal (NEO631,  
1225 NOE632; ~ 7,300 BP) are shifted towards the European HG cline suggestive of increased  
1226 HG ancestry. The four most recent individuals (from ~4,100 BP) form part of the extended  
1227 European post-Neolithic cluster.

1228

### 1229 Western Europe

1230

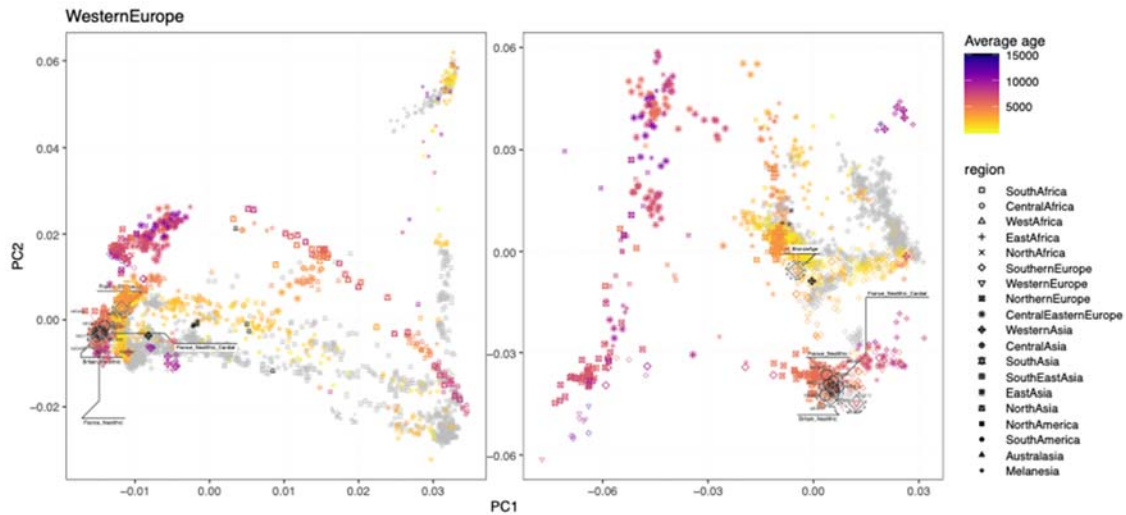

1231

1232 **Fig. S3d.10. Newly reported individuals from Western Europe.** PCA positions of newly  
 1233 reported individuals are highlighted with black circles (imputed) or grey diamonds (pseudo-  
 1234 haploid, projected). Individuals from the same spatiotemporal group are connected with  
 1235 shaded hulls.

1236

1237 We report 12 new individuals from France (5) and the UK (7), from the early Neolithic to the  
 1238 Bronze Age. All 11 Neolithic individuals fall within the European farmer cline, whereas a  
 1239 single Bronze Age individual from Grotte Mandrin (NEO120, ~3,400BP) clustered with post-  
 1240 Neolithic Europeans (Fig. S3d.10).

1241

1242 Northern Europe

1243

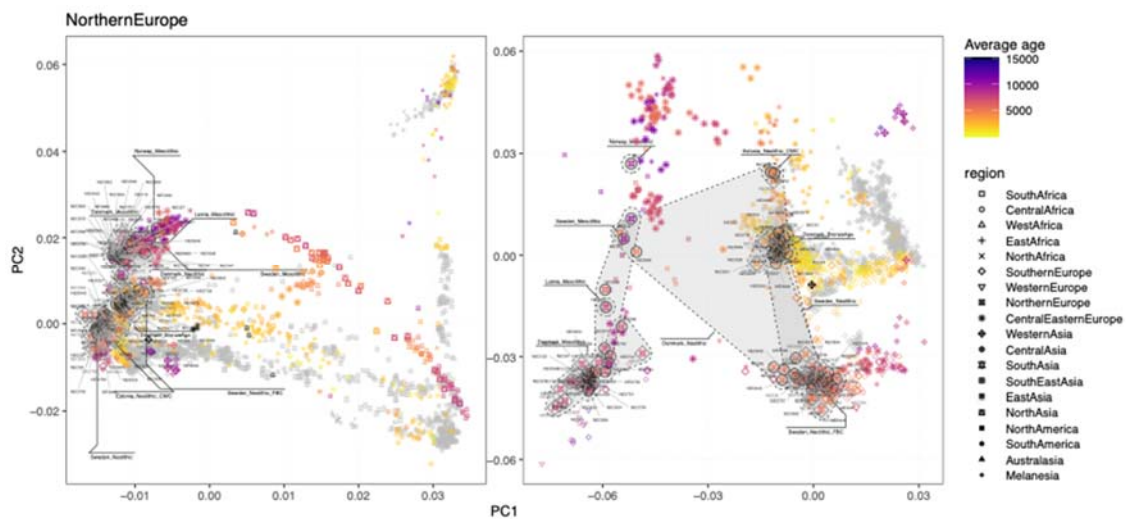

1244

1245 **Fig. S3d.11. Newly reported individuals from Northern Europe.** PCA positions of newly  
 1246 reported individuals are highlighted with black circles (imputed) or grey diamonds (pseudo-

1247 haploid, projected). Individuals from the same spatiotemporal group are connected with  
1248 shaded hulls.

1249

1250 We report 124 new individuals from Denmark (100), Sweden (21), Norway (1) and the Baltic  
1251 (2), spanning a period from ~10,500BP to 3,100BP. This transect includes 46 Mesolithic  
1252 individuals, all of which cluster within the European HG cline (Fig. S3d.10). The 40 HG  
1253 individuals from Denmark fall towards the “western” end of the cline, whereas the other  
1254 Scandinavian and Baltic individuals occupy varied positions shifted towards the “eastern”  
1255 end of the cline. Neolithic Scandinavian individuals generally fall towards the “late” end of the  
1256 European farmer cline, with later Neolithic individuals also found among the extended post-  
1257 Neolithic Europe cluster. Three late Neolithic (~4,500BP) individuals from Denmark  
1258 (NEO876, NEO792) and Estonia (NEO306) are shifted further up along PC2 towards the  
1259 Steppe pastoralist cluster, suggesting higher amounts of Steppe-related ancestry (Fig.  
1260 S3d.11).

1261

1262 Central and Eastern Europe

1263

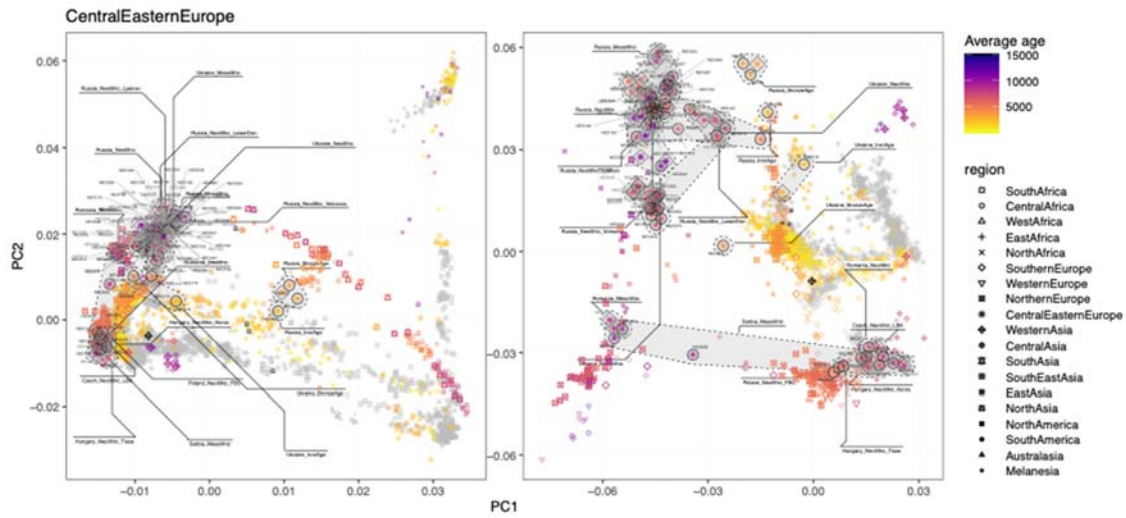

1264

1265 **Fig. S3d.12. Newly reported individuals from Southern Europe.** PCA positions of newly  
1266 reported individuals are highlighted with black circles (imputed) or grey diamonds (pseudo-  
1267 haploid, projected). Individuals from the same spatiotemporal group are connected with  
1268 shaded hulls.

1269

1270 We report 112 new individuals from Central and Eastern Europe, falling into two distinct  
1271 groups. The 92 individuals from Russia (57) and Ukraine (35) predominantly occupy a broad  
1272 area between the centre and “eastern” end of the European HG cline, roughly corresponding  
1273 to a geographic cline from the south (Ukraine) to the north (Russia) (Fig. S3d.11). Among the  
1274 southern Russian samples, six individuals from Golubaya Krinitsa in the Middle Don region  
1275 are shifted on a cline along PC1 towards Iranian and Caucasus Mesolithic and Neolithic at  
1276 the other extreme, falling close to later Steppe pastoralists from the region. Three Bronze  
1277 Age individuals from Northwestern Russia (Bol'shoy Oleni Ostrov; NEO60, NEO61, NEO62)  
1278 are positioned between the Neolithic and BA Steppe clines, centrally between the West and  
1279 East Eurasian poles in the extended PCA of all non-Africans (Fig. S3d.12).

1280

1281 The remaining 20 samples from Central and Southeastern Europe include Mesolithic  
1282 individuals at the “western” end of the European HG cline, as well as early Neolithic  
1283 individuals on the farmer cline. An early Neolithic individual from Iron Gates, Serbia  
1284 (NEO658) is found intermediate between the HG and farmer clines, suggestive of recent  
1285 farmer/HG admixture (Fig. S3d.12).

1286

1287 Western Asia

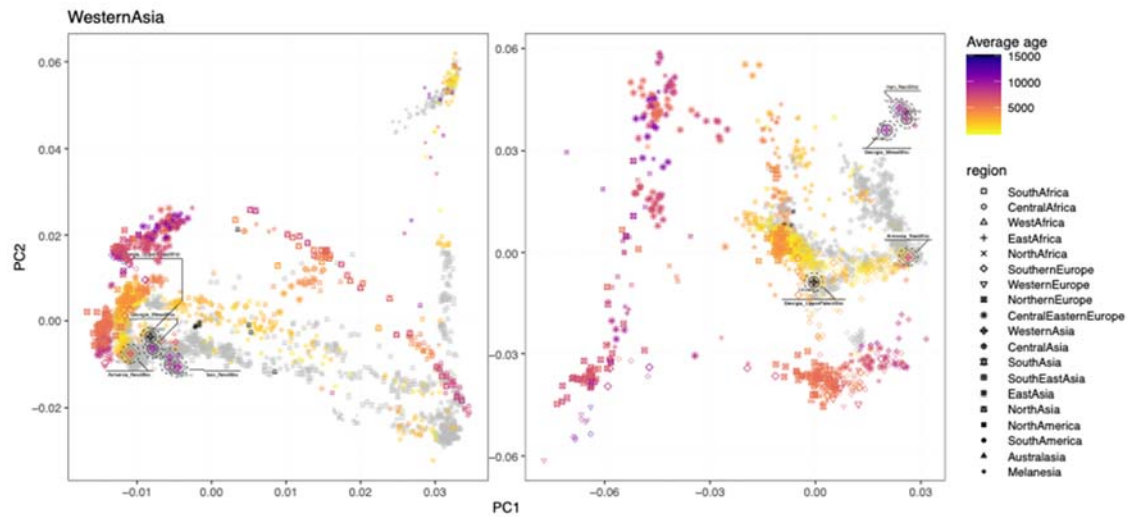

1289

1290

**Fig. S3d.13. Newly reported individuals from Western Asia.** PCA positions of newly

1291

reported individuals are highlighted with black circles (imputed) or grey diamonds (pseudo-

1292

haploid, projected). Individuals from the same spatiotemporal group are connected with

1293

shaded hulls.

1294

1295

We report 6 new individuals from Iran (3) and the South Caucasus region (3). The oldest

1296

sample in the dataset, a ~25,000-year-old individual from Georgia is positioned intermediate

1297

between Upper Paleolithic Europeans and early Neolithic farmers in both the west Eurasian

1298

and extended non-African PCA (**Fig. S3d.13**).

1299

Three Iranian Neolithic individuals (~9,200 BP) as well as one Mesolithic Georgian individual (NEO281; ~9,700 BP) fall with other previously

1300

published samples of similar provenance, defining one of the extremes of PC1/PC2 space.

1301

One Neolithic individual from Armenia (NEO110, ~7,600 BP) is found at the “eastern”

1302

extreme of an eastern Mediterranean cline between ancient Levantine individuals and

1303

Southern post-Neolithic Europeans.

1304

1305

Central Asia

1306

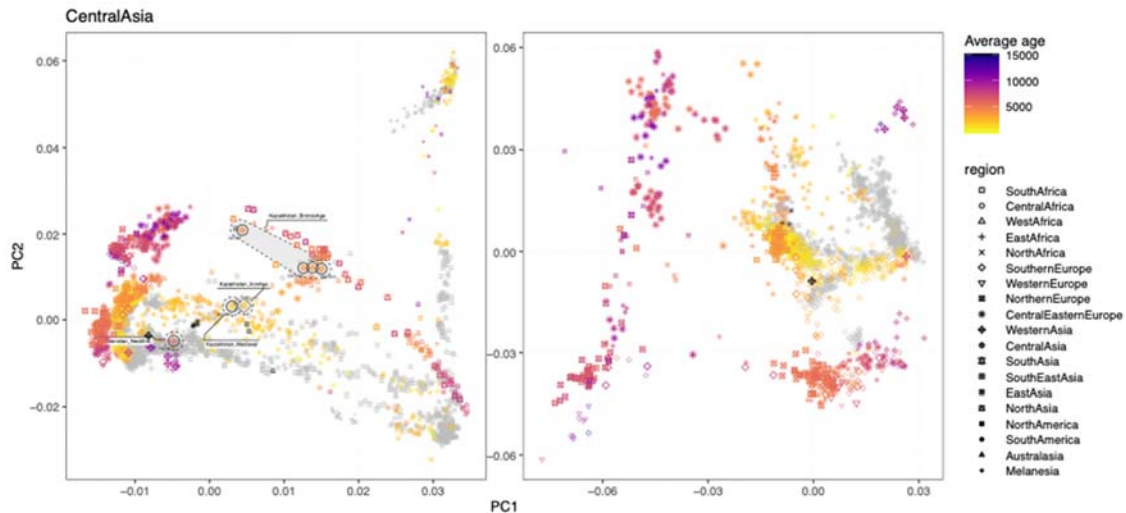

1307

1308 **Fig. S3d.14. Newly reported individuals from Central Asia.** PCA positions of newly  
 1309 reported individuals are highlighted with black circles (imputed) or grey diamonds (pseudo-  
 1310 haploid, projected). Individuals from the same spatiotemporal group are connected with  
 1311 shaded hulls.

1312 We report 7 new individuals from Kazakhstan (6) and Turkmenistan (1). The Neolithic  
 1313 individual from Turkmenistan (~6,500 BP) clusters close to Neolithic Iranians. The individuals  
 1314 from Kazakhstan are more recent (~4,500BP – 2,000BP), with the older individuals forming  
 1315 part of the Neolithic Steppe cline, and the younger individuals along the BA Steppe cline  
 1316 (Fig. S3d.14).

1317

1318 North Asia

1319

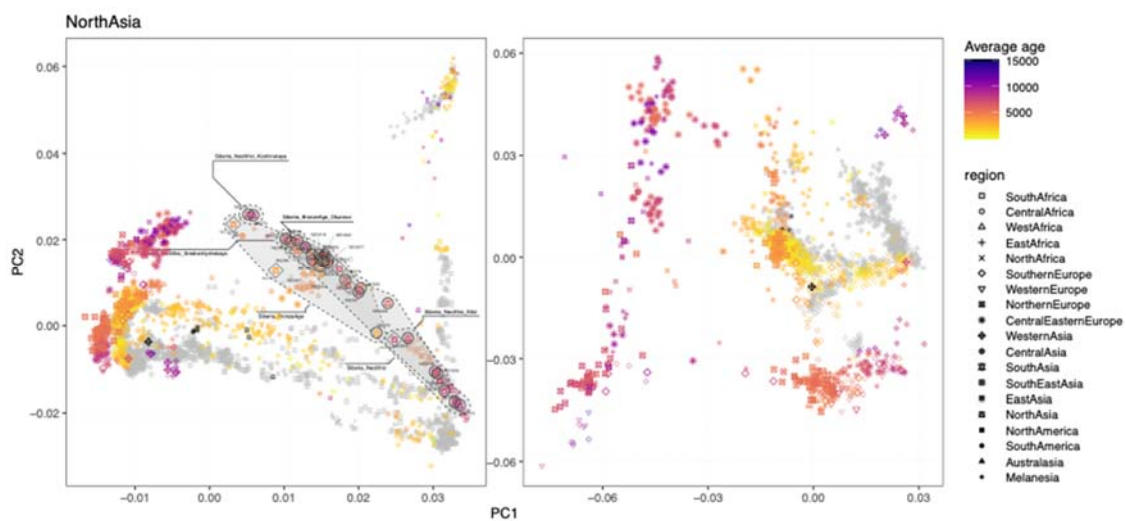

1320

1321 **Fig. S3d.15. Newly reported individuals from North Asia.** PCA positions of newly  
 1322 reported individuals are highlighted with black circles (imputed) or grey diamonds (pseudo-

1323 haploid, projected). Individuals from the same spatiotemporal group are connected with  
1324 shaded hulls.

1325

1326 We report 38 new individuals from Western Siberia and Lake Baikal, spanning a period from  
1327 ~8,300BP to 2,800 BP. The individuals fall along the entire range of the Neolithic Steppe  
1328 cline, spanning from early Forest Steppe hunter-gatherers at the “western” end (NEO72,  
1329 NEO73) to Lake Baikal hunter-gatherers at the “eastern” end (Fig. S3d.15)

## 1330 References

- 1331 1. The 1000 Genomes Project Consortium,. A global reference for human genetic  
1332 variation. *Nature* **526**, 68–74 (2015).
- 1333 2. Patterson, N. *et al.* Ancient Admixture in Human History. *Genetics* **192**, 1065–1093  
1334 (2012).
- 1335 3. Lazaridis, I. *et al.* Ancient human genomes suggest three ancestral populations for  
1336 present-day Europeans. *Nature* **513**, 409–413 (2014).
- 1337 4. Lazaridis, I. *et al.* Genomic insights into the origin of farming in the ancient Near East.  
1338 *Nature* **536**, 419–424 (2016).
- 1339 5. Pickrell, J. K. *et al.* The genetic prehistory of southern Africa. *Nat. Commun.* **3**, 1143  
1340 (2012).
- 1341 6. Shringarpure, S. S., Bustamante, C. D., Lange, K. & Alexander, D. H. Efficient  
1342 analysis of large datasets and sex bias with ADMIXTURE. *BMC Bioinformatics* **17**, 218  
1343 (2016).
- 1344 7. Yang, J., Lee, S. H., Goddard, M. E. & Visscher, P. M. GCTA: A Tool for Genome-  
1345 wide Complex Trait Analysis. *Am. J. Hum. Genet.* **88**, 76–82 (2011).
- 1346 8. Patterson, N., Price, A. L. & Reich, D. Population Structure and Eigenanalysis. *PLoS*  
1347 *Genet* **2**, e190 (2006).
- 1348 9. Chang, C. C. *et al.* Second-generation PLINK: rising to the challenge of larger and  
1349 richer datasets. *GigaScience* **4**, 7 (2015).
- 1350 10. Antonio, M. L. *et al.* Ancient Rome: A genetic crossroads of Europe and the  
1351 Mediterranean. *Science* **366**, 708–714 (2019).

1352

1353

1354



1355  
1356  
1357  
1358  
1359  
1360  
1361  
1362

### 3e) Inferring the spatiotemporal spread of population movements in the past 13 millennia

Fernando Racimo<sup>1</sup>

<sup>1</sup>Lundbeck Foundation GeoGenetics Centre, GLOBE Institute, University of Copenhagen, Copenhagen, Denmark

#### 1363 Introduction

1364 We aimed to infer the geographic and temporal spread of major population movements in the  
1365 past 13 millennia of Western Eurasian history. We used a method developed in <sup>1</sup>, which uses  
1366 spatiotemporal ordinary kriging on latent ancestry proportion estimates from ancient and  
1367 present-day genomes. This way, we obtained detailed spatiotemporal maps reflecting the  
1368 dynamics of the spread of ancestry during the transition from the Mesolithic to the Neolithic,  
1369 Bronze Age, Iron Age and more recent periods, finally resulting in the complex ancestry  
1370 make-up of present-day populations in the region.

#### 1371 Methods

1372 We obtained ancestry proportions estimated using Admixture<sup>2</sup> with K=9 latent ancestry  
1373 clusters ([Supplementary Note S3d](#)) on a sequence dataset including both whole-genome  
1374 shotgun-sequenced genomes and genomic sequences obtained via SNP capture, after  
1375 imputation ([Supplementary Note S2](#)). We performed spatiotemporal kriging<sup>3</sup> of these  
1376 proportions over the last 12,900 years, in intervals of 300 years, with a 5,000-point spatial  
1377 grid spanning Western and Central Eurasia. We used the R package *gstat* to fit a  
1378 spatiotemporal variogram via a metric covariance model, and perform ordinary kriging<sup>4</sup>. We  
1379 focused on the ancestry clusters for which we could fit variogram models that were not static  
1380 over time.

#### 1381 Results

1382 We were able to fit spatiotemporal variogram functions to six of the nine ancestries. We label  
1383 these as WHG, EHG, IRN, LVN, SIB and EAS. The first four are roughly maximised in  
1384 Mesolithic western European hunter-gatherers, Mesolithic eastern European hunter-  
1385 gatherers, Iranian Neolithic populations, Levant Neolithic populations and ancient Siberian  
1386 populations, respectively (see <sup>5</sup> for a model positing the first four of these populations as the  
1387 major sources of ancestry in present-day Europeans). We depict the spatiotemporal spread

1388 of the first four of these ancestries in Fig. S3e.1 and Supplementary Animations 1-4. The fifth  
1389 ancestry (SIB) occurs at much lower rates in western Eurasia, and rises in frequency in  
1390 northeastern Europe during the Iron Age (Fig. S3e.2, Supplementary Animation 5)<sup>6-8</sup>. A sixth  
1391 ancestry (EAS) has affinities to East Asians, and expands into the Caucasus in recent times  
1392 (Fig. S3e.2, Supplementary Animation 6).

1393 These spatiotemporal maps evince interesting patterns of ancestry change across the  
1394 landscape. For example, the advancement of Neolithic Levant (LVN) ancestry appears  
1395 staggered: we observe different periods of advancement followed by stasis. In addition to the  
1396 Bronze Age movement of EHG ancestry, there is a southern incursion of IRN ancestry via  
1397 South Europe<sup>9-11</sup>. This is particularly obvious in Bronze Age Greek and Iron Age Roman  
1398 samples, and may be due to contacts with Anatolia and Northern Africa (where this ancestry  
1399 is also present). Additionally, we observe small incursions of very late SIB ancestry into  
1400 Eastern Europe (Fig. S3e.2 Supplementary Animation 5). This signal is driven by the  
1401 presence of SIB ancestry in Iron Age Cimmerian nomads<sup>12</sup> and in a medieval Serbian<sup>13</sup>, and  
1402 could perhaps be linked to the introduction of languages from the Finno-Ugric family into the  
1403 Hungarian Plain. An incursion of this ancestry into Western Eurasia can also be seen in  
1404 Medieval Ottoman Anatolians<sup>14</sup>.

1405 We can focus on local timelines of kriged ancestry changes in different points of the map  
1406 (Fig. S3e.3). Here, we observe that the timing and duration of the rise in LVN ancestry was  
1407 different in different points in Europe (Fig. S3e.3). We also observe that, in certain regions of  
1408 Europe, the rise in IRN and EHG ancestry are largely decoupled from each other (see e.g.  
1409 "Rome" in Fig. S3e.2)<sup>9-11,15</sup>.

1410

1411

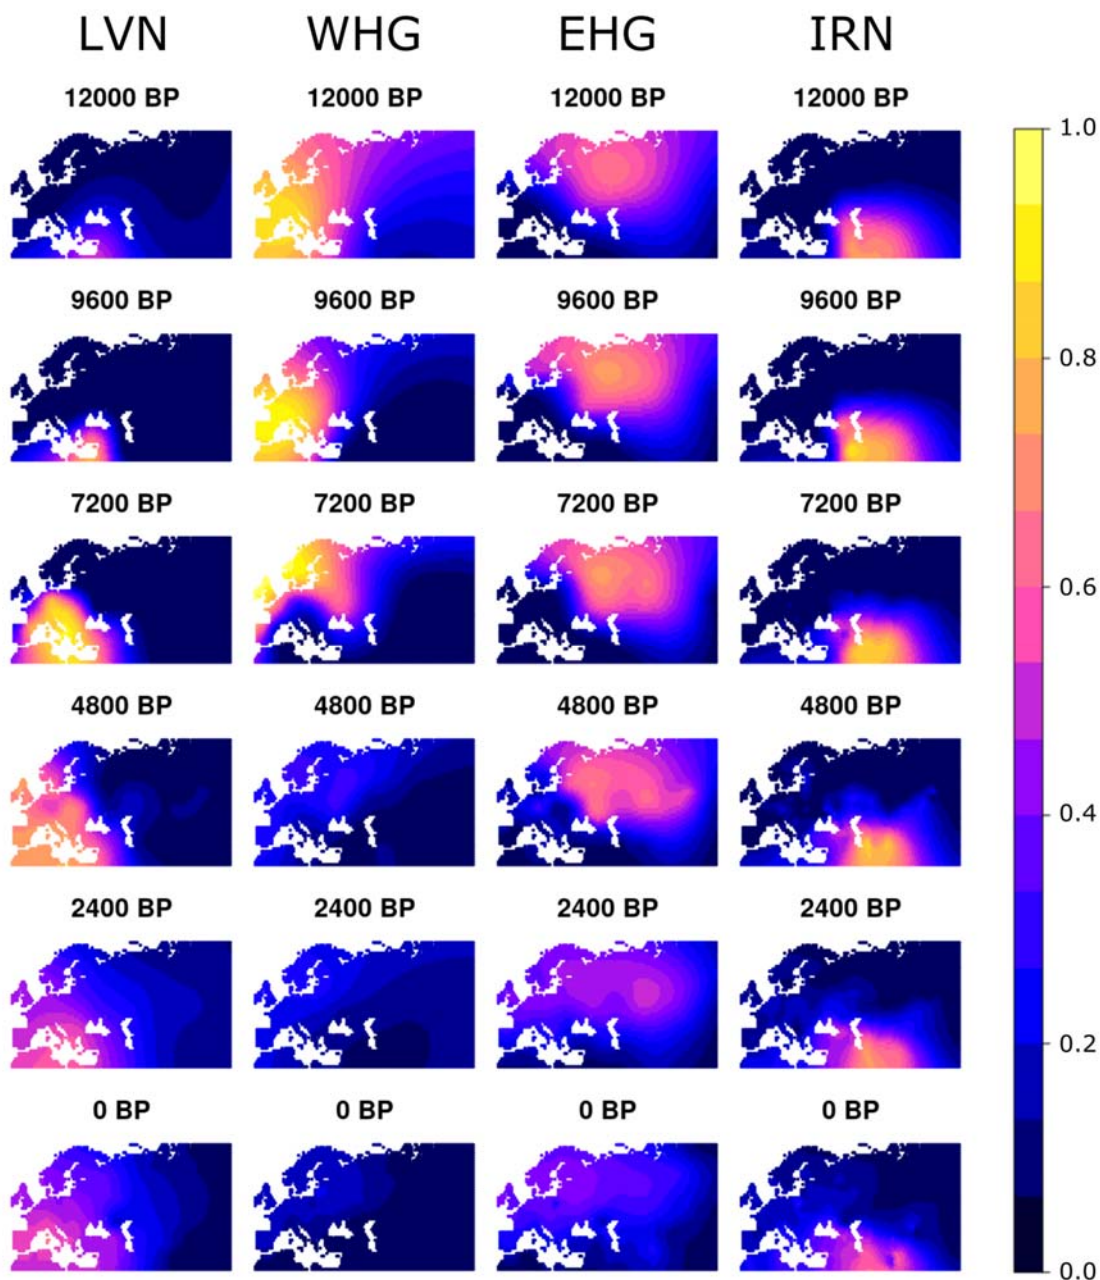

1413

1414 **Figure S3e.1.** Spatiotemporal kriging of four major ancestry clusters over the last 12,000  
 1415 years of human history. LVN = ancestry maximised in Anatolian farmer populations. WHG =  
 1416 ancestry maximised in western European hunter-gatherers. EHG = ancestry maximised in  
 1417 eastern European hunter-gatherers. IRN = ancestry maximised in Iranian Neolithic  
 1418 individuals and Caucasus hunter-gatherers.

1419

1420

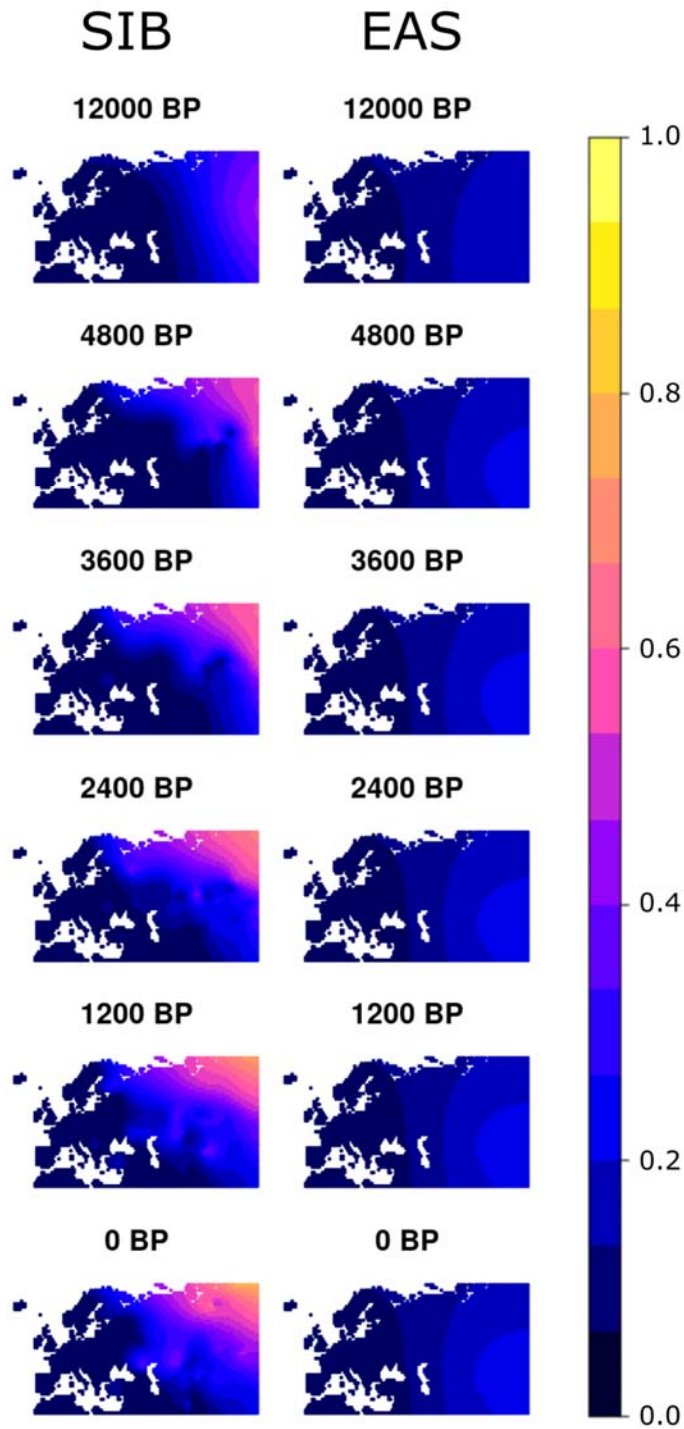

1421

1422 **Figure S3e.2.** Spatiotemporal kriging of two additional ancestry clusters with later incursions  
 1423 into Western Eurasia over the last 12,000 years of human history, particularly focusing on  
 1424 the last 5,000 years. SIB = ancestry maximised in ancient Siberian individuals. EAS =  
 1425 ancestry maximised in East Asian individuals.

1426

1427

1428

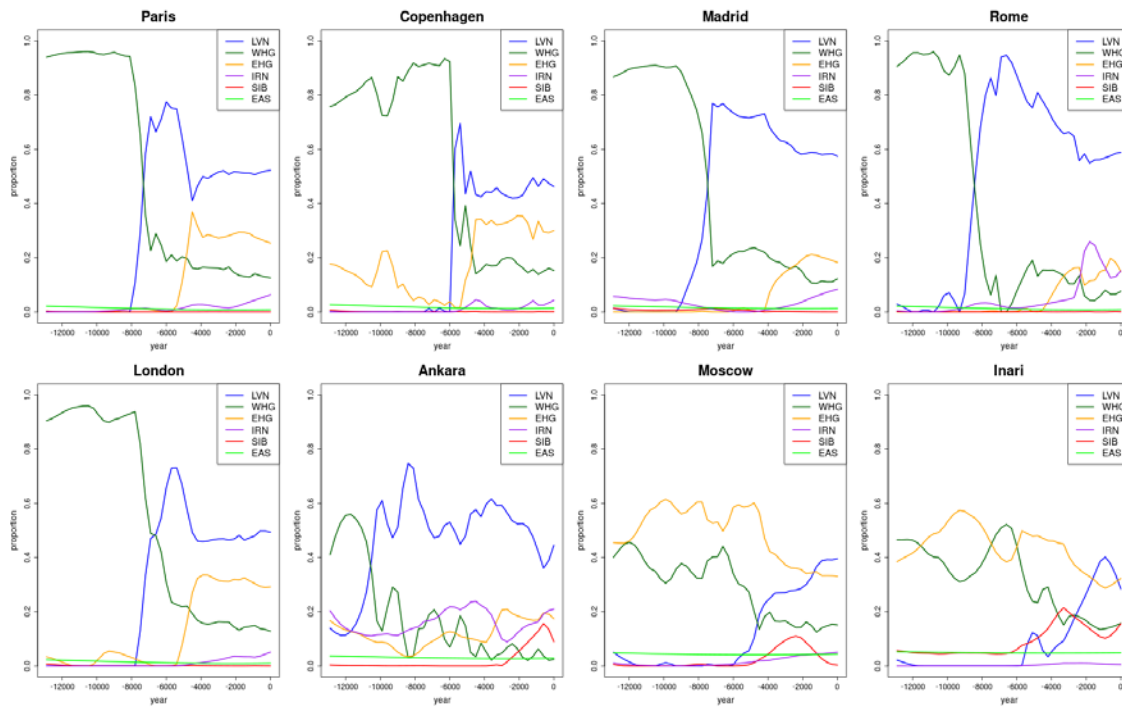

1429

1430 **Figure S3e.3.** Local timelines in what are now 8 urban centres across western Eurasia,  
1431 reflecting local differences in the tempo and mode of ancestry changes over time. LVN =  
1432 ancestry maximised in Anatolian farmer populations. WHG = ancestry maximised in western  
1433 European hunter-gatherers. EHG = ancestry maximised in eastern European hunter-  
1434 gatherers. IRN = ancestry maximised in Iranian Neolithic individuals / Caucasus hunter-  
1435 gatherers. SIB = ancestry maximised in ancient Siberian individuals. EAS = ancestry  
1436 maximised in East Asian individuals.

1437 **Animation S3e.1. IRN**

-12900

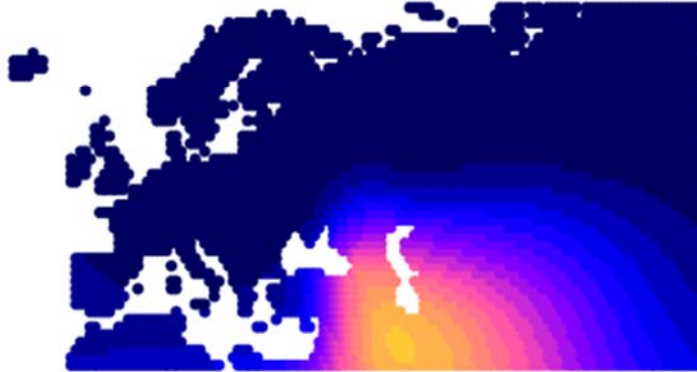

1438

1439

1440 **Animation S3e.2. EHG**

-12900

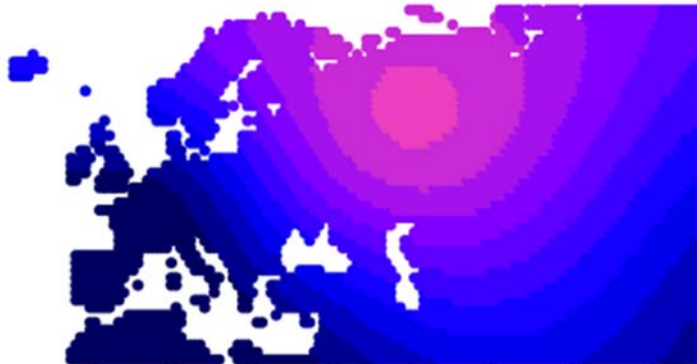

1441

1442

1443 **Animation S3e.3. LVN**

-12900

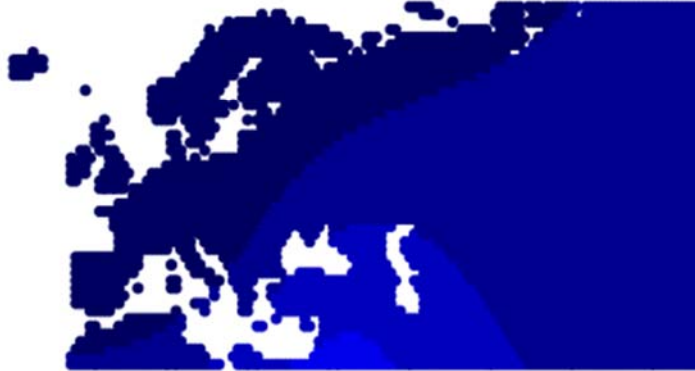

1444

1445

1446 **Animation S3e.4. WHG**

-12900

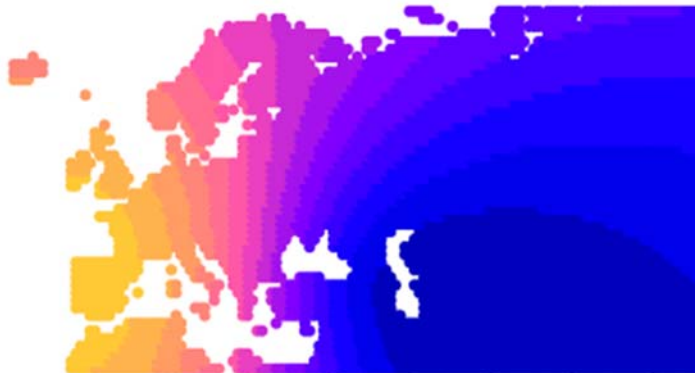

1447

1448 **References**

- 1449 1. Racimo, F. *et al.* The spatiotemporal spread of human migrations during the  
1450 European Holocene. *Proc. Natl. Acad. Sci. U. S. A.* (2020)  
1451 doi:10.1073/pnas.1920051117.

- 1452 2. Alexander, D. H., Novembre, J. & Lange, K. Fast model-based estimation of ancestry  
1453 in unrelated individuals. *Genome Res.* **19**, 1655–1664 (2009).
- 1454 3. Cressie, N. & Wikle, C. K. *Statistics for Spatio-Temporal Data*. (John Wiley & Sons,  
1455 2015).
- 1456 4. Gräler, B., Pebesma, E. & Heuvelink, G. Spatio-Temporal Interpolation using gstat.  
1457 *The R Journal* vol. 8 204 (2016).
- 1458 5. Lazaridis, I. *et al.* Genomic insights into the origin of farming in the ancient Near East.  
1459 *Nature* **536**, 419–424 (2016).
- 1460 6. Lamnidis, T. C. *et al.* Ancient Fennoscandian genomes reveal origin and spread of  
1461 Siberian ancestry in Europe. *Nat. Commun.* **9**, 5018 (2018).
- 1462 7. Tambets, K. *et al.* Genes reveal traces of common recent demographic history for  
1463 most of the Uralic-speaking populations. *Genome Biology* vol. 19 (2018).
- 1464 8. Saag, L. *et al.* The Arrival of Siberian Ancestry Connecting the Eastern Baltic to  
1465 Uralic Speakers further East. *Curr. Biol.* **29**, 1701–1711.e16 (2019).
- 1466 9. Antonio, M. L. *et al.* Ancient Rome: A genetic crossroads of Europe and the  
1467 Mediterranean. *Science* **366**, 708–714 (2019).
- 1468 10. Mathieson, I. *et al.* The genomic history of southeastern Europe. *Nature* **555**,  
1469 197–203 (2018).
- 1470 11. Marcus, J. H. *et al.* Genetic history from the Middle Neolithic to present on the  
1471 Mediterranean island of Sardinia. *Nat. Commun.* **11**, 939 (2020).
- 1472 12. Krzewińska, M. *et al.* Ancient genomes suggest the eastern Pontic-Caspian  
1473 steppe as the source of western Iron Age nomads. *Sci Adv* **4**, 4457 (2018).
- 1474 13. Veeramah, K. R. *et al.* Population genomic analysis of elongated skulls reveals extensive female-biased immigration in Early Medieval Bavaria.  
1475 *Proc. Natl. Acad. Sci. U. S. A.* **115**, 3494–3499 (2018).
- 1476 1476 14. Damgaard, P. de B. *et al.* The first horse herders and the impact of early  
1477 Bronze Age steppe expansions into Asia. *Science* vol. 360 7711 (2018).
- 1478 1478 15. Fernandes, D. M. *et al.* The spread of steppe and Iranian-related ancestry in  
1479



1480 the islands of the western Mediterranean. *Nat Ecol Evol* **4**, 334–345 (2020).

1481

1482

### 1483 3f) HBD/ IBD sharing/ROH/clustering

1484 Martin Sikora<sup>1</sup>

1485 <sup>1</sup>Lundbeck Foundation GeoGenetics Centre, GLOBE Institute, University of Copenhagen,  
1486 Copenhagen, Denmark

1487

#### 1488 Methods

1489 We used *IBDseq*<sup>1</sup> to detect genomic segments shared identical-by-descent (IBD) between all  
1490 individuals in the “1000G” dataset, restricting to transversion SNPs with imputation INFO  
1491 score  $\geq 0.8$  and MAF  $\geq 0.01$ . We filtered the resulting IBD segments for LOD score  $\geq 3$  and a  
1492 minimum length of 2 centimorgans (cM), and further removed regions of excess IBD  
1493 following the approach of Browning and Browning<sup>2</sup>. First, we used the *GenomicRanges*<sup>3</sup>  
1494 package in R to calculate the total number of IBD segments overlapping each position along  
1495 the genome, and calculated their 3% trimmed mean and standard deviation (SD). We then  
1496 called regions of excess IBD if they were  $> 3$  trimmed SD from the trimmed mean. We split  
1497 IBD segments overlapping the excess IBD regions, and removed any segments with length  $<$   
1498 2 cM after splitting. For analyses of runs of homozygosity (ROH) we used a shorter length  
1499 cutoff of 1cM.

1500

1501 We carried out genetic clustering of the ancient individuals using hierarchical community  
1502 detection on a network of pairwise identity-by-descent (IBD)-sharing similarities<sup>4</sup>. To facilitate  
1503 detection of clusters at a finer scale, we ran *IBDseq* on a dataset restricting to ancient  
1504 samples only, and applied more lenient filters of imputation INFO score  $> 0.5$ , and minimum  
1505 IBD segment length of 1 cM. We constructed a weighted network of the individuals using the  
1506 *igraph*<sup>5</sup> package in R, with the fraction of the genome shared IBD between pairs of  
1507 individuals as weights. We then performed iterative community detection on this network  
1508 using the Leiden algorithm<sup>6</sup> implemented in the *leidenAlg* R package (*v1.01*,  
1509 <https://github.com/kharchenkolab/leidenAlg>). We used a resolution parameter of  $r=0.5$  as the  
1510 starting value for each level of community detection. If more than one community was  
1511 detected, we split the network into the respective communities, and repeated the community  
1512 detection step. If no communities were detected, we incremented the resolution parameter in  
1513 steps of 0.5 until a maximum value of  $r=3$ . The initial clustering was completed when no  
1514 more communities were detected at the highest resolution parameter, across all

1515 subcommunities. To convert the resulting hierarchy into a final clustering, we simplified the  
1516 initial clustering by collapsing nodes into single clusters based on observed spatiotemporal  
1517 annotations of the samples.

1518

1519 To estimate ancestry proportions from patterns of pairwise IBD sharing, we used an  
1520 approach akin to “chromosome painting”<sup>7</sup>. We first inferred an IBD-based “painting profile”  
1521 for each target individual, by summing up the total amount of IBD shared with each “donor”  
1522 group (using population labels for modern donors or IBD-based genetic clusters for ancient  
1523 donors), and normalising them to the interval [0, 1]. We used a leave-one-out approach as in<sup>8</sup>  
1524 to account for the fact that recipient individuals cannot be included as donors from their own  
1525 group. We then used these painting profiles in supervised modelling of target individuals as  
1526 mixtures from different sets of putative source groups<sup>8,9</sup>, using non-negative least squares  
1527 implemented in the R package *limSolve*<sup>10</sup>.

1528

1529 To investigate ancestry compositions across the full set of ancient individuals, we used three  
1530 sets of source groups reflecting different temporal depths:

1531

- 1532 - “deep”, a set of groups representing highly differentiated deep ancestry sources
- 1533 - “postNeol”, using diverse Neolithic and earlier source groups
- 1534 - “postBA”, using Late Neolithic and Bronze Age source groups

1535

1536 We also performed two analyses of more restricted spatiotemporal scope:

1537

- 1538 - “hgEur”, modelling European hunter-gatherers as mixtures of early European hunter-  
1539 gatherers and selected outgroups
- 1540 - “fEur”, modelling later European farmers as mixtures of earlier farmers and hunter-  
1541 gatherers
- 1542 - “postNeolScand”, modelling Scandinavian Late Neolithic and early Bronze Age  
1543 individuals as mixtures of other European early Bronze Age groups.

1544

## 1545 Results

### 1546 IBD-based hierarchical graph clustering

1547 We performed hierarchical graph clustering on the 1,492 ancient individuals passing all  
1548 filters, which were assigned into a final curated set of 122 genetic clusters (Fig. S3f.1). The  
1549 obtained clusters captured both broad and finer-scale genetic structure, corresponding to  
1550 shared ancestry within particular spatiotemporal ranges and/or archaeological contexts (Fig.

1551 **S3f.2**). We named these cluster using a “geographic-temporal” nomenclature<sup>11</sup> (e.g.  
1552 “Denmark\_10500BP\_6000BP”), in concert with more traditional names for groups of multiple  
1553 clusters with shared archaeological or subsistence contexts (e.g. “Farmer\_Europe\_early”)  
1554 where applicable.

1555

1556 At the highest level of the clustering hierarchy, the individuals were partitioned into six global  
1557 clusters representing broad continent-wide genetic structure.

1558

- 1559 - Africa\_8000BP\_400BP
- 1560 - Europe\_15000BP\_4000BP
- 1561 - EuropeWCAAsia\_25000BP\_300BP
- 1562 - Eurasia\_5000BP\_200BP
- 1563 - Asia\_45000BP\_200BP
- 1564 - Americas\_12000BP\_100BP

1565 The following sections provide more detailed descriptions of relevant sub-clusters within the  
1566 four global clusters from Eurasia.

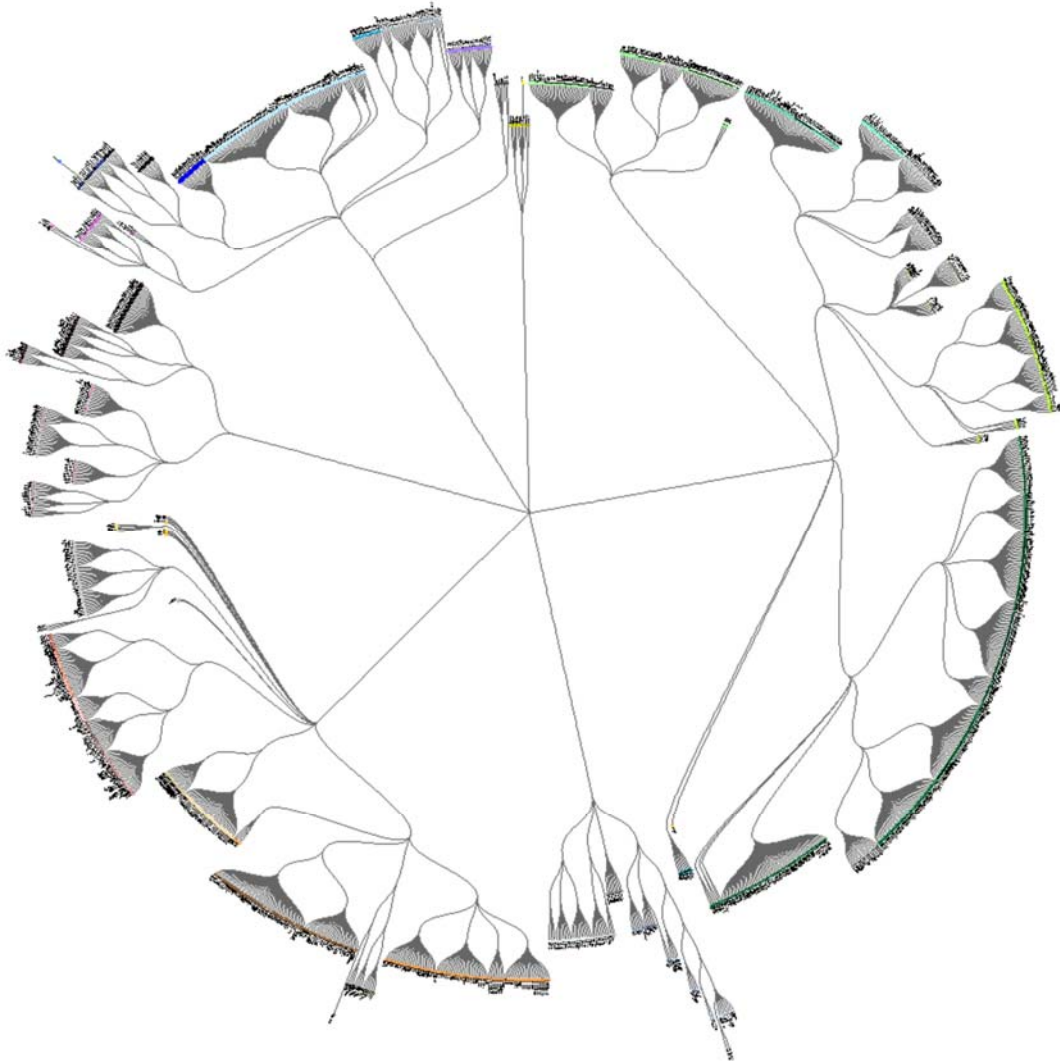

1567

1568 **Fig. S3f.1. Hierarchical graph clustering.** Tree diagram showing final curated hierarchical

1569 clustering relationship among the 1,492 ancient individuals passing all filters. Genetic

1570 clusters are differentiated using plot symbol colours and shapes.

1571

1572

1573

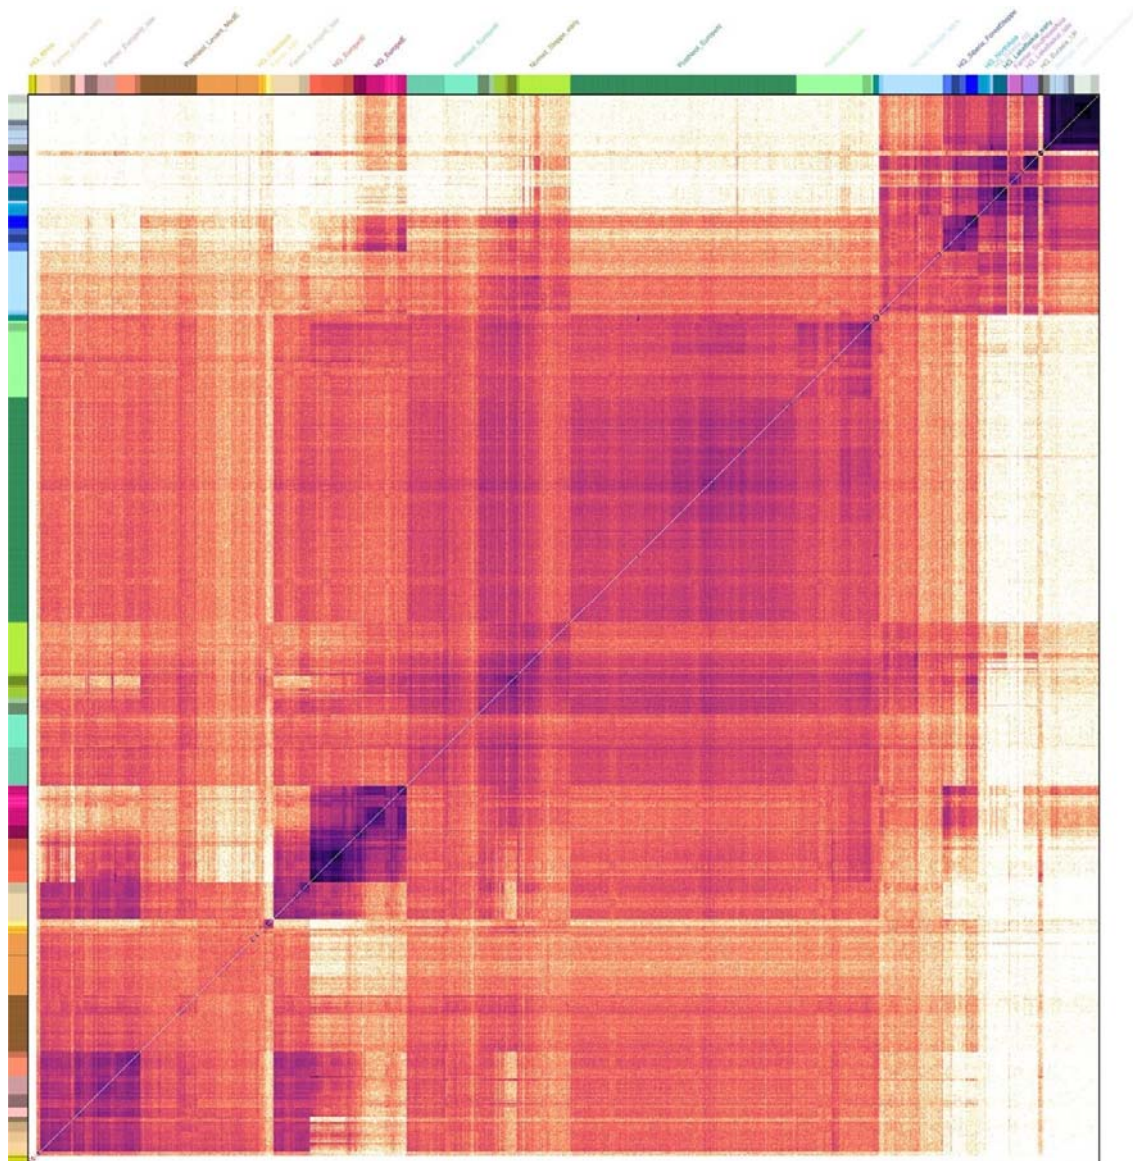

1574

1575 **Fig. S3f.2. IBD sharing similarities.** Heatmap of pairwise IBD-sharing similarities between  
 1576 the 1,492 ancient individuals passing all filters, sorted according to clustering hierarchy.  
 1577 Colored bars indicate cluster membership of individuals. Selected cluster group labels are  
 1578 shown in the top colour bar.

1579

1580 Europe 15000BP 4000BP

1581

1582 This global cluster includes individuals from western Eurasian Mesolithic and Neolithic  
 1583 contexts with hunter-gatherer ancestry. The individual genetic clusters are partitioned into  
 1584 two cluster groups corresponding to “Eastern hunter-gatherers” and “Western hunter-  
 1585 gatherers” as previously used in the literature (Fig. S3f.3-6):

1586

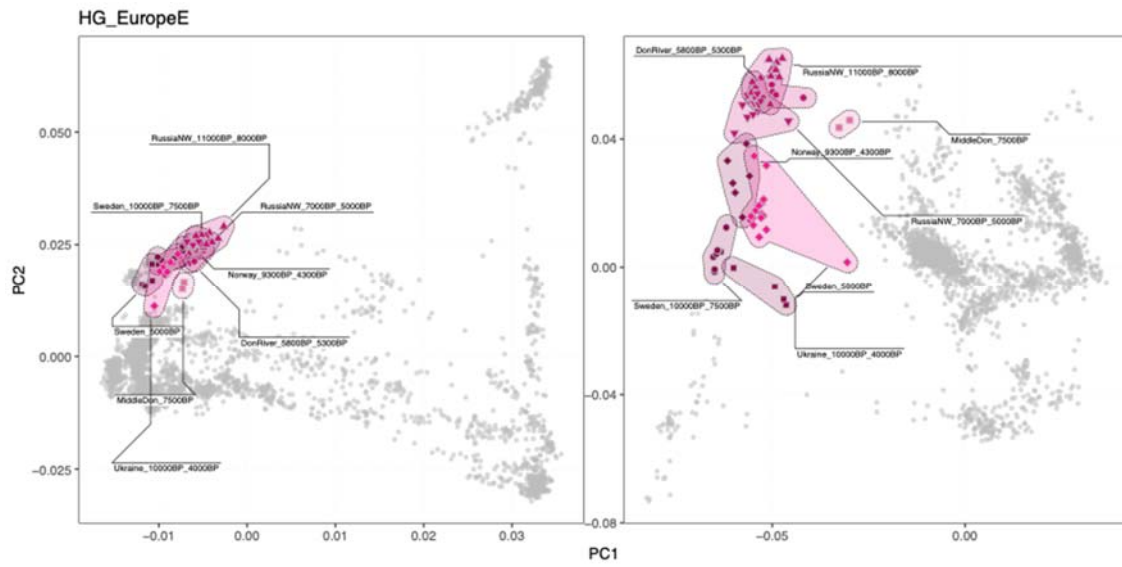

1587

1588 **Fig. S3f.3** PCA for cluster group *HG\_EuropeE*. PCA positions of individuals within specific  
1589 clusters are highlighted with colored symbols, and connected with shaded hulls (from PCAs  
1590 shown in Fig. S3d.7).

1591

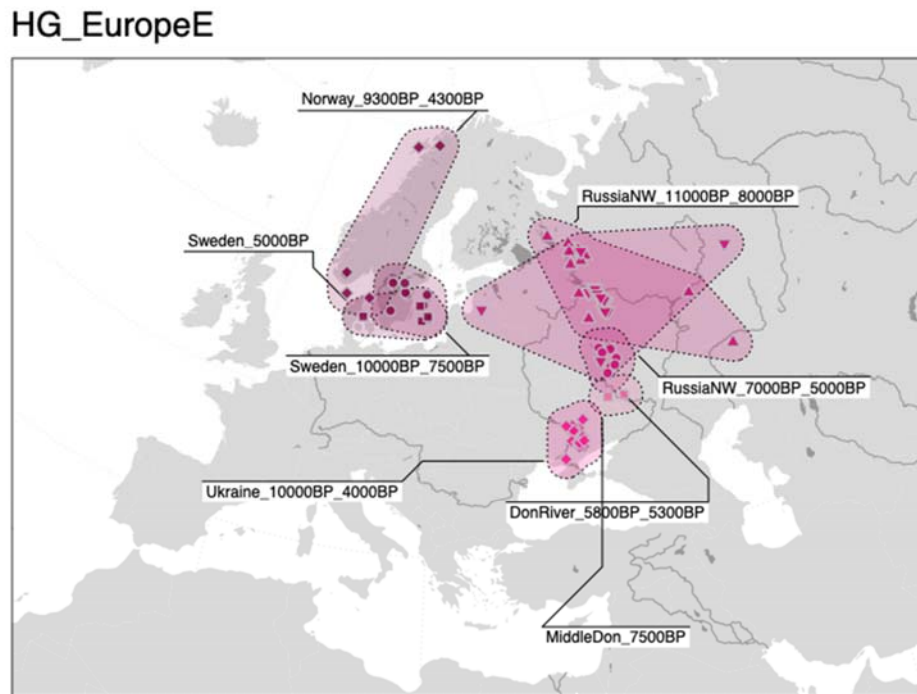

1592

1593 **Fig. S3f.4** Geographic distribution of individuals in cluster group *HG\_EuropeE*.

1594 Geographic locations of individuals within specific clusters are highlighted with colored

1595 symbols, and connected with shaded hulls (from PCAs shown in Fig. S3d.7).

1596

1597

1598

1599

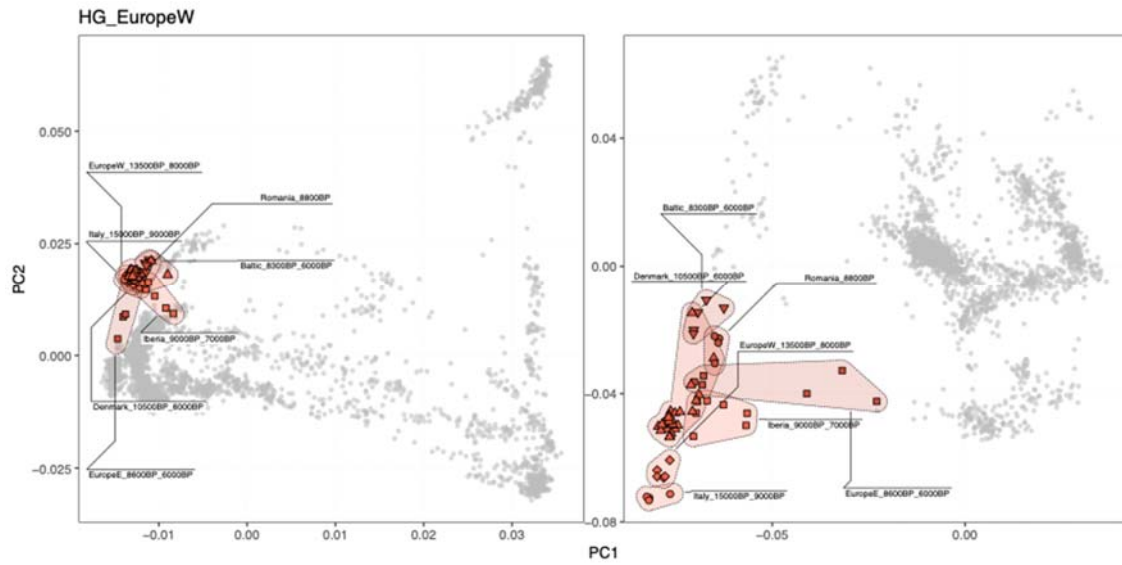

1600

1601

1602

1603

1604

**Fig. S3f.5 PCA for cluster group *HG\_EuropeW*.** PCA positions of individuals within specific clusters are highlighted with colored symbols, and connected with shaded hulls (from PCAs shown in Fig. S3d.7).

### HG\_EuropeW

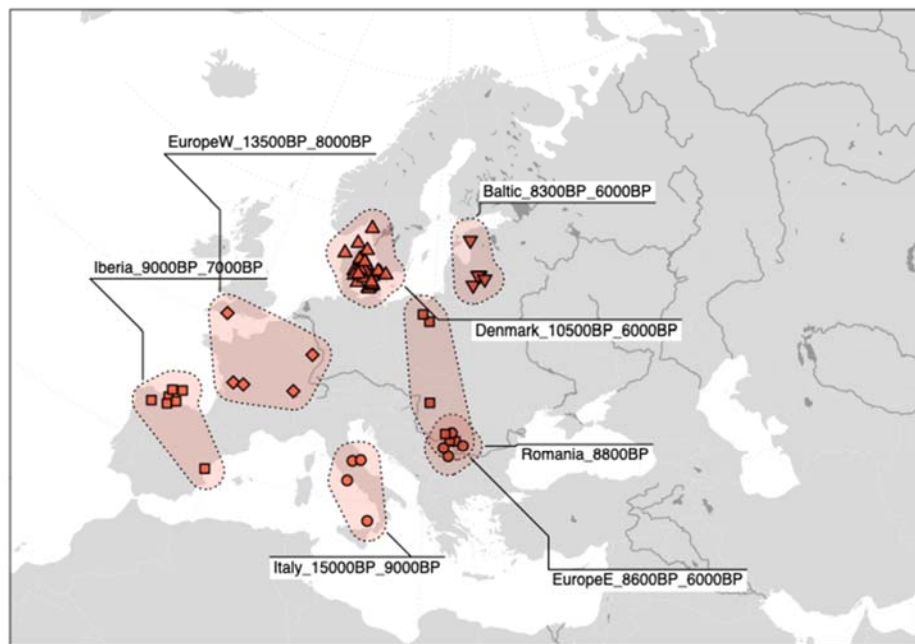

1605

1606 **Fig. S3f.6 Geographic distribution of individuals in cluster group *HG\_EuropeW*.**

1607 Geographic locations of individuals within specific clusters are highlighted with colored

1608 symbols, and connected with shaded hulls (from PCAs shown in Fig. S3d.7).

1609

1610 EuropeWCAAsia\_25000BP\_300BP

1611

1612 This global cluster includes individuals from western Eurasia with ancestry related to

1613 Mesolithic and Neolithic Near Eastern groups. The individual genetic clusters are partitioned

1614 into a total of eight cluster groups, including all clusters of “Neolithic farmers” and “Caucasus

1615 hunter-gatherers” previously used in the literature (Fig. S3f.7-20).

1616

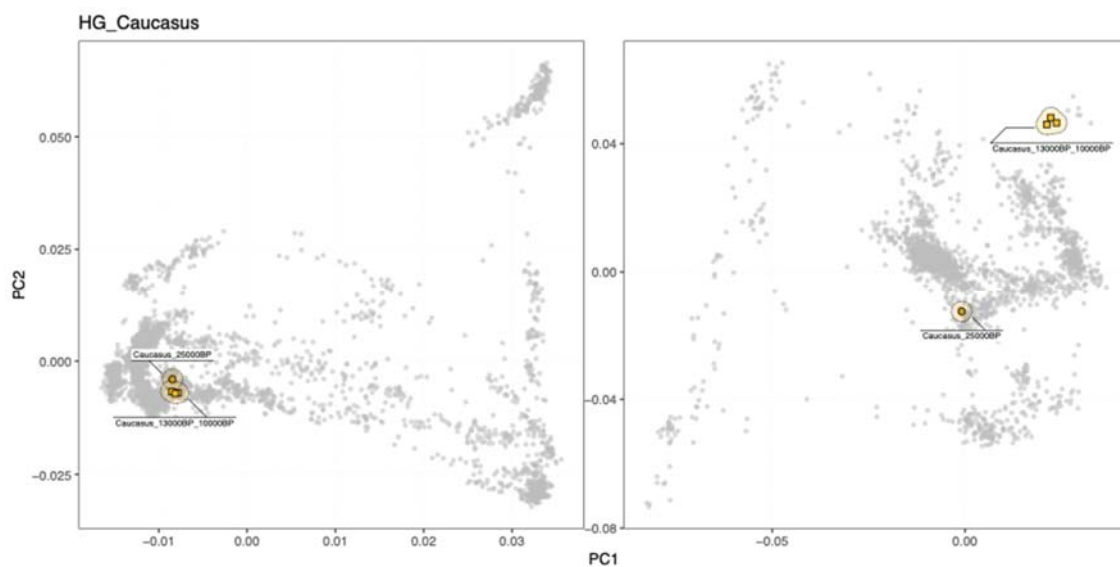

1617

1618 **Fig. S3f.7 PCA for cluster group *HG\_Caucasus*.** PCA positions of individuals within

1619 specific clusters are highlighted with colored symbols, and connected with shaded hulls (from

1620 PCAs shown in Fig. S3d.7).

1621



## HG\_Caucasus

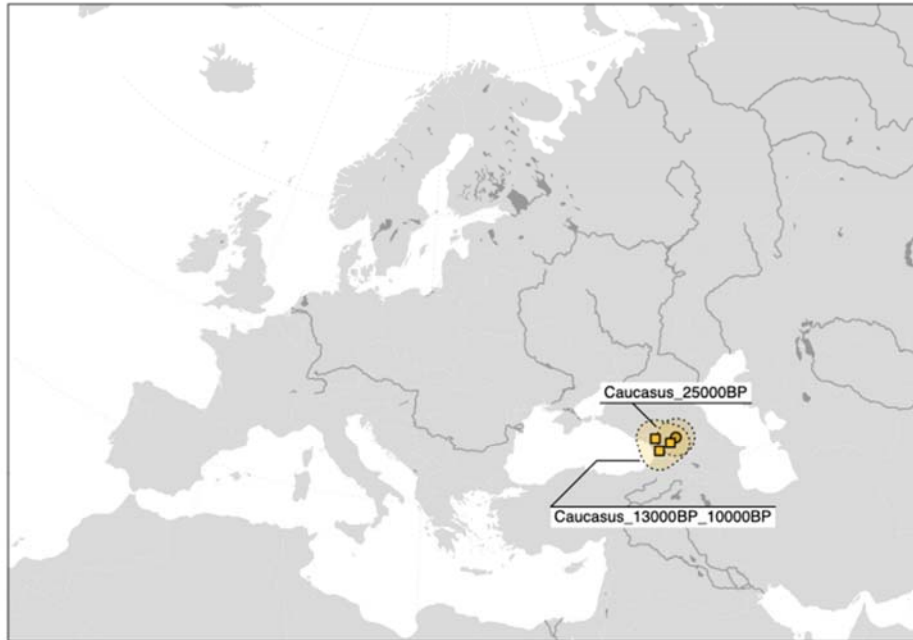

1622

1623 **Fig. S3f.8** Geographic distribution of individuals in cluster group *HG\_Caucasus*.

1624 Geographic locations of individuals within specific clusters are highlighted with colored symbols

1625 and connected with shaded hulls (from PCAs shown in Fig. S3d.7).

1626

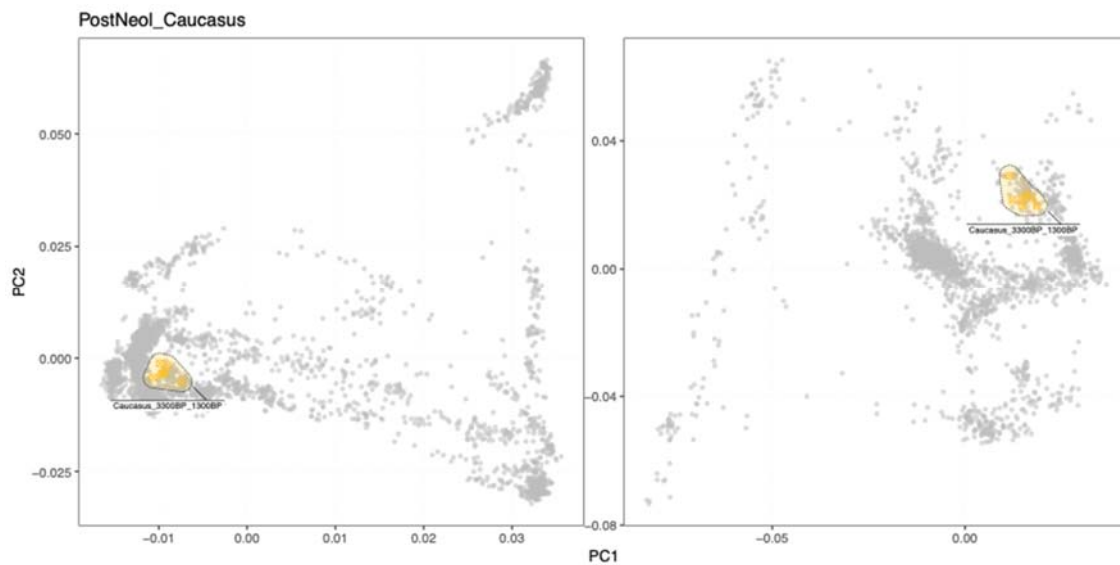

1627

1628 **Fig. S3f.9** PCA for cluster group *PostNeol\_Caucasus*. PCA positions of individuals within

1629 specific clusters are highlighted with colored symbols, and connected with shaded hulls (from

1630 PCAs shown in Fig. S3d.7).

1631

1632

### PostNeol\_Caucasus

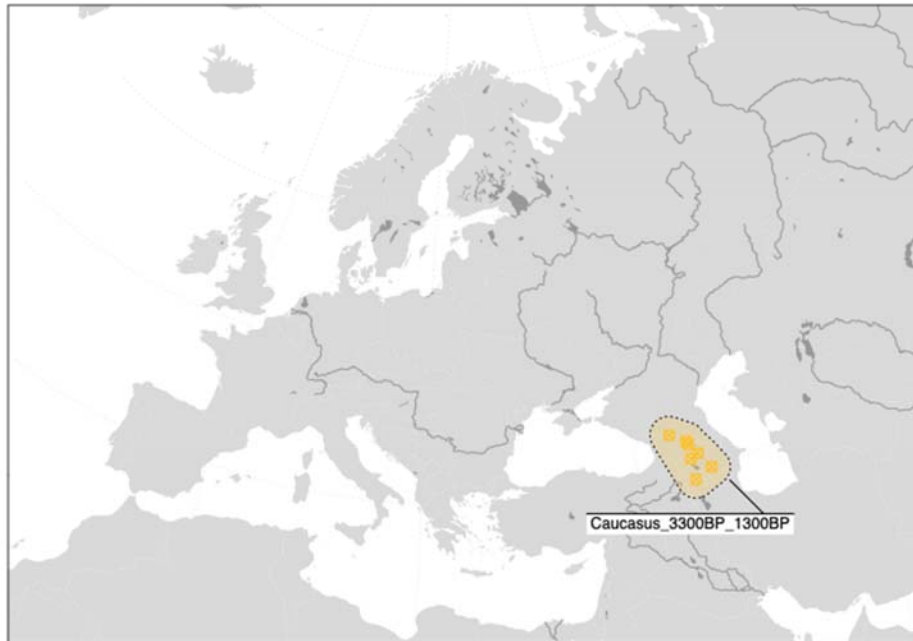

1633

1634 **Fig. S3f.10 Geographic distribution of individuals in cluster group**

1635 *PostNeol\_Caucasus*. Geographic locations of individuals within specific clusters are  
1636 highlighted with colored symbols, and connected with shaded hulls (from PCAs shown in Fig.  
1637 **S3d.7**).

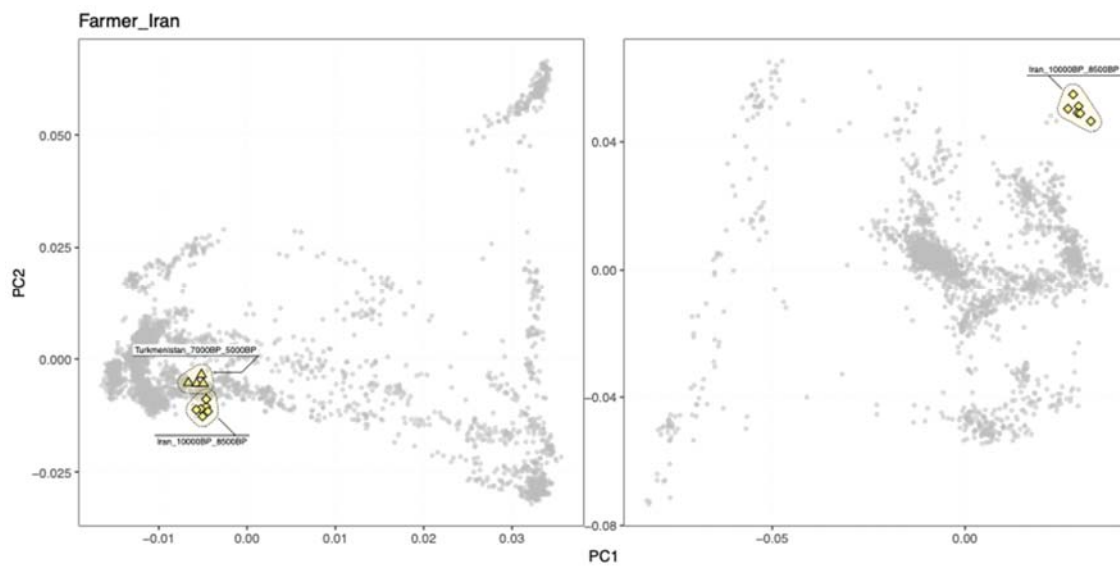

1638

1639

1640 **Fig. S3f.11** PCA for cluster group *Farmer\_Iran*. PCA positions of individuals within specific  
 1641 clusters are highlighted with colored symbols, and connected with shaded hulls (from PCAs  
 1642 shown in Fig. S3d.7).  
 1643  
 1644

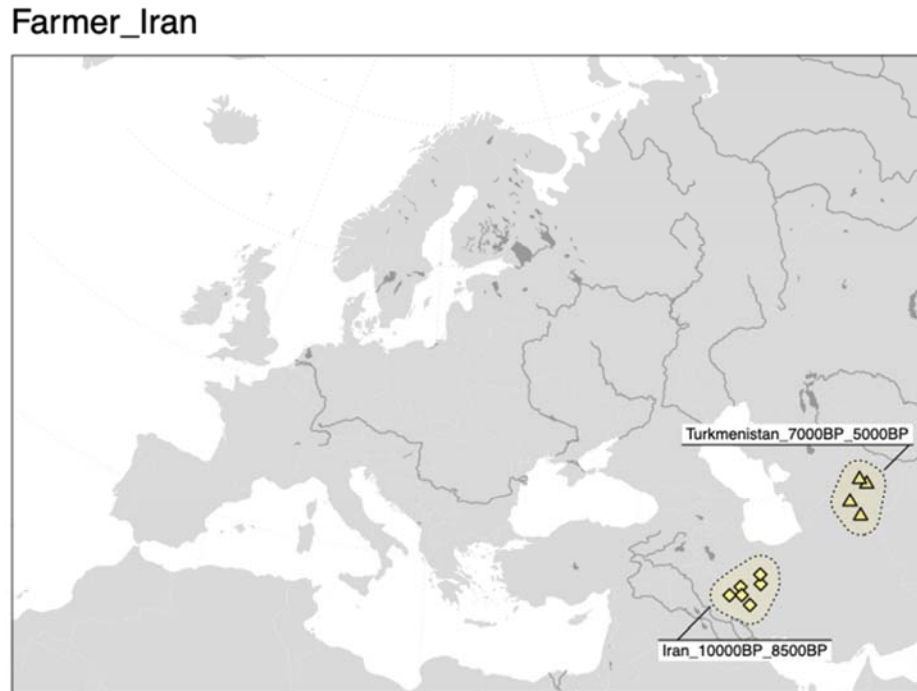

1645  
 1646 **Fig. S3f.12** Geographic distribution of individuals in cluster group *Farmer\_Iran*.  
 1647 Geographic locations of individuals within specific clusters are highlighted with colored  
 1648 symbols, and connected with shaded hulls (from PCAs shown in Fig. S3d.7).

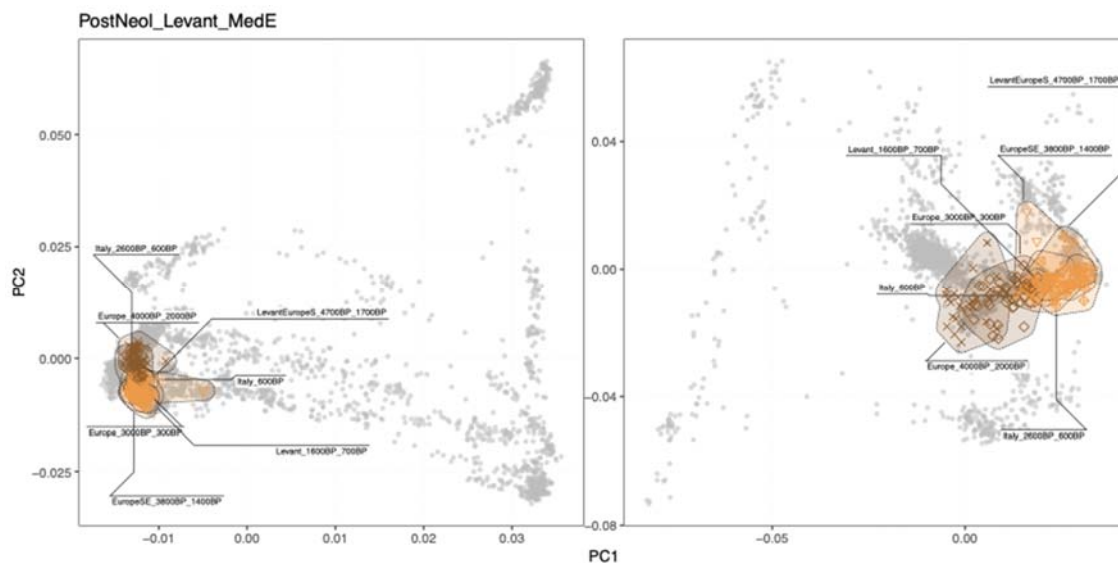

1649

1650 **Fig. S3f.13** PCA for cluster group *PostNeol\_Levant\_MedE*. PCA positions of individuals  
1651 within specific clusters are highlighted with colored symbols, and connected with shaded  
1652 hulls (from PCAs shown in Fig. S3d.7).  
1653  
1654

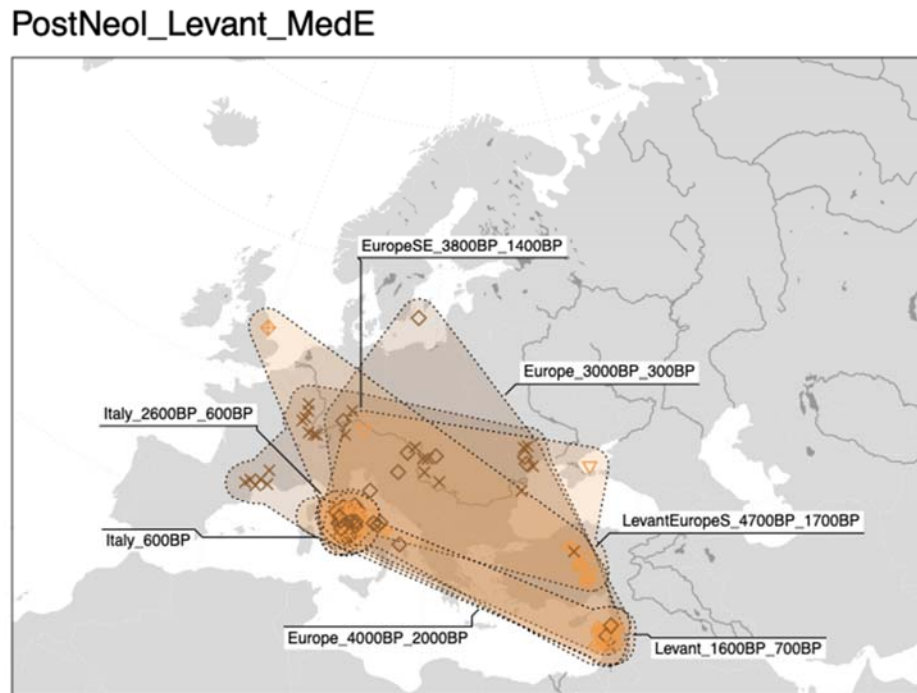

1655  
1656 **Fig. S3f.14** Geographic distribution of individuals in cluster group  
1657 *PostNeol\_Levant\_MedE*. Geographic locations of individuals within specific clusters are  
1658 highlighted with colored symbols, and connected with shaded hulls (from PCAs shown in Fig.  
1659 S3d.7).

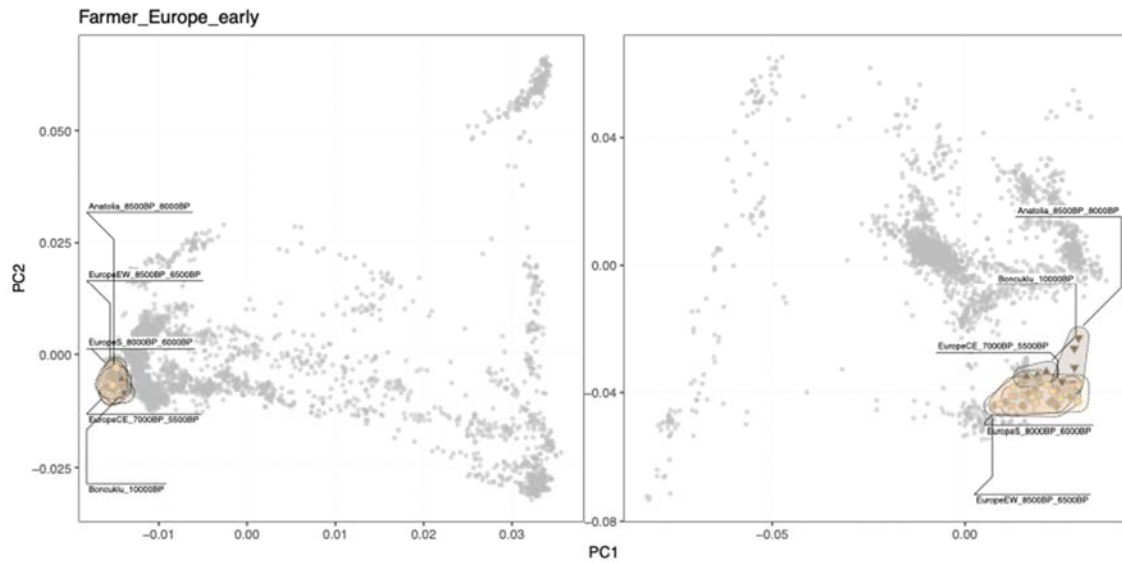

1660  
 1661  
 1662  
 1663  
 1664  
 1665

**Fig. S3f.15** PCA for cluster group *Farmer\_Europe\_early*. PCA positions of individuals within specific clusters are highlighted with colored symbols, and connected with shaded hulls (from PCAs shown in Fig. S3d.7).

**Farmer\_Europe\_early**

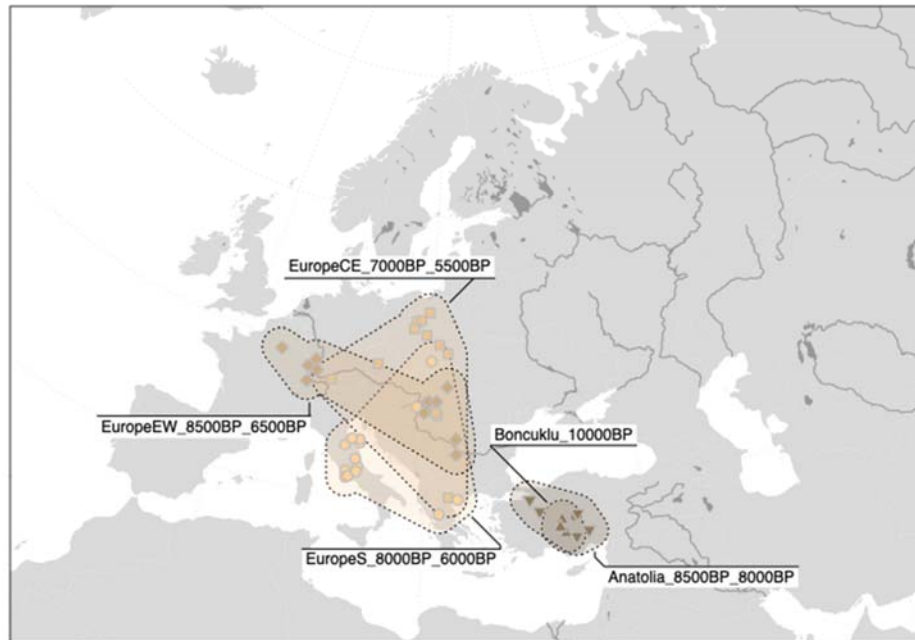

1666  
 1667  
 1668

**Fig. S3f.16** Geographic distribution of individuals in cluster group *Farmer\_Europe\_early*. Geographic locations of individuals within specific clusters are

1669 highlighted with colored symbols, and connected with shaded hulls (from PCAs shown in Fig.  
1670 S3d.7).

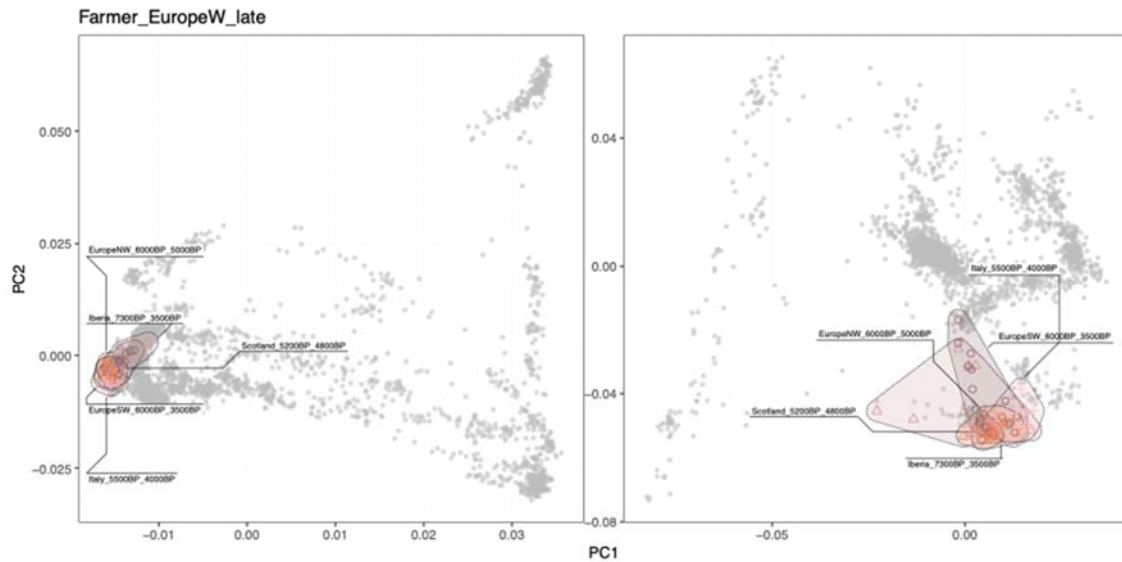

1671  
1672 **Fig. S3f.17** PCA for cluster group *Farmer\_EuropeW\_late*. PCA positions of individuals  
1673 within specific clusters are highlighted with colored symbols, and connected with shaded  
1674 hulls (from PCAs shown in Fig. S3d.7).  
1675  
1676

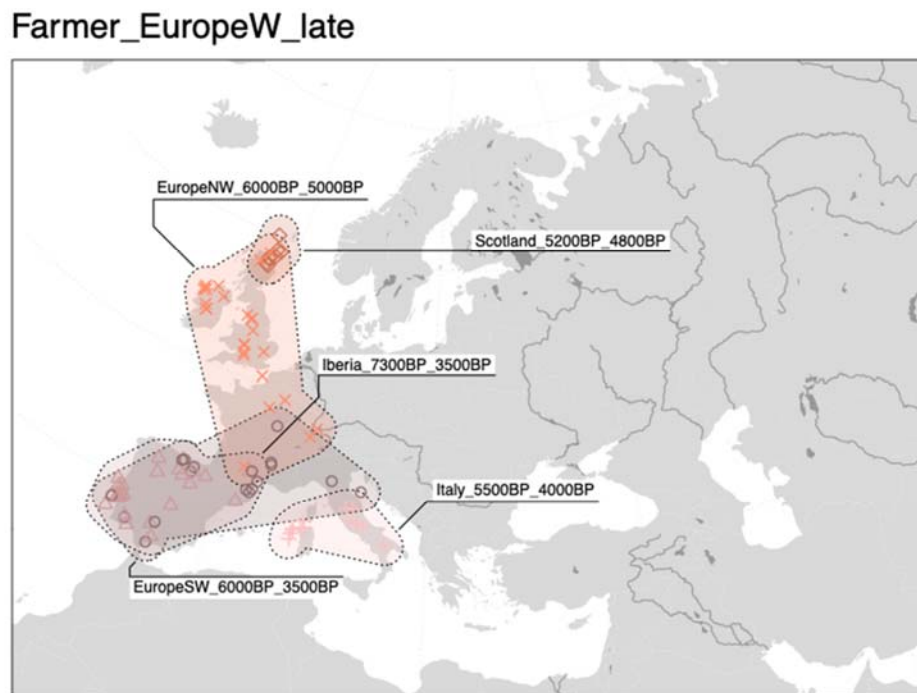

1677

1678 **Fig. S3f.18** Geographic distribution of individuals in cluster group  
1679 *Farmer\_EuropeW\_late*. Geographic locations of individuals within specific clusters are  
1680 highlighted with colored symbols, and connected with shaded hulls (from PCAs shown in Fig.  
1681 S3d.7).  
1682

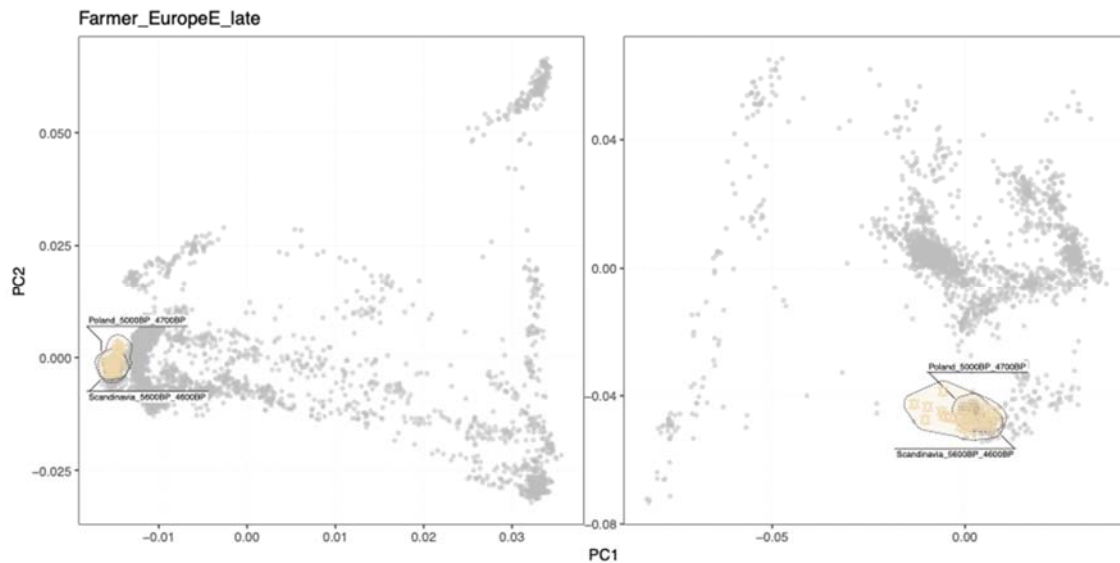

1683  
1684 **Fig. S3f.19** PCA for cluster group *Farmer\_EuropeE\_late*. PCA positions of individuals  
1685 within specific clusters are highlighted with colored symbols, and connected with shaded  
1686 hulls (from PCAs shown in Fig. S3d.7).

## Farmer\_EuropeE\_late

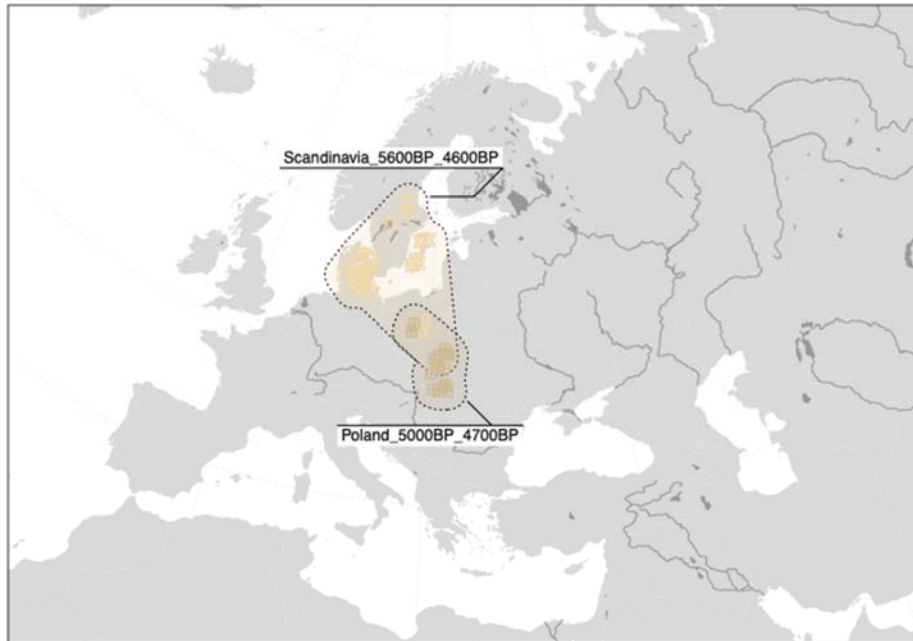

1688

1689 **Fig. S3f.20 Geographic distribution of individuals in cluster group**

1690 **Farmer\_EuropeE\_late.** Geographic locations of individuals within specific clusters are  
 1691 highlighted with colored symbols, and connected with shaded hulls (from PCAs shown in Fig.  
 1692 S3d.7).

1693

1694 Eurasia 5000BP 200BP

1695 This global cluster includes individuals from western Eurasia from the Bronze Age onwards.

1696 The individual genetic clusters are partitioned into a total of five cluster groups, including all

1697 clusters of individuals with “Steppe ancestry” related to Bronze Age Steppe pastoralists

1698 previously used in the literature (Fig. S3f.21-28).



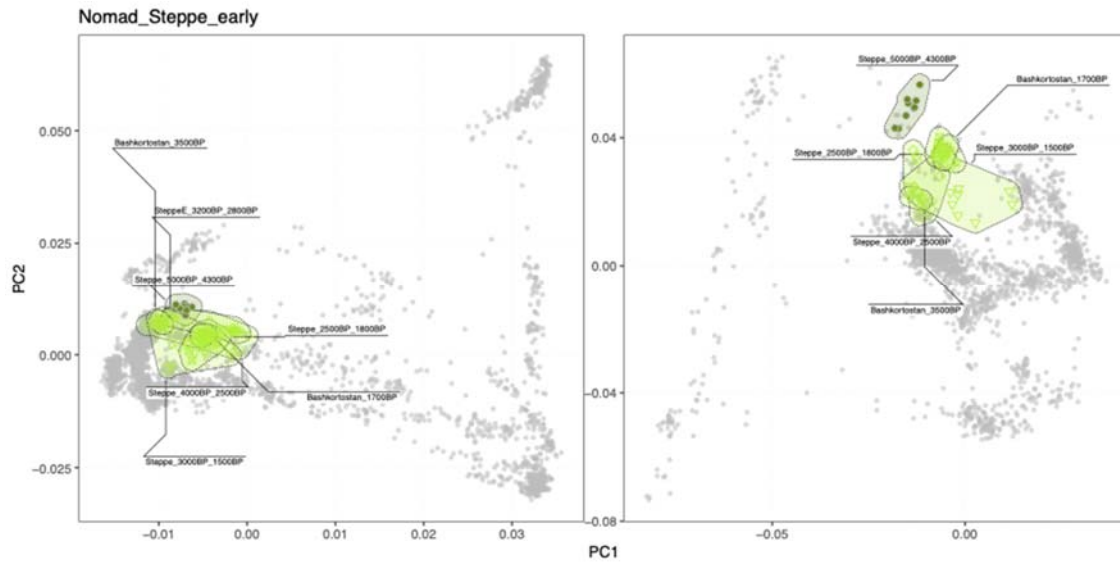

1700

1701

1702

1703

1704

**Fig. S3f.21** PCA for cluster group *Nomad\_Steppe\_early*. PCA positions of individuals within specific clusters are highlighted with colored symbols, and connected with shaded hulls (from PCAs shown in Fig. S3d.7).

### Nomad\_Steppe\_early

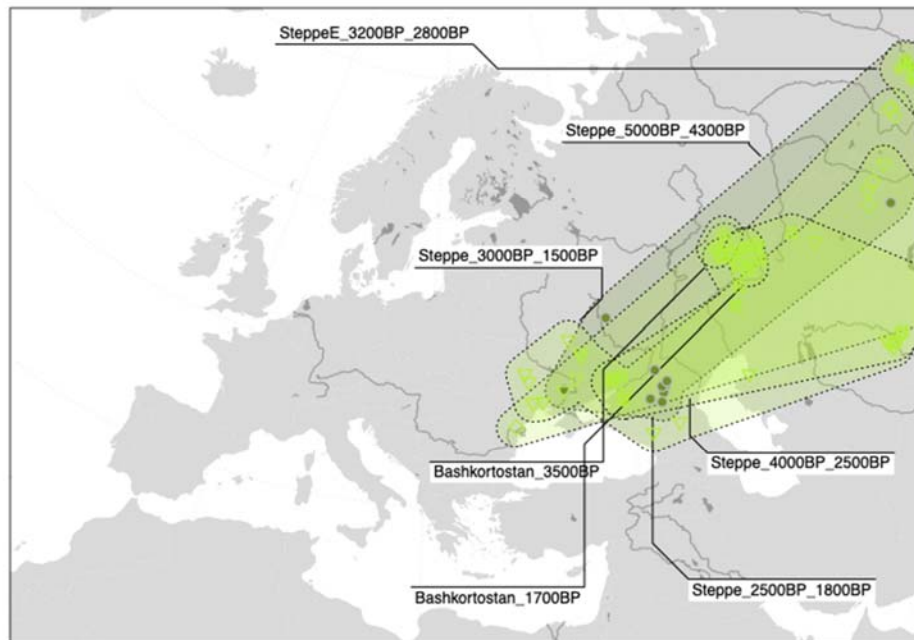

1705

1706

1707

**Fig. S3f.22** Geographic distribution of individuals in cluster group *Nomad\_Steppe\_early*. Geographic locations of individuals within specific clusters are

1708 highlighted with colored symbols, and connected with shaded hulls (from PCAs shown in Fig.  
1709 S3d.7).  
1710

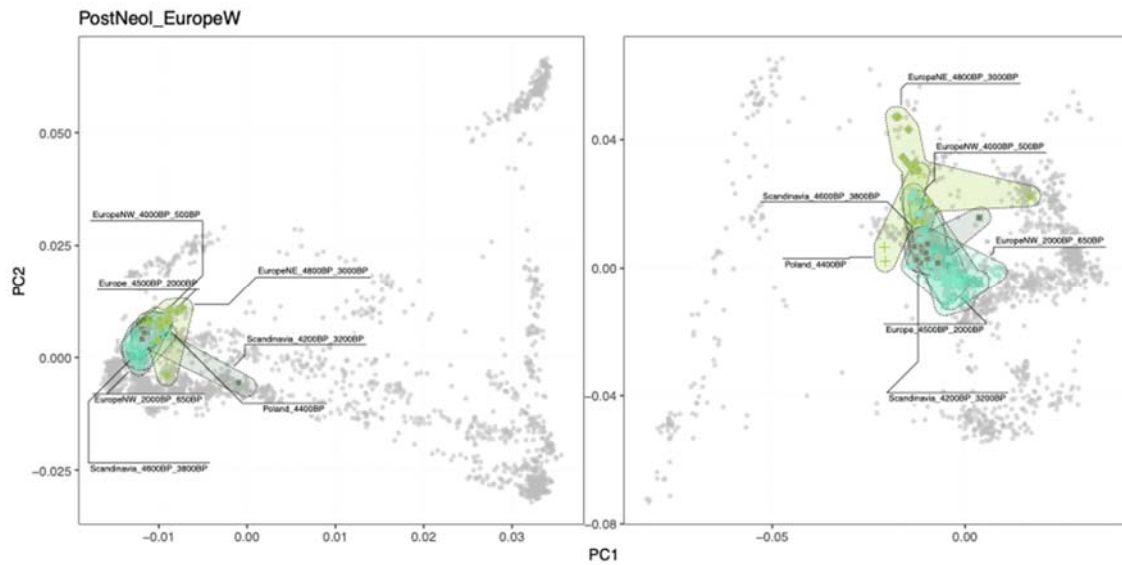

1711  
1712 **Fig. S3f.23** PCA for cluster group *PostNeol\_EuropeW*. PCA positions of individuals within  
1713 specific clusters are highlighted with colored symbols, and connected with shaded hulls (from  
1714 PCAs shown in Fig. S3d.7).  
1715

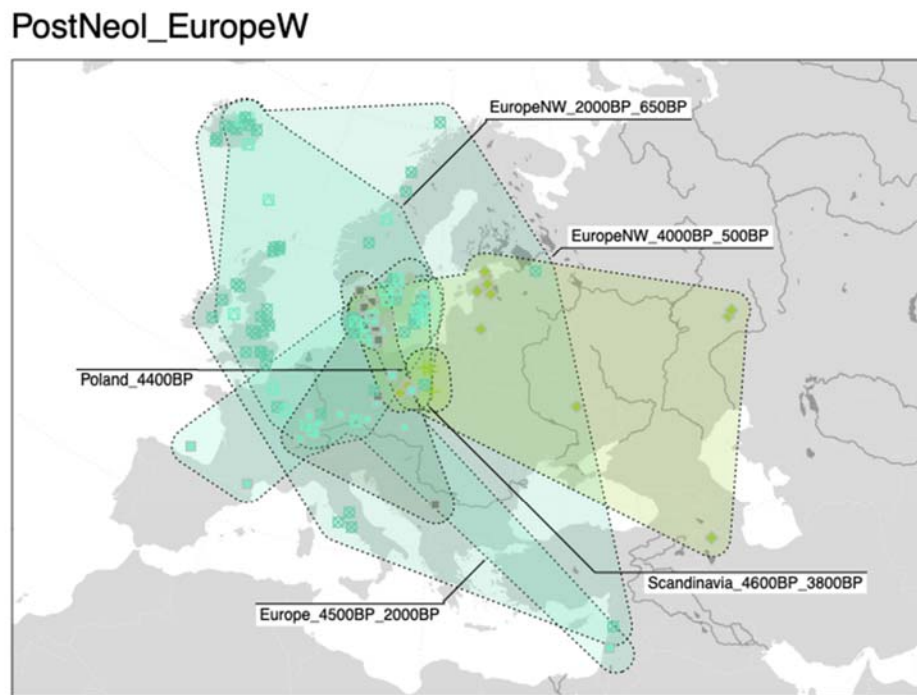

1716

1717 **Fig. S3f.24** Geographic distribution of individuals in cluster group *PostNeol\_EuropeW*.

1718 Geographic locations of individuals within specific clusters are highlighted with colored

1719 symbols, and connected with shaded hulls (from PCAs shown in Fig. S3d.7).

1720

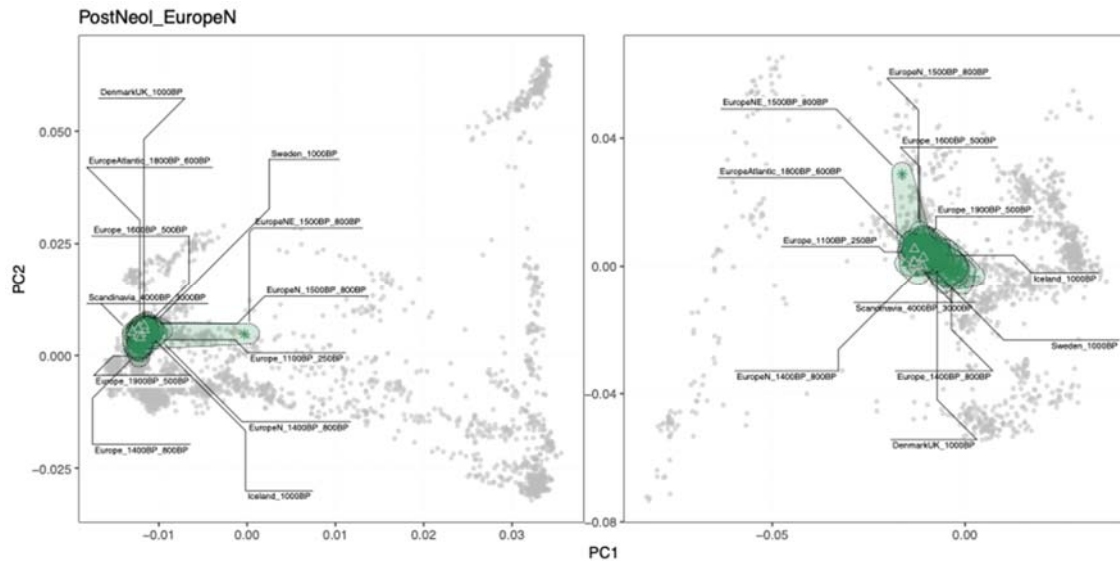

1721

1722 **Fig. S3f.25** PCA for cluster group *PostNeol\_EuropeN*. PCA positions of individuals within

1723 specific clusters are highlighted with colored symbols, and connected with shaded hulls (from

1724 PCAs shown in Fig. S3d.7).

1725

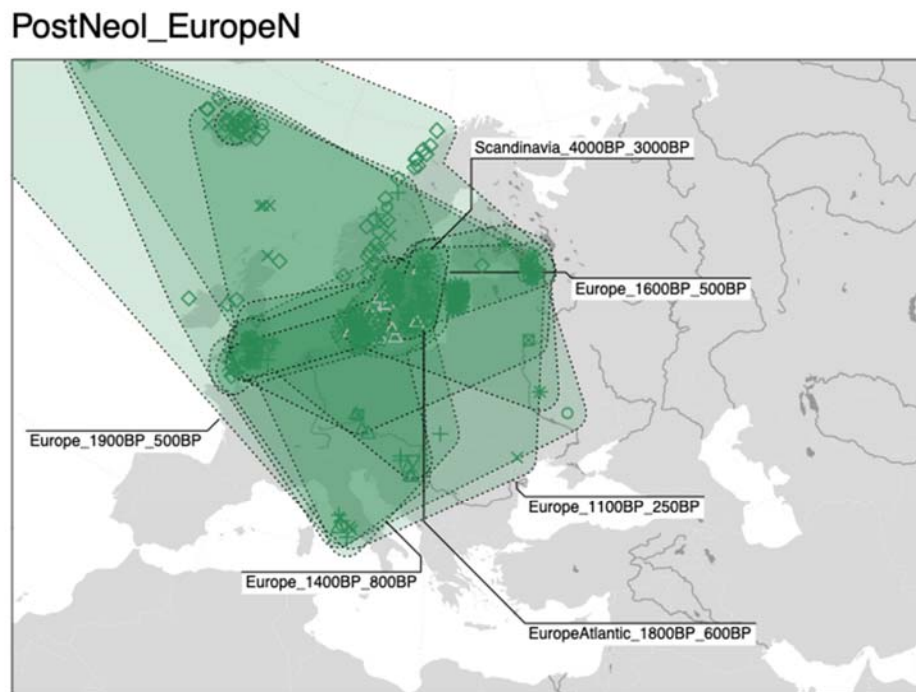

1726

1727 **Fig. S3f.26** Geographic distribution of individuals in cluster group *PostNeol\_EuropeN*.

1728 Geographic locations of individuals within specific clusters are highlighted with colored

1729 symbols, and connected with shaded hulls (from PCAs shown in Fig. S3d.7).

1730

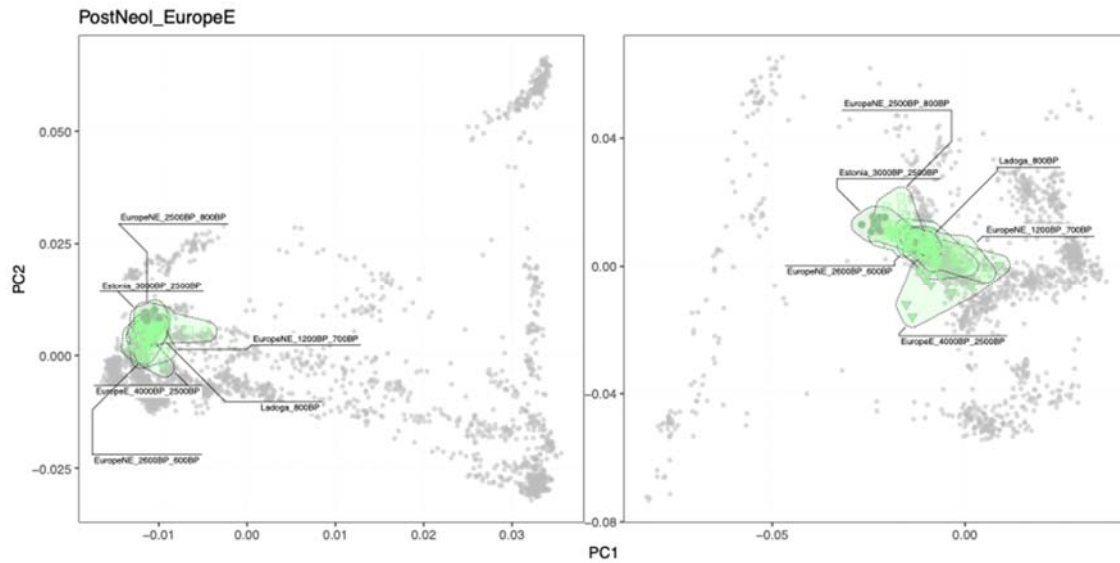

1731

1732 **Fig. S3f.27** PCA for cluster group *PostNeol\_EuropeE*. PCA positions of individuals within

1733 specific clusters are highlighted with colored symbols, and connected with shaded hulls (from

1734 PCAs shown in Fig. S3d.7).

1735

1736

## PostNeol\_EuropeE

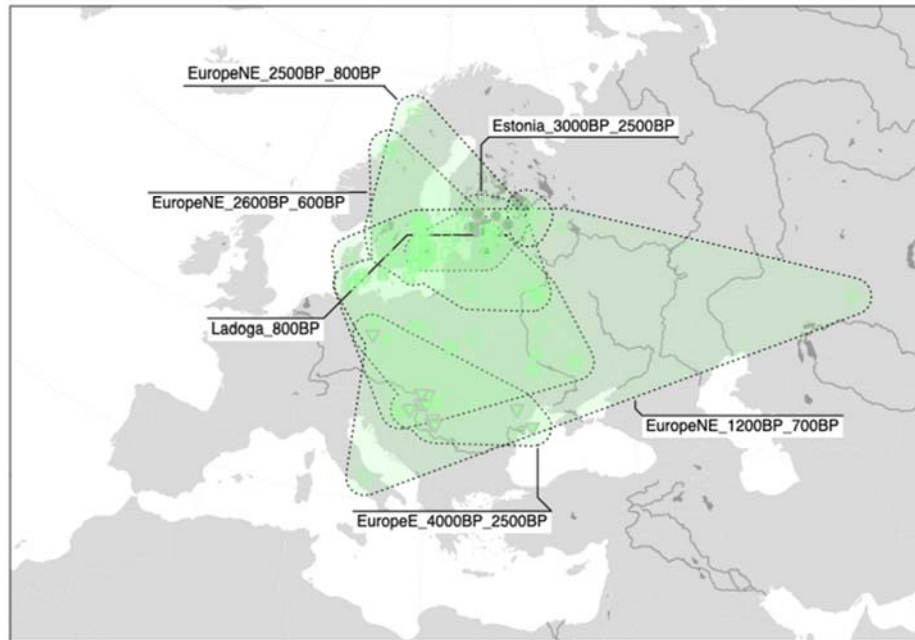

1737

1738 **Fig. S3f.28** Geographic distribution of individuals in cluster group *PostNeol\_EuropeE*.

1739 Geographic locations of individuals within specific clusters are highlighted with colored

1740 symbols, and connected with shaded hulls (from PCAs shown in Fig. S3d.7).

1741

1742

1743 Asia\_45000BP\_200BP

1744

1745 This global cluster includes diverse sets of clusters of individuals from the Southeast-, East-  
1746 and North Asia, broadly characterised by “east Eurasian” ancestry. The individual genetic  
1747 clusters are partitioned into a total of 12 cluster groups (Fig. S3f.29-44).

1748

1749

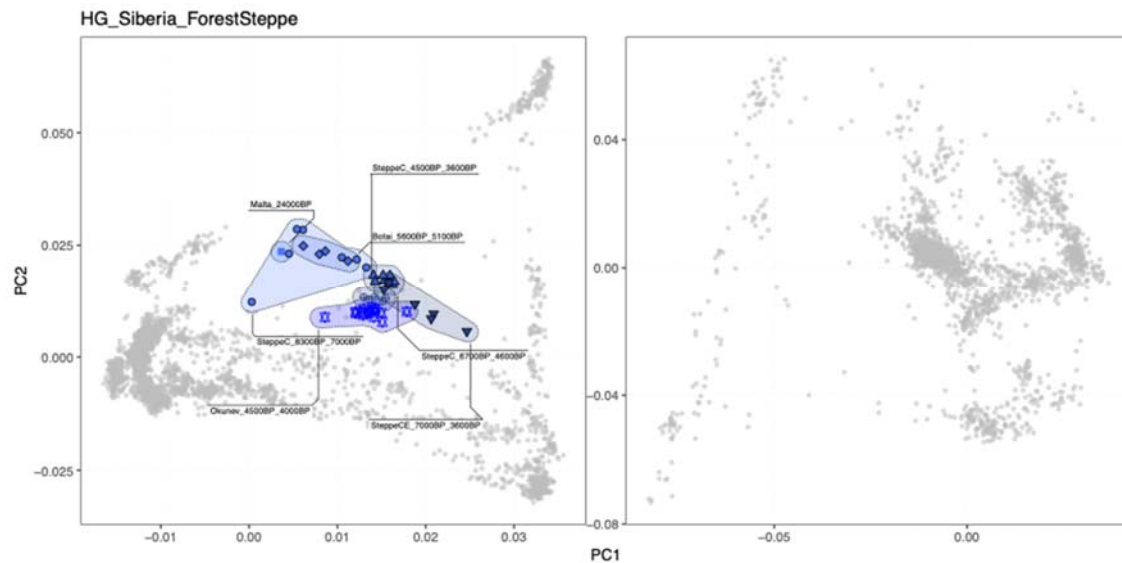

1750

1751 **Fig. S3f.29** PCA for cluster group *HG\_Siberia\_ForestSteppe*. PCA positions of  
1752 individuals within specific clusters are highlighted with colored symbols, and connected with  
1753 shaded hulls (from PCAs shown in Fig. S3d.7).

1754

## HG\_Siberia\_ForestSteppe

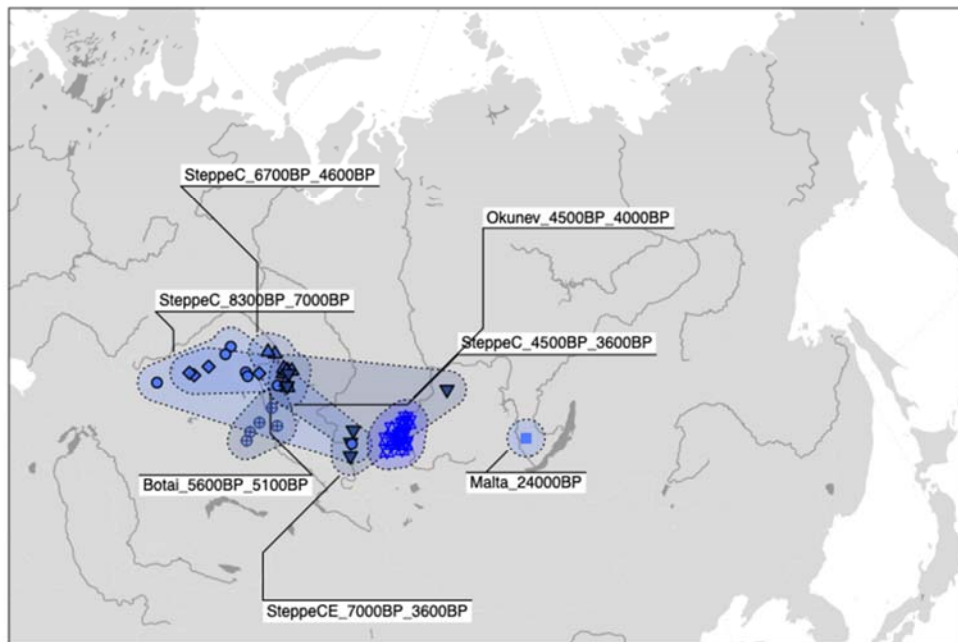

1755

1756 **Fig. S3f.30** Geographic distribution of individuals in cluster group

1757 *HG\_Siberia\_ForestSteppe*. Geographic locations of individuals within specific clusters are

1758 highlighted with colored symbols, and connected with shaded hulls (from PCAs shown in Fig.

1759 S3d.7).

1760

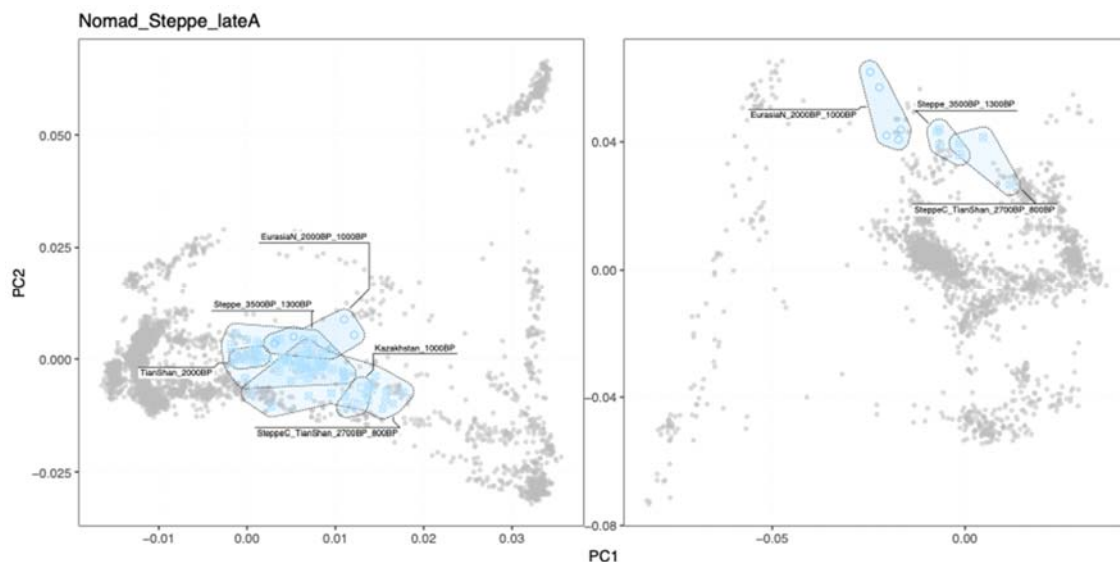

1761

1762 **Fig. S3f.31** PCA for cluster group *Nomad\_Steppe\_lateA*. PCA positions of individuals

1763 within specific clusters are highlighted with colored symbols, and connected with shaded

1764 hulls (from PCAs shown in Fig. S3d.7).

1765

1766

### Nomad\_Steppe\_lateA

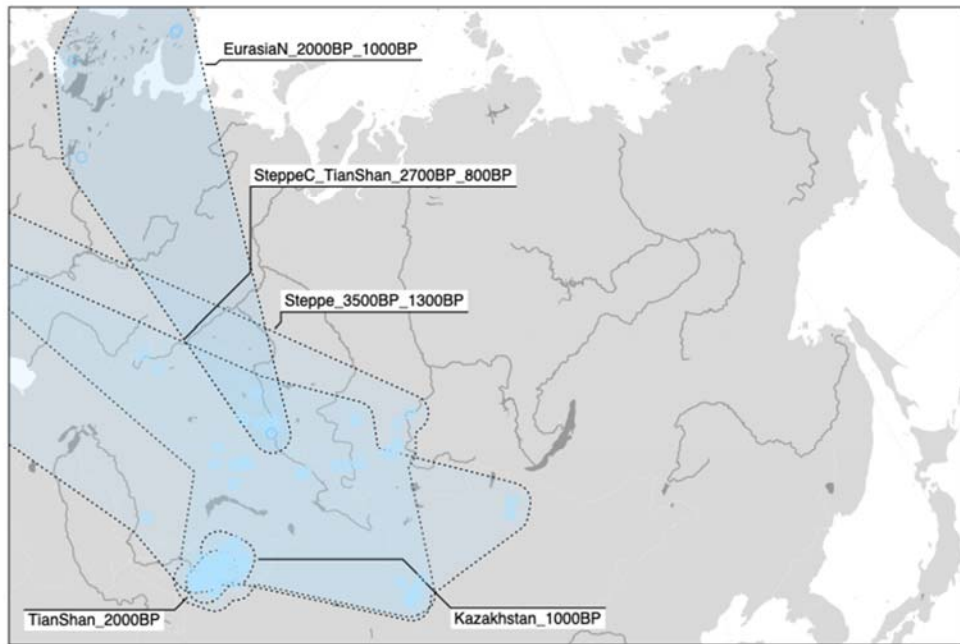

1767

1768 **Fig. S3f.32** Geographic distribution of individuals in cluster group

1769 *Nomad\_Steppe\_lateA*. Geographic locations of individuals within specific clusters are  
1770 highlighted with colored symbols, and connected with shaded hulls (from PCAs shown in Fig.  
1771 **S3d.7**).

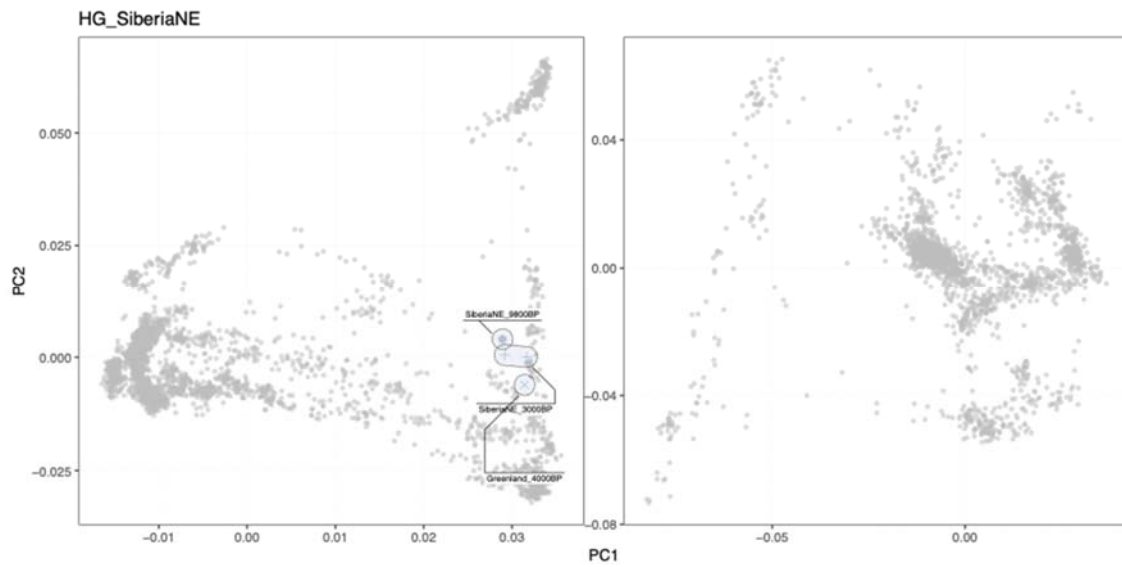

1772



1773 **Fig. S3f.33** PCA for cluster group *HG\_SiberiaNE*. PCA positions of individuals within  
1774 specific clusters are highlighted with colored symbols, and connected with shaded hulls (from  
1775 PCAs shown in Fig. S3d.7).  
1776  
1777

### HG\_SiberiaNE

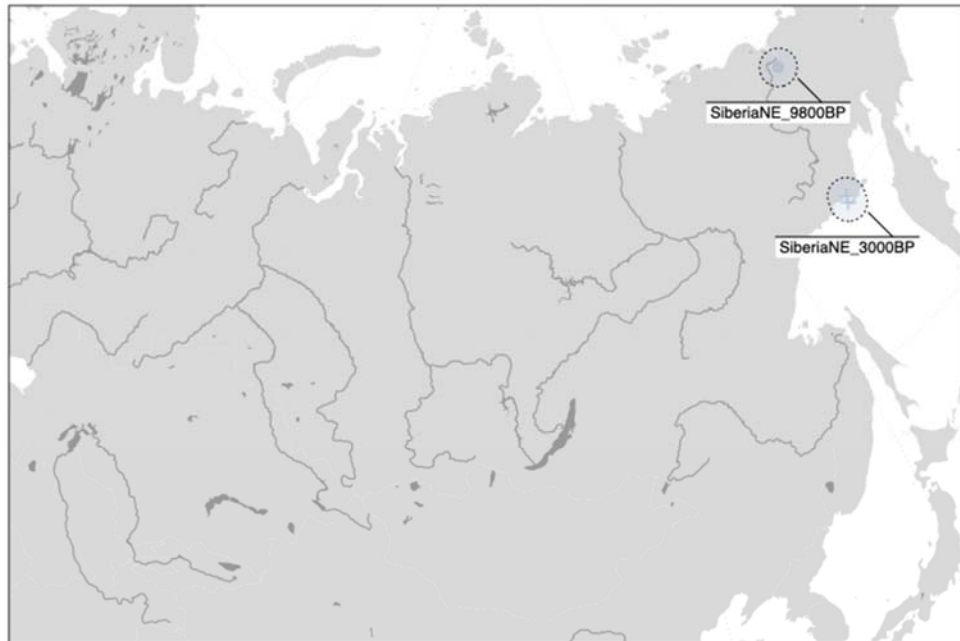

1778  
1779 **Fig. S3f.34** Geographic distribution of individuals in cluster group *HG\_SiberiaNE*.  
1780 Geographic locations of individuals within specific clusters are highlighted with colored  
1781 symbols, and connected with shaded hulls (from PCAs shown in Fig. S3d.7).  
1782

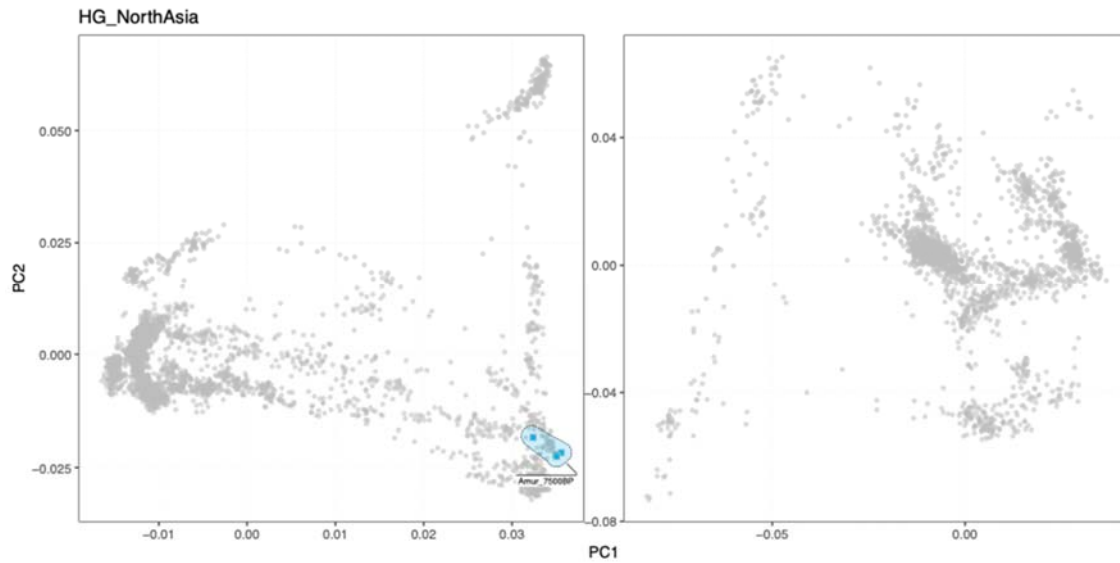

1783

1784 **Fig. S3f.35** PCA for cluster group *HG\_NorthAsia*. PCA positions of individuals within  
 1785 specific clusters are highlighted with colored symbols, and connected with shaded hulls (from  
 1786 PCAs shown in Fig. S3d.7).

1787

1788

**HG\_NorthAsia**

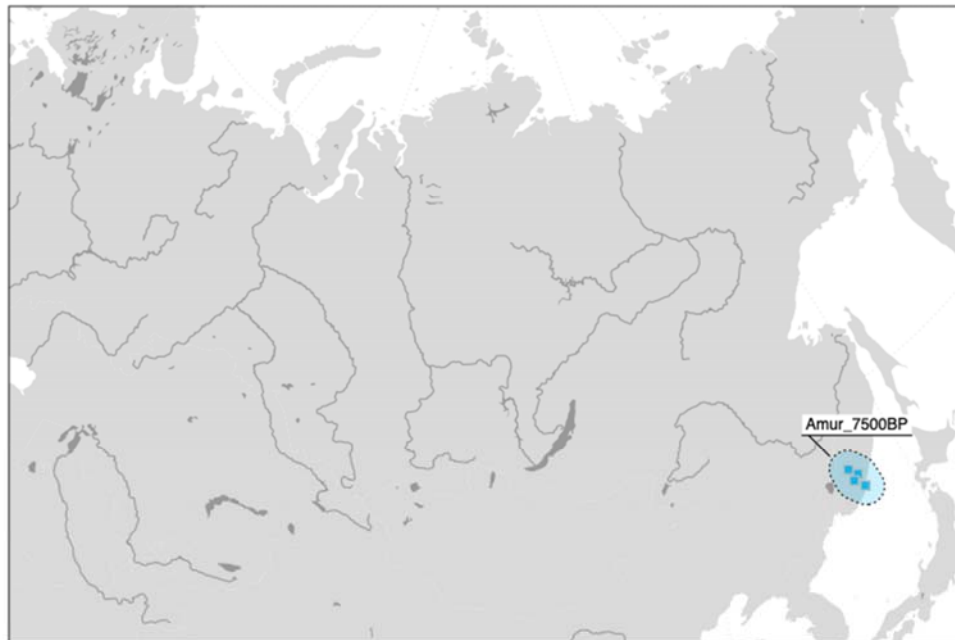

1789

1790 **Fig. S3f.36** Geographic distribution of individuals in cluster group *HG\_NorthAsia*.

1791 Geographic locations of individuals within specific clusters are highlighted with colored

1792 symbols, and connected with shaded hulls (from PCAs shown in Fig. S3d.7).

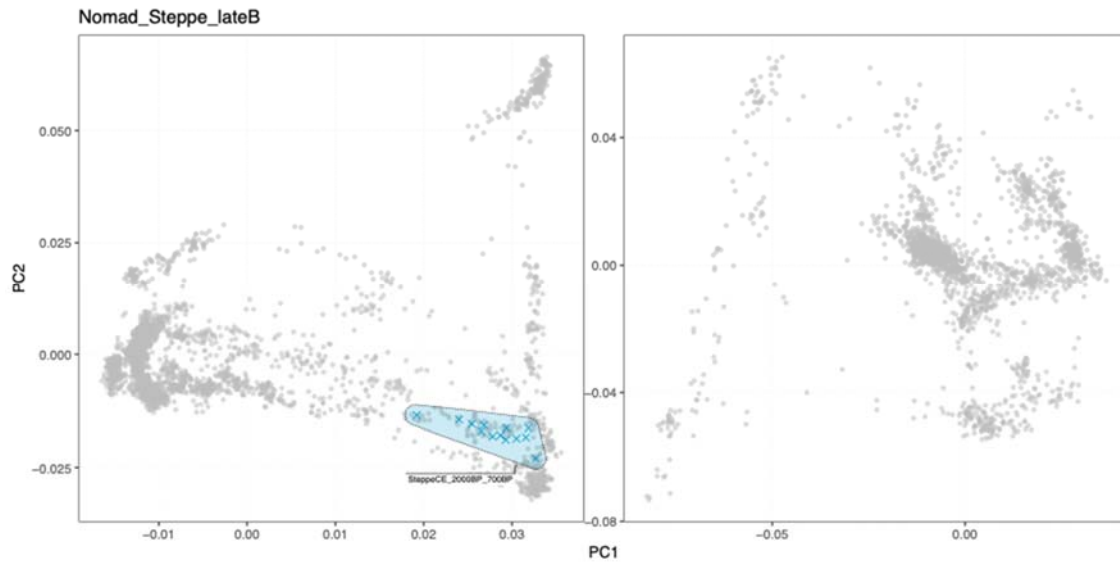

1793

1794

**Fig. S3f.37** PCA for cluster group *Nomad\_Steppe\_lateB*. PCA positions of individuals within specific clusters are highlighted with colored symbols, and connected with shaded hulls (from PCAs shown in Fig. S3d.7).

1795

1796

1797

1798

**Nomad\_Steppe\_lateB**

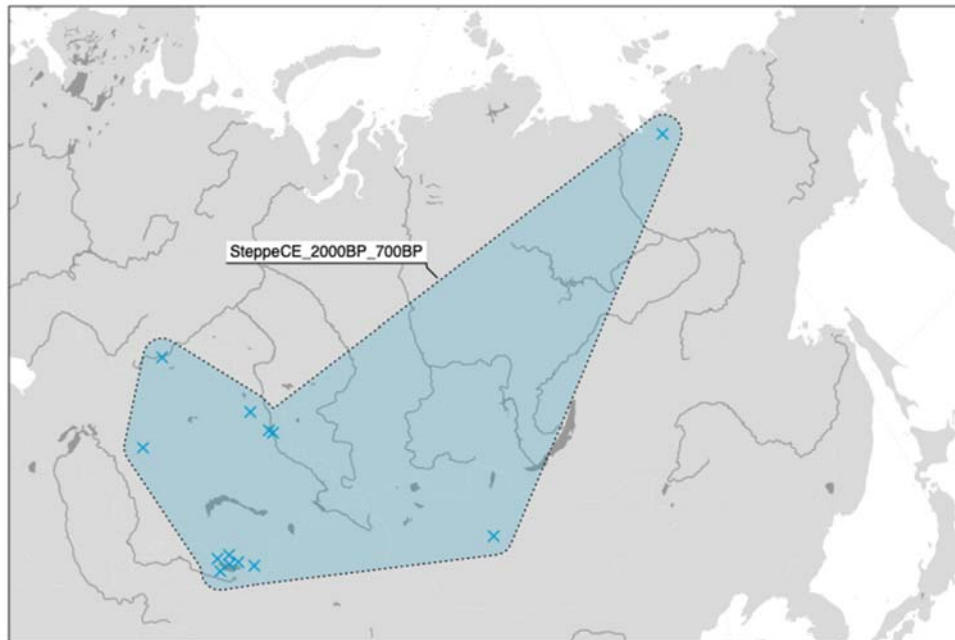

1799

1800

**Fig. S3f.38** Geographic distribution of individuals in cluster group

1801

*Nomad\_Steppe\_lateB*. Geographic locations of individuals within specific clusters are

1802 highlighted with colored symbols, and connected with shaded hulls (from PCAs shown in Fig.  
1803 S3d.7).  
1804

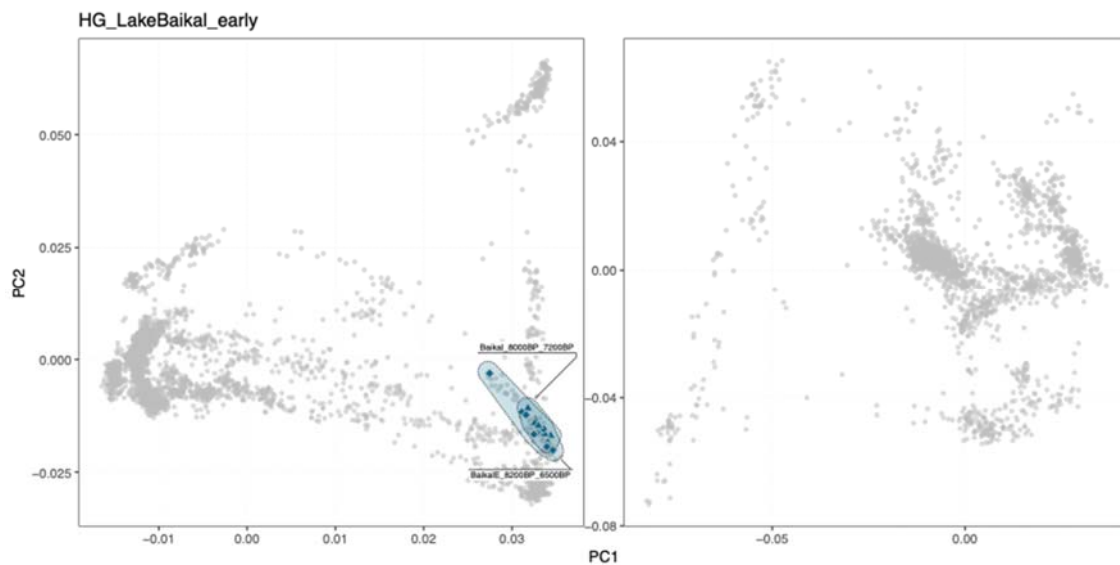

1805  
1806 **Fig. S3f.39** PCA for cluster group *HG\_LakeBaikal\_early*. PCA positions of individuals  
1807 within specific clusters are highlighted with colored symbols, and connected with shaded  
1808 hulls (from PCAs shown in Fig. S3d.7).  
1809  
1810

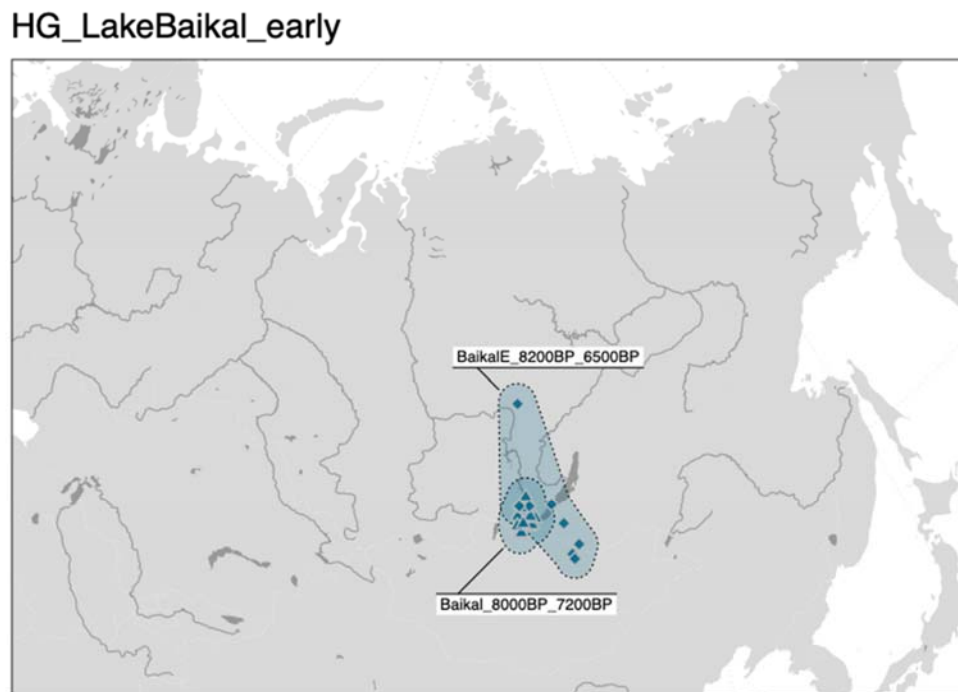

1811

1812 **Fig. S3f.40** Geographic distribution of individuals in cluster group  
1813 *HG\_LakeBaikal\_early*. Geographic locations of individuals within specific clusters are  
1814 highlighted with colored symbols, and connected with shaded hulls (from PCAs shown in Fig.  
1815 S3d.7).  
1816

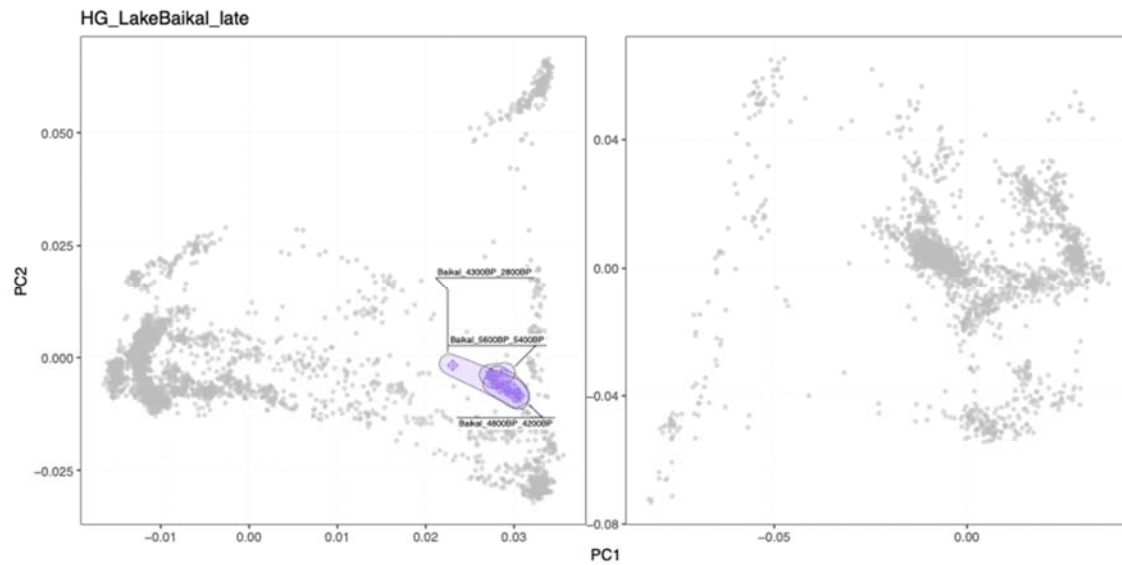

1817  
1818 **Fig. S3f.41** PCA for cluster group *HG\_LakeBaikal\_late*. PCA positions of individuals  
1819 within specific clusters are highlighted with colored symbols, and connected with shaded  
1820 hulls (from PCAs shown in Fig. S3d.7).  
1821

## HG\_LakeBaikal\_late

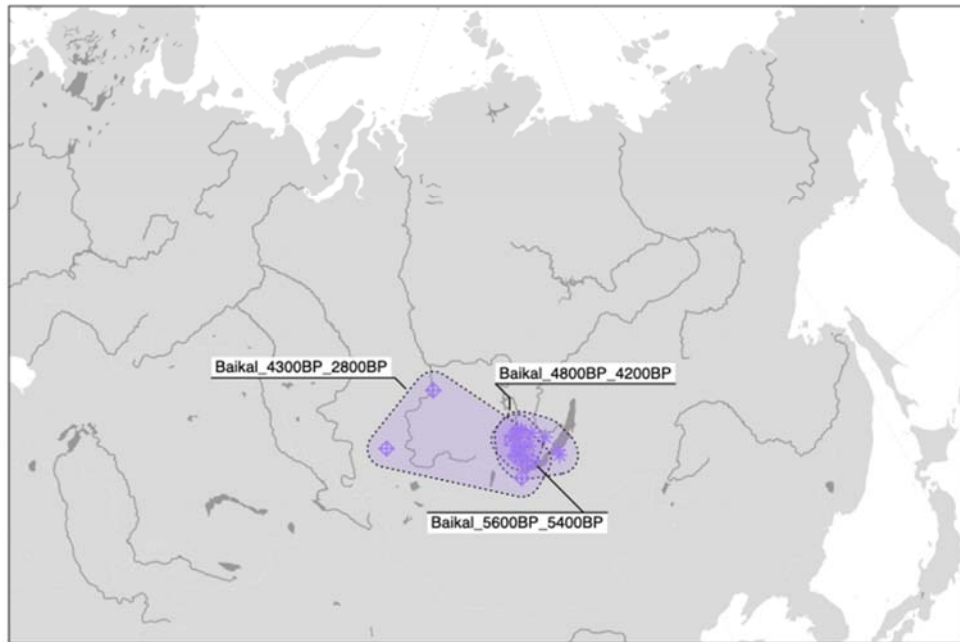

1822

1823 **Fig. S3f.42** Geographic distribution of individuals in cluster group

1824 *HG\_LakeBaikal\_late*. Geographic locations of individuals within specific clusters are

1825 highlighted with colored symbols, and connected with shaded hulls (from PCAs shown in Fig.

1826 S3d.7).

1827

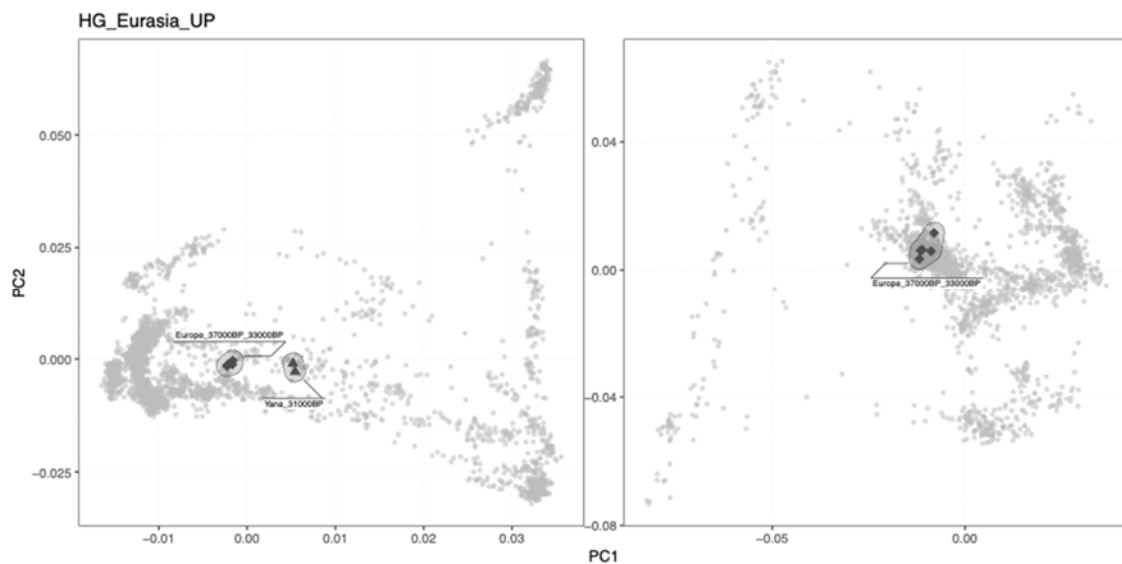

1828

1829 **Fig. S3f.43** PCA for cluster group *HG\_Eurasia\_UP*. PCA positions of individuals within

1830 specific clusters are highlighted with colored symbols, and connected with shaded hulls (from

1831 PCAs shown in Fig. S3d.7).

1832

1833

### HG\_Eurasia\_UP

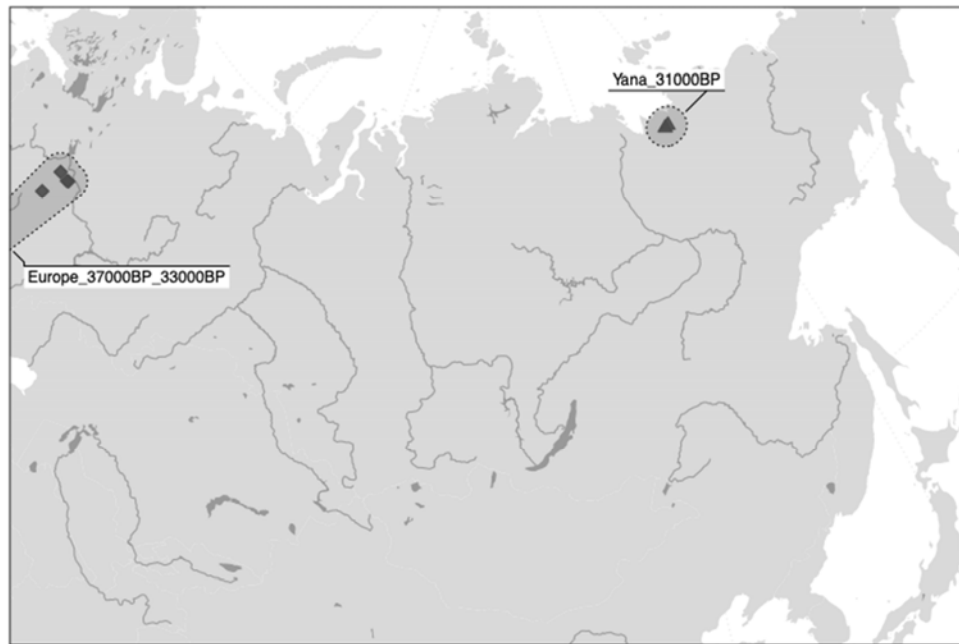

1834

1835 **Fig. S3f.44** Geographic distribution of individuals in cluster group *HG\_Eurasia\_UP*.

1836 Geographic locations of individuals within specific clusters are highlighted with colored

1837 symbols, and connected with shaded hulls (from PCAs shown in Fig. S3d.7).

1838

1839

1840 Runs of homozygosity and IBD sharing within clusters

1841 We quantified genetic relatedness within clusters by investigating runs of homozygosity and  
1842 pairwise IBD sharing among cluster individuals. The analyses showed broad differences in  
1843 patterns of genetic relatedness between different cluster groups across Eurasia, associated  
1844 with both spatiotemporal and subsistence contexts of the individuals. The highest amounts of  
1845 IBD sharing and ROH were generally found in clusters of individuals from hunter-gatherer  
1846 contexts. Individuals of comparable age from farming contexts showed lower sharing,  
1847 consistent with overall higher effective population sizes in farming communities compared to  
1848 forager groups (Fig. S3f.45-48).

1849

1850

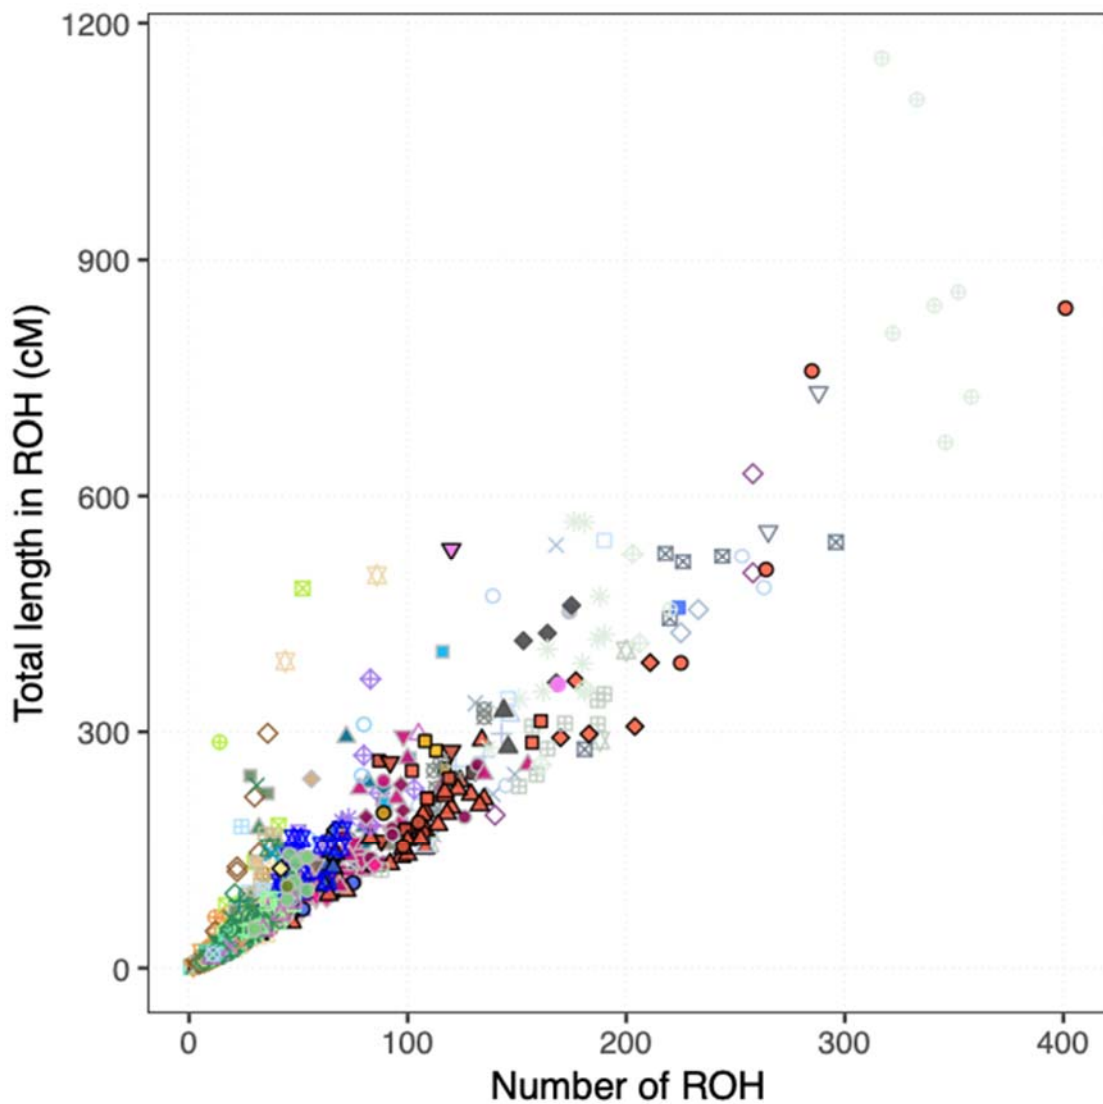

1851



1852 **Fig. S3f.45. Number and total length of ROH segments.** Plot shows the number and total  
 1853 length of ROH segments detected in the respective ancient individual. Symbol colour and  
 1854 shape indicated genetic cluster membership.  
 1855  
 1856

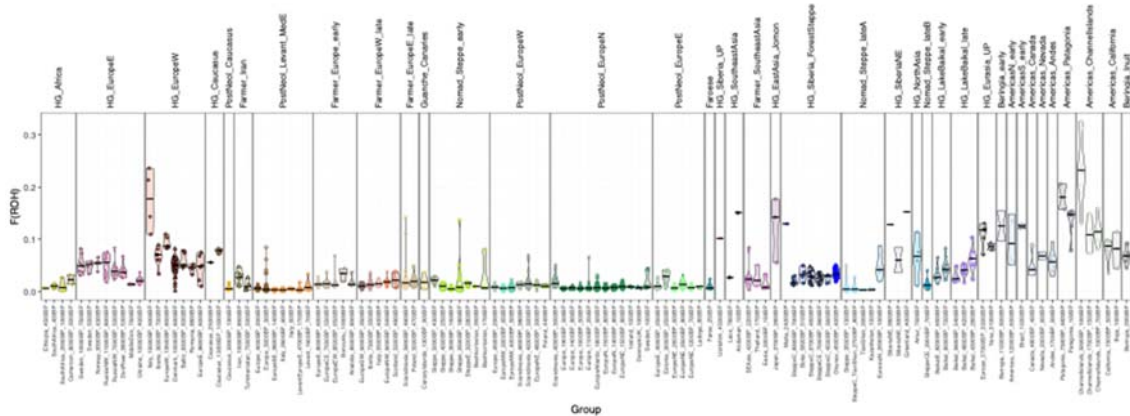

1857  
 1858 **Fig. S3f.46. Distribution of F(ROH).** Violin plots and symbols showing the distributions of  
 1859 F(ROH) within genetic clusters.  
 1860

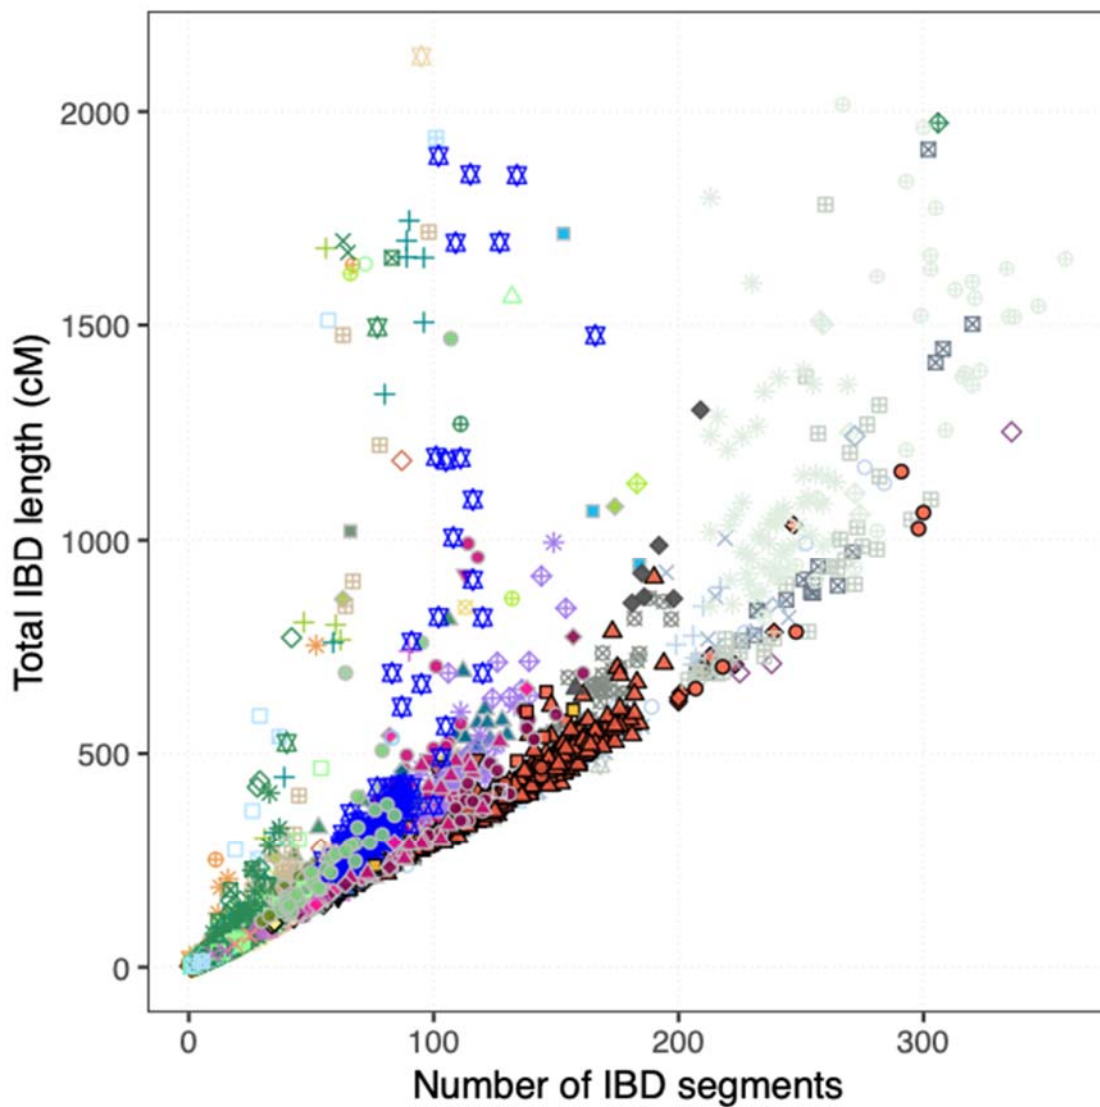

1862

1863

1864

1865

1866

1867

1868

1869

**Fig. S3f.47. Number and total length of IBD segments.** Plot shows the number and total length of IBD segments detected in the respective pair of individuals. Symbol colour and shape indicated genetic cluster membership.

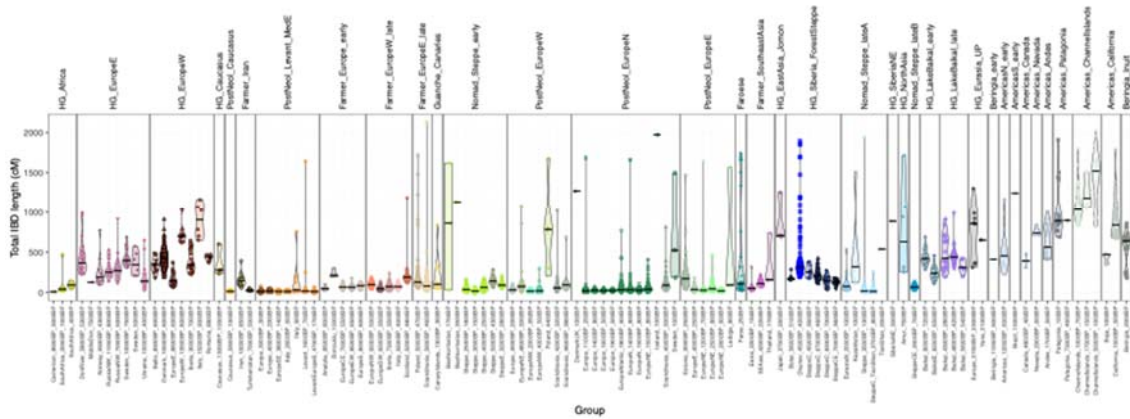

1870

1871 **Fig. S3f.48.** Violin plots and symbols showing the distributions of total IBD sharing within  
 1872 genetic clusters.

1873

1874

1875 Mixture models

1876 We used IBD “painting profiles” to model sets of target individuals as mixtures of putative  
 1877 source groups. To investigate how these IBD profiles are capturing underlying population  
 1878 structure, we compared their similarities using the “total-variation- distance“ (TVD)<sup>12,13</sup>  
 1879 measure. We calculated pairwise TVD values for each pair of individual profiles in the  
 1880 combined ancient and modern dataset, as well as for average profiles aggregated across all  
 1881 individuals within a genetic cluster. Our results show that the painting profiles readily  
 1882 distinguish both broad- and fine-scale genetic differentiation among the individuals and  
 1883 genetic clusters (**Fig. S3f.49,50**).

1884

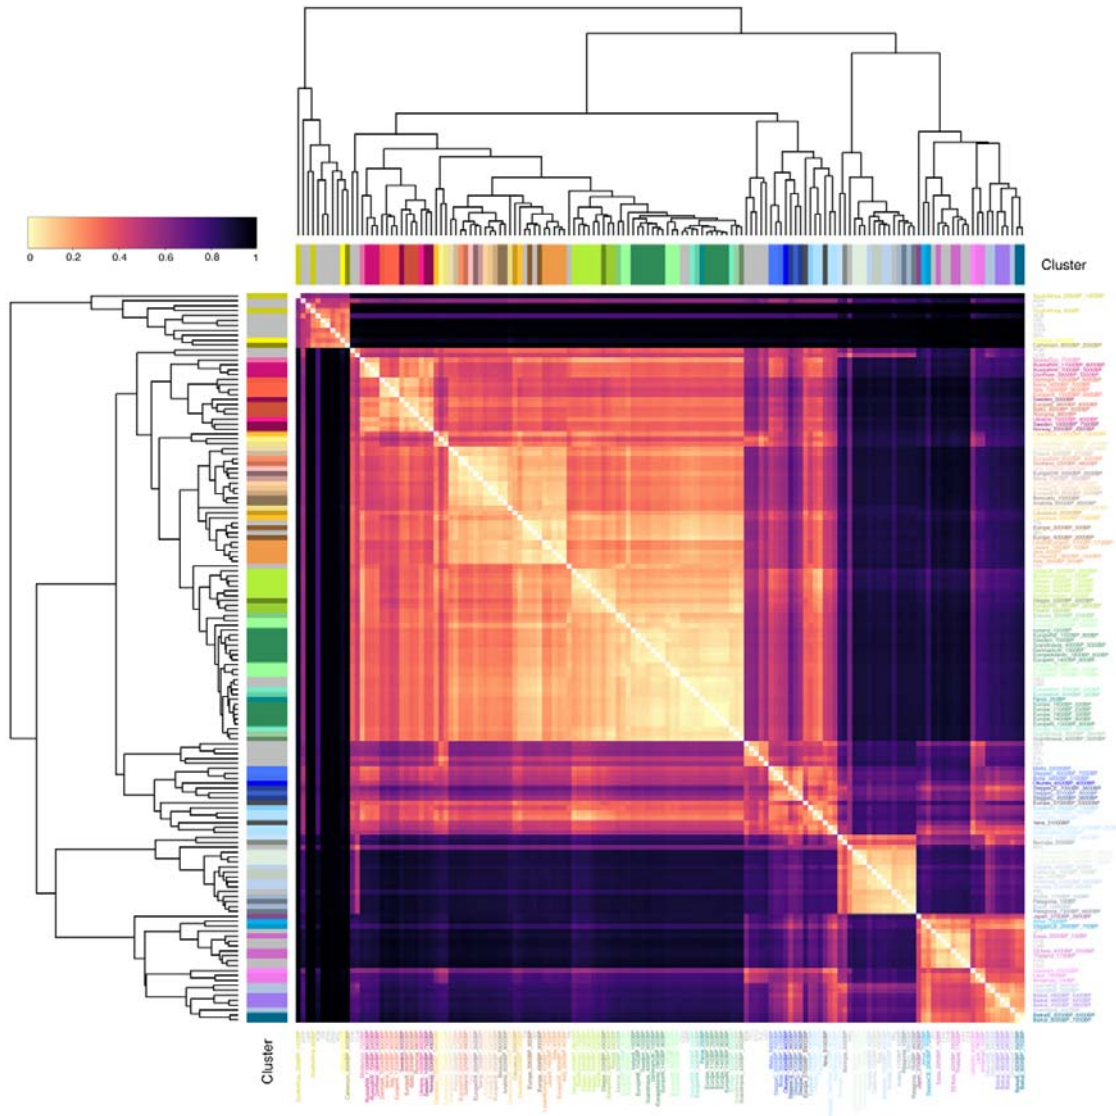

1885  
 1886  
 1887  
 1888  
 1889  
 1890  
 1891  
 1892

**Fig. S3f.49. Cluster IBD painting profile distances.** Heatmap showing pairwise distance between genetic cluster IBD painting profiles, measured using TVD. Colored bars indicate cluster membership.

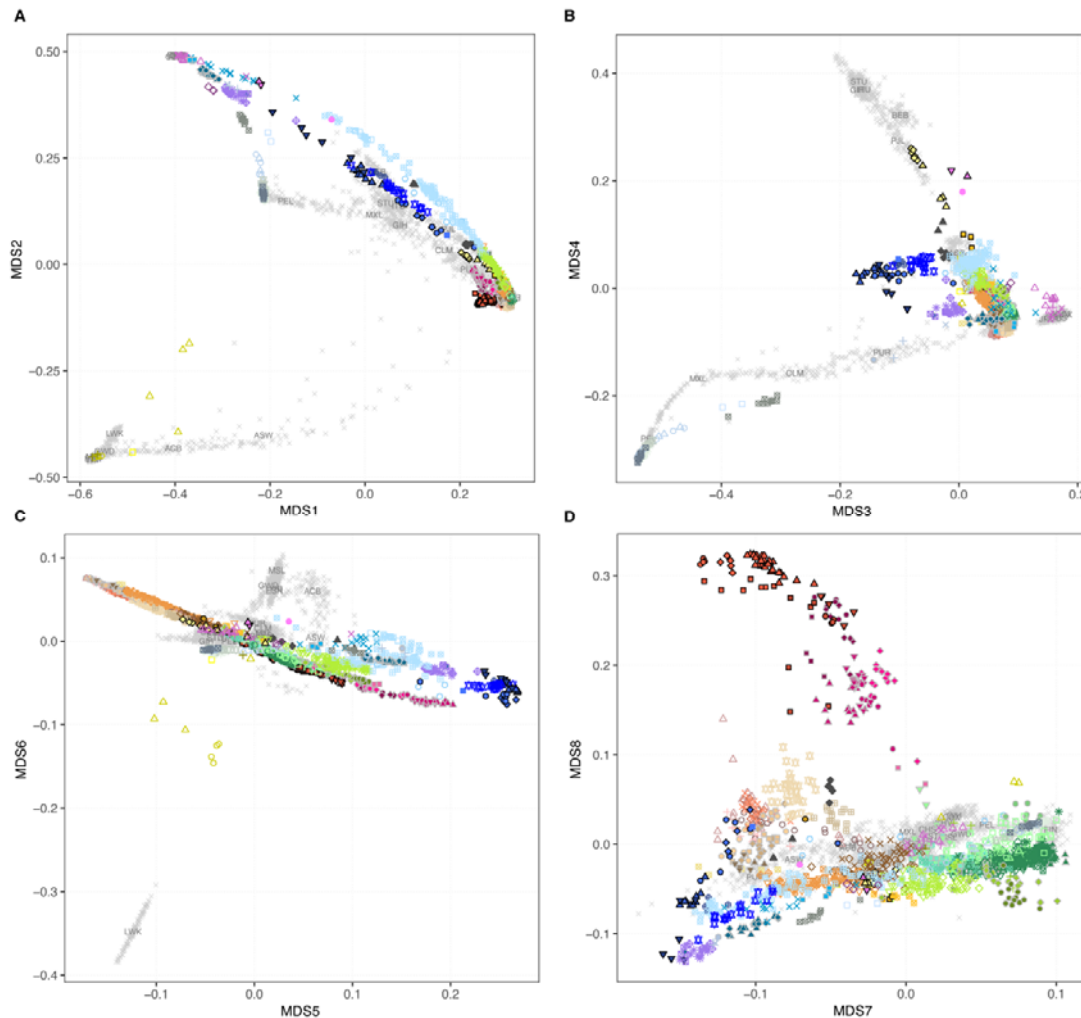

1893

1894

**Fig. S3f.49. Genetic structure inferred from IBD painting profiles.** (A)-(D) Plots show the first 8 dimensions of a multidimensional scaling (MDS) of individual painting profile TVDs across ancient and modern individuals. Genetic cluster membership for ancient individuals is indicated by symbol colour and shape. Present-day individuals are indicated with grey crosses, with labels indicating population median coordinates.

1899

1900

1901

We used these painting profiles in supervised modelling of target individuals as mixtures from different sets of putative source groups (Fig. S3f.51; Supplementary Table VIII). In each source set analysis, we computed source group painting profiles by averaging the profiles of the included individuals within each source group. We then estimated the mixture and proportions of source profiles that best fits the profile observed in the target individuals, using non-negative least squares (Fig. S3f.52, 53; Supplementary Tables IX-XIV)

1907

1908

1909

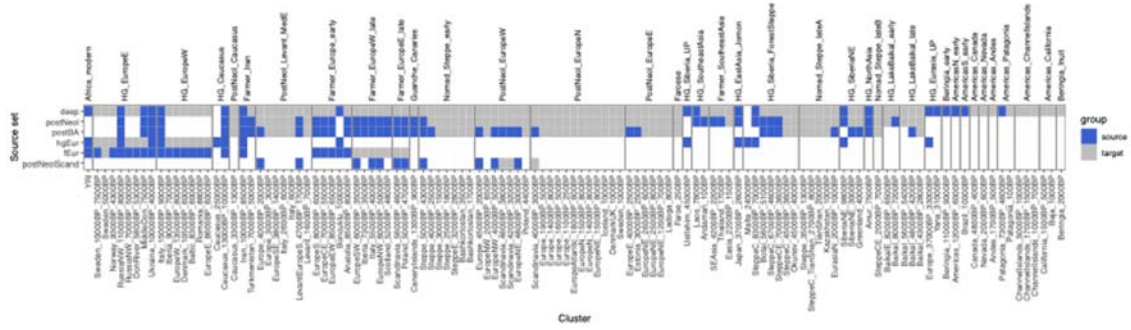

1910

1911

**Fig. S3f.52. Mixture model source and target groups.** Matrix showing the source and

1912

target groups used across the five source set analyses.

1913

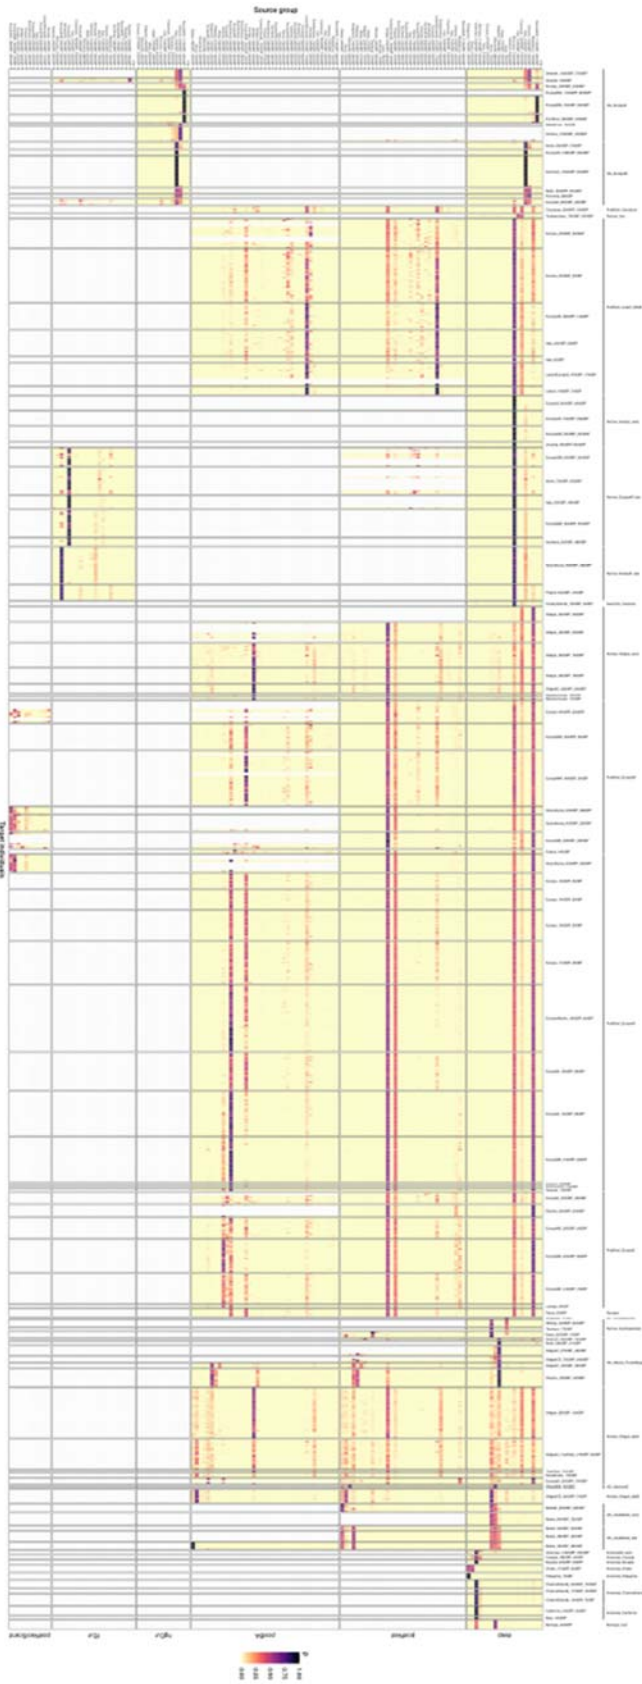

1916 **Fig. S3f.52. Mixture model results.** Heatmap showing estimated ancestry proportions for  
1917 target individuals (columns) from source groups (rows), across the five source set analyses.  
1918



1919   References

- 1920       1.   Browning, B. L. & Browning, S. R. Detecting Identity by Descent and Estimating  
1921       Genotype Error Rates in Sequence Data. *Am. J. Hum. Genet.* **93**, 840–851 (2013).  
1922       2.   Browning, S. R. & Browning, B. L. Accurate Non-parametric Estimation of Recent  
1923       Effective Population Size from Segments of Identity by Descent. *Am. J. Hum. Genet.* **97**,  
1924       404–418 (2015).  
1925       3.   Lawrence, M. *et al.* Software for Computing and Annotating Genomic Ranges. *PLOS*  
1926       *Comput. Biol.* **9**, e1003118 (2013).  
1927       4.   Greenbaum, G., Rubin, A., Templeton, A. R. & Rosenberg, N. A. Network-based  
1928       hierarchical population structure analysis for large genomic data sets. *Genome Res.* **29**,  
1929       2020–2033 (2019).  
1930       5.   Csardi, G. & Nepusz, T. The igraph software package for complex network research.  
1931       *InterJournal Complex Systems*, 1695 (2006).  
1932       6.   Traag, V. A., Waltman, L. & van Eck, N. J. From Louvain to Leiden: guaranteeing  
1933       well-connected communities. *Sci. Rep.* **9**, 1–12 (2019).  
1934       7.   Lawson, D. J., Hellenthal, G., Myers, S. & Falush, D. Inference of Population  
1935       Structure using Dense Haplotype Data. *PLoS Genet* **8**, e1002453 (2012).  
1936       8.   Hofmanová, Z. *et al.* Early farmers from across Europe directly descended from  
1937       Neolithic Aegeans. *Proc. Natl. Acad. Sci.* **113**, 6886–6891 (2016).  
1938       9.   Hellenthal, G. *et al.* A Genetic Atlas of Human Admixture History. *Science* **343**, 747–  
1939       751 (2014).  
1940       10. Soetaert, K., Meersche, K. V. den & Oevelen, D. van. *limSolve: Solving Linear*  
1941       *Inverse Models.* (2009).  
1942       11. Eisenmann, S. *et al.* Reconciling material cultures in archaeology with genetic data:  
1943       The nomenclature of clusters emerging from archaeogenomic analysis. *Sci. Rep.* **8**,  
1944       13003 (2018).  
1945       12. Leslie, S. *et al.* The fine-scale genetic structure of the British population. *Nature* **519**,  
1946       309–314 (2015).  
1947       13. Dorp, L. van *et al.* Evidence for a Common Origin of Blacksmiths and Cultivators in  
1948       the Ethiopian Ari within the Last 4500 Years: Lessons for Clustering-Based Inference.  
1949       *PLOS Genet.* **11**, e1005397 (2015).  
1950

### 1951 3g) Selecting non-British individuals from the UK Biobank

1952 Will Barrie<sup>1</sup> and Dan Lawson<sup>2</sup>

1953 <sup>1</sup>Zoology Department, University of Cambridge, UK.

1954 <sup>2</sup>School of Mathematics and Integrative Epidemiology Unit, University of Bristol, UK.

1955

#### 1956 Introduction

1957 The UK Biobank (UKB) contains approximately 40,000 individuals not born in the UK.  
1958 Because many of these individuals are admixed or British, we set up a pipeline to (1) exclude  
1959 genetically British-like individuals and (2) select individuals of a typical genetic ancestral  
1960 background for each country, in order to investigate the genetic contribution of each ancient  
1961 ancestry to modern European, Asian and African populations.

#### 1962 Methods

1963 For individuals from each country in Europe, Asia and Africa but not the UK, (Data-Field  
1964 1647: Country of birth (UK/elsewhere) and Data-Field 20115: Country of Birth (non-UK  
1965 origin)), we ran two density-based scans using Scikit-learn's <sup>1</sup> DBSCAN method (Density-  
1966 Based Spatial Clustering of Applications with Noise) on a distance matrix constructed using  
1967 the first 18 PCs<sup>2</sup>, weighted by their Eigenvalues. This algorithm finds cores of high density  
1968 within a distance matrix, which can be any shape, and can include nearby non-core points.  
1969 The eps parameter can be adjusted to determine how strict the clustering is. This is  
1970 preferable to using visual PC cut-offs, for which it is difficult to include higher PCs; and k-  
1971 means clustering, which assumes clusters are convex and all points must be clustered.

1972

1973 In the first scan, designed to remove individuals with British-like ancestry who were born  
1974 abroad, individuals from a given country were combined with 8,000 random white British  
1975 individuals, and the clustering algorithm was run on the combined data. Any individuals born  
1976 abroad who clustered with the white British were excluded (eps=60). For countries that are  
1977 very similar to Britain in ancestry (e.g. Germany, Denmark) this is a balance between  
1978 excluding individuals who are genuinely British (very common in the 'German' samples) but  
1979 not biasing the samples away from British-like ancestry.

1980

1981 In the second scan, the remaining individuals were clustered, and the largest cluster was  
1982 chosen to represent a typical ancestry for that country. The appropriate eps value (i.e. how  
1983 strict the clustering should be) is a reflection of the genetic diversity of a country, and so was

1984 adjusted manually to reflect this (Figure S3g.1). In a minority of cases, the major cluster was  
1985 not the indigenous ancestral background, and so the second-largest was chosen (for  
1986 example, in Kenya the largest cluster was individuals of Indian origin). All selections were  
1987 visually verified. Countries that had no obvious main cluster (usually due to low sample  
1988 numbers) were excluded; any country with 3 or fewer individuals was also excluded.

1989

1990 In order to select Irish individuals (Republic of Ireland and Northern Ireland), step 1 was  
1991 skipped but step 2 was run with relatively tight parameters, in both cases excluding  
1992 approximately 20% of individuals.

1993

1994 In order to test the effectiveness of the pipeline at selecting individuals of a similar ancestral  
1995 background, we looked at the variance in the genome-wide painting proportions for each  
1996 country. Countries with high variance would indicate recent admixture.

1997

## 1998 Results

1999 This pipeline selected 24,511 individuals from 126 countries. These selected samples were  
2000 painted using a reference/donor panel of ancient individuals (Supplementary Note S3h).

2001

2002 The countries that had high variance in ancestry proportions among individuals (and  
2003 therefore likely that the DBSCAN was not effective in choosing individuals of a similar  
2004 ancestral background) were Kazakhstan, Yemen, Egypt, Seychelles. Results for these  
2005 countries should be interpreted with caution.

2006

## 2007 Discussion

2008 The UKB represents an important source of data for white British people but also for people  
2009 from other countries globally. Usually, researchers restrict themselves to the white British  
2010 cohort, but here we develop a method to select individuals from other countries. This  
2011 transforms the UKB from a resource that is informative about British ancestry to one that can  
2012 be used to make inferences about populations worldwide.

2013

2014

| Country | Number of individuals | Number in wb cluster | eps value | Final number selected |
|---------|-----------------------|----------------------|-----------|-----------------------|
| Kenya   | 1684                  | 277                  | 800       | 110                   |

|                 |      |      |      |      |
|-----------------|------|------|------|------|
| Netherlands     | 491  | 300  | 230  | 153  |
| Switzerland     | 175  | 19   | 230  | 143  |
| India           | 4012 | 358  | 230  | 3107 |
| Belgium         | 158  | 75   | 230  | 70   |
| Singapore       | 502  | 262  | 230  | 86   |
| Palestine       | 60   | 13   | 700  | 28   |
| Nigeria         | 1159 | 90   | 800  | 1016 |
| Hungary         | 105  | 0    | 230  | 79   |
| Czech Republic  | 126  | 2    | 230  | 107  |
| Ghana           | 929  | 35   | 700  | 848  |
| Sri Lanka       | 744  | 54   | 230  | 620  |
| Egypt           | 313  | 82   | 600  | 223  |
| Japan           | 266  | 12   | 230  | 242  |
| Hong Kong       | 648  | 107  | 230  | 448  |
| Germany         | 2136 | 1044 | 230  | 1045 |
| Turkey          | 182  | 5    | 400  | 160  |
| Iran            | 540  | 16   | 230  | 469  |
| South Africa    | 1364 | 488  | 700  | 57   |
| Angola          | 56   | 2    | 700  | 22   |
| Cameroon        | 54   | 5    | 230  | 44   |
| Pakistan        | 1439 | 47   | 230  | 1332 |
| Zimbabwe        | 750  | 252  | 700  | 254  |
| Channel Islands | 121  | 94   | 230  | 24   |
| Bangladesh      | 246  | 4    | 230  | 225  |
| Tanzania        | 425  | 84   | 1000 | 25   |

|                   |     |     |     |     |
|-------------------|-----|-----|-----|-----|
| Sierra Leone      | 230 | 5   | 800 | 199 |
| Portugal          | 320 | 18  | 230 | 275 |
| Uganda            | 616 | 73  | 700 | 126 |
| Poland            | 637 | 2   | 230 | 619 |
| China             | 413 | 26  | 230 | 371 |
| Cyprus            | 328 | 114 | 230 | 160 |
| Italy             | 821 | 16  | 230 | 789 |
| Bulgaria          | 71  | 2   | 230 | 65  |
| Israel            | 87  | 10  | 300 | 56  |
| France            | 856 | 103 | 230 | 690 |
| Malta             | 365 | 170 | 230 | 135 |
| Myanmar (Burma)   | 124 | 23  | 400 | 31  |
| Philippines       | 333 | 8   | 230 | 310 |
| Iraq              | 337 | 17  | 400 | 298 |
| Finland           | 158 | 2   | 230 | 154 |
| Libya             | 110 | 42  | 800 | 35  |
| Norway            | 134 | 19  | 230 | 104 |
| Russia            | 159 | 0   | 300 | 124 |
| Nepal             | 161 | 0   | 230 | 119 |
| Denmark           | 231 | 137 | 230 | 86  |
| Spain             | 355 | 2   | 230 | 339 |
| Serbia/Montenegro | 56  | 0   | 230 | 55  |
| Algeria           | 92  | 1   | 600 | 68  |
| Sicily            | 3   | 0   | 230 | 2   |
| Afghanistan       | 112 | 1   | 500 | 103 |

|                          |     |     |      |     |
|--------------------------|-----|-----|------|-----|
| Gibraltar                | 77  | 34  | 230  | 32  |
| Lebanon                  | 77  | 13  | 500  | 50  |
| Sudan                    | 117 | 21  | 800  | 61  |
| Morocco                  | 93  | 3   | 800  | 66  |
| Greece                   | 131 | 5   | 230  | 116 |
| Austria                  | 196 | 20  | 230  | 171 |
| Ukraine                  | 62  | 1   | 400  | 54  |
| Congo                    | 167 | 11  | 800  | 146 |
| Lithuania                | 72  | 0   | 230  | 66  |
| Vietnam                  | 74  | 0   | 230  | 69  |
| Romania                  | 68  | 0   | 230  | 61  |
| Malawi                   | 111 | 25  | 800  | 10  |
| Gambia                   | 42  | 0   | 800  | 38  |
| Equatorial Guinea        | 4   | 0   | 800  | 2   |
| Thailand                 | 104 | 6   | 300  | 87  |
| Indonesia                | 62  | 7   | 400  | 35  |
| Central African Republic | 42  | 6   | 800  | 14  |
| Sweden                   | 216 | 9   | 230  | 196 |
| Jordan                   | 15  | 1   | 600  | 9   |
| Croatia                  | 46  | 0   | 230  | 45  |
| Ethiopia                 | 81  | 8   | 800  | 57  |
| Somalia                  | 119 | 2   | 800  | 78  |
| Zambia                   | 246 | 101 | 800  | 56  |
| Tunisia                  | 27  | 2   | 900  | 14  |
| Rwanda                   | 25  | 1   | 1000 | 19  |

|                        |     |    |      |    |
|------------------------|-----|----|------|----|
| Yemen                  | 108 | 38 | 2000 | 56 |
| Burundi                | 26  | 3  | 1000 | 19 |
| Eritrea                | 54  | 4  | 800  | 44 |
| Syria                  | 31  | 0  | 800  | 27 |
| Luxembourg             | 7   | 0  | 230  | 6  |
| Cambodia               | 8   | 1  | 1500 | 7  |
| Macau (Macao)          | 8   | 0  | 500  | 6  |
| Seychelles             | 46  | 1  | 2000 | 23 |
| Liberia                | 22  | 3  | 800  | 15 |
| Kuwait                 | 31  | 16 | 800  | 5  |
| Taiwan                 | 26  | 1  | 230  | 23 |
| Niger                  | 5   | 0  | 800  | 2  |
| Georgia                | 4   | 0  | 400  | 3  |
| Iceland                | 19  | 4  | 230  | 15 |
| Macedonia              | 18  | 0  | 230  | 17 |
| Ivory Coast            | 32  | 0  | 800  | 29 |
| Mongolia               | 6   | 0  | 400  | 6  |
| Kazakhstan             | 13  | 0  | 4000 | 13 |
| Brunei                 | 19  | 4  | 400  | 8  |
| Latvia                 | 53  | 0  | 300  | 52 |
| Bosnia and Herzegovina | 41  | 0  | 230  | 41 |
| Guinea                 | 11  | 0  | 800  | 6  |
| Slovenia               | 11  | 0  | 230  | 11 |
| Azerbaijan             | 6   | 0  | 500  | 5  |
| Slovakia               | 35  | 0  | 230  | 30 |

|                                |    |   |      |    |
|--------------------------------|----|---|------|----|
| Kyrgyzstan                     | 4  | 0 | 2000 | 3  |
| Estonia                        | 15 | 0 | 230  | 14 |
| Senegal                        | 12 | 0 | 800  | 7  |
| South Korea                    | 26 | 0 | 230  | 24 |
| Togo                           | 10 | 0 | 230  | 9  |
| Armenia                        | 5  | 0 | 600  | 5  |
| Albania                        | 12 | 0 | 230  | 12 |
| British Indian Ocean Territory | 10 | 2 | 500  | 4  |
| Kurdistan                      | 2  | 0 | 600  | 2  |
| North Korea                    | 6  | 0 | 230  | 5  |
| Laos                           | 3  | 0 | 500  | 3  |
| Lesotho                        | 2  | 0 | 400  | 2  |
| Serbia                         | 2  | 0 | 230  | 2  |
| Republic of Kosovo             | 6  | 0 | 230  | 6  |
| Botswana                       | 7  | 1 | 800  | 4  |
| Uzbekistan                     | 3  | 0 | 5000 | 3  |
| Kashmir                        | 3  | 0 | 300  | 3  |
| Turkmenistan                   | 1  | 0 | 230  | 1  |
| Belarus                        | 6  | 0 | 230  | 4  |
| Tibet                          | 1  | 0 | 230  | 1  |
| Crete                          | 1  | 0 | 230  | 1  |
| Moldova                        | 1  | 0 | 230  | 1  |
| Tajikistan                     | 1  | 0 | 230  | 1  |

2015 **Table S3g.1. Parameters for selection of individuals in the UKB born in a given**  
2016 **country of a 'typical ancestral background'**. This shows the initial number of individuals  
2017 coded as being born in a country; the number removed because they clustered with the  
2018 white British; the eps value for selecting the main cluster; and the number of individuals in



2019 the final selected cluster. Countries with fewer than 3 individuals in the final cluster, or no  
2020 obvious main cluster, were discarded. The eps value is dependent on the genetic diversity of  
2021 the population being selected, and was chosen manually and visually checked. In most but  
2022 not all cases the largest cluster was chosen.

## 2023 References

2024 1. Pedregosa, F. *et al.* Scikit-learn: Machine learning in Python. *The Journal of Machine*  
2025 *Learning Research* **12**, 2825–2830 (2011).

2026 2. Bycroft, C. *et al.* The UK Biobank resource with deep phenotyping and genomic data.  
2027 *Nature* **562**, 203–209 (2018).

2028

## 2029 3h) Painting the UK BioBank

2030

2031 Will Barrie<sup>1</sup> and Dan Lawson<sup>2</sup>

2032 <sup>1</sup>Zoology Department, University of Cambridge, UK.

2033 <sup>2</sup>School of Mathematics and Integrative Epidemiology Unit, University of Bristol, UK.

2034

## 2035 Introduction

2036 Here, we develop new methods to use Chromopainter <sup>1</sup> on a biobank scale to ‘paint’ modern  
2037 genomes from the UK Biobank (UKB) using ancient genomes, grouped into reference  
2038 populations, as donors. Painting was done following the pipeline of Margaryan *et al.* <sup>2</sup> based  
2039 on GLOBETROTTER <sup>3</sup>, and admixture proportions were estimated using Non-Negative  
2040 Least squares. These results (technically most recent coalescences) are used as a proxy for  
2041 ancestry. We store both genome-wide and local ancestry (i.e. per variant per individual)  
2042 results.

2043

## 2044 Methods

### 2045 Painting pipeline introduction

2046 The process of painting consists of forming a reference/donor panel consisting of ancient  
2047 individuals of as pure ancestry as possible, having undergone QC and clustering using

2048 fineSTRUCTURE. The target/recipient panel and reference/donor panel are then filtered for  
2049 variants, merged, and the target panel is painted using the reference panel as donors.  
2050

#### 2051 Reference/donor panel formation

2052 We used imputed best guess haplotypes filtered for imputation information score  
2053 (FORMAT/INFO) above 0.5. Samples were selected based on IBD-sharing, visual PCA  
2054 inspection, and fineSTRUCTURE analysis (unsupervised clustering based on the coancestry  
2055 matrix output of ChromoPainter; [Figure S3h.1](#)); low coverage, contaminated, and related  
2056 individuals were excluded. The aim was to group samples into as pure 'source' populations  
2057 as possible, while maintaining reasonable numbers in each population. We do not expect our  
2058 filters for white British/non-british individuals to be perfect; furthermore, modelling modern  
2059 Eurasians as a mixture of hunter-gatherer/Steppe/farmer is overly simplistic. Therefore, we  
2060 also include ancient African and EastAsian reference populations to account for possible  
2061 'non-European' ancestry.

2062

2063 Ultimately, 318 individuals split into ten reference populations were used ([Figure S3h.2](#),  
2064 [Figure S3h.3](#), [Table S3h.1](#)): western hunter-gatherer (WHG), eastern hunter-gatherer (EHG),  
2065 Caucasus hunter-gatherer (CHG), FarmerAnatolian, FarmerEarly, FarmerMiddle,  
2066 FarmerLate, Yamnaya, African and EastAsian. Populations are characterised by  
2067 preferentially copying from individuals within the population, as well as being biologically and  
2068 historically meaningful. This dataset is henceforth called the "present aDNA dataset".

2069

2070 The farmers are split into four separate populations due to their differing behaviour as donors  
2071 (columns) in the fineSTRUCTURE analysis ([Figure S3h.1](#)). There is a cline in their degree of  
2072 WHG admixture that roughly correlates with age, while some samples also show Steppe  
2073 admixture. Given the nature of the splits, the differences between these groups should be  
2074 interpreted with caution, and for most downstream analysis these groups are merged into a  
2075 'Farmer' ancestry.

2076

#### 2077 Target/recipient panel formation

2078 We used white British individuals from the UKB as reported in Bycroft et al.<sup>4</sup>; these are  
2079 individuals who self-reported as white British and have British-like ancestry according to  
2080 PCA. We also used individuals from the UKB of a typical ancestral background selected by  
2081 country of origin ([Supplementary Note S3g](#)). We used phased haplotype data, downloaded

2082 from <https://www.ukbiobank.ac.uk>. This totalled 408,884 white British individuals, and 24,511  
2083 non-British individuals. This dataset is henceforth called the “UKB dataset”.  
2084

#### 2085 SNP selection and merging of the panels

2086 Due to computational considerations, the number of SNPs used in the painting was limited to  
2087 those in the UKB Axiom Array; these SNPs were chosen to capture genome-wide variation,  
2088 rare and coding variants, and variants relevant to specific phenotypes or regions of interest <sup>4</sup>.  
2089 The present aDNA dataset and UKB datasets were merged and filtered for these variants  
2090 using QCTOOL v2 ([https://www.well.ox.ac.uk/~gav/qctool\\_v2/](https://www.well.ox.ac.uk/~gav/qctool_v2/)), and then filtered to exclude  
2091 variants with a minor allele frequency below 1% using bcftools  
2092 (<http://samtools.github.io/bcftools/>), leaving a total of 549,323 SNPs across chromosomes 1-  
2093 22.  
2094

#### 2095 Painting process

2096 ChromoPainter <sup>1</sup> uses an approach premised on the observation that markers on the same  
2097 chromosome are inherited together unless separated by recombination; at the population  
2098 level, this results in linkage disequilibrium (LD) between close markers that reflect a shared  
2099 history of descent. The haplotype-based algorithm of ChromoPainter aims to harness this  
2100 information, detecting shared haplotypes to reconstruct phased recipient genomes as chunks  
2101 ‘copied’ from donors.

2102

2103 Considering the genealogy of a single locus, we can identify one or more closest relatives to  
2104 that locus, henceforth called ‘nearest neighbours’; if viewed as a genealogy, these are the  
2105 other leaves of the tree underneath the first coalescence. Therefore at each locus of each  
2106 haplotype, there exists one or more nearest neighbours. ChromoPainter aims to identify  
2107 these using an approximate method based on that introduced by Li and Stephens <sup>5</sup>: the  
2108 Hidden Markov Model (HMM), which explicitly reconstructs the haplotype of a recipient/target  
2109 individual as a series of chunks of genetic material donated by the other donor/reference  
2110 individuals, using information on the types of the recipient and potential donor at each SNP.  
2111 This approach is probabilistic, calculating the expectations of which haplotype acts as donor  
2112 to a recipient as a function of position over an infinite number of paintings <sup>1</sup>. Although  
2113 ChromoPainter was originally intended to use this information, in the form of a ‘co-ancestry  
2114 matrix’, to ascertain fine-scale population structure and clustering (in the fineSTRUCTURE  
2115 software package), the software can be used with pre-defined donor and recipient  
2116 populations.

2117

2118 If the donor panel is formed of ancient individuals and the recipient individual is modern, the  
2119 nearest neighbour should reflect some history of that locus. The ability of chromosome  
2120 painting to accurately infer ancestry is expected to depend on the diversity between donor  
2121 populations: more genetically similar populations and the algorithm will find it difficult to  
2122 correctly identify the nearest neighbour(s). There is also the issue of 'masking' whereby  
2123 haplotypes from older populations would have travelled through more recent populations  
2124 before arriving in the modern population; this causes a genome-wide bias towards the more  
2125 recent ancient populations, the effects of which are discussed below. Here, we use nearest  
2126 neighbour as a proxy for local ancestry - i.e. which population that haplotype came from  
2127 (which may not be a single unique population from our panel).

2128

2129 Chromosome painting cannot include the target of painting. Therefore, painting was done  
2130 (following the pipeline of Margaryan et al. <sup>2</sup> based on GLOBETROTTER <sup>3</sup> by leaving out one  
2131 individual at random (chosen independently for each chromosome) from each other donor  
2132 population for all donor individuals. Target individuals from the UK Biobank were painted by  
2133 similarly removing one individual at random from all donor populations. This ensures that  
2134 individuals from the reference and UK Biobank are exchangeable.

2135

2136 Once we had a well-chosen set of ancient populations from the present aDNA panel, each  
2137 individual was repainted twice leaving out themselves as a possible donor: first to learn the  
2138 painting parameters  $N_e$  and  $\mu$ , and then to learn a genome-wide individual-specific donor-  
2139 prior. For each of the reference populations, the average amount of genome received from  
2140 each donor individual was learnt. We then painted the modern individuals in the UKB panel  
2141 using the reference populations and the learnt parameters and priors.

2142

2143 The probability that each recipient copied each donor population at every SNP was recorded.  
2144 The genome-wide information for each recipient was also stored, in the form of (i)  
2145 chunkcounts, the number of chunks copied from each donor population and (ii) chunk  
2146 lengths, the sum of the lengths of the chunks copied from each population, weighted by their  
2147 copying probability. Admixture proportions were then estimated using Non-Negative Least  
2148 Squares (NNLS).

2149

2150 Painting at biobank scale

2151 We used custom scripts to speed up this process (specifically reading from large phase  
2152 files), to enable running for large numbers of recipients in parallel across multiple nodes, and

2153 to store the local copying probabilities in a memory-efficient format in real time (all scripts  
2154 available at [https://github.com/will-camb/Nero/tree/master/scripts/cp\\_panel\\_scripts](https://github.com/will-camb/Nero/tree/master/scripts/cp_panel_scripts)). The  
2155 total CPU time for painting the UKB panel was approximately 550,000 CPU hours.

## 2156 Results

### 2157 Ancestry-PCs relationship

2158 PCA is a dimensionality reduction technique that can be applied to genetic data, the results  
2159 of which are useful as a means to visualise variation between individuals/groups, and are  
2160 expected to reflect historical events that cause differences in ancestry due to drift, admixture  
2161 etc. It is well established that PC1 vs PC2 vs PC3 generally separate African, European and  
2162 East Asian populations. We ran multivariate linear regressions using ancestry components to  
2163 predict UKB PCs <sup>4</sup>. Previous work has shown that the main UKB PCs that reflect British  
2164 population structure are PCs 5 and 9, describing variation between English, Scottish and  
2165 Welsh ancestry, and PCs 11 and 14 which further separate structure within Wales and  
2166 England <sup>6</sup>.

2167

2168 We found significant correlations between ancestry components and PC4 (R-  
2169 squared=0.553) and PC5 (R-squared=0.376), as well as PC1 (R-squared=0.165) and PC7  
2170 (R-squared=0.130). We found that the high PC4 correlation with ancestry component was  
2171 largely driven by a Steppe (Yamnaya/EHG) vs Farmer divide, both within Britain and  
2172 internationally: high PC4 values are associated with high Steppe/low Farmer ancestry, while  
2173 low PC4 values are associated with low Steppe/high Farmer ancestry.

2174

### 2175 Ancestry-geographic variation

2176 Within the British Isles, all individuals were painted with similar proportions from each  
2177 reference population, as expected when measuring coalescence tracts rather than direct  
2178 admixture tracts and after a long time since admixture events; but, the differences in copying  
2179 proportions showed significant geographic heterogeneity. We ran multivariate linear  
2180 regressions, using longitude and latitude of place of birth ("Place of birth in UK – east co-  
2181 ordinate" and "Place of birth in UK – north co-ordinate") to predict NNLS ancestry fractions.  
2182 We found significant correlations for Yamnaya ancestry (R-squared=0.081), Farmer ancestry  
2183 (R-squared=0.066), CHG ancestry (R-squared=0.015), WHG ancestry (R-squared=0.007),  
2184 African ancestry (R-squared=0.011) and EHG ancestry (R-squared=0.01, longitude only). To  
2185 visualise this, we assigned individuals to a county based on their UKB place of birth data,

2186 and plotted the average admixture proportion per county for each ancestry, binned in ten  
2187 equal interval quantiles using ArcGIS Online ([www.arcgis.com](http://www.arcgis.com); Figure 5, main text).

2188

2189 We found that Neolithic farmer ancestry was highest in southern and eastern England and  
2190 lower in populations in Scotland, Wales and Cornwall. We found the opposite pattern in  
2191 Yamnaya ancestry, representing the Steppe component, which has previously been shown  
2192 to be higher in Scotland but not Wales <sup>7</sup>; we found this was highest in the Outer Hebrides.  
2193 This Farmer/Yamnaya dichotomy broadly reflects an Anglo-Saxon/'Celtic' distribution. We  
2194 are unable to date when these subtle population structures arose, but note that the Neolithic  
2195 Anatolian-related farmer ancestry is already present in the British and Roman Iron Age but  
2196 lower in Saxon individuals (Extended Data Figure 3, main text), meaning these patterns  
2197 cannot be explained just by Saxon-related ancestry. They are likely a result of pre-Roman  
2198 migration between 1000 and 875 BC which resulted in a slight increase in Early Farmer  
2199 ancestry in England and Wales but not Scotland <sup>8</sup>, although we note our results show a  
2200 marked difference between Wales/Cornwall and England too. We also found higher levels of  
2201 WHG-related ancestry in central and Northern England.

2202

2203 Looking at a continent-wide level, the hunter-gatherer ancestries display distinct structure in  
2204 modern populations (Figure 5, main text). WHG-related ancestry is highest in present-day  
2205 individuals from the Baltic States, Belarus, Poland and Russia; EHG-related ancestry is  
2206 highest in Mongolia, Finland, Estonia and Central Asia; and CHG-related ancestry is  
2207 maximised in countries east of the Caucasus, in Pakistan, India, Afghanistan and Iran, in  
2208 accordance with previous results <sup>9</sup>. The CHG-related ancestry likely picks up both Caucasus  
2209 hunter-gatherer and Iranian Neolithic signals, explaining the relatively high levels in south  
2210 Asia <sup>10</sup>. Consistent with expectations <sup>11,12</sup>, Neolithic Anatolian-related farmer ancestry is  
2211 concentrated around the Mediterranean basin, with high levels in southern Europe, the Near  
2212 East and North Africa, including the Horn of Africa but less in Northern Europe. A contrasting  
2213 pattern was observed in Yamnaya-related ancestry decreasing from high levels in northern  
2214 Europe, peaking in Ireland, Iceland, Norway and Sweden, but decreasing further south  
2215 where Neolithic farmer ancestry still dominates. There is also evidence for its spread into  
2216 southern Asia. These results provide a new level of detail on the modern distribution of  
2217 ancient ancestries.

2218

2219 To better understand how countries varied in their ancestry proportions, we ran Scikit-learn's  
2220 PCA <sup>13</sup> on the average admixture proportions per country. We then ran a hierarchical  
2221 clustering algorithm on the first 4 PCs (explained variance=0.244), and built a dendrogram

2222 (Figure S3h.4)<sup>14</sup>. For further analysis, we excluded countries in clusters dominated by  
2223 African or East Asian ancestry, leaving 80 countries.

2224

2225 We used Sklearn's StandardScaler utility class to standardise each feature (zero mean and  
2226 unit variance), then ran a PCA using the standardised average admixture proportions for  
2227 each of the 80 remaining countries (<https://github.com/erdogant/distfit>), and plotted a biplot  
2228 (PC1 vs PC2 with loadings for each feature plotted), which shows the correlations between  
2229 ancestries (Figure S3h.5). This gives a more visual representation of how countries group by  
2230 ancestry, and broadly reflects actual geography.

## 2231 Discussion

2232 The large ancient DNA panel established here combined with the UKB allows us to trace for  
2233 the first time the fine-scale distribution of Mesolithic/Neolithic/Bronze Age ancestry  
2234 components in modern British individuals, using DNA directly from ancient individuals. It also  
2235 demonstrates the ancestry differences within an 'ethnic group' (white British) traditionally  
2236 regarded as being relatively homogenous, highlighting the need for care over ancestry  
2237 considerations when using resources like the UK Biobank.

2238

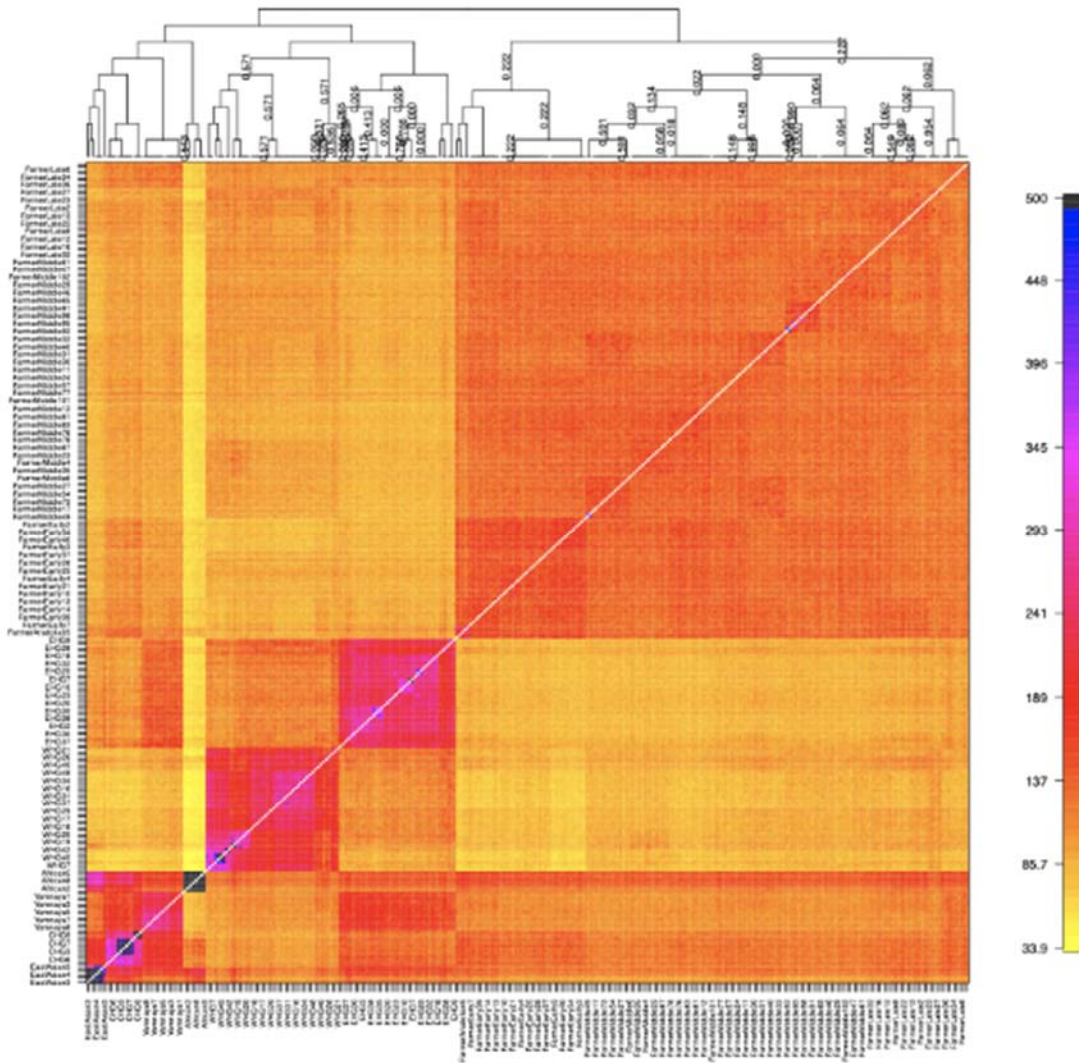

2240  
 2241 **Figure S3h.1. Co-ancestry heatmap of selected ancient samples.** The output of  
 2242 fineSTRUCTURE analysis of the ancient reference panel, showing copying proportions  
 2243 between ancient populations (columns=donors, rows=recipients). There is a cline in Hunter-  
 2244 Gatherer admixture in the Farmers, roughly correlating with age. For most downstream  
 2245 analyses, the Farmer populations were merged.



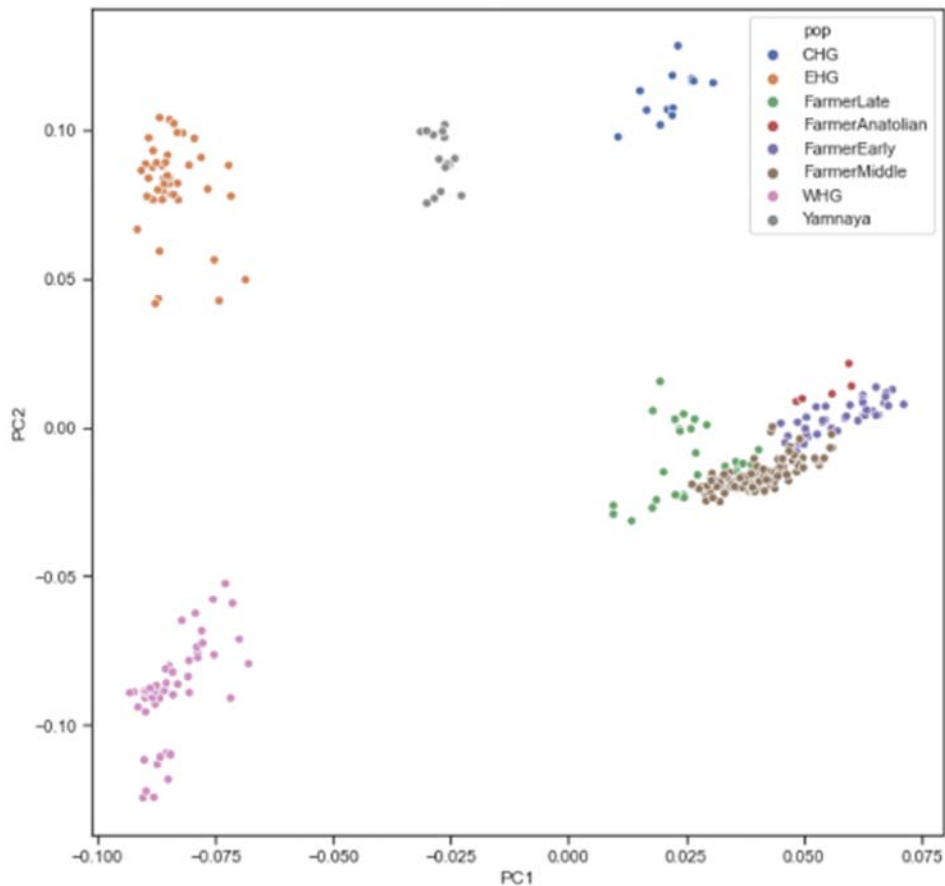

2246  
 2247  
 2248  
 2249  
 2250  
 2251  
 2252  
 2253  
 2254  
 2255

**Figure S3h.2. PCA of ancient reference samples, coloured by assigned population.** PC1 vs PC2 of a PCA of the ancient western Eurasian samples (excluding African and EastAsian), coloured by their assigned population used in the painting. As can be seen, populations are fairly distinct, with intermediate admixed individuals having been excluded. Some Farmers are admixed with Steppe and Hunter-Gatherer populations to differing degrees, but particularly among later individuals.

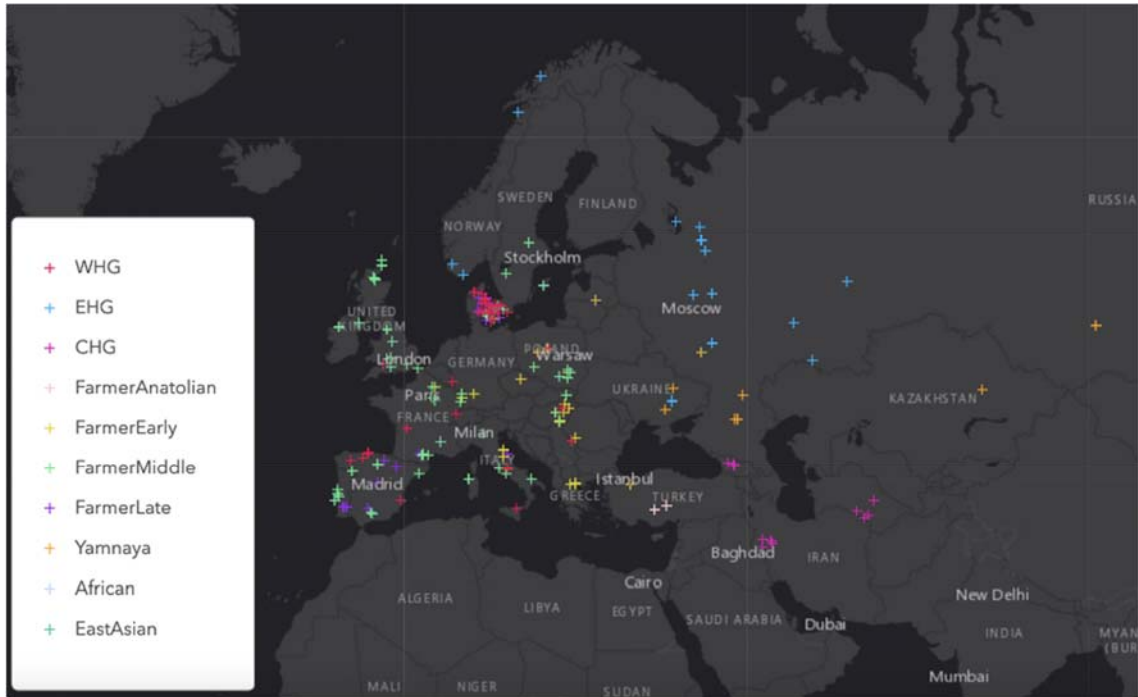

2256

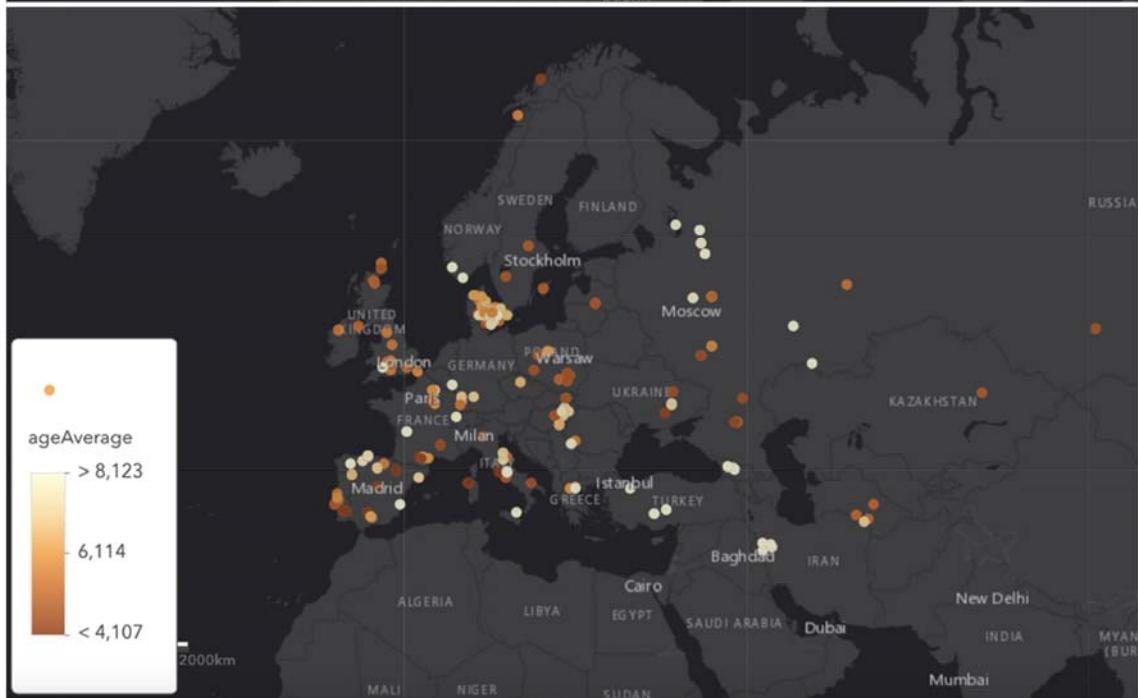

2257

2258

2259

2260

Figure S3h.3. Maps of ancient sample locations coloured by assigned reference population (above) and age (below). Not showing African and East Asian samples.

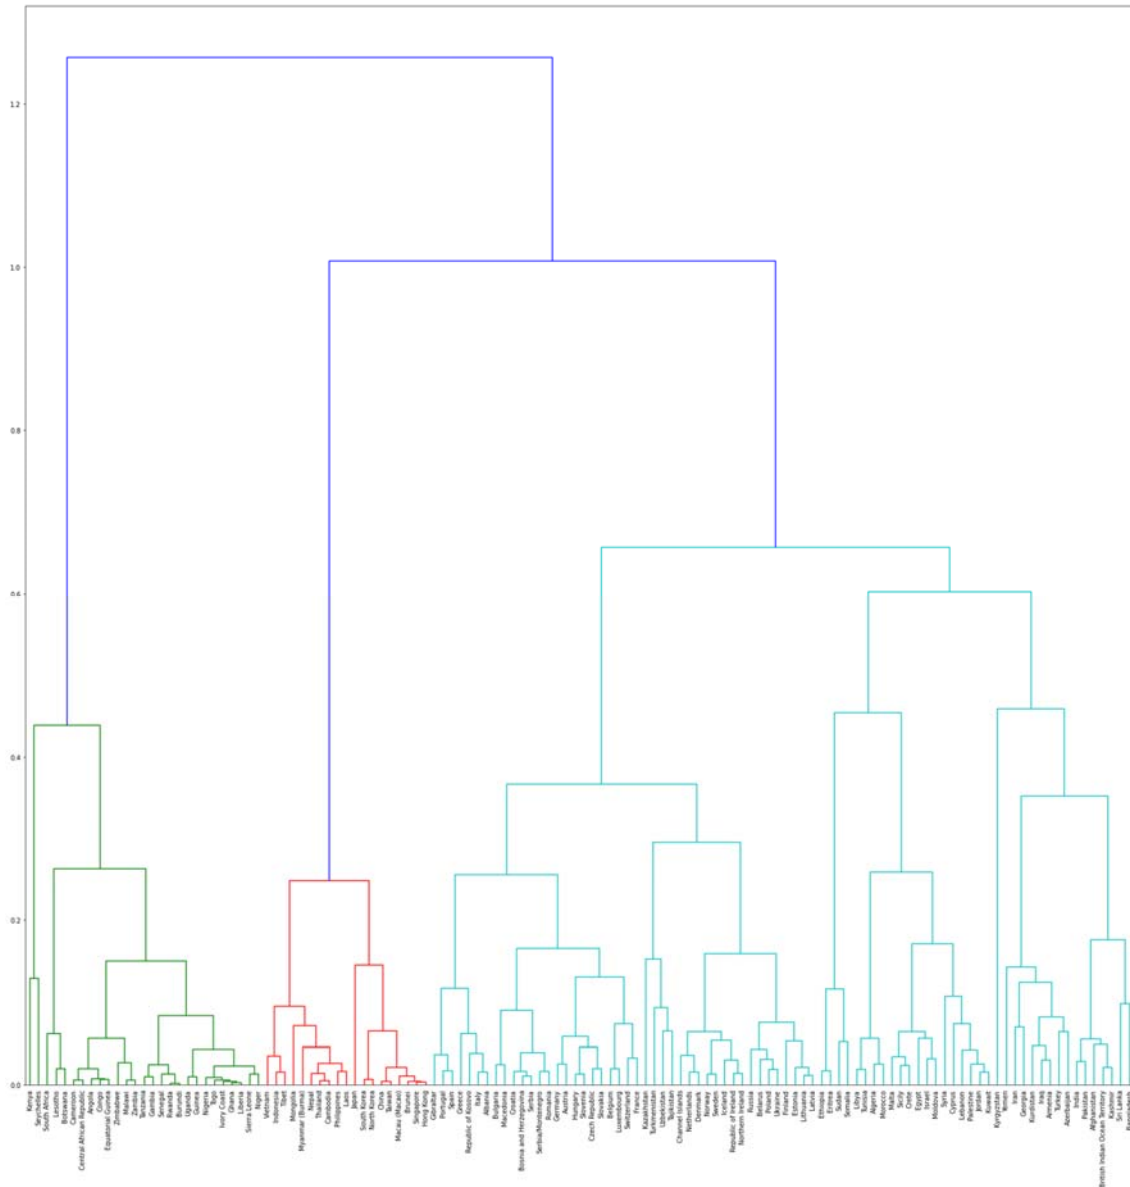

2261  
 2262  
 2263  
 2264  
 2265

**Figure S3h.4. Dendrogram based on hierarchical clustering of first 4 PCs of average admixture proportions per country.** For further analysis, countries in clusters dominated by African (green) or East Asian (red) ancestry were dropped.

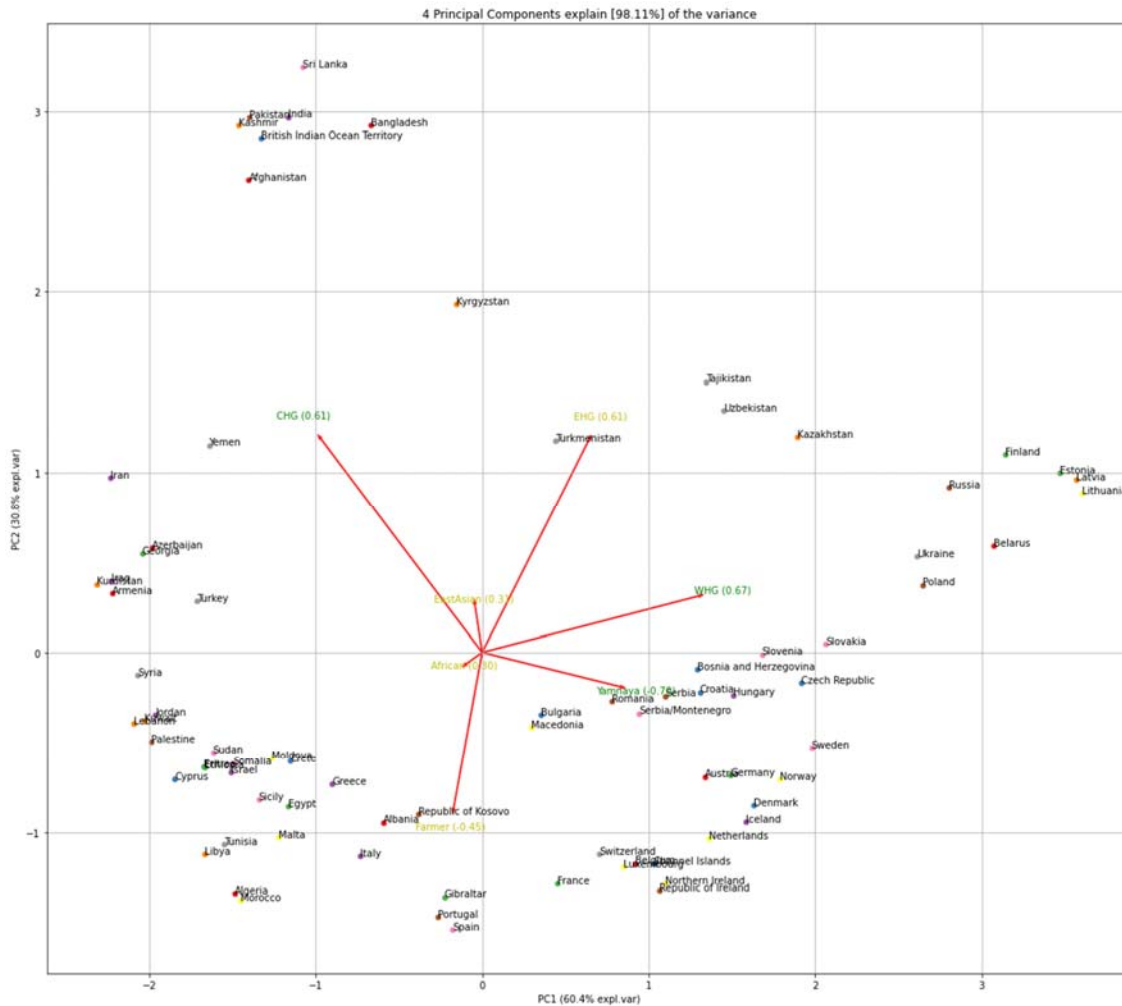

2266  
2267  
2268  
2269  
2270  
2271

Figure S3h.5. PCA biplot of standardised average NLS admixture proportion per country, based on 80 countries in Europe, West/Southern Asia, the Middle East and North Africa.

| referenceP<br>population | sampleId | country         | groupLabel                | lati<br>tude   | long<br>itud<br>e | ageAv<br>erage | coverage              | s<br>e<br>x | clusterIBDFine                    |
|--------------------------|----------|-----------------|---------------------------|----------------|-------------------|----------------|-----------------------|-------------|-----------------------------------|
| African                  | mfo01    | South<br>Africa | SouthAfrica_IronAge       | -<br>28.<br>73 | 30.8<br>1         | 378.0          | 7.061854822<br>000000 | X<br>X      | 6.1_SouthAfrica_400B<br>P         |
| African                  | bab01    | South<br>Africa | SouthAfrica_Neolithi<br>c | -<br>29.<br>54 | 31.2<br>2         | 2040.5         | 1.29865429            | X<br>Y      | 6.2_SouthAfrica_2000<br>BP_1000BP |
| African                  | ela01    | South<br>Africa | SouthAfrica_IronAge       | -<br>28.<br>92 | 29.1<br>3         | 493.0          | 13.46552376           | X<br>X      | 6.1_SouthAfrica_400B<br>P         |
| African                  | 110871   | Camero<br>on    | Cameroon_Neolithic        | 5.8<br>6       | 10.0<br>8         | 7885.0         | 15.21262736           | X<br>Y      | 6.3_Cameroon_8000B<br>P_3000BP    |
| African                  | 110873   | Camero<br>on    | Cameroon_Neolithic        | 5.8<br>6       | 10.0<br>8         | 3065.0         | 3.276739876           | X<br>Y      | 6.3_Cameroon_8000B<br>P_3000BP    |

|                |         |              |                                |         |       |         |                    |        |                                |
|----------------|---------|--------------|--------------------------------|---------|-------|---------|--------------------|--------|--------------------------------|
| <b>African</b> | I9133   | South Africa | SouthAfrica_Neolithic          | - 31.98 | 18.52 | 1970.0  | 2.0755013510000000 | X<br>Y | 6.2_SouthAfrica_2000BP_1000BP  |
| <b>African</b> | baa01   | South Africa | SouthAfrica_Neolithic          | - 29.54 | 31.22 | 1908.5  | 13.50021278        | X<br>Y | 6.2_SouthAfrica_2000BP_1000BP  |
| <b>African</b> | new01   | South Africa | SouthAfrica_IronAge            | - 27.76 | 29.92 | 417.5   | 10.89613659        | X<br>X | 6.1_SouthAfrica_400BP          |
| <b>CHG</b>     | WC1     | Iran         | Iran_Neolithic                 | 34.61   | 47.11 | 9218.5  | 10.4300754         | X<br>Y | 2.1_Iran_10000BP_8500BP        |
| <b>CHG</b>     | AH4     | Iran         | Iran_Neolithic                 | 34.19   | 48.37 | 9929.5  | 0.8674508960000000 | X<br>X | 2.1_Iran_10000BP_8500BP        |
| <b>CHG</b>     | AH2     | Iran         | Iran_Neolithic                 | 34.19   | 48.37 | 9930.5  | 0.6492785520000000 | X<br>Y | 2.1_Iran_10000BP_8500BP        |
| <b>CHG</b>     | AH1     | Iran         | Iran_Neolithic                 | 34.19   | 48.37 | 9900.0  | 1.161365185        | X<br>X | 2.1_Iran_10000BP_8500BP        |
| <b>CHG</b>     | DA380   | Turkmenistan | Turkmenistan_Neolithic_Namazga | 37.6    | 59.33 | 5180.5  | 0.495449798        | X<br>X | 2.1_Turkmenistan_7000BP_5000BP |
| <b>CHG</b>     | DA381   | Turkmenistan | Turkmenistan_Neolithic_Namazga | 37.19   | 61.03 | 5181.0  | 0.83822953         | X<br>Y | 2.1_Turkmenistan_7000BP_5000BP |
| <b>CHG</b>     | NEO816  | Iran         | Iran_Neolithic                 | 33.76   | 47.1  | 8700.0  | 0.940243388        | X<br>Y | 2.1_Iran_10000BP_8500BP        |
| <b>CHG</b>     | NEO281  | Georgia      | Georgia_Mesolithic             | 42.22   | 43.32 | 9724.0  | 3.607878115        | X<br>Y | 2.1_Caucasus_13000BP_10000BP   |
| <b>CHG</b>     | KK1     | Georgia      | Georgia_Mesolithic             | 42.28   | 43.28 | 9720.0  | 11.83484526        | X<br>Y | 2.1_Caucasus_13000BP_10000BP   |
| <b>CHG</b>     | SATP    | Georgia      | Georgia_Mesolithic             | 42.38   | 42.59 | 13255.0 | 1.18417508         | X<br>Y | 2.1_Caucasus_13000BP_10000BP   |
| <b>CHG</b>     | GD13a   | Iran         | Iran_Neolithic                 | 34.45   | 48.12 | 9846.0  | 1.41728065         | X<br>X | 2.1_Iran_10000BP_8500BP        |
| <b>CHG</b>     | DA383   | Turkmenistan | Turkmenistan_Neolithic_Namazga | 38.72   | 61.69 | 5150.0  | 0.7751095790000000 | X<br>X | 2.1_Turkmenistan_7000BP_5000BP |
| <b>CHG</b>     | NEO310  | Turkmenistan | Turkmenistan_Neolithic         | 36.85   | 60.42 | 7150.0  | 1.278435989        | X<br>Y | 2.1_Turkmenistan_7000BP_5000BP |
| <b>EHG</b>     | Karelia | Russia       | Russia_Mesolithic              | 61.65   | 35.65 | 8279.5  | 1.692885466        | X<br>Y | 4.1_RussiaNW_11000BP_8000BP    |
| <b>EHG</b>     | NEO166  | Russia       | Russia_Neolithic               | 53.0    | 40.4  | 5668.0  | 2.1533629430000000 | X<br>Y | 4.1_DonRiver_5800BP_5300BP     |
| <b>EHG</b>     | NEO167  | Russia       | Russia_Neolithic               | 53.0    | 40.4  | 5657.0  | 0.588921338        | X<br>X | 4.1_DonRiver_5800BP_5300BP     |
| <b>EHG</b>     | NEO170  | Russia       | Russia_Neolithic               | 53.0    | 40.4  | 5562.0  | 0.4188968770000000 | X<br>X | 4.1_DonRiver_5800BP_5300BP     |
| <b>EHG</b>     | NEO171  | Russia       | Russia_Neolithic               | 53.0    | 40.4  | 5835.0  | 0.818232704        | X<br>X | 4.1_DonRiver_5800BP_5300BP     |
| <b>EHG</b>     | VK531   | Norway       | Norway_Neolithic               | 69.47   | 18    | 4350.0  | 1.4595637520000000 | X<br>Y | 4.1_Norway_9300BP_4300BP       |
| <b>EHG</b>     | NEO173  | Russia       | Russia_Neolithic_Sredny        | 52.28   | 38.96 | 6345.0  | 0.689663925        | X<br>X | 4.1_RussiaNW_7000BP_5000BP     |

|     |            |         |                          |       |       |         |                     |        |                             |
|-----|------------|---------|--------------------------|-------|-------|---------|---------------------|--------|-----------------------------|
| EHG | NEO100     | Russia  | Russia_Mesolithic        | 51.57 | 53.68 | 9929.0  | 0.10793872200000000 | X<br>Y | 4.1_RussiaNW_11000BP_8000BP |
| EHG | NEO88      | Russia  | Russia_Mesolithic        | 56.67 | 38.02 | 7871.0  | 2.6217337880000000  | X<br>Y | 4.1_RussiaNW_11000BP_8000BP |
| EHG | H22        | Norway  | Norway_Mesolithic        | 58.83 | 6.33  | 9363.5  | 0.719978067         | X<br>X | 4.1_Norway_9300BP_4300BP    |
| EHG | stg001     | Norway  | Norway_Neolithic         | 67.76 | 14.85 | 5857.0  | 1.291071015         | X<br>Y | 4.1_Norway_9300BP_4300BP    |
| EHG | NEO87      | Russia  | Russia_Mesolithic        | 56.67 | 38.02 | 8259.0  | 0.183898205         | X<br>X | 4.1_RussiaNW_11000BP_8000BP |
| EHG | NEO17      | Norway  | Norway_Mesolithic        | 58.06 | 7.74  | 9146.0  | 1.0991194990000000  | X<br>Y | 4.1_Norway_9300BP_4300BP    |
| EHG | Ukraine_N1 | Ukraine | Ukraine_Neolithic        | 48.13 | 35.08 | 7250.0  | 0.167926522         | X<br>Y | 4.1_Ukraine_10000BP_4000BP  |
| EHG | Latvia_MN2 | Latvia  | Latvia_Neolithic_CC<br>C | 56.28 | 25.13 | 5965.0  | 1.147611647         | X<br>X | 4.1_RussiaNW_7000BP_5000BP  |
| EHG | NEO160     | Russia  | Russia_Neolithic         | 53.0  | 40.4  | 5269.0  | 1.326576858         | X<br>X | 4.1_DonRiver_5800BP_5300BP  |
| EHG | NEO178     | Russia  | Russia_Neolithic         | 56.78 | 40.45 | 5322.0  | 0.32433320600000000 | X<br>Y | 4.1_RussiaNW_7000BP_5000BP  |
| EHG | NEO163     | Russia  | Russia_Neolithic         | 53.0  | 40.4  | 5603.0  | 0.226384639         | X<br>Y | 4.1_DonRiver_5800BP_5300BP  |
| EHG | NEO180     | Russia  | Russia_Neolithic         | 56.78 | 40.45 | 5947.0  | 0.38518779200000000 | X<br>Y | 4.1_RussiaNW_7000BP_5000BP  |
| EHG | NEO687     | Russia  | Russia_Neolithic         | 57.58 | 58.2  | 5446.0  | 0.44089811100000000 | X<br>Y | 4.1_RussiaNW_7000BP_5000BP  |
| EHG | NEO560     | Russia  | Russia_Neolithic         | 60.41 | 38.93 | 7919.0  | 1.548541653         | X<br>Y | 4.1_RussiaNW_11000BP_8000BP |
| EHG | NEO559     | Russia  | Russia_Neolithic         | 60.41 | 38.93 | 8268.0  | 1.228507174         | X<br>Y | 4.1_RussiaNW_11000BP_8000BP |
| EHG | NEO557     | Russia  | Russia_Neolithic         | 60.41 | 38.93 | 7917.0  | 0.77765409100000000 | X<br>Y | 4.1_RussiaNW_11000BP_8000BP |
| EHG | NEO556     | Russia  | Russia_Neolithic         | 60.41 | 38.93 | 7036.0  | 1.122201651         | X<br>X | 4.1_RussiaNW_7000BP_5000BP  |
| EHG | NEO555     | Russia  | Russia_Neolithic         | 60.41 | 38.93 | 8280.0  | 2.097005144         | X<br>Y | 4.1_RussiaNW_11000BP_8000BP |
| EHG | NEO539     | Russia  | Russia_Mesolithic        | 59.7  | 39.5  | 10060.0 | 0.291758629         | X<br>X | 4.1_RussiaNW_11000BP_8000BP |
| EHG | NEO179     | Russia  | Russia_Neolithic         | 56.78 | 40.45 | 5467.0  | 0.63935954700000000 | X<br>X | 4.1_RussiaNW_7000BP_5000BP  |
| EHG | NEO536     | Russia  | Russia_Mesolithic        | 59.7  | 39.5  | 9541.0  | 0.190177354         | X<br>Y | 4.1_RussiaNW_11000BP_8000BP |
| EHG | NEO501     | Ukraine | Ukraine_Mesolithic       | 48.2  | 35.22 | 10623.0 | 0.125455369         | X<br>Y | 4.1_Ukraine_10000BP_4000BP  |
| EHG | NEO202     | Russia  | Russia_Mesolithic        | 61.27 | 38.91 | 10884.0 | 2.217735963         | X<br>Y | 4.1_RussiaNW_11000BP_8000BP |
| EHG | NEO197     | Russia  | Russia_Neolithic         | 56.78 | 40.45 | 5245.0  | 0.610890023         | X<br>Y | 4.1_RussiaNW_7000BP_5000BP  |

|                        |               |          |                             |       |        |         |                     |        |                                   |
|------------------------|---------------|----------|-----------------------------|-------|--------|---------|---------------------|--------|-----------------------------------|
| <b>EHG</b>             | NEO195        | Russia   | Russia_Neolithic            | 56.78 | 40.45  | 5749.0  | 0.59759596          | X<br>Y | 4.1_RussiaNW_7000BP_5000BP        |
| <b>EHG</b>             | NEO174        | Russia   | Russia_Neolithic_Sredny     | 52.28 | 38.96  | 5306.0  | 1.1520597560000000  | X<br>X | 4.1_DonRiver_5800BP_5300BP        |
| <b>EHG</b>             | NEO193        | Russia   | Russia_Neolithic            | 56.78 | 40.45  | 5453.0  | 0.232823778         | X<br>Y | 4.1_RussiaNW_7000BP_5000BP        |
| <b>EHG</b>             | NEO184        | Russia   | Russia_Neolithic            | 56.78 | 40.44  | 5458.0  | 0.695336472         | X<br>X | 4.1_RussiaNW_7000BP_5000BP        |
| <b>EHG</b>             | NEO185        | Russia   | Russia_Neolithic            | 56.78 | 40.45  | 7034.0  | 1.2132381190000000  | X<br>Y | 4.1_RussiaNW_7000BP_5000BP        |
| <b>EHG</b>             | NEO194        | Russia   | Russia_Neolithic            | 56.78 | 40.45  | 5575.0  | 1.626304895         | X<br>Y | 4.1_RussiaNW_7000BP_5000BP        |
| <b>EHG</b>             | NEO187        | Russia   | Russia_Neolithic            | 56.78 | 40.45  | 4940.0  | 0.16188839          | X<br>X | 4.1_RussiaNW_7000BP_5000BP        |
| <b>EHG</b>             | Sidelkino     | Russia   | Russia_Mesolithic           | 54.53 | 51.11  | 11258.5 | 2.9967359070000000  | X<br>X | 4.1_RussiaNW_11000BP_8000BP       |
| <b>EHG</b>             | NEO186        | Russia   | Russia_Neolithic            | 56.78 | 40.45  | 6922.0  | 0.36842406300000000 | X<br>Y | 4.1_RussiaNW_7000BP_5000BP        |
| <b>EHG</b>             | NEO192        | Russia   | Russia_Neolithic            | 56.78 | 40.45  | 6841.0  | 0.269995424         | X<br>X | 4.1_RussiaNW_7000BP_5000BP        |
| <b>EHG</b>             | NEO189        | Russia   | Russia_Neolithic            | 56.78 | 40.45  | 5648.0  | 0.614470507         | X<br>Y | 4.1_RussiaNW_7000BP_5000BP        |
| <b>EastAsian</b>       | IK002         | Japan    | Japan_Jomon                 | 34.65 | 137.14 | 2569.0  | 1.89109494          | X<br>X | 3.1_Japan_3700BP_2600BP           |
| <b>EastAsian</b>       | DA45          | Mongolia | Mongolia_IronAge_XiongNu    | 42.53 | 105.18 | 2095.0  | 9.039659899         | X<br>Y | 3.1_SEAsia_4000BP_150BP           |
| <b>EastAsian</b>       | DA43          | Mongolia | Mongolia_IronAge_XiongNu    | 42.53 | 105.18 | 2095.0  | 1.677926438         | X<br>Y | 3.1_SEAsia_4000BP_150BP           |
| <b>EastAsian</b>       | DA39          | Mongolia | Mongolia_IronAge_XiongNu    | 48.02 | 101.35 | 1948.0  | 2.087185526         | X<br>Y | 3.1_SteppeCE_2000BP_700BP         |
| <b>EastAsian</b>       | DA38          | Mongolia | Mongolia_IronAge_XiongNu    | 49.27 | 101.72 | 2124.5  | 2.85446773          | X<br>X | 3.1_SteppeC_TianShan_2700BP_800BP |
| <b>EastAsian</b>       | Funadomari_23 | Japan    | Japan_Jomon                 | 45.38 | 141.04 | 3755.0  | 39.44124624         | X<br>X | 3.1_Japan_3700BP_2600BP           |
| <b>EastAsian</b>       | Funadomari_5  | Japan    | Japan_Jomon                 | 45.38 | 141.04 | 3755.0  | 3.8214367780000000  | X<br>Y | 3.1_Japan_3700BP_2600BP           |
| <b>FarmerAnatolian</b> | Bon001        | Turkey   | Anatolia_Neolithic_Aceramic | 37.75 | 32.86  | 10032.0 | 0.16310050200000000 | X<br>Y | 2.3_Anatolia_10000BP_8000BP       |
| <b>FarmerAnatolian</b> | Bon002        | Turkey   | Anatolia_Neolithic_Aceramic | 37.75 | 32.86  | 10078.0 | 6.692061812         | X<br>X | 2.3_Anatolia_10000BP_8000BP       |
| <b>FarmerAnatolian</b> | Bon004        | Turkey   | Anatolia_Neolithic_Aceramic | 37.75 | 32.86  | 10076.0 | 0.242113723         | X<br>Y | 2.3_Anatolia_10000BP_8000BP       |
| <b>FarmerAnatolian</b> | Tep002        | Turkey   | Anatolia_Neolithic          | 38.17 | 34.49  | 8585.0  | 0.7072354540000000  | X<br>X | 2.3_Anatolia_10000BP_8000BP       |
| <b>FarmerAnatolian</b> | Tep004        | Turkey   | Anatolia_Neolithic          | 38.17 | 34.49  | 8295.0  | 0.467990841         | X<br>X | 2.3_Anatolia_10000BP_8000BP       |
| <b>FarmerEarly</b>     | R3            | Italy    | Italy_Neolithic             | 41.96 | 13.54  | 7729.5  | 4.059641042         | X<br>X | 2.3_EuropeS_8000BP_6000BP         |

|             |          |               |                               |       |       |        |                     |        |                            |
|-------------|----------|---------------|-------------------------------|-------|-------|--------|---------------------|--------|----------------------------|
| FarmerEarly | R17      | Italy         | Italy_Neolithic               | 43.72 | 13.03 | 7223.5 | 0.56582164          | X<br>Y | 2.3_EuropeS_8000BP_6000BP  |
| FarmerEarly | R19      | Italy         | Italy_Neolithic               | 43.72 | 13.03 | 7233.0 | 0.52086802          | X<br>Y | 2.3_EuropeS_8000BP_6000BP  |
| FarmerEarly | R18      | Italy         | Italy_Neolithic               | 43.72 | 13.03 | 7298.5 | 0.6271842           | X<br>X | 2.3_EuropeS_8000BP_6000BP  |
| FarmerEarly | R16      | Italy         | Italy_Neolithic               | 43.72 | 13.03 | 7207.5 | 0.565514455         | X<br>X | 2.3_EuropeS_8000BP_6000BP  |
| FarmerEarly | R10      | Italy         | Italy_Neolithic               | 41.96 | 13.54 | 7629.0 | 1.3218194860000000  | X<br>X | 2.3_EuropeS_8000BP_6000BP  |
| FarmerEarly | R2       | Italy         | Italy_Neolithic               | 41.96 | 13.54 | 7984.0 | 3.7040638540000000  | X<br>X | 2.3_EuropeS_8000BP_6000BP  |
| FarmerEarly | R9       | Italy         | Italy_Neolithic               | 41.96 | 13.54 | 7496.0 | 4.04251971          | X<br>Y | 2.3_EuropeS_8000BP_6000BP  |
| FarmerEarly | MDV248   | France        | France_Neolithic_LBK          | 49.42 | 4.01  | 7015.5 | 0.12114648900000000 | X<br>Y | 2.3_Europe_8500BP_5500BP   |
| FarmerEarly | ROS45    | France        | France_Neolithic_Grossgartach | 48.5  | 7.47  | 6642.5 | 0.26929279900000000 | X<br>Y | 2.3_Europe_8500BP_5500BP   |
| FarmerEarly | ROS78    | France        | France_Neolithic_Grossgartach | 48.5  | 7.47  | 6550.0 | 0.435416491         | X<br>Y | 2.3_Europe_8500BP_5500BP   |
| FarmerEarly | Sch72-15 | France        | France_Neolithic_LBK          | 48.76 | 7.6   | 7036.5 | 0.235222248         | X<br>Y | 2.3_Europe_8500BP_5500BP   |
| FarmerEarly | Schw432  | France        | France_Neolithic_LBK          | 48.76 | 7.6   | 7100.0 | 0.148141996         | X<br>X | 2.3_Europe_8500BP_5500BP   |
| FarmerEarly | NEO137   | Hungary       | Hungary_Neolithic_Koros       | 46.42 | 20.33 | 7591.0 | 0.19840285800000000 | X<br>X | 2.3_Europe_8500BP_5500BP   |
| FarmerEarly | NEO140   | Hungary       | Hungary_Neolithic_Tisza       | 46.37 | 20.42 | 6718.0 | 0.14514291200000000 | X<br>Y | 2.3_Europe_8500BP_5500BP   |
| FarmerEarly | NEO145   | Hungary       | Hungary_Neolithic_Tisza       | 46.37 | 20.42 | 6744.0 | 0.21895615100000000 | X<br>X | 2.3_Europe_8500BP_5500BP   |
| FarmerEarly | NEO147   | Hungary       | Hungary_Neolithic_Tisza       | 46.37 | 20.42 | 6724.0 | 0.28457105900000000 | X<br>X | 2.3_Europe_8500BP_5500BP   |
| FarmerEarly | NEO695   | Italy         | Italy_Neolithic               | 43.08 | 13.06 | 7299.0 | 0.43141110300000000 | X<br>X | 2.3_EuropeS_8000BP_6000BP  |
| FarmerEarly | NEO674   | Romania       | Romania_Neolithic             | 44.9  | 22.43 | 5570.0 | 0.237000547         | X<br>Y | 2.3_Europe_8500BP_5500BP   |
| FarmerEarly | R8       | Italy         | Italy_Neolithic               | 41.96 | 13.54 | 7723.5 | 0.53180897          | X<br>X | 2.3_EuropeS_8000BP_6000BP  |
| FarmerEarly | kol6     | CzechRepublic | Czech_Neolithic_Megalithic    | 50.03 | 15.2  | 6690.0 | 1.543500893         | X<br>X | 2.3_EuropeCE_7000BP_5500BP |
| FarmerEarly | NEO655   | Serbia        | Serbia_Mesolithic             | 44.54 | 22.04 | 8668.0 | 0.22549267400000000 | X<br>X | 2.3_Europe_8500BP_5500BP   |
| FarmerEarly | PL_N36   | Poland        | Poland_Neolithic_BKG          | 50.67 | 21.38 | 6250.0 | 1.6699809730000000  | X<br>X | 2.3_EuropeCE_7000BP_5500BP |
| FarmerEarly | NE5      | Hungary       | Hungary_Neolithic_ALP         | 47.17 | 20.83 | 7050.0 | 0.784933195         | X<br>Y | 2.3_EuropeCE_7000BP_5500BP |
| FarmerEarly | PL_N31   | Poland        | Poland_Neolithic_BKG          | 52.61 | 18.8  | 6137.5 | 3.0038241510000000  | X<br>X | 2.3_EuropeCE_7000BP_5500BP |



|                    |           |          |                           |       |       |        |                    |    |                             |
|--------------------|-----------|----------|---------------------------|-------|-------|--------|--------------------|----|-----------------------------|
| <b>FarmerEarly</b> | NE1       | Hungary  | Hungary_Neolithic_LP      | 47.85 | 21.15 | 7138.5 | 18.42090683        | XX | 2.3_EuropeCE_7000BP_5500BP  |
| <b>FarmerEarly</b> | Stuttgart | Germany  | Germany_Neolithic         | 48.78 | 9.18  | 7140.0 | 16.19254244        | XX | 2.3_EuropeCE_7000BP_5500BP  |
| <b>FarmerEarly</b> | Bar31     | Turkey   | Anatolia_Neolithic        | 40.3  | 29.61 | 8278.5 | 3.6490902710000000 | XY | 2.3_Anatolia_10000BP_8000BP |
| <b>FarmerEarly</b> | Bar8      | Turkey   | Anatolia_Neolithic        | 40.3  | 29.61 | 8071.0 | 7.171025264        | XX | 2.3_Anatolia_10000BP_8000BP |
| <b>FarmerEarly</b> | NE6       | Hungary  | Hungary_Neolithic_LBK     | 47.17 | 19.83 | 7051.5 | 0.937998868        | XY | 2.3_EuropeCE_7000BP_5500BP  |
| <b>FarmerEarly</b> | PL_N25    | Poland   | Poland_Neolithic_BKG      | 52.61 | 18.8  | 6250.0 | 2.304346802        | XX | 2.3_EuropeCE_7000BP_5500BP  |
| <b>FarmerEarly</b> | PL_N26    | Poland   | Poland_Neolithic_BKG      | 50.67 | 21.38 | 6151.0 | 2.146927132        | XY | 2.3_EuropeCE_7000BP_5500BP  |
| <b>FarmerEarly</b> | PL_N19    | Poland   | Poland_Neolithic_FBC      | 52.62 | 18.96 | 5462.0 | 1.6841604730000000 | XX | 2.3_EuropeCE_7000BP_5500BP  |
| <b>FarmerEarly</b> | Pal7      | Greece   | Greece_Neolithic          | 40.51 | 22.5  | 6351.0 | 1.265496659        | XX | 2.3_EuropeCE_7000BP_5500BP  |
| <b>FarmerEarly</b> | PL_N28    | Poland   | Poland_Neolithic_BKG      | 52.61 | 18.8  | 6073.5 | 1.75499685         | XY | 2.3_EuropeCE_7000BP_5500BP  |
| <b>FarmerEarly</b> | Rev5      | Greece   | Greece_Neolithic          | 40.33 | 22.56 | 8301.0 | 1.133693538        | XX | 2.3_EuropeS_8000BP_6000BP   |
| <b>FarmerEarly</b> | Klei10    | Greece   | Greece_Neolithic          | 40.26 | 21.74 | 6062.5 | 2.047213233        | XY | 2.3_EuropeS_8000BP_6000BP   |
| <b>FarmerEarly</b> | NE2       | Hungary  | Hungary_Neolithic_LP      | 47.52 | 21.59 | 7123.5 | 0.148202309        | XX | 2.3_Europe_8500BP_5500BP    |
| <b>FarmerEarly</b> | PL_N27    | Poland   | Poland_Neolithic_BKG      | 52.61 | 18.8  | 6250.0 | 1.790218266        | XY | 2.3_EuropeCE_7000BP_5500BP  |
| <b>FarmerEarly</b> | NE7       | Hungary  | Hungary_Neolithic_Lengyel | 47.17 | 19.83 | 6374.0 | 0.909572155        | XY | 2.3_EuropeCE_7000BP_5500BP  |
| <b>FarmerLate</b>  | NEO119    | France   | France_Neolithic          | 44.47 | 4.77  | 4382.0 | 0.10885148         | XX | 2.2_EuropeSW_6000BP_3500BP  |
| <b>FarmerLate</b>  | NEO886    | Denmark  | Denmark_Neolithic         | 54.99 | 12.42 | 5457.0 | 0.271693685        | XY | 2.4_EuropeNE_5600BP_4600BP  |
| <b>FarmerLate</b>  | NEO925    | Denmark  | Denmark_Neolithic         | 54.77 | 10.68 | 4947.0 | 0.294332844        | XX | 2.4_EuropeNE_5600BP_4600BP  |
| <b>FarmerLate</b>  | NEO653    | Spain    | Iberia_BronzeAge          | 43.4  | -4.71 | 3423.0 | 0.283734421        | XX | 2.2_EuropeSW_6000BP_3500BP  |
| <b>FarmerLate</b>  | TV3831    | Portugal | Iberia_BronzeAge          | 37.94 | -7.6  | 3550.0 | 0.9943057240000000 | XY | 2.2_Iberia_7300BP_3500BP    |
| <b>FarmerLate</b>  | COV20126  | Spain    | Iberia_Neolithic          | 37.41 | -4.42 | 5588.0 | 0.303266123        | XY | 2.2_EuropeSW_6000BP_3500BP  |
| <b>FarmerLate</b>  | NEO896    | Denmark  | Denmark_Neolithic         | 54.97 | 12.49 | 5446.0 | 0.121712208        | XX | 2.4_EuropeNE_5600BP_4600BP  |
| <b>FarmerLate</b>  | NEO43     | Denmark  | Denmark_Neolithic         | 55.99 | 10.25 | 5067.0 | 0.108400524        | XY | 2.4_EuropeNE_5600BP_4600BP  |
| <b>FarmerLate</b>  | NEO39     | Sweden   | Sweden_Neolithic          | 55.57 | 13.04 | 5074.0 | 0.174678265        | XY | 2.4_EuropeNE_5600BP_4600BP  |

|            |              |          |                               |       |       |        |                     |        |                            |
|------------|--------------|----------|-------------------------------|-------|-------|--------|---------------------|--------|----------------------------|
| FarmerLate | TV32032extra | Portugal | Iberia_BronzeAge              | 37.94 | -7.6  | 3550.0 | 0.865992675         | X<br>Y | 2.2_Iberia_7300BP_3500BP   |
| FarmerLate | NEO744       | Denmark  | Denmark_Neolithic             | 55.86 | 11.59 | 5333.0 | 0.220878469         | X<br>Y | 2.4_EuropeNE_5600BP_4600BP |
| FarmerLate | MonteGato104 | Portugal | Iberia_BronzeAge              | 38.02 | -7.86 | 3535.0 | 1.236961027         | X<br>Y | 2.2_Iberia_7300BP_3500BP   |
| FarmerLate | NEO830       | Italy    | Italy_Neolithic               | 43.38 | 13.55 | 5393.0 | 0.104506976         | X<br>X | 2.2_EuropeSW_6000BP_3500BP |
| FarmerLate | NEO757       | Denmark  | Denmark_Neolithic             | 55.9  | 11.12 | 5452.0 | 0.129920601         | X<br>X | 2.4_EuropeNE_5600BP_4600BP |
| FarmerLate | atp9         | Spain    | Iberia_BronzeAge              | 42.35 | -3.52 | 3634.0 | 0.419041583         | X<br>X | 2.2_EuropeSW_6000BP_3500BP |
| FarmerLate | QUIN234      | France   | France_BronzeAge              | 43.3  | 1.96  | 3600.0 | 0.120622268         | X<br>X | 2.2_EuropeSW_6000BP_3500BP |
| FarmerLate | ROS102       | France   | France_Neolithic_Grossgartach | 48.5  | 7.47  | 6550.0 | 0.151456852         | X<br>Y | 2.3_Europe_8500BP_5500BP   |
| FarmerLate | NEO640       | Poland   | Poland_Neolithic_FBC          | 50.27 | 20.45 | 4902.0 | 0.20055724          | X<br>Y | 2.4_EuropeNE_5600BP_4600BP |
| FarmerLate | NEO609       | Portugal | Iberia_Neolithic              | 38.68 | -9.16 | 4333.0 | 0.134584406         | X<br>Y | 2.2_EuropeSW_6000BP_3500BP |
| FarmerLate | NEO599       | Denmark  | Denmark_Neolithic             | 55.55 | 11.68 | 5134.0 | 0.19019233          | X<br>Y | 2.4_EuropeNE_5600BP_4600BP |
| FarmerLate | NEO597       | Denmark  | Denmark_Neolithic             | 55.59 | 11.57 | 5210.0 | 0.177413333         | X<br>Y | 2.4_EuropeNE_5600BP_4600BP |
| FarmerLate | NEO595       | Denmark  | Denmark_Neolithic             | 55.79 | 11.29 | 5452.0 | 0.218556781         | X<br>Y | 2.4_EuropeNE_5600BP_4600BP |
| FarmerLate | ans016       | Sweden   | Sweden_Neolithic              | 57.34 | 18.26 | 4646.0 | 0.34085699700000000 | X<br>Y | 2.4_EuropeNE_5600BP_4600BP |
| FarmerLate | NEO945       | Denmark  | Denmark_Neolithic             | 56.49 | 9.83  | 5445.0 | 1.384502704         | X<br>X | 2.4_EuropeNE_5600BP_4600BP |
| FarmerLate | NEO25        | Denmark  | Denmark_Neolithic             | 56.43 | 10.79 | 4956.0 | 0.35636724800000000 | X<br>X | 2.4_EuropeNE_5600BP_4600BP |
| FarmerLate | ans005       | Sweden   | Sweden_Neolithic_Megalithic   | 57.34 | 18.26 | 5265.0 | 0.129055433         | X<br>X | 2.4_EuropeNE_5600BP_4600BP |
| FarmerLate | NEO721       | Spain    | Iberia_Neolithic              | 40.44 | -3.5  | 4170.0 | 0.35821067700000000 | X<br>X | 2.2_Iberia_7300BP_3500BP   |
| FarmerLate | NEO943       | Denmark  | Denmark_Neolithic             | 55.46 | 9.69  | 4614.0 | 1.754137916         | X<br>Y | 2.4_EuropeNE_5600BP_4600BP |
| FarmerLate | NEO942       | Denmark  | Denmark_Neolithic             | 55.58 | 11.29 | 5491.0 | 0.890575166         | X<br>X | 2.4_EuropeNE_5600BP_4600BP |
| FarmerLate | NEO753       | Denmark  | Denmark_Neolithic             | 55.77 | 12.21 | 5531.0 | 0.163364465         | X<br>X | 2.4_EuropeNE_5600BP_4600BP |
| FarmerLate | esp005       | Spain    | Iberia_BronzeAge_Cogotas      | 42.0  | -1    | 3370.0 | 2.457932356         | X<br>Y | 2.2_Iberia_7300BP_3500BP   |
| FarmerLate | pir001       | Spain    | Iberia_BronzeAge_Argar        | 37.89 | -4.78 | 3725.0 | 0.21560743100000000 | X<br>Y | 2.2_EuropeSW_6000BP_3500BP |
| FarmerLate | por004       | Spain    | Iberia_Neolithic              | 42.35 | -3.52 | 4955.0 | 0.129932409         | X<br>Y | 2.2_EuropeSW_6000BP_3500BP |

|                     |               |          |                             |       |       |        |                    |        |                                  |
|---------------------|---------------|----------|-----------------------------|-------|-------|--------|--------------------|--------|----------------------------------|
| <b>FarmerLate</b>   | san216        | Spain    | Iberia_Neolithic            | 42.69 | -2.73 | 5665.5 | 0.200001027        | X<br>Y | 2.2_EuropeSW_6000BP_3500BP       |
| <b>FarmerLate</b>   | ans003        | Sweden   | Sweden_Neolithic_Megalithic | 57.34 | 18.26 | 5250.0 | 0.135654055        | X<br>X | 2.4_EuropeNE_5600BP_4600BP       |
| <b>FarmerLate</b>   | ValeOuro10207 | Portugal | Iberia_BronzeAge            | 38.06 | -8.11 | 3550.0 | 0.248412062        | X<br>X | 2.2_EuropeSW_6000BP_3500BP       |
| <b>FarmerMiddle</b> | NEO121        | France   | France_Neolithic            | 44.47 | 4.77  | 4531.0 | 0.530892193        | X<br>Y | 2.2_EuropeSW_6000BP_3500BP       |
| <b>FarmerMiddle</b> | NEO28         | Denmark  | Denmark_Neolithic           | 55.91 | 12.31 | 5459.0 | 0.922300627        | X<br>Y | 2.4_EuropeNE_5600BP_4600BP       |
| <b>FarmerMiddle</b> | NEO36         | Sweden   | Sweden_Neolithic            | 55.57 | 13.04 | 5097.0 | 2.384739487        | X<br>X | 2.4_EuropeNE_5600BP_4600BP       |
| <b>FarmerMiddle</b> | NEO29         | Denmark  | Denmark_Neolithic           | 55.13 | 10.9  | 5489.0 | 0.530600133        | X<br>X | 2.4_EuropeNE_5600BP_4600BP       |
| <b>FarmerMiddle</b> | NEO23         | Denmark  | Denmark_Neolithic           | 55.6  | 11.31 | 5533.0 | 3.33772768         | X<br>Y | 2.4_EuropeNE_5600BP_4600BP       |
| <b>FarmerMiddle</b> | WET370        | France   | France_Neolithic            | 48.06 | 7.3   | 5521.0 | 0.172865405        | X<br>Y | 2.2_EuropeAtlantic_7000BP_5000BP |
| <b>FarmerMiddle</b> | NEO866        | Denmark  | Denmark_Neolithic           | 54.87 | 11.84 | 5456.0 | 1.521286722        | X<br>Y | 2.4_EuropeNE_5600BP_4600BP       |
| <b>FarmerMiddle</b> | NEO891        | Denmark  | Denmark_Neolithic           | 55.73 | 12.1  | 5661.0 | 0.595471133        | X<br>X | 2.4_EuropeNE_5600BP_4600BP       |
| <b>FarmerMiddle</b> | ans017        | Sweden   | Sweden_Neolithic_Megalithic | 57.34 | 18.26 | 5080.0 | 7.08351096         | X<br>Y | 2.4_EuropeNE_5600BP_4600BP       |
| <b>FarmerMiddle</b> | CO1           | Hungary  | Hungary_Neolithic_Baden     | 47.17 | 19.83 | 4750.0 | 0.8595327420000000 | X<br>X | 2.3_EuropeS_8000BP_6000BP        |
| <b>FarmerMiddle</b> | RISE489       | Italy    | Italy_Neolithic             | 45.26 | 10.38 | 4693.0 | 0.50758911         | X<br>Y | 2.2_EuropeSW_6000BP_3500BP       |
| <b>FarmerMiddle</b> | NEO641        | Poland   | Poland_Neolithic_FBC        | 50.27 | 20.45 | 5132.0 | 0.26184454         | X<br>X | 2.3_EuropeS_8000BP_6000BP        |
| <b>FarmerMiddle</b> | NEO630        | UK       | Britain_Neolithic           | 58.73 | -2.94 | 4898.0 | 0.211902615        | X<br>Y | 2.2_EuropeAtlantic_7000BP_5000BP |
| <b>FarmerMiddle</b> | NEO627        | UK       | Britain_Neolithic           | 58.73 | -2.94 | 5132.0 | 0.4495226710000000 | X<br>Y | 2.2_EuropeAtlantic_7000BP_5000BP |
| <b>FarmerMiddle</b> | NEO626        | UK       | Britain_Neolithic           | 58.73 | -2.94 | 5082.0 | 0.3719390520000000 | X<br>Y | 2.2_EuropeAtlantic_7000BP_5000BP |
| <b>FarmerMiddle</b> | NEO624        | UK       | Britain_Neolithic           | 58.73 | -2.94 | 4897.0 | 2.099933966        | X<br>X | 2.2_EuropeAtlantic_7000BP_5000BP |
| <b>FarmerMiddle</b> | NEO717        | UK       | Britain_Neolithic           | 58.73 | -2.94 | 4893.0 | 0.481287489        | X<br>Y | 2.2_EuropeAtlantic_7000BP_5000BP |
| <b>FarmerMiddle</b> | NEO935        | Denmark  | Denmark_Neolithic           | 55.56 | 12.02 | 5187.0 | 5.027509563        | X<br>Y | 2.4_EuropeNE_5600BP_4600BP       |
| <b>FarmerMiddle</b> | NEO933        | Denmark  | Denmark_Neolithic           | 55.25 | 10.75 | 5337.0 | 0.522015892        | X<br>Y | 2.4_EuropeNE_5600BP_4600BP       |
| <b>FarmerMiddle</b> | Aveline_1     | UK       | Britain_Neolithic           | 51.32 | -2.75 | 5489.5 | 0.782428624        | X<br>X | 2.2_EuropeAtlantic_7000BP_5000BP |
| <b>FarmerMiddle</b> | NEO142        | Hungary  | Hungary_Neolithic_Tisza     | 46.37 | 20.42 | 6641.0 | 0.895629723        | X<br>X | 2.3_Europe_8500BP_5500BP         |

|              |                      |         |                        |       |       |        |                     |        |                                  |
|--------------|----------------------|---------|------------------------|-------|-------|--------|---------------------|--------|----------------------------------|
| FarmerMiddle | BurnGround           | UK      | Britain_Neolithic      | 51.84 | -1.85 | 5770.0 | 0.410850116         | X<br>Y | 2.2_EuropeAtlantic_7000BP_5000BP |
| FarmerMiddle | CaveHa3_1            | UK      | Britain_Neolithic      | 54.07 | -2.29 | 5264.0 | 0.112689685         | X<br>Y | 2.2_EuropeAtlantic_7000BP_5000BP |
| FarmerMiddle | Coldrum_1            | UK      | Britain_Neolithic      | 51.32 | 0.37  | 5430.0 | 0.547611201         | X<br>Y | 2.2_EuropeAtlantic_7000BP_5000BP |
| FarmerMiddle | Embo_1               | UK      | Britain_Neolithic      | 57.91 | -4    | 5050.0 | 0.127757081         | X<br>X | 2.2_EuropeAtlantic_7000BP_5000BP |
| FarmerMiddle | Fussels_Lodge_1      | UK      | Britain_Neolithic      | 51.09 | -1.73 | 5657.5 | 0.73024687          | X<br>X | 2.2_EuropeAtlantic_7000BP_5000BP |
| FarmerMiddle | Jubilee_cave         | UK      | Britain_Neolithic      | 54.08 | -2.27 | 5462.5 | 0.116653425         | X<br>Y | 2.2_EuropeAtlantic_7000BP_5000BP |
| FarmerMiddle | Kelco_cave           | UK      | Britain_Neolithic      | 54.07 | -2.29 | 5536.0 | 0.115486462         | X<br>Y | 2.2_EuropeAtlantic_7000BP_5000BP |
| FarmerMiddle | Ballynahatty         | Ireland | Ireland_Neolithic      | 54.54 | -5.96 | 5131.5 | 10.0157214          | X<br>X | 2.2_EuropeAtlantic_7000BP_5000BP |
| FarmerMiddle | PL_N18               | Poland  | Poland_Neolithic_FBC   | 52.62 | 18.96 | 5462.5 | 1.909978283         | X<br>X | 2.4_EuropeNE_5600BP_4600BP       |
| FarmerMiddle | PSS4693              | France  | France_Neolithic_Noyen | 48.52 | 3.6   | 5438.5 | 0.740638747         | X<br>X | 2.2_EuropeAtlantic_7000BP_5000BP |
| FarmerMiddle | PL_N38               | Poland  | Poland_Neolithic_GAC   | 52.61 | 18.9  | 5033.0 | 1.7720028230000000  | X<br>X | 2.4_Poland_5000BP_4700BP         |
| FarmerMiddle | Carsington_pasture_1 | UK      | Britain_Neolithic      | 53.08 | -1.64 | 5538.5 | 9.748563794000000   | X<br>Y | 2.2_EuropeAtlantic_7000BP_5000BP |
| FarmerMiddle | PL_N20               | Poland  | Poland_Neolithic_FBC   | 52.62 | 18.96 | 5462.0 | 0.8023952120000000  | X<br>Y | 2.4_EuropeNE_5600BP_4600BP       |
| FarmerMiddle | Mor6                 | France  | France_Neolithic_LBK   | 48.82 | 7.63  | 7036.0 | 0.16119936100000000 | X<br>X | 2.2_EuropeAtlantic_7000BP_5000BP |
| FarmerMiddle | ros3                 | Sweden  | Sweden_Neolithic_FBC   | 60.26 | 16.41 | 4955.0 | 0.38093967100000000 | X<br>X | 2.4_EuropeNE_5600BP_4600BP       |
| FarmerMiddle | RISE1161             | Poland  | Poland_Neolithic_GAC   | 48.7  | 21.2  | 4757.0 | 1.366034772         | X<br>X | 2.4_Poland_5000BP_4700BP         |
| FarmerMiddle | RISE1165             | Poland  | Poland_Neolithic_GAC   | 48.7  | 21.2  | 4742.5 | 2.189830631         | X<br>Y | 2.4_Poland_5000BP_4700BP         |
| FarmerMiddle | RISE1166             | Poland  | Poland_Neolithic_GAC   | 48.7  | 21.2  | 4907.5 | 3.058742732         | X<br>X | 2.4_Poland_5000BP_4700BP         |
| FarmerMiddle | RISE1249             | Poland  | Poland_Neolithic_GAC   | 50.2  | 21.4  | 4736.5 | 1.0104430690000000  | X<br>X | 2.4_Poland_5000BP_4700BP         |
| FarmerMiddle | RISE1248             | Poland  | Poland_Neolithic_GAC   | 50.2  | 21.4  | 4725.0 | 0.7995153760000000  | X<br>X | 2.4_Poland_5000BP_4700BP         |
| FarmerMiddle | RISE1246             | Poland  | Poland_Neolithic_GAC   | 50.2  | 21.4  | 4715.0 | 0.549865829         | X<br>X | 2.4_Poland_5000BP_4700BP         |
| FarmerMiddle | RISE1252             | Poland  | Poland_Neolithic_GAC   | 50.8  | 21.5  | 4725.0 | 0.43094765800000000 | X<br>Y | 2.4_Poland_5000BP_4700BP         |
| FarmerMiddle | RISE1250             | Poland  | Poland_Neolithic_GAC   | 50.6  | 21.7  | 4725.0 | 0.493666575         | X<br>Y | 2.4_Poland_5000BP_4700BP         |
| FarmerMiddle | RISE1254             | Poland  | Poland_Neolithic_GAC   | 51.1  | 17.1  | 4725.0 | 0.437402634         | X<br>Y | 2.4_Poland_5000BP_4700BP         |

|              |            |         |                               |       |       |        |                    |    |                                  |
|--------------|------------|---------|-------------------------------|-------|-------|--------|--------------------|----|----------------------------------|
| FarmerMiddle | Gok2       | Sweden  | Sweden_Neolithic_FBC          | 58.18 | 13.41 | 4850.0 | 1.220935916        | XX | 2.4_EuropeNE_5600BP_4600BP       |
| FarmerMiddle | NEO847     | UK      | Britain_Neolithic             | 51.7  | -2.3  | 5463.0 | 1.777915755        | XY | 2.2_EuropeAtlantic_7000BP_5000BP |
| FarmerMiddle | ros005     | Sweden  | Sweden_Neolithic_FBC          | 60.26 | 16.41 | 4740.0 | 0.886088897        | XY | 2.4_EuropeNE_5600BP_4600BP       |
| FarmerMiddle | PEI 2.00   | France  | France_Neolithic_Campaniforme | 43.14 | 2.25  | 4385.5 | 0.302517672        | XY | 2.2_EuropeSW_6000BP_3500BP       |
| FarmerMiddle | R1014      | Italy   | Italy_Neolithic               | 41.37 | 13.29 | 4950.0 | 0.615266206        | XY | 2.2_Italy_7000BP_4000BP          |
| FarmerMiddle | R104       | Italy   | Italy_LateAntiquity           | 41.89 | 12.48 | 1450.0 | 0.879014223        | XY | 2.2_Italy_7000BP_4000BP          |
| FarmerMiddle | RISE1159   | Poland  | Poland_Neolithic_GAC          | 48.7  | 21.2  | 4730.0 | 27.46258284        | XX | 2.4_Poland_5000BP_4700BP         |
| FarmerMiddle | RISE1170   | Poland  | Poland_Neolithic_GAC          | 48.7  | 21.2  | 4748.5 | 3.79009955         | XX | 2.4_Poland_5000BP_4700BP         |
| FarmerMiddle | RISE1168   | Poland  | Poland_Neolithic_GAC          | 48.7  | 21.2  | 4676.0 | 18.93418868        | XY | N/A                              |
| FarmerMiddle | mur        | Spain   | Iberia_Neolithic_Almagra      | 42.35 | -3.52 | 7136.0 | 3.4675614490000000 | XY | 2.2_Iberia_7300BP_3500BP         |
| FarmerMiddle | lai001     | UK      | Britain_Neolithic             | 59.13 | -3.05 | 5180.0 | 0.225980982        | XY | 2.2_EuropeAtlantic_7000BP_5000BP |
| FarmerMiddle | mid001     | UK      | Britain_Neolithic_Megalithic  | 59.13 | -3.05 | 5450.0 | 0.282625993        | XY | 2.2_EuropeAtlantic_7000BP_5000BP |
| FarmerMiddle | mid002     | UK      | Britain_Neolithic_Megalithic  | 57.75 | -3.92 | 5180.0 | 0.2557871540000000 | XY | 2.2_EuropeAtlantic_7000BP_5000BP |
| FarmerMiddle | prs002     | Ireland | Ireland_Neolithic_Megalithic  | 54.25 | -8.56 | 5675.0 | 5.870842597        | XX | 2.2_EuropeAtlantic_7000BP_5000BP |
| FarmerMiddle | prs003     | Ireland | Ireland_Neolithic_Megalithic  | 54.25 | -8.56 | 5600.0 | 0.2237872080000000 | XY | 2.2_EuropeAtlantic_7000BP_5000BP |
| FarmerMiddle | prs006     | Ireland | Ireland_Neolithic_Megalithic  | 54.25 | -8.56 | 5330.0 | 0.2635244420000000 | XX | 2.2_EuropeAtlantic_7000BP_5000BP |
| FarmerMiddle | prs009     | Ireland | Ireland_Neolithic_Megalithic  | 54.25 | -8.56 | 5310.0 | 7.571866381        | XY | 2.2_EuropeAtlantic_7000BP_5000BP |
| FarmerMiddle | NEO823     | Italy   | Italy_BronzeAge               | 40.88 | 16.73 | 4665.0 | 0.404577629        | XY | 2.2_Italy_7000BP_4000BP          |
| FarmerMiddle | prs010     | Ireland | Ireland_Neolithic_Megalithic  | 54.25 | -8.56 | 5530.0 | 0.2320574680000000 | XY | 2.2_EuropeAtlantic_7000BP_5000BP |
| FarmerMiddle | prs013     | Ireland | Ireland_Neolithic_Megalithic  | 54.25 | -8.56 | 5320.0 | 4.952996849        | XY | 2.2_EuropeAtlantic_7000BP_5000BP |
| FarmerMiddle | prs016     | Ireland | Ireland_Neolithic_Megalithic  | 54.25 | -8.56 | 5560.0 | 8.754512586        | XY | 2.2_EuropeAtlantic_7000BP_5000BP |
| FarmerMiddle | ans008     | Sweden  | Sweden_Neolithic_Megalithic   | 57.34 | 18.26 | 5135.0 | 2.027487661        | XY | 2.4_EuropeNE_5600BP_4600BP       |
| FarmerMiddle | CB13       | Spain   | Iberia_Neolithic_Cardial      | 41.37 | 1.89  | 7348.0 | 0.931947851        | XX | 2.2_Iberia_7300BP_3500BP         |
| FarmerMiddle | atp016     | Spain   | Iberia_Neolithic              | 42.35 | -3.52 | 5039.5 | 13.20832827        | XX | 2.2_Iberia_7300BP_3500BP         |
| FarmerMiddle | atp12-1420 | Spain   | Iberia_Neolithic              | 42.35 | -3.52 | 4895.5 | 2.528221016        | XY | 2.2_Iberia_7300BP_3500BP         |

|                     |                  |          |                                  |       |       |        |                     |        |                                  |
|---------------------|------------------|----------|----------------------------------|-------|-------|--------|---------------------|--------|----------------------------------|
| <b>FarmerMiddle</b> | c40331           | Spain    | Iberia_Neolithic                 | 37.37 | -4.25 | 5649.5 | 0.293459982         | X<br>Y | 2.2_Iberia_7300BP_3500BP         |
| <b>FarmerMiddle</b> | prs012           | Ireland  | Ireland_Neolithic_Megalithic     | 54.25 | -8.56 | 5660.0 | 0.25153112700000000 | X<br>Y | 2.2_EuropeAtlantic_7000BP_5000BP |
| <b>FarmerMiddle</b> | LugarCanto44     | Portugal | Iberia_Neolithic                 | 39.42 | -8.82 | 5950.0 | 2.016550504         | X<br>X | 2.2_Iberia_7300BP_3500BP         |
| <b>FarmerMiddle</b> | RISE1241         | Poland   | Poland_Neolithic_GAC             | 50.6  | 21.7  | 4752.5 | 0.859098485         | X<br>Y | 2.4_Poland_5000BP_4700BP         |
| <b>FarmerMiddle</b> | R22              | Italy    | Italy_Neolithic                  | 40.81 | 8.44  | 3895.5 | 0.776104455         | X<br>X | 2.2_Italy_7000BP_4000BP          |
| <b>FarmerMiddle</b> | BERG157-2        | France   | France_Neolithic_BORSMichelsberg | 43.22 | 2.41  | 6050.0 | 0.346274491         | X<br>X | 2.2_EuropeAtlantic_7000BP_5000BP |
| <b>FarmerMiddle</b> | BERG157-7        | France   | France_Neolithic_BORSMichelsberg | 43.22 | 2.41  | 6131.5 | 0.267013925         | X<br>Y | 2.2_EuropeSW_6000BP_3500BP       |
| <b>FarmerMiddle</b> | CabecoArruda117B | Portugal | Iberia_Neolithic                 | 39.11 | -8.66 | 5050.0 | 0.376607974         | X<br>Y | 2.2_Iberia_7300BP_3500BP         |
| <b>FarmerMiddle</b> | BLP10            | France   | France_Neolithic_Michelsberg     | 49.39 | 3.74  | 6052.0 | 0.18285663600000000 | X<br>Y | 2.2_EuropeAtlantic_7000BP_5000BP |
| <b>FarmerMiddle</b> | BUCH2            | France   | France_Neolithic_Cemy            | 48.24 | 4.11  | 6250.0 | 0.36476039200000000 | X<br>Y | 2.2_EuropeSW_6000BP_3500BP       |
| <b>FarmerMiddle</b> | NEO812           | France   | France_Neolithic_Cardial         | 43.32 | 2.42  | 6545.0 | 6.542360034         | X<br>X | 2.2_Iberia_7300BP_3500BP         |
| <b>FarmerMiddle</b> | CRE20D           | France   | France_Neolithic_ChasseenAncien  | 43.21 | 3.13  | 6151.0 | 0.256045807         | X<br>X | 2.2_EuropeSW_6000BP_3500BP       |
| <b>FarmerMiddle</b> | LugarCanto42     | Portugal | Iberia_Neolithic                 | 39.42 | -8.82 | 5950.0 | 3.006333862         | X<br>X | 2.2_Iberia_7300BP_3500BP         |
| <b>FarmerMiddle</b> | LU339            | Portugal | Iberia_Neolithic                 | 41.71 | -6.93 | 6797.5 | 4.60334026          | X<br>Y | 2.2_Iberia_7300BP_3500BP         |
| <b>FarmerMiddle</b> | LD270            | Portugal | Iberia_Neolithic                 | 41.71 | -6.93 | 6336.0 | 4.064587193         | X<br>Y | 2.2_Iberia_7300BP_3500BP         |
| <b>FarmerMiddle</b> | LD1174           | Spain    | Iberia_Neolithic                 | 37.41 | -4.42 | 6415.0 | 3.558801721         | X<br>X | 2.2_Iberia_7300BP_3500BP         |
| <b>FarmerMiddle</b> | CabecoArruda122A | Portugal | Iberia_Neolithic                 | 39.11 | -8.66 | 5050.0 | 1.782958508         | X<br>Y | 2.2_Iberia_7300BP_3500BP         |
| <b>FarmerMiddle</b> | CovaMoura364     | Portugal | Iberia_Neolithic                 | 38.75 | -9.22 | 4900.0 | 0.794100402         | X<br>Y | 2.2_Iberia_7300BP_3500BP         |
| <b>FarmerMiddle</b> | Es97-1           | France   | France_Neolithic_Michelsberg     | 50.92 | 1.71  | 6004.5 | 0.294790665         | X<br>Y | 2.2_EuropeAtlantic_7000BP_5000BP |
| <b>FarmerMiddle</b> | NEO790           | Denmark  | Denmark_Neolithic                | 55.71 | 12.27 | 5663.0 | 0.685227719         | X<br>Y | 2.4_EuropeNE_5600BP_4600BP       |
| <b>FarmerMiddle</b> | CovaMoura9B      | Portugal | Iberia_Neolithic                 | 38.75 | -9.22 | 4900.0 | 2.611737333         | X<br>X | 2.2_Iberia_7300BP_3500BP         |
| <b>FarmerMiddle</b> | R6               | Italy    | Italy_Neolithic                  | 41.96 | 13.54 | 7159.5 | 0.604714196         | X<br>Y | 2.2_Italy_7000BP_4000BP          |
| <b>FarmerMiddle</b> | bal004           | UK       | Britain_Neolithic_Megalithic     | 57.77 | -3.9  | 5190.0 | 1.56791032700000000 | X<br>X | 2.2_EuropeAtlantic_7000BP_5000BP |
| <b>FarmerMiddle</b> | R24              | Italy    | Italy_Neolithic                  | 40.81 | 8.44  | 5450.0 | 0.549967737         | X<br>X | 2.2_Italy_7000BP_4000BP          |
| <b>FarmerMiddle</b> | R25              | Italy    | Italy_Neolithic                  | 40.81 | 8.44  | 4150.0 | 0.53976087          | X<br>X | 2.2_Italy_7000BP_4000BP          |

|                     |                   |          |                                  |       |       |        |                    |        |                            |
|---------------------|-------------------|----------|----------------------------------|-------|-------|--------|--------------------|--------|----------------------------|
| <b>FarmerMiddle</b> | R26               | Italy    | Italy_Neolithic                  | 40.81 | 8.44  | 4150.0 | 0.525953541        | X<br>Y | 2.2_Italy_7000BP_400BP     |
| <b>FarmerMiddle</b> | R27               | Italy    | Italy_Neolithic                  | 40.81 | 8.44  | 4150.0 | 0.70739547         | X<br>Y | 2.2_Italy_7000BP_400BP     |
| <b>FarmerMiddle</b> | R29               | Italy    | Italy_Neolithic                  | 40.81 | 8.44  | 4150.0 | 0.559161215        | X<br>Y | 2.2_Italy_7000BP_400BP     |
| <b>FarmerMiddle</b> | R28               | Italy    | Italy_Neolithic                  | 40.81 | 8.44  | 4150.0 | 0.728827575        | X<br>X | 2.2_Italy_7000BP_400BP     |
| <b>FarmerMiddle</b> | Dolmen Ansião 96B | Portugal | Iberia_Neolithic                 | 39.75 | -8.81 | 5450.0 | 1.962153759        | X<br>Y | 2.2_Iberia_7300BP_350BP    |
| <b>FarmerMiddle</b> | R4                | Italy    | Italy_Neolithic                  | 41.96 | 13.54 | 4865.0 | 3.6761982310000000 | X<br>Y | 2.2_Italy_7000BP_4000BP    |
| <b>FarmerMiddle</b> | R5                | Italy    | Italy_Neolithic                  | 41.96 | 13.54 | 4839.5 | 1.5029056810000000 | X<br>X | 2.2_Italy_7000BP_4000BP    |
| <b>FarmerMiddle</b> | LugarCanto41      | Portugal | Iberia_Neolithic                 | 39.42 | -8.82 | 5950.0 | 1.06714512         | X<br>X | 2.2_Iberia_7300BP_350BP    |
| <b>FarmerMiddle</b> | BERG02-2          | France   | France_Neolithic_BORSMichelsberg | 43.22 | 2.41  | 5870.0 | 0.344146565        | X<br>X | 2.2_EuropeSW_6000BP_3500BP |
| <b>WHG</b>          | NEO855            | Denmark  | Denmark_Mesolithic               | 56.4  | 10.72 | 6302.0 | 1.3829770000000000 | X<br>Y | 4.2_Denmark_10500BP_6000BP |
| <b>WHG</b>          | NEO856            | Denmark  | Denmark_Mesolithic               | 56.37 | 10.64 | 6777.0 | 0.56205807         | X<br>X | 4.2_Denmark_10500BP_6000BP |
| <b>WHG</b>          | NEO679            | Sweden   | Sweden_Mesolithic                | 55.39 | 13.48 | 6834.0 | 0.164673359        | X<br>X | 4.2_Denmark_10500BP_6000BP |
| <b>WHG</b>          | NEO683            | Denmark  | Denmark_Mesolithic               | 55.4  | 9.83  | 7529.0 | 1.81852777         | X<br>X | 4.2_Denmark_10500BP_6000BP |
| <b>WHG</b>          | NEO938            | Spain    | Iberia_Mesolithic                | 43.4  | -4.71 | 7878.0 | 0.4751514570000000 | X<br>X | 4.2_Iberia_9000BP_700BP    |
| <b>WHG</b>          | NEO694            | Spain    | Iberia_Mesolithic                | 38.73 | -0.46 | 9217.0 | 0.2847588340000000 | X<br>Y | 4.2_Iberia_9000BP_700BP    |
| <b>WHG</b>          | NEO853            | Denmark  | Denmark_Mesolithic               | 55.55 | 10.62 | 6047.0 | 1.964862968        | X<br>X | 4.2_Denmark_10500BP_6000BP |
| <b>WHG</b>          | NEO852            | Denmark  | Denmark_Mesolithic               | 56.03 | 10.26 | 6308.0 | 0.189591791        | X<br>X | 4.2_Denmark_10500BP_6000BP |
| <b>WHG</b>          | NEO733            | Denmark  | Denmark_Mesolithic               | 55.77 | 11.39 | 6824.0 | 1.3166819510000000 | X<br>X | 4.2_Denmark_10500BP_6000BP |
| <b>WHG</b>          | NEO791            | Denmark  | Denmark_Mesolithic               | 55.33 | 11.15 | 7048.0 | 2.492448215        | X<br>Y | 4.2_Denmark_10500BP_6000BP |
| <b>WHG</b>          | NEO941            | Denmark  | Denmark_Mesolithic               | 56.71 | 10.17 | 6372.0 | 0.135296816        | X<br>X | 4.2_Denmark_10500BP_6000BP |
| <b>WHG</b>          | NEO751            | Denmark  | Denmark_Mesolithic               | 56.87 | 9.22  | 6343.0 | 0.297822065        | X<br>Y | 4.2_Denmark_10500BP_6000BP |
| <b>WHG</b>          | NEO932            | Denmark  | Denmark_Mesolithic               | 55.25 | 11.23 | 7499.0 | 2.7601622000000000 | X<br>X | 4.2_Denmark_10500BP_6000BP |
| <b>WHG</b>          | NEO749            | Denmark  | Denmark_Mesolithic               | 55.85 | 12.56 | 7070.0 | 1.905133435        | X<br>Y | 4.2_Denmark_10500BP_6000BP |
| <b>WHG</b>          | NEO747            | Denmark  | Denmark_Mesolithic               | 55.85 | 12.56 | 6729.0 | 0.2494273580000000 | X<br>Y | 4.2_Denmark_10500BP_6000BP |
| <b>WHG</b>          | NEO745            | Denmark  | Denmark_Mesolithic               | 55.85 | 12.56 | 6790.0 | 0.447895875        | X<br>Y | 4.2_Denmark_10500BP_6000BP |
| <b>WHG</b>          | NEO960            | Denmark  | Denmark_Mesolithic               | 55.58 | 11.58 | 5926.0 | 0.150141897        | X<br>Y | 4.2_Denmark_10500BP_6000BP |

|     |             |             |                         |       |       |         |                    |        |                            |
|-----|-------------|-------------|-------------------------|-------|-------|---------|--------------------|--------|----------------------------|
| WHG | NEO759      | Denmark     | Denmark_Mesolithic      | 55.4  | 12.37 | 9028.0  | 2.948103712        | X<br>Y | 4.2_Denmark_10500BP_6000BP |
| WHG | sylltholm   | Denmark     | Denmark_Mesolithic      | 54.65 | 11.35 | 7709.5  | 2.291787968        | X<br>X | 4.2_Denmark_10500BP_6000BP |
| WHG | NEO648      | Spain       | Iberia_Mesolithic       | 43.4  | -4.71 | 7539.0  | 1.844283075        | X<br>Y | 4.2_Iberia_9000BP_7000BP   |
| WHG | Cheddar_man | UK          | Britain_Mesolithic      | 51.28 | -2.77 | 10300.0 | 2.054202123        | X<br>Y | 4.2_EuropeW_13500BP_8000BP |
| WHG | PL_N22      | Poland      | Poland_Neolithic_BKG    | 52.61 | 18.9  | 6291.0  | 1.491551035        | X<br>X | 4.2_EuropeE_8600BP_6000BP  |
| WHG | KO1         | Hungary     | Hungary_Neolithic_Koros | 47.56 | 20.72 | 7660.0  | 1.014600016        | X<br>Y | 4.2_EuropeE_8600BP_6000BP  |
| WHG | Canes1      | Spain       | Iberia_Mesolithic       | 43.36 | -4.72 | 7115.0  | 1.6461215340000000 | X<br>X | 4.2_Iberia_9000BP_7000BP   |
| WHG | Chan        | Spain       | Iberia_Mesolithic       | 42.73 | -7.03 | 9131.0  | 5.008215765        | X<br>X | 4.2_Iberia_9000BP_7000BP   |
| WHG | Bichon      | Switzerland | Switzerland_Mesolithic  | 47.1  | 6.87  | 13665.0 | 7.692393112        | X<br>Y | 4.2_EuropeW_13500BP_8000BP |
| WHG | Loschbour   | Luxembourg  | Luxembourg_Mesolithic   | 49.81 | 6.4   | 8050.0  | 18.23029647        | X<br>Y | 4.2_EuropeW_13500BP_8000BP |
| WHG | Brana       | Spain       | Iberia_Mesolithic       | 42.91 | -5.38 | 7815.0  | 3.019525774        | X<br>Y | 4.2_Iberia_9000BP_7000BP   |
| WHG | R11         | Italy       | Italy_Mesolithic        | 41.96 | 13.54 | 11908.0 | 0.957641603        | X<br>Y | 4.2_Italy_15000BP_9000BP   |
| WHG | NEO669      | Serbia      | Serbia_Mesolithic       | 44.56 | 22.03 | 7950.0  | 0.23932044         | X<br>X | 4.2_EuropeE_8600BP_6000BP  |
| WHG | R7          | Italy       | Italy_Mesolithic        | 41.96 | 13.54 | 10681.5 | 3.153769086        | X<br>Y | 4.2_Italy_15000BP_9000BP   |
| WHG | ST3         | Italy       | Italy_Mesolithic        | 37.85 | 14.7  | 14800.0 | 0.475034886        | X<br>Y | 4.2_Italy_15000BP_9000BP   |
| WHG | PER1150503  | France      | France_Mesolithic       | 45.77 | 0.33  | 9067.0  | 0.315139903        | X<br>X | 4.2_EuropeW_13500BP_8000BP |
| WHG | PER3023     | France      | France_Mesolithic       | 45.77 | 0.33  | 9067.0  | 0.161333797        | X<br>X | 4.2_EuropeW_13500BP_8000BP |
| WHG | R15         | Italy       | Italy_Mesolithic        | 41.96 | 13.54 | 9124.5  | 3.070164483        | X<br>Y | 4.2_Italy_15000BP_9000BP   |
| WHG | NEO91       | Denmark     | Denmark_Mesolithic      | 55.39 | 12.31 | 9122.0  | 1.176549838        | X<br>Y | 4.2_Denmark_10500BP_6000BP |
| WHG | NEO646      | Spain       | Iberia_Mesolithic       | 43.4  | -4.71 | 8273.0  | 1.590267827        | X<br>X | 4.2_Iberia_9000BP_7000BP   |
| WHG | NEO645      | Denmark     | Denmark_Mesolithic      | 55.91 | 11.09 | 5870.0  | 0.211986752        | X<br>Y | 4.2_Denmark_10500BP_6000BP |
| WHG | NEO598      | Denmark     | Denmark_Mesolithic      | 55.95 | 11.9  | 6075.0  | 0.7272044320000000 | X<br>X | 4.2_Denmark_10500BP_6000BP |
| WHG | NEO19       | Denmark     | Denmark_Mesolithic      | 56.27 | 10.47 | 8163.0  | 3.262849417        | X<br>Y | 4.2_Denmark_10500BP_6000BP |
| WHG | NEO586      | Denmark     | Denmark_Mesolithic      | 56.37 | 10.57 | 7031.0  | 0.201188562        | X<br>Y | 4.2_Denmark_10500BP_6000BP |
| WHG | NEO583      | Denmark     | Denmark_Mesolithic      | 56.37 | 10.57 | 6981.0  | 0.1763990890000000 | X<br>X | 4.2_Denmark_10500BP_6000BP |
| WHG | NEO570      | Denmark     | Denmark_Mesolithic      | 56.4  | 10.72 | 6369.0  | 2.861753026        | X<br>X | 4.2_Denmark_10500BP_6000BP |



|         |            |            |                              |       |       |         |                   |        |                            |
|---------|------------|------------|------------------------------|-------|-------|---------|-------------------|--------|----------------------------|
| WHG     | NEO589     | Denmark    | Denmark_Mesolithic           | 55.33 | 11.15 | 7478.0  | 7.410700578000000 | X<br>Y | 4.2_Denmark_10500BP_6000BP |
| WHG     | NEO254     | Denmark    | Denmark_Mesolithic           | 55.4  | 10.13 | 10463.0 | 0.41962998        | X<br>Y | 4.2_Denmark_10500BP_6000BP |
| WHG     | NEO123     | Denmark    | Denmark_Mesolithic           | 54.96 | 11.85 | 8182.0  | 0.286386228       | X<br>X | 4.2_Denmark_10500BP_6000BP |
| WHG     | NEO122     | Denmark    | Denmark_Mesolithic           | 54.96 | 11.85 | 8146.0  | 0.564966744       | X<br>X | 4.2_Denmark_10500BP_6000BP |
| WHG     | NEO568     | Denmark    | Denmark_Mesolithic           | 56.81 | 9.18  | 6586.0  | 1.981486947000000 | X<br>Y | 4.2_Denmark_10500BP_6000BP |
| Yamnaya | poz81      | Poland     | Poland_Neolithic_CWC         | 52.29 | 17.55 | 4705.0  | 1.92879788        | X<br>Y | 1.2_EuropeNE_4800BP_3000BP |
| Yamnaya | RISE509    | Russia     | Siberia_BronzeAge_Afanasiovo | 54.36 | 90.92 | 4732.0  | 4.52834127        | X<br>X | 1.2_Steppe_5000BP_4300BP   |
| Yamnaya | RISE511    | Russia     | Siberia_BronzeAge_Afanasiovo | 54.36 | 90.92 | 4744.0  | 5.20403929        | X<br>X | 1.2_Steppe_5000BP_4300BP   |
| Yamnaya | RISE546    | Russia     | Russia_BronzeAge_Yamnaya     | 46.54 | 43.7  | 4850.0  | 0.125905828       | X<br>Y | 1.2_Steppe_5000BP_4300BP   |
| Yamnaya | RISE547    | Russia     | Russia_BronzeAge_Yamnaya     | 46.54 | 43.7  | 4710.5  | 0.686466601000000 | X<br>Y | 1.2_Steppe_5000BP_4300BP   |
| Yamnaya | RISE548    | Russia     | Russia_BronzeAge_Yamnaya     | 46.54 | 43.7  | 4850.0  | 0.910878358000000 | X<br>Y | 1.2_Steppe_5000BP_4300BP   |
| Yamnaya | RISE550    | Russia     | Russia_BronzeAge_Yamnaya     | 46.56 | 43.68 | 4934.5  | 0.440260727       | X<br>Y | 1.2_Steppe_5000BP_4300BP   |
| Yamnaya | RISE555    | Russia     | Russia_BronzeAge             | 48.72 | 44.5  | 4627.0  | 0.237337432       | X<br>Y | 1.2_Steppe_5000BP_4300BP   |
| Yamnaya | Yamnaya    | Kazakhstan | Kazakhstan_BronzeAge_Yamnaya | 49.13 | 75.85 | 4902.5  | 26.39165529       | X<br>Y | 1.2_Steppe_5000BP_4300BP   |
| Yamnaya | MJ-09      | Ukraine    | Ukraine_BronzeAge_Catacomb   | 47.43 | 34.27 | 4285.5  | 0.199475487000000 | X<br>X | 1.2_Steppe_5000BP_4300BP   |
| Yamnaya | MJ-06      | Ukraine    | Ukraine_BronzeAge_Yamnaya    | 49.32 | 35.37 | 4629.5  | 0.161999877       | X<br>X | 1.2_EuropeNE_4800BP_3000BP |
| Yamnaya | NEO175     | Russia     | Russia_Neolithic_Sredny      | 52.28 | 38.96 | 4607.0  | 0.416698274       | X<br>Y | 1.2_Steppe_5000BP_4300BP   |
| Yamnaya | Latvia_LN1 | Latvia     | Latvia_Neolithic_CWC         | 56.28 | 25.13 | 4833.0  | 0.197755635       | X<br>X | 1.2_EuropeNE_4800BP_3000BP |
| Yamnaya | RISE552    | Russia     | Russia_BronzeAge_Yamnaya     | 46.62 | 43.33 | 4446.0  | 2.458824579       | X<br>Y | 1.2_Steppe_5000BP_4300BP   |
| Yamnaya | RISE240    | Russia     | Russia_BronzeAge_Yamnaya     | 46.58 | 43.68 | 4706.0  | 0.173195772       | X<br>X | 1.2_Steppe_5000BP_4300BP   |

2272 **Table S3h.1. Metadata and grouping of ancient individuals into reference populations.**

2273

## 2274 References

2275 1. Lawson, D. J., Hellenthal, G., Myers, S. & Falush, D. Inference of population structure  
2276 using dense haplotype data. *PLoS Genet.* **8**, e1002453 (2012).

2277 2. Margaryan, A. *et al.* Population genomics of the Viking world. *Nature* **585**, 390–396  
2278 (2020).

- 2279 3. Hellenthal, G. *et al.* A genetic atlas of human admixture history. *Science* **343**, 747–  
2280 751 (2014).
- 2281 4. Bycroft, C. *et al.* The UK Biobank resource with deep phenotyping and genomic data.  
2282 *Nature* **562**, 203–209 (2018).
- 2283 5. Li, N. & Stephens, M. Modeling linkage disequilibrium and identifying recombination  
2284 hotspots using single-nucleotide polymorphism data. *Genetics* **165**, 2213–2233 (2003).
- 2285 6. Sarmanova, A., Morris, T. & Lawson, D. J. Population stratification in GWAS meta-  
2286 analysis should be standardized to the best available reference datasets. *bioRxiv*  
2287 2020.09.03.281568 (2020) doi:10.1101/2020.09.03.281568.
- 2288 7. Galinsky, K. J., Loh, P.-R., Mallick, S., Patterson, N. J. & Price, A. L. Population  
2289 Structure of UK Biobank and Ancient Eurasians Reveals Adaptation at Genes  
2290 Influencing Blood Pressure. *Am. J. Hum. Genet.* **99**, 1130–1139 (2016).
- 2291 8. Patterson, N. *et al.* Large-scale migration into Britain during the Middle to Late  
2292 Bronze Age. *Nature* (2021) doi:10.1038/s41586-021-04287-4.
- 2293 9. Sikora, M. *et al.* The population history of northeastern Siberia since the Pleistocene.  
2294 *Nature* **570**, 182–188 (2019).
- 2295 10. Shinde, V. *et al.* An Ancient Harappan Genome Lacks Ancestry from Steppe  
2296 Pastoralists or Iranian Farmers. *Cell* **179**, 729–735.e10 (2019).
- 2297 11. Hofmanová, Z. *et al.* Early farmers from across Europe directly descended  
2298 from Neolithic Aegeans. *Proc. Natl. Acad. Sci. U. S. A.* **113**, 6886–6891 (2016).
- 2299 12. Feldman, M. *et al.* Late Pleistocene human genome suggests a local origin for  
2300 the first farmers of central Anatolia. *Nat. Commun.* **10**, 1218 (2019).
- 2301 13. Pedregosa, F. *et al.* Scikit-learn: Machine learning in Python. *J. Mach. Learn.*  
2302 *Res.* **12**, 2825–2830 (2011).
- 2303 14. Virtanen, P. *et al.* SciPy 1.0: fundamental algorithms for scientific computing  
2304 in Python. *Nat. Methods* **17**, 261–272 (2020).

2305

2306

2307 3i) Building a population history model of Europeans and using  
2308 it to assign local ancestry to all haplotypes in modern and  
2309 ancient European samples

2310

2311

Alice Pearson<sup>1</sup>, Richard Durbin<sup>1,2</sup>

2312

2313

<sup>1</sup>Department of Genetics, University of Cambridge, UK.

2314

<sup>2</sup>Wellcome Sanger Institute, Wellcome Genome Campus, UK.

2315

2316 Introduction

2317

We built a quantitative admixture graph model that represents the major ancestry flows

2318

contributing to modern European genomes over the last 50,000 years. Within this model we

2319

placed chromosome sampling points from appropriate populations and times that resemble

2320

European and West Asian samples from the imputed present aDNA dataset. Based on the

2321

model, we developed an approach using genealogical nearest neighbours <sup>1</sup> in tree

2322

sequences inferred using the Relate program <sup>2</sup> to estimate the path backwards in time

2323

through the population structure taken by each modern and ancient haplotype at each

2324

position in the genome. Throughout we evaluate our methods by comparing results from the

2325

real data to those from simulations of the model.

2326 Method and Results

2327 Model of population structure

2328

We first filtered the present aDNA dataset to include 1015 ancient genomes most relevant to

2329

modern European genetic history. This included samples that have a West Eurasian

2330

archeological location and lying on EHG-WHG-CHG-Farmer clines in Principle Component

2331

Analysis and excluded very old West Eurasian samples and archaics. These were merged

2332

with all 503 present-day European 1000 Genomes Project samples to make up our dataset,

2333

totalling 1518 diploid samples. Figure **S3i.1** shows a schematic of our model that describes

2334

the evolution of population structure in Europe during the last 50 ky. We used parameters

2335

subjectively estimated from Principal Component Analysis and Jones *et al.* <sup>3</sup>, and

2336

constructed a simulator for this model in msprime (a coalescent simulator) <sup>4</sup>. Shortly after

2337 the expansion of anatomically modern humans into Eurasia there is an early population split  
2338 45 kya between the Northern Europeans (NE) who continued travelling north west into  
2339 Europe and West Asians (WA) who stayed more locally in the Levant and South Caucasus  
2340 area. The WA population then splits to form the Caucasus Hunter-Gatherers (CHGs) and the  
2341 Anatolian Farmers (Ana) 24kya. 18kya the Western Hunter-Gatherers (WHGs) and Eastern  
2342 Hunter-Gatherers (EHGs) begin to diverge within the NE. At that point, the four genetic  
2343 strands that make up present day European ancestry are distinct in our model and  
2344 subsequently admixture between these components describes the formation of modern  
2345 European gene pool; we show the formation of the Neolithic Farmers (Neo) from admixture  
2346 between WHGs and the Ana 6kya, the formation of the Yamnaya Steppe people (Yam) from  
2347 admixture of EHG and CHGs during the early Bronze Age 5.4 kya and finally the formation  
2348 of the Bronze Age gene pool 4.2kya as a two-way mix between the Yam and the Neo. From  
2349 the Bronze Age up to present-day, there is simply exponential growth in population size.

2350 The sampling distribution in the model is based on the numbers and average ages of sample  
2351 groups in the present aDNA data set, where Iron Age, Viking and Late Antiquity samples  
2352 younger than 2500 years BP are grouped with the present day genomes and those older are  
2353 grouped with Bronze Age samples.

2354

#### 2355 Local Ancestry Using Tree Sequences:

2356 In the absence of recombination, a set of sample chromosomes from different genomes are  
2357 related to each other by a single tree, identifiable by the sharing of derived mutations. A  
2358 recombination event between any two chromosomes changes the tree topology. As you  
2359 move from one end of the sample chromosomes to the other, a sequence of changing trees  
2360 is observed, each encoding the genealogy of a segment of DNA (sample haplotypes) and  
2361 each tree change reflecting one or more recombination events. The Relate software <sup>2</sup> aims  
2362 to infer the true underlying tree sequence from genotype data. We worked with three types of  
2363 tree sequence data; tree sequences simulated directly from the model using msprime (model  
2364 simulated), tree sequences inferred by Relate from genotype data simulated from the model  
2365 (Relate simulated) and tree sequences inferred by Relate from the real genotype data  
2366 (Relate MesoNeo).

2367 With ancient samples and admixture events, the first coalescence alone is insufficient for  
2368 understanding the full ancestry of a given haplotype. This is because the first coalescence  
2369 event may occur at a time younger than the age of some sampled groups, in which case the  
2370 older sampled individuals could not be found as the closest relatives and therefore the true  
2371 local ancestry of haplotypes may not be correctly established. Similarly, with some sampled  
2372 populations formed via admixture of other sampled populations, the closest relatives to a  
2373 haplotype may by chance be from the admixed population alone even if the age of first  
2374 coalescence is old enough to capture all sampled groups, in which case again the true local  
2375 ancestry of a haplotype may not be found. The path that a haplotype takes backwards in  
2376 time from the present day to the root of the model is more informative about its local ancestry  
2377 as its relationship to all relevant historical and admixing populations is established. If we  
2378 assume an infinite-sites model, all alleles only appear once in history by mutation and all  
2379 take a single path from the present day to the root.

2380 The method involves taking a focal haplotype and its marginal tree from the tree sequence  
2381 describing its genealogical relationship to all other sample haplotypes. From that haplotype  
2382 we traverse up the tree, jumping to successive parent nodes towards the root i.e parent,  
2383 grandparent, great-grandparent etc. We want to identify what population each of these nodes  
2384 (ancestors) occurs in, which in turn describes what path the haplotype has taken backwards  
2385 in time. In simulated tree sequences, we can simply obtain (using tskit) the population  
2386 identity of each node but in tree sequences inferred with Relate this is not possible. We  
2387 therefore adapted the concept of Genealogical Nearest Neighbours <sup>1</sup>. At each node we  
2388 record its age and the number of reference samples belonging to each ancestral group in the  
2389 leaves below that node as a proportion of all the reference samples in the leaves below that  
2390 node (not including the focal leaf itself or leaves seen at previously analysed nodes further  
2391 down the tree). I refer to the distribution of reference ancestry proportions and age at a node  
2392 as GNN<sub>x</sub> (Genealogical Nearest Neighbours at *x*) where *x* is the *x*th node examined towards  
2393 the root. The ordered collection of all GNN<sub>x</sub> distributions of all *x* nodes examined during a  
2394 tree traversal describes the population identity of each node and therefore the path that the  
2395 focal haplotype has taken to the root. The key is to consider the GNNs together, not  
2396 independently.

2397 We therefore first define the set of ancient reference samples from our dataset that are  
2398 genetically diagnostic of each of the 7 ancestral groups. These samples form tight clusters

2399 within broader ancestry clouds in the PCA. In order to assign paths to millions of sample  
 2400 lineages we implemented a supervised machine learning method using the Python Keras  
 2401 package with a TensorFlow backend <sup>5</sup>. The input to the network is the ordered collection of  
 2402 GNN distributions plus the node age for the first five informative nodes traversed towards the  
 2403 root from a single sample haplotype, configured as a 5 x 8 matrix. Informative nodes are  
 2404 those that have at least one leaf from the reference set of ancient samples. If we reach the  
 2405 root of the tree in less than five informative nodes, then the remaining rows of the matrix are  
 2406 filled with -15 as padding. The output of the network is a numerical label 0-6 characterising  
 2407 the path taken by the haplotype backwards in time. These paths can be seen clearly in  
 2408 Figure S3i.1 and are described in Table S3i.1. Given the sampling distribution, there is not  
 2409 always an informative node in the area of the model where the four ancestries are distinct,  
 2410 200-600 generations ago. Labels 5, 6 and 0 capture these situations where we have limited  
 2411 information to assign the full path and instead only a partial path or none at all.

| Path label | Populations of inheritance              |
|------------|-----------------------------------------|
| 0          | None can be determined                  |
| 1          | Neolithic Farmers/Anatolian/West Asian  |
| 2          | Yamnaya/CHG/West Asian                  |
| 3          | Neolithic Farmers/WHG/Northern European |
| 4          | Yamnaya/EHG/Northern European           |
| 5          | Northern European                       |
| 6          | West Asian                              |

2412 **Table S3i.1:** The populations that carried a haplotype through time by inheritance, ordered  
 2413 backwards in time that make up each path.

2414 A large amount of training data can be generated by simulation of tree sequences from the  
 2415 model. We simulated a tree sequence and corresponding VCF file of chromosome 3 and  
 2416 applied Relate to the VCF file to obtain a Relate simulated tree sequence. We then extracted  
 2417 GNN distributions, traversing from all Present-day, Bronze Age, Neo and Yam samples at  
 2418 evenly spaced trees from the Relate simulated tree sequence. Path labels at corresponding  
 2419 sites were extracted from the model simulated tree sequence. WHG, EHG, CHG, and Ana  
 2420 can be given paths 1-4 from their population identity alone and therefore are not involved in  
 2421 the network training. Our total training set consisted of 4,000,000 GNN matrices and labels.

2422 85% of true labels were full paths 1-4. The network was trained using a categorical cross-  
 2423 entropy function, Adam optimisation and a batch size of 30. Training took place over 30  
 2424 epochs. For testing we generated another Relate Simulated tree sequence and extracted  
 2425 1,000,000 Relate GNNs and simulated true labels. The network displayed 75% accuracy.  
 2426 Figure **S3i.B** is a confusion matrix comparing the classed labels to the true labels.

2427 Relate tree sequences were inferred for all chromosomes of our merged dataset, using a  
 2428 mutation rate of  $1.25 \times 10^{-8}$  per bp per generation and fine-scale human recombination maps.  
 2429 We assigned paths for all samples at every site using the trained network. We annotated the  
 2430 merged VCF files with the path assignments as a FORMAT tag with ID=AP standing for  
 2431 Ancestral Path.

2432 Admixture fractions for hybrid groups can be estimated from the local ancestry assignments  
 2433 as the proportion of sites taking each of the relevant paths out of all sites in all samples of a  
 2434 hybrid group. We calculated this genome-wide from the VCF files containing the new AP  
 2435 format tag. The results are shown in Figure **S3i.3**.

2436 Figures:

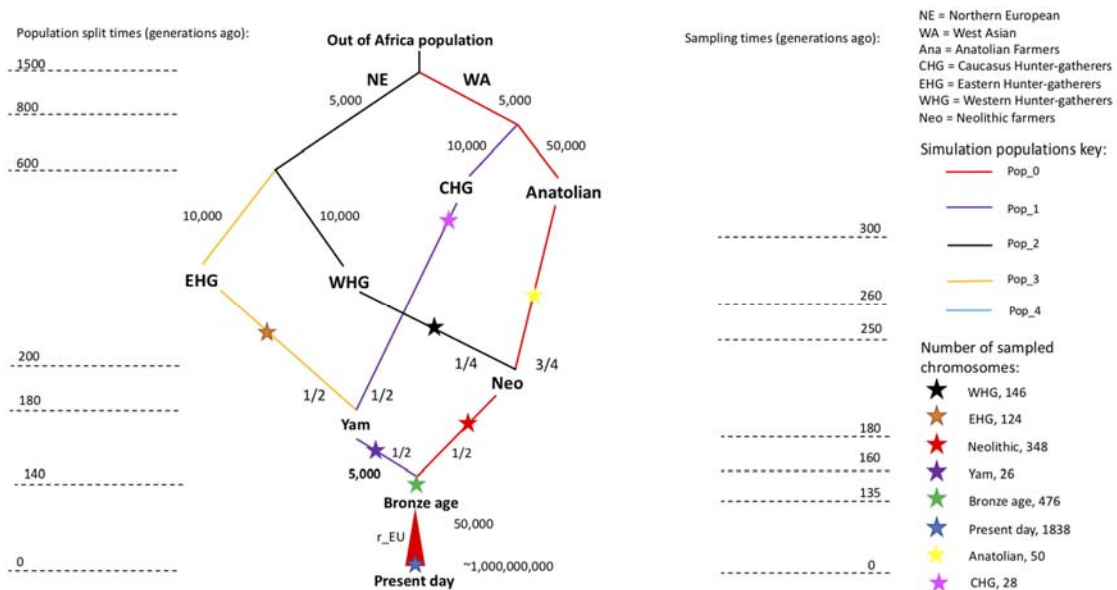

2437  
 2438  
 2439 **Figure S3i.1:** A schematic of the model of population structure in Europe that was built in  
 2440 msprime. Moving down the figure is forwards in time and the population split times and  
 2441 admixture times are given in generations ago. Coloured lines represent the four populations  
 2442 declared in the simulation that extend through time. Sampled populations and times are  
 2443 marked with a star and the number of chromosomes sampled is given in the key.

2444  
2445  
2446  
2447

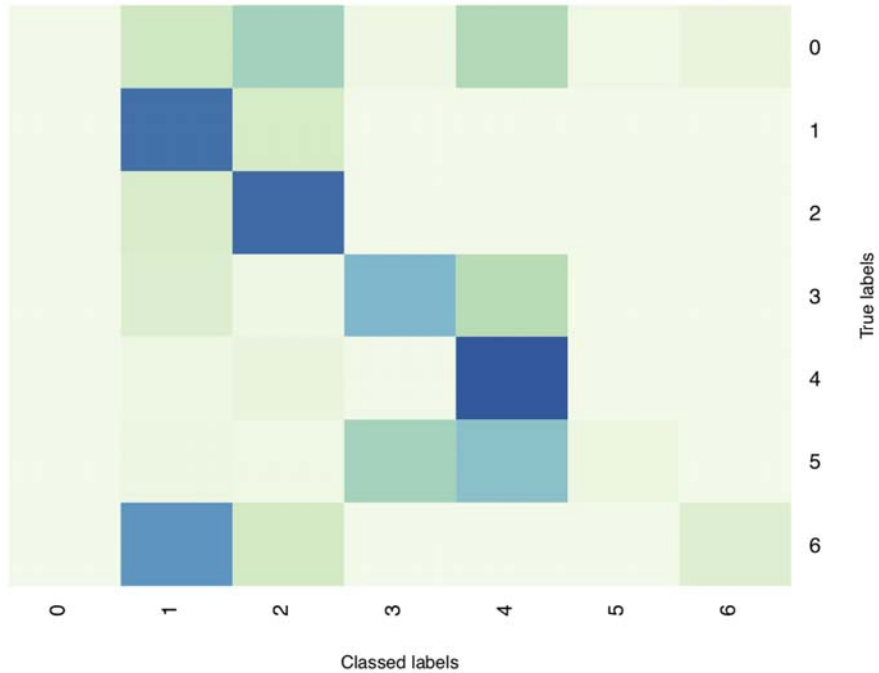

2448  
2449  
2450  
2451  
2452

**Figure S3i.2:** Heatmap of the confusion matrix between the true labels and classed labels for Relate simulated test data. This is normalised by the sum of rows i.e of the true labels, how many the classifier correctly predicted.



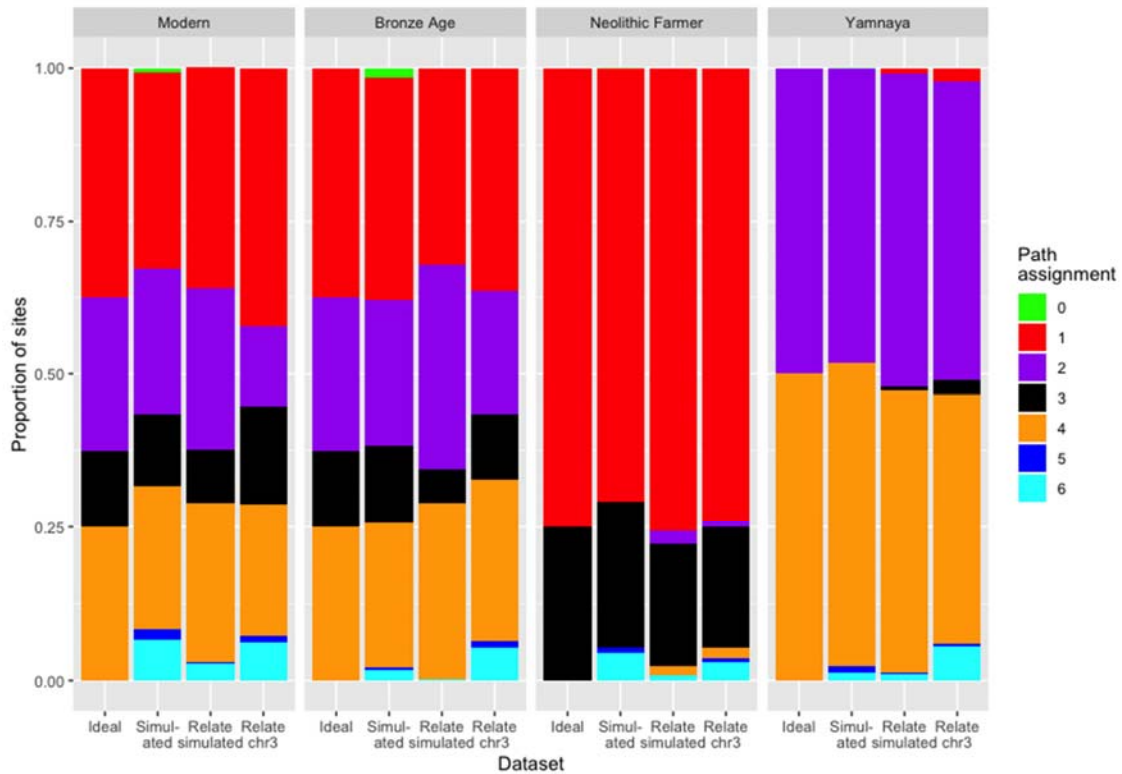

2453  
 2454  
 2455  
 2456  
 2457  
 2458  
 2459  
 2460  
 2461  
 2462  
 2463  
 2464  
 2465  
 2466  
 2467

**Figure S3i.3:** Admixture fractions displayed as bars divided by the proportion of all sites assigned each path 0-6. For each admixed population there are four bars from four different tree sequences: *Ideal* is our best guess at the admixture fractions given previously published results and shows the fractions we used as input in msprime simulation. *Simulated* are the proportions of sites assigned each path extracted from the msprime simulated tree sequences which we used to train the neural, therefore partial paths are included where the node distribution means full paths cannot be determined. *Relate simulated* are the proportions of sites classed as each path in a Relate tree sequence inferred from simulated data, when GNNs are extracted from this tree sequence and classified as paths by the neural network. *Relate chr3* are the proportions of sites classed as each path in a Relate tree sequence inferred from the real (ancient genomic) chromosome 3 data, when GNNs are extracted from this tree sequence and classified as paths by the neural network.

2468 **References**

2469 1. Kelleher, J. *et al.* Inferring whole-genome histories in large population datasets. *Nat.*  
 2470 *Genet.* **51**, 1330–1338 (2019).  
 2471 2. Speidel, L., Forest, M., Shi, S. & Myers, S. R. A method for genome-wide genealogy  
 2472 estimation for thousands of samples. *Nat. Genet.* **51**, 1321–1329 (2019).  
 2473 3. Jones, E. R. *et al.* Upper Palaeolithic genomes reveal deep roots of modern

- 2474 Eurasians. *Nat. Commun.* **6**, 1–8 (2015).
- 2475 4. Kelleher, J., Etheridge, A. M. & McVean, G. Efficient Coalescent Simulation and  
2476 Genealogical Analysis for Large Sample Sizes. *PLoS Comput. Biol.* **12**, e1004842  
2477 (2016).
- 2478 5. Chollet, F. *et al.* Keras. <https://keras.io> (2015).

## 4) Natural selection and trait evolution

2479

2480

### 4a) Estimating allele frequency trajectories of trait-associated variants

2481

2482

2483 Evan K. Irving-Pease<sup>1</sup>, Aaron J. Stern<sup>2</sup>, Rasmus Nielsen<sup>1,2</sup>, Fernando Racimo<sup>1</sup>

2484

2485 <sup>1</sup>Lundbeck Foundation GeoGenetics Centre, GLOBE Institute, University of Copenhagen,  
2486 Copenhagen, Denmark

2487

<sup>2</sup>Department of Integrative Biology, University of California, Berkeley

2488

#### 2489 Introduction

2490 Genome-wide association studies (GWAS) of present-day human populations have identified  
2491 large numbers of genetic variants associated with complex traits. However, the extent to  
2492 which these variants have been under positive selection during recent human evolution is  
2493 unclear. We aimed to model the allele frequency trajectories and selection coefficients of  
2494 GWAS variants through time, using genomic data from both present-day populations and  
2495 ancient individuals sampled across West Eurasia during the Holocene. We used the software  
2496 *CLUES*<sup>1</sup>, which supports inference of allele frequency trajectories from marginal trees  
2497 sampled from a reconstruction of the ancestral recombination graph (ARG)<sup>2</sup> for a set of  
2498 genomic sequences, in combination with genotype likelihoods from serially sampled ancient  
2499 DNA (aDNA).

2500

2501 To account for population structure in our samples, we applied a novel chromosome painting  
2502 technique ([Supplementary Note S3i](#)). This technique is based on inference of a sample's  
2503 nearest neighbours in the marginal trees of an ARG that contains labelled individuals. In our  
2504 case, the labelling corresponds to ancestral populations that predate the main episodes of  
2505 admixture in West Eurasia ([Supplementary Note S3i](#)). This method allows us to accurately  
2506 assign ancestral population labels to haplotypes found in both ancient and present-day  
2507 individuals. By conditioning our selection analyses on these haplotype backgrounds, we can  
2508 infer the selection trajectories of GWAS risk alleles in a manner that is approximately  
2509 invariant to change in the admixture proportions through time. These ancestry specific allele  
2510 trajectories reveal many novel aspects about the dynamic interplay between selection and  
2511 admixture in West Eurasia throughout the Holocene.

## 2512 Methods

2513 The computational pipeline to perform all analyses was written in the `snakemake` workflow  
2514 management system <sup>3</sup>. For a full list of all the software and versions used, see [Table S4a.1](#).  
2515 The directed acyclic graph (DAG) of the computational pipeline is shown in [Figure S4a.1](#). All  
2516 pipeline code, custom scripts and a `conda` environment to replicate the analyses are  
2517 available in the GitHub repository ([https://github.com/ekirving/mesoneo\\_paper](https://github.com/ekirving/mesoneo_paper)).

## 2518 SNP Ascertainment

### 2519 GWAS SNPs

2520 We ascertained -a list of GWAS targets by downloading version v1.0.2 (2020-06-04) of the  
2521 NHGRI-EBI GWAS Catalog <sup>4</sup>; containing 187,403 GWAS associations for 3,735 traits. To  
2522 account for the varying significance thresholds used in the 4,007 published studies included  
2523 in the catalogue, we restricted our analysis to SNPs with a genome-wide significance  
2524 threshold of  $p < 5e-8$ . We further filtered the catalogue to retain only single-nucleotide  
2525 polymorphisms (SNPs) with a valid dbSNP Reference SNP identifier (rsID); resulting in  
2526 121,795 GWAS associations for 70,224 rsIDs. For each of the retained associations, we  
2527 retrieved the trait ontology hierarchy by querying the EMBL-EBI Ontology Lookup Service <sup>5</sup>.  
2528 We then queried the Ensembl REST API <sup>6</sup>, to retrieve metadata about each rsID; including  
2529 chromosome and position in the GRCh37 assembly, ancestral allele, and nearest genes.

### 2530 Control SNPs

2531 To determine the extent to which GWAS variants are enriched for selection, we paired each  
2532 GWAS SNP with a unique “Control SNP”. Control SNPs were ascertained by selecting all  
2533 biallelic SNPs within the imputed dataset ([Supplementary Note 2](#)) and excluding any that fell  
2534 within +/- 50 kb of a GWAS SNP or a gene region. Gene annotations for GRCh37 were  
2535 downloaded from Ensembl (release 87) <sup>7</sup>. Control SNPs were grouped into bins based on  
2536 their derived allele frequency (DAF), rounded to the nearest 1%, and paired randomly  
2537 (without replacement) with GWAS SNPs in the same chromosome and DAF bin.

### 2538 Simulated Neutral SNPs

2539 To measure the effects of demography on the modelled allele frequency trajectories, we  
2540 frequency paired GWAS SNPs with neutral SNPs, simulated under the demography used to  
2541 train the chromosome painting model ([Supplementary Note 3i](#)). Neutral simulations were  
2542 performed with *msprime* <sup>8</sup>, for genomes of length 198 Mbp (i.e., the approximate length of  
2543 chr3), with sample sizes and ages broadly equivalent to those in the empirical aDNA dataset.

2544

## 2545 1000G ARG

2546 We built genome-wide genealogies for all samples in the 1000 Genomes Project (1000G)  
2547 Phase 3 release <sup>9</sup> using the software *Relate* (1.1.3) <sup>2</sup>.

## 2548 Data pre-processing

2549 Prior to inference of the ARG, we converted VCF files into HAPS format, removed all non-  
2550 biallelic SNPs, polarised SNPs against the ancestral allele calls from the Ensembl Compara  
2551 71 database (ens-staging2:3306) <sup>10</sup>, filtered sites using the 1000 Genomes StrictMask  
2552 (20140520) and generated SNP annotations using *Relate*.

## 2553 ARG Inference

2554 We jointly inferred genome-wide genealogies for all 1000G Phase 3 samples, using *Relate*,  
2555 assuming a mutation rate of 1.25e-8 and an Ne of 30,000. From this ARG, we extracted  
2556 subtrees containing samples belonging to three European (EUR) populations: (i) Finnish in  
2557 Finland (FIN); (ii) British in England and Scotland (GBR); and (iii) Toscani in Italia (TSI). We  
2558 used these subtrees to jointly reinfer branch lengths and to infer a population size history for  
2559 the EUR metapopulation. Lastly, we remapped all SNPs which had been pruned during  
2560 inference of the ARG onto the branch-length calibrated EUR subtrees.

## 2561 Modifications to CLUES

2562 Here we describe several modifications made to *CLUES* (see the GitHub wiki page for more  
2563 information <https://github.com/35ajstern/clues/wiki>).

2564

## 2565 ARG sampling using Relate

2566 Instead of sampling ARGs using *ARGweaver* <sup>11</sup>, we sample ARGs using *Relate* <sup>2</sup> for  
2567 scalability reasons. *Relate* differs from *ARGweaver* in that it assumes a continuous-time  
2568 coalescent process (vs discrete-time for *ARGweaver*); hence we modified the hidden Markov  
2569 model (HMM) used by *CLUES* to (1) take time steps every generation, vs over a smaller  
2570 number (~10-50) of timesteps; and (2) within time steps, the probability density of  
2571 coalescence is calculated using the approach of <sup>12</sup> and <sup>13</sup>, vs the discrete-time lines-of-  
2572 descent approach used in <sup>11</sup> and <sup>1</sup>.

2573

## 2574 Ancient DNA samples

2575 We also introduced a new feature that allows the user to specify a time series of ancient  
2576 genotype likelihoods which are incorporated into the HMM. We incorporate these samples  
2577 by, for a given timestep  $t$ , including (i.e. multiplying by) a Binomial( $n=2$ ,  $p=X_t$ ) emission  
2578 probability for each ancient sampled during timestep  $t$  in the HMM, where  $X_t$  is the latent  
2579 allele frequency during timestep  $t$ . In this particular application, we supplanted genotype  
2580 likelihoods with genotype posterior probabilities (which should be identical under a uniform  
2581 prior); we confirmed through tests that this did not yield any systematic biases.

## 2582 Selection Analysis

### 2583 CLUES with Modern 1000G data

2584 For each modelled SNP, we used `Relate` to draw 100 samples from the MCMC posterior  
2585 distribution of trees at that locus. Trees were sampled assuming a mutation rate of  $1.25e-8$   
2586 <sup>2,14</sup> and using the population size history from the EUR calibrated subtrees.

2587

2588 We ran `CLUES` to infer allele frequency trajectories and selection coefficients from modern  
2589 1000G data, using: (i) the 100 sampled trees from `Relate` (`--times`); (ii) the inferred EUR  
2590 population size history (`--coal`); (iii) with trajectories polarised the by the derived allele (`--`  
2591 `A1`); (iv) a terminal frequency equal to the DAF of each SNP in EUR (`--popFreq`); and (v)  
2592 constrained selection to a single epoch spanning the last 15,000 years (`--timeBins`).

2593

2594 We ran these models for all GWAS and Control SNPs present in the imputed dataset for  
2595 which `Relate` was able to confidently map a mutation to the inferred trees ( $n=73,232$ ).

### 2596 CLUES with aDNA Time Series

2597 We also ran `CLUES` in an alternative mode, excluding the modern ARG data, and replacing  
2598 them with aDNA time series data, using: (i) the time series of aDNA genotype probabilities (`-`  
2599 `-ancientSamps`) (ii) the inferred EUR population size history (`--coal`); (iii) a terminal  
2600 frequency equal to the DAF of each SNP in EUR (`--popFreq`); and (iv) constraining  
2601 selection to a single epoch spanning the last 15,000 years (`--timeBins`).

2602

2603 We ran these models for all GWAS and Control SNPs present in the imputed dataset,  
2604 irrespective of their mappability in the `Relate` analyses ( $n=73,988$ ), as well as for all  
2605 Simulated SNPs ( $n=11,665$ ).

2606 CLUES with aDNA Ancestral Paintings

2607 We also ran four additional models for each GWAS and Control SNP, in which we  
2608 conditioned the time series of aDNA genotype probabilities on one of four specific ancestral  
2609 haplotype pathways (Supplementary Note S3i):

2610

- 2611 1. ANA (Anatolian Farmers -> Neolithic)
- 2612 2. CHG (Caucasus Hunter-gatherers -> Yamnaya)
- 2613 3. WHG (Western Hunter-gatherers -> Neolithic)
- 2614 4. EHG (Eastern Hunter-gatherers -> Yamnaya)

2615

2616 In a minority of cases, the chromosome painting model assigned a haplotype to one of two  
2617 basal pathways: (i) North European ancestry (WHG and EHG); and (ii) West Asian ancestry  
2618 (CHG and ANA). In such cases, we included these haplotypes in the conditional analyses for  
2619 both downstream pathways.

2620

2621 All other particulars of these models were identical to the earlier aDNA analyses, except that  
2622 genotypes were passed to *CLUES* in haploid mode (`--ancientHaps`), even when both  
2623 haplotypes in an individual shared the same painting.

2624

2625 For the simulated SNPs, we ran these analyses on two different datasets: (i) a simulation  
2626 labelled with the true pathways of each haplotype; and (ii) a simulation in which the pathways  
2627 were inferred by the chromosome painting model.

2628

2629 Reference and mapping bias filters

2630 To address issues of mapping biases that may cause artifactual changes in allele frequency  
2631 at individual sites, we also constructed a causal model for distinguishing direct effects of age  
2632 on allele frequency from indirect effects mediated by read depth, read length, and/or error  
2633 rates (Supplementary Note S4b). We then filtered out SNPs in which more than half of the  
2634 signal for temporal allele frequency change was driven by non-biological artefacts ( $0.5 \geq F_j <$   
2635  $1.0$ ). Furthermore, we implemented an additional mapping bias test, in which we compared  
2636 the inferred present-day frequency of all SNPs based on (i) a *CLUES* model of the aDNA  
2637 time-series data which was conditioned on the present-day frequency of each variant in the  
2638 three EUR populations (see above); and (ii) a simpler *CLUES* model containing the aDNA  
2639 time-series data alone. We then filtered out all SNPs in which the addition of the modern  
2640 data both increased the significance of the selection test and resulted in an absolute present-

2641 day frequency difference of > 0.1 between the two models. We also filtered out SNPs in  
2642 which the observed pattern of genotypes in modern individuals was inconsistent with the  
2643 marginal trees inferred from the surrounding haplotypes, as determined by `Relate`<sup>2</sup>.

#### 2644 Genome-wide selection

2645 We aggregated the results of all *CLUES* models (n=73,988) and converted the likelihood-  
2646 ratio scores into p-values, using the chi-squared distribution with one degree of freedom. To  
2647 identify genome-wide selection peaks, we used *harvester* (0.1)<sup>15</sup> with a relaxed input filter (`-`  
2648 `inlimit 1e-3`) and a minimum peak height equal to the Bonferroni corrected p-value  
2649 threshold (`-peak-limit 5.87`) for the number of tests in each grouping, after firstly  
2650 applying a positional correction for the sparseness of the SNP ascertainment (because the  
2651 published GWAS SNPs had already been pruned for linkage disequilibrium in their original  
2652 studies). We then merged any adjacent peaks that were less than 100 kb apart in the same  
2653 chromosome.

2654

2655 We also obtained a list of putatively selected SNPs and their p-values, inferred in an earlier  
2656 aDNA study<sup>16</sup>. To ascertain novel sweep loci in our study, we used *harvester* to infer  
2657 peaks from the published p-values. Additionally, we used *CLUES* to infer new p-values for all  
2658 genome-wide significant SNPs (p<5e-8; n=381) from the earlier study<sup>16</sup>, as not all SNPs  
2659 found to be significant in that study were present in our GWAS/Control ascertainment.

2660

2661 **Table S4a.1.** Software and versions used in the allele trajectory pipeline

| Software  | Version | URL                                                                                                                   | Reference |
|-----------|---------|-----------------------------------------------------------------------------------------------------------------------|-----------|
| bcftools  | 1.10.2  | <a href="https://github.com/samtools/bcftools">https://github.com/samtools/bcftools</a>                               | 17        |
| bedtools  | 2.29.2  | <a href="https://github.com/arg5x/bedtools2">https://github.com/arg5x/bedtools2</a>                                   | 18        |
| biopython | 1.76    | <a href="https://github.com/biopython/biopython">https://github.com/biopython/biopython</a>                           | 19        |
| clues     | 36cb7de | <a href="https://github.com/35ajstern/clues">https://github.com/35ajstern/clues</a>                                   | 1         |
| conda     | 4.9.0   | <a href="https://github.com/conda/conda">https://github.com/conda/conda</a>                                           | 20        |
| harvester | 0.1     | <a href="https://genomics.ut.ee/en/tools/manhattan-harvester">https://genomics.ut.ee/en/tools/manhattan-harvester</a> | 15        |
| msprime   |         | <a href="https://github.com/tskit-dev/msprime">https://github.com/tskit-dev/msprime</a>                               | 8         |
| numpy     | 1.17.0  | <a href="https://github.com/numpy/numpy">https://github.com/numpy/numpy</a>                                           | 21        |
| pandas    | 1.0.4   | <a href="https://github.com/pandas-dev/pandas">https://github.com/pandas-dev/pandas</a>                               | 22        |



|           |         |                                                                                                   |    |
|-----------|---------|---------------------------------------------------------------------------------------------------|----|
| pysam     | 0.15.3  | <a href="https://github.com/pysam-developers/pysam">https://github.com/pysam-developers/pysam</a> | 23 |
| python    | 3.6.7   | <a href="https://www.python.org">https://www.python.org</a>                                       | 24 |
| r-base    | 3.6.1   | <a href="https://www.r-project.org/">https://www.r-project.org/</a>                               | 25 |
| r-bedr    | 1.0.7   | <a href="https://github.com/cran/bedr">https://github.com/cran/bedr</a>                           | 26 |
| r-dplyr   | 0.8.0.1 | <a href="https://github.com/tidyverse/dplyr">https://github.com/tidyverse/dplyr</a>               | 27 |
| r-ggplot2 | 3.1.1   | <a href="https://github.com/tidyverse/ggplot2">https://github.com/tidyverse/ggplot2</a>           | 28 |
| r-ggrastr | 0.2.1   | <a href="https://github.com/VPetukhov/ggrastr">https://github.com/VPetukhov/ggrastr</a>           | 29 |
| r-ggrepel | 0.8.2   | <a href="https://github.com/slowkow/ggrepel">https://github.com/slowkow/ggrepel</a>               | 30 |
| r-ggribes | 0.5.1   | <a href="https://github.com/wilkelab/ggribes">https://github.com/wilkelab/ggribes</a>             | 31 |
| r-stringr | 1.4.0   | <a href="https://github.com/tidyverse/stringr">https://github.com/tidyverse/stringr</a>           | 32 |
| relate    | 1.1.3   | <a href="https://myersgroup.github.io/relate">https://myersgroup.github.io/relate</a>             | 2  |
| scipy     | 1.4.1   | <a href="https://github.com/scipy/scipy">https://github.com/scipy/scipy</a>                       | 33 |
| snakemake | 5.12.3  | <a href="https://github.com/snakemake/snakemake">https://github.com/snakemake/snakemake</a>       | 3  |

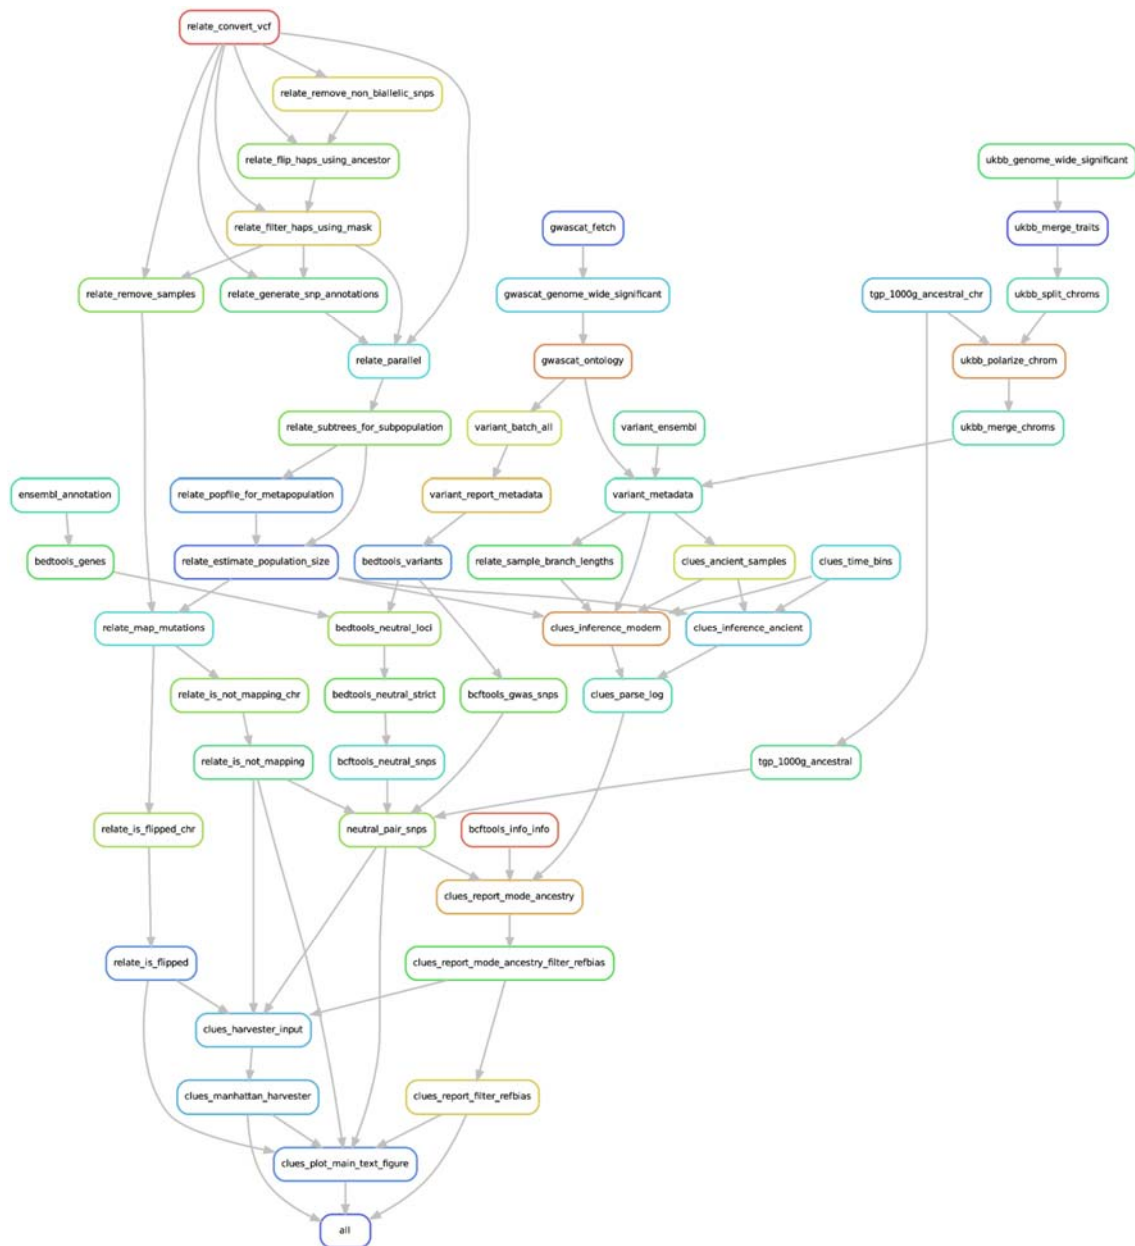

2663  
2664  
2665  
2666

**Figure S4a.1.** Directed acyclic graph (DAG) of the allele frequency trajectory analysis pipeline

## 2667 Results

2668 Selection in 1000G EUR

2669 *CLUES* analysis of all GWAS (n=35,592) and Control group SNPs (n=35,592) in the 1000G  
2670 Phase 3 populations FIN, GBR, and TSI identified zero genome-wide significant SNPs  
2671 ( $p < 5e-8$ ), and only one GWAS group SNP with a p-value below the Bonferroni corrected  
2672 significance threshold ( $p < 1.40e-6$ ) (see [Fig. S4a.2](#); Supplemental [Table XV](#)). Despite the

2673 overall lack of genome-wide significant SNPs, the GWAS group was significantly enriched for  
2674 evidence of selection when compared to the Control group (Wilcoxon signed-rank test, p-  
2675 value<2.2e-16).

2676

2677 The only significant SNP was rs1375131 (chr2:135954797), an intron variant in *ZRANB3*,  
2678 which is associated with mosquito bite size<sup>34</sup>. Non-significant SNPs within the surrounding  
2679 peak region include the lactase persistence SNP rs4988235 (*MCM6*; p=9.3e-6), which has  
2680 been widely reported as a target of strong selection in West Eurasians<sup>35,36</sup>. Among the  
2681 GWAS SNPs, there was limited evidence for non-significant selection peaks, with partial  
2682 overlap between these regions and those previously reported as genome-wide significant in  
2683 other studies. Among the Control SNPs, no evidence of selection was identified.

2684

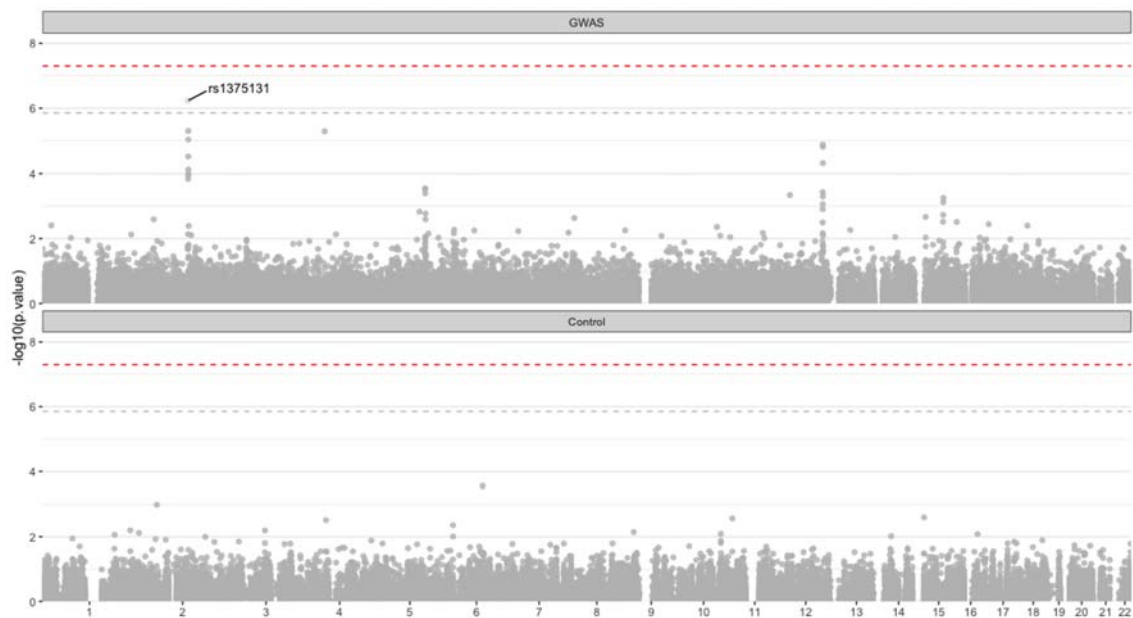

2685

2686 **Figure S4a.2.** Manhattan plot of the p-values from running CLUES on an ARG containing all samples  
2687 in FIN, GBR, and TSI from 1000G Phase 3, for (a) GWAS SNPs from the GWAS Catalog; and (b)  
2688 Control SNPs, frequency paired with the GWAS SNPs.

2689 Selection in aDNA Time Series

2690 *CLUES* analysis of all GWAS (n=33,323) and Control group SNPs (n=33,323) in the aDNA  
2691 time-series dataset identified 127 genome-wide significant SNPs (p<5e-8); 127 in the GWAS  
2692 group and 0 in the Control group. Using a Bonferroni corrected significance threshold, we  
2693 detected 207 significant SNPs (p < 1.50e-6); 202 in the GWAS group (97.6%) and 5 in the  
2694 Control group. Within the GWAS group, we identified 11 Bonferroni corrected significant  
2695 selection peaks (see [Fig. S4a.3](#); [Supplementary Table XVI](#)), of which 6 overlapped with

2696 those previously characterised in <sup>16</sup>. No significant selection peaks were detected in the  
2697 Control group.  
2698

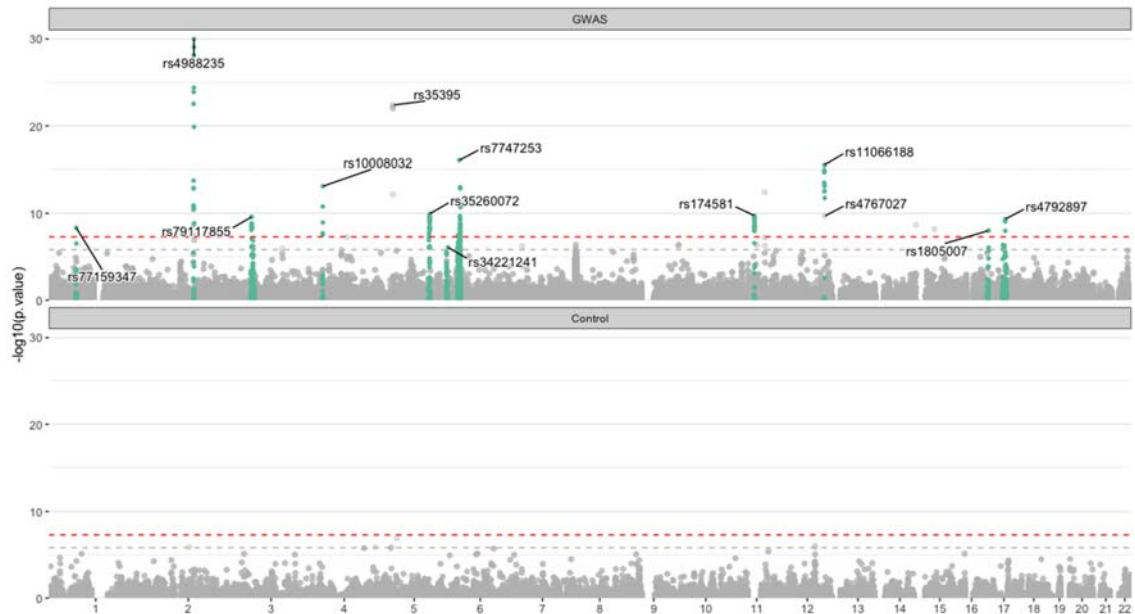

2699 **Figure S4a.3.** Manhattan plot of the p-values from running *CLUES* on an aDNA time series  
2700 from all West Eurasian samples in the imputed dataset, for (a) GWAS SNPs from the GWAS  
2701 Catalog; and (b) Control SNPs, frequency paired with the GWAS SNPs.  
2702  
2703  
2704

2705 Peak 1: LINC02797, AL583808.1

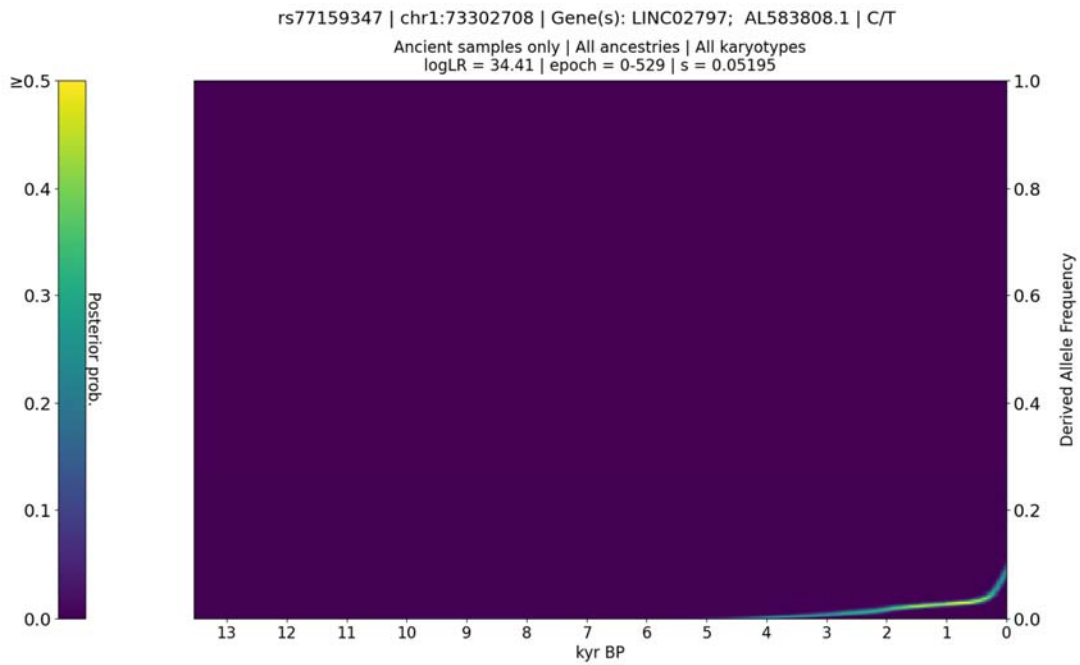

2706 T: Household income (MTAG) (PMID: 31844048)

2707 **Figure S4a.4.** CLUES plot of the aDNA time series analysis for all West Eurasian samples in  
2708 the imputed dataset, showing the posterior probability of the derived allele frequency  
2709 trajectory for rs77159347, the most significant SNP in the selection peak spanning  
2710 chr1:72480859-73978570.

2711 The first peak spanned the region chr1:72480859-73978570, with the most significant  
2712 SNP being rs77159347 (*LINC02797*, *AL583808.1*;  $p=4.48e-09$ ;  $s=0.052$ ), associated  
2713 with household income (MTAG)<sup>37</sup>.

2714

2715 Peak 2: MCM6

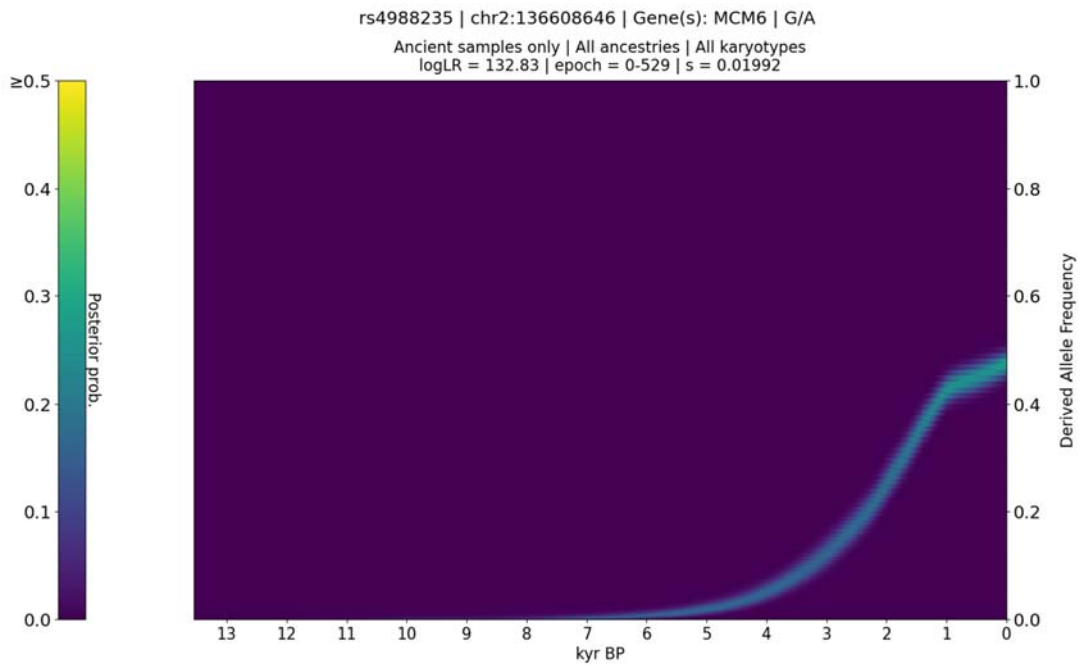

A: Blood protein levels (PMID: 29875488)  
A: Body mass index (PMID: 26426971)  
A: Hip circumference (PMID: 25673412)

G: Blood protein levels (PMID: 30072576)  
G: Body mass index (PMID: 30108127)

2716

2717 **Figure S4a.5.** CLUES plot of the aDNA time series analysis for all West Eurasian samples in  
2718 the imputed dataset, showing the posterior probability of the derived allele frequency  
2719 trajectory for rs4988235, the most significant SNP in the selection peak spanning  
2720 chr2:135407409-137512400.

2721 The second peak spanned the region chr2:135407409-137512400, with the most  
2722 significant SNP being rs4988235 (*MCM6*;  $p=9.86e-31$ ;  $s=0.0199$ ), associated with  
2723 lactase persistence; blood protein levels; body mass index; and hip circumference<sup>38–42</sup>.

2724

2725 Peak 3: PTH1R - AC109583.3

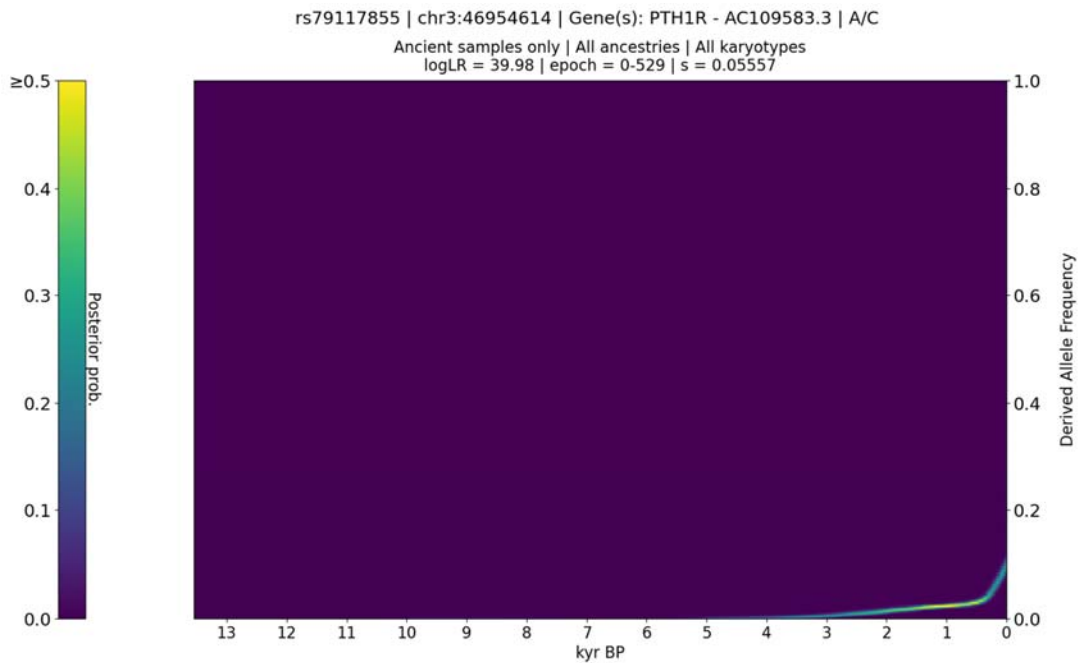

2726 ? : Blood protein levels (PMID: 28915241)

2727 **Figure S4a.6.** CLUES plot of the aDNA time series analysis for all West Eurasian samples in  
2728 the imputed dataset, showing the posterior probability of the derived allele frequency  
2729 trajectory for rs79117855, the most significant SNP in the selection peak spanning  
2730 chr3:44526639-53850000.

2731 The third peak spanned the region chr3:44526639-53850000, with the most significant SNP  
2732 being rs79117855 (*PTH1R* - AC109583.3;  $p=2.57e-10$ ;  $s=0.0556$ ), associated with blood  
2733 protein levels<sup>43</sup>.

2734

2735 Peak 4: KLF3 - RNA5SP158

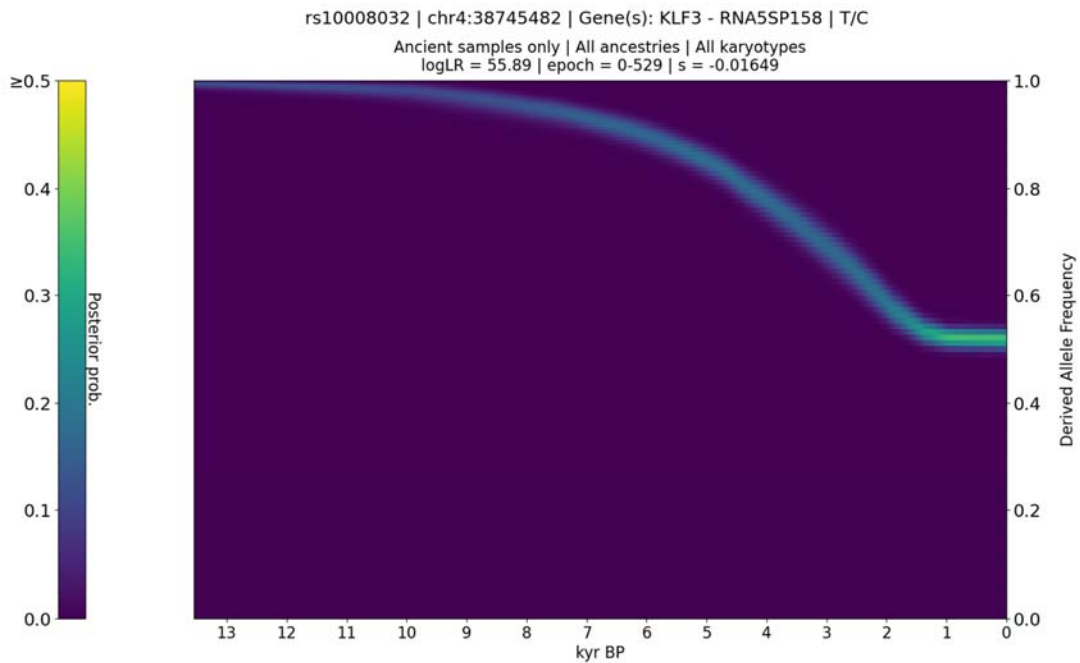

2736 ? : Allergic disease (asthma, hay fever or eczema) (PMID: 29785011)

2737 **Figure S4a.7.** CLUES plot of the aDNA time series analysis for all West Eurasian samples in  
2738 the imputed dataset, showing the posterior probability of the derived allele frequency  
2739 trajectory for rs10008032, the most significant SNP in the selection peak spanning  
2740 chr4:38593259-38815500.

2741 The fourth peak spanned the region chr4:38593259-38815500, with the most significant SNP  
2742 being rs10008032 (*KLF3 - RNA5SP158*;  $p=7.66e-14$ ;  $s=-0.0165$ ), associated with allergic  
2743 disease (asthma, hay fever or eczema) <sup>44</sup>.

2744



2745 Peak 5: P4HA2, SLC22A4

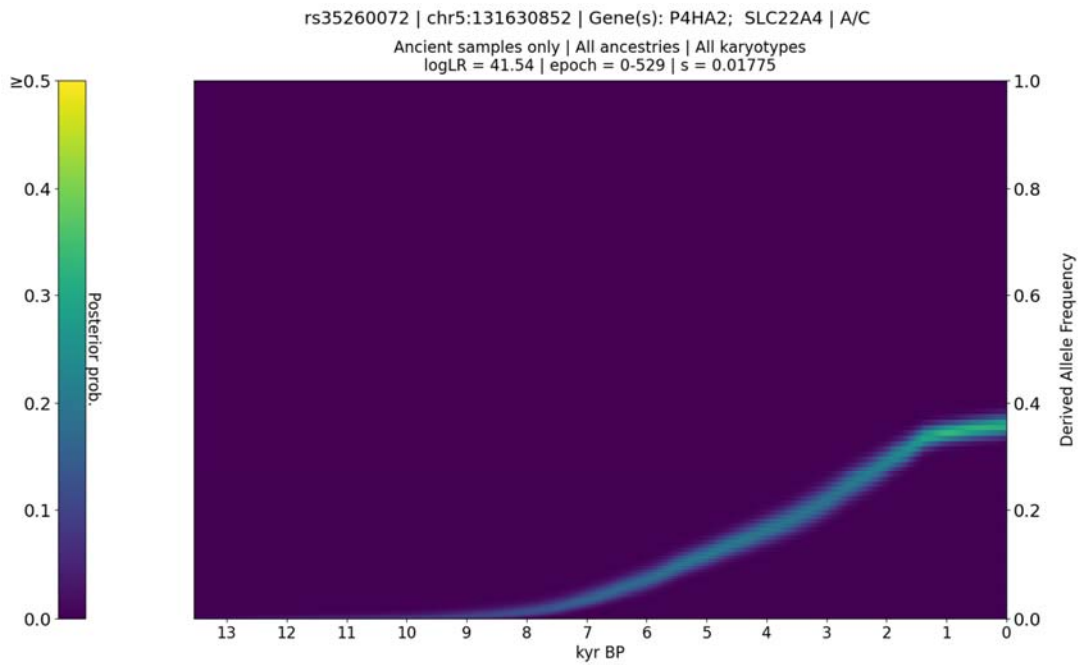

2746 C: Itch intensity from mosquito bite (PMID: 28199695)

2747 **Figure S4a.8.** CLUES plot of the aDNA time series analysis for all West Eurasian samples in  
2748 the imputed dataset, showing the posterior probability of the derived allele frequency  
2749 trajectory for rs35260072, the most significant SNP in the selection peak spanning  
2750 chr5:128016159-132349650.

2751 The fifth peak spanned the region chr5:128016159-132349650, with the most significant  
2752 SNP being rs35260072 (*P4HA2*, *SLC22A4*;  $p=1.15e-10$ ;  $s=0.0177$ ), associated with itch  
2753 intensity from mosquito bite<sup>34</sup>.

2754

2755 Peak 6: FLT4

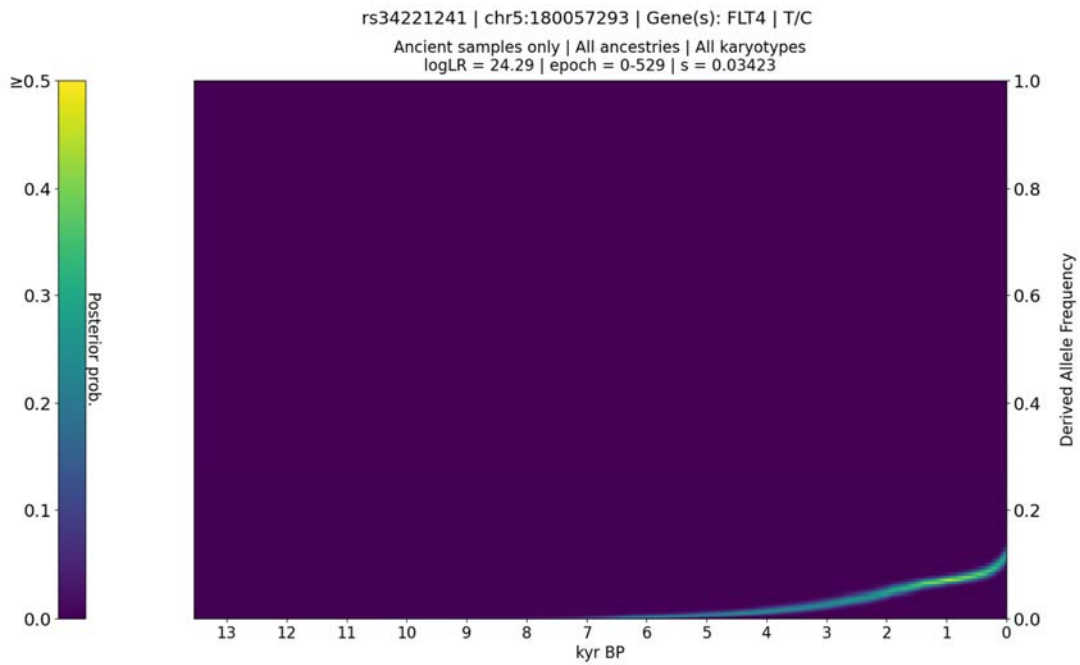

2756 C: Blood protein levels (PMID: 29875488)

2757 **Figure S4a.9.** CLUES plot of the aDNA time series analysis for all West Eurasian samples in  
2758 the imputed dataset, showing the posterior probability of the derived allele frequency  
2759 trajectory for rs34221241, the most significant SNP in the selection peak spanning  
2760 chr5:176653519-180661980.

2761 The sixth peak spanned the region chr5:176653519-180661980, with the most significant  
2762 SNP being rs34221241 (*FLT4*;  $p=8.29e-07$ ;  $s=0.0342$ ), associated with blood protein levels  
2763 <sup>40</sup>.

2764

2765 Peak 7: HLA-A - HLA-W

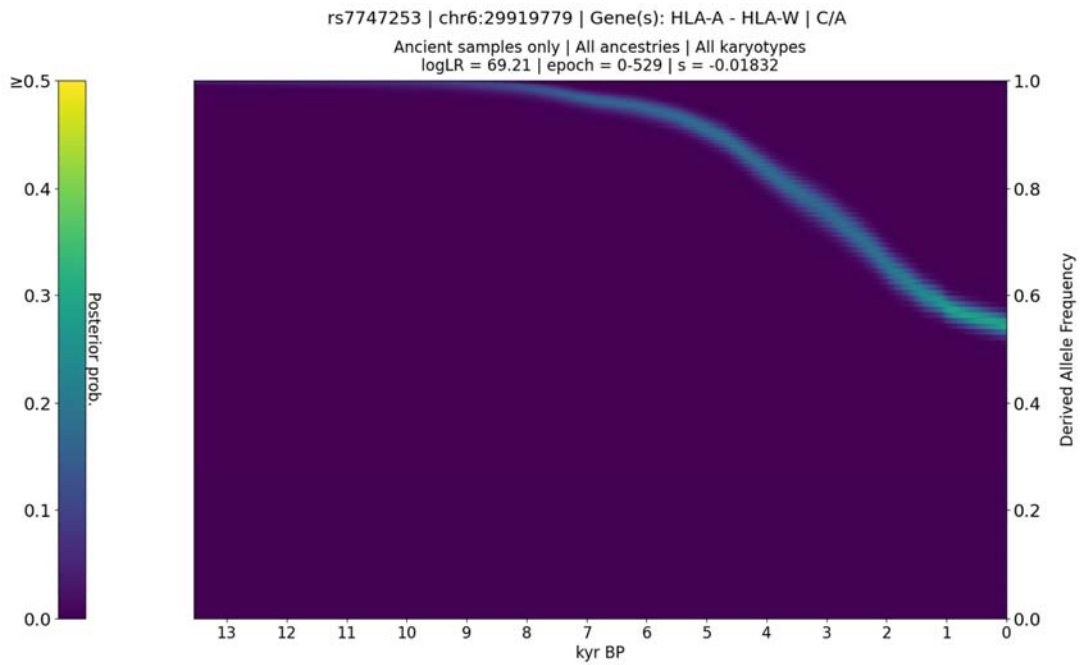

2766 C: Heel bone mineral density (PMID: 30598549)

2767 **Figure S4a.10.** CLUES plot of the aDNA time series analysis for all West Eurasian samples  
2768 in the imputed dataset, showing the posterior probability of the derived allele frequency  
2769 trajectory for rs7747253, the most significant SNP in the selection peak spanning  
2770 chr6:25236639-33535470.

2771 The seventh peak spanned the region chr6:25236639-33535470, with the most significant  
2772 SNP being rs7747253 (*HLA-A - HLA-W*;  $p=8.86e-17$ ;  $s=-0.0183$ ), associated with heel bone  
2773 mineral density<sup>45</sup>.

2774

2775 Peak 8: FADS2

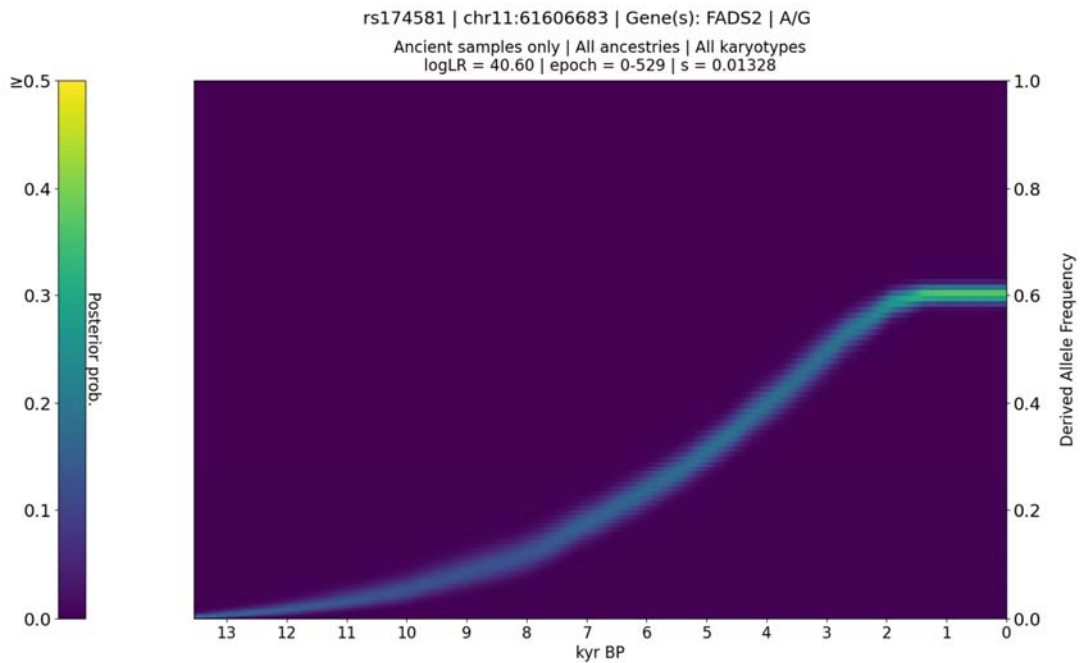

2776 A: Male-pattern baldness (PMID: 28196072)

A: Serum metabolite ratios in chronic kidney disease (PMID: 29545352)

2777 **Figure S4a.11.** CLUES plot of the aDNA time series analysis for all West Eurasian samples  
2778 in the imputed dataset, showing the posterior probability of the derived allele frequency  
2779 trajectory for rs174581, the most significant SNP in the selection peak spanning  
2780 chr11:61543499-61706010.

2781 The eighth peak spanned the region chr11:61543499-61706010, with the most significant  
2782 SNP being rs174581 (*FADS2*;  $p=1.87e-10$ ;  $s=0.0133$ ), associated with male-pattern  
2783 baldness; and serum metabolite ratios in chronic kidney disease <sup>46,47</sup>.

2784

2785 Peak 9: HECTD4

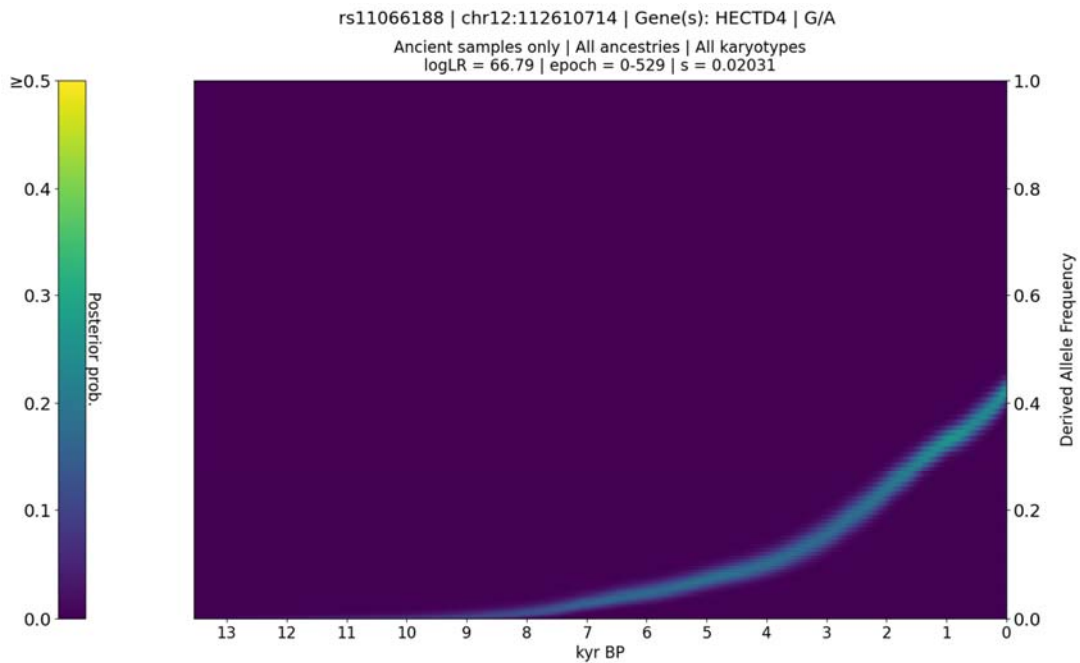

2786 ? : Celiac disease and Rheumatoid arthritis (PMID: 26546613)

2787 **Figure S4a.12.** CLUES plot of the aDNA time series analysis for all West Eurasian samples  
2788 in the imputed dataset, showing the posterior probability of the derived allele frequency  
2789 trajectory for rs11066188, the most significant SNP in the selection peak spanning  
2790 chr12:111833789-113137570.

2791 The ninth peak spanned the region chr12:111833789-113137570, with the most significant  
2792 SNP being rs11066188 (*HECTD4*;  $p=3.02e-16$ ;  $s=0.0203$ ), associated with celiac disease  
2793 and rheumatoid arthritis<sup>48</sup>.

2794

2795 Peak 10: AC092143.1, MC1R

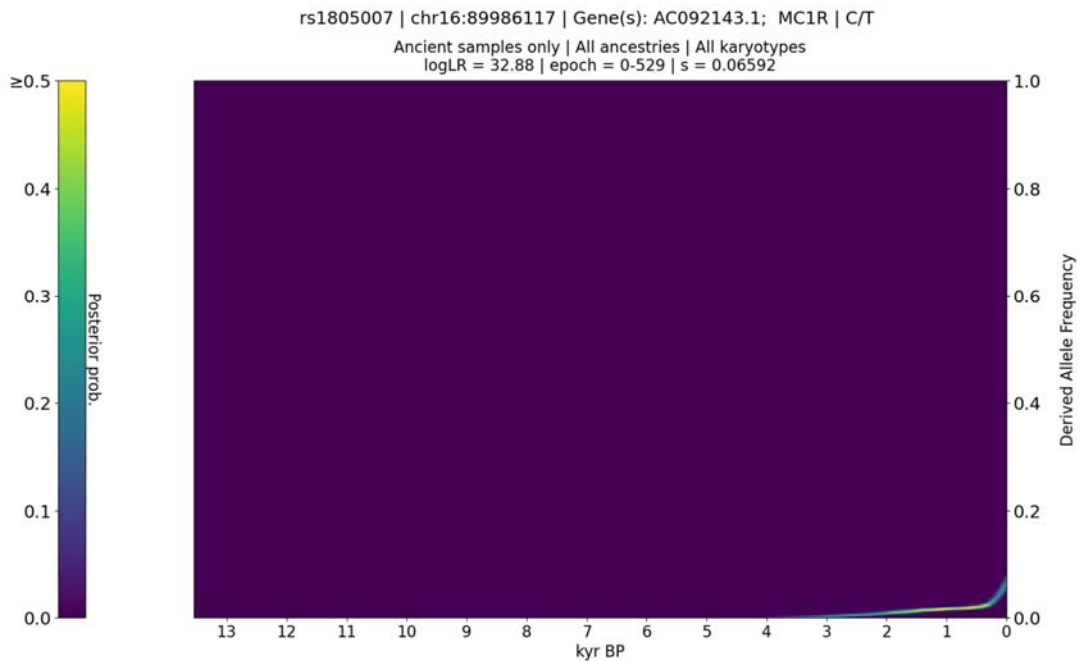

- ?: Balding type 1 (PMID: 30595370)
- ?: Hair morphology traits (PMID: 30166351)
- ?: Skin pigmentation traits (PMID: 30166351)
- A: Brown vs. black hair color (PMID: 30531825)
- C: Hair color (PMID: 23548203)
- C: Non-melanoma skin cancer (PMID: 23548203)
- C: Sunburns (PMID: 23548203)
- C: Tanning (PMID: 23548203)
- T: Basal cell carcinoma (PMID: 31174203; 27539887; 21700618)
- T: Blond vs. brown hair color (PMID: 17952075)
- T: Blond vs. brown/black hair color (PMID: 30531825)
- T: Cutaneous squamous cell carcinoma (PMID: 27424798)
- T: Freckles (PMID: 17952075)
- T: Hair color (PMID: 29662168)
- T: Keratinocyte cancer (MTAG) (PMID: 31174203)
- T: Melanoma (PMID: 28212542)
- T: Red vs non-red hair color (PMID: 17952075)
- T: Red vs. brown/black hair color (PMID: 30531825)
- T: Skin sensitivity to sun (PMID: 17952075)
- T: Squamous cell carcinoma (PMID: 31174203)

2796 **Figure S4a.13.** CLUES plot of the aDNA time series analysis for all West Eurasian samples  
 2797 in the imputed dataset, showing the posterior probability of the derived allele frequency  
 2798 trajectory for rs1805007, the most significant SNP in the selection peak spanning  
 2799 chr16:86009759-90084560.  
 2800

2801 The tenth peak spanned the region chr16:86009759-90084560, with the most significant  
 2802 SNP being rs1805007 (*AC092143.1*, *MC1R*;  $p=9.83e-09$ ;  $s=0.0659$ ), associated with balding  
 2803 type 1; basal cell carcinoma; blond vs. brown hair colour; blond vs. brown/black hair colour;  
 2804 brown vs. black hair colour; cutaneous squamous cell carcinoma; freckles; hair colour; hair  
 2805 morphology traits; keratinocyte cancer (MTAG); melanoma; non-melanoma skin cancer; red  
 2806 vs non-red hair colour; red vs. brown/black hair colour; skin pigmentation traits; skin  
 2807 sensitivity to sun; squamous cell carcinoma; sunburns; and tanning<sup>49–59</sup>.

2808

2809 Peak 11: MAPT

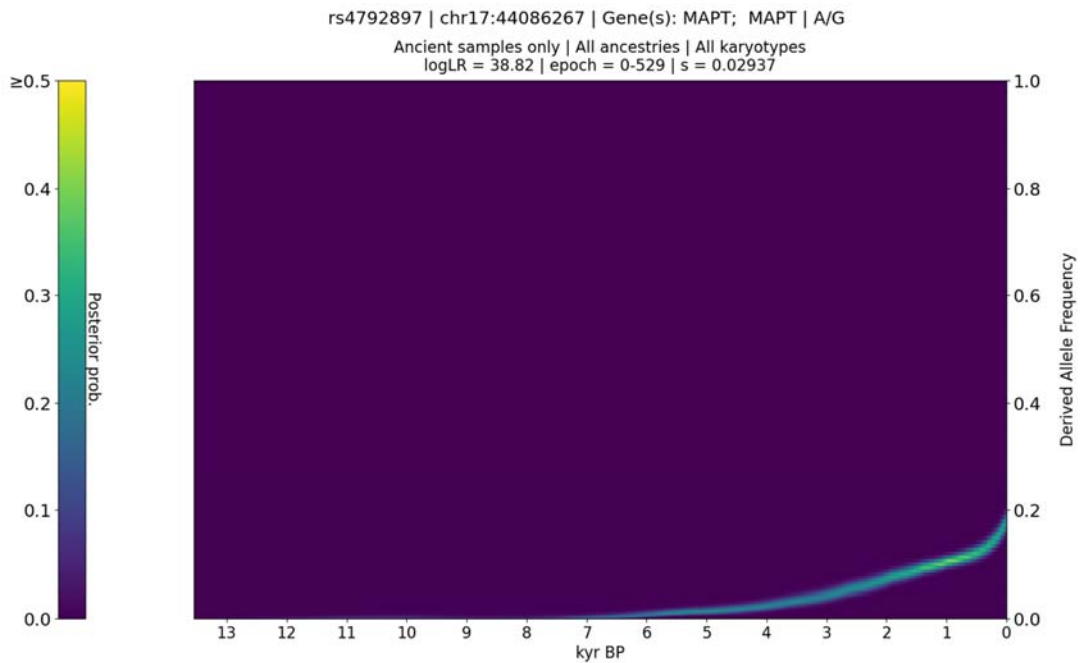

2810 A: Snoring (PMID: 30804565)

2811 **Figure S4a.14.** CLUES plot of the aDNA time series analysis for all West Eurasian samples  
2812 in the imputed dataset, showing the posterior probability of the derived allele frequency  
2813 trajectory for rs4792897, the most significant SNP in the selection peak spanning  
2814 chr17:36615969-47588760.

2815 The eleventh peak spanned the region chr17:36615969-47588760, with the most significant  
2816 SNP being rs4792897 (*MAPT*;  $p=4.65e-10$ ;  $s=0.0294$ ), associated with snoring<sup>60</sup>.

2817  
2818  
2819  
2820  
2821

2822 Selection in simulations with Ancestral Paintings

2823 *CLUES* analysis of all frequency paired simulated SNPs in both the true paths and inferred  
2824 paths simulations detected no genome-wide significant sweep loci, indicating that the false  
2825 positive rate of our ancestry stratified selection analysis is low.

2826

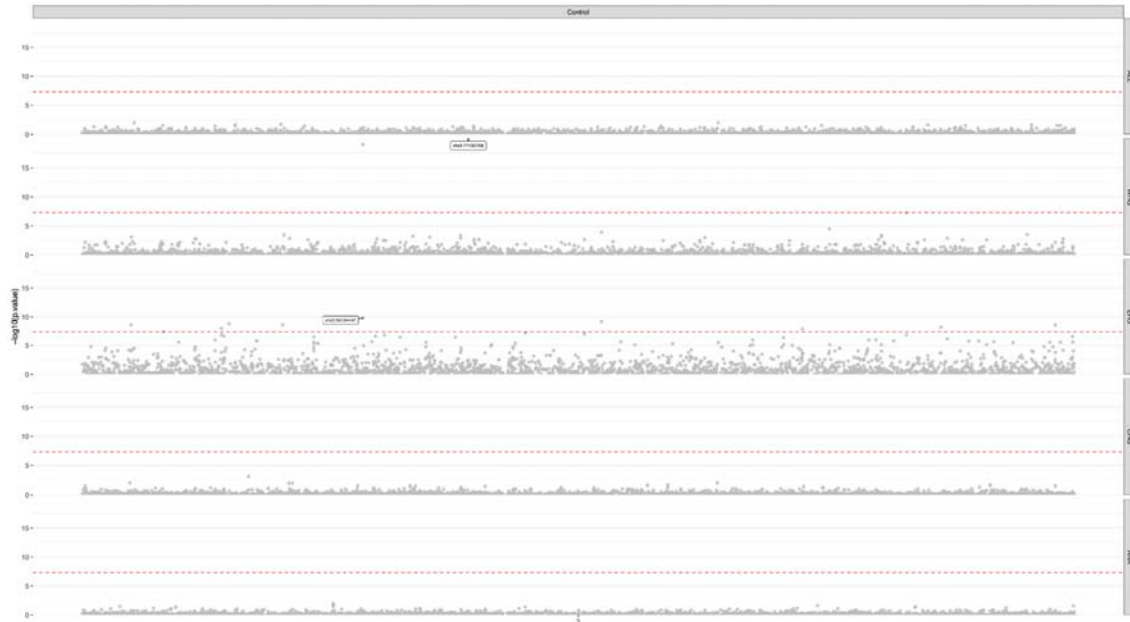

2827

2828 **Figure S4a.15.** Manhattan plot of the p-values from running *CLUES* on a neutral simulation  
2829 of chr3, using the true simulated paths of each ancestry painting. The first row shows results  
2830 for all ancient samples considered in aggregate, and each subsequent row shows the results  
2831 conditional on one of the four specific ancestral paintings: ANA (Anatolian Farmers), CHG  
2832 (Caucasus Hunter-gatherers), WHG (Western Hunter-gatherers) and EHG (Eastern Hunter-  
2833 gatherers).

2834



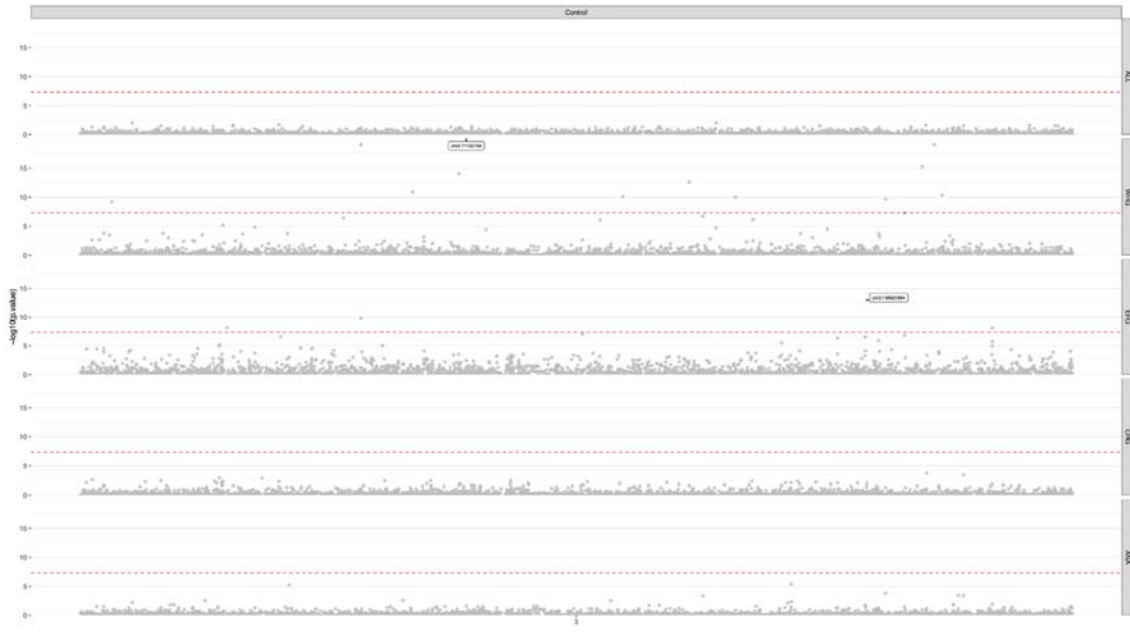

2835  
 2836  
 2837  
 2838  
 2839  
 2840  
 2841  
 2842

**Figure S4a.16.** Manhattan plot of the p-values from running *CLUES* on a neutral simulation of chr3, using the inferred paths of each ancestry painting. The first row shows results for all ancient samples considered in aggregate, and each subsequent row shows the results conditional on one of the four specific ancestral paintings: ANA (Anatolian Farmers), CHG (Caucasus Hunter-gatherers), WHG (Western Hunter-gatherers) and EHG (Eastern Hunter-gatherers).

2843 Selection in aDNA with Ancestral Paintings

2844 CLUES analysis of all GWAS (n=33,323) and Control group SNPs (n=33,323) in the aDNA  
2845 with Ancestral Paintings dataset identified 409 genome-wide significant SNPs ( $p < 5e-8$ ); 346  
2846 in the GWAS group and 63 in the Control group. Using a Bonferroni corrected significance  
2847 threshold, we detected 758 significant SNPs ( $p < 1.50e-06$ ); 593 in the GWAS group  
2848 (78.23%) and 165 in the Control group. Within the GWAS group, we identified 21 non-  
2849 overlapping Bonferroni corrected significant selection peaks across all ancestries (see Fig.  
2850 S4a.17; Supplementary Table XVI).  
2851

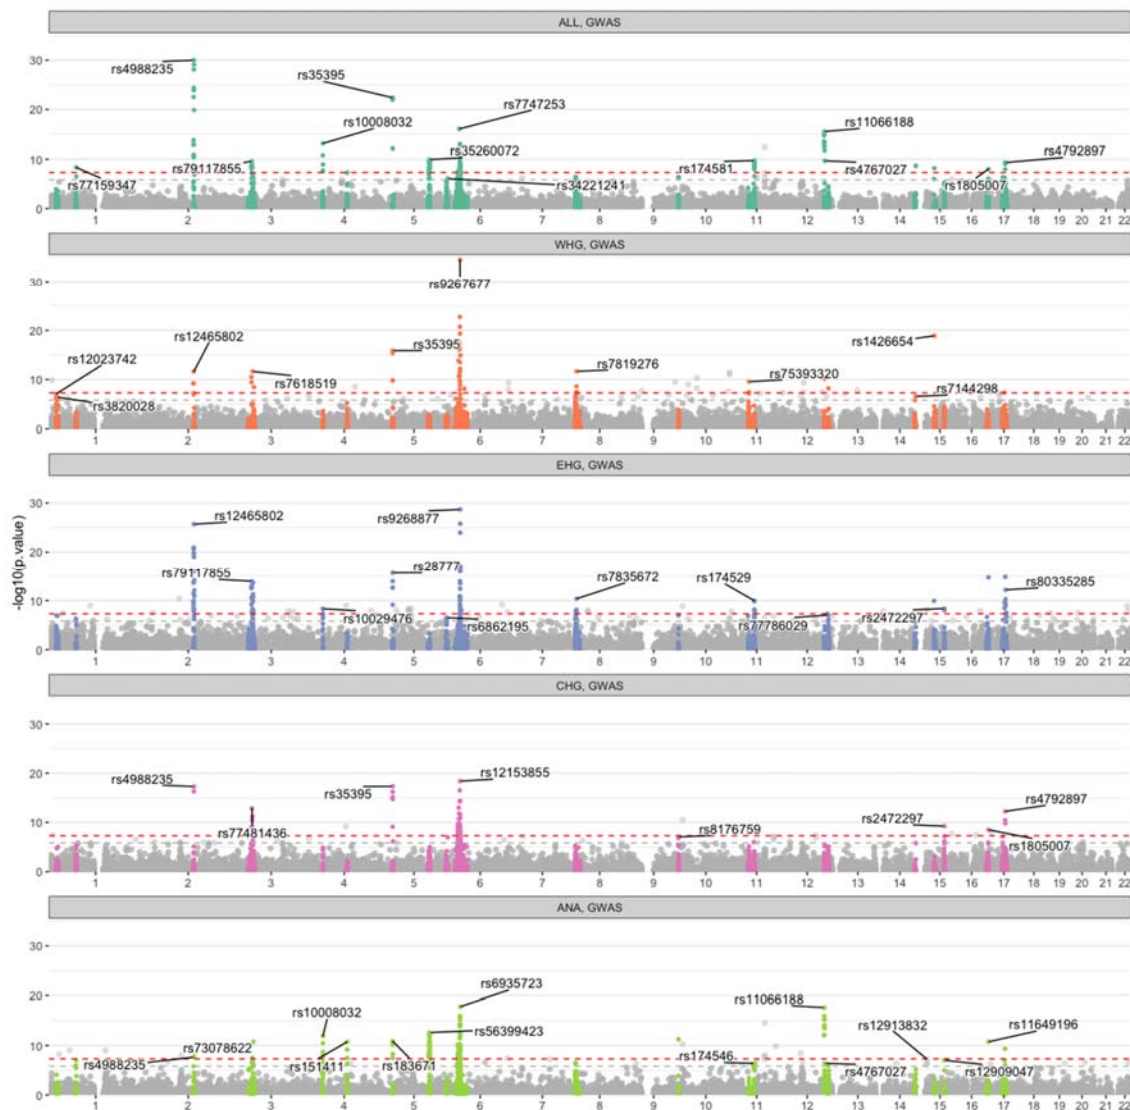

2852  
2853 **Figure S4a.17.** Manhattan plot of the p-values from running CLUES on an aDNA time series  
2854 conditioned on ancestry paintings from all West Eurasian samples in the imputed dataset for  
2855 GWAS SNPs from the GWAS Catalog. The first row shows results for all ancient samples  
2856 considered in aggregate, and each subsequent row shows the results conditional on one of

2857 the four specific ancestral paintings: ANA (Anatolian Farmers), CHG (Caucasus Hunter-  
2858 gatherers), WHG (Western Hunter-gatherers) and EHG (Eastern Hunter-gatherers).  
2859

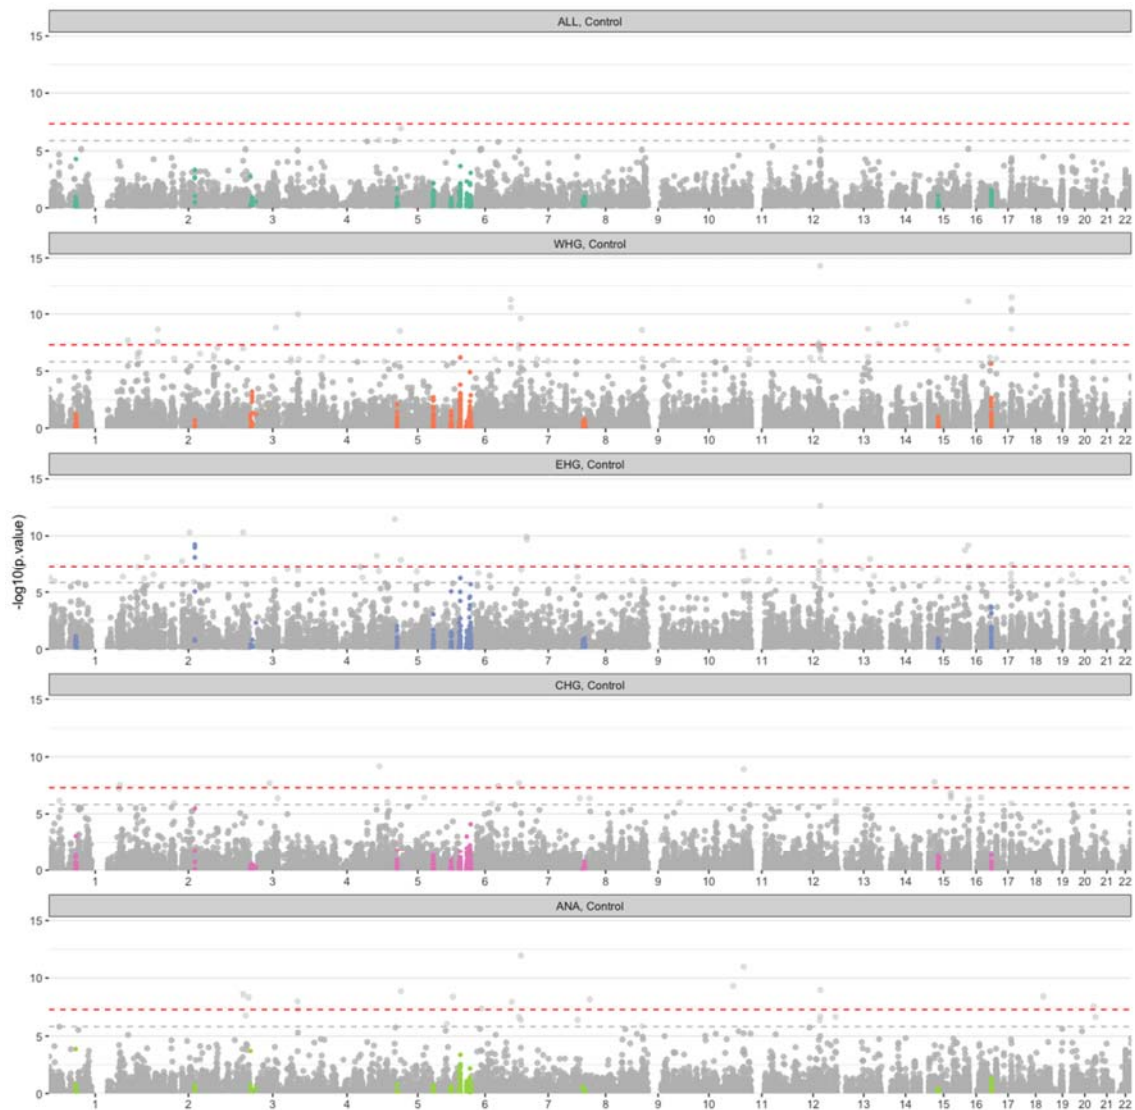

2860  
2861 **Figure S4a.18.** Manhattan plot of the p-values from running *CLUES* on an aDNA time series  
2862 conditioned on ancestry paintings from all West Eurasian samples in the imputed dataset for  
2863 Control SNPs, frequency paired with the GWAS SNPs. The first row shows results for all  
2864 ancient samples considered in aggregate, and each subsequent row shows the results  
2865 conditional on one of the four specific ancestral paintings: ANA (Anatolian Farmers), CHG  
2866 (Caucasus Hunter-gatherers), WHG (Western Hunter-gatherers) and EHG (Eastern Hunter-  
2867 gatherers).  
2868

2869 Peak 1: AL591122.1

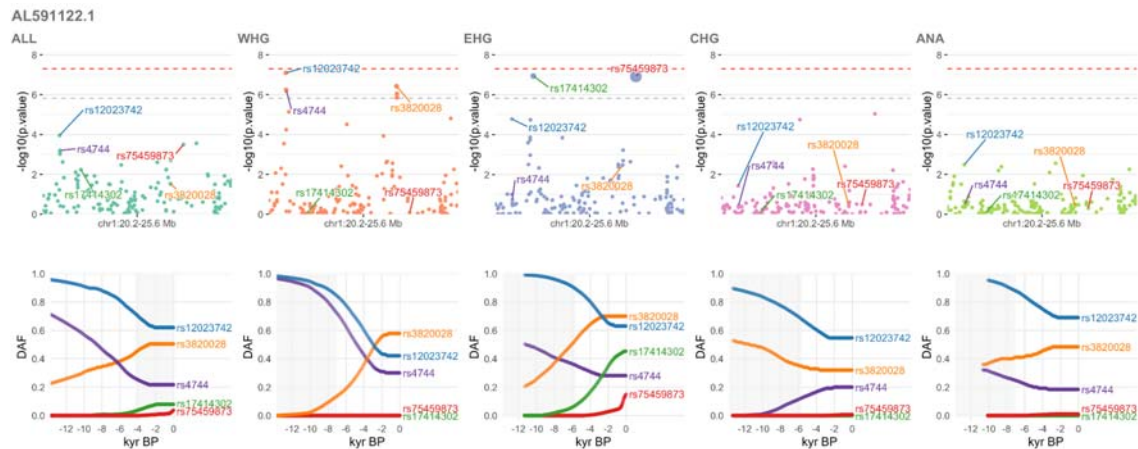

2870

2871

**Figure S4a.19.** Selection at the *AL591122.1* locus, spanning chr1:20236729-25570080.

2872

Results for the pan-ancestry analysis (ALL) plus the four marginal ancestries: Western hunter-gatherers (WHG), Eastern hunter-gatherers (EHG), Caucasus hunter-gatherers (CHG) and Anatolian farmers (ANA). Row one shows zoomed Manhattan plots of the p-values for each ancestry (significant SNPs sized by their selection coefficients), and row two shows allele trajectories for the top SNPs across all ancestries.

2877

This peak spanned the region chr1:20236729-25570080, with significant SNPs including:

2878

- rs12023742 (*PLA2G2E - RN7SL304P*; WHG;  $p=8.10e-08$ ;  $s=-0.0136$ ), associated with group IIA secretory phospholipase A2 levels in individuals with elevated hsCRP<sup>61</sup>.
- rs17414302 (*PINK1-AS, PINK1*; EHG;  $p=1.16e-07$ ;  $s=0.0185$ ), associated with Household income (MTAG); Intelligence (MTAG)<sup>37,62</sup>.
- rs75459873 (*MIR378F - H3P1*; EHG;  $p=1.21e-07$ ;  $s=0.0437$ ), associated with Psychotic experience (distressing)<sup>63</sup>.
- rs3820028 (*E2F2*; WHG;  $p=3.75e-07$ ;  $s=0.0144$ ), associated with Heel bone mineral density<sup>58</sup>.
- rs4744 (*PLA2G2A*; WHG;  $p=5.67e-07$ ;  $s=-0.0128$ ), associated with Blood protein levels<sup>41</sup>.

2889

2890 Peak 2: NEGR1

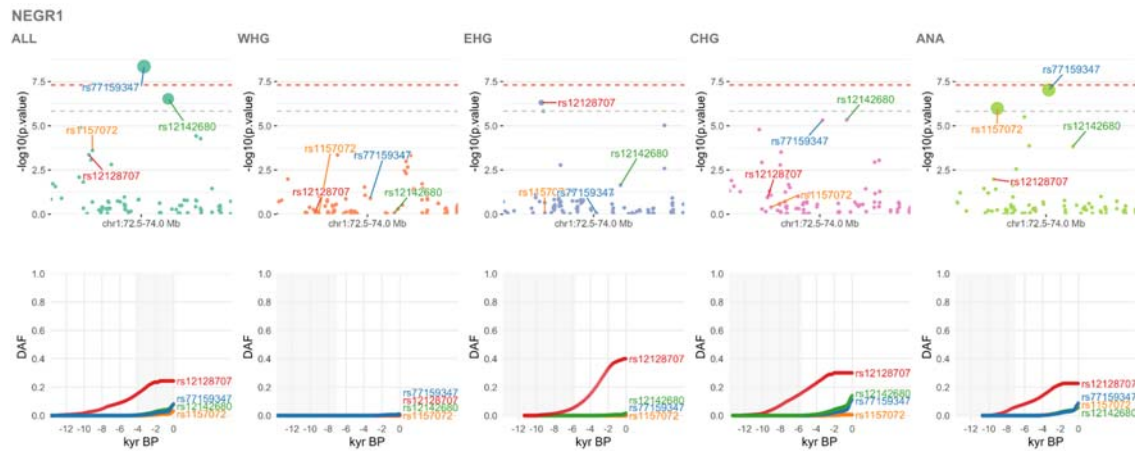

2891

2892 **Figure S4a.20.** Selection at the *NEGR1* locus, spanning chr1:72480859-73978570. Results  
 2893 for the pan-ancestry analysis (ALL) plus the four marginal ancestries: Western hunter-  
 2894 gatherers (WHG), Eastern hunter-gatherers (EHG), Caucasus hunter-gatherers (CHG) and  
 2895 Anatolian farmers (ANA). Row one shows zoomed Manhattan plots of the p-values for each  
 2896 ancestry (significant SNPs sized by their selection coefficients), and row two shows allele  
 2897 trajectories for the top SNPs across all ancestries.

2898 This peak spanned the region chr1:72480859-73978570, with significant SNPs including:

- 2899 • rs77159347 (*LINC02797,AL583808.1*; ALL;  $p=4.48e-09$ ;  $s=0.052$ ), associated with  
 2900 Household income (MTAG)<sup>37</sup>.
- 2901 • rs12142680 (*KRT8P21 - RN7SKP19*; ALL;  $p=2.99e-07$ ;  $s=0.0437$ ), associated with  
 2902 Educational attainment (years of education)<sup>64</sup>.
- 2903 • rs12128707 (*NEGR1*; EHG;  $p=4.93e-07$ ;  $s=0.0182$ ), associated with Cognitive  
 2904 performance; Cognitive performance (MTAG); Intelligence; Intelligence (MTAG)  
 2905 62,65,66.
- 2906 • rs1157072 (*NEGR1*; ANA;  $p=1.04e-06$ ;  $s=0.0498$ ), associated with Household  
 2907 income (MTAG); Intelligence (MTAG)<sup>37,62</sup>.

2908

2909 Peak 3: MCM6

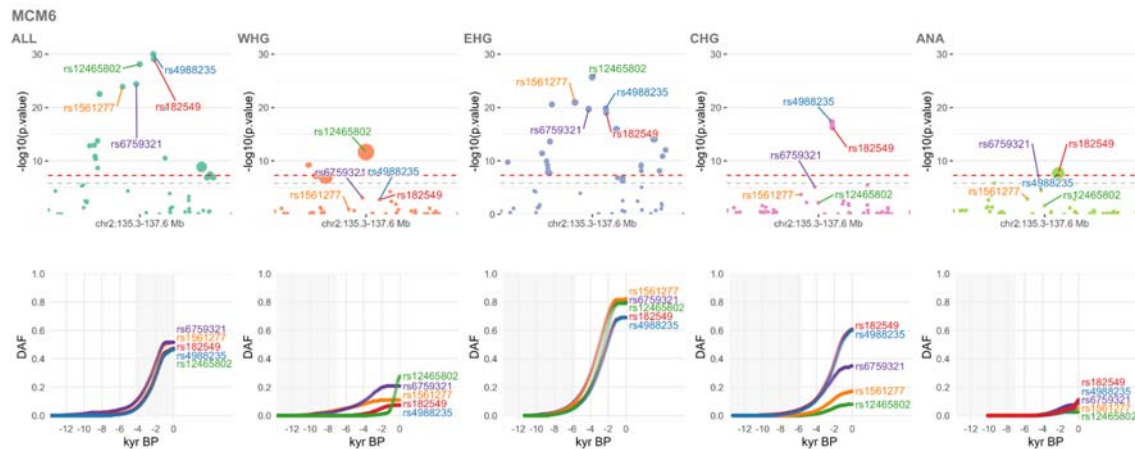

2910 **Figure S4a.21.** Selection at the *MCM6* locus, spanning chr2:135300859-137564020. Results  
 2911 for the pan-ancestry analysis (ALL) plus the four marginal ancestries: Western hunter-  
 2912 gatherers (WHG), Eastern hunter-gatherers (EHG), Caucasus hunter-gatherers (CHG) and  
 2913 Anatolian farmers (ANA). Row one shows zoomed Manhattan plots of the p-values for each  
 2914 ancestry (significant SNPs sized by their selection coefficients), and row two shows allele  
 2915 trajectories for the top SNPs across all ancestries.  
 2916

2917 This peak spanned the region chr2:135300859-137564020, with significant SNPs including:

- 2918 • rs4988235 (*MCM6*; ALL;  $p=9.86e-31$ ;  $s=0.0199$ ), associated with Lactase  
 2919 persistence; Blood protein levels; Body mass index; Hip circumference<sup>38-42</sup>.
- 2920 • rs182549 (*MCM6*; ALL;  $p=8.44e-30$ ;  $s=0.0198$ ), associated with 1,5-anhydroglucitol  
 2921 levels<sup>67</sup>.
- 2922 • rs12465802 (*R3HDM1*; ALL;  $p=7.71e-29$ ;  $s=0.0196$ ), associated with Blood protein  
 2923 levels; Mosquito bite size; Urinary metabolite levels in chronic kidney disease<sup>34,40,68</sup>.
- 2924 • rs6759321 (*R3HDM1*; ALL;  $p=4.07e-25$ ;  $s=0.0188$ ), associated with Hand grip  
 2925 strength<sup>69</sup>.
- 2926 • rs1561277 (*ZRANB3*; ALL;  $p=1.24e-24$ ;  $s=0.0188$ ), associated with Hip  
 2927 circumference<sup>38</sup>.

2928

2929 Peak 4: CACNA2D2

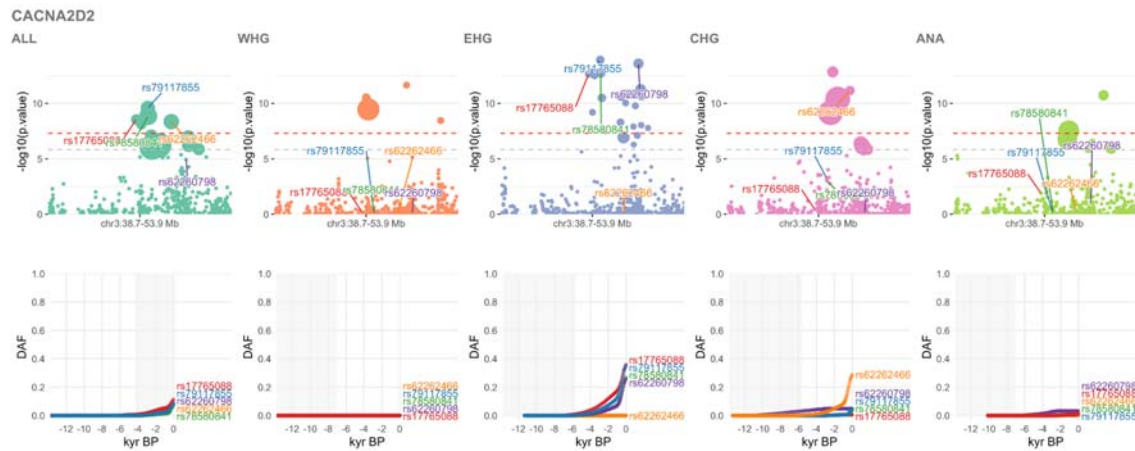

2930

2931

**Figure S4a.22.** Selection at the *CACNA2D2* locus, spanning chr3:38723219-53850000.

2932

Results for the pan-ancestry analysis (ALL) plus the four marginal ancestries: Western

2933

hunter-gatherers (WHG), Eastern hunter-gatherers (EHG), Caucasus hunter-gatherers

2934

(CHG) and Anatolian farmers (ANA). Row one shows zoomed Manhattan plots of the p-

2935

values for each ancestry (significant SNPs sized by their selection coefficients), and row two

2936

shows allele trajectories for the top SNPs across all ancestries.

2937

This peak spanned the region chr3:38723219-53850000, with significant SNPs including:

2938

- rs79117855 (*PTH1R* - *AC109583.3*; EHG;  $p=1.18e-14$ ;  $s=0.0305$ ), associated with Blood protein levels <sup>43</sup>.

2939

2940

- rs62260798 (*GNAI2*; EHG;  $p=2.52e-14$ ;  $s=0.0373$ ), associated with Morning person <sup>70</sup>.

2941

2942

- rs78580841 (*CCDC12*; EHG;  $p=1.68e-13$ ;  $s=0.037$ ), associated with Chronotype <sup>70</sup>.

2943

- rs17765088 (*CCR9*, *LZTFL1*; EHG;  $p=2.22e-13$ ;  $s=0.0257$ ), associated with

2944

Macrophage inflammatory protein 1b levels <sup>71</sup>.

2945

- rs62262466 (*ARIH2*; CHG;  $p=6.98e-12$ ;  $s=0.0351$ ), associated with Morning person <sup>70</sup>.

2946

2947

2948 Peak 5: *KLF3-AS1*

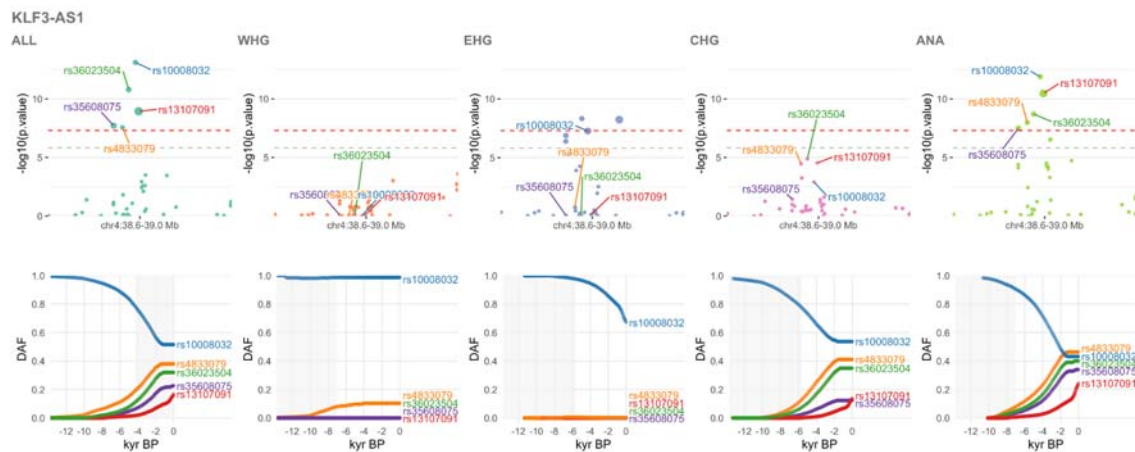

2949

2950

**Figure S4a.23.** Selection at the *KLF3-AS1* locus, spanning chr4:38593259-38966080.

2951

Results for the pan-ancestry analysis (ALL) plus the four marginal ancestries: Western

2952

hunter-gatherers (WHG), Eastern hunter-gatherers (EHG), Caucasus hunter-gatherers

2953

(CHG) and Anatolian farmers (ANA). Row one shows zoomed Manhattan plots of the p-

2954

values for each ancestry (significant SNPs sized by their selection coefficients), and row two

2955

shows allele trajectories for the top SNPs across all ancestries.

2956

This peak spanned the region chr4:38593259-38966080, with significant SNPs including:

2957

- rs10008032 (*KLF3 - RNA5SP158*; ALL;  $p=7.66e-14$ ;  $s=-0.0165$ ), associated with Allergic disease (asthma, hay fever or eczema) <sup>44</sup>.

2958

- rs36023504 (*KLF3*; ALL;  $p=1.62e-11$ ;  $s=0.0179$ ), associated with Body mass index; Red cell distribution width <sup>58</sup>.

2959

- rs13107091 (*RNA5SP158 - TLR10*; ANA;  $p=3.41e-11$ ;  $s=0.0281$ ), associated with Atopic asthma <sup>72</sup>.

2960

- rs4833079 (*KLF3-AS1*; ANA;  $p=1.02e-08$ ;  $s=0.0158$ ), associated with Body mass index <sup>42</sup>.

2961

- rs35608075 (*LINC02278 - KLF3-AS1*; ALL;  $p=1.95e-08$ ;  $s=0.0208$ ), associated with Male-pattern baldness <sup>73</sup>.

2962

2963

2964

2965

2966

2967



2968 Peak 6: BANK1

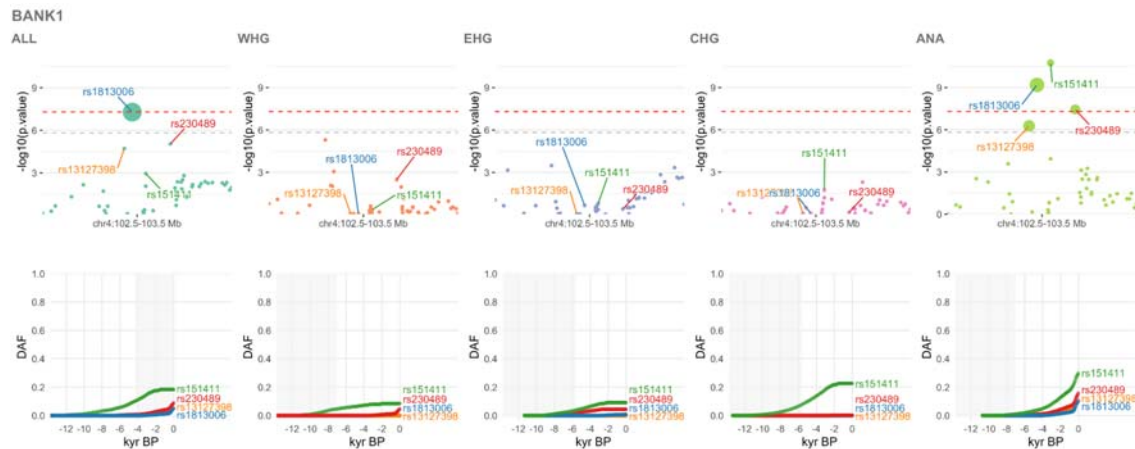

2969

2970 **Figure S4a.24.** Selection at the *BANK1* locus, spanning chr4:102507109-103525350.

2971

2972 Results for the pan-ancestry analysis (ALL) plus the four marginal ancestries: Western

2973

2974 hunter-gatherers (WHG), Eastern hunter-gatherers (EHG), Caucasus hunter-gatherers

2975

2976 (CHG) and Anatolian farmers (ANA). Row one shows zoomed Manhattan plots of the p-  
2977 values for each ancestry (significant SNPs sized by their selection coefficients), and row two  
2978 shows allele trajectories for the top SNPs across all ancestries.

2976

2977 This peak spanned the region chr4:102507109-103525350, with significant SNPs including:

2977

- rs151411 (*BANK1* - *SLC39A8*; ANA;  $p=1.80e-11$ ;  $s=0.0247$ ), associated with General cognitive ability<sup>74</sup>.

2978

2979

- rs1813006 (*BANK1* - *SLC39A8*; ANA;  $p=6.60e-10$ ;  $s=0.0563$ ), associated with Intelligence (MTAG)<sup>62</sup>.

2980

2981

- rs230489 (*AF213884.2* - *AF213884.3*; ANA;  $p=3.63e-08$ ;  $s=0.036$ ), associated with Brain region volumes; General cognitive ability; Intelligence (MTAG)<sup>62,74,75</sup>.

2982

2983

- rs13127398 (*BANK1*, *AP002075.1*; ANA;  $p=5.36e-07$ ;  $s=0.0439$ ), associated with Cardiovascular disease<sup>58</sup>.

2984

2985

2986 Peak 7: SLC45A2

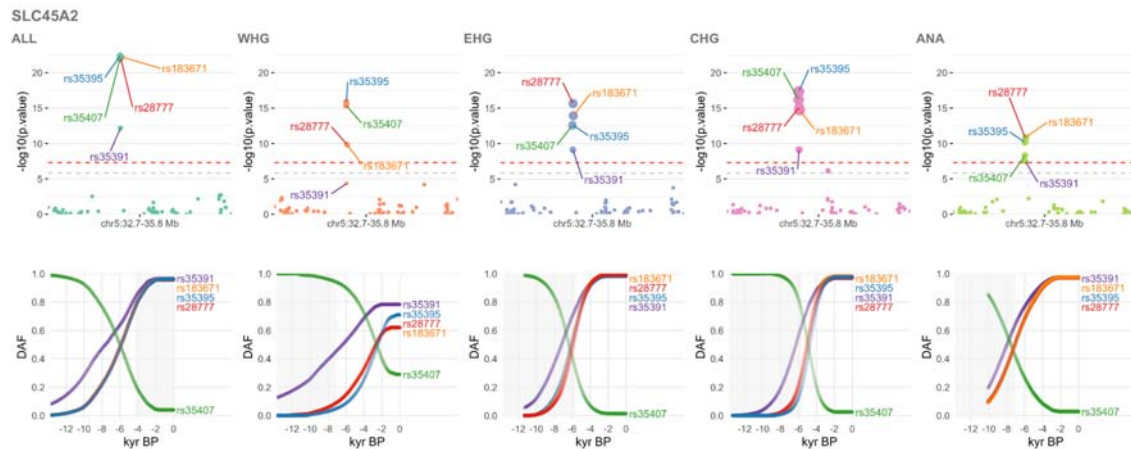

2987

2988 **Figure S4a.25.** Selection at the *SLC45A2* locus, spanning chr5:32710489-35848560.

2989

2990 Results for the pan-ancestry analysis (ALL) plus the four marginal ancestries: Western  
 2991 hunter-gatherers (WHG), Eastern hunter-gatherers (EHG), Caucasus hunter-gatherers  
 2992 (CHG) and Anatolian farmers (ANA). Row one shows zoomed Manhattan plots of the p-  
 2993 values for each ancestry (significant SNPs sized by their selection coefficients), and row two

2994

This peak spanned the region chr5:32710489-35848560, with significant SNPs including:

2995

- rs35395 (*SLC45A2*; ALL;  $p=4.13e-23$ ;  $s=0.022$ ), associated with Skin pigmentation <sup>76</sup>.

2996

- rs183671 (*SLC45A2*; ALL;  $p=5.51e-23$ ;  $s=0.0221$ ), associated with Hair color; Skin colour saturation; Skin pigmentation traits <sup>56,77,78</sup>.

2997

2998

- rs28777 (*SLC45A2*; ALL;  $p=8.48e-23$ ;  $s=0.0217$ ), associated with Black vs. blond hair color; Black vs. red hair color; Skin, hair and eye pigmentation (multivariate analysis) <sup>79,80</sup>.

2999

3000

3001

- rs35407 (*SLC45A2*; ALL;  $p=1.06e-22$ ;  $s=-0.0221$ ), associated with Basal cell carcinoma; Cutaneous squamous cell carcinoma; Keratinocyte cancer (MTAG); Melanoma; Squamous cell carcinoma <sup>52-54,59</sup>.

3002

3003

3004

- rs35391 (*SLC45A2*; ALL;  $p=6.87e-13$ ;  $s=0.0161$ ), associated with Tanning <sup>81</sup>.

3005

3006 Peak 8: SLC22A4

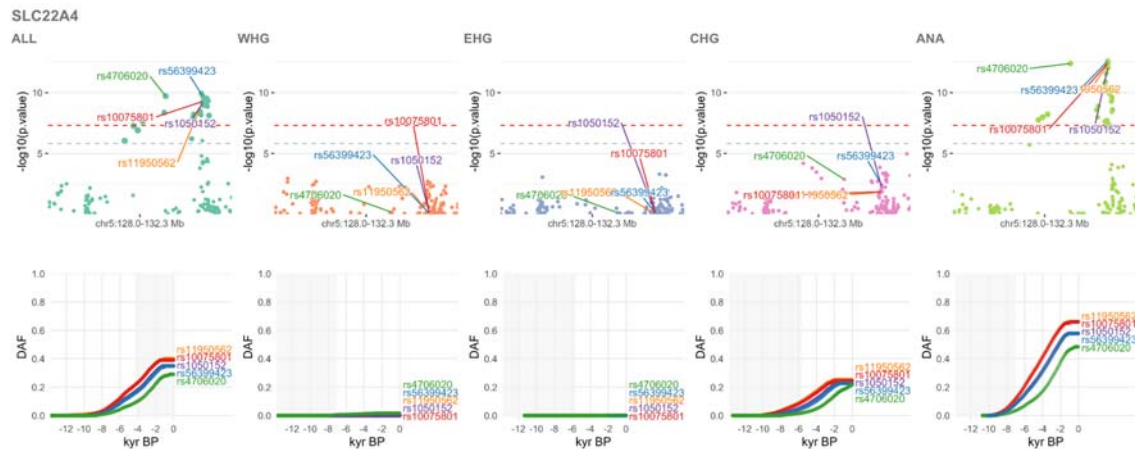

3007 **Figure S4a.26.** Selection at the *SLC22A4* locus, spanning chr5:128016159-132349650.  
 3008 Results for the pan-ancestry analysis (ALL) plus the four marginal ancestries: Western  
 3009 hunter-gatherers (WHG), Eastern hunter-gatherers (EHG), Caucasus hunter-gatherers  
 3010 (CHG) and Anatolian farmers (ANA). Row one shows zoomed Manhattan plots of the p-  
 3011 values for each ancestry (significant SNPs sized by their selection coefficients), and row two  
 3012 shows allele trajectories for the top SNPs across all ancestries.

3014 This peak spanned the region chr5:128016159-132349650, with significant SNPs including:

- 3015 • rs56399423 (*MIR3936HG,SLC22A4*; ANA;  $p=2.48e-13$ ;  $s=0.017$ ), associated with  
 3016 Inflammatory bowel disease <sup>82</sup>.
- 3017 • rs10075801 (*SLC22A4,MIR3936HG*; ANA;  $p=3.75e-13$ ;  $s=0.0164$ ), associated with  
 3018 Granulocyte count; Myeloid white cell count; Neutrophil count; Sum basophil  
 3019 neutrophil counts; Sum neutrophil eosinophil counts; White blood cell count <sup>83</sup>.
- 3020 • rs4706020 (*CDC42SE2*; ANA;  $p=4.03e-13$ ;  $s=0.0184$ ), associated with Itch intensity  
 3021 from mosquito bite; Itch intensity from mosquito bite adjusted by bite size <sup>34</sup>.
- 3022 • rs11950562 (*MIR3936HG,SLC22A4*; ANA;  $p=5.38e-13$ ;  $s=0.0163$ ), associated with  
 3023 Blood metabolite levels; Mean platelet volume <sup>83,84</sup>.
- 3024 • rs1050152 (*SLC22A4,MIR3936HG*; ANA;  $p=8.09e-13$ ;  $s=0.0167$ ), associated with  
 3025 Nasal polyps <sup>85</sup>.

3026

3027 Peak 9: GRK6

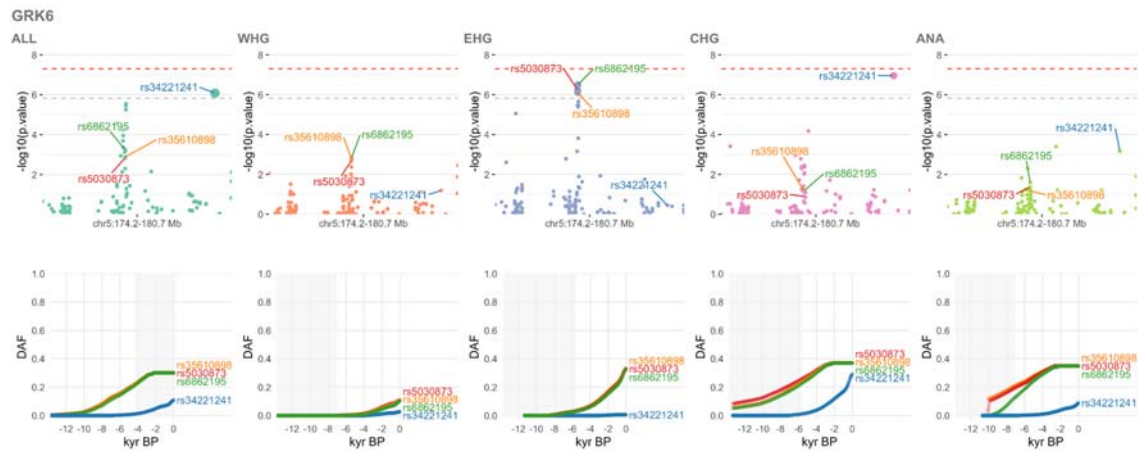

3028 **Figure S4a.27.** Selection at the *GRK6* locus, spanning chr5:174156169-180661980. Results  
 3029 for the pan-ancestry analysis (ALL) plus the four marginal ancestries: Western hunter-  
 3030 gatherers (WHG), Eastern hunter-gatherers (EHG), Caucasus hunter-gatherers (CHG) and  
 3031 Anatolian farmers (ANA). Row one shows zoomed Manhattan plots of the p-values for each  
 3032 ancestry (significant SNPs sized by their selection coefficients), and row two shows allele  
 3033 trajectories for the top SNPs across all ancestries.  
 3034

3035 This peak spanned the region chr5:174156169-180661980, with significant SNPs including:

- 3036 • rs34221241 (*FLT4*; CHG;  $p=1.11e-07$ ;  $s=0.0253$ ), associated with Blood protein  
 3037 levels <sup>40</sup>.
- 3038 • rs6862195 (*SLC34A1*; EHG;  $p=3.18e-07$ ;  $s=0.0232$ ), associated with Estimated  
 3039 glomerular filtration rate <sup>86</sup>.
- 3040 • rs5030873 (*SLC34A1*; EHG;  $p=5.85e-07$ ;  $s=0.0228$ ), associated with Creatinine  
 3041 levels <sup>87</sup>.
- 3042 • rs35610898 (*SLC34A1*; EHG;  $p=7.84e-07$ ;  $s=0.0224$ ), associated with Estimated  
 3043 glomerular filtration rate <sup>86</sup>.

3044

3045 Peak 10: HLA

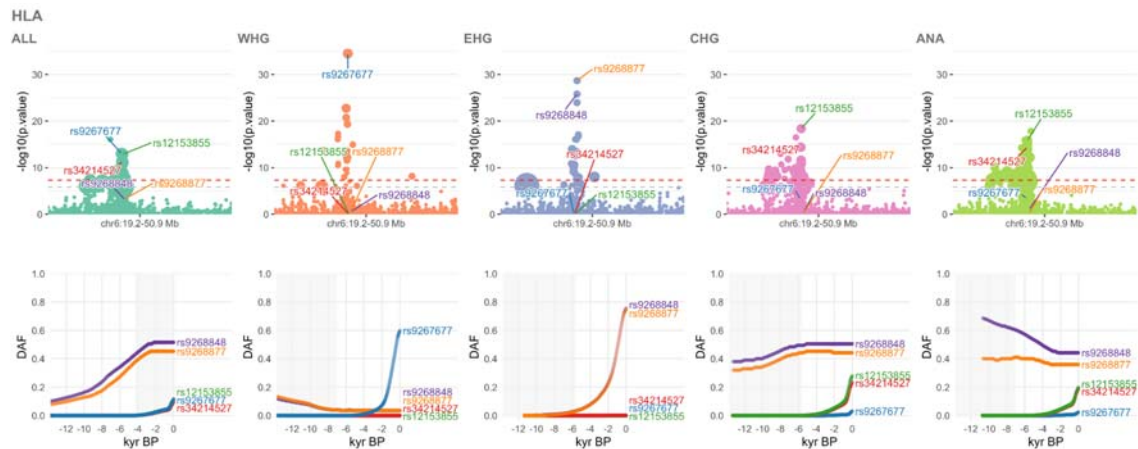

3046 **Figure S4a.28.** Selection at the *HLA* locus, spanning chr6:19191049-50921600. Results for  
 3047 the pan-ancestry analysis (ALL) plus the four marginal ancestries: Western hunter-gatherers  
 3048 (WHG), Eastern hunter-gatherers (EHG), Caucasus hunter-gatherers (CHG) and Anatolian  
 3049 farmers (ANA). Row one shows zoomed Manhattan plots of the p-values for each ancestry  
 3050 (significant SNPs sized by their selection coefficients), and row two shows allele trajectories  
 3051 for the top SNPs across all ancestries.  
 3052

3053 This peak spanned the region chr6:19191049-50921600, with significant SNPs including:

- 3054 • rs9267677 (*C2*; WHG;  $p=3.03e-35$ ;  $s=0.0365$ ), associated with Cognitive  
 3055 performance (MTAG); Educational attainment (MTAG); Educational attainment (years  
 3056 of education); Highest math class taken (MTAG) <sup>66</sup>.
- 3057 • rs9268877 (*HLA-DRB9*; EHG;  $p=2.07e-29$ ;  $s=0.0249$ ), associated with Poor  
 3058 prognosis in Crohn's disease; Ulcerative colitis <sup>88-90</sup>.
- 3059 • rs9268848 (*HLA-DRB9*; EHG;  $p=1.56e-26$ ;  $s=0.0247$ ), associated with Nonatopic  
 3060 asthma; Urate levels <sup>72,91</sup>.
- 3061 • rs12153855 (*TNXB,AL662884.2*; CHG;  $p=4.19e-19$ ;  $s=0.0334$ ), associated with Age-  
 3062 related macular degeneration; Atopic dermatitis <sup>92,93</sup>.
- 3063 • rs34214527 (*TNXB*; CHG;  $p=4.09e-15$ ;  $s=0.0348$ ), associated with Highest math  
 3064 class taken <sup>66</sup>.

3065

3066 Peak 11: MSRA

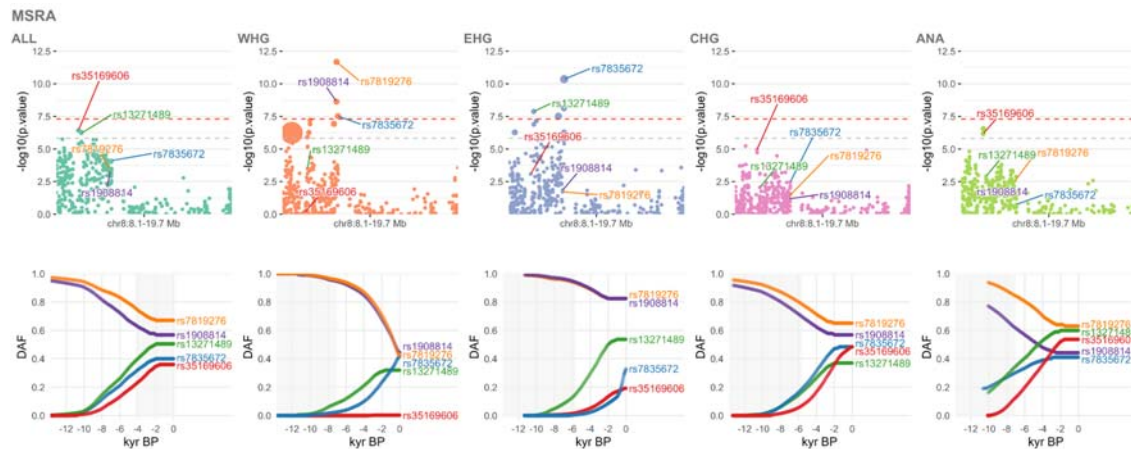

3067

3068

**Figure S4a.29.** Selection at the *MSRA* locus, spanning chr8:8142579-19746880. Results for the pan-ancestry analysis (ALL) plus the four marginal ancestries: Western hunter-gatherers (WHG), Eastern hunter-gatherers (EHG), Caucasus hunter-gatherers (CHG) and Anatolian farmers (ANA). Row one shows zoomed Manhattan plots of the p-values for each ancestry (significant SNPs sized by their selection coefficients), and row two shows allele trajectories for the top SNPs across all ancestries.

3072

3073

This peak spanned the region chr8:8142579-19746880, with significant SNPs including:

3074

- rs7819276 (*AC025857.1 - OR7E158P*; WHG;  $p=2.10e-12$ ;  $s=-0.0207$ ), associated with General factor of neuroticism <sup>94</sup>.
- rs7835672 (*AC107918.3*; EHG;  $p=4.43e-11$ ;  $s=0.0287$ ), associated with General factor of neuroticism <sup>94</sup>.
- rs1908814 (*AC025857.1 - OR7E158P*; WHG;  $p=2.33e-09$ ;  $s=-0.0201$ ), associated with General factor of neuroticism; Neuroticism <sup>94,95</sup>.
- rs13271489 (*LINC00599 - AC034111.2*; EHG;  $p=1.33e-08$ ;  $s=0.016$ ), associated with Diastolic blood pressure x smoking status (current vs non-current) interaction (2df test); Diastolic blood pressure x smoking status (ever vs never) interaction (2df test); Systolic blood pressure x smoking status (current vs non-current) interaction (2df test); Systolic blood pressure x smoking status (ever vs never) interaction (2df test) <sup>96</sup>.
- rs35169606 (*TNKS*; ALL;  $p=3.85e-07$ ;  $s=0.0137$ ), associated with Lifetime smoking index <sup>97</sup>.

3086

3087

3088 Peak 12: ABO

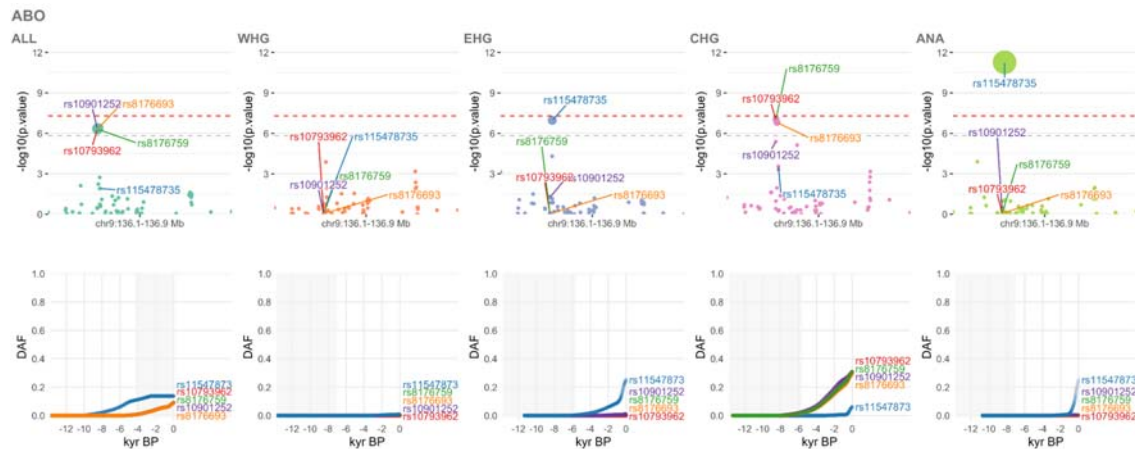

3089

3090

**Figure S4a.30.** Selection at the *ABO* locus, spanning chr9:136127999-136925660. Results for the

3091

pan-ancestry analysis (ALL) plus the four marginal ancestries: Western hunter-gatherers (WHG),

3092

Eastern hunter-gatherers (EHG), Caucasus hunter-gatherers (CHG) and Anatolian farmers (ANA).

3093

Row one shows zoomed Manhattan plots of the p-values for each ancestry (significant SNPs sized by

3094

their selection coefficients), and row two shows allele trajectories for the top SNPs across all

3095

ancestries.

3096

This peak spanned the region chr9:136127999-136925660, with significant SNPs including:

3097

- rs115478735 (*ABO*; ANA;  $p=5.36e-12$ ;  $s=0.095$ ), associated with Blood protein levels <sup>40</sup>.

3098

- rs8176759 (*ABO*; CHG;  $p=8.90e-08$ ;  $s=0.0227$ ), associated with Granulocyte percentage of myeloid white cells; Plateletcrit <sup>83</sup>.

3099

- rs10793962 (*ABO*; CHG;  $p=9.78e-08$ ;  $s=0.0226$ ), associated with Blood protein levels; Intraocular pressure <sup>40,98,99</sup>.

3100

- rs8176693 (*ABO*; CHG;  $p=1.55e-07$ ;  $s=0.0233$ ), associated with Blood protein levels; Blood protein levels in cardiovascular risk; Endothelial growth factor levels; High serum lipase activity; Serum lipase activity <sup>40,100-102</sup>.

3101

- rs10901252 (*ABO*; ALL;  $p=4.39e-07$ ;  $s=0.0371$ ), associated with Blood protein levels; Hematocrit; Hemoglobin concentration; vWF levels <sup>43,83,103</sup>.

3102

3103

3104

3105

3106

3107

3108 Peak 13: MYBPC3

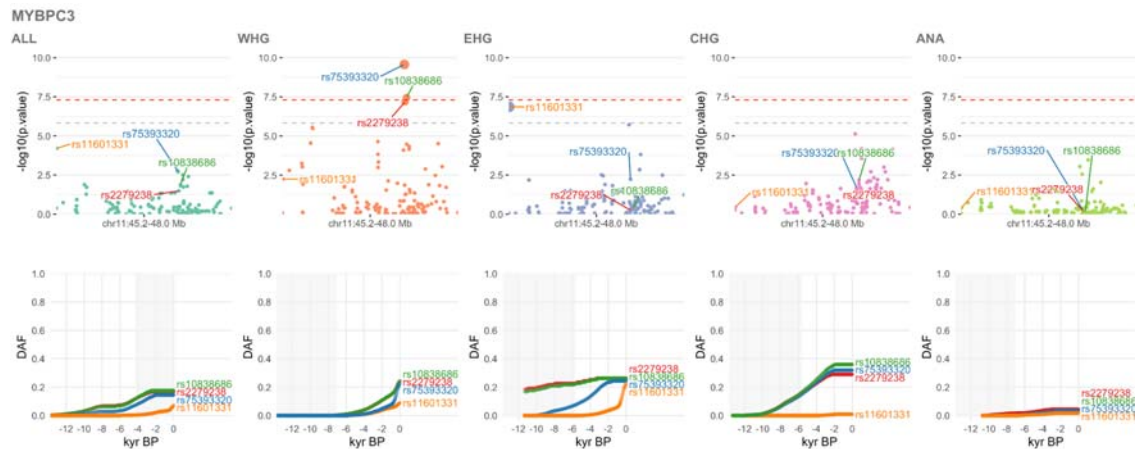

3109

**Figure S4a.31.** Selection at the *MYBPC3* locus, spanning chr11:45227569-48018360. Results for the pan-ancestry analysis (ALL) plus the four marginal ancestries: Western hunter-gatherers (WHG), Eastern hunter-gatherers (EHG), Caucasus hunter-gatherers (CHG) and Anatolian farmers (ANA). Row one shows zoomed Manhattan plots of the p-values for each ancestry (significant SNPs sized by their selection coefficients), and row two shows allele trajectories for the top SNPs across all ancestries.

3116

This peak spanned the region chr11:45227569-48018360, with significant SNPs including:

3117

- rs75393320 (*ACP2*; WHG;  $p=2.73e-10$ ;  $s=0.0351$ ), associated with HDL cholesterol <sup>104</sup>.

3118

- rs10838686 (*MADD*; WHG;  $p=3.56e-08$ ;  $s=0.0261$ ), associated with High density lipoprotein cholesterol levels <sup>105</sup>.

3119

- rs2279238 (*NR1H3*; WHG;  $p=6.49e-08$ ;  $s=0.0261$ ), associated with Creatinine levels <sup>106</sup>.

3121

- rs11601331 (*TSPAN18*; EHG;  $p=1.38e-07$ ;  $s=0.04$ ), associated with Cortical brain region measurements (area, volume and thickness) <sup>107</sup>.

3122

3123



3124 Peak 14: FADS2

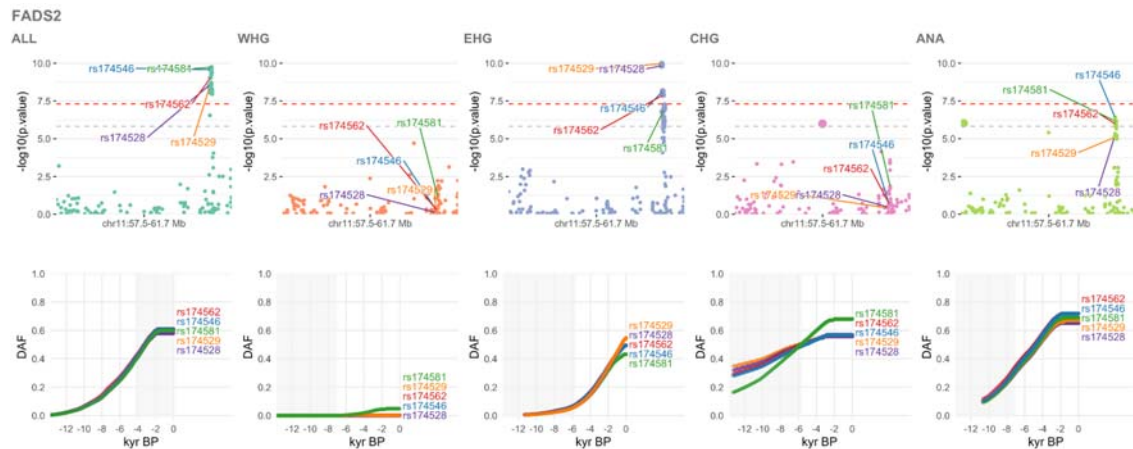

3125 **Figure S4a.32.** Selection at the *FADS2* locus, spanning chr11:57467039-61706010. Results for the  
 3126 pan-ancestry analysis (ALL) plus the four marginal ancestries: Western hunter-gatherers (WHG),  
 3127 Eastern hunter-gatherers (EHG), Caucasus hunter-gatherers (CHG) and Anatolian farmers (ANA).  
 3128 Row one shows zoomed Manhattan plots of the p-values for each ancestry (significant SNPs sized by  
 3129 their selection coefficients), and row two shows allele trajectories for the top SNPs across all  
 3130 ancestries.  
 3131

3132 This peak spanned the region chr11:57467039-61706010, with significant SNPs including:

- 3133 • rs174529 (*TMEM258,MYRF*; EHG;  $p=1.12e-10$ ;  $s=0.0198$ ), associated with HDL  
 3134 cholesterol; Heel bone mineral density; High density lipoprotein cholesterol levels; Low  
 3135 density lipoprotein cholesterol levels; Total cholesterol levels; Triglyceride levels;  
 3136 Triglycerides <sup>58,105,108–110</sup>.
- 3137 • rs174528 (*TMEM258,MYRF*; EHG;  $p=1.48e-10$ ;  $s=0.0198$ ), associated with Gondoic acid  
 3138 (20:1n-9) levels; Phosphatidylcholine-ether levels; Plasma omega-6 polyunsaturated fatty  
 3139 acid levels (arachidonic acid); Serum metabolite ratios in chronic kidney disease; Trans  
 3140 fatty acid levels; Vaccenic acid (18:1n-7) levels <sup>47,111–114</sup>.
- 3141 • rs174581 (*FADS2*; ALL;  $p=1.87e-10$ ;  $s=0.0133$ ), associated with Male-pattern baldness;  
 3142 Serum metabolite ratios in chronic kidney disease <sup>46,47</sup>.
- 3143 • rs174546 (*FADS2,FADS1*; ALL;  $p=2.65e-10$ ;  $s=0.0131$ ), associated with C-reactive  
 3144 protein levels or HDL-cholesterol levels (pleiotropy); C-reactive protein levels or  
 3145 triglyceride levels (pleiotropy); Change in serum metabolite levels; Change in serum  
 3146 metabolite levels (CMS); Cholesterol, total; Glycerophospholipid levels; HDL cholesterol;  
 3147 HDL cholesterol levels; High density lipoprotein cholesterol levels; LDL cholesterol; LDL  
 3148 cholesterol levels; Low density lipoprotein cholesterol levels; Plasma omega-6  
 3149 polyunsaturated fatty acid levels (gamma-linolenic acid); QT interval; Serum metabolite  
 3150 levels; Serum metabolite levels (CMS); Total cholesterol levels; Trans fatty acid levels;  
 3151 Triglyceride levels; Triglycerides <sup>105,110–112,115–121</sup>.
- 3152 • rs174562 (*FADS2,FADS1*; ALL;  $p=8.63e-10$ ;  $s=0.0127$ ), associated with Asthma; Serum  
 3153 metabolite ratios in chronic kidney disease <sup>47,122</sup>.

3154 Peak 15: HECTD4

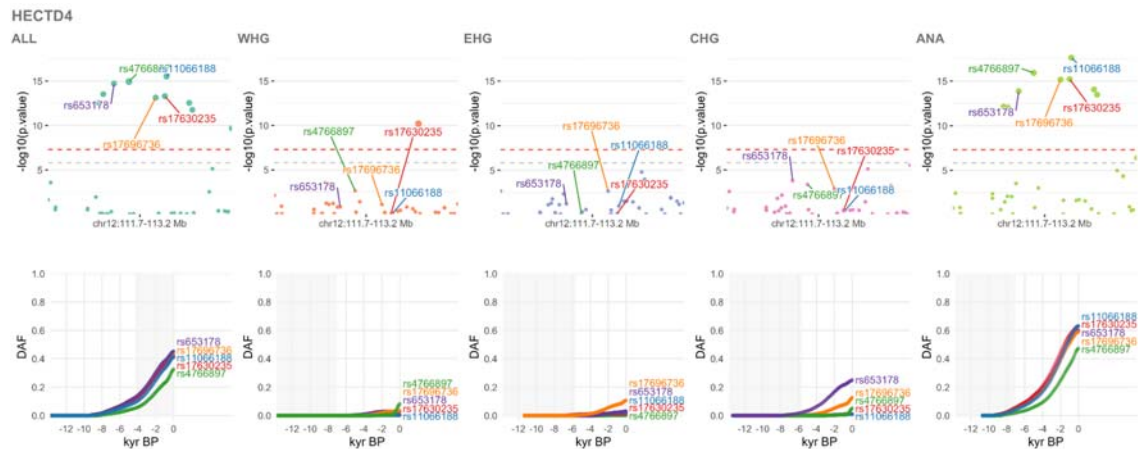

3155  
3156  
3157  
3158  
3159  
3160  
3161

**Figure S4a.33.** Selection at the *HECTD4* locus, spanning chr12:111706879-113205500. Results for the pan-ancestry analysis (ALL) plus the four marginal ancestries: Western hunter-gatherers (WHG), Eastern hunter-gatherers (EHG), Caucasus hunter-gatherers (CHG) and Anatolian farmers (ANA). Row one shows zoomed Manhattan plots of the p-values for each ancestry (significant SNPs sized by their selection coefficients), and row two shows allele trajectories for the top SNPs across all ancestries.

3162 This peak spanned the region chr12:111706879-113205500, with significant SNPs including:

- 3163 • rs11066188 (*HECTD4*; ANA;  $p=2.35e-18$ ;  $s=0.0202$ ), associated with Celiac disease and
- 3164 Rheumatoid arthritis <sup>48</sup>.
- 3165 • rs4766897 (*ACAD10*; ANA;  $p=1.17e-16$ ;  $s=0.0208$ ), associated with Fibrinogen levels <sup>123</sup>.
- 3166 • rs17630235 (*TRAFD1 - HECTD4*; ANA;  $p=5.98e-16$ ;  $s=0.0195$ ), associated with Body
- 3167 mass index; Diastolic blood pressure; Parental longevity (combined parental attained
- 3168 age, Martingale residuals); Systolic blood pressure; Tonsillectomy <sup>39,42,124–126</sup>.
- 3169 • rs17696736 (*NAA25*; ANA;  $p=6.77e-16$ ;  $s=0.0196$ ), associated with Coronary artery
- 3170 disease; Diastolic blood pressure x alcohol consumption interaction (2df test); Estimated
- 3171 glomerular filtration rate; Mean arterial pressure; Mean arterial pressure x alcohol
- 3172 consumption interaction (2df test); Parental longevity (combined parental attained age,
- 3173 Martingale residuals); Systolic blood pressure x alcohol consumption interaction (2df
- 3174 test); Type 1 diabetes; Urate levels <sup>91,126–133</sup>.
- 3175 • rs653178 (*ATXN2*; ALL;  $p=1.92e-15$ ;  $s=0.0194$ ), associated with Allergic disease
- 3176 (asthma, hay fever or eczema); Asthma; Blood pressure; Celiac disease; Celiac disease
- 3177 or Rheumatoid arthritis; Chronic kidney disease; Diastolic blood pressure; Eczema;
- 3178 Eosinophil counts; Eosinophil percentage of granulocytes; Eosinophil percentage of white
- 3179 cells; Hay fever and/or eczema; Inflammatory bowel disease; LDL cholesterol; Mean
- 3180 arterial pressure; Monocyte count; Myocardial infarction; Neutrophil percentage of
- 3181 granulocytes; Sarcoidosis; Sum eosinophil basophil counts; Systemic lupus
- 3182 erythematosus; Thyroid peroxidase antibody positivity; Tonsillectomy; Total cholesterol
- 3183 levels; Type 1 diabetes; Urate levels <sup>58,82,83,104,125,130,134–148</sup>.

3184

3185 Peak 16: RFLNA

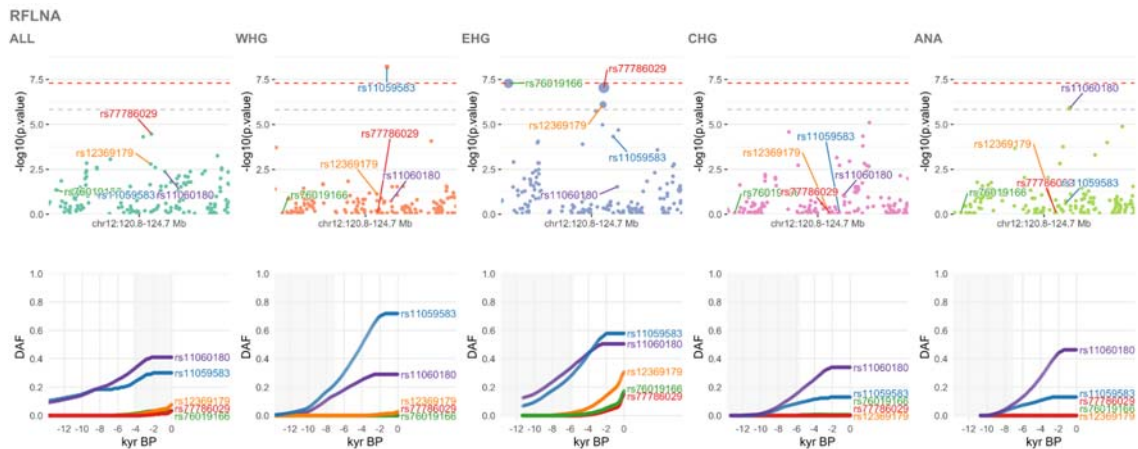

3186  
3187  
3188  
3189  
3190  
3191  
3192

**Figure S4a.34.** Selection at the *RFLNA* locus, spanning chr12:120813919-124667680. Results for the pan-ancestry analysis (ALL) plus the four marginal ancestries: Western hunter-gatherers (WHG), Eastern hunter-gatherers (EHG), Caucasus hunter-gatherers (CHG) and Anatolian farmers (ANA). Row one shows zoomed Manhattan plots of the p-values for each ancestry (significant SNPs sized by their selection coefficients), and row two shows allele trajectories for the top SNPs across all ancestries.

3193 This peak spanned the region chr12:120813919-124667680, with significant SNPs including:

- 3194 ● rs11059583 (*HCAR3 - HCAR1*; WHG;  $p=6.21e-09$ ;  $s=0.0144$ ), associated with Waist-to-
- 3195 hip ratio adjusted for BMI <sup>72</sup>.
- 3196 ● rs76019166 (*PXN*; EHG;  $p=5.20e-08$ ;  $s=0.0339$ ), associated with Appendicular lean
- 3197 mass <sup>149</sup>.
- 3198 ● rs77786029 (*ZCCHC8*; EHG;  $p=9.02e-08$ ;  $s=0.0399$ ), associated with Red cell
- 3199 distribution width <sup>58</sup>.
- 3200 ● rs12369179 (*ZCCHC8*; EHG;  $p=7.96e-07$ ;  $s=0.0239$ ), associated with Body mass index;
- 3201 Waist-to-hip ratio adjusted for BMI <sup>72,150</sup>.
- 3202 ● rs11060180 (*CCDC62*; ANA;  $p=1.27e-06$ ;  $s=0.0146$ ), associated with Parkinson's
- 3203 disease <sup>151-153</sup>.

3204

3205 Peak 17: MARK3

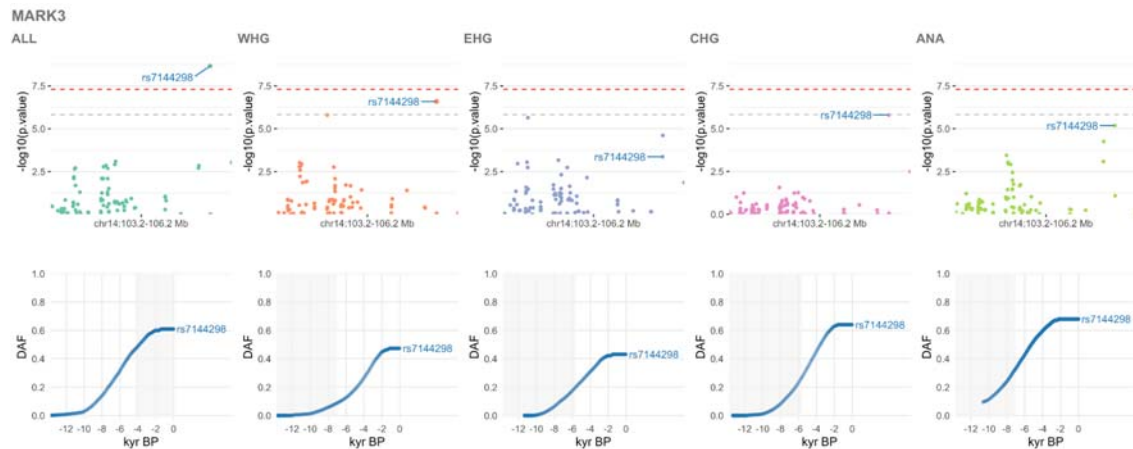

3206

3207 **Figure S4a.35.** Selection at the *MARK3* locus, spanning chr14:103239629-106248400. Results for  
 3208 the pan-ancestry analysis (ALL) plus the four marginal ancestries: Western hunter-gatherers (WHG),  
 3209 Eastern hunter-gatherers (EHG), Caucasus hunter-gatherers (CHG) and Anatolian farmers (ANA).  
 3210 Row one shows zoomed Manhattan plots of the p-values for each ancestry (significant SNPs sized by  
 3211 their selection coefficients), and row two shows allele trajectories for the top SNPs across all  
 3212 ancestries.

3213 This peak spanned the region chr14:103239629-106248400, with significant SNPs including:

- 3214 • rs7144298 (*IGHG3* - *AL122127.1*; ALL; p=2.19e-09; s=0.0122), associated with Blood  
 3215 protein levels <sup>40</sup>.

3216

3217 Peak 18: SEMA6D

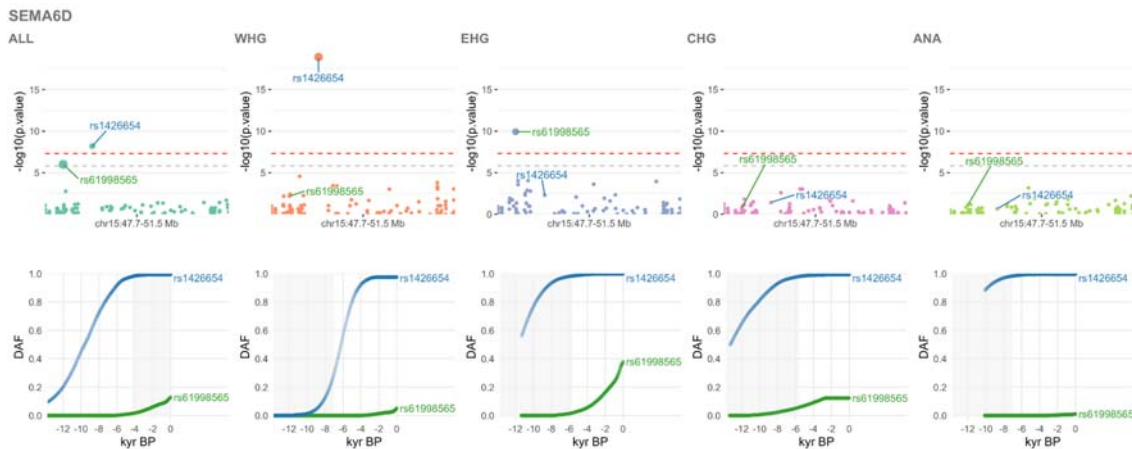

3218

3219

**Figure S4a.36.** Selection at the *SEMA6D* locus, spanning chr15:47665179-51534060. Results for the

3220

pan-ancestry analysis (ALL) plus the four marginal ancestries: Western hunter-gatherers (WHG),

3221

Eastern hunter-gatherers (EHG), Caucasus hunter-gatherers (CHG) and Anatolian farmers (ANA).

3222

Row one shows zoomed Manhattan plots of the p-values for each ancestry (significant SNPs sized by

3223

their selection coefficients), and row two shows allele trajectories for the top SNPs across all

3224

ancestries.

3225

This peak spanned the region chr15:47665179-51534060, with significant SNPs including:

3226

- rs1426654 (*SLC24A5*; WHG;  $p=1.25e-19$ ;  $s=0.0305$ ), associated with Eye colour; Eye colour (brightness); Eye colour (saturation); Hair colour; Iris colour ( $b^*$  coordinate); Skin pigmentation; Skin reflectance (Melanin index); Skin, hair and eye pigmentation (multivariate analysis)<sup>76,78,80,154,155</sup>.

3227

3228

3229

- rs61998565 (*SEMA6D*, *AC023905.1*; EHG;  $p=1.19e-10$ ;  $s=0.023$ ), associated with Heel bone mineral density<sup>45,58,109</sup>.

3230

3231

3232

3233 Peak 19: CSK

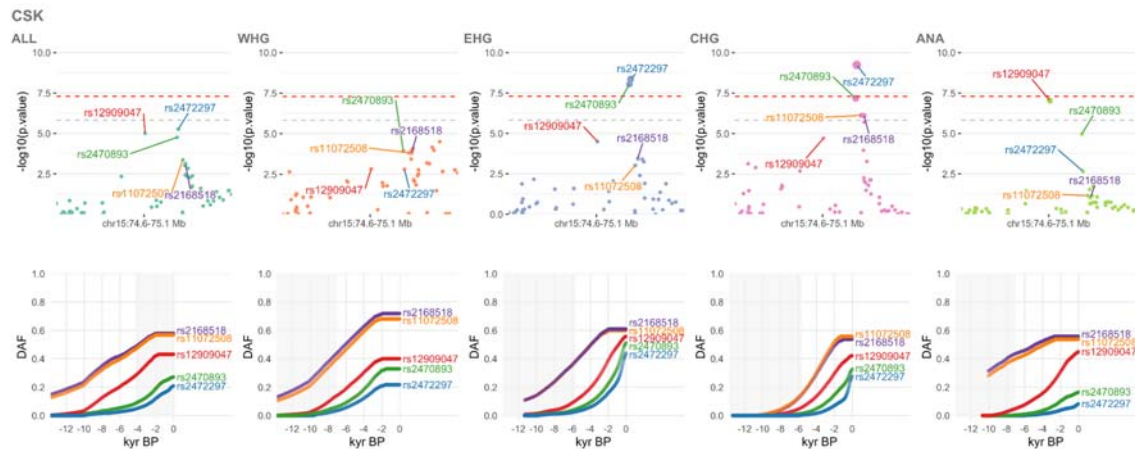

3234 **Figure S4a.37.** Selection at the CSK locus, spanning chr15:74607429-75101530. Results for the  
 3235 pan-ancestry analysis (ALL) plus the four marginal ancestries: Western hunter-gatherers (WHG),  
 3236 Eastern hunter-gatherers (EHG), Caucasus hunter-gatherers (CHG) and Anatolian farmers (ANA).  
 3237 Row one shows zoomed Manhattan plots of the p-values for each ancestry (significant SNPs sized by  
 3238 their selection coefficients), and row two shows allele trajectories for the top SNPs across all  
 3239 ancestries.  
 3240

3241 This peak spanned the region chr15:74607429-75101530, with significant SNPs including:

- 3242 • rs2472297 (*CYP1A1 - CYP1A2*; CHG;  $p=5.80e-10$ ;  $s=0.0304$ ), associated with Alcohol  
 3243 consumption (drinks per week); Alcohol consumption (drinks per week) (MTAG); Bitter  
 3244 beverage consumption; Bitter non-alcoholic beverage consumption; Caffeine metabolism  
 3245 (plasma 1,3,7-trimethylxanthine (caffeine) level); Caffeine metabolism (plasma 1,7-  
 3246 dimethylxanthine (paraxanthine) to 1,3,7-trimethylxanthine (caffeine) ratio); Coffee  
 3247 consumption; Coffee consumption (cups per day); Estimated glomerular filtration rate;  
 3248 Estimated glomerular filtration rate in non-diabetics; Plasma clozapine levels in treatment-  
 3249 resistant schizophrenia; Predicted visceral adipose tissue; Tea consumption; Urate  
 3250 levels; Urinary albumin excretion; Urinary albumin-to-creatinine ratio; Urinary potassium  
 3251 excretion; Urinary sodium excretion <sup>86,91,133,156–165</sup>.
- 3252 • rs2470893 (*CYP1A1 - CYP1A2*; EHG;  $p=8.93e-09$ ;  $s=0.0217$ ), associated with Blood  
 3253 urea nitrogen levels; Caffeine consumption; Caffeine metabolism (plasma 1,3,7-  
 3254 trimethylxanthine (caffeine) level); Caffeine metabolism (plasma 1,7-dimethylxanthine  
 3255 (paraxanthine) to 1,3,7-trimethylxanthine (caffeine) ratio); Coffee consumption;  
 3256 Microalbuminuria; Platelet distribution width; Urinary albumin excretion (no hypertensive  
 3257 medication); Urinary albumin-to-creatinine ratio <sup>83,133,157–159,166–168</sup>.
- 3258 • rs12909047 (*AC012435.2,AC012435.3,UBL7-AS1*; ANA;  $p=9.39e-08$ ;  $s=0.019$ ),  
 3259 associated with Caffeine metabolism (plasma 1,3,7-trimethylxanthine (caffeine) level);  
 3260 Caffeine metabolism (plasma 1,3-dimethylxanthine (theophylline) level) <sup>158</sup>.
- 3261 • rs11072508 (*CYP1A2 - CSK*; CHG;  $p=7.45e-07$ ;  $s=0.0163$ ), associated with  
 3262 Cardiovascular disease; Medication use (agents acting on the renin-angiotensin system)  
 3263 <sup>58,169</sup>.
- 3264 • rs2168518 (*MIR4513,CSK*; CHG;  $p=7.73e-07$ ;  $s=0.0163$ ), associated with Medication use  
 3265 (calcium channel blockers) <sup>169</sup>.

3266

3267 Peak 20: DPEP1

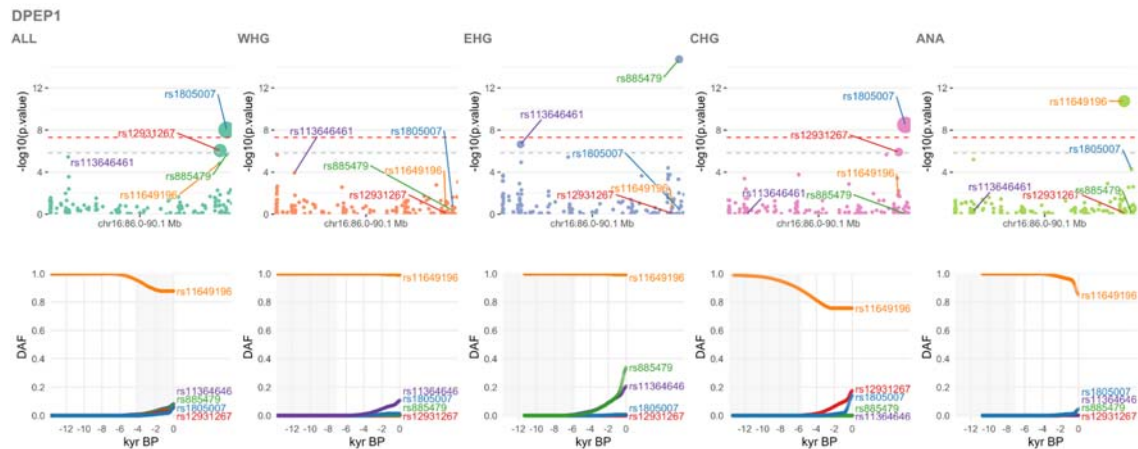

3268  
3269  
3270  
3271  
3272  
3273  
3274

**Figure S4a.38.** Selection at the *DPEP1* locus, spanning chr16:85972609-90084560. Results for the pan-ancestry analysis (ALL) plus the four marginal ancestries: Western hunter-gatherers (WHG), Eastern hunter-gatherers (EHG), Caucasus hunter-gatherers (CHG) and Anatolian farmers (ANA). Row one shows zoomed Manhattan plots of the p-values for each ancestry (significant SNPs sized by their selection coefficients), and row two shows allele trajectories for the top SNPs across all ancestries.

3275  
3276  
3277  
3278  
3279  
3280  
3281  
3282  
3283  
3284  
3285  
3286  
3287  
3288  
3289  
3290

This peak spanned the region chr16:85972609-90084560, with significant SNPs including:

- rs885479 (*AC092143.1,MC1R*; EHG;  $p=1.92e-15$ ;  $s=0.0284$ ), associated with Blond vs. brown/black hair colour <sup>57</sup>.
- rs11649196 (*ZNF276*; ANA;  $p=1.79e-11$ ;  $s=-0.0457$ ), associated with Keratinocyte cancer (MTAG) <sup>59</sup>.
- rs1805007 (*AC092143.1,MC1R*; CHG;  $p=3.22e-09$ ;  $s=0.0648$ ), associated with Balding type 1; Basal cell carcinoma; Blond vs. brown hair colour; Blond vs. brown/black hair colour; Brown vs. black hair colour; Cutaneous squamous cell carcinoma; Freckles; Hair colour; Hair morphology traits; Keratinocyte cancer (MTAG); Melanoma; Non-melanoma skin cancer; Red vs non-red hair colour; Red vs. brown/black hair colour; Skin pigmentation traits; Skin sensitivity to sun; Squamous cell carcinoma; Sunburns; Tanning 49–59.
- rs113646461 (*AC092723.5 - AC092723.4*; EHG;  $p=2.28e-07$ ;  $s=0.0273$ ), associated with Monocyte percentage of white cells <sup>83</sup>.
- rs12931267 (*FANCA*; ALL;  $p=8.87e-07$ ;  $s=0.0506$ ), associated with Freckling; Hair colour; Hair morphology traits; Skin pigmentation traits; Skin sensitivity to sun <sup>56,77,170</sup>.

3291

3292 Peak 21: MAPT

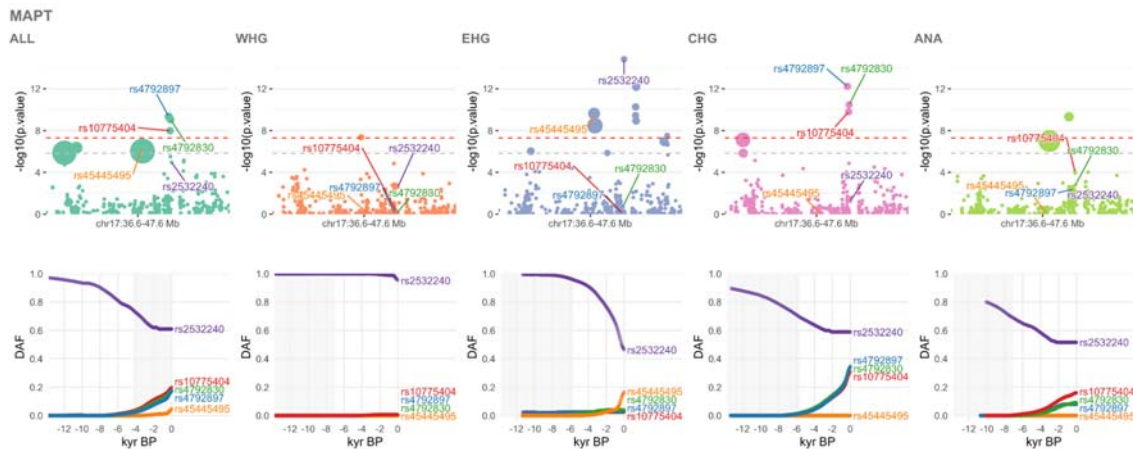

3293 **Figure S4a.39.** Selection at the *MAPT* locus, spanning chr17:36615969-47588760. Results for the  
 3294 pan-ancestry analysis (ALL) plus the four marginal ancestries: Western hunter-gatherers (WHG),  
 3295 Eastern hunter-gatherers (EHG), Caucasus hunter-gatherers (CHG) and Anatolian farmers (ANA).  
 3296 Row one shows zoomed Manhattan plots of the p-values for each ancestry (significant SNPs sized by  
 3297 their selection coefficients), and row two shows allele trajectories for the top SNPs across all  
 3298 ancestries.  
 3299

3300 This peak spanned the region chr17:36615969-47588760, with significant SNPs including:

- 3301 ● rs2532240 (*KANSL1*; EHG;  $p=1.51e-15$ ;  $s=-0.0217$ ), associated with White matter  
 3302 microstructure (axial diffusivities) <sup>171</sup>.
- 3303 ● rs4792897 (*MAPT*; CHG;  $p=5.94e-13$ ;  $s=0.0248$ ), associated with Snoring <sup>60</sup>.
- 3304 ● rs10775404 (*KANSL1*; CHG;  $p=1.60e-10$ ;  $s=0.0248$ ), associated with Reaction time <sup>74</sup>.
- 3305 ● rs45445495 (*SLC4A1*; EHG;  $p=2.34e-10$ ;  $s=0.0448$ ), associated with Appendicular lean  
 3306 mass <sup>149</sup>.

3307  
 3308  
 3309  
 3310



## 3311 Discussion

3312 Using our ancient genomic panel, we sought to identify phenotype-associated variants that  
3313 have evidence for directional selection over the last 13,000 years. To estimate allele  
3314 frequency trajectories and selection coefficients of trait-associated variants through time, we  
3315 used the software *CLUES*<sup>1</sup> which can perform inference of allele frequency trajectories  
3316 using marginal trees sampled from a reconstruction of an ancestral recombination graph  
3317 (ARG)<sup>2</sup> for a set of genomic sequences, in combination with genotype likelihoods from  
3318 serially sampled ancient DNA (aDNA).

3319

3320 Our results show that the incorporation of ancient DNA considerably improves our power to  
3321 detect variants under selection, compared to a method that only uses the ARG inferred from  
3322 present-day data alone. Using genomes from the 1,000 Genomes Project project  
3323 (populations GBR, FIN and TSI), we inferred allele trajectories and selection coefficients for  
3324 35,592 phenotype-associated variants, ascertained from the GWAS Catalog<sup>4</sup>, along with an  
3325 equal number of putatively neutral “control” variants. Our analysis identified no genome-wide  
3326 significant selective sweeps ( $p < 5e-8$ ) using present-day data alone. However, the trait-  
3327 associated variants were significantly enriched for evidence of selection when compared to  
3328 the control group (Wilcoxon signed-rank test,  $p < 2.2e-16$ ).

## 3329 Pan-ancestry selection

3330 In contrast to patterns observed in present-day genomes, our selection analysis based on a  
3331 time-series of ancient DNA genotype probabilities identified 11 genome-wide significant ( $p <$   
3332  $5e-8$ ) selective sweeps in the GWAS variants, and none in the control group; consistent with  
3333 widespread selection acting on trait-associated variants. This analysis confirms many of the  
3334 previously reported selection loci in West Eurasians, identified from present-day and ancient  
3335 DNA<sup>16,172–174</sup>, and reveals novel selective sweeps, while refining the temporal dynamics of  
3336 the selected alleles.

3337

3338 The strongest overall signal of selection in the pan-ancestry analysis is at the *LCT / MCM6*  
3339 locus (rs4988235;  $p=9.86e-31$ ;  $s=0.020$ ), the derived allele of which is casual for lactase  
3340 persistence<sup>35,36</sup>. The inferred trajectory indicates that this allele began rising in frequency c.  
3341 6,000 years ago, and has continued to rise in frequency up to the present (Supplementary  
3342 Figure S4a.5).

3343

3344 We find a strong signal of selection at the *FADS1* (rs174546;  $p=2.65e-10$ ;  $s=0.013$ ) and  
3345 *FADS2* (rs174581;  $p=1.87e-10$ ;  $s=0.013$ ) locus, associated with fatty acid metabolism

3346 <sup>116,118,121,175–177</sup>. The trajectories for these variants indicate a rise in frequency, beginning  
3347 around 13,000 years ago, and continuing up until c. 2,000 years ago, after which their  
3348 frequencies plateaued (Supplementary Figure S4a.11). In contrast to earlier findings <sup>16</sup>, we  
3349 do not detect a significant signal of selection at the *DHCR7* and *NADSYN1* locus, associated  
3350 with vitamin D levels (most significant SNP rs4423214;  $p=5.54e-03$ ;  $s=-0.006$ ).

3351

3352 We detect an 8 megabase (Mb) wide selection sweep signal in chromosome 6 (chr6:25.2-  
3353 33.5 Mb), spanning the human leukocyte antigen (HLA) region. The selection trajectories of  
3354 the variants within this locus support multiple independent sweeps, occurring at different  
3355 times and with differing intensities. The strongest signal of selection at this locus in the pan-  
3356 ancestry analysis is at an intergenic variant, located between *HLA-A* and *HLA-W*  
3357 (rs7747253;  $p=8.86e-17$ ;  $s=-0.018$ ), associated with heel bone mineral density <sup>45</sup>, the derived  
3358 allele of which rapidly reduced in frequency, beginning c. 8,000 years ago (Supplementary  
3359 Figure S4a.10). In contrast, the signal of selection at *C2* (rs9267677;  $p=9.82e-14$ ;  $s=$   
3360  $0.04463$ ), also found within this sweep, and associated with educational attainment <sup>66</sup>, shows  
3361 a gradual increase in frequency beginning c. 4,000 years ago, before rising more rapidly c.  
3362 1,000 years ago; highlighting the complex temporal dynamics of selection at the HLA locus.

3363

3364 We also identify selection signals at the *SLC22A4* (rs35260072;  $p=1.15e-10$ ;  $s=0.018$ ) and  
3365 *RAPGEF6* (rs11950815;  $p=1.82e-12$ ;  $s=0.021$ ) loci, associated with asthma <sup>148</sup> and itch  
3366 intensity from mosquito bites <sup>34</sup>, and find that these alleles have been steadily rising in  
3367 frequency, beginning c. 8,000 years ago (Supplementary Figure S4a.8). However, we find  
3368 that the frequency of rs1050152 plateaued c. 1,500 years ago, contrary to previous reports  
3369 suggesting a recent rise in frequency <sup>16</sup>. Similarly, we detect selection at the *HECTD4*  
3370 (rs11066188;  $p=3.02e-16$ ;  $s=0.020$ ) and *ATXN2* (rs653178;  $p=1.92e-15$ ;  $s=0.019$ ) locus,  
3371 associated with celiac disease and rheumatoid arthritis <sup>48</sup>, which has been rising in frequency  
3372 for c. 9,000 years (Supplementary Figure S4a.12), also contrary to previous reports of a  
3373 more recent rise in frequency <sup>16</sup>.

3374

3375 We detect strong selection at the *SLC45A2* (rs35395;  $p=4.13e-23$ ;  $s=0.022$ ) locus,  
3376 associated with skin pigmentation <sup>76,178</sup>, and find that the selected allele began rising in  
3377 frequency c. 13,000 years ago, after which it plateaued at high frequency c. 2,000 years ago.  
3378 This is similar to the selection trajectory at the independent *GRM5* (rs7119749;  $p=8.54e-09$ ;  
3379  $s=0.011$ ) locus, which plateaued at medium-high frequency at approximately the same time.  
3380 We also detect strong selection at the *SLC24A5* (rs1426654;  $p=6.45e-09$ ;  $s=0.019$ ) locus,  
3381 and find that the selected allele, also associated with skin pigmentation <sup>76,154</sup>, began rising in  
3382 frequency even earlier than *SLC45A2*, and reached near fixation c. 3,500 years ago.

3383

3384 We further detect strong selection in an 11 Mb sweep in chromosome 17 (chr17:36.6-47.5),  
3385 spanning the 17q21.31 locus, a 900-kb inversion polymorphism<sup>179,180</sup>. The strongest signal  
3386 of selection in this sweep is at *MAPT* (rs4792897;  $p=4.65e-10$ ;  $s=0.03$ ), associated with  
3387 snoring<sup>60</sup>, the trajectory for which indicates a steady increase in frequency, beginning c.  
3388 7,000 years ago (Supplementary Figure S4a.14).

### 3389 Ancestry stratified selection trajectories

3390 To account for population structure in our samples, we also applied a novel chromosome  
3391 painting technique, based on inference of a sample's nearest neighbours in the marginal  
3392 trees of an ARG that contains individuals classified into different ancient populations  
3393 (Supplementary Note 3i). This method allows us to accurately assign ancestral population  
3394 labels to haplotypes found in both ancient and present-day individuals. By conditioning our  
3395 selection analyses on these haplotype backgrounds, we can infer the selection trajectories of  
3396 GWAS risk alleles in a manner that is approximately invariant to change in the admixture  
3397 proportions through time. These ancestry specific allele trajectories reveal many novel  
3398 aspects about the dynamic interplay between selection and admixture in West Eurasia  
3399 throughout the Holocene. We find that the allele trajectories of directionally selected sites  
3400 become much more apparent once we perform this ancestry partitioning. We often find  
3401 variants with strong allele frequency changes in one ancestral population but not another,  
3402 and analysing all ancient individuals without accounting for their ancestry composition leads  
3403 to a decrease in our ability to identify selected variants, and a blurring of the temporal signal  
3404 of allele frequency changes.

3405

3406 When conditioned on one of our four marginal ancestries—Western hunter-gatherers  
3407 (WHG), Eastern hunter-gatherers (EHG), Caucasus hunter-gatherers (CHG) and Anatolian  
3408 farmers (ANA)—we find 21 genome-wide significant selection peaks (substantially more than  
3409 in our pan-ancestry analysis), indicating that admixture between ancestral populations has  
3410 masked evidence of selection at many loci. Furthermore, we find that some strong signals of  
3411 selection identified in the pan-ancestry analysis are driven by sweeps in the marginal  
3412 ancestries which substantially differ in their most significant SNPs, suggesting that multiple  
3413 selected alleles may be common within genome-wide significant sweep loci.

3414

3415 For example, in the pan-ancestry analysis, the sweep at *MCM6* is led by rs4988235,  
3416 consistent with the widespread interpretation that selection has acted upon the lactase  
3417 persistence phenotype. However, in the ancestry stratified analysis, this selection signal is  
3418 primarily driven by sweeps in the EHG and CHG ancestral backgrounds, which differ in their

3419 most significant SNPs ([Supplementary Figure S4a.21](#)). The strongest sweep signal in all  
3420 marginal ancestries at this locus is in the EHG background; however, conditional on that  
3421 background, rs1246580 (*R3HDM1*) is the most significant SNP (associated with blood  
3422 protein levels<sup>40</sup> and mosquito bite size<sup>34</sup>). In CHG, rs4988235 is the most significant SNP,  
3423 but there is no evidence for selection at rs1246580 in this background. Conversely, in WHG,  
3424 we find no evidence for selection at rs4988235, and instead find evidence for strong  
3425 selection at rs1246580 occurring in the last c. 2,000 years. Despite the highly studied nature  
3426 of this locus, a satisfactory explanation for the observed strength of selection has remained  
3427 elusive<sup>181–184</sup>.

3428

3429 In comparison, the sweep at the *SLC45A2* locus shows a much simpler pattern, in which all  
3430 marginal ancestries show broad agreement at this locus ([Supplementary Figure S4a.25](#)).  
3431 Where they differ lies primarily in the timing of their frequency rises. The ANA ancestry  
3432 background shows the earliest evidence for selection at *SLC45A2*, followed by EHG and  
3433 WHG, beginning around c. 10,000 years ago, and CHG c. 2,000 years later. In all ancestry  
3434 backgrounds except WHG, the selected haplotypes reach near fixation by c. 3,000 years  
3435 ago, whilst the WHG haplotype background contains the majority of the ancestral alleles still  
3436 segregating in present-day Europeans.

3437

3438 At the *FADS2* locus, the strong signal of selection in the pan-ancestry analysis is driven  
3439 primarily by a sweep occurring on the EHG haplotypic background. Interestingly, we find no  
3440 evidence for selection at this locus in the WHG background, and most of the frequency rise  
3441 in the EHG background occurs after their admixture with CHG, where the selected alleles  
3442 were already at close to present-day frequencies.

3443

## 3444 References

- 3445 1. Stern, A. J., Wilton, P. R. & Nielsen, R. An approximate full-likelihood method for  
3446 inferring selection and allele frequency trajectories from DNA sequence data. *PLoS*  
3447 *Genet.* **15**, e1008384 (2019).
- 3448 2. Speidel, L., Forest, M., Shi, S. & Myers, S. R. A method for genome-wide genealogy  
3449 estimation for thousands of samples. *Nat. Genet.* **51**, 1321–1329 (2019).
- 3450 3. Köster, J. & Rahmann, S. Snakemake--a scalable bioinformatics workflow engine.  
3451 *Bioinformatics* **28**, 2520–2522 (2012).

- 3452 4. Buniello, A. *et al.* The NHGRI-EBI GWAS Catalog of published genome-wide  
3453 association studies, targeted arrays and summary statistics 2019. *Nucleic Acids Res.*  
3454 **47**, D1005–D1012 (2019).
- 3455 5. Jupp, S., Burdett, T., Leroy, C. & Parkinson, H. E. A new Ontology Lookup Service at  
3456 EMBL-EBI. in *SWAT4LS* 118–119 (ceur-ws.org, 2015).
- 3457 6. Yates, A. *et al.* The Ensembl REST API: Ensembl Data for Any Language.  
3458 *Bioinformatics* **31**, 143–145 (2015).
- 3459 7. Aken, B. L. *et al.* The Ensembl gene annotation system. *Database* **2016**, (2016).
- 3460 8. Kelleher, J., Etheridge, A. M. & McVean, G. Efficient Coalescent Simulation and  
3461 Genealogical Analysis for Large Sample Sizes. *PLoS Comput. Biol.* **12**, e1004842  
3462 (2016).
- 3463 9. 1000 Genomes Project Consortium *et al.* A global reference for human genetic  
3464 variation. *Nature* **526**, 68–74 (2015).
- 3465 10. Vilella, A. J. *et al.* EnsemblCompara GeneTrees: Complete, duplication-aware  
3466 phylogenetic trees in vertebrates. *Genome Res.* **19**, 327–335 (2009).
- 3467 11. Rasmussen, M. D., Hubisz, M. J., Gronau, I. & Siepel, A. Genome-wide  
3468 inference of ancestral recombination graphs. *PLoS Genet.* **10**, e1004342 (2014).
- 3469 12. Hein, J., Schierup, M. & Wiuf, C. *Gene Genealogies, Variation and Evolution:*  
3470 *A primer in coalescent theory.* (Oxford University Press, USA, 2004).
- 3471 13. Stern, A. J., Speidel, L., Zaitlen, N. A. & Nielsen, R. Disentangling selection  
3472 on genetically correlated polygenic traits via whole-genome genealogies. *Am. J. Hum.*  
3473 *Genet.* (2021) doi:10.1016/j.ajhg.2020.12.005.
- 3474 14. 1000 Genomes Project Consortium *et al.* A map of human genome variation  
3475 from population-scale sequencing. *Nature* **467**, 1061–1073 (2010).
- 3476 15. Haller, T., Tasa, T. & Metspalu, A. Manhattan Harvester and Cropper: a  
3477 system for GWAS peak detection. *BMC Bioinformatics* **20**, 22 (2019).
- 3478 16. Mathieson, I. *et al.* Genome-wide patterns of selection in 230 ancient  
3479 Eurasians. *Nature* **528**, 499–503 (2015).

- 3480 17. Li, H. A statistical framework for SNP calling, mutation discovery, association  
3481 mapping and population genetical parameter estimation from sequencing data.  
3482 *Bioinformatics* **27**, 2987–2993 (2011).
- 3483 18. Quinlan, A. R. & Hall, I. M. BEDTools: a flexible suite of utilities for comparing  
3484 genomic features. *Bioinformatics* **26**, 841–842 (2010).
- 3485 19. Cock, P. J. A. *et al.* Biopython: freely available Python tools for computational  
3486 molecular biology and bioinformatics. *Bioinformatics* **25**, 1422–1423 (2009).
- 3487 20. Anaconda Software Distribution. *Anaconda Documentation* (2020).
- 3488 21. Harris, C. R. *et al.* Array programming with NumPy. *Nature* **585**, 357–362  
3489 (2020).
- 3490 22. McKinney, W. & Others. Data structures for statistical computing in python. in  
3491 *Proceedings of the 9th Python in Science Conference* vol. 445 51–56 (Austin, TX,  
3492 2010).
- 3493 23. Li, H. *et al.* The Sequence Alignment/Map format and SAMtools.  
3494 *Bioinformatics* **25**, 2078–2079 (2009).
- 3495 24. Van Rossum, G. & Drake, F. L. *Python 3 Reference Manual: (Python*  
3496 *Documentation Manual Part 2)*. (CreateSpace Independent Publishing Platform, 2009).
- 3497 25. R Core Team. R: A Language and Environment for Statistical Computing.  
3498 (2019).
- 3499 26. Haider, S. *et al.* A bedr way of genomic interval processing. *Source Code Biol.*  
3500 *Med.* **11**, 14 (2016).
- 3501 27. Wickham, H., François, R., Henry, L. & Müller, K. dplyr: A Grammar of Data  
3502 Manipulation. (2019).
- 3503 28. Wickham, H. *ggplot2: Elegant Graphics for Data Analysis*. (Springer, 2016).
- 3504 29. Petukhov, V., van den Brand, T. & Biederstedt, E. ggrastr: Raster Layers for  
3505 ‘ggplot2’. (2020).
- 3506 30. Slowikowski, K. ggrepel: Automatically Position Non-Overlapping Text Labels  
3507 with ‘ggplot2’. (2020).

- 3508 31. Wilke, C. O. ggrridges: Ridgeline Plots in 'ggplot2'. (2018).
- 3509 32. Wickham, H. stringr: Simple, Consistent Wrappers for Common String  
3510 Operations. (2019).
- 3511 33. Virtanen, P. *et al.* SciPy 1.0: fundamental algorithms for scientific computing  
3512 in Python. *Nat. Methods* **17**, 261–272 (2020).
- 3513 34. Jones, A. V. *et al.* GWAS of self-reported mosquito bite size, itch intensity and  
3514 attractiveness to mosquitoes implicates immune-related predisposition loci. *Hum. Mol.*  
3515 *Genet.* **26**, 1391–1406 (2017).
- 3516 35. Enattah, N. S. *et al.* Identification of a variant associated with adult-type  
3517 hypolactasia. *Nat. Genet.* **30**, 233–237 (2002).
- 3518 36. Bersaglieri, T. *et al.* Genetic signatures of strong recent positive selection at  
3519 the lactase gene. *Am. J. Hum. Genet.* **74**, 1111–1120 (2004).
- 3520 37. Hill, W. D. *et al.* Genome-wide analysis identifies molecular systems and 149  
3521 genetic loci associated with income. *Nat. Commun.* **10**, 5741 (2019).
- 3522 38. Shungin, D. *et al.* New genetic loci link adipose and insulin biology to body fat  
3523 distribution. *Nature* **518**, 187–196 (2015).
- 3524 39. Winkler, T. W. *et al.* The Influence of Age and Sex on Genetic Associations  
3525 with Adult Body Size and Shape: A Large-Scale Genome-Wide Interaction Study. *PLoS*  
3526 *Genet.* **11**, e1005378 (2015).
- 3527 40. Sun, B. B. *et al.* Genomic atlas of the human plasma proteome. *Nature* **558**,  
3528 73–79 (2018).
- 3529 41. Emilsson, V. *et al.* Co-regulatory networks of human serum proteins link  
3530 genetics to disease. *Science* **361**, 769–773 (2018).
- 3531 42. Hoffmann, T. J. *et al.* A Large Multiethnic Genome-Wide Association Study of  
3532 Adult Body Mass Index Identifies Novel Loci. *Genetics* **210**, 499–515 (2018).
- 3533 43. Ahsan, M. *et al.* The relative contribution of DNA methylation and genetic  
3534 variants on protein biomarkers for human diseases. *PLoS Genet.* **13**, e1007005 (2017).
- 3535 44. Zhu, Z. *et al.* A genome-wide cross-trait analysis from UK Biobank highlights

3536 the shared genetic architecture of asthma and allergic diseases. *Nat. Genet.* **50**, 857–  
3537 864 (2018).

3538 45. Morris, J. A. *et al.* An atlas of genetic influences on osteoporosis in humans  
3539 and mice. *Nat. Genet.* **51**, 258–266 (2018).

3540 46. Hageaars, S. P. *et al.* Genetic prediction of male pattern baldness. *PLoS*  
3541 *Genet.* **13**, e1006594 (2017).

3542 47. Li, Y. *et al.* Genome-Wide Association Studies of Metabolites in Patients with  
3543 CKD Identify Multiple Loci and Illuminate Tubular Transport Mechanisms. *J. Am. Soc.*  
3544 *Nephrol.* **29**, 1513–1524 (2018).

3545 48. Gutierrez-Achury, J. *et al.* Functional implications of disease-specific variants  
3546 in loci jointly associated with coeliac disease and rheumatoid arthritis. *Hum. Mol. Genet.*  
3547 **25**, 180–190 (2016).

3548 49. Sulem, P. *et al.* Genetic determinants of hair, eye and skin pigmentation in  
3549 Europeans. *Nat. Genet.* **39**, 1443–1452 (2007).

3550 50. Nan, H. *et al.* Genome-wide association study identifies novel alleles  
3551 associated with risk of cutaneous basal cell carcinoma and squamous cell carcinoma.  
3552 *Hum. Mol. Genet.* **20**, 3718–3724 (2011).

3553 51. Zhang, M. *et al.* Genome-wide association studies identify several new loci  
3554 associated with pigmentation traits and skin cancer risk in European Americans. *Hum.*  
3555 *Mol. Genet.* **22**, 2948–2959 (2013).

3556 52. Chahal, H. S. *et al.* Genome-wide association study identifies novel  
3557 susceptibility loci for cutaneous squamous cell carcinoma. *Nat. Commun.* **7**, 12048  
3558 (2016).

3559 53. Chahal, H. S. *et al.* Genome-wide association study identifies 14 novel risk  
3560 alleles associated with basal cell carcinoma. *Nat. Commun.* **7**, 12510 (2016).

3561 54. Ransohoff, K. J. *et al.* Two-stage genome-wide association study identifies a  
3562 novel susceptibility locus associated with melanoma. *Oncotarget* **8**, 17586–17592  
3563 (2017).



- 3564 55. Hysi, P. G. *et al.* Genome-wide association meta-analysis of individuals of  
3565 European ancestry identifies new loci explaining a substantial fraction of hair color  
3566 variation and heritability. *Nat. Genet.* **50**, 652–656 (2018).
- 3567 56. Galván-Femenía, I. *et al.* Multitrait genome association analysis identifies new  
3568 susceptibility genes for human anthropometric variation in the GCAT cohort. *J. Med.*  
3569 *Genet.* **55**, 765–778 (2018).
- 3570 57. Morgan, M. D. *et al.* Genome-wide study of hair colour in UK Biobank explains  
3571 most of the SNP heritability. *Nat. Commun.* **9**, 5271 (2018).
- 3572 58. Kichaev, G. *et al.* Leveraging Polygenic Functional Enrichment to Improve  
3573 GWAS Power. *Am. J. Hum. Genet.* **104**, 65–75 (2019).
- 3574 59. Liyanage, U. E. *et al.* Combined analysis of keratinocyte cancers identifies  
3575 novel genome-wide loci. *Hum. Mol. Genet.* **28**, 3148–3160 (2019).
- 3576 60. Jansen, P. R. *et al.* Genome-wide analysis of insomnia in 1,331,010  
3577 individuals identifies new risk loci and functional pathways. *Nat. Genet.* **51**, 394–403  
3578 (2019).
- 3579 61. Akinkuolie, A. O. *et al.* Group IIA Secretory Phospholipase A2, Vascular  
3580 Inflammation, and Incident Cardiovascular Disease. *Arterioscler. Thromb. Vasc. Biol.*  
3581 **39**, 1182–1190 (2019).
- 3582 62. Hill, W. D. *et al.* A combined analysis of genetically correlated traits identifies  
3583 187 loci and a role for neurogenesis and myelination in intelligence. *Mol. Psychiatry* **24**,  
3584 169–181 (2019).
- 3585 63. Legge, S. E. *et al.* Association of Genetic Liability to Psychotic Experiences  
3586 With Neuropsychotic Disorders and Traits. *JAMA Psychiatry* **76**, 1256–1265 (2019).
- 3587 64. Okbay, A. *et al.* Genome-wide association study identifies 74 loci associated  
3588 with educational attainment. *Nature* **533**, 539–542 (2016).
- 3589 65. Savage, J. E. *et al.* Genome-wide association meta-analysis in 269,867  
3590 individuals identifies new genetic and functional links to intelligence. *Nat. Genet.* **50**,  
3591 912–919 (2018).

- 3592 66. Lee, J. J. *et al.* Gene discovery and polygenic prediction from a genome-wide  
3593 association study of educational attainment in 1.1 million individuals. *Nat. Genet.* **50**,  
3594 1112–1121 (2018).
- 3595 67. Li, M. *et al.* Genome-wide association study of 1,5-anhydroglucitol identifies  
3596 novel genetic loci linked to glucose metabolism. *Sci. Rep.* **7**, 2812 (2017).
- 3597 68. Schlosser, P. *et al.* Genetic studies of urinary metabolites illuminate  
3598 mechanisms of detoxification and excretion in humans. *Nat. Genet.* **52**, 167–176  
3599 (2020).
- 3600 69. Tikkanen, E. *et al.* Biological Insights Into Muscular Strength: Genetic  
3601 Findings in the UK Biobank. *Sci. Rep.* **8**, 6451 (2018).
- 3602 70. Jones, S. E. *et al.* Genome-wide association analyses of chronotype in  
3603 697,828 individuals provides insights into circadian rhythms. *Nat. Commun.* **10**, 343  
3604 (2019).
- 3605 71. Ahola-Olli, A. V. *et al.* Genome-wide Association Study Identifies 27 Loci  
3606 Influencing Concentrations of Circulating Cytokines and Growth Factors. *Am. J. Hum.*  
3607 *Genet.* **100**, 40–50 (2017).
- 3608 72. Zhu, Z. *et al.* Shared genetic and experimental links between obesity-related  
3609 traits and asthma subtypes in UK Biobank. *J. Allergy Clin. Immunol.* **145**, 537–549  
3610 (2020).
- 3611 73. Yap, C. X. *et al.* Dissection of genetic variation and evidence for pleiotropy in  
3612 male pattern baldness. *Nat. Commun.* **9**, 5407 (2018).
- 3613 74. Davies, G. *et al.* Study of 300,486 individuals identifies 148 independent  
3614 genetic loci influencing general cognitive function. *Nat. Commun.* **9**, 2098 (2018).
- 3615 75. Zhao, B. *et al.* Genome-wide association analysis of 19,629 individuals  
3616 identifies variants influencing regional brain volumes and refines their genetic co-  
3617 architecture with cognitive and mental health traits. *Nat. Genet.* **51**, 1637–1644 (2019).
- 3618 76. Lona-Durazo, F. *et al.* Meta-analysis of GWA studies provides new insights on  
3619 the genetic architecture of skin pigmentation in recently admixed populations. *BMC*

3620 *Genet.* **20**, 59 (2019).

3621 77. Liu, F. *et al.* Genetics of skin color variation in Europeans: genome-wide  
3622 association studies with functional follow-up. *Hum. Genet.* **134**, 823–835 (2015).

3623 78. Adhikari, K. *et al.* A genome-wide association scan in admixed Latin  
3624 Americans identifies loci influencing facial and scalp hair features. *Nat. Commun.* **7**,  
3625 10815 (2016).

3626 79. Han, J. *et al.* A genome-wide association study identifies novel alleles  
3627 associated with hair color and skin pigmentation. *PLoS Genet.* **4**, e1000074 (2008).

3628 80. Adhikari, K. *et al.* A GWAS in Latin Americans highlights the convergent  
3629 evolution of lighter skin pigmentation in Eurasia. *Nat. Commun.* **10**, 358 (2019).

3630 81. Nan, H. *et al.* Genome-wide association study of tanning phenotype in a  
3631 population of European ancestry. *J. Invest. Dermatol.* **129**, 2250–2257 (2009).

3632 82. Liu, J. Z. *et al.* Association analyses identify 38 susceptibility loci for  
3633 inflammatory bowel disease and highlight shared genetic risk across populations. *Nat.*  
3634 *Genet.* **47**, 979–986 (2015).

3635 83. Astle, W. J. *et al.* The Allelic Landscape of Human Blood Cell Trait Variation  
3636 and Links to Common Complex Disease. *Cell* **167**, 1415–1429.e19 (2016).

3637 84. Shin, S.-Y. *et al.* An atlas of genetic influences on human blood metabolites.  
3638 *Nat. Genet.* **46**, 543–550 (2014).

3639 85. Kristjansson, R. P. *et al.* A loss-of-function variant in ALOX15 protects against  
3640 nasal polyps and chronic rhinosinusitis. *Nat. Genet.* **51**, 267–276 (2019).

3641 86. Hellwege, J. N. *et al.* Mapping eGFR loci to the renal transcriptome and  
3642 phenome in the VA Million Veteran Program. *Nat. Commun.* **10**, 3842 (2019).

3643 87. Graham, S. E. *et al.* Sex-specific and pleiotropic effects underlying kidney  
3644 function identified from GWAS meta-analysis. *Nat. Commun.* **10**, 1847 (2019).

3645 88. Franke, A. *et al.* Sequence variants in IL10, ARPC2 and multiple other loci  
3646 contribute to ulcerative colitis susceptibility. *Nat. Genet.* **40**, 1319–1323 (2008).

3647 89. UK IBD Genetics Consortium *et al.* Genome-wide association study of

3648 ulcerative colitis identifies three new susceptibility loci, including the HNF4A region. *Nat.*  
3649 *Genet.* **41**, 1330–1334 (2009).

3650 90. Lee, H.-S. *et al.* An Intergenic Variant rs9268877 Between HLA-DRA and  
3651 HLA-DRB Contributes to the Clinical Course and Long-term Outcome of Ulcerative  
3652 Colitis. *J. Crohns. Colitis* **12**, 1113–1121 (2018).

3653 91. Tin, A. *et al.* Target genes, variants, tissues and transcriptional pathways  
3654 influencing human serum urate levels. *Nat. Genet.* **51**, 1459–1474 (2019).

3655 92. Cipriani, V. *et al.* Genome-wide association study of age-related macular  
3656 degeneration identifies associated variants in the TNXB-FKBPL-NOTCH4 region of  
3657 chromosome 6p21.3. *Hum. Mol. Genet.* **21**, 4138–4150 (2012).

3658 93. Weidinger, S. *et al.* A genome-wide association study of atopic dermatitis  
3659 identifies loci with overlapping effects on asthma and psoriasis. *Hum. Mol. Genet.* **22**,  
3660 4841–4856 (2013).

3661 94. Hill, W. D. *et al.* Genetic contributions to two special factors of neuroticism are  
3662 associated with affluence, higher intelligence, better health, and longer life. *Mol.*  
3663 *Psychiatry* **25**, 3034–3052 (2020).

3664 95. Luciano, M. *et al.* Association analysis in over 329,000 individuals identifies  
3665 116 independent variants influencing neuroticism. *Nat. Genet.* **50**, 6–11 (2018).

3666 96. Sung, Y. J. *et al.* A Large-Scale Multi-ancestry Genome-wide Study  
3667 Accounting for Smoking Behavior Identifies Multiple Significant Loci for Blood Pressure.  
3668 *Am. J. Hum. Genet.* **102**, 375–400 (2018).

3669 97. Wootton, R. E. *et al.* Evidence for causal effects of lifetime smoking on risk for  
3670 depression and schizophrenia: a Mendelian randomisation study. *Psychol. Med.* **50**,  
3671 2435–2443 (2020).

3672 98. Gao, X. R., Huang, H., Nannini, D. R., Fan, F. & Kim, H. Genome-wide  
3673 association analyses identify new loci influencing intraocular pressure. *Hum. Mol.*  
3674 *Genet.* **27**, 2205–2213 (2018).

3675 99. Khawaja, A. P. *et al.* Genome-wide analyses identify 68 new loci associated

3676 with intraocular pressure and improve risk prediction for primary open-angle glaucoma.  
3677 *Nat. Genet.* **50**, 778–782 (2018).

3678 100. Weiss, F. U. *et al.* Fucosyltransferase 2 (FUT2) non-secretor status and blood  
3679 group B are associated with elevated serum lipase activity in asymptomatic subjects,  
3680 and an increased risk for chronic pancreatitis: a genetic association study. *Gut* **64**, 646–  
3681 656 (2015).

3682 101. Lieb, W. *et al.* Genome-wide association study for endothelial growth factors.  
3683 *Circ. Cardiovasc. Genet.* **8**, 389–397 (2015).

3684 102. Folkersen, L. *et al.* Mapping of 79 loci for 83 plasma protein biomarkers in  
3685 cardiovascular disease. *PLoS Genet.* **13**, e1006706 (2017).

3686 103. Sabater-Lleal, M. *et al.* Genome-Wide Association Transethnic Meta-Analyses  
3687 Identifies Novel Associations Regulating Coagulation Factor VIII and von Willebrand  
3688 Factor Plasma Levels. *Circulation* **139**, 620–635 (2019).

3689 104. Klarin, D. *et al.* Genetics of blood lipids among ~300,000 multi-ethnic  
3690 participants of the Million Veteran Program. *Nat. Genet.* **50**, 1514–1523 (2018).

3691 105. Hoffmann, T. J. *et al.* A large electronic-health-record-based genome-wide  
3692 study of serum lipids. *Nat. Genet.* **50**, 401–413 (2018).

3693 106. Kanai, M. *et al.* Genetic analysis of quantitative traits in the Japanese  
3694 population links cell types to complex human diseases. *Nat. Genet.* **50**, 390–400  
3695 (2018).

3696 107. Bi, X. *et al.* Common genetic variants have associations with human cortical  
3697 brain regions and risk of schizophrenia. *Genet. Epidemiol.* **43**, 548–558 (2019).

3698 108. Surakka, I. *et al.* The impact of low-frequency and rare variants on lipid levels.  
3699 *Nat. Genet.* **47**, 589–597 (2015).

3700 109. Kim, S. K. Identification of 613 new loci associated with heel bone mineral  
3701 density and a polygenic risk score for bone mineral density, osteoporosis and fracture.  
3702 *PLoS One* **13**, e0200785 (2018).

3703 110. Wojcik, G. L. *et al.* Genetic analyses of diverse populations improves

3704 discovery for complex traits. *Nature* **570**, 514–518 (2019).

3705 111. Mozaffarian, D. *et al.* Genetic loci associated with circulating phospholipid  
3706 trans fatty acids: a meta-analysis of genome-wide association studies from the  
3707 CHARGE Consortium. *Am. J. Clin. Nutr.* **101**, 398–406 (2015).

3708 112. Dorajoo, R. *et al.* A genome-wide association study of n-3 and n-6 plasma  
3709 fatty acids in a Singaporean Chinese population. *Genes Nutr.* **10**, 53 (2015).

3710 113. Hu, Y. *et al.* Discovery and fine-mapping of loci associated with MUFAs  
3711 through trans-ethnic meta-analysis in Chinese and European populations. *J. Lipid Res.*  
3712 **58**, 974–981 (2017).

3713 114. Tabassum, R. *et al.* Genetic architecture of human plasma lipidome and its  
3714 link to cardiovascular disease. *Nat. Commun.* **10**, 4329 (2019).

3715 115. Teslovich, T. M. *et al.* Biological, clinical and population relevance of 95 loci  
3716 for blood lipids. *Nature* **466**, 707–713 (2010).

3717 116. Willer, C. J. *et al.* Discovery and refinement of loci associated with lipid levels.  
3718 *Nat. Genet.* **45**, 1274–1283 (2013).

3719 117. Draisma, H. H. M. *et al.* Genome-wide association study identifies novel  
3720 genetic variants contributing to variation in blood metabolite levels. *Nat. Commun.* **6**,  
3721 7208 (2015).

3722 118. Ligthart, S. *et al.* Bivariate genome-wide association study identifies novel  
3723 pleiotropic loci for lipids and inflammation. *BMC Genomics* **17**, 443 (2016).

3724 119. van Setten, J. *et al.* Genome-wide association meta-analysis of 30,000  
3725 samples identifies seven novel loci for quantitative ECG traits. *Eur. J. Hum. Genet.* **27**,  
3726 952–962 (2019).

3727 120. Bentley, A. R. *et al.* Multi-ancestry genome-wide gene-smoking interaction  
3728 study of 387,272 individuals identifies new loci associated with serum lipids. *Nat. Genet.*  
3729 **51**, 636–648 (2019).

3730 121. Gallois, A. *et al.* A comprehensive study of metabolite genetics reveals strong  
3731 pleiotropy and heterogeneity across time and context. *Nat. Commun.* **10**, 4788 (2019).

- 3732 122. Olafsdottir, T. A. *et al.* Eighty-eight variants highlight the role of T cell  
3733 regulation and airway remodeling in asthma pathogenesis. *Nat. Commun.* **11**, 393  
3734 (2020).
- 3735 123. de Vries, P. S. *et al.* Comparison of HapMap and 1000 Genomes Reference  
3736 Panels in a Large-Scale Genome-Wide Association Study. *PLoS One* **12**, e0167742  
3737 (2017).
- 3738 124. Hoffmann, T. J. *et al.* Genome-wide association analyses using electronic  
3739 health records identify new loci influencing blood pressure variation. *Nat. Genet.* **49**,  
3740 54–64 (2017).
- 3741 125. Tian, C. *et al.* Genome-wide association and HLA region fine-mapping studies  
3742 identify susceptibility loci for multiple common infections. *Nat. Commun.* **8**, 599 (2017).
- 3743 126. Pilling, L. C. *et al.* Human longevity: 25 genetic loci associated in 389,166 UK  
3744 biobank participants. *Aging* **9**, 2504–2520 (2017).
- 3745 127. Todd, J. A. *et al.* Robust associations of four new chromosome regions from  
3746 genome-wide analyses of type 1 diabetes. *Nat. Genet.* **39**, 857–864 (2007).
- 3747 128. Wellcome Trust Case Control Consortium. Genome-wide association study of  
3748 14,000 cases of seven common diseases and 3,000 shared controls. *Nature* **447**, 661–  
3749 678 (2007).
- 3750 129. Cooper, J. D. *et al.* Meta-analysis of genome-wide association study data  
3751 identifies additional type 1 diabetes risk loci. *Nat. Genet.* **40**, 1399–1401 (2008).
- 3752 130. Liu, C. *et al.* Meta-analysis identifies common and rare variants influencing  
3753 blood pressure and overlapping with metabolic trait loci. *Nat. Genet.* **48**, 1162–1170  
3754 (2016).
- 3755 131. Feitosa, M. F. *et al.* Novel genetic associations for blood pressure identified  
3756 via gene-alcohol interaction in up to 570K individuals across multiple ancestries. *PLoS*  
3757 *One* **13**, e0198166 (2018).
- 3758 132. Zhou, W. *et al.* Efficiently controlling for case-control imbalance and sample  
3759 relatedness in large-scale genetic association studies. *Nat. Genet.* **50**, 1335–1341

3760 (2018).

3761 133. Wuttke, M. *et al.* A catalog of genetic loci associated with kidney function from  
3762 analyses of a million individuals. *Nat. Genet.* **51**, 957–972 (2019).

3763 134. Newton-Cheh, C. *et al.* Genome-wide association study identifies eight loci  
3764 associated with blood pressure. *Nat. Genet.* **41**, 666–676 (2009).

3765 135. Dubois, P. C. A. *et al.* Multiple common variants for celiac disease influencing  
3766 immune gene expression. *Nat. Genet.* **42**, 295–302 (2010).

3767 136. Köttgen, A. *et al.* New loci associated with kidney function and chronic kidney  
3768 disease. *Nat. Genet.* **42**, 376–384 (2010).

3769 137. Zhernakova, A. *et al.* Meta-analysis of genome-wide association studies in  
3770 celiac disease and rheumatoid arthritis identifies fourteen non-HLA shared loci. *PLoS*  
3771 *Genet.* **7**, e1002004 (2011).

3772 138. Wain, L. V. *et al.* Genome-wide association study identifies six new loci  
3773 influencing pulse pressure and mean arterial pressure. *Nat. Genet.* **43**, 1005–1011  
3774 (2011).

3775 139. Köttgen, A. *et al.* Genome-wide association analyses identify 18 new loci  
3776 associated with serum urate concentrations. *Nat. Genet.* **45**, 145–154 (2013).

3777 140. Medici, M. *et al.* Identification of novel genetic Loci associated with thyroid  
3778 peroxidase antibodies and clinical thyroid disease. *PLoS Genet.* **10**, e1004123 (2014).

3779 141. Onengut-Gumuscu, S. *et al.* Fine mapping of type 1 diabetes susceptibility  
3780 loci and evidence for colocalization of causal variants with lymphoid gene enhancers.  
3781 *Nat. Genet.* **47**, 381–386 (2015).

3782 142. Fischer, A. *et al.* Identification of Immune-Relevant Factors Conferring  
3783 Sarcoidosis Genetic Risk. *Am. J. Respir. Crit. Care Med.* **192**, 727–736 (2015).

3784 143. Nikpay, M. *et al.* A comprehensive 1,000 Genomes-based genome-wide  
3785 association meta-analysis of coronary artery disease. *Nat. Genet.* **47**, 1121–1130  
3786 (2015).

3787 144. Kato, N. *et al.* Trans-ancestry genome-wide association study identifies 12



3788 genetic loci influencing blood pressure and implicates a role for DNA methylation. *Nat.*  
3789 *Genet.* **47**, 1282–1293 (2015).

3790 145. de Lange, K. M. *et al.* Genome-wide association study implicates immune  
3791 activation of multiple integrin genes in inflammatory bowel disease. *Nat. Genet.* **49**,  
3792 256–261 (2017).

3793 146. Langefeld, C. D. *et al.* Transancestral mapping and genetic load in systemic  
3794 lupus erythematosus. *Nat. Commun.* **8**, 16021 (2017).

3795 147. Johansson, Å., Rask-Andersen, M., Karlsson, T. & Ek, W. E. Genome-wide  
3796 association analysis of 350 000 Caucasians from the UK Biobank identifies novel loci  
3797 for asthma, hay fever and eczema. *Hum. Mol. Genet.* **28**, 4022–4041 (2019).

3798 148. Han, Y. *et al.* Genome-wide analysis highlights contribution of immune system  
3799 pathways to the genetic architecture of asthma. *Nat. Commun.* **11**, 1776 (2020).

3800 149. Hernandez Cordero, A. I. *et al.* Genome-wide Associations Reveal Human-  
3801 Mouse Genetic Convergence and Modifiers of Myogenesis, CPNE1 and STC2. *Am. J.*  
3802 *Hum. Genet.* **105**, 1222–1236 (2019).

3803 150. Pulit, S. L. *et al.* Meta-analysis of genome-wide association studies for body  
3804 fat distribution in 694 649 individuals of European ancestry. *Hum. Mol. Genet.* **28**, 166–  
3805 174 (2019).

3806 151. Nalls, M. A. *et al.* Large-scale meta-analysis of genome-wide association data  
3807 identifies six new risk loci for Parkinson's disease. *Nat. Genet.* **46**, 989–993 (2014).

3808 152. Pickrell, J. K. *et al.* Detection and interpretation of shared genetic influences  
3809 on 42 human traits. *Nat. Genet.* **48**, 709–717 (2016).

3810 153. Chang, D. *et al.* A meta-analysis of genome-wide association studies  
3811 identifies 17 new Parkinson's disease risk loci. *Nat. Genet.* **49**, 1511–1516 (2017).

3812 154. Martin, A. R. *et al.* An Unexpectedly Complex Architecture for Skin  
3813 Pigmentation in Africans. *Cell* **171**, 1340–1353.e14 (2017).

3814 155. Jonnalagadda, M. *et al.* A Genome-Wide Association Study of Skin and Iris  
3815 Pigmentation among Individuals of South Asian Ancestry. *Genome Biol. Evol.* **11**,

3816 1066–1076 (2019).

3817 156. Sulem, P. *et al.* Sequence variants at CYP1A1-CYP1A2 and AHR associate  
3818 with coffee consumption. *Hum. Mol. Genet.* **20**, 2071–2077 (2011).

3819 157. Coffee and Caffeine Genetics Consortium *et al.* Genome-wide meta-analysis  
3820 identifies six novel loci associated with habitual coffee consumption. *Mol. Psychiatry* **20**,  
3821 647–656 (2015).

3822 158. Cornelis, M. C. *et al.* Genome-wide association study of caffeine metabolites  
3823 provides new insights to caffeine metabolism and dietary caffeine-consumption  
3824 behavior. *Hum. Mol. Genet.* **25**, 5472–5482 (2016).

3825 159. Haas, M. E. *et al.* Genetic Association of Albuminuria with Cardiometabolic  
3826 Disease and Blood Pressure. *Am. J. Hum. Genet.* **103**, 461–473 (2018).

3827 160. Liu, M. *et al.* Association studies of up to 1.2 million individuals yield new  
3828 insights into the genetic etiology of tobacco and alcohol use. *Nat. Genet.* **51**, 237–244  
3829 (2019).

3830 161. Zanetti, D. *et al.* Identification of 22 novel loci associated with urinary  
3831 biomarkers of albumin, sodium, and potassium excretion. *Kidney Int.* **95**, 1197–1208  
3832 (2019).

3833 162. Pardiñas, A. F. *et al.* Pharmacogenomic Variants and Drug Interactions  
3834 Identified Through the Genetic Analysis of Clozapine Metabolism. *Am. J. Psychiatry*  
3835 **176**, 477–486 (2019).

3836 163. Zhong, V. W. *et al.* A genome-wide association study of bitter and sweet  
3837 beverage consumption. *Hum. Mol. Genet.* **28**, 2449–2457 (2019).

3838 164. Pazoki, R. *et al.* GWAS for urinary sodium and potassium excretion highlights  
3839 pathways shared with cardiovascular traits. *Nat. Commun.* **10**, 3653 (2019).

3840 165. Karlsson, T. *et al.* Contribution of genetics to visceral adiposity and its relation  
3841 to cardiovascular and metabolic disease. *Nat. Med.* **25**, 1390–1395 (2019).

3842 166. Cornelis, M. C. *et al.* Genome-wide meta-analysis identifies regions on 7p21  
3843 (AHR) and 15q24 (CYP1A2) as determinants of habitual caffeine consumption. *PLoS*

3844 *Genet.* **7**, e1002033 (2011).

3845 167. Amin, N. *et al.* Genome-wide association analysis of coffee drinking suggests  
3846 association with CYP1A1/CYP1A2 and NRCAM. *Mol. Psychiatry* **17**, 1116–1129 (2012).

3847 168. Teumer, A. *et al.* Genome-wide association meta-analyses and fine-mapping  
3848 elucidate pathways influencing albuminuria. *Nat. Commun.* **10**, 4130 (2019).

3849 169. Wu, Y. *et al.* Genome-wide association study of medication-use and  
3850 associated disease in the UK Biobank. *Nat. Commun.* **10**, 1891 (2019).

3851 170. Eriksson, N. *et al.* Web-based, participant-driven studies yield novel genetic  
3852 associations for common traits. *PLoS Genet.* **6**, e1000993 (2010).

3853 171. Zhao, B. *et al.* Large-scale GWAS reveals genetic architecture of brain white  
3854 matter microstructure and genetic overlap with cognitive and mental health traits (n =  
3855 17,706). *Mol. Psychiatry* (2019) doi:10.1038/s41380-019-0569-z.

3856 172. Voight, B. F., Kudravalli, S., Wen, X. & Pritchard, J. K. A map of recent  
3857 positive selection in the human genome. *PLoS Biol.* **4**, e72 (2006).

3858 173. Sabeti, P. C. *et al.* Genome-wide detection and characterization of positive  
3859 selection in human populations. *Nature* **449**, 913–918 (2007).

3860 174. Pickrell, J. K. *et al.* Signals of recent positive selection in a worldwide sample  
3861 of human populations. *Genome Res.* **19**, 826–837 (2009).

3862 175. Buckley, M. T. *et al.* Selection in Europeans on Fatty Acid Desaturases  
3863 Associated with Dietary Changes. *Mol. Biol. Evol.* **34**, 1307–1318 (2017).

3864 176. Ye, K., Gao, F., Wang, D., Bar-Yosef, O. & Keinan, A. Dietary adaptation of  
3865 FADS genes in Europe varied across time and geography. *Nat Ecol Evol* **1**, 167 (2017).

3866 177. Mathieson, S. & Mathieson, I. FADS1 and the Timing of Human Adaptation to  
3867 Agriculture. *Mol. Biol. Evol.* **35**, 2957–2970 (2018).

3868 178. Ju, D. & Mathieson, I. The evolution of skin pigmentation-associated variation  
3869 in West Eurasia. *Proc. Natl. Acad. Sci. U. S. A.* **118**, (2021).

3870 179. Stefansson, H. *et al.* A common inversion under selection in Europeans. *Nat.*  
3871 *Genet.* **37**, 129–137 (2005).

- 3872 180. Boettger, L. M., Handsaker, R. E., Zody, M. C. & McCarroll, S. A. Structural  
3873 haplotypes and recent evolution of the human 17q21.31 region. *Nat. Genet.* **44**, 881–  
3874 885 (2012).
- 3875 181. Itan, Y., Powell, A., Beaumont, M. A., Burger, J. & Thomas, M. G. The origins  
3876 of lactase persistence in Europe. *PLoS Comput. Biol.* **5**, e1000491 (2009).
- 3877 182. Antelope, C. X., Marnetto, D., Casey, F. & Huerta-Sanchez, E. Leveraging  
3878 Multiple Populations across Time Helps Define Accurate Models of Human Evolution: A  
3879 Reanalysis of the Lactase Persistence Adaptation. *Hum. Biol.* **89**, 81–97 (2017).
- 3880 183. Segurel, L. *et al.* Why and when was lactase persistence selected for?  
3881 Insights from Central Asian herders and ancient DNA. *PLoS Biol.* **18**, e3000742 (2020).
- 3882 184. Burger, J. *et al.* Low Prevalence of Lactase Persistence in Bronze Age  
3883 Europe Indicates Ongoing Strong Selection over the Last 3,000 Years. *Curr. Biol.* **30**,  
3884 4307–4315.e13 (2020).
- 3885

## 4b) Detangling Direct and Indirect impacts of sample age from the Mesolithic-Neolithic data on genotype imputation

Rasmus Amund Henriksen<sup>1</sup>, Rasmus Nielsen<sup>1,2</sup>, Lei Zhao<sup>1</sup>, Thorfinn Sand Korneliusen<sup>1</sup>

<sup>1</sup>Lundbeck Foundation GeoGenetics Centre, GLOBE Institute, University of Copenhagen, Copenhagen, Denmark

<sup>2</sup>Department of Integrative Biology, University of California, Berkeley

Many factors can influence the genotype imputation/calling at specific sites, especially when present-day reference panels are used to impute missing genotypes for ancient samples. The unique features of aDNA relative to modern DNA include 1) relatively shallower read depths <sup>1</sup>, 2) shorter read lengths <sup>2</sup>, and 3) different error profiles <sup>3</sup>. Mapping biases that depend on read length and error rates are of particular concern for aDNA and may cause spurious signals of selection. Naturally, read depth may also affect genotype calling. In order to filter SNPs that might be affected by such biases, and to generally correct for and quantify the biases, we develop a causal inference method for distinguishing direct effects of sample age on allele frequency from other (indirect) effects mediated by age-dependent errors, read depth, and read length.

As shown in Figure 4b.1, to distinguish the true selection signal of age on allele frequency, from the signal caused by mapping biases, and other biases, in the ancient samples, we create a model and a workflow which can decompose the influence of sample age ( $A_i$ , age of individual  $i$ ) on genotype ( $G_{ij}$ , Genotype of individual  $i$  at position  $j$ ), into its indirect and direct effects. The imputed genotype for each individual is converted into allele frequencies, representing the homozygous for the reference allele, heterozygous and homozygous for the alternative allele as 0, 0.5 and 1 respectively. The indirect effects are mediated through the three unique features of aDNA as previously described, while the direct impact reflects the true change in allele frequency over the time range from the ancient samples to the modern ones. The three factors are the mean read depth across all sites per individual, the mean read length for each individual at each site, and the third is an overall error estimate for each individual. These three factors are all identified using ANGSD <sup>4</sup> from the aligned BAM files for all individuals used in the study. The depth and length are calculated based solely on the imputed positions ( $j$ ) extracted from the imputed vcf files, whereas the overall error is calculated as described in Orlando et al. 2013 from the entire BAM file containing all the invariant sites.

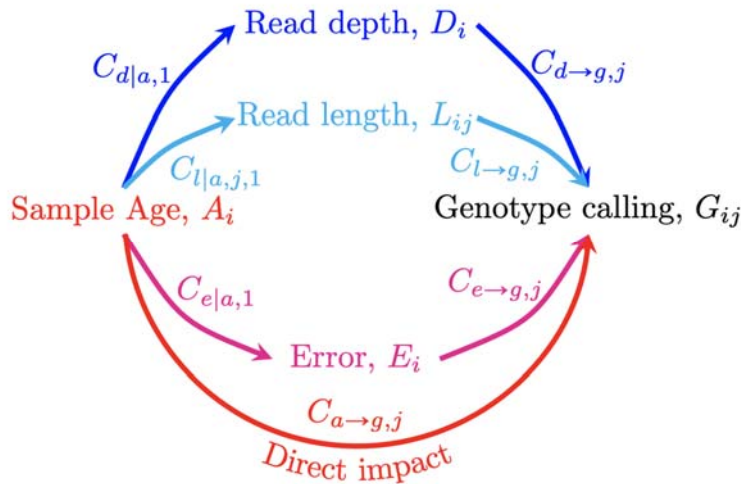

3925

3926

3927

3928

3929

3930

3931

3932

3933

3934

3935

3936

3937

3938

3939

3940

3941

3942

3943

3944

3945

3946

3947

3948

3949

3950

Figure S4b.1. Illustrative figure of the factors that influence genotype calling procedure. The denotations with symbol “|” can be obtained by regression, while the denotations with symbol “→” are derived after PCA.

The initial step is to conduct three linear regressions, one for each of the three factors, mean depth (equation 1), mean length (equation 2) and error estimate (equation 3) with respect to one explanatory variable, i.e., sample age (i.e.,  $A_i$ ). This step is to investigate the influences of sample age on each of the three factors.

$$D_i \triangleq \overline{D_{ij}} \sim C_{d|a,1} A_i + C_{d|a,0} + \epsilon_{d|a,i} \quad (1)$$

$$L_{ij} \triangleq \overline{L_{ijk}} \sim C_{l|a,j,1} A_i + C_{l|a,j,0} + \epsilon_{l|a,ij} \quad (2)$$

$$E_i \sim C_{e|a,1} A_i + C_{e|a,0} + \epsilon_{e|a,i}. \quad (3)$$

Where  $\triangleq$  means definition,  $\overline{D_{ij}}$  means the average depth with regard to  $j$  for a specific individual  $i$ , and  $\overline{L_{ijk}}$  means the average read length, for all reads  $k$  stretching over site  $j$  of individual  $i$ .  $E_i$  means the overall error rate of individual  $i$ .

We assume that the sample age influences these factors, as such it is necessary to eliminate this influence as done in equation 4-6.

$$\Delta_i \triangleq D_i - C_{d|a,1} A_i \quad (4)$$

$$\Lambda_{ij} \triangleq L_{ij} - C_{l|a,j,1} A_i \quad (5)$$

$$\Sigma_i \triangleq E_i - C_{e|a,1} A_i \quad (6)$$

A second round of regression is necessary to detect the direct impact of the three factors as well as the direct impact of age on the genotype. The explanatory variables can be the

3951 sample age ( $A_i$ ) and the three remainders (or the linear combinations of the three  
 3952 remainders). To avoid potential correlations between the three remainders, we perform a  
 3953 Principal Component Analysis. The relationship between the PCA scores and the remainders  
 3954 can be represented as in equation 7 and 8.

3955

$$\left( \frac{\Lambda_{ij} - \Lambda_j}{sd(\Lambda_{.j})}, \frac{\Sigma_i - \Sigma}{sd(\Sigma_{.})}, \frac{\Delta_i - \Delta}{sd(\Delta_{.})} \right)_{n \times 3} = (\alpha_{ij} \beta_{ij}, \gamma_{ij})_{n \times 3} \begin{pmatrix} \vec{\omega}'_{j,1} \\ \vec{\omega}'_{j,2} \\ \vec{\omega}'_{j,3} \end{pmatrix} \quad (7)$$

3956

3957

$$(\alpha_{ij} \beta_{ij}, \gamma_{ij})_{n \times 3} = \left( \frac{\Lambda_{ij} - \Lambda_j}{sd(\Lambda_{.j})}, \frac{\Sigma_i - \Sigma}{sd(\Sigma_{.})}, \frac{\Delta_i - \Delta}{sd(\Delta_{.})} \right)_{n \times 3} (\vec{\omega}_{j,1}, \vec{\omega}_{j,2}, \vec{\omega}_{j,3}) \quad (8)$$

3958

3959 Where  $\Lambda_j$  and  $sd(\Lambda_{.j})$  are the mean and the standard deviation of  $\Lambda$  across individuals  $i$  at  
 3960 fixed position  $j$ .  $\Sigma$  and  $sd(\Sigma_{.})$  are the mean and the standard deviation of  $\Sigma$  across individuals  
 3961  $i$ .  $\Delta$  and  $sd(\Delta_{.})$  are the mean and the standard deviation of  $\Delta$  across individuals  $i$ .  $\vec{\omega}_{j,2}, \vec{\omega}_{j,1},$   
 3962  $\vec{\omega}_{j,3}$  are the three principle directions (column eigenvectors) and the  $\vec{\omega}'_{j,2}, \vec{\omega}'_{j,1}, \vec{\omega}'_{j,3}$  are the  
 3963 corresponding transposed vectors.  $\alpha_{ij}, \beta_{ij}, \gamma_{ij}$  are the principal component scores of

3964  $\left( \frac{\Lambda_{ij} - \Lambda_j}{sd(\Lambda_{.j})}, \frac{\Sigma_i - \Sigma}{sd(\Sigma_{.})}, \frac{\Delta_i - \Delta}{sd(\Delta_{.})} \right)$ , with  $n$  being the number of individuals carrying site  $j$ .

3965

3966 Once all the explanatory variables are independent, the coefficient  $C_{g|a,j,1}$  represent  
 3967 the total impact of age which can be obtained by conducting a final round of regression  
 3968 (equation 9).

$$G_{ij} \sim C_{g|\alpha,j,1} \alpha_{ij} + C_{g|\beta,j,1} \beta_{ij} + C_{g|\gamma,j,1} \gamma_{ij} + C_{g|a,j,1} A_i + C_{0,j} + \epsilon_{ij} \quad (9)$$

3969

3970

3971 The sum of the first three terms of equation 9 can be obtained by multiplying the  
 3972 coefficients  $(C_{g|\alpha,j,1}, C_{g|\beta,j,1}, C_{g|\gamma,j,1})'$  with equation 8 (shown in equation 10). And the effective  
 3973 regression coefficients for  $(\Delta_{ij}, \Lambda_i, \Sigma_i)$  will be observed when calculating the linear slopes of  
 3974 the remainders in Equation 10. Such effective coefficients can be viewed as measurements  
 3975 of the direct impact of the corresponding factors, i.e. length ( $C_{l \rightarrow g,j}$ ), error ( $C_{e \rightarrow g,j}$ ) and depth  
 3976 ( $C_{d \rightarrow g,j}$ ), on the genotype calling (equation 11 - 13).

3977

$$(\alpha_{ij} \beta_{ij}, \gamma_{ij})_{n \times 3} \begin{pmatrix} C_{g|\alpha,j,1} \\ C_{g|\beta,j,1} \\ C_{g|\gamma,j,1} \end{pmatrix} = \left( \frac{\Lambda_{ij} - \Lambda_j}{sd(\Lambda_{.j})}, \frac{\Sigma_i - \Sigma}{sd(\Sigma_{.})}, \frac{\Delta_i - \Delta}{sd(\Delta_{.})} \right)_{n \times 3} (\vec{\omega}_{j,1}, \vec{\omega}_{j,2}, \vec{\omega}_{j,3})_{3 \times 3} \begin{pmatrix} C_{g|\alpha,j,1} \\ C_{g|\beta,j,1} \\ C_{g|\gamma,j,1} \end{pmatrix} \quad (10)$$

3978

3979

$$\vec{\omega}_{j,1} = \begin{pmatrix} \omega_{j,1,1} \\ \omega_{j,2,1} \\ \omega_{j,3,1} \end{pmatrix}, \vec{\omega}_{j,2} = \begin{pmatrix} \omega_{j,1,2} \\ \omega_{j,2,2} \\ \omega_{j,3,2} \end{pmatrix}, \vec{\omega}_{j,3} = \begin{pmatrix} \omega_{j,1,3} \\ \omega_{j,2,3} \\ \omega_{j,3,3} \end{pmatrix}$$

3980

3981

3982

$$C_{l \rightarrow g,j} = \frac{1}{\text{sd}(\Lambda_j)} (\omega_{j,1,1} C_{g|\alpha,j,1} + \omega_{j,1,2} C_{g|\beta,j,1} + \omega_{j,1,3} C_{g|\gamma,j,1}) \quad (11)$$

3983

$$C_{e \rightarrow g,j} = \frac{1}{\text{sd}(\Sigma_j)} (\omega_{j,2,1} C_{g|\alpha,j,1} + \omega_{j,2,2} C_{g|\beta,j,1} + \omega_{j,2,3} C_{g|\gamma,j,1}) \quad (12)$$

3984

$$C_{d \rightarrow g,j} = \frac{1}{\text{sd}(\Delta_j)} (\omega_{j,3,1} C_{g|\alpha,j,1} + \omega_{j,3,2} C_{g|\beta,j,1} + \omega_{j,3,3} C_{g|\gamma,j,1}) \quad (13)$$

3985

3986

3987

3988

3989

3990

3991

Any influence of age on the genotype calling imposed through one of the three factors (depth, length, error) is an indirect impact. The measurements of such indirect impacts are calculated by multiplying equations 11-13 with each of the factors corresponding coefficients obtained from our first round of regression (equation 4-6) for each site  $j$ .

3992

$$C_{a \rightarrow l \rightarrow g,j} = C_{l|a,j,1} \cdot C_{l \rightarrow g,j} \quad (14)$$

3993

$$C_{a \rightarrow e \rightarrow g,j} = C_{e|a,1} \cdot C_{e \rightarrow g,j} \quad (15)$$

3994

$$C_{a \rightarrow d \rightarrow g,j} = C_{d|a,1} \cdot C_{d \rightarrow g,j} \quad (16)$$

3995

3996

3997

3998

3999

Finally, the direct impact of age on the genotype calling at site  $j$  (equation 17) can be obtained by subtracting all indirect impacts of age (equation 14-16) from the total impact of age  $C_{g|a,j,1}$ , obtained from the second round of regression (equation 9).

4000

$$C_{a \rightarrow g,j} = C_{g|a,j,1} - C_{a \rightarrow l \rightarrow g,j} - C_{a \rightarrow e \rightarrow g,j} - C_{a \rightarrow d \rightarrow g,j} \quad (17)$$

4001

4002

4003

4004

4005

4006

4007

4008

4009

4010

$$R_j = \frac{C_{a \rightarrow l \rightarrow g,j} + C_{a \rightarrow e \rightarrow g,j} + C_{a \rightarrow d \rightarrow g,j}}{C_{a \rightarrow g,j}} \quad (18)$$

4011



4012

4013  $R_j$  can also be converted into a fraction representing the proportion of indirect effects on age

4014 relative to the total effect (equation 19), which can equivalently be used for filtering:

4015

$$F_j = \frac{R_j}{1 + R_j} = \frac{1}{1 + \frac{1}{R_j}} \quad (19)$$

4016

4017

4018 To filter out sites in selection analyses that may be affected by biases, we use a fixed

4019 threshold of  $0.5 < F_j \leq 1$ .

4020

## 4021 References

4022 1. Shapiro, B. & Hofreiter, M. A paleogenomic perspective on evolution and gene

4023 function: new insights from ancient DNA. *Science* **343**, 1236573 (2014).

4024 2. Paabo, S. Ancient DNA: extraction, characterization, molecular cloning, and

4025 enzymatic amplification. *Proceedings of the National Academy of Sciences* vol. 86

4026 1939–1943 (1989).

4027 3. Orlando, L. *et al.* Recalibrating Equus evolution using the genome sequence of an

4028 early Middle Pleistocene horse. *Nature* **499**, 74–78 (2013).

4029 4. Korneliussen, T. S., Albrechtsen, A. & Nielsen, R. ANGSD: Analysis of Next

4030 Generation Sequencing Data. *BMC Bioinformatics* **15**, 356 (2014).

4031

4032

## 4033 4c) Over-dispersion in polygenic scores across ancient 4034 populations

4035

Alba Refoyo Martínez<sup>1</sup>, Fernando Racimo<sup>1</sup>

4036

4037 <sup>1</sup>Lundbeck Foundation GeoGenetics Centre, GLOBE Institute, University of Copenhagen,

4038

Copenhagen, Denmark

## 4039 Introduction

4040 We aimed to test whether there was evidence for over-dispersion in polygenic scores across  
4041 different ancient populations. This could indicate if there was evidence for strong  
4042 differentiation in the genetics of traits across ancient populations, beyond what can be  
4043 explained by genetic drift alone.

## 4044 Methods

4045 We used summary statistics from GWASs performed on the UK Biobank cohort <sup>1</sup> by the  
4046 Neale lab (Round 2: <http://www.nealelab.is/uk-biobank/>), which include both quantitative and  
4047 case-control traits. From the case-control case traits, we filtered out those where the N-  
4048 case/N ratio is lower than 1/100 and those that did not have any associated variants at the  
4049 standard genome-wide significance threshold ( $P = 5e-8$ ). We then filtered out variants with  
4050 minor allele frequency lower than 5%, variants with INFO score  $< 50\%$ , variants with a  
4051 genotype probability lower than 0.8 in more than 10% of the individuals, triallelic variants and  
4052 variants flagged as “low-confident” after imputation (Supplementary Note S2).

4053 We divided the genome into 1,703 non-overlapping and approximately independent linkage  
4054 disequilibrium (LD) blocks <sup>2</sup>. From each block, we retrieved the variant with the lowest  
4055 association P-value. We then selected only the variants with a P-value lower than the  
4056 genome-wide significance threshold,  $5e-8$ , for downstream analyses.

4057 Polygenic scores were calculated by summing over the allele frequency of the filtered trait-  
4058 associated variants and weighting them by the effect size obtained from the summary  
4059 statistics from the UK Biobank (round 2). The allele frequency was retrieved from the  
4060 imputed ancient West-Eurasian individuals. Individuals were clustered into groups of closely-  
4061 related individuals using MDS (see Supplementary Note S3). In our overdispersion test, we  
4062 did not include genomes that were not successfully classified as belonging to any of the  
4063 clusters, and removed clusters that contained less than four individuals. This resulted in  
4064 1,119 individuals clustered into 41 groups.

4065 We evaluated our choice of the summary statistics by comparing the Neale Lab scores to  
4066 scores obtained using a different GWAS on the same phenotype and on the same cohort -  
4067 the GWAS ATLAS <sup>3,4</sup> (<https://atlas.ctglab.nl/>). Despite both association tests being performed  
4068 on the same cohort, the two studies applied different filters on the data, which resulted in  
4069 differences in the effect size estimates and in the significance of the SNP associations  
4070 (Figure **S4c.1**, panel C), which in turn lead to discrepancies on the polygenic scores,  
4071 particularly for pre-Neolithic populations, like the Western hunter-gatherers, and for Eastern

4072 Eurasian individuals, like the ancient Siberians, which are more distantly related to the  
4073 present-day British individuals included in the GWAS cohorts (Figure **S4c.1**, panel B). We  
4074 followed the Sohail et al. <sup>5</sup> procedure to detect residual population stratification along the  
4075 axes of population variation by looking for strong correlations between axes of population  
4076 structure and the magnitude of effect size estimates. We found that the GWAS ATLAS had  
4077 substantially more uncorrected population stratification than the Neale Lab GWAS (Figure  
4078 **S4c.1**, panel A). Therefore, all results presented below were based on the scores obtained  
4079 using effect sizes from the Neale Lab (round 2) estimates. We also observed that polygenic  
4080 scores for pre-Neolithic individuals were particularly sensitive to the choice of cohort and to  
4081 the SNP filtering scheme, so we urge caution in the interpretation of those values.

4082 The  $Q_x$  statistic was introduced by <sup>6</sup> to look for overdispersion in polygenic scores across  
4083 populations that cannot be explained simply by genetic drift, assuming the polygenic scores  
4084 were not biased by population stratification in the GWAS cohort from which effect size  
4085 estimates were obtained. Polygenic scores are also assumed to follow a multivariate normal  
4086 distribution under a null model of genetic drift, and this statistic serves to look for departures  
4087 from this model. To compute the  $Q_x$  statistic, an empirical genome-wide covariance matrix is  
4088 needed, which we constructed using a subset of SNPs with a trait-association p-value larger  
4089 than  $5e-8$ , and then we sampled every 20th “non-associated” SNPs across the genome.

4090 To further test the significance of the overdispersion and account for possible deviations from  
4091 the assumptions the  $Q_x$  statistic makes, we also computed P-values using two randomization  
4092 schemes simulating a neutral scenario. The first method was based on the randomization of  
4093 the signs of the effect size estimates of trait-associated SNPs while the other was based on  
4094 sampling variants across the genome with frequencies matching those of trait-associated  
4095 variants in the GBR panel from the 1000 Genomes Project.

4096

4097 To address mapping biases we performed a one-tailed wilcoxon rank-sum test for each trait.  
4098 We evaluated if the candidate associated SNPs had higher values of the artefactual effect  
4099 estimates than the non-associated SNPs used as our neutral baseline (Supplementary Note  
4100 S4b). None of the tests were significant (min-P value = 0.19; max-P Value = 0.99;  
4101 Mean=0.56).

## 4102 Results

### 4103 Polygenic scores across ancient populations

4104 We computed polygenic scores of trait-associated SNPs across the 41 ancient population  
4105 groups. We used the effect size estimates from the UK Biobank Neale lab GWAS <sup>1</sup> and the  
4106 allele frequencies from the 41 population clusters previously described (Supplementary Note  
4107 S3). We filtered out those traits that had less than 10 genome-wide significantly associated  
4108 SNPs, restricting our analysis to a total of 320 polygenic traits. We then used the  $Q_x$  statistic  
4109 on these traits to test for overdispersion across clusters.

4110 We applied  $Q_x$  statistic to each of the 320 traits. Figure **S4c.2** shows p-values for  $Q_x$  statistic  
4111 for the standard genome-wide set of trait-associated SNPs ( $P < 5e-8$ ). From these, 119  
4112 resulted in a nominally significant  $Q_x$  statistic and only 39 remained significantly over-  
4113 dispersed after controlling for multiple testing via a Bonferroni correction (Figure **S4c.3**). We  
4114 grouped these 39 traits into ten broad categories in agreement with different sub-categories  
4115 levels from the Data Showcase (<https://biobank.ctsu.ox.ac.uk/showcase/>): “body  
4116 measurements”, “impedance measures”, “spirometry”, “sun exposure: hair and skin  
4117 pigmentation”, “assay results”, “diabetes, cholesterol or blood pressure”, “diet”, “medical  
4118 conditions”, “mental health” and “sex-specific factors” (Figure **S4c.4**).

4119 We also computed p-values using two randomization schemes to account for possible  
4120 violations of the assumption that the  $Q_x$  statistic is chi-squared distributed: one based on  
4121 randomising of the effect sizes before calculating polygenic scores and the other based on  
4122 frequency-matched variants that were not significantly associated with the trait under study  
4123 <sup>6,7</sup>.

### 4124 Individual scores across time and space

4125 We also computed polygenic scores individually for each ancient genome. Figure **S4c.5**  
4126 shows the ancient genomes projected into the first two principal components, colouring each  
4127 genome with its corresponding polygenic score for height. Maps for each of the clusters are  
4128 also available to better interpret how scores change across space and time (Figures **S4c.6 -**  
4129 **S4c.8**).

### 4130 Differentiation among ancient populations and GBR

4131 Finally, we were interested in determining how differentiated our ancient populations were to  
4132 each other, and to a present-day British panel: the 1000 Genomes GBR panel <sup>8</sup>. This would

4133 enable us to better understand how portable the polygenic scores created using the UK  
4134 Biobank were to each ancient population, by drawing analogies with pairwise comparisons  
4135 with known estimates of score portability between present-day populations<sup>9,10</sup>. In Figure  
4136 **S4c.9.B**, we show genome-wide pairwise  $F_{st}$  estimates<sup>11</sup> computed between GBR and all  
4137 the other present-day population panels from the 1000 Genomes Project using vcfTools<sup>12</sup>. In  
4138 turn, in Figure **S4c.9.A**, we show genome-wide pairwise  $F_{st}$  estimates computed between  
4139 each of our ancient population clusters, as well as between each ancient population cluster  
4140 and GBR. GBR shows lower  $F_{st}$  values when compared to IBD Global Cluster  
4141 “Eurasia\_5000BP\_200BP” which represents modern Eurasian diversity after the major  
4142 Bronze Age migrations events. Within the “Eurasia\_5000BP\_200BP” cluster, GBR is more  
4143 genetically distant to the Steppe populations. GBR shows low values in the order of 0.01  
4144 when compared to “EuropeWCAAsia\_25000BP\_300BP”. The  
4145 “EuropeWCAAsia\_25000BP\_300BP” cluster shows west-asian populations that are thought to  
4146 have brought Neolithic farming practises into Europe, as well as individuals with ancestry  
4147 associated with Caucasus hunter-gatherers. This cluster shows strong differentiation when  
4148 compared to “Europe\_15000\_4000BP”. The cluster “Europe\_15000\_4000BP” (which  
4149 includes both eastern and western hunter-gatherer populations that share more ancestry  
4150 with Siberian samples) clustered together with “Asia\_45000BP\_2000BP”. The  
4151 “Asia\_45000BP\_2000BP” cluster represents Siberian hunter-gatherers sampled during the  
4152 Neolithic and Bronze Age.

## 4153 Discussion

4154 After testing for genetic polygenic score differentiation among ancient populations, we found  
4155 39 traits with significant overdispersion in scores after controlling for multiple testing (Table  
4156 **S4c.10**). Most significant traits are related to pigmentation, body size differences, disorders  
4157 related to diet and sugar levels and mental health conditions. A few of these differences  
4158 among ancient populations have been reported before<sup>13–15</sup> but our analysis provides a  
4159 much more fine-scale account of these differences across time and space, due to the  
4160 relatively higher availability of population genomic data, and across different phenotypes.

4161 The top ten most significantly overdispersed traits are related with either hair or skin  
4162 pigmentation. These phenotypes (Data-field: 1737, 2267, 1717, 1727, C44, C\_SKIN and  
4163 C3\_SKIN) are very closely linked to sun exposure, from which the last three represent  
4164 associations with malignant neoplasms of skin. Polygenic scores for these three traits tend to  
4165 be higher in Bronze Age Europeans and Neolithic Farmers compared to northeastern asian  
4166 and hunter-gathers groups. Skin colour polygenic scores are higher in hunter-gatherers  
4167 groups (Panel C of Figure **S4c.5**). Similarly, Europeans tend to have higher polygenic scores

4168 for blonde and light brown hair colour, while East Asian have higher scores for dark brown  
4169 and black hair (Panel A and B of Figure **S4c.5**).

4170 Intriguingly, we find that Eastern hunter-gatherers had much higher polygenic scores for  
4171 height than Western hunter-gatherers, indicating that even in Mesolithic Europe, before the  
4172 arrival of Neolithic farmers, there was already strong genetic differentiation at variants  
4173 associated with height between local populations. We find that the Yamnaya steppe people  
4174 and the Caucasus hunter-gatherers / Iranian Neolithic people generally have high genetic  
4175 scores for height, while Levant Neolithic peoples, early European farmers and western  
4176 hunter-gatherers have low genetic height scores (Figure **S4c.6**).

4177 Lung capacity is very influenced by height, BMI and ethnicity. One of the most common  
4178 clinical practices to measure lung capacity is forced expiratory volume in the first second  
4179 (FEV-1), which happens to be one of the significant traits (Data-field: 20153) <sup>16</sup> (Figure  
4180 **S4c.4**).

4181 Impedance measures are used for estimating body composition, especially body fat and  
4182 muscle mass <sup>17</sup>. The difference in height between the samples could also partially explain  
4183 the distribution of polygenic scores in the impedance traits category. For instance, taller  
4184 populations require a higher energy intake which is proportional to their basal metabolic rate  
4185 (BMR) <sup>18</sup>. As we can see in Panel D of Figure **S4c.5**, farmers, who have a very similar  
4186 distribution of height polygenic scores as Eastern hunter-gatherers, have lower BMR  
4187 polygenic scores and also a more sedentary life <sup>19</sup>. The body mass index (BMI) is also  
4188 strongly influenced by the percentage of body fat and muscle mass. Therefore, ethnic  
4189 differences in BMI-associated health risks may be caused by differences in impedance  
4190 measures <sup>17</sup>. Height could be a confounding factor when interpreting the significance of  
4191 some closely related traits.

4192 There are a few traits directly or indirectly connected with human diets and local environment  
4193 adaptation. Some of these traits are linked to sugar levels, cholesterol and blood pressure,  
4194 which can increase the risk of developing a cardiovascular disease or diabetes. For instance,  
4195 low levels of potassium in urine is a risk factor for cardiovascular disease and diabetes <sup>20-22</sup>.  
4196 Abnormal low levels of mean corpuscular haemoglobin concentration have been associated  
4197 with local adaptations to high altitude environments <sup>23</sup>.

4198 Three of the significant traits (UK Biobank codes "1940", "2030" and "1980") correspond to  
4199 human feelings and mood instability which can have an effect on mental health. Both worrier

4200 and nervous feelings are associated with anxiety disorders while irritability is one of the  
4201 critical systems to clinically assess depression and/or bipolar affective disorders <sup>24,25</sup>.

4202 It is important to keep in mind that all these polygenic scores rely on effect size estimates  
4203 obtained from the UK Biobank and, in particular, those individuals identifying as “white  
4204 British” within that panel. This might lead to biases in the portability of these scores to  
4205 distantly related ancient populations. For example, ancient Western Eurasian hunter-  
4206 gatherers are as differentiated from present-day British individuals as present-day British  
4207 individuals are to some of the South East Asian populations (ITU, STU, BEB, GIH, PJJ) and  
4208 American (MXL). This means that the expected portability of these scores in Western hunter-  
4209 gatherers should be comparable to that observed in South Asians when computing polygenic  
4210 scores using European effect size estimates <sup>9,10</sup>.

4211 We also note that the value of polygenic scores and the magnitude of the  $Q_x$  statistic may  
4212 both be affected by population stratification in the GWAS panel from which effect size  
4213 estimates were obtained. This seems to be less of a problem in UK Biobank GWAS than in  
4214 other GWAS based on meta-analyses <sup>5,26,27</sup> but we should nevertheless be cautious about  
4215 conclusions drawn purely from these effect size estimates.

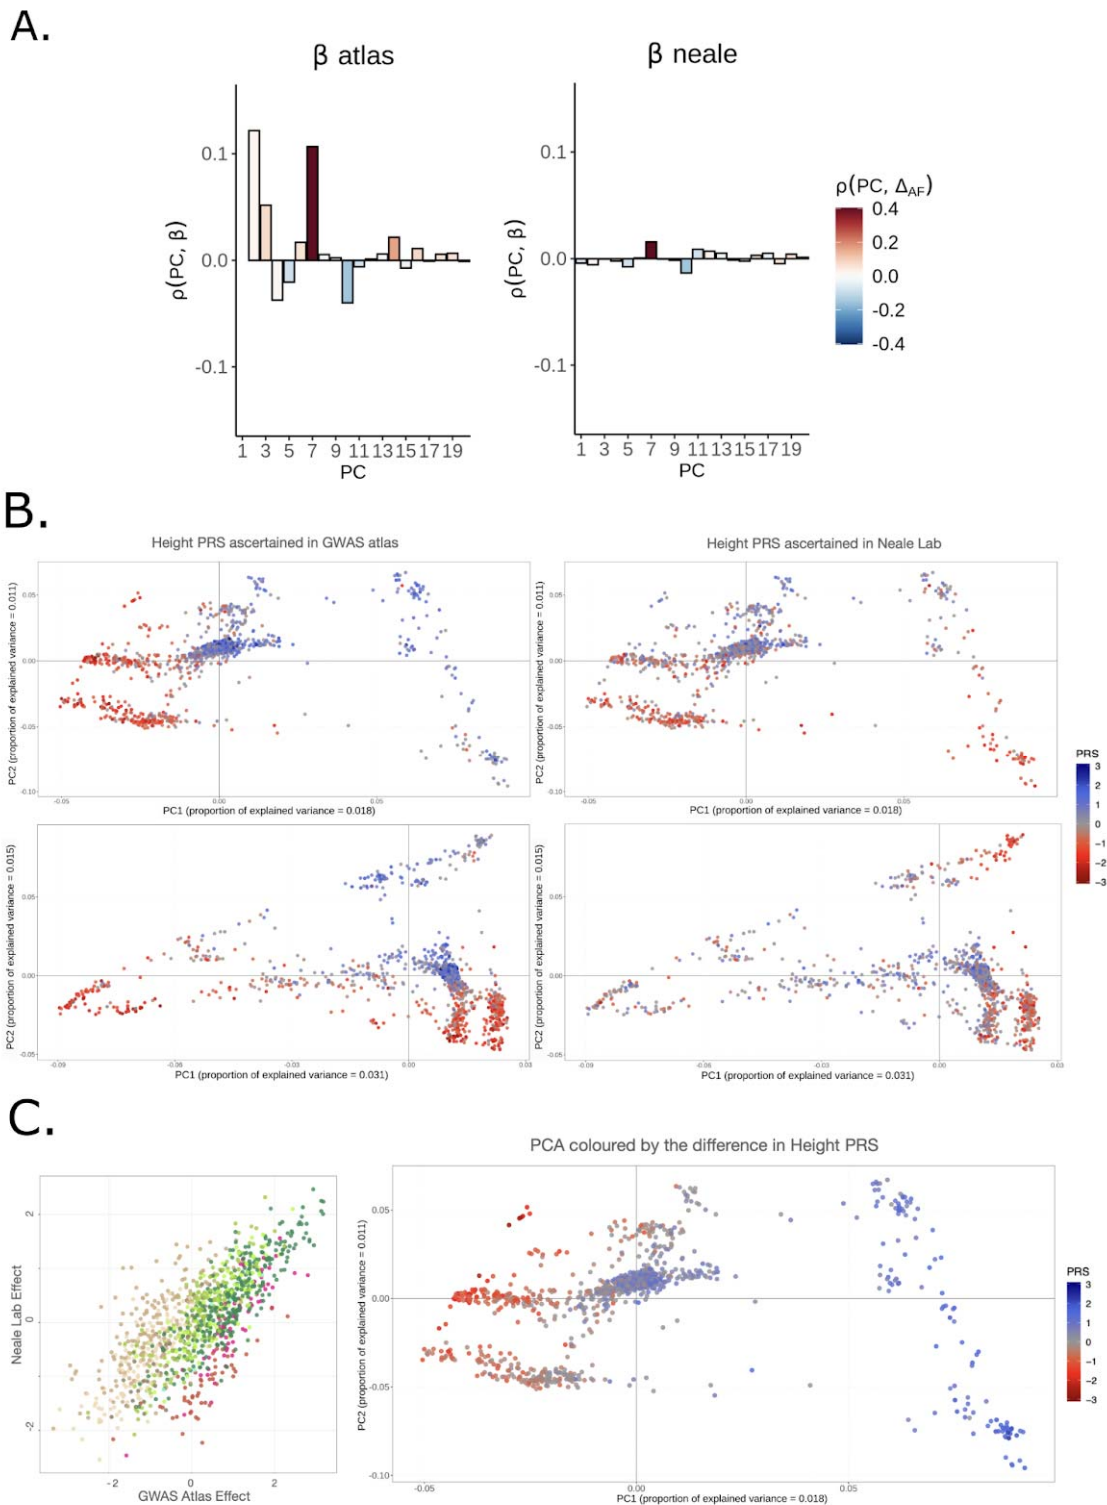

4217  
4218  
4219  
4220  
4221

**Figure S4c.1. A.** Pearson correlations between 20 PC loadings and height effect size estimates from the GWAS atlas, compared to the same correlation using effect size estimates from the Neale Lab GWAS, both summary statistics performed on the UKBiobank. The correlations were computed using SNPs that are present in both the GWAS atlas and Neale



4222 Lab GWAS summary statistics, and in the 1000 Genomes Project. The barplots are coloured  
4223 by the correlation between each loading and the allele frequency difference between GBR and  
4224 TSI. **B.** Height PRS scores ascertained in GWAS atlas (left panel) and in Neale Lab (right  
4225 panel). **C.** Right panel: SNP-associated effect size in GWAS atlas against their effect size in  
4226 the Neale Lab. Left panel: Height PRS scores are coloured by the difference between the two  
4227 ascertainment (GWAS atlas scores versus Neale Lab scores.)  
4228  
4229  
4230

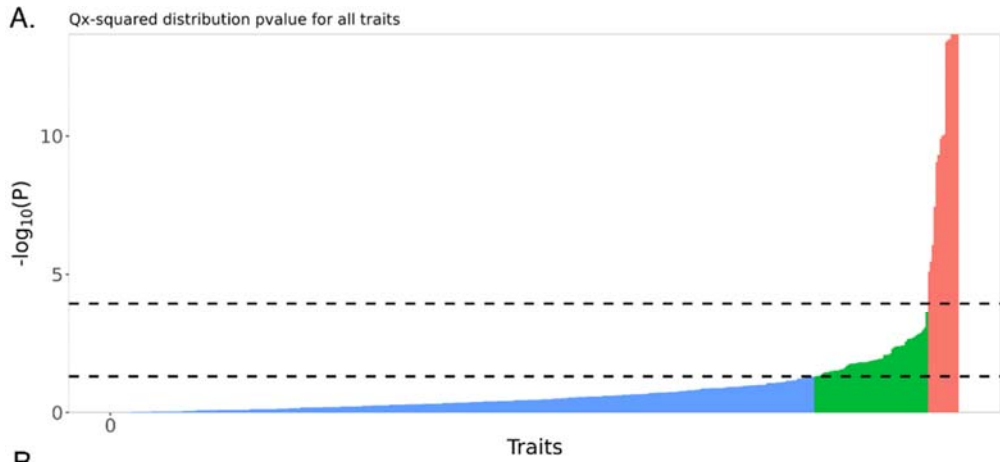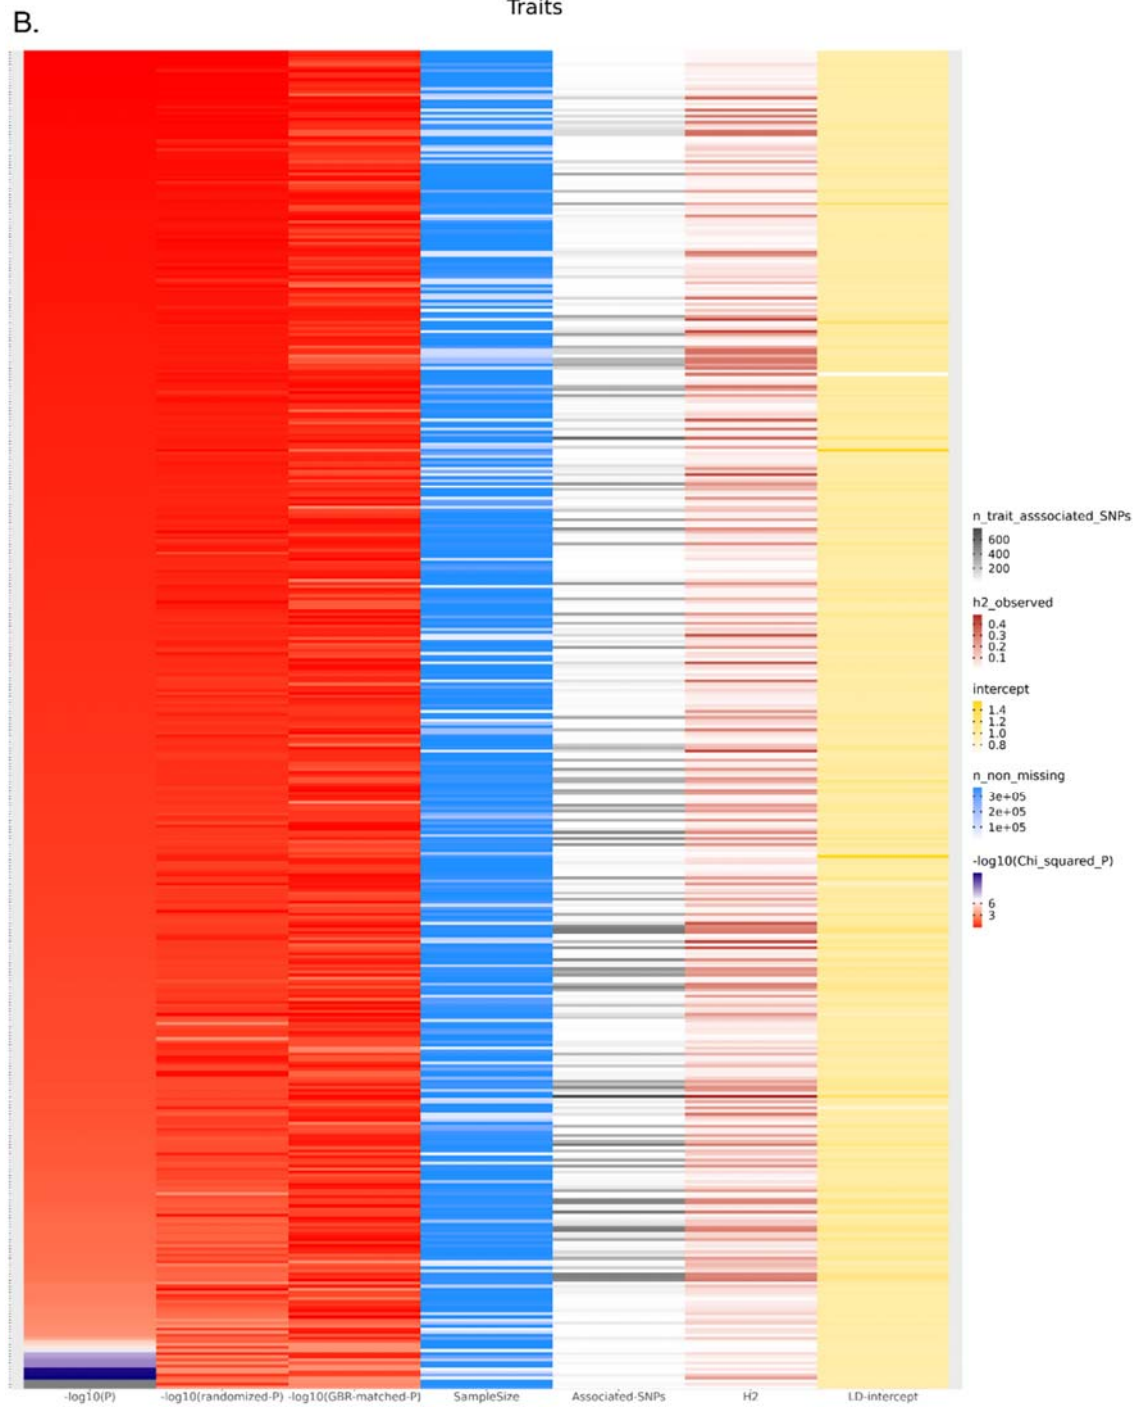

4232  
 4233  
 4234  
 4235  
 4236  
 4237  
 4238  
 4239

**Figure S4c.2. Qx p-value for 320 traits.** A. Trait-associated SNPs are selected using the 5e-8 cutoff. 119 traits are significant ( $p$ -value  $< 0.05$ ) and only 39 are significant after Bonferroni correction ( $p$ -value  $< 0.05/320$ ). B. Heatmap includes the log values for QX p-value, randomised p-value and GBR-matched p-value, sample size, number of associated SNPs used to compute Qx statistic, heritability coefficient and LD-intercept value.

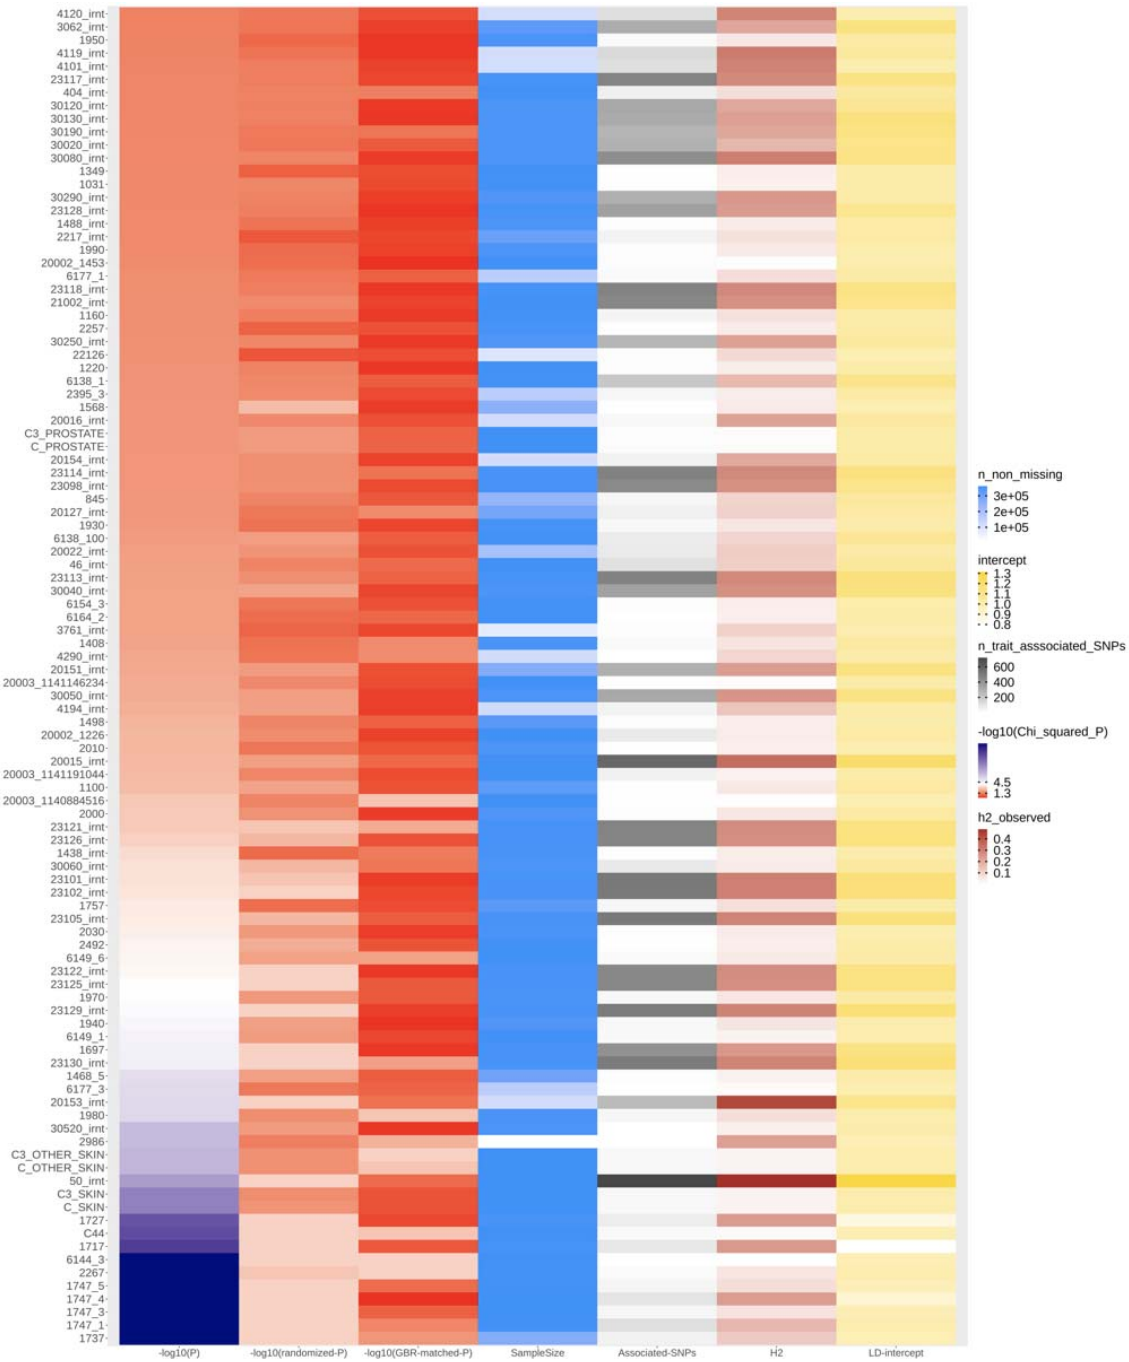

4240  
 4241  
 4242  
 4243  
 4244  
 4245

**Figure S4c.3. Qx p-value for 119 significant traits.** Traits are labelled with the corresponding Uk Biobank data coding system. Heatmap includes the log values for QX p-value, randomised p-value and GBR-matched p-value, sample size, number of associated SNPs used to compute Qx statistic, heritability coefficient and LD-intercept value.

4246  
4247  
4248  
4249  
4250  
4251  
4252

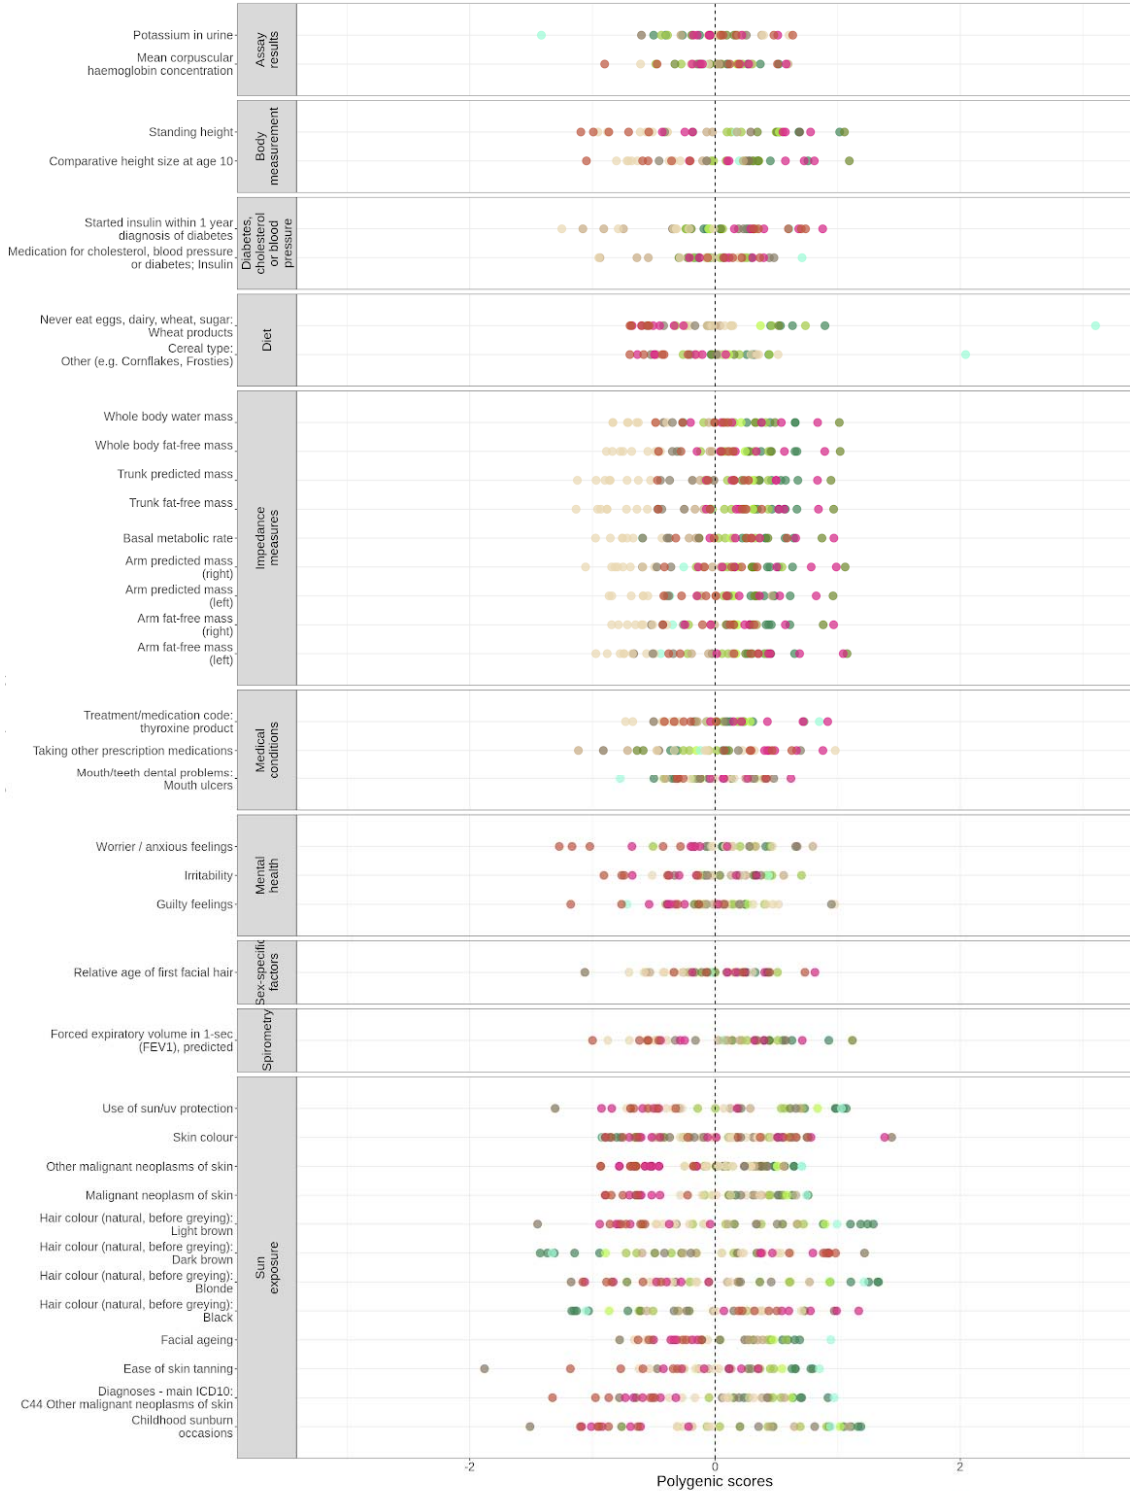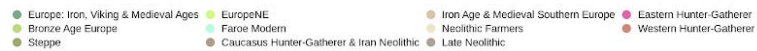

4253

4254  
4255  
4256  
4257  
4258  
4259  
4260

**Figure S4c.4. Polygenic scores for 39 significant traits after Bonferroni correction grouped by traits category (trait-associated SNPs with a p-value < 5e-08).** Polygenic scores for each of the different populations are shown. They are coloured by broader population groups.

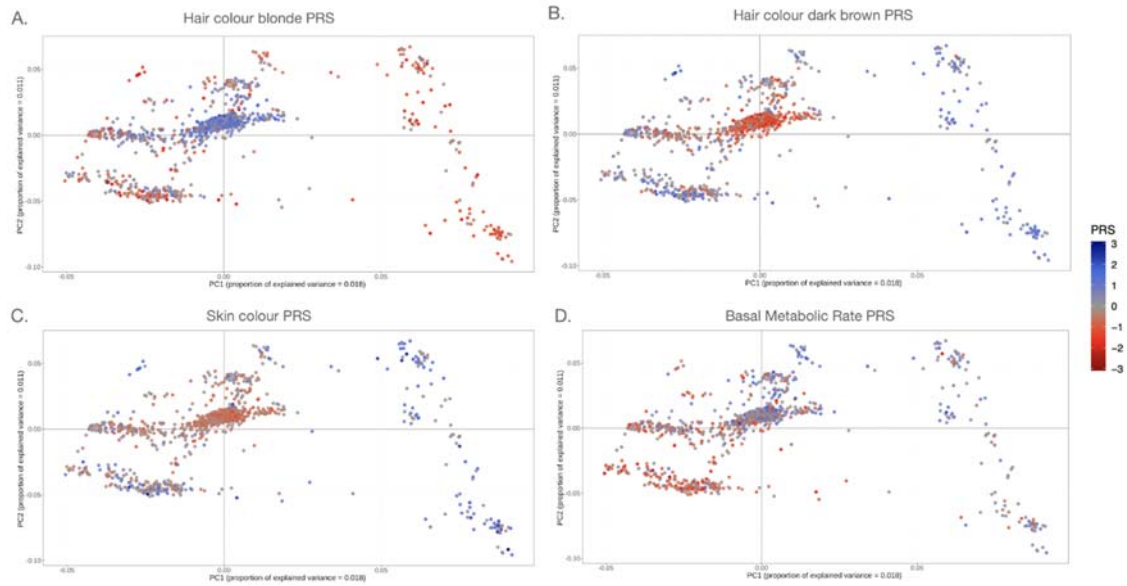

4261  
4262  
4263  
4264  
4265  
4266

**Figure S4c.5. Principal component analysis on West Eurasian samples coloured by individual polygenic scores.** A-C. Polygenic scores of sun exposure traits. D. Polygenic scores of Impedance measures trait.

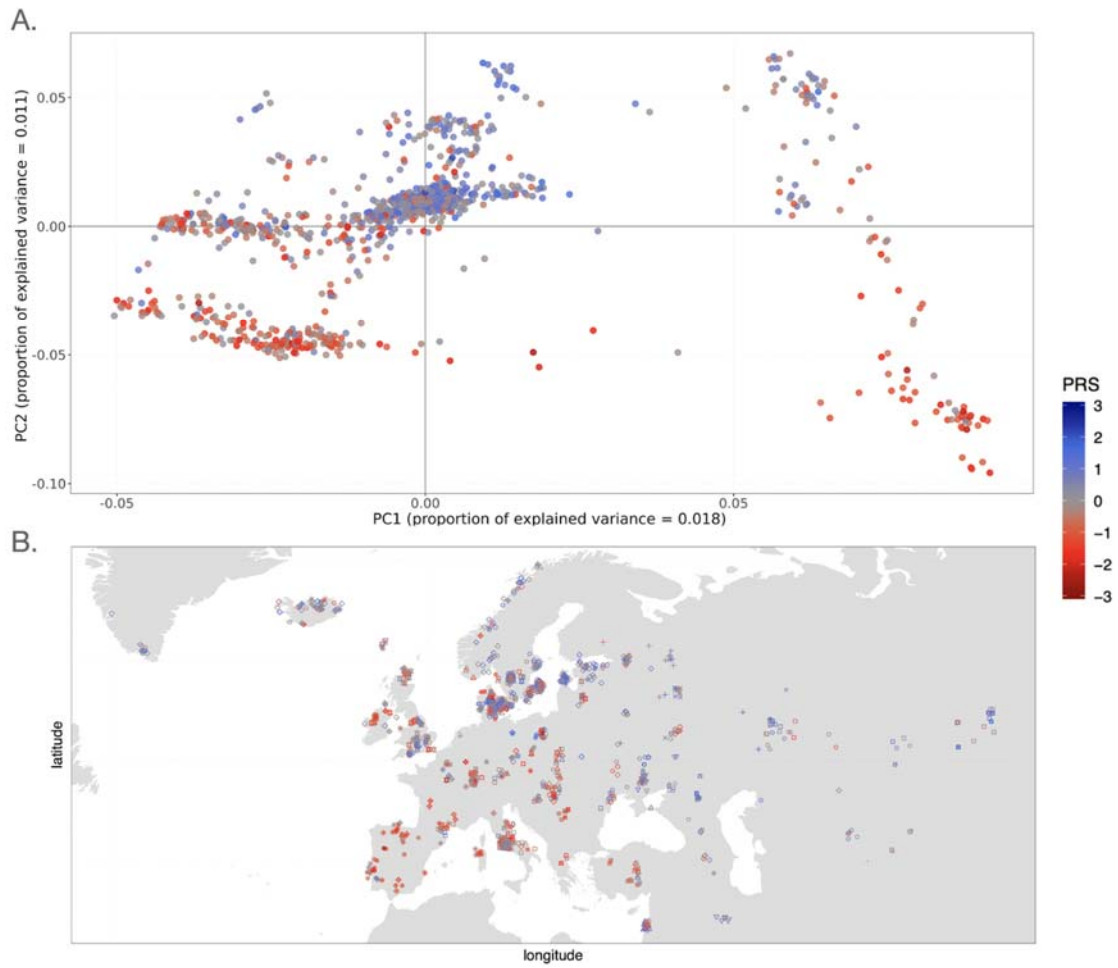

4267  
4268  
4269  
4270

**Figure S4c.6.** Principal component analysis on West Eurasian samples coloured by individual polygenic scores.

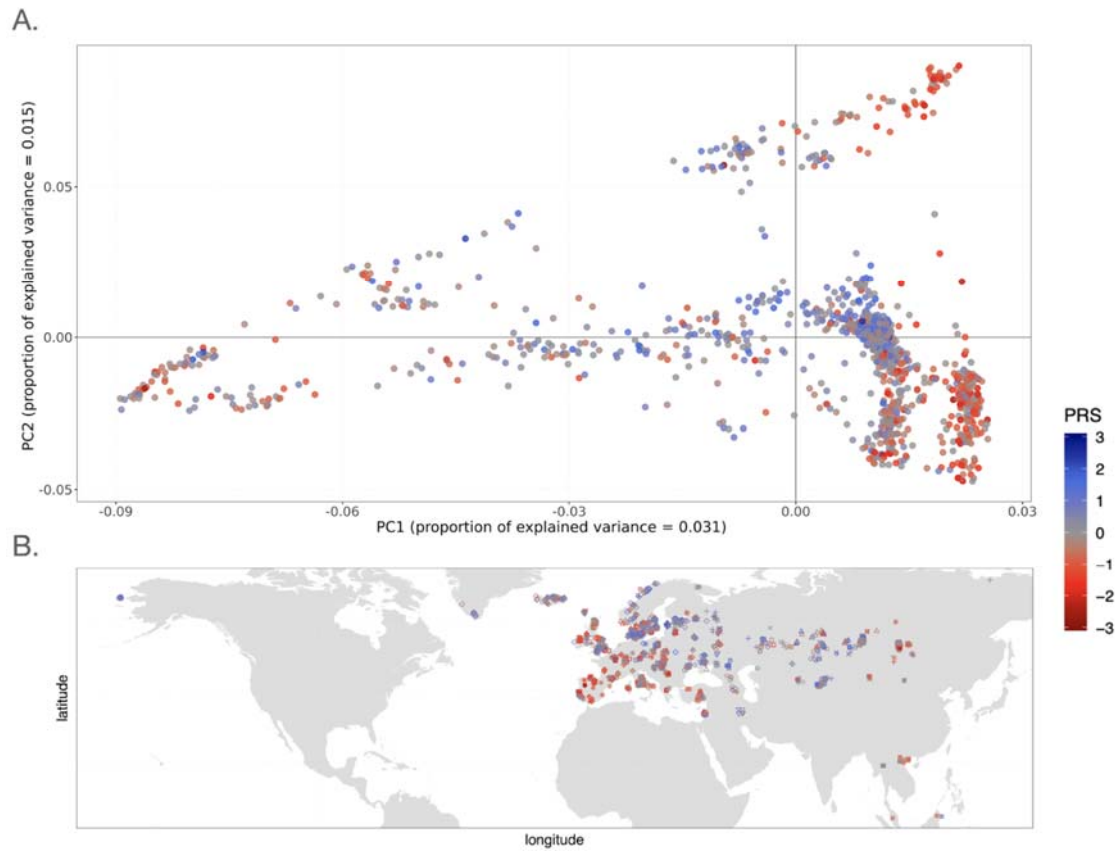

4271

4272

4273

4274

4275

**Figure S4c.7. A. Principal component analysis on 1,332 Eurasian samples coloured by individual polygenic scores. B. World map of all Eurasian samples coloured by polygenic scores for height.**

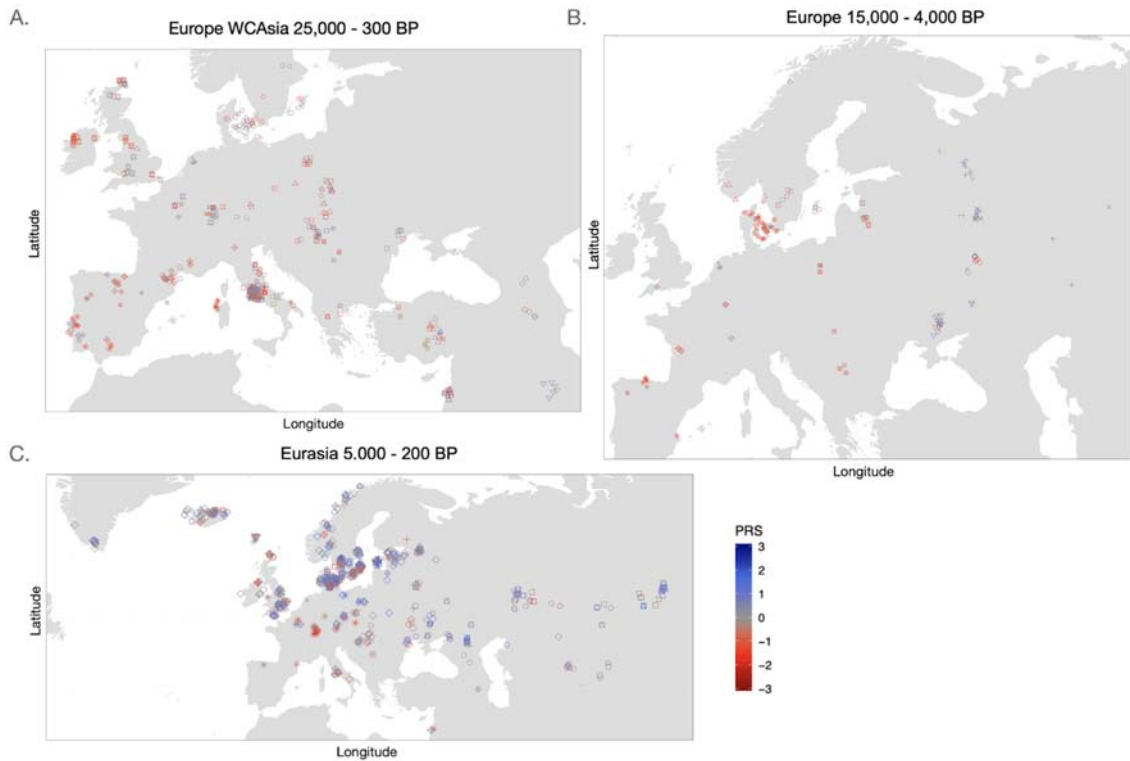

4276  
4277  
4278

Figure S4c.8. Map of Western Eurasian polygenic scores for height.

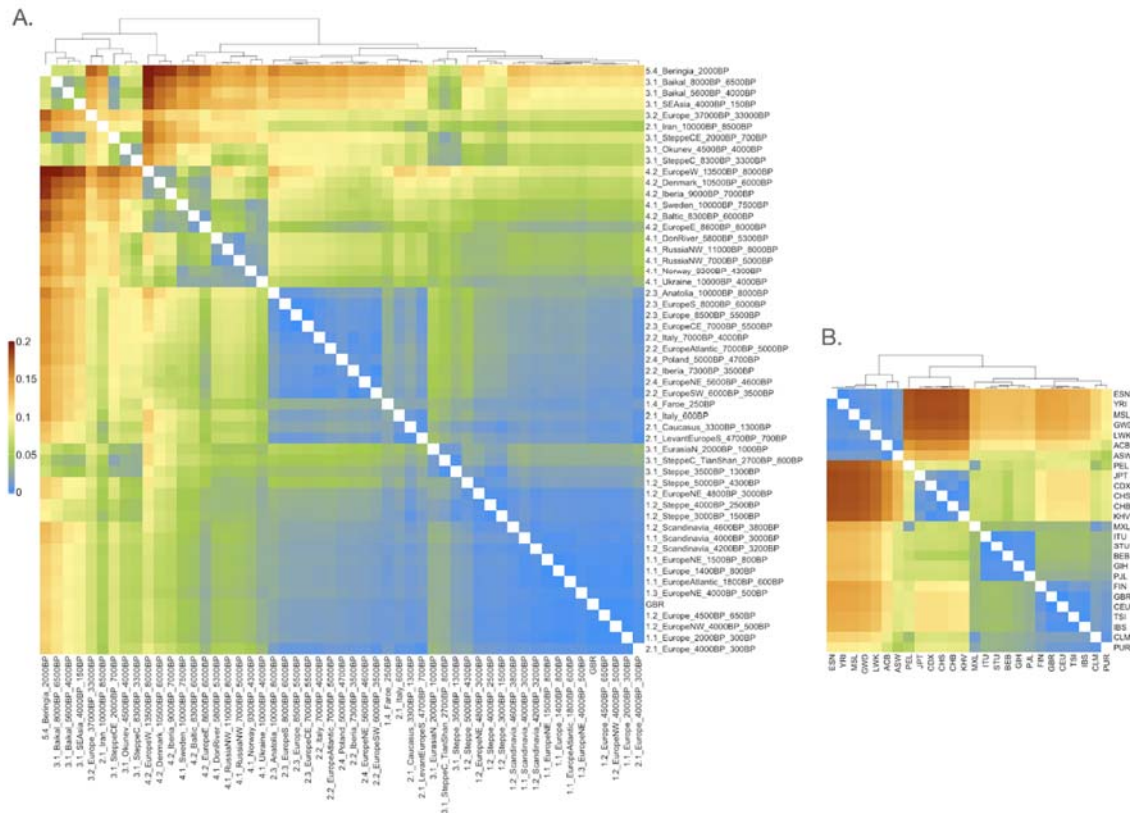

4279



4280  
4281  
4282  
4283  
4284  
4285

**Figure S4c.9. Genetic differentiation between A. ancient clusters and B. modern population in 1000 Genomes Project data set. Pairwise Fst**

| Population Code | Population Description                                            | Super Population Code |
|-----------------|-------------------------------------------------------------------|-----------------------|
| CHB             | Han Chinese in Beijing, China                                     | EAS                   |
| JPT             | Japanese in Tokyo, Japan                                          | EAS                   |
| CHS             | Southern Han Chinese                                              | EAS                   |
| CDX             | Chinese Dai in Xishuangbanna, China                               | EAS                   |
| KHV             | Kinh in Ho Chi Minh City, Vietnam                                 | EAS                   |
| CEU             | Utah Residents (CEPH) with Northern and Western European Ancestry | EUR                   |
| TSI             | Toscani in Italia                                                 | EUR                   |
| FIN             | Finnish in Finland                                                | EUR                   |
| GBR             | British in England and Scotland                                   | EUR                   |
| IBS             | Iberian Population in Spain                                       | EUR                   |
| YRI             | Yoruba in Ibadan, Nigeria                                         | AFR                   |
| LWK             | Luhya in Webuye, Kenya                                            | AFR                   |
| GWD             | Gambian in Western Divisions in the Gambia                        | AFR                   |
| MSL             | Mende in Sierra Leone                                             | AFR                   |
| ESN             | Esan in Nigeria                                                   | AFR                   |
| ASW             | Americans of African Ancestry in SW USA                           | AFR                   |
| ACB             | African Caribbeans in Barbados                                    | AFR                   |
| MXL             | Mexican Ancestry from Los Angeles USA                             | AMR                   |
| PUR             | Puerto Ricans from Puerto Rico                                    | AMR                   |
| CLM             | Colombians from Medellin, Colombia                                | AMR                   |
| PEL             | Peruvians from Lima, Peru                                         | AMR                   |
| GIH             | Gujarati Indian from Houston, Texas                               | SAS                   |
| PJL             | Punjabi from Lahore, Pakistan                                     | SAS                   |
| BEB             | Bengali from Bangladesh                                           | SAS                   |
| STU             | Sri Lankan Tamil from the UK                                      | SAS                   |
| ITU             | Indian Telugu from the UK                                         | SAS                   |

4286  
4287  
4288  
4289

**Figure S4c.10. Full population descriptions of 1000 Genomes Project panels used in our analysis.**

4290   References

- 4291       1. Bycroft, C. *et al.* The UK Biobank resource with deep phenotyping and genomic data.  
4292       *Nature* 562, 203–209 (2018).
- 4293       2. Berisa, T. & Pickrell, J. K. Approximately independent linkage disequilibrium blocks in  
4294       human populations. *Bioinformatics* 32, 283–285 (2016).
- 4295       3. Watanabe, K. *et al.* A global overview of pleiotropy and genetic architecture in  
4296       complex traits. doi:10.1101/500090.
- 4297       4. Canela-Xandri, O., Rawlik, K. & Tenesa, A. An atlas of genetic associations in UK  
4298       Biobank. *Nat. Genet.* 50, 1593–1599 (2018).
- 4299       5. Sohail, M. *et al.* Polygenic adaptation on height is overestimated due to uncorrected  
4300       stratification in genome-wide association studies. *Elife* 8, (2019).
- 4301       6. Berg, J. J. & Coop, G. A population genetic signal of polygenic adaptation. *PLoS*  
4302       *Genet.* 10, e1004412 (2014).
- 4303       7. Racimo, F., Berg, J. J. & Pickrell, J. K. Detecting Polygenic Adaptation in Admixture  
4304       Graphs. *Genetics* 208, 1565–1584 (2018).
- 4305       8. Consortium, T. 1000 G. P. & The 1000 Genomes Project Consortium. A global  
4306       reference for human genetic variation. *Nature* vol. 526 68–74 (2015).
- 4307       9. Martin, A. R. *et al.* Clinical use of current polygenic risk scores may exacerbate health  
4308       disparities. *Nat. Genet.* 51, 584–591 (2019).
- 4309       10. Martin, A. R. *et al.* Human Demographic History Impacts Genetic Risk Prediction  
4310       across Diverse Populations. *Am. J. Hum. Genet.* 100, 635–649 (2017).
- 4311       11. Weir, B. S. & Cockerham, C. C. ESTIMATING F-STATISTICS FOR THE ANALYSIS  
4312       OF POPULATION STRUCTURE. *Evolution* 38, 1358–1370 (1984).
- 4313       12. Danecek, P. *et al.* The variant call format and VCFtools. *Bioinformatics* 27, 2156–  
4314       2158 (2011).
- 4315       13. Mathieson, I. *et al.* Genome-wide patterns of selection in 230 ancient Eurasians.  
4316       *Nature* 528, 499–503 (2015).

- 4317 14. Cox, S. L., Ruff, C. B., Maier, R. M. & Mathieson, I. Genetic contributions to variation  
4318 in human stature in prehistoric Europe. *Proc. Natl. Acad. Sci. U. S. A.* 116, 21484–21492  
4319 (2019).
- 4320 15. Ju, D. & Mathieson, I. The evolution of skin pigmentation associated variation in West  
4321 Eurasia. doi:10.1101/2020.05.08.085274.
- 4322 16. Gao, C. *et al.* Reference values for lung function screening in 10- to 81-year-old,  
4323 healthy, never-smoking residents of Southeast China. *Medicine* 97, (2018).
- 4324 17. Jensen, B. *et al.* Ethnic differences in fat and muscle mass and their implication for  
4325 interpretation of bioelectrical impedance vector analysis. *Appl. Physiol. Nutr. Metab.* 44,  
4326 619–626 (2019).
- 4327 18. Bosy-Westphal, A., Plachta-Danielzik, S., Dörhöfer, R.-P. & Müller, M. J. Short  
4328 stature and obesity: positive association in adults but inverse association in children and  
4329 adolescents. *Br. J. Nutr.* 102, 453–461 (2009).
- 4330 19. Sjödin, A. M. *et al.* The influence of physical activity on BMR. *Med. Sci. Sports*  
4331 *Exercise* 28, 85 (1996).
- 4332 20. [No title]. <https://www.ahajournals.org/doi/10.1161/HYPERTENSIONAHA.119.14028>.
- 4333 21. Zanetti, D. *et al.* Urinary Albumin, Sodium, and Potassium and Cardiovascular  
4334 Outcomes in the UK Biobank: Observational and Mendelian Randomization Analyses.  
4335 *Hypertension* 75, 714–722 (2020).
- 4336 22. O'Donnell, M. *et al.* Urinary sodium and potassium excretion, mortality, and  
4337 cardiovascular events. *N. Engl. J. Med.* 371, 612–623 (2014).
- 4338 23. Marciniak, S. & Perry, G. H. Harnessing ancient genomes to study the history of  
4339 human adaptation. *Nature Reviews Genetics* vol. 18 659–674 (2017).
- 4340 24. Balbuena, L., Bowen, R., Baetz, M. & Marwaha, S. Mood Instability and Irritability as  
4341 Core Symptoms of Major Depression: An Exploration Using Rasch Analysis. *Front.*  
4342 *Psychiatry* 7, (2016).
- 4343 25. Ward, J. *et al.* Genome-wide analysis in UK Biobank identifies four loci associated  
4344 with mood instability and genetic correlation with major depressive disorder, anxiety

4345 disorder and schizophrenia. *Transl. Psychiatry* 7, 1–9 (2017).

4346 26. Berg, J. J. *et al.* Reduced signal for polygenic adaptation of height in UK Biobank.

4347 doi:10.1101/354951.

4348 27. Refoyo-Martínez, A. *et al.* How robust are cross-population signatures of polygenic

4349 adaptation in humans? doi:10.1101/2020.07.13.200030.

4350

#### 4351 4d) Identifying candidates for positive selection using patterns 4352 of ancient population differentiation

4353 Alba Refoyo Martínez<sup>1</sup>, Fernando Racimo<sup>1</sup>

4354

4355 <sup>1</sup>Lundbeck Foundation GeoGenetics Centre, GLOBE Institute, University of Copenhagen,  
4356 Copenhagen, Denmark

4357

#### 4358 Introduction

4359 We aimed to detect whether there is evidence of positive selection in the past 15,000 years  
4360 by searching for loci with strong differentiation in allele frequencies both between populations  
4361 and across time.

#### 4362 Methods

4363 We worked with the imputed dataset (Supplementary Note S2). We applied several variant-  
4364 level filters: 1) we only used SNPs with MAF > 5% , 2) genotype missingness rate < 50% and  
4365 3) variants where <10% individuals had post-imputation genotype probability (GP) <= 0.8.

4366 We used *pcadapt*<sup>1</sup> - a method for detection of allele frequency outliers based on principal  
4367 component analysis - to search for loci that might have evidence for positive selection in the  
4368 past. After performing a PCA on the ancient genomic data, we used a scree plot to visualise  
4369 the percentage of variance explained by each PC.

4370

4371 We performed two scans to look for candidates under positive selection. First, we performed  
4372 a “eurasian” scan, in which we used the first three principal components of a PCA of all  
4373 ancient genomes (higher components explained less than 1% of the total variance in allele  
4374 frequencies) (Figures **S4d.1**, **S4d.2** and **S4d.3**). We also performed a second scan of  
4375 selection restricting only to ancient West Eurasian individuals (excluding ancient Siberian  
4376 populations) and we also used the first three components of the PCA (Figures **S4d.4**, **S4d.5**

4377 **and S4d.6**). We call this the “west-eur” scan. We also performed a third scan, which we call  
4378 “hg-neo” scan, in which we only tested for significant loadings corresponding to the  
4379 component that separates hunter-gatherers (WHG+EHG) from Neolithic farming peoples in  
4380 the aforementioned Western Eurasian PCA (first principal component). The latter scan  
4381 should serve to find loci with particularly strong allele frequencies between these groups with  
4382 two distinct modes of subsistence. Figure **S4d.2** and **S4d.5** shows Manhattan plots for each  
4383 of the three scans.

4384

4385 We selected the top-scoring 300 SNPs with the lowest p-values and merged them into  
4386 candidate regions if they were within 100kb of each other. Each region was labelled with the  
4387 P-value of its highest scoring SNP, which was then used to rank regions. HGNC protein-  
4388 coding genes within each region were retrieved using *biomaRt*<sup>2</sup>. Table **S4d.1** lists the 25  
4389 top-scoring candidate regions from the “eurasian” scan, while Tables **S4d.2** and list the top  
4390 candidate regions from the “west-eur” and “hg-neo” scan, respectively.

4391

4392 None of our candidate regions seem to be affected by mapping biases. The F<sub>j</sub> value for  
4393 highest scoring SNP in each region is lower than 0.5 (Supplementary Note S4b).

## 4394 Results

### 4395 Eurasian scan

4396 In the Eurasian-wide scan, the strongest peak contains the gene SLC24A5, involved in skin  
4397 and eye pigmentation, and previously reported to be under positive selection in Western  
4398 Eurasia<sup>3–6</sup> (Figure **S4d.2**). We also recover the region encompassing the *EDAR* gene which  
4399 has been implicated in numerous studies of positive selection involving East Asian  
4400 populations<sup>7–9</sup>. Variants in this gene are associated with numerous ectoderm-related traits,  
4401 including hair thickness and ectodermal dysplasia<sup>10</sup> and tooth morphology<sup>11</sup>.

4402

4403 We also found a candidate peak (chr2:25874547-26568094), containing several genes  
4404 (*ASXL2*, *RAB10*, *HADHA*, *GPR113*) involved in glucose homeostasis mainly in response to a  
4405 high fat diet. The *ASXL2* gene regulates skeletal, glucose, and adipocyte homeostasis. It  
4406 promotes adipogenesis, the formation of osteoclasts and insulin resistance<sup>12–14</sup>. A similar  
4407 activity is carried out by *RAB10*, it also regulates glucose homeostasis by improving  
4408 hyperglycemia, regulating at the skeletal muscle level<sup>15–17</sup>. *HADHA* participates in long fatty  
4409 acid oxidation for energy production in different tissues<sup>18–20</sup>. Finally, *GPR113* participates in  
4410 energy expenditure in fat tissue and glucose homeostasis. It improves insulin sensitivity and

4411 prevents obesity when it binds to bile acids <sup>21</sup>. High allele frequencies in East Asian  
4412 populations (Panel B of Figure **S4d.7**).  
4413  
4414 We found four peaks containing genes associated with cardiovascular disorders and obesity.  
4415 One of these (chr20:18991679-19454079) overlaps with the SLC24A3 gene. This is a salt  
4416 sensitivity gene which is significantly expressed in obese individuals <sup>22-24</sup> and it is associated  
4417 with hypertension <sup>25</sup>. We also find a peak in an intergenic region (chr3:123433220-  
4418 123889576) containing ROPN1 and KALRN, two genes involved in vascular disorders <sup>26-28</sup>.  
4419 The alternative allele at the top SNP in this region is at particularly high frequency in ancient  
4420 Steppe populations. Another candidate region (chr1:234142067-234549596) contains  
4421 SLC35F3, which codes for a thiamine transport and has been associated with hypertension  
4422 in a Han Chinese cohort <sup>29,30</sup>. In the same region, we also find COA6, which has high  
4423 expression in cardiac pathologies <sup>31</sup>. The alternative allele frequency at the top SNP in the  
4424 region is high in East Asian populations (Panel B of Figure **S4d.7**). Finally, the region  
4425 (chr10:90592757 - 91009553) contains several genes (CH25H, FAS) associated with obesity  
4426 and lipid metabolism <sup>32-34</sup>, and immune responses <sup>35</sup>.

4427  
4428 One of the top candidate regions (chr11:131077365-131516733) contains a gene - NTM -  
4429 involved in neuropsychiatric disorders <sup>25,36</sup>, while another region (chr11:44634764 -  
4430 45073989) contains a gene associated with schizophrenia, TSPAN18. It has previously  
4431 shown that the schizophrenia-risk SNPs within this region are highly diverged between  
4432 Europeans and East Asians <sup>37</sup>. In chromosome 7 (chr7:95947959-96347959), SLC25A13,  
4433 which is highly associated with citrin deficiency in East Asian populations <sup>38,39</sup>. High  
4434 alternative allele frequencies in East Asians (Panel A of Figure **S4d.7**) <sup>40,41</sup>.

4435

#### 4436 West Eurasian scan

4437 In the scan restricting to ancient populations in Western Eurasia ("west-eur"), we recover  
4438 three regions which are involved in skin, hair and eye pigmentation, and have been  
4439 previously implicated in differences in these traits across present-day Eurasians: two in  
4440 chromosome 15 containing the genes *SLC24A5/MYEF2/CTXN2* and *OCA2/HERC2*  
4441 respectively and one in chromosome 5, containing gene *SLC45A2* <sup>3,42-45</sup>. Alternative allele  
4442 frequencies shown in Figure **S4d.8**.

4443

4444 The region containing *LCT/MCM6* - responsible for lactase persistence in Europe - is also a  
4445 candidate region in the selection scan <sup>46-48</sup>. We also recover the TLR-1-6-10 gene cluster,

4446 which is known to be a target of selection in Europe and is associated with the immune  
4447 response <sup>46-48</sup> (Panel A, Figure **S4d.8**).

4448

4449 Additionally, we find some new potentially important candidate regions for positive selection.  
4450 The region showing the strongest evidence of selection is located in chromosome 6  
4451 (chr6:134192815-134628278), around the SLC2A12 gene, which codes for a glucose  
4452 transporter that participates in glucose homeostasis <sup>49,50</sup>. Variants in this gene are associated  
4453 with mean corpuscular levels, heart diseases and height. The alternative allele of the  
4454 highest-scoring SNP was at high frequency in hunter-gatherers but at much lower  
4455 frequencies in Neolithic farmer populations and other, more recent, populations (Panel B,  
4456 Figure **S4d.8**).

4457

4458 Another novel candidate region overlaps with the VAMP 5-8 gene cluster in chromosome  
4459 2:85369379-85885211 a region associated with cardiovascular diseases <sup>51,52</sup>. In  
4460 chr9:27009422-27434948, we found a peak overlapping the TEK gene, which codes for a  
4461 tyrosine kinase receptor expressed in endothelial cells. This gene has an important role in  
4462 angiogenesis and cardiovascular development and stability, and it is involved in several  
4463 vascular disorders <sup>53-55</sup>. Recent studies have also investigated its role in asthma and allergic  
4464 conjunctivitis <sup>53-56</sup>. Intermediate allele frequencies in Eastern hunter-gatherers in both  
4465 regions (Panel B, Figure **S4d.8**). Region chr1:227020437 - 227877723 contains CDC42BPA,  
4466 also known as MRCK $\alpha$ , an important gene involved in iron utilisation <sup>57</sup> is involved in the  
4467 erythropoiesis regulation <sup>58</sup>. The alternative allele at the top-scoring SNP in this region is at  
4468 high frequencies found in hunter-gatherer groups, predominantly in eastern hunter-gatherers  
4469 (Panel B, Figure **S4d.8**).

4470

4471 In chr15:38464638-38992430, we recovered RASGRP1, associated with immunity and  
4472 related to systemic lupus erythematosus <sup>59</sup>, rheumatoid arthritis <sup>60</sup> or Epstein-Barr virus <sup>61</sup>  
4473 among other disorders. The alternative allele at this SNP is at high frequencies in eastern  
4474 hunter gatherers and other ancient Baltic populations (Panel B, Figure **S4d.8**). We also  
4475 found a wide candidate region containing several high-scoring SNPs in chromosome  
4476 16:66852047-67871804. The gene that falls in the highest peak of the region is ATP6V0D1,  
4477 and it plays a very important role in the replication of influenza virus <sup>62,63</sup>. In this region, there  
4478 are also several genes - *TPPP3/ZDHHC1* and *HSD11B2* - associated with obesity,  
4479 cardiovascular diseases and hypertension <sup>64-70</sup>. The alternative allele at the top-scoring SNP  
4480 has intermediate allele frequencies in hunter-gatherer populations, and higher frequencies in  
4481 eastern hunter-gatherers.

4482

4483 Neolithic vs. hunter-gatherer scan

4484 The “neo-hg” scan specifically recovers patterns of allele differentiation along the axis  
4485 separating hunter-gatherer and farmer populations in West Eurasia. In this scan, we find a  
4486 large number of high-scoring regions associated with lipid and sugar metabolism, and  
4487 various metabolic disorders.

4488

4489 For example, we recover the *FADS* gene cluster, involved in lipid metabolism. This region is  
4490 presumed to be important in the transition to a diet rich in grains, as a consequence of the  
4491 expansion of agriculture in Europe and/or the demographic transitions subsequent to it <sup>47,71–</sup>  
4492 <sup>73</sup>. This region is also found in the “west-eurasia” scan. The alternative allele frequency at the  
4493 top-scoring SNP is very high in hunter-gatherer populations.

4494

4495 Another region is located in chromosome 22:31353354-31759255 and also contains genes  
4496 involved in lipid metabolism: *PATZ1*, *LIMK2*, *MORC2* and *PLA2G3*. *PATZ1* down-regulates  
4497 *FADS1* <sup>74</sup>, *LIMK2* shows particularly elevated expression in metabolic syndrome <sup>75</sup>, *MORC2*  
4498 plays an important role in cellular lipid metabolism <sup>76–78</sup> and *PLA2G3* contributes to  
4499 atherogenesis <sup>79–81</sup>. The top-scoring SNP in this region has high alternative allele frequencies  
4500 in Neolithic farmer populations (Panel A, Figure **S4d.9**).

4501

4502 At chromosome 12:6875213-7366672, we find a region with several genes involved in lipid  
4503 metabolism: *PTPN6*, *EMG1*, *PHB2*, *LPCAT3*, *C1S*. *LPCAT3* is essential in high fat diets and  
4504 associated with oleic acid levels and linoleic acid <sup>82</sup> and its deficiency alters cholesterol  
4505 promoting atherosclerosis <sup>83</sup> and plays an important role in hyperuricemia <sup>83,84</sup>. *C1S* also  
4506 plays a crucial role in innate immunity <sup>85</sup> and has been recently associated with coronary  
4507 syndrome <sup>86</sup>.

4508

4509 In chromosome 17:8655348-9223981, we found the *PIK3* family (*PIK3R5*, *PIK3R6*) which is  
4510 involved in glucose homeostasis and plays an important role in obesity and insulin resistance  
4511 in type 2 diabetes <sup>87–89</sup>.

4512

4513 In chromosome 11:27432440-27832440 we find a region containing *BDNF* (brain-derived  
4514 neurotrophic factor), expression of which is associated with obesity <sup>90,91</sup>. It participates in the  
4515 reduction of free fatty acids, cholesterol and glucose levels and enhances energy  
4516 expenditure <sup>92</sup>. Its expression has been shown to be suppressed with a high-fat sucrose diet  
4517 <sup>90,9394, 90,93</sup>. High alternative allele frequency in HG (Panel A, Figure **S4d.9**).

4518



4519 One of the strongest peaks in this scan corresponds to SLC2A12, coding for a glucose  
4520 transporter. The next peak is located in chromosome 17:79055998-79469799. SLC38A10,  
4521 which falls in the tip of the peak, is involved in absorption of amino acids from the GI tract <sup>95</sup>  
4522 and has been suggested to play a role in pathways involved in neurotransmission <sup>96,97</sup>.  
4523 BAIAP2's <sup>98,99</sup> and AATK's expression <sup>100,101</sup>, which are also found in the same region, are  
4524 related to high-fat and omega3 fatty acids. Higher alternative allele frequencies are found in  
4525 hunter-gatherers, in particular in Eastern-HG (Panel A, Figure **S4d.9**).

4526

4527 The highest peak in chromosome 4 contains several genes involved in alcohol metabolism,  
4528 ADH1B, ADH1C and ADH7 <sup>102,103</sup>. In Panel B, Figure **S4d.9**, we can see the highest  
4529 alternative allele frequencies for the oldest samples, which correspond to hunter-gatherers.

4530

4531 Two of the top peaks are related to innate immune response in humans. In chromosome  
4532 14:73102086-73502086, ZFYVE1 is involved in TLR3-mediated immune response and  
4533 regulates antiviral response <sup>104,105</sup>. In chromosome 3:98028061-98476960, GPR15 is related  
4534 to immune tolerance and it regulates the homeostasis in the intestine mucosa <sup>104,106,107</sup>. In  
4535 chromosome 18:46132358-46558884, SMAD7 is associated with inflammatory bowel  
4536 diseases such as crohn's disease <sup>108-110</sup>.

4537

4538 Two regions are related to brain disorders. In chromosome 1:110588519-111127548,  
4539 several genes regulate neuronal ion channels: KCNC4, SLC6A17, and STRIP1. Mutations in  
4540 SLC6A17 cause intellectual disabilities associated with speech impairment and behavioural  
4541 problems <sup>111</sup>, while the KCNC gene family has also been associated with intellectual  
4542 disability <sup>112</sup>.

4543

4544 Figures

4545

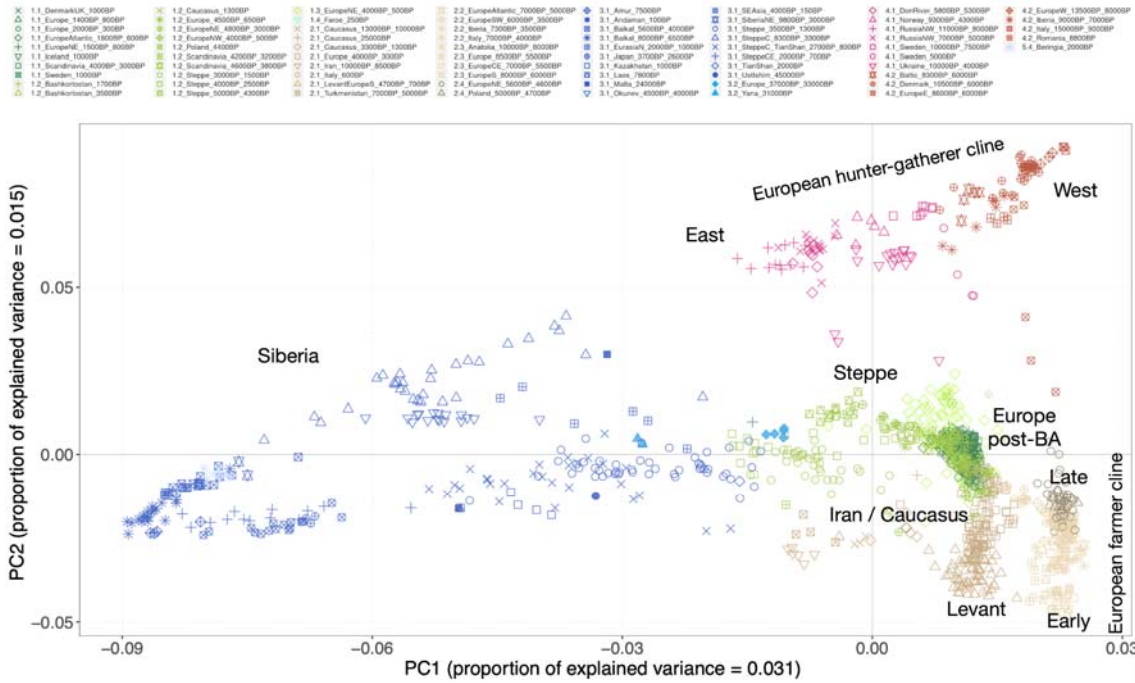

4546

4547 **Figure S4d.1. Principal component analysis on 1402 Eurasian samples.** The first  
 4548 component explains 3.1% of the variance and separates East Asian, Steppe and European  
 4549 samples. The second component separates farmers and Hunter-gatherers (1.5%).

4550 Eurasian scan

Manhattan plot using k=3

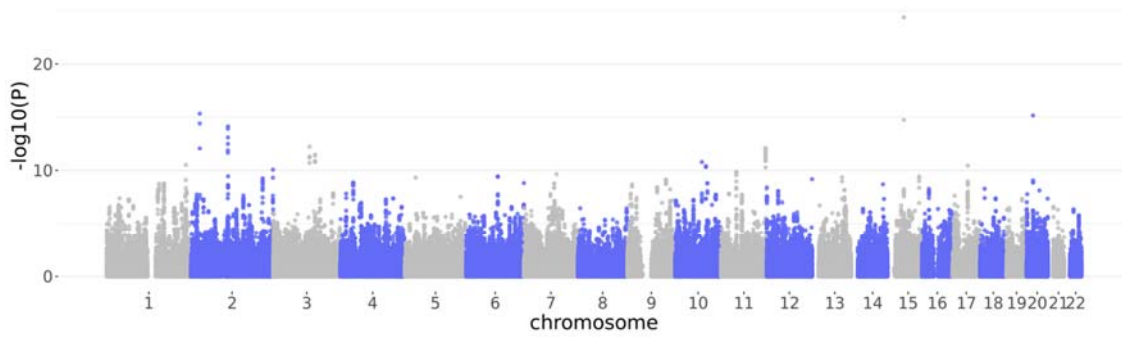

Manhattan plot using k=3 :component-wise pc=1

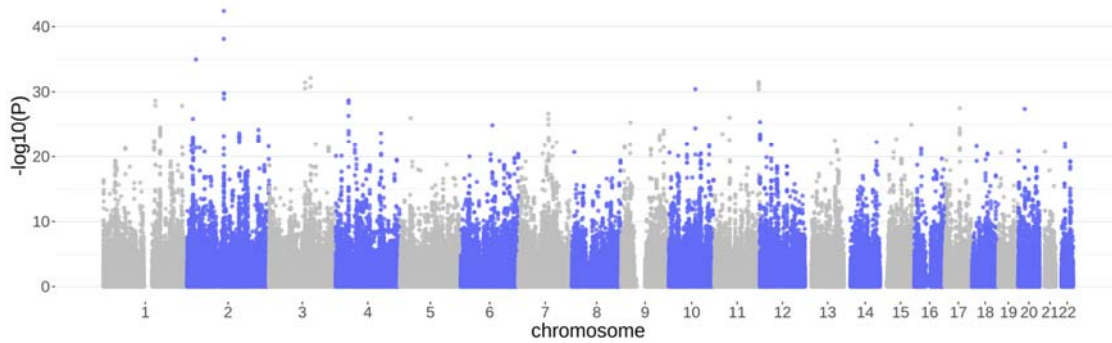

Manhattan plot using k=3 :component-wise pc=2

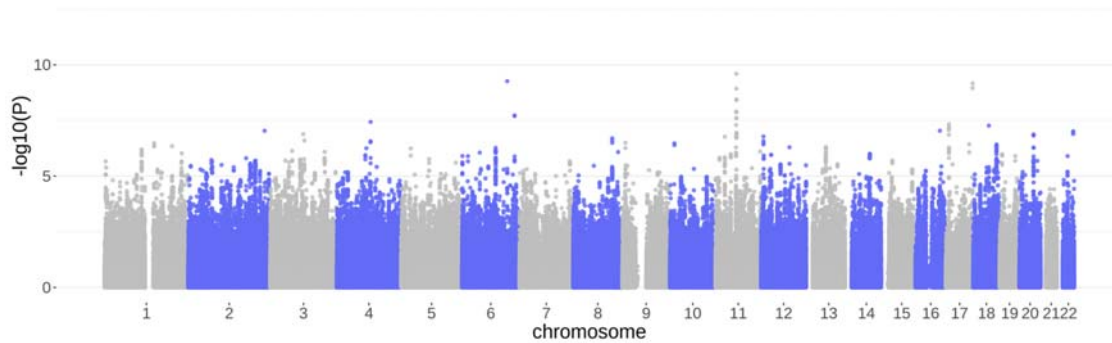

4551  
4552  
4553  
4554  
4555

Figure **S4d.2**. Genome scan using pcadapt k=3. A. Method: mahalanobis distances. Manhattan plot scanning the whole genome. B and C. Component-wise genome scans for component PC1 and component PC2, respectively.

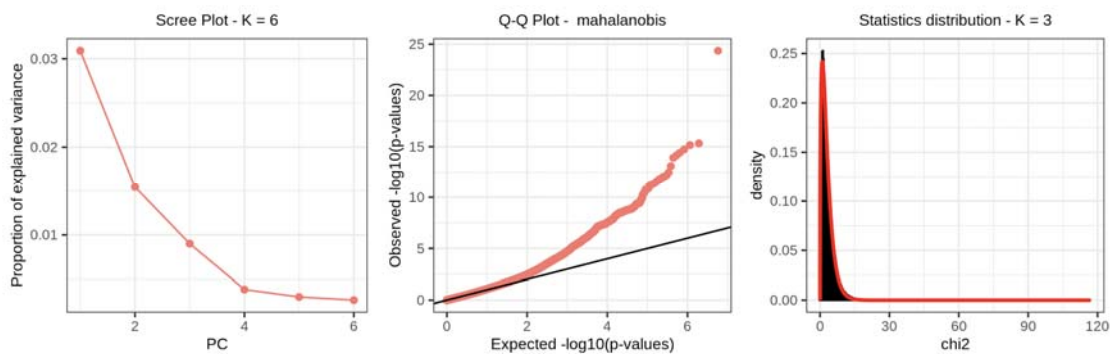

4556

4557 Figure S4d.3. A. Scree plot showing proportion of explained variance of the first PCs in the  
 4558 pcadapt analysis. B. Q-Q plot using mahalanobis method for K=3. Distribution of pcadapt  
 4559 scores (k=3) compared to chi-squared distribution with one degree of freedom (red line).  
 4560

4561 West-Eurasian

4562

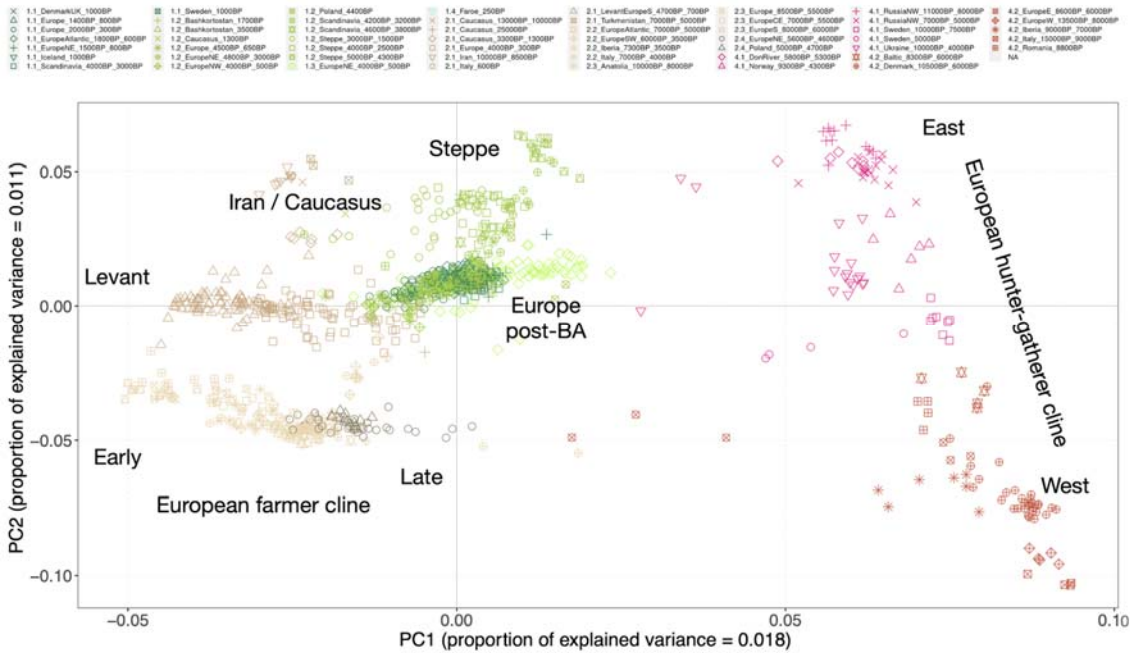

4564

4565 **Figure S4d.4. Principal component analysis on 1165 Eurasian samples.** The first  
 4566 component explains 1.8% of the variance and separates East Asian, Steppe and European  
 4567 samples. The second component separates farmers and Hunter-gatherers (1.1%).

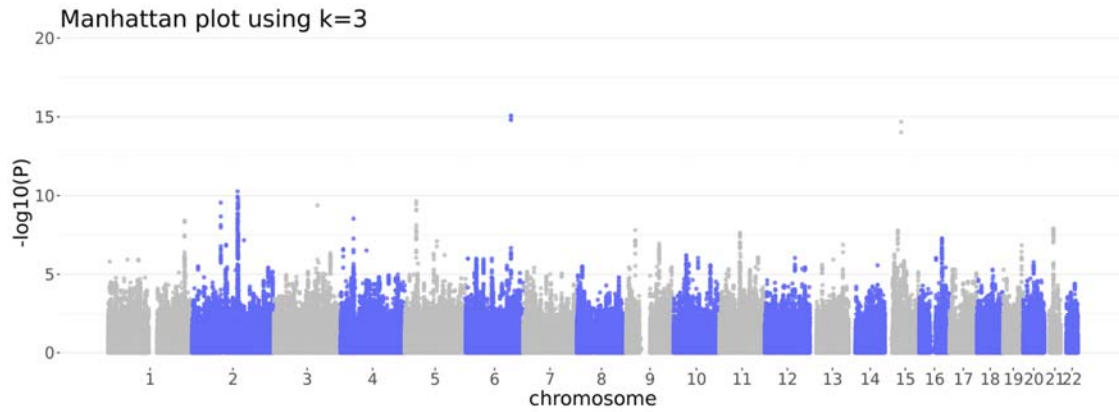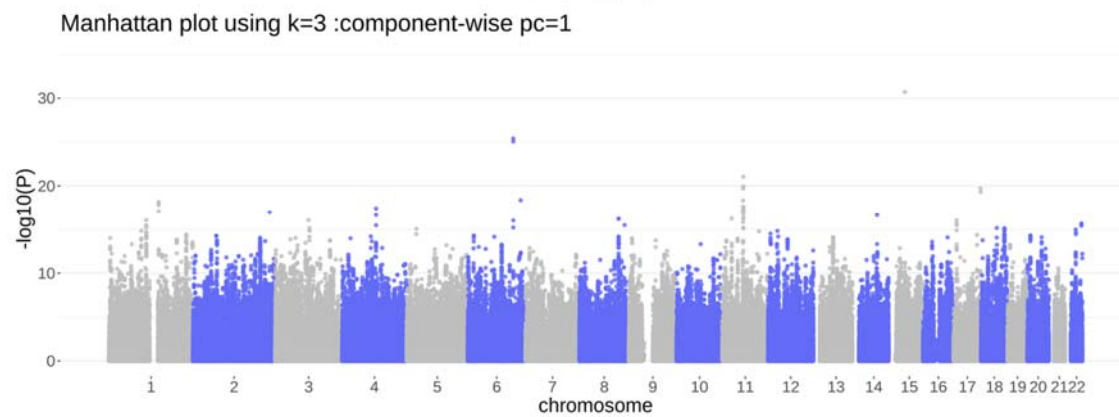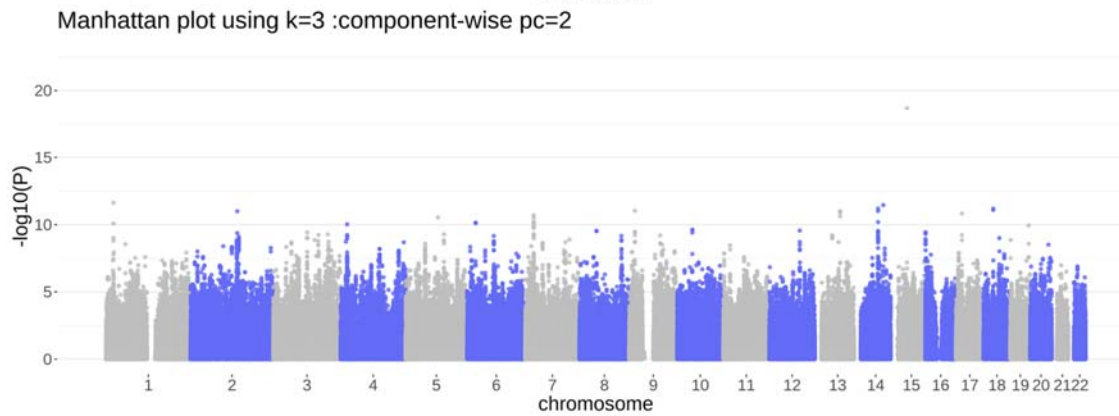

4568

4569

4570

4571

4572

Figure **S4d.5**. Genome scan using pcadapt k=3. A. Method: mahalanobis distances. Manhattan plot scanning the whole genome. B and C. Component-wise genome scans for component PC1 and component PC2, respectively.

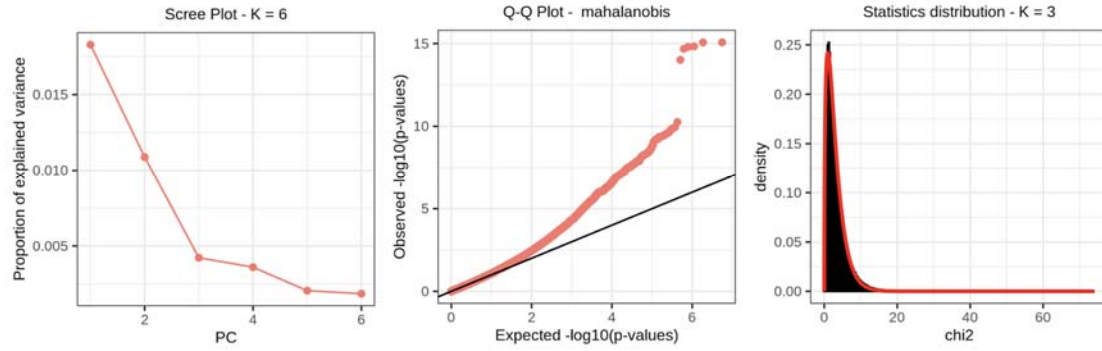

4573  
 4574  
 4575  
 4576  
 4577  
 4578

Figure **S4d.6**. A. Scree plot showing proportion of explained variance of the first PCs in the pcadapt analysis. B. Q-Q plot using mahalanobis method for K=3. Distribution of pcadapt scores (k=3) compared to chi-squared distribution with one degree of freedom (red line).

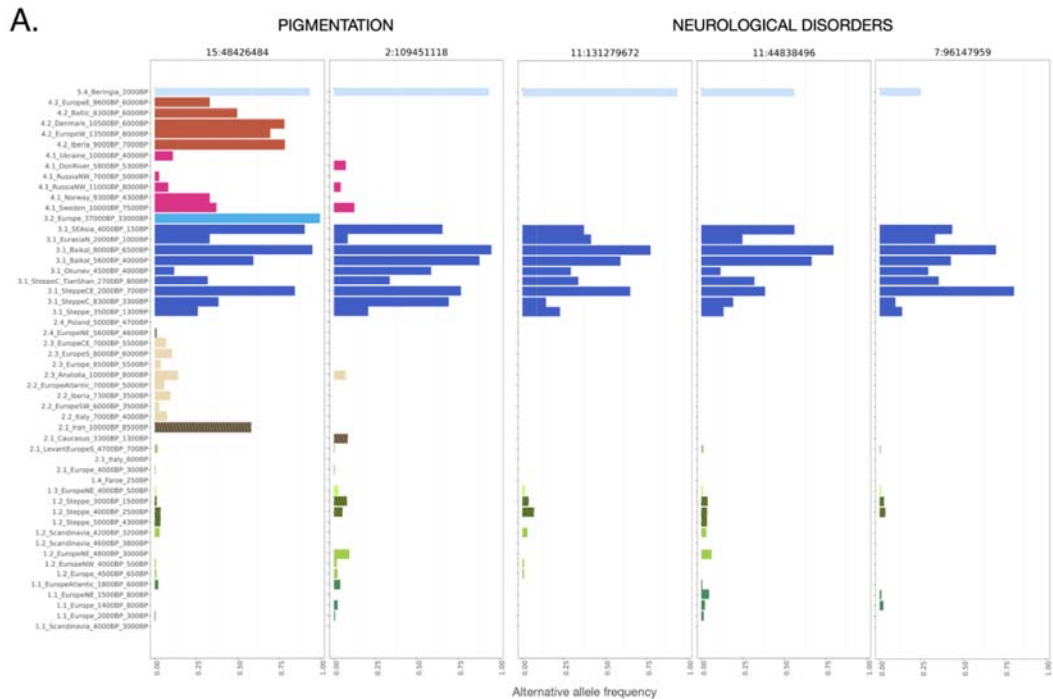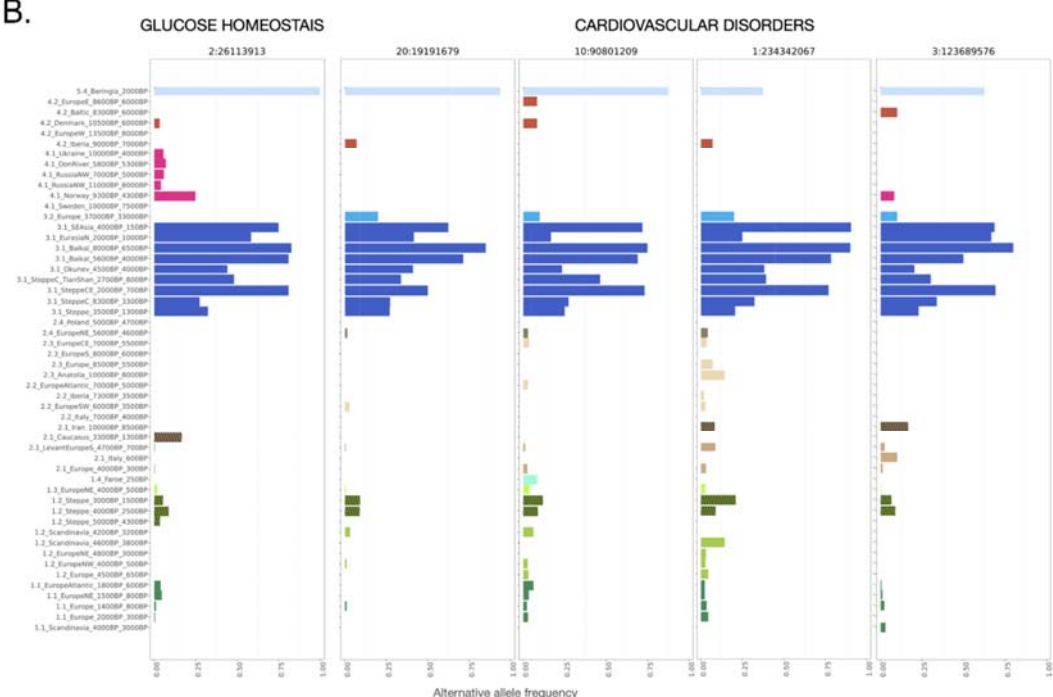

4579  
4580  
4581  
4582  
4583  
4584

Figure **S4d.7**. Alternative allele frequencies of the position with the lowest p-value in the top regions for the eurasian scan.

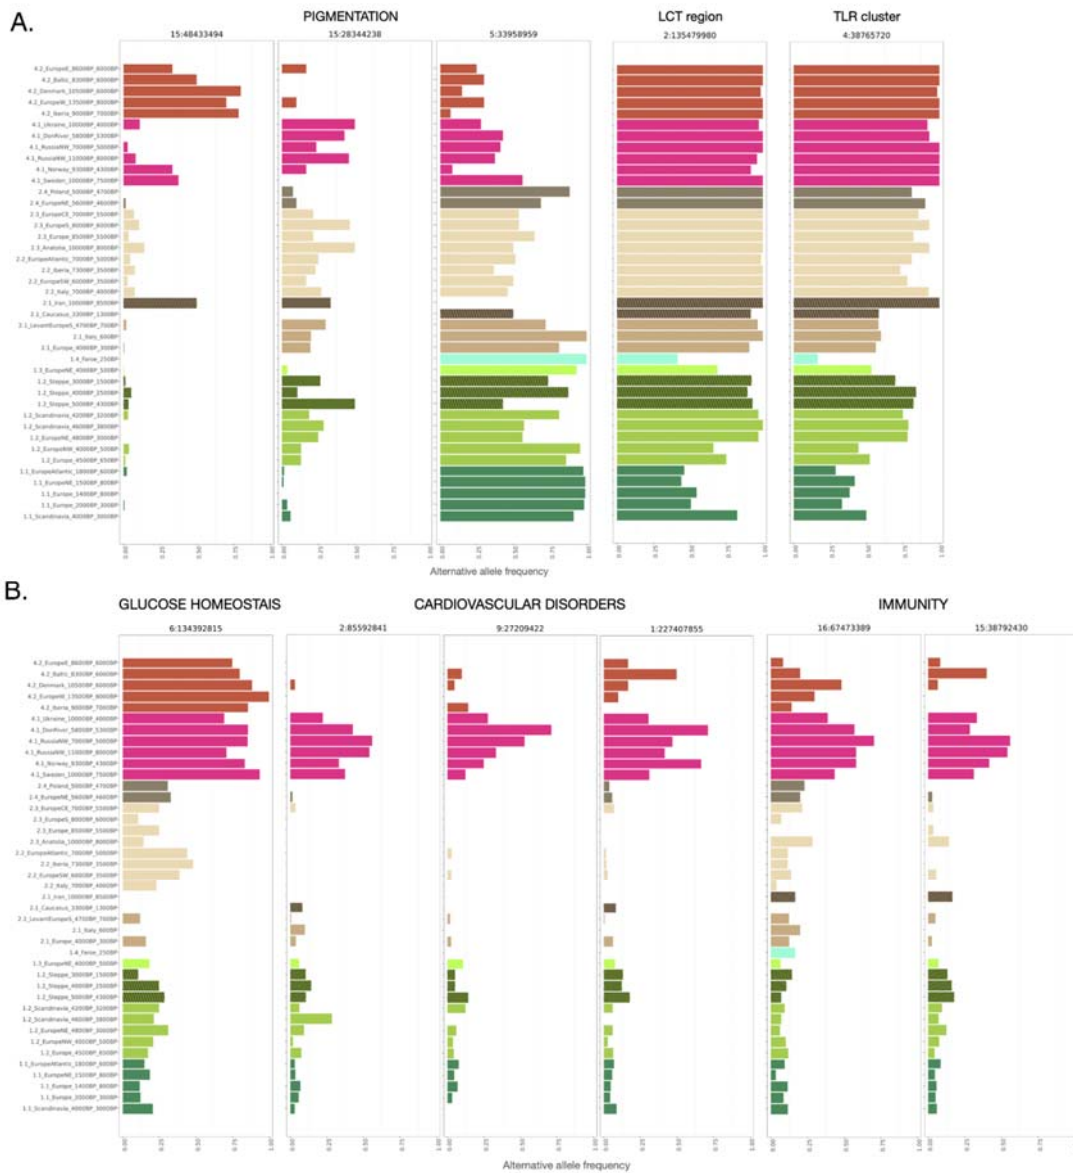

4585  
4586  
4587  
4588  
4589  
4590

Figure **S4d.8**. Alternative allele frequencies of the position with the lowest p-value in the top regions for the West- Eurasian scan.



GLUCOSE AND LIPID METABOLISM

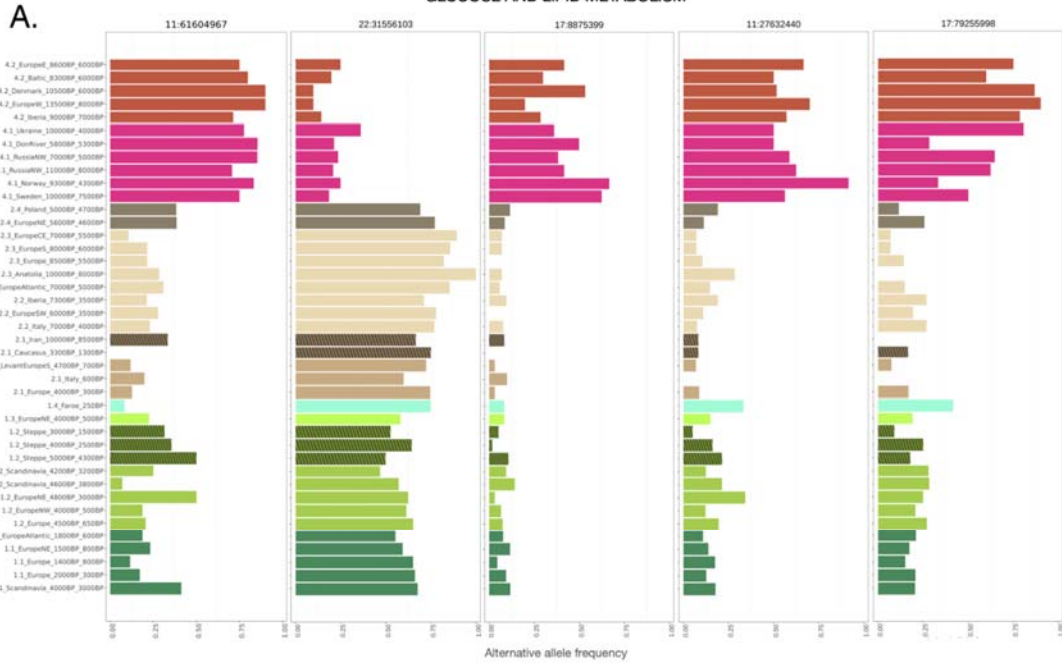

ALCOHOL METABOLISM

IMMUNITY

NEUROLOGICAL DISORDERS

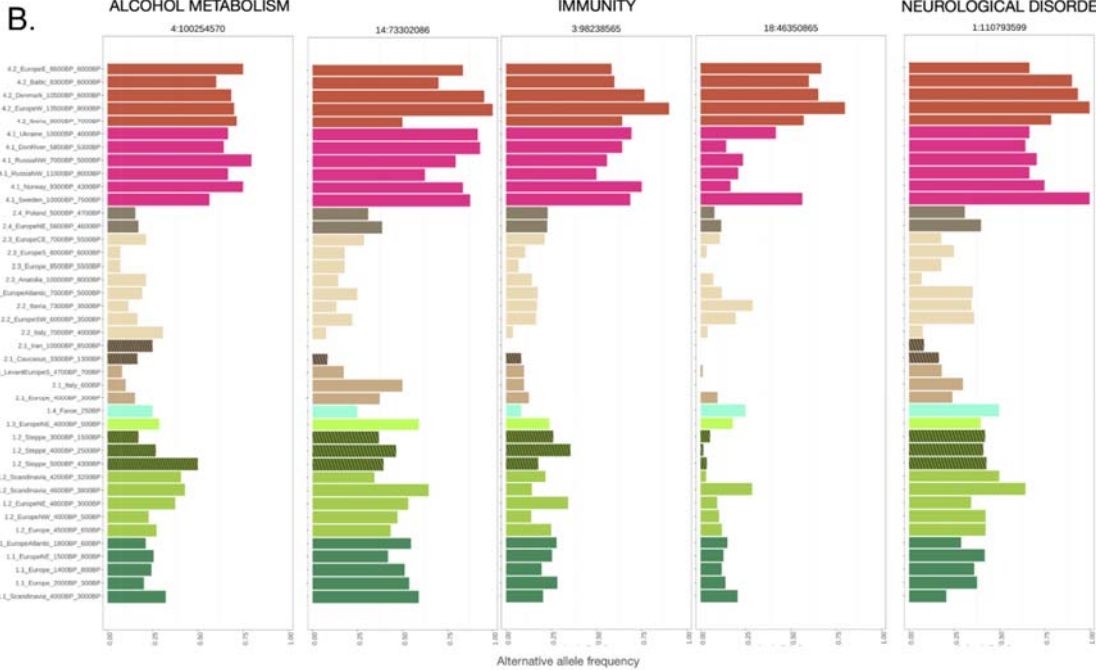

4591  
4592  
4593  
4594  
4595  
4596  
4597

Figure **S4d.9**. Alternative allele frequencies of the position with the lowest p-value in the top regions for the HG West- Eurasian scan.

| chr | start    | end      | bestpos  | minpvalue | ensembl                                                                                              | hgnc                                      | disease_trait_best                                                                                                                                                                                                                                                                                                                                                                                                                                                                                                                                                                                                                                                                                                                                                                                                                                                                                                                                                                                                                                                                                                                                                                                                                                                                                                                                                                      | disease_trait                                                                                                                                                                                                                                                                                                                                                                                                                                                                                                                                                                                                                                                                                                                                                                                                                                                                                                                                                                                                                                                                                                                                                                                                                                                                                              |
|-----|----------|----------|----------|-----------|------------------------------------------------------------------------------------------------------|-------------------------------------------|-----------------------------------------------------------------------------------------------------------------------------------------------------------------------------------------------------------------------------------------------------------------------------------------------------------------------------------------------------------------------------------------------------------------------------------------------------------------------------------------------------------------------------------------------------------------------------------------------------------------------------------------------------------------------------------------------------------------------------------------------------------------------------------------------------------------------------------------------------------------------------------------------------------------------------------------------------------------------------------------------------------------------------------------------------------------------------------------------------------------------------------------------------------------------------------------------------------------------------------------------------------------------------------------------------------------------------------------------------------------------------------------|------------------------------------------------------------------------------------------------------------------------------------------------------------------------------------------------------------------------------------------------------------------------------------------------------------------------------------------------------------------------------------------------------------------------------------------------------------------------------------------------------------------------------------------------------------------------------------------------------------------------------------------------------------------------------------------------------------------------------------------------------------------------------------------------------------------------------------------------------------------------------------------------------------------------------------------------------------------------------------------------------------------------------------------------------------------------------------------------------------------------------------------------------------------------------------------------------------------------------------------------------------------------------------------------------------|
| 15  | 48211821 | 48714309 | 48426484 | 4.40E-25  | ENSG00000188467, ENSG00000104177, ENSG00000233932, ENSG00000074803, ENSG00000128951, ENSG00000166147 | SLC24A5, MYEF2, CTXN2, SLC12A1, DUT, FBN1 | ENSG00000188467: Hair color, Skin pigmentation, Body mass index, Skin, hair and eye pigmentation (multivariate analysis), Eye color, Eye color (brightness), Eye color (saturation), Iris color (a* coordinate), Eye color (brightness), Iris color (saturation), Iris color (a* coordinate), Skin reflectance (Melanin index), Iris color (b* coordinate); ENSG00000104177: Skin pigmentation, Hair color; ENSG00000233932: ; ENSG00000074803: Systemic lupus erythematosus, Longevity, Skin reflectance (Melanin index), Lymphocyte counts; ENSG00000128951: Protein quantitative trait loci; ENSG00000166147: Breast cancer, Spherical equivalent (joint analysis main effects and education interaction), Height, Pulse pressure, Refractive error, Spherical equivalent, Systolic blood pressure, Thoracic aortic aneurysms and dissections, Colorectal cancer, Spherical equivalent or myopia (age of diagnosis), Central corneal thickness, Intracranial, abdominal aortic or thoracic aortic aneurysm (pleiotropy), Systolic blood pressure x alcohol consumption interaction (2df test), Pulse pressure x alcohol consumption interaction (2df test), Skin reflectance (Melanin index), Spontaneous coronary artery dissection, Waist circumference adjusted for body mass index, Intraocular pressure, Macular thickness, Heel bone mineral density, Lung function (FEV1/FVC) | ENSG00000188467: Hair color, Skin pigmentation, Body mass index, Skin, hair and eye pigmentation (multivariate analysis), Eye color, Eye color (brightness), Eye color (saturation), Iris color (a* coordinate), Skin reflectance (Melanin index), Iris color (b* coordinate); ENSG00000104177: Skin pigmentation, Hair color; ENSG00000233932: ; ENSG00000074803: Systemic lupus erythematosus, Longevity, Skin reflectance (Melanin index), Lymphocyte counts; ENSG00000128951: Protein quantitative trait loci; ENSG00000166147: Breast cancer, Spherical equivalent (joint analysis main effects and education interaction), Height, Pulse pressure, Refractive error, Spherical equivalent, Systolic blood pressure, Thoracic aortic aneurysms and dissections, Colorectal cancer, Spherical equivalent or myopia (age of diagnosis), Central corneal thickness, Intracranial, abdominal aortic or thoracic aortic aneurysm (pleiotropy), Systolic blood pressure x alcohol consumption interaction (2df test), Pulse pressure x alcohol consumption interaction (2df test), Skin reflectance (Melanin index), Spontaneous coronary artery dissection, Waist circumference adjusted for body mass index, Intraocular pressure, Macular thickness, Heel bone mineral density, Lung function (FEV1/FVC) |
| 2   | 25874547 | 26568094 | 26113913 | 4.68E-16  | ENSG00000138101, ENSG00000138101                                                                     | DTNB, ASXL2                               | ENSG00000084731: Atrial fibrillation, Type 2 diabetes, Height, Red blood cell count                                                                                                                                                                                                                                                                                                                                                                                                                                                                                                                                                                                                                                                                                                                                                                                                                                                                                                                                                                                                                                                                                                                                                                                                                                                                                                     | ENSG00000138101: Multiple myeloma, LDL cholesterol, Multiple myeloma (IgH translocation), Type 2 diabetes, Cutaneous                                                                                                                                                                                                                                                                                                                                                                                                                                                                                                                                                                                                                                                                                                                                                                                                                                                                                                                                                                                                                                                                                                                                                                                       |

|    |          |          |                      |          |                                                                                                                              |                                                                                                |                                                                                                                                                                                                                                                                                                                                                                                                                                                                                                                                                   |                                                                                                                                                                                                                                                                                                                                                                                                                                                                                                                                                                                                                                                                                                                                                                                                                                                                                                                                                                          |
|----|----------|----------|----------------------|----------|------------------------------------------------------------------------------------------------------------------------------|------------------------------------------------------------------------------------------------|---------------------------------------------------------------------------------------------------------------------------------------------------------------------------------------------------------------------------------------------------------------------------------------------------------------------------------------------------------------------------------------------------------------------------------------------------------------------------------------------------------------------------------------------------|--------------------------------------------------------------------------------------------------------------------------------------------------------------------------------------------------------------------------------------------------------------------------------------------------------------------------------------------------------------------------------------------------------------------------------------------------------------------------------------------------------------------------------------------------------------------------------------------------------------------------------------------------------------------------------------------------------------------------------------------------------------------------------------------------------------------------------------------------------------------------------------------------------------------------------------------------------------------------|
|    |          |          | (rs78404020)         |          | 43970, ENSG00000084731, ENSG00000084733, ENSG00000157833, ENSG00000084754, ENSG00000138029, ENSG00000173567, ENSG00000138018 | <b>KIF3C,</b><br>RAB10,<br>,<br>GARE<br>ML,<br>HADH<br>A,<br>HADH<br>B,<br>GPR1<br>13,<br>EPT1 |                                                                                                                                                                                                                                                                                                                                                                                                                                                                                                                                                   | malignant melanoma, Nevus count or cutaneous melanoma, B-cell malignancies (chronic lymphocytic leukemia, Hodgkin lymphoma or multiple myeloma) (pleiotropy), C-reactive protein levels, Response to platinum-based chemotherapy (cisplatin), Waist circumference adjusted for body mass index, Body mass index, Height; ENSG00000143970: CTACK levels, Hemoglobin levels, Red cell distribution width, Hemoglobin concentration, Thyroid stimulating hormone levels, Alcohol consumption (drinks per week) (MTAG), Hair colour, Mean corpuscular hemoglobin; ENSG00000084731: Atrial fibrillation, Type 2 diabetes, Height, Red blood cell count; ENSG00000084733: Immune response to smallpox vaccine (IL-6), Mean corpuscular volume, Apolipoprotein B levels, Mean corpuscular hemoglobin; ENSG00000157833: Red cell distribution width; ENSG00000084754: ; ENSG00000138029: ; ENSG00000173567: ; ENSG00000138018: Coronary artery disease, Apolipoprotein A1 levels |
| 20 | 18991679 | 19454079 | 19191679 (rs4141981) | 6.92E-16 | ENSG00000185052                                                                                                              | SLC24A3                                                                                        | ENSG00000185052: Matrix metalloproteinase levels, Pulmonary function decline, Age at smoking initiation in chronic obstructive pulmonary disease, Metabolite levels, QT interval (sulfonylurea treatment interaction), Migraine, Pulse pressure, Smoking status (ever vs never smokers), Cataracts (operation), Mean platelet volume, Diastolic blood pressure, Lifetime smoking index, Psychosis (atypical), Daytime sleepiness, Nicotine dependence and major depression (severity of comorbidity), Nicotine dependence symptom count, Platelet | ENSG00000185052: Matrix metalloproteinase levels, Pulmonary function decline, Age at smoking initiation in chronic obstructive pulmonary disease, Metabolite levels, QT interval (sulfonylurea treatment interaction), Migraine, Pulse pressure, Smoking status (ever vs never smokers), Cataracts (operation), Mean platelet volume, Diastolic blood pressure, Lifetime smoking index, Psychosis (atypical), Daytime sleepiness, Nicotine dependence and major depression (severity of comorbidity), Nicotine dependence symptom count, Platelet                                                                                                                                                                                                                                                                                                                                                                                                                        |

|   |           |           |                           |          |                                                                                                                                                                                                     |                                                                                                          |                                                                                                                                                                                                                                                                                                                                                                                                                                        |                                                                                                                                                                                                                                                                                                                                                                                                                                                                                                                                                                                                                                                                                                                                                                                                                                                        |
|---|-----------|-----------|---------------------------|----------|-----------------------------------------------------------------------------------------------------------------------------------------------------------------------------------------------------|----------------------------------------------------------------------------------------------------------|----------------------------------------------------------------------------------------------------------------------------------------------------------------------------------------------------------------------------------------------------------------------------------------------------------------------------------------------------------------------------------------------------------------------------------------|--------------------------------------------------------------------------------------------------------------------------------------------------------------------------------------------------------------------------------------------------------------------------------------------------------------------------------------------------------------------------------------------------------------------------------------------------------------------------------------------------------------------------------------------------------------------------------------------------------------------------------------------------------------------------------------------------------------------------------------------------------------------------------------------------------------------------------------------------------|
|   |           |           |                           |          |                                                                                                                                                                                                     |                                                                                                          | smoking index, Psychosis (atypical), Daytime sleepiness, Nicotine dependence and major depression (severity of comorbidity), Nicotine dependence symptom count, Platelet count, Multisite chronic pain, Breast cancer and/or colorectal cancer, Educational attainment (years of education), Educational attainment (MTAG), Highest math class taken (MTAG), Height, Menarche (age at onset), Lung function (FEV1/FVC), Smoking status | count, Multisite chronic pain, Breast cancer and/or colorectal cancer, Educational attainment (years of education), Educational attainment (MTAG), Highest math class taken (MTAG), Height, Menarche (age at onset), Lung function (FEV1/FVC), Smoking status                                                                                                                                                                                                                                                                                                                                                                                                                                                                                                                                                                                          |
| 2 | 108527043 | 109781319 | 109451118<br>(rs72627476) | 7.39E-15 | ENSG00000115665,<br>ENSG00000196228,<br>ENSG00000198203,<br>ENSG00000198075,<br>ENSG00000135968,<br>ENSG00000169756,<br>ENSG00000153201,<br>ENSG00000163006,<br>ENSG00000135960,<br>ENSG00000172985 | SLC5A7,<br>SULT1C3,<br>SULT1C2,<br>SULT1C4,<br>GCC2,<br>LIMS1,<br>RANBP2,<br>CCDC138,<br>EDAR,<br>SH3RF3 | ENSG00000163006: Lobe attachment (rater scored), Birth weight                                                                                                                                                                                                                                                                                                                                                                          | ENSG00000115665: ; ENSG00000196228: Systolic blood pressure, Diastolic blood pressure; ENSG00000198203: Lobe size; ENSG00000198075: Ear protrusion, Lobe attachment, Helix rolling, Lobe attachment (rater-scored or self-reported), Lobe attachment (rater scored); ENSG00000135968: Low density lipoprotein cholesterol levels; ENSG00000169756: LDL cholesterol levels, Apolipoprotein B levels, Low density lipoprotein cholesterol levels, Excessive hairiness, Monocyte chemoattractant protein-1 levels, Total cholesterol levels, LDL cholesterol, Eyebrow thickness, Birth weight, Corneal endothelial cell density; ENSG00000153201: Attention deficit hyperactivity disorder; ENSG00000163006: Lobe attachment (rater scored), Birth weight; ENSG00000135960: Monobrow thickness, Scalp hair shape, Beard thickness, Eyebrow thickness, Ear |

|   |           |           |           |          |                                  |             |                  |                                                                                                                                                                                                                                                                                                                                                                                                                                                                                                                                                                                                                                                                                                                                                                                                                                                                                    |
|---|-----------|-----------|-----------|----------|----------------------------------|-------------|------------------|------------------------------------------------------------------------------------------------------------------------------------------------------------------------------------------------------------------------------------------------------------------------------------------------------------------------------------------------------------------------------------------------------------------------------------------------------------------------------------------------------------------------------------------------------------------------------------------------------------------------------------------------------------------------------------------------------------------------------------------------------------------------------------------------------------------------------------------------------------------------------------|
|   |           |           |           |          |                                  |             |                  | <p>protrusion, Tragus size, Ear morphology, Lobe size, Lobe attachment, Helix rolling, lower facial morphology traits (quantitative measurement), Lobe attachment (rater scored), Straight vs curly hair, Blood protein levels, Gamma glutamyl transferase levels in excessive alcohol consumption, Male-pattern baldness, Monobrow, Thick vs thin eyebrows, Lung function (FEV1), Lung function (FVC), Balding type 1, Hair color;<br/> ENSG00000172985: Neurocognitive impairment in HIV-1 infection (dichotomous), Height, Cerebrospinal fluid sTREM-2 levels, Heel bone mineral density, Pediatric bone mineral density (spine), Bitter taste perception (6-n-propylthiouracil) in obesity with metabolic syndrome, Interleukin-5 levels, General cognitive ability, Rapid automatised naming of digits, Corneal endothelial cell density, Highest math class taken (MTAG)</p> |
| 3 | 106950936 | 107415936 | 107150936 | 6.02E-13 | ENSG00000138483, ENSG00000114439 | CCDC54, BBX | ENSG00000138483: | <p>ENSG00000138483 ; ENSG00000114439: Smoking behaviour, Metabolite levels, Neuroticism, Irritable mood, Experiencing mood swings, Feeling worry, Male-pattern baldness, Depressed affect, Neuroticism, Waist-to-hip ratio adjusted for BMI (adjusted for smoking behaviour), Waist-to-hip ratio adjusted for BMI, Measles, Small cell lung carcinoma, Body mass index, Mood instability, Waist-hip ratio, White blood cell count, Neutrophil count, Platelet count, General cognitive ability, Multisite chronic pain, Monocyte count, Mean platelet volume, Cognitive ability, years of educational attainment or schizophrenia (pleiotropy), Educational attainment (MTAG), Cognitive performance (MTAG), Height, Balding type</p>                                                                                                                                              |

|        |               |               |               |              |                     |     |                                                                                                                                                                                                                                                                                                                                                                                                                                                                                                                                                                                                                                                                                                                                                                                                                                                                                                                                                                                               |                                                                                                                                                                                                                                                                                                                                                                                                                                                                                                                                                                                                                                                                                                                                                                                                                                                                                                                                                                                                                                                                                                                                                                                                                                                                                                                                                                                                                                                                                                                   |
|--------|---------------|---------------|---------------|--------------|---------------------|-----|-----------------------------------------------------------------------------------------------------------------------------------------------------------------------------------------------------------------------------------------------------------------------------------------------------------------------------------------------------------------------------------------------------------------------------------------------------------------------------------------------------------------------------------------------------------------------------------------------------------------------------------------------------------------------------------------------------------------------------------------------------------------------------------------------------------------------------------------------------------------------------------------------------------------------------------------------------------------------------------------------|-------------------------------------------------------------------------------------------------------------------------------------------------------------------------------------------------------------------------------------------------------------------------------------------------------------------------------------------------------------------------------------------------------------------------------------------------------------------------------------------------------------------------------------------------------------------------------------------------------------------------------------------------------------------------------------------------------------------------------------------------------------------------------------------------------------------------------------------------------------------------------------------------------------------------------------------------------------------------------------------------------------------------------------------------------------------------------------------------------------------------------------------------------------------------------------------------------------------------------------------------------------------------------------------------------------------------------------------------------------------------------------------------------------------------------------------------------------------------------------------------------------------|
|        |               |               |               |              |                     |     |                                                                                                                                                                                                                                                                                                                                                                                                                                                                                                                                                                                                                                                                                                                                                                                                                                                                                                                                                                                               | 1, Educational attainment (years of education), Highest math class taken (MTAG)                                                                                                                                                                                                                                                                                                                                                                                                                                                                                                                                                                                                                                                                                                                                                                                                                                                                                                                                                                                                                                                                                                                                                                                                                                                                                                                                                                                                                                   |
| 1<br>1 | 1310773<br>65 | 13151<br>6733 | 13127<br>9672 | 7.74E-<br>13 | ENSG000001<br>82667 | NTM | ENSG00000182667: Bipolar disorder and schizophrenia, Sunburns, Obesity-related traits, Male fertility, Asperger disorder, Educational attainment (years of education), Aggressiveness in attention deficit hyperactivity disorder, Itch intensity from mosquito bite adjusted by bite size, Food addiction, Feeling worry, Refractive error, Smoking status (ever vs never smokers), Leisure sedentary behaviour (television watching), Leisure sedentary behaviour (computer use), Spherical equivalent, Myopia, Cardiac Troponin-T levels, Chronic obstructive pulmonary disease-related biomarkers, Metabolite levels, Serum polyunsaturated fatty acid concentration x sex interaction in metabolic syndrome, Myopia (age of diagnosis), Spherical equivalent or myopia (age of diagnosis), Plasma anti-thyroglobulin levels, C-reactive protein levels, Schizophrenia, Peripheral arterial disease (traffic-related air pollution interaction), Body mass index, Intake of total sugars, | ENSG00000182667: Bipolar disorder and schizophrenia, Sunburns, Obesity-related traits, Male fertility, Asperger disorder, Educational attainment (years of education), Aggressiveness in attention deficit hyperactivity disorder, Itch intensity from mosquito bite adjusted by bite size, Food addiction, Feeling worry, Refractive error, Smoking status (ever vs never smokers), Leisure sedentary behaviour (television watching), Leisure sedentary behaviour (computer use), Spherical equivalent, Myopia, Cardiac Troponin-T levels, Chronic obstructive pulmonary disease-related biomarkers, Metabolite levels, Serum polyunsaturated fatty acid concentration x sex interaction in metabolic syndrome, Myopia (age of diagnosis), Spherical equivalent or myopia (age of diagnosis), Plasma anti-thyroglobulin levels, C-reactive protein levels, Schizophrenia, Peripheral arterial disease (traffic-related air pollution interaction), Body mass index, Intake of total sugars, Familial lung adenocarcinoma, Mental health study participation (completed survey), Reaction time, Smoking initiation (ever regular vs never regular), Age of smoking initiation (MTAG), Cognitive ability, years of educational attainment or schizophrenia (pleiotropy), Smoking initiation (ever regular vs never regular) (MTAG), Pre-treatment viral load in HIV-1 infection, Educational attainment (MTAG), Highest math class taken (MTAG), Smoking status, White blood cell count, Lung function (FEV1/FVC) |

|   |           |           |                        |          |                                                                    |                                    |                                                                                                                                                                                                                                                                                                                                                                                                                                                                                                                                                                                                                                                                                                                                                                                                                                 |  |
|---|-----------|-----------|------------------------|----------|--------------------------------------------------------------------|------------------------------------|---------------------------------------------------------------------------------------------------------------------------------------------------------------------------------------------------------------------------------------------------------------------------------------------------------------------------------------------------------------------------------------------------------------------------------------------------------------------------------------------------------------------------------------------------------------------------------------------------------------------------------------------------------------------------------------------------------------------------------------------------------------------------------------------------------------------------------|--|
|   |           |           |                        |          |                                                                    |                                    | <p>Familial lung adenocarcinoma, Mental health study participation (completed survey), Reaction time, Smoking initiation (ever regular vs never regular), Age of smoking initiation (MTAG), Cognitive ability, years of educational attainment or schizophrenia (pleiotropy), Smoking initiation (ever regular vs never regular) (MTAG), Pre-treatment viral load in HIV-1 infection, Educational attainment (MTAG), Highest math class taken (MTAG), Smoking status, White blood cell count, Lung function (FEV1/FVC)</p>                                                                                                                                                                                                                                                                                                      |  |
| 3 | 123433220 | 123889576 | 123689576 (rs55935332) | 3.47E-12 | ENSG00000065534, ENSG00000175455, ENSG00000065371, ENSG00000160145 | MYLK, CCDC14, <b>ROPN1</b> , KALRN | <p>ENSG00000065371: ENSG00000065534: Adolescent idiopathic scoliosis, General cognitive ability, Cognitive empathy, Educational attainment (MTAG), Educational attainment (years of education); ENSG00000175455: Intelligence (MTAG), Drug-induced liver injury (fluoroquinolones), General cognitive ability; ENSG00000065371: ; ENSG00000160145: Mean platelet volume, Platelet count, Post bronchodilator FEV1/FVC ratio, Plateletcrit, Schizophrenia, Systolic blood pressure x dichotomous lifestyle risk score interaction (1df test), Systolic blood pressure x dichotomous lifestyle risk score interaction (2df test), Intraocular pressure, Moderate-to-late spontaneous preterm birth, Heschl's gyrus morphology, PR interval in Tripanosoma cruzi seropositivity, Thyroid peroxidase antibody levels, Aspartate</p> |  |

|    |          |          |          |          |                 |        |                                                                                                                                                                                                                                                                                                                                                                                                                                                                                                                                                                                    |                                                                                                                                                                                                                                                                                                                                                                                                                                                                                                                                                                                                                                                                                                                                                                                                                                                                                                                |
|----|----------|----------|----------|----------|-----------------|--------|------------------------------------------------------------------------------------------------------------------------------------------------------------------------------------------------------------------------------------------------------------------------------------------------------------------------------------------------------------------------------------------------------------------------------------------------------------------------------------------------------------------------------------------------------------------------------------|----------------------------------------------------------------------------------------------------------------------------------------------------------------------------------------------------------------------------------------------------------------------------------------------------------------------------------------------------------------------------------------------------------------------------------------------------------------------------------------------------------------------------------------------------------------------------------------------------------------------------------------------------------------------------------------------------------------------------------------------------------------------------------------------------------------------------------------------------------------------------------------------------------------|
|    |          |          |          |          |                 |        |                                                                                                                                                                                                                                                                                                                                                                                                                                                                                                                                                                                    | aminotransferase levels in low alcohol consumption, Hematocrit, Platelet distribution width, Amyotrophic lateral sclerosis, Acute graft versus host disease in bone marrow transplantation (donor effect), Childhood steroid-sensitive nephrotic syndrome, Diffuse large B-cell lymphoma or systemic lupus erythematosus, Marginal zone lymphoma or systemic lupus erythematosus, Longevity (age >99th survival percentile), Red blood cell count, Benign childhood epilepsy with centro-temporal spikes, Lymphocyte counts, Childhood ALL/LBL (acute lymphoblastic leukemia/lymphoblastic lymphoma) treatment-related venous thromboembolism, Mean corpuscular hemoglobin concentration, General cognitive ability, Monocyte count, Urine pH measurement, Low urine pH, Educational attainment (MTAG), Cognitive performance (MTAG), Educational attainment (years of education), Red cell distribution width |
| 10 | 78689487 | 79110042 | 78889487 | 1.62E-11 | ENSG00000156113 | KCNMA1 | ENSG00000156113: Glucocorticoid-induced osteonecrosis, Lean body mass, Angioedema in response to angiotensin-converting enzyme inhibitor and/or angiotensin receptor blocker, Refractive error, Spherical equivalent, Myopia, Hypospadias, Obesity, Myopia (age of diagnosis), Non-melanoma skin cancer, Spherical equivalent or myopia (age of diagnosis), Male-pattern baldness, Initial pursuit acceleration, Educational attainment, Blood pressure, Mumps, Estimated glomerular filtration rate, Body mass index, Response to ranibizumab in age-related macular degeneration | ENSG00000156113: Glucocorticoid-induced osteonecrosis, Lean body mass, Angioedema in response to angiotensin-converting enzyme inhibitor and/or angiotensin receptor blocker, Refractive error, Spherical equivalent, Myopia, Hypospadias, Obesity, Myopia (age of diagnosis), Non-melanoma skin cancer, Spherical equivalent or myopia (age of diagnosis), Male-pattern baldness, Initial pursuit acceleration, Educational attainment, Blood pressure, Mumps, Estimated glomerular filtration rate, Body mass index, Response to ranibizumab in age-related macular degeneration                                                                                                                                                                                                                                                                                                                             |



|    |           |           |           |          |                                                                                      |                                         |                                                                                                                                                                                                                                                                                                                                                                                                      |                                                                                                                                                                                                                                                                                                                                                                                                                                                                      |
|----|-----------|-----------|-----------|----------|--------------------------------------------------------------------------------------|-----------------------------------------|------------------------------------------------------------------------------------------------------------------------------------------------------------------------------------------------------------------------------------------------------------------------------------------------------------------------------------------------------------------------------------------------------|----------------------------------------------------------------------------------------------------------------------------------------------------------------------------------------------------------------------------------------------------------------------------------------------------------------------------------------------------------------------------------------------------------------------------------------------------------------------|
|    |           |           |           |          |                                                                                      |                                         | <p>pursuit acceleration, Educational attainment, Blood pressure, Mumps, Estimated glomerular filtration rate, Body mass index, Response to ranibizumab in age-related macular degeneration (exudative), Smoking cessation in chronic obstructive pulmonary disease, DNA methylation variation (age effect), Heart rate in heart failure with reduced ejection fraction, Balding type 1, Height</p>   | <p>(exudative), Smoking cessation in chronic obstructive pulmonary disease, DNA methylation variation (age effect), Heart rate in heart failure with reduced ejection fraction, Balding type 1, Height</p>                                                                                                                                                                                                                                                           |
| 1  | 234142067 | 234549596 | 234342067 | 3.07E-11 | ENSG00000183780, ENSG00000168275, ENSG00000059588                                    | SLC35F3, COA6, TARBP1                   | <p>ENSG00000183780: Post bronchodilator FEV1/FVC ratio, Epstein-Barr virus copy number in lymphoblastoid cell lines, Trunk fat mass, Creatinine levels, Metabolite levels, Intracranial aneurysm, Pediatric bone mineral content (spine), Interleukin-6 levels, Chronic obstructive pulmonary disease or high blood pressure (pleiotropy), Adolescent idiopathic scoliosis, Diverticular disease</p> | <p>ENSG00000183780: Post bronchodilator FEV1/FVC ratio, Epstein-Barr virus copy number in lymphoblastoid cell lines, Trunk fat mass, Creatinine levels, Metabolite levels, Intracranial aneurysm, Pediatric bone mineral content (spine), Interleukin-6 levels, Chronic obstructive pulmonary disease or high blood pressure (pleiotropy), Adolescent idiopathic scoliosis, Diverticular disease; ENSG00000168275: ; ENSG00000059588: Cognitive test performance</p> |
| 17 | 44595190  | 45055683  | 44802774  | 3.52E-11 | ENSG00000238083, ENSG00000185829, ENSG00000073969, ENSG00000108379, ENSG00000158955, | LRR37A2, ARL17A, NSF, WNT3, WNT9B, GOSR | <p>ENSG00000073969: Ovarian cancer in BRCA1 mutation carriers, Parkinson's disease, Sense of smell, Intelligence</p>                                                                                                                                                                                                                                                                                 | <p>ENSG00000238083: ; ENSG00000185829: Hemoglobin levels, Reaction time, Red cell distribution width, Handedness (Left-handed vs. non-left-handed), Handedness (Right-handed vs. non-right-handed), Mean corpuscular hemoglobin concentration, General cognitive ability, Monocyte count; ENSG00000073969: Ovarian cancer in BRCA1 mutation carriers, Parkinson's disease, Sense of smell, Intelligence</p>                                                          |

|  |  |  |  |  |                                  |           |                                                                                                                                                                                                                                                                                                                                                                                                                                                                                                                                                                                                                                                                                |                                                                                                                                                                                                                                                                                                                                                                                                                                                                                                                                                                                                                                                                                                                                                                                                                                                                                                                                                                                                                                                                                                                                                                                                                                                                                                                                                                                                                                                                                                                                                                                                                                                          |
|--|--|--|--|--|----------------------------------|-----------|--------------------------------------------------------------------------------------------------------------------------------------------------------------------------------------------------------------------------------------------------------------------------------------------------------------------------------------------------------------------------------------------------------------------------------------------------------------------------------------------------------------------------------------------------------------------------------------------------------------------------------------------------------------------------------|----------------------------------------------------------------------------------------------------------------------------------------------------------------------------------------------------------------------------------------------------------------------------------------------------------------------------------------------------------------------------------------------------------------------------------------------------------------------------------------------------------------------------------------------------------------------------------------------------------------------------------------------------------------------------------------------------------------------------------------------------------------------------------------------------------------------------------------------------------------------------------------------------------------------------------------------------------------------------------------------------------------------------------------------------------------------------------------------------------------------------------------------------------------------------------------------------------------------------------------------------------------------------------------------------------------------------------------------------------------------------------------------------------------------------------------------------------------------------------------------------------------------------------------------------------------------------------------------------------------------------------------------------------|
|  |  |  |  |  | ENSG00000108433, ENSG00000179673 | 2, RPRM L | <p>Cortical surface area (global PC1), Parkinson's disease or first degree relation to individual with Parkinson's disease, Brain region volumes, Hemoglobin levels, Intelligence, Male-pattern baldness, Worry, White matter microstructure (axial diuivities), Reaction time, White matter microstructure (mean diuivities), Epithelial ovarian cancer, Thyroid stimulating hormone levels, Cortical surface area, General factor of neuroticism, Smoking initiation (ever regular vs never regular), White matter microstructure (radial diuivities), White matter microstructure (fractional anisotropy), General cognitive ability, Macular thickness, Balding type 1</p> | <p>(MTAG), Neuroticism, Neurociticism, Feeling miserable, Experiencing mood swings, Feeling hurt, Feeling fed-up, Feeling nervous, Feeling worry, Cortical surface area (global PC1), Parkinson's disease or first degree relation to individual with Parkinson's disease, Brain region volumes, Hemoglobin levels, Intelligence, Male-pattern baldness, Worry, White matter microstructure (axial diuivities), Reaction time, White matter microstructure (mean diuivities), Epithelial ovarian cancer, Thyroid stimulating hormone levels, Cortical surface area, General factor of neuroticism, Smoking initiation (ever regular vs never regular), White matter microstructure (radial diuivities), White matter microstructure (fractional anisotropy), General cognitive ability, Macular thickness, Balding type 1; ENSG00000108379: Parkinson's disease, Celiac disease, Post bronchodilator FEV1, Hematocrit, Intelligence (MTAG), Coronary artery disease, Irritable mood, Neuroticism, Feeling guilty, Experiencing mood swings, Feeling hurt, Cortical surface area (global PC1), Parkinson's disease or first degree relation to individual with Parkinson's disease, Red blood cell count, Multiple system atrophy, Cognitive function, Alzheimer's disease in APOE e4-carriers, Hemoglobin levels, Depressed affect, Male-pattern baldness, White matter microstructure (axial diuivities), Hemoglobin concentration, Breast cancer, Itch intensity from mosquito bite adjusted by bite size, Handedness (non-right-handed vs right-handed), Handedness (Left-handed vs. non-left-handed), Handedness (left-handed vs. right-handed),</p> |
|--|--|--|--|--|----------------------------------|-----------|--------------------------------------------------------------------------------------------------------------------------------------------------------------------------------------------------------------------------------------------------------------------------------------------------------------------------------------------------------------------------------------------------------------------------------------------------------------------------------------------------------------------------------------------------------------------------------------------------------------------------------------------------------------------------------|----------------------------------------------------------------------------------------------------------------------------------------------------------------------------------------------------------------------------------------------------------------------------------------------------------------------------------------------------------------------------------------------------------------------------------------------------------------------------------------------------------------------------------------------------------------------------------------------------------------------------------------------------------------------------------------------------------------------------------------------------------------------------------------------------------------------------------------------------------------------------------------------------------------------------------------------------------------------------------------------------------------------------------------------------------------------------------------------------------------------------------------------------------------------------------------------------------------------------------------------------------------------------------------------------------------------------------------------------------------------------------------------------------------------------------------------------------------------------------------------------------------------------------------------------------------------------------------------------------------------------------------------------------|

|    |          |          |          |          |                                                                              |                                                          |                                                                                                                                                                                                                                                                                                                                                                                                                                                                                                                                                                                                                                                                                                                                                                                                                                                                                                                                                                                                                                                                                                                                                                                                                                                                                         |                                                                                                                                                                                                                                                                                                                 |
|----|----------|----------|----------|----------|------------------------------------------------------------------------------|----------------------------------------------------------|-----------------------------------------------------------------------------------------------------------------------------------------------------------------------------------------------------------------------------------------------------------------------------------------------------------------------------------------------------------------------------------------------------------------------------------------------------------------------------------------------------------------------------------------------------------------------------------------------------------------------------------------------------------------------------------------------------------------------------------------------------------------------------------------------------------------------------------------------------------------------------------------------------------------------------------------------------------------------------------------------------------------------------------------------------------------------------------------------------------------------------------------------------------------------------------------------------------------------------------------------------------------------------------------|-----------------------------------------------------------------------------------------------------------------------------------------------------------------------------------------------------------------------------------------------------------------------------------------------------------------|
|    |          |          |          |          |                                                                              |                                                          | Alcohol consumption (drinks per week), Reaction time, General factor of neuroticism, Atrial fibrillation, Intracranial volume, Lung function (FEV1), White matter microstructure (radial diffusivities), Lung function (FVC), Waist-to-hip ratio adjusted for BMI, General cognitive ability, Snoring, White matter microstructure (fractional anisotropy), Smoking initiation (ever regular vs never regular) (MTAG), Cognitive performance (MTAG); ENSG00000158955: Antineutrophil cytoplasmic antibody-associated vasculitis, Intraocular pressure, Mean corpuscular hemoglobin; ENSG00000108433: Blood pressure, Systolic blood pressure, Nonsyndromic cleft lip with cleft palate, Mean arterial pressure, Coronary artery disease, Blood urea nitrogen levels, QRS duration, QRS complex (Cornell), Pulse pressure, Hemoglobin levels, Myocardial infarction, Aortic root size, Orofacial clefts, Cleft lip with or without cleft palate, Idiopathic pulmonary fibrosis, Atrial fibrillation, Myocardial fractal dimension (slice 2), Myocardial fractal dimension (slice 3), Myocardial fractal dimension (slice 4), Medication use (agents acting on the renin-angiotensin system), Medication use (calcium channel blockers), Height, Cardiovascular disease; ENSG00000179673: |                                                                                                                                                                                                                                                                                                                 |
| 10 | 90592757 | 91009553 | 90801209 | 4.00E-11 | ENSG00000152766,<br>ENSG00000138134,<br>ENSG00000107796,<br>ENSG00000026103, | ANKR<br>D22,<br>STAM<br>BPL1,<br>ACTA2<br>, FAS,<br>CH25 | ENSG00000026103: Immunoglobulin A, Chronic lymphocytic leukemia, Mosquito bite size, Blood protein levels, Blood protein levels in cardiovascular risk, Juvenile idiopathic arthritis (oligoarticular or rheumatoid                                                                                                                                                                                                                                                                                                                                                                                                                                                                                                                                                                                                                                                                                                                                                                                                                                                                                                                                                                                                                                                                     | ENSG00000152766: Mucinous adenocarcinoma in colorectal cancer, Late-onset Alzheimer's disease, Accelerometer-based physical activity measurement (average acceleration); ENSG00000138134: Lung cancer, Pulse pressure, Brain region volumes; ENSG00000107796: Lung cancer, Pulse pressure, Chronic inflammatory |

|   |           |           |           |          |                                                                                                                        |                                                                           |                                                                                                       |                                                                                                                                                                                                                                                                                                                                                                                                                                                                                                                                                                                                                                                                                                                                                                                                                                                                                                                                                                                                                       |
|---|-----------|-----------|-----------|----------|------------------------------------------------------------------------------------------------------------------------|---------------------------------------------------------------------------|-------------------------------------------------------------------------------------------------------|-----------------------------------------------------------------------------------------------------------------------------------------------------------------------------------------------------------------------------------------------------------------------------------------------------------------------------------------------------------------------------------------------------------------------------------------------------------------------------------------------------------------------------------------------------------------------------------------------------------------------------------------------------------------------------------------------------------------------------------------------------------------------------------------------------------------------------------------------------------------------------------------------------------------------------------------------------------------------------------------------------------------------|
|   |           |           |           |          | ENSG00000138135, ENSG00000107798                                                                                       | H, LIPA                                                                   | factor-negative polyarticular), Ankylosing spondylitis, Mean corpuscular volume, Red blood cell count | diseases (ankylosing spondylitis, Crohn's disease, psoriasis, primary sclerosing cholangitis, ulcerative colitis) (pleiotropy), Chronic lymphocytic leukemia; ENSG00000026103: Immunoglobulin A, Chronic lymphocytic leukemia, Mosquito bite size, Blood protein levels, Blood protein levels in cardiovascular risk, Juvenile idiopathic arthritis (oligoarticular or rheumatoid factor-negative polyarticular), Ankylosing spondylitis, Mean corpuscular volume, Red blood cell count; ENSG00000138135; ; ENSG00000107798: Coronary heart disease, Fibrinogen levels, Coronary artery disease (myocardial infarction, percutaneous transluminal coronary angioplasty, coronary artery bypass grafting, angina or chronic ischemic heart disease), Coronary artery disease, Neutrophil count, Blood protein levels, C-reactive protein levels, Sum neutrophil eosinophil counts, Myocardial infarction, Itch intensity from mosquito bite adjusted by bite size, White blood cell count, Red cell distribution width |
| 2 | 241709643 | 242343441 | 242087712 | 8.54E-11 | ENSG00000130294, ENSG00000172482, ENSG00000172478, ENSG00000162804, ENSG00000122085, ENSG00000115687, ENSG00000115685, | KIF1A, AGXT, C2orf54, SNED1, MTERFD2, PASK, <b>PPP1R7</b> , ANO7, HDLB P, | ENSG00000115685:                                                                                      | ENSG00000130294: Nicotine withdrawal symptom count, Response to placebo treatment in childhood asthma (FVC change), Waist circumference adjusted for body mass index, Self-reported math ability, Height; ENSG00000172482: Blood metabolite levels, Height; ENSG00000172478: Major depressive disorder; ENSG00000162804: Sex hormone-binding globulin levels, Blood protein levels, Growth-regulated protein alpha levels, Pharmacokinetics of antipsychotic drugs in severe mental disorder (concentration drug ratio),                                                                                                                                                                                                                                                                                                                                                                                                                                                                                              |

|        |              |              |              |          |                                                                    |                 |                                                                        |                                                                                                                                                                                                                                                                                                                                                                                                                                                                                                                                                                                                                                                                                                                                                                                                                                                                                                                                                                                                                                                                                                                                                                                                                                                                                                                                                                                                                                                             |
|--------|--------------|--------------|--------------|----------|--------------------------------------------------------------------|-----------------|------------------------------------------------------------------------|-------------------------------------------------------------------------------------------------------------------------------------------------------------------------------------------------------------------------------------------------------------------------------------------------------------------------------------------------------------------------------------------------------------------------------------------------------------------------------------------------------------------------------------------------------------------------------------------------------------------------------------------------------------------------------------------------------------------------------------------------------------------------------------------------------------------------------------------------------------------------------------------------------------------------------------------------------------------------------------------------------------------------------------------------------------------------------------------------------------------------------------------------------------------------------------------------------------------------------------------------------------------------------------------------------------------------------------------------------------------------------------------------------------------------------------------------------------|
|        |              |              |              |          | ENSG00000146205, ENSG00000115677, ENSG00000168385, ENSG00000006607 | SEPT2, FARP2    |                                                                        | Toxicity response to radiotherapy in prostate cancer (hematuria) (time to event), Height; ENSG00000122085: Sex hormone-binding globulin levels, Blood protein levels, Pharmacokinetics of antipsychotic drugs in severe mental disorder (concentration drug ratio); ENSG00000115687: Height; ENSG00000115685: ; ENSG00000146205: Reaction time; ENSG00000115677: Chronic lymphocytic leukemia, Fibrinogen levels, HDL cholesterol levels, Apolipoprotein B levels, Apolipoprotein A1 levels, Male-pattern baldness, Waist circumference adjusted for BMI (adjusted for smoking behaviour), Waist circumference adjusted for BMI (joint analysis main effects and smoking interaction), Waist circumference adjusted for BMI in non-smokers, Waist circumference adjusted for body mass index, Intraocular pressure, Height, Balding type 1, Eosinophil counts; ENSG00000168385: Height, Cerebrospinal fluid immune biomarker levels, Male-pattern baldness, Balding type 1, Lung function (FEV1/FVC); ENSG00000006607: Chronic lymphocytic leukemia, Prostate cancer, Vitiligo, Triglyceride levels, Cerebrospinal fluid immune biomarker levels, Disability (impaired activities of daily living), C-reactive protein levels, Fibrinogen levels, Fibrinogen, Red blood cell count, Low density lipoprotein cholesterol levels, Systolic blood pressure, Educational attainment (MTAG), Educational attainment (years of education), White blood cell count |
| 1<br>1 | 4463476<br>4 | 45073<br>989 | 44838<br>496 | 1.42E-10 | ENSG00000085117, ENSG000001                                        | CD82, TSPA N18, | ENSG00000157570: Schizophrenia, Obstructive sleep apnea trait (average | ENSG00000085117: Hemostatic factors and hematological phenotypes, Red cell distribution width, White matter                                                                                                                                                                                                                                                                                                                                                                                                                                                                                                                                                                                                                                                                                                                                                                                                                                                                                                                                                                                                                                                                                                                                                                                                                                                                                                                                                 |

|        |              |              |              |              |                                                                     |                                                    |                                                                                                                                                         |                                                                                                                                                                                                                                                                                                                                                                                                                                                                                                                                                                                                                                                                                                                                   |
|--------|--------------|--------------|--------------|--------------|---------------------------------------------------------------------|----------------------------------------------------|---------------------------------------------------------------------------------------------------------------------------------------------------------|-----------------------------------------------------------------------------------------------------------------------------------------------------------------------------------------------------------------------------------------------------------------------------------------------------------------------------------------------------------------------------------------------------------------------------------------------------------------------------------------------------------------------------------------------------------------------------------------------------------------------------------------------------------------------------------------------------------------------------------|
|        |              |              |              |              | 57570,<br>ENSG000001<br>75274                                       | TP53I<br>11                                        | respiratory event duration),<br>Intraocular pressure, Cortical<br>brain region measurements<br>(area, volume and thickness)                             | microstructure (axial diuivities), White<br>matter microstructure (mean diuivities),<br>White matter microstructure (radial<br>diuivities), Lymphocyte counts, DNA<br>methylation variation (age effect);<br>ENSG00000157570: Schizophrenia,<br>Obstructive sleep apnea trait (average<br>respiratory event duration), Intraocular<br>pressure, Cortical brain region<br>measurements (area, volume and<br>thickness); ENSG00000175274:                                                                                                                                                                                                                                                                                           |
| 7      | 9594795<br>9 | 96347<br>959 | 96147<br>959 | 2.23E-<br>10 | ENSG000000<br>04864,<br>ENSG000001<br>97851,<br>ENSG000001<br>27922 | SLC25<br>A13,<br><b>C7orf<br/>76,</b><br>SHFM<br>1 | ENSG00000197851:                                                                                                                                        | ENSG00000004864: Height, Pork<br>consumption, Oily fish consumption;<br>ENSG00000197851: ; ENSG00000127922:<br>Bone mineral density (hip), Bone mineral<br>density (spine), Femoral neck bone mineral<br>density, Total body bone mineral density,<br>Heel bone mineral density, Total body<br>bone mineral density (age 45-60), Total<br>body bone mineral density (age over 60),<br>Serum platinum levels after completion of<br>cisplatin chemotherapy, Bone mineral<br>density, Nicotine glucouronidation, Chin<br>dimples, Lumbar spine bone mineral<br>density, Bone ultrasound measurement<br>(velocity of sound), Fractures, Cortical<br>surface area, Facial morphology traits (63<br>three-dimensional facial segments) |
| 1<br>5 | 9338509<br>6 | 93786<br>062 | 93586<br>062 | 3.83E-<br>10 | ENSG000001<br>73575,<br>ENSG000001<br>82175                         | CHD2,<br>RGMA                                      | ENSG00000182175: HDL<br>cholesterol levels x short<br>total sleep time interaction<br>(2df test), Blood protein<br>levels, Heel bone mineral<br>density | ENSG00000173575: IgG glycosylation,<br>Schizophrenia, General cognitive ability,<br>Pulse pressure, Mean corpuscular volume,<br>Cognitive performance (MTAG), Self-<br>reported math ability, Self-reported math<br>ability (MTAG), Educational attainment<br>(years of education), Educational<br>attainment (MTAG), Highest math class<br>taken, Highest math class taken (MTAG),<br>Mean corpuscular hemoglobin, Menarche<br>(age at onset); ENSG00000182175: HDL<br>cholesterol levels x short total sleep time                                                                                                                                                                                                               |

|        |               |               |               |              |                                             |                          |                                                                                                                                                                                                                                                                                                                                                                                                                                                                                                                                                                                                                                                                                                                                                                                                                  |                                                                                                                                                                                                                                                                                                                                                                                                                                                                                                                                                                                                                                                                                                                                                                                                                                           |
|--------|---------------|---------------|---------------|--------------|---------------------------------------------|--------------------------|------------------------------------------------------------------------------------------------------------------------------------------------------------------------------------------------------------------------------------------------------------------------------------------------------------------------------------------------------------------------------------------------------------------------------------------------------------------------------------------------------------------------------------------------------------------------------------------------------------------------------------------------------------------------------------------------------------------------------------------------------------------------------------------------------------------|-------------------------------------------------------------------------------------------------------------------------------------------------------------------------------------------------------------------------------------------------------------------------------------------------------------------------------------------------------------------------------------------------------------------------------------------------------------------------------------------------------------------------------------------------------------------------------------------------------------------------------------------------------------------------------------------------------------------------------------------------------------------------------------------------------------------------------------------|
|        |               |               |               |              |                                             |                          |                                                                                                                                                                                                                                                                                                                                                                                                                                                                                                                                                                                                                                                                                                                                                                                                                  | interaction (2df test), Blood protein levels, Heel bone mineral density                                                                                                                                                                                                                                                                                                                                                                                                                                                                                                                                                                                                                                                                                                                                                                   |
| 1<br>3 | 8817053<br>2  | 88668<br>426  | 88411<br>593  | 4.40E-<br>10 | ENSG000001<br>65300                         | SLITRK<br>5              | ENSG00000165300:                                                                                                                                                                                                                                                                                                                                                                                                                                                                                                                                                                                                                                                                                                                                                                                                 | ENSG00000165300:                                                                                                                                                                                                                                                                                                                                                                                                                                                                                                                                                                                                                                                                                                                                                                                                                          |
| 5      | 3172542<br>8  | 32125<br>428  | 31925<br>428  | 4.77E-<br>10 | ENSG000001<br>33401,<br>ENSG000001<br>13384 | PDZD<br>2,<br>GOLP<br>H3 | ENSG00000133401: Obesity-related traits, Myocardial infarction, Height, Chronic obstructive pulmonary disease, Vertical cup-disc ratio (adjusted for vertical disc diameter), Vertical cup-disc ratio (multi-trait analysis), Eotaxin levels, Renal cell carcinoma, Bipolar disorder (body mass index interaction), Response to serotonin reuptake inhibitors in major depressive disorder (plasma drug and metabolite levels), Optic disc size, Vertical cup-disc ratio, Adolescent idiopathic scoliosis, Interleukin-7 levels, Colorectal cancer, Metabolite levels, Corpus callosum central volume, Working memory, Breast cancer specific mortality in estrogen receptor positive breast cancer, Self-reported childhood asthma in adult smokers, Heart rate in heart failure with reduced ejection fraction | ENSG00000133401: Obesity-related traits, Myocardial infarction, Height, Chronic obstructive pulmonary disease, Vertical cup-disc ratio (adjusted for vertical disc diameter), Vertical cup-disc ratio (multi-trait analysis), Eotaxin levels, Renal cell carcinoma, Bipolar disorder (body mass index interaction), Response to serotonin reuptake inhibitors in major depressive disorder (plasma drug and metabolite levels), Optic disc size, Vertical cup-disc ratio, Adolescent idiopathic scoliosis, Interleukin-7 levels, Colorectal cancer, Metabolite levels, Corpus callosum central volume, Working memory, Breast cancer specific mortality in estrogen receptor positive breast cancer, Self-reported childhood asthma in adult smokers, Heart rate in heart failure with reduced ejection fraction; ENSG00000113384: Height |
| 2      | 2114982<br>06 | 21206<br>1871 | 21186<br>1871 | 5.45E-<br>10 | ENSG000000<br>21826                         | CPS1                     | ENSG00000021826: Chronic kidney disease, Fibrinogen, Body mass index in asthmatics, Homocysteine levels, Metabolite levels, Glomerular filtration rate                                                                                                                                                                                                                                                                                                                                                                                                                                                                                                                                                                                                                                                           | ENSG00000021826: Chronic kidney disease, Fibrinogen, Body mass index in asthmatics, Homocysteine levels, Metabolite levels, Glomerular filtration rate (creatinine), Betaine levels in individuals undergoing cardiac evaluation,                                                                                                                                                                                                                                                                                                                                                                                                                                                                                                                                                                                                         |

|  |  |  |  |  |  |                                                                                                                                                                                                                                                                                                                                                                                                                                                                                                                                                                                                                                                                                                                                                                                                                                                                                                                                                                                                                                                                                                     |                                                                                                                                                                                                                                                                                                                                                                                                                                                                                                                                                                                                                                                                                                                                                                                                                                                                                                                                                                                                                                                                                                                                                                                                                                                                                                                                                                                                                                                                                                                                                                                                                                                                                                 |
|--|--|--|--|--|--|-----------------------------------------------------------------------------------------------------------------------------------------------------------------------------------------------------------------------------------------------------------------------------------------------------------------------------------------------------------------------------------------------------------------------------------------------------------------------------------------------------------------------------------------------------------------------------------------------------------------------------------------------------------------------------------------------------------------------------------------------------------------------------------------------------------------------------------------------------------------------------------------------------------------------------------------------------------------------------------------------------------------------------------------------------------------------------------------------------|-------------------------------------------------------------------------------------------------------------------------------------------------------------------------------------------------------------------------------------------------------------------------------------------------------------------------------------------------------------------------------------------------------------------------------------------------------------------------------------------------------------------------------------------------------------------------------------------------------------------------------------------------------------------------------------------------------------------------------------------------------------------------------------------------------------------------------------------------------------------------------------------------------------------------------------------------------------------------------------------------------------------------------------------------------------------------------------------------------------------------------------------------------------------------------------------------------------------------------------------------------------------------------------------------------------------------------------------------------------------------------------------------------------------------------------------------------------------------------------------------------------------------------------------------------------------------------------------------------------------------------------------------------------------------------------------------|
|  |  |  |  |  |  | <p>(creatinine), Betaine levels in individuals undergoing cardiac evaluation, Glomerular filtration rate in non diabetics (creatinine), Body mass index, Eosinophil percentage of white cells, Mean corpuscular volume, Platelet count, Macular telangiectasia type 2, Metabolite levels (small molecules and protein measures), Plateletcrit, Amino acid levels, Fibrinogen levels, Mean corpuscular hemoglobin, Creatinine levels, Alanine transaminase levels, Serum metabolite concentrations in chronic kidney disease, Urinary metabolite levels in chronic kidney disease, Urinary metabolite modules (eigenmetabolites) in chronic kidney disease, Fat-free mass, HDL cholesterol levels, Appendicular lean mass, Apolipoprotein A1 levels, HDL cholesterol, Plasma homocysteine levels (post-methionine load test), Blood metabolite levels, Serum metabolite levels, Plasma free amino acid levels (adjusted for twenty other PFAAs), Serum 25-Hydroxyvitamin D levels, Eosinophil counts, HDL cholesterol levels x alcohol consumption (regular vs non-regular drinkers) interaction</p> | <p>Glomerular filtration rate in non diabetics (creatinine), Body mass index, Eosinophil percentage of white cells, Mean corpuscular volume, Platelet count, Macular telangiectasia type 2, Metabolite levels (small molecules and protein measures), Plateletcrit, Amino acid levels, Fibrinogen levels, Mean corpuscular hemoglobin, Creatinine levels, Alanine transaminase levels, Serum metabolite concentrations in chronic kidney disease, Urinary metabolite levels in chronic kidney disease, Urinary metabolite modules (eigenmetabolites) in chronic kidney disease, Fat-free mass, HDL cholesterol levels, Appendicular lean mass, Apolipoprotein A1 levels, HDL cholesterol, Plasma homocysteine levels (post-methionine load test), Blood metabolite levels, Serum metabolite levels, Plasma free amino acid levels (adjusted for twenty other PFAAs), Serum 25-Hydroxyvitamin D levels, Eosinophil counts, HDL cholesterol levels x alcohol consumption (regular vs non-regular drinkers) interaction (2df), Eosinophil percentage of granulocytes, Mean platelet volume, Urinary metabolites, Glomerular filtration rate, Estimated glomerular filtration rate, Blood urea nitrogen levels, Estimated glomerular filtration rate in diabetes, Estimated glomerular filtration rate in non-diabetics, HDL cholesterol levels in current drinkers, HDL cholesterol levels x alcohol consumption (drinkers vs non-drinkers) interaction (2df), Blood protein levels, Urinary albumin-to-creatinine ratio, Red blood cell count, Red cell distribution width, White blood cell count, Neutrophil count, Urinary albumin excretion (no hypertensive medication), Urinary albumin</p> |
|--|--|--|--|--|--|-----------------------------------------------------------------------------------------------------------------------------------------------------------------------------------------------------------------------------------------------------------------------------------------------------------------------------------------------------------------------------------------------------------------------------------------------------------------------------------------------------------------------------------------------------------------------------------------------------------------------------------------------------------------------------------------------------------------------------------------------------------------------------------------------------------------------------------------------------------------------------------------------------------------------------------------------------------------------------------------------------------------------------------------------------------------------------------------------------|-------------------------------------------------------------------------------------------------------------------------------------------------------------------------------------------------------------------------------------------------------------------------------------------------------------------------------------------------------------------------------------------------------------------------------------------------------------------------------------------------------------------------------------------------------------------------------------------------------------------------------------------------------------------------------------------------------------------------------------------------------------------------------------------------------------------------------------------------------------------------------------------------------------------------------------------------------------------------------------------------------------------------------------------------------------------------------------------------------------------------------------------------------------------------------------------------------------------------------------------------------------------------------------------------------------------------------------------------------------------------------------------------------------------------------------------------------------------------------------------------------------------------------------------------------------------------------------------------------------------------------------------------------------------------------------------------|



|        |               |               |               |              |                                                                                              |                                                        |                                                                                                                                                                                                                                                                                                                                                                                                                                                                                                                                                                                                                                                                                                                                                                                                                                                                       |                                                                                                                                                                                                                                                                                                        |
|--------|---------------|---------------|---------------|--------------|----------------------------------------------------------------------------------------------|--------------------------------------------------------|-----------------------------------------------------------------------------------------------------------------------------------------------------------------------------------------------------------------------------------------------------------------------------------------------------------------------------------------------------------------------------------------------------------------------------------------------------------------------------------------------------------------------------------------------------------------------------------------------------------------------------------------------------------------------------------------------------------------------------------------------------------------------------------------------------------------------------------------------------------------------|--------------------------------------------------------------------------------------------------------------------------------------------------------------------------------------------------------------------------------------------------------------------------------------------------------|
|        |               |               |               |              |                                                                                              |                                                        | (2df), Eosinophil percentage of granulocytes, Mean platelet volume, Urinary metabolites, Glomerular filtration rate, Estimated glomerular filtration rate, Blood urea nitrogen levels, Estimated glomerular filtration rate in diabetes, Estimated glomerular filtration rate in non-diabetics, HDL cholesterol levels in current drinkers, HDL cholesterol levels x alcohol consumption (drinkers vs non-drinkers) interaction (2df), Blood protein levels, Urinary albumin-to-creatinine ratio, Red blood cell count, Red cell distribution width, White blood cell count, Neutrophil count, Urinary albumin excretion (no hypertensive medication), Urinary albumin excretion, Glycine levels, Lymphocyte counts, Systolic blood pressure, Urinary potassium to creatinine ratio, Urinary sodium to creatinine ratio, Serum uric acid levels, Urate levels, Height | excretion, Glycine levels, Lymphocyte counts, Systolic blood pressure, Urinary potassium to creatinine ratio, Urinary sodium to creatinine ratio, Serum uric acid levels, Urate levels, Height                                                                                                         |
| 1<br>2 | 1335668<br>01 | 13396<br>6801 | 13376<br>6801 | 6.71E-<br>10 | ENSG000001<br>98393,<br>ENSG000001<br>98040,<br>ENSG000001<br>96387,<br>ENSG000002<br>14029, | ZNF26<br>,<br>ZNF84<br>,<br>ZNF14<br>0,<br>ZNF89<br>1, | ENSG00000090612: Waist-hip ratio, Waist-to-hip ratio adjusted for BMI, Type 2 diabetes, Cardiovascular disease                                                                                                                                                                                                                                                                                                                                                                                                                                                                                                                                                                                                                                                                                                                                                        | ENSG00000198393: ; ENSG00000198040: Heparin-induced thrombocytopenia; ENSG00000196387: ; ENSG00000214029: Refractive error, Waist-to-hip ratio adjusted for BMI, Intraocular pressure; ENSG00000256223: Type 2 diabetes; ENSG00000090612: Waist-hip ratio, Waist-to-hip ratio adjusted for BMI, Type 2 |

|   |           |           |           |          |                                                         |                                       |                                                                                                                                                                                                                                                                                                                                                                                                                                                                           |                                                                                                                                                                                                                                                                                                                                                                                                                                                                                                                                                                                                                                                                                                                                                            |
|---|-----------|-----------|-----------|----------|---------------------------------------------------------|---------------------------------------|---------------------------------------------------------------------------------------------------------------------------------------------------------------------------------------------------------------------------------------------------------------------------------------------------------------------------------------------------------------------------------------------------------------------------------------------------------------------------|------------------------------------------------------------------------------------------------------------------------------------------------------------------------------------------------------------------------------------------------------------------------------------------------------------------------------------------------------------------------------------------------------------------------------------------------------------------------------------------------------------------------------------------------------------------------------------------------------------------------------------------------------------------------------------------------------------------------------------------------------------|
|   |           |           |           |          | ENSG00000256223,<br>ENSG00000090612,<br>ENSG00000227059 | ZNF10<br>,<br><b>ZNF268</b> ,<br>ANHX |                                                                                                                                                                                                                                                                                                                                                                                                                                                                           | diabetes, Cardiovascular disease;<br>ENSG00000227059:                                                                                                                                                                                                                                                                                                                                                                                                                                                                                                                                                                                                                                                                                                      |
| 9 | 113454364 | 113913765 | 113713765 | 7.08E-10 | ENSG00000030304,<br>ENSG00000198121                     | MUSK<br>,<br><b>LPAR1</b>             | ENSG00000198121: Corneal structure, Post bronchodilator FEV1 in COPD, Eosinophil percentage of white cells, Eosinophil counts, Eosinophil percentage of granulocytes, Metabolite levels, Central corneal thickness, Neutrophil percentage of granulocytes, Sum eosinophil basophil counts, Pursuit maintenance gain, Height, Colorectal cancer or advanced adenoma                                                                                                        | ENSG0000030304: Heel bone mineral density, Body mass index, Plasma factor V levels in venous thrombosis (conditioned on rs6027), Maximum stenosis, Mean degree of stenosis, Height;<br>ENSG00000198121: Corneal structure, Post bronchodilator FEV1 in COPD, Eosinophil percentage of white cells, Eosinophil counts, Eosinophil percentage of granulocytes, Metabolite levels, Central corneal thickness, Neutrophil percentage of granulocytes, Sum eosinophil basophil counts, Pursuit maintenance gain, Height, Colorectal cancer or advanced adenoma                                                                                                                                                                                                  |
| 4 | 38047254  | 38736155  | 38260451  | 1.39E-09 | ENSG00000065882,<br>ENSG00000109787                     | TBC1D1,<br>KLF3                       | ENSG00000065882: Amyotrophic lateral sclerosis in C9orf72 mutation negative individuals, Periodontal microbiota, Facial morphology (factor 21, depth of nasal alae), Neutrophil percentage of white cells, Lymphocyte percentage of white cells, Metabolite levels, Verbal declarative memory, Reaction time, Lymphocyte counts, Weight, Response to SSRI (symptom remission), Response to antidepressants (symptom remission), White blood cell count, Eosinophil counts | ENSG00000065882: Amyotrophic lateral sclerosis in C9orf72 mutation negative individuals, Periodontal microbiota, Facial morphology (factor 21, depth of nasal alae), Neutrophil percentage of white cells, Lymphocyte percentage of white cells, Metabolite levels, Verbal declarative memory, Reaction time, Lymphocyte counts, Weight, Response to SSRI (symptom remission), Response to antidepressants (symptom remission), White blood cell count, Eosinophil counts;<br>ENSG00000109787: Eosinophil percentage of white cells, Eosinophil counts, White blood cell count, Sum eosinophil basophil counts, Eosinophil percentage of granulocytes, Neutrophil percentage of granulocytes, Lymphocyte counts, Body mass index, Hand grip strength, Mean |

|    |           |           |           |          |                                                                                                                                                          |                                                                       |                                                                                                                                                                                                                                                                                                                                                                                                                                                                                                                                               |                                                                                                                                                                                                                                                                                                                                                                                                                                                                                                                                                                                                                                                                                  |
|----|-----------|-----------|-----------|----------|----------------------------------------------------------------------------------------------------------------------------------------------------------|-----------------------------------------------------------------------|-----------------------------------------------------------------------------------------------------------------------------------------------------------------------------------------------------------------------------------------------------------------------------------------------------------------------------------------------------------------------------------------------------------------------------------------------------------------------------------------------------------------------------------------------|----------------------------------------------------------------------------------------------------------------------------------------------------------------------------------------------------------------------------------------------------------------------------------------------------------------------------------------------------------------------------------------------------------------------------------------------------------------------------------------------------------------------------------------------------------------------------------------------------------------------------------------------------------------------------------|
|    |           |           |           |          |                                                                                                                                                          |                                                                       |                                                                                                                                                                                                                                                                                                                                                                                                                                                                                                                                               | platelet volume, Mean corpuscular hemoglobin, Red cell distribution width                                                                                                                                                                                                                                                                                                                                                                                                                                                                                                                                                                                                        |
| 6  | 170396266 | 170796266 | 170596266 | 1.54E-09 | ENSG00000198719, ENSG00000112584                                                                                                                         | DLL1, FAM120B                                                         | ENSG00000198719: General risk tolerance (MTAG)                                                                                                                                                                                                                                                                                                                                                                                                                                                                                                | ENSG00000198719: General risk tolerance (MTAG); ENSG00000112584: General risk tolerance (MTAG), Idiopathic dilated cardiomyopathy, Paracentral lobule volume, Menarche (age at onset)                                                                                                                                                                                                                                                                                                                                                                                                                                                                                            |
| 10 | 94978044  | 95389525  | 95189525  | 1.57E-09 | ENSG00000138119, ENSG00000138180, ENSG00000186188, ENSG00000138207, ENSG00000095464                                                                      | MYOF, CEP55, FFAR4, RBP4, PDE6C                                       | ENSG00000138119: Gut microbiome composition (summer), Facial morphology (factor 17, height of vermilion upper lip), Cerebrospinal fluid immune biomarker levels; ENSG00000138180: Lobe attachment (rater-scored or self-reported), Height; ENSG00000186188: Retinol levels, Optic disc area, Waist-to-hip ratio adjusted for BMI, Blood protein levels, Waist-hip ratio, White blood cell count; ENSG00000138207: Optic disc area, Blood protein levels; ENSG00000095464: Preschool internalizing problems, Urinary tract infection frequency |                                                                                                                                                                                                                                                                                                                                                                                                                                                                                                                                                                                                                                                                                  |
| 1  | 168973787 | 169701700 | 169450264 | 1.71E-09 | ENSG00000143153, ENSG00000143156, ENSG00000117475, ENSG00000117477, ENSG00000117479, ENSG00000198734, ENSG00000174175, ENSG00000000460, ENSG00000188404, | ATP1B1, NME7, BLZF1, CCDC181, SLC19A2, F5, SELP, C1orf112, SELL, SELE | ENSG00000117479: QT interval                                                                                                                                                                                                                                                                                                                                                                                                                                                                                                                  | ENSG00000143153: QT interval, Coronary artery disease, Venous thromboembolism, Pulse pressure, Electrocardiographic traits, Systolic blood pressure; ENSG00000143156: Venous thromboembolism, D-dimer levels, Coronary artery disease, QT interval, Pulse pressure, Systolic blood pressure, Mumps, QT dynamics during exercise; ENSG00000117475: Blood protein levels; ENSG00000117477: ; ENSG00000117479: QT interval; ENSG00000198734: Hippocampal atrophy, Activated partial thromboplastin time, Venous thromboembolism, Hemostatic factors and hematological phenotypes, Uric acid levels, Inflammatory bowel disease, Thrombosis, Ischemic stroke, Optic disc area, Blood |

|  |  |  |  |  |                |  |  |                                                                                                                                                                                                                                                                                                                                                                                                                                                                                                                                                                                                                                                                                                                                                                                                                                                                                                                                    |
|--|--|--|--|--|----------------|--|--|------------------------------------------------------------------------------------------------------------------------------------------------------------------------------------------------------------------------------------------------------------------------------------------------------------------------------------------------------------------------------------------------------------------------------------------------------------------------------------------------------------------------------------------------------------------------------------------------------------------------------------------------------------------------------------------------------------------------------------------------------------------------------------------------------------------------------------------------------------------------------------------------------------------------------------|
|  |  |  |  |  | ENSG0000007908 |  |  | protein levels, Prothrombin time, Vertical cup-disc ratio (multi-trait analysis), Cytokine network levels (multivariate analysis), CTACK levels, Optic disc size, Vertical cup-disc ratio, Peripheral artery disease, Stem cell factor levels, Medication use (antithrombotic agents);<br>ENSG00000174175: Soluble levels of adhesion molecules, Activated partial thromboplastin time, Blood protein levels, Optic disc size, Late-onset Alzheimer's disease; ENSG00000000460: Venous thromboembolism, Acne (severe), Blood protein levels, Intrinsic epigenetic age acceleration, Amyotrophic lateral sclerosis, Tonsillectomy, White blood cell count, Monocyte count, Cardiac Troponin-T levels, Age at menopause, Eosinophil counts; ENSG00000188404: Blood protein levels, Amyotrophic lateral sclerosis, Monocyte count, Eosinophil counts; ENSG00000007908: White blood cell count, Blood protein levels, Age at menopause |
|--|--|--|--|--|----------------|--|--|------------------------------------------------------------------------------------------------------------------------------------------------------------------------------------------------------------------------------------------------------------------------------------------------------------------------------------------------------------------------------------------------------------------------------------------------------------------------------------------------------------------------------------------------------------------------------------------------------------------------------------------------------------------------------------------------------------------------------------------------------------------------------------------------------------------------------------------------------------------------------------------------------------------------------------|

4599  
4600  
4601  
4602  
4603

Table S4d.1 Eurasia k3

| chr | start     | end       | bestpos   | Min(P)   | ensembl                                                                     | hgnc                                             | disease_trait_best                                                                                                                                          | disease_trait                                                                                                                                                                                                                                                                                                                                                                                                                                                                                                                    |
|-----|-----------|-----------|-----------|----------|-----------------------------------------------------------------------------|--------------------------------------------------|-------------------------------------------------------------------------------------------------------------------------------------------------------------|----------------------------------------------------------------------------------------------------------------------------------------------------------------------------------------------------------------------------------------------------------------------------------------------------------------------------------------------------------------------------------------------------------------------------------------------------------------------------------------------------------------------------------|
| 6   | 134192815 | 134628278 | 134392815 | 8.49E-16 | ENSG00000118526,<br>ENSG00000028839,<br>ENSG00000146411,<br>ENSG00000118515 | TCF21,<br>TBPL1,<br><b>SLC2A12</b><br><br>, SGK1 | ENSG00000146411: Coronary artery disease, High chromosomal aberration frequency (chromosome type), FEV1, Lung function (FVC). Mean corpuscular haemoglobin. | ENSG00000118526: Coronary heart disease, Coronary artery disease or ischemic stroke, Coronary artery disease, Coronary artery disease or large artery stroke, PR interval, Medication use (diuretics), Lung function (FEV1/FVC); ENSG00000028839: Mean corpuscular hemoglobin; ENSG00000146411: Coronary artery disease, High chromosomal aberration frequency (chromosome type), FEV1, Lung function (FVC); ENSG00000118515: Immune response to smallpox (secreted IFN-alpha), Alzheimer disease and age of onset, Pelvic organ |

|    |           |           |           |          |                                                                                                                                                                                                                             |                                                                                                |                                                                                                                                                                                                                                                                                                                                                                                                                                                                                                                   |                                                                                                                                                                                                                                                                                                                                                                                                                                                                                                                                                                                                                                                                                                                                                                                                                                                                                                                                                                                                                                                                                                                                                                                                                                                                                                                                                                                                                                                                                             |
|----|-----------|-----------|-----------|----------|-----------------------------------------------------------------------------------------------------------------------------------------------------------------------------------------------------------------------------|------------------------------------------------------------------------------------------------|-------------------------------------------------------------------------------------------------------------------------------------------------------------------------------------------------------------------------------------------------------------------------------------------------------------------------------------------------------------------------------------------------------------------------------------------------------------------------------------------------------------------|---------------------------------------------------------------------------------------------------------------------------------------------------------------------------------------------------------------------------------------------------------------------------------------------------------------------------------------------------------------------------------------------------------------------------------------------------------------------------------------------------------------------------------------------------------------------------------------------------------------------------------------------------------------------------------------------------------------------------------------------------------------------------------------------------------------------------------------------------------------------------------------------------------------------------------------------------------------------------------------------------------------------------------------------------------------------------------------------------------------------------------------------------------------------------------------------------------------------------------------------------------------------------------------------------------------------------------------------------------------------------------------------------------------------------------------------------------------------------------------------|
|    |           |           |           |          |                                                                                                                                                                                                                             |                                                                                                |                                                                                                                                                                                                                                                                                                                                                                                                                                                                                                                   | prolapse, Pelvic organ prolapse (moderate/severe), Blond vs. brown/black hair color, Schizophrenia (inflammation and infection response interaction), Body mass index (smoking years interaction), Metabolite levels, Adolescent idiopathic scoliosis, Hair color                                                                                                                                                                                                                                                                                                                                                                                                                                                                                                                                                                                                                                                                                                                                                                                                                                                                                                                                                                                                                                                                                                                                                                                                                           |
| 15 | 48226484  | 48633494  | 48433494  | 2.09E-15 | ENSG00000188467, ENSG00000104177, ENSG00000233932, ENSG00000074803, ENSG00000128951                                                                                                                                         | SLC24A5, MYEF2, CTXN2, SLC12A1, DUT                                                            | ENSG00000188467: Hair color, Skin pigmentation, Body mass index, Skin, hair and eye pigmentation (multivariate analysis), Eye color, Eye color (brightness), Eye color (saturation), Iris color (a* coordinate), Skin reflectance (Melanin index), Iris color (b* coordinate); ENSG00000104177: Skin pigmentation, Hair color; ENSG00000233932: ; ENSG00000074803: Systemic lupus erythematosus, Longevity, Skin reflectance (Melanin index), Lymphocyte counts; ENSG00000128951: Protein quantitative trait loci | ENSG00000188467: Hair color, Skin pigmentation, Body mass index, Skin, hair and eye pigmentation (multivariate analysis), Eye color, Eye color (brightness), Eye color (saturation), Iris color (a* coordinate), Skin reflectance (Melanin index), Iris color (b* coordinate); ENSG00000104177: Skin pigmentation, Hair color; ENSG00000233932: ; ENSG00000074803: Systemic lupus erythematosus, Longevity, Skin reflectance (Melanin index), Lymphocyte counts; ENSG00000128951: Protein quantitative trait loci                                                                                                                                                                                                                                                                                                                                                                                                                                                                                                                                                                                                                                                                                                                                                                                                                                                                                                                                                                           |
| 2  | 135084038 | 137229668 | 135479980 | 5.49E-11 | ENSG00000152127, ENSG00000152128, ENSG00000153086, ENSG00000082258, ENSG00000176601, ENSG00000115839, ENSG00000121988, ENSG00000048991, ENSG00000144224, ENSG00000115850, ENSG00000076003, ENSG00000115866, ENSG00000121966 | MGAT5, TMEM163, ACMSD, CCNT2, MAP3K19, RAB3GAP1, ZRANB3, R3HDM1, UBXN4, LCT, MCM6, DARS, CXCR4 | ENSG00000152128: Large artery stroke, Neuroticism, Parkinson's disease or first degree relation to individual with Parkinson's disease, HDL cholesterol levels, Cutaneous melanoma or hair colour, Asthma x air pollution interaction (2df), Hematocrit, Blond vs. brown/black hair color, Spatial memory, Hemoglobin concentration, Low density lipoprotein cholesterol levels, Self-reported math ability, Self-reported math ability (MTAG), Red blood cell count, Hair color                                  | ENSG00000152127: Multiple sclerosis (severity), Subcutaneous adipose tissue, Post bronchodilator FEV1/FVC ratio, Serum alkaline phosphatase levels, N-glycan levels, Blood protein levels, Chronic lymphocytic leukemia or systemic lupus erythematosus, Marginal zone lymphoma or systemic lupus erythematosus, Systemic lupus erythematosus, Eosinophil counts; ENSG00000152128: Large artery stroke, Neuroticism, Parkinson's disease or first degree relation to individual with Parkinson's disease, HDL cholesterol levels, Cutaneous melanoma or hair colour, Asthma x air pollution interaction (2df), Hematocrit, Blond vs. brown/black hair color, Spatial memory, Hemoglobin concentration, Low density lipoprotein cholesterol levels, Self-reported math ability, Self-reported math ability (MTAG), Red blood cell count, Hair color; ENSG00000153086: Obesity-related traits, LDL cholesterol levels, Apolipoprotein B levels, Diisocyanate-induced asthma, Blood metabolite levels, Hematocrit, Free thyroxine concentration, Red blood cell count, Hand grip strength, Diastolic blood pressure; ENSG00000082258: Age at menopause; ENSG00000176601: Colonoscopy-negative controls vs population controls, Corneal structure, Hematocrit, Hemoglobin concentration, Mean corpuscular hemoglobin; ENSG00000115839: Cholesterol, total, Body mass index, Blood metabolite levels, HDL cholesterol levels x alcohol consumption (regular vs non-regular drinkers) interaction |

|   |          |          |          |          |                                                                                     |                                                  |                                                                                                                                                                                                                                                                                                                                                                                                               |                                                                                                                                                                                                                                                                                                                                                                                                                                                                                                                                                                                                                                                                                                                                                                                                                                                                                                                                                                                                                                                                                                                                                                                                                                                                                                                                                                                                                                                                                                                                                                                                               |
|---|----------|----------|----------|----------|-------------------------------------------------------------------------------------|--------------------------------------------------|---------------------------------------------------------------------------------------------------------------------------------------------------------------------------------------------------------------------------------------------------------------------------------------------------------------------------------------------------------------------------------------------------------------|---------------------------------------------------------------------------------------------------------------------------------------------------------------------------------------------------------------------------------------------------------------------------------------------------------------------------------------------------------------------------------------------------------------------------------------------------------------------------------------------------------------------------------------------------------------------------------------------------------------------------------------------------------------------------------------------------------------------------------------------------------------------------------------------------------------------------------------------------------------------------------------------------------------------------------------------------------------------------------------------------------------------------------------------------------------------------------------------------------------------------------------------------------------------------------------------------------------------------------------------------------------------------------------------------------------------------------------------------------------------------------------------------------------------------------------------------------------------------------------------------------------------------------------------------------------------------------------------------------------|
|   |          |          |          |          |                                                                                     |                                                  |                                                                                                                                                                                                                                                                                                                                                                                                               | (2df), LDL cholesterol levels in current drinkers, LDL cholesterol levels x alcohol consumption (drinkers vs non-drinkers) interaction (2df), LDL cholesterol levels x alcohol consumption (regular vs non-regular drinkers) interaction (2df), LDL cholesterol levels, Gut microbiota (bacterial taxa, rank normal transformation method), Sudden cardiac arrest in coronary artery disease; ENSG00000121988: Mosquito bite size, Low density lipoprotein cholesterol levels, Hip circumference, Waist circumference adjusted for body mass index, Sudden cardiac arrest in coronary artery disease, Type 2 diabetes, Height; ENSG00000048991: Mosquito bite size, Blood protein levels, Urinary metabolite levels in chronic kidney disease, Height, LDL cholesterol levels x short total sleep time interaction (2df test), HDL cholesterol levels, Apolipoprotein A1 levels, Red cell distribution width, Hand grip strength; ENSG00000144224: Cholesterol, total, Corneal structure; ENSG00000115850: White blood cell count, Blood protein levels, Osteoarthritis (self-reported); ENSG00000076003: Body mass index, Total cholesterol change in response to fenofibrate in statin-treated type 2 diabetes, Blood protein levels, Hip circumference, 1,5-anhydroglucitol levels, Gut microbiota (bacterial taxa, rank normal transformation method); ENSG00000115866: Mosquito bite size, White blood cell count, Neutrophil count, Monocyte count, Total cholesterol change in response to fenofibrate in statin-treated type 2 diabetes, Systemic lupus erythematosus; ENSG00000121966: Tonsillectomy |
| 5 | 33699690 | 34164938 | 33958959 | 2.30E-10 | ENSG00000151388, ENSG00000182631, ENSG00000164175, ENSG00000242110, ENSG00000082196 | ADAMTS12, RXFP3, <b>SLC45A2</b> , AMACR, C1QTNF3 | ENSG00000164175: Tanning, Skin pigmentation, Black vs. blond hair color, Black vs. red hair color, Melanoma, Hair color, Eye color, Squamous cell carcinoma, Skin colour saturation, Perceived skin darkness, Skin sensitivity to sun, Black vs. non-black hair color, Skin aging (microtopography measurement), Basal cell carcinoma, Cutaneous melanoma or hair colour, Cutaneous malignant melanoma, Nevus | ENSG00000151388: Stroke (pediatric), Mortality in heart failure, Aspartate aminotransferase levels in excessive alcohol consumption, Neurofibrillary tangles, Adolescent idiopathic scoliosis, Height, Hair color; ENSG00000182631: ; ENSG00000164175: Tanning, Skin pigmentation, Black vs. blond hair color, Black vs. red hair color, Melanoma, Hair color, Eye color, Squamous cell carcinoma, Skin colour saturation, Perceived skin darkness, Skin sensitivity to sun, Black vs. non-black hair color, Skin aging (microtopography measurement), Basal cell carcinoma, Cutaneous melanoma or hair colour, Cutaneous malignant melanoma, Nevus count or cutaneous melanoma, Rosacea symptom severity, Low tan response, Skin, hair and eye pigmentation (multivariate                                                                                                                                                                                                                                                                                                                                                                                                                                                                                                                                                                                                                                                                                                                                                                                                                                    |

|   |           |           |           |          |                                                                                                                                                                                                                                                               |                                                                                                                                           |                                                                                                                                                                                                                                                                                                                                                                                                       |                                                                                                                                                                                                                                                                                                                                                                                                                                                                                                                                                                                                                                                                                                                                                                                                                                                                                                                                                                                                                                                                                                                      |
|---|-----------|-----------|-----------|----------|---------------------------------------------------------------------------------------------------------------------------------------------------------------------------------------------------------------------------------------------------------------|-------------------------------------------------------------------------------------------------------------------------------------------|-------------------------------------------------------------------------------------------------------------------------------------------------------------------------------------------------------------------------------------------------------------------------------------------------------------------------------------------------------------------------------------------------------|----------------------------------------------------------------------------------------------------------------------------------------------------------------------------------------------------------------------------------------------------------------------------------------------------------------------------------------------------------------------------------------------------------------------------------------------------------------------------------------------------------------------------------------------------------------------------------------------------------------------------------------------------------------------------------------------------------------------------------------------------------------------------------------------------------------------------------------------------------------------------------------------------------------------------------------------------------------------------------------------------------------------------------------------------------------------------------------------------------------------|
|   |           |           |           |          |                                                                                                                                                                                                                                                               |                                                                                                                                           | count or cutaneous melanoma, Rosacea symptom severity, Low tan response, Skin, hair and eye pigmentation (multivariate analysis), Brown vs. black hair color, Blond vs. brown/black hair color, Cutaneous squamous cell carcinoma, Eye color (saturation), Eye color (brightness), Monobrow, Keratinocyte cancer (MTAG), Eye color traits, Skin pigmentation traits, Hair morphology traits, Sunburns | analysis), Brown vs. black hair color, Blond vs. brown/black hair color, Cutaneous squamous cell carcinoma, Eye color (saturation), Eye color (brightness), Monobrow, Keratinocyte cancer (MTAG), Eye color traits, Skin pigmentation traits, Hair morphology traits, Sunburns; ENSG00000242110: Blond vs. brown/black hair color, Longevity; ENSG0000082196: Waist-to-hip ratio adjusted for BMI, Waist-hip ratio                                                                                                                                                                                                                                                                                                                                                                                                                                                                                                                                                                                                                                                                                                   |
| 2 | 85369379  | 85885211  | 85592841  | 2.81E-10 | ENSG00000152284, ENSG00000152291, ENSG00000042445, ENSG00000115459, ENSG00000042493, ENSG00000152292, ENSG00000168906, ENSG00000115486, ENSG00000118640, ENSG00000168899, ENSG00000168894, ENSG00000168890, ENSG00000168883, ENSG00000168887, ENSG00000168878 | TCF7L1, TGOLN2, RETSAT, <b>ELMOD3</b> , CAPG, SH2D6, MAT2A, GG CX, <b>VAMP8</b> , <b>VAMP5</b> , RNF181, TMEM150A, USP39, C2orf68, SFTP B | ENSG00000115459: Blood protein levels.                                                                                                                                                                                                                                                                                                                                                                | ENSG00000152284: Total body bone mineral density, Pulse pressure, Heel bone mineral density, Cervical cancer, Red blood cell count, Lung function (FEV1/FVC), Systolic blood pressure; ENSG00000152291: Ear protrusion, White blood cell count; ENSG00000042445: ; ENSG00000115459: Blood protein levels; ENSG00000042493: ; ENSG00000152292: Mean platelet volume, Platelet count; ENSG00000168906: Basophil count, Coronary artery disease; ENSG00000115486: Coronary artery disease (myocardial infarction, percutaneous transluminal coronary angioplasty, coronary artery bypass grafting, angina or chronic ischemic heart disease), Triglyceride levels, Coronary artery disease, Eosinophil counts; <b>ENSG00000118640: Eosinophil counts, Prostate cancer, Fat-free mass, Sum eosinophil basophil counts, Coronary artery disease; ENSG00000168899: Parental longevity (father's age at death), Adolescent idiopathic scoliosis, Height;</b> ENSG00000168894: ; ENSG00000168890: White blood cell count; ENSG00000168883: Neurofibrillary tangles; ENSG00000168887: ; ENSG00000168878: Blood protein levels |
| 3 | 129487889 | 129894124 | 129694124 | 4.23E-10 | ENSG00000172765, ENSG00000170893                                                                                                                                                                                                                              | TMCC1, <b>TRH</b>                                                                                                                         | ENSG00000170893: waist-hip circumference, Sitting height, Chronic lower respiratory diseases, asthma. rs10934899                                                                                                                                                                                                                                                                                      | ENSG00000172765: Height, Type 2 diabetes, Waist-to-hip ratio adjusted for BMI; ENSG00000170893:                                                                                                                                                                                                                                                                                                                                                                                                                                                                                                                                                                                                                                                                                                                                                                                                                                                                                                                                                                                                                      |
| 4 | 38553198  | 38965720  | 38765720  | 2.95E-09 | ENSG00000109787, ENSG00000174123, ENSG00000174125,                                                                                                                                                                                                            | KLF3, <b>TLR10</b> , TLR1, TLR6, FAM114A1                                                                                                 | ENSG00000174123: Peripheral arterial disease (traffic-related air pollution interaction), Asthma or                                                                                                                                                                                                                                                                                                   | ENSG00000109787: Eosinophil percentage of white cells, Eosinophil counts, White blood cell count, Sum eosinophil basophil counts, Eosinophil percentage of granulocytes, Neutrophil percentage of granulocytes, Lymphocyte counts,                                                                                                                                                                                                                                                                                                                                                                                                                                                                                                                                                                                                                                                                                                                                                                                                                                                                                   |

|   |           |           |           |          |                                                                             |                                         |                                                                                                                                                                                                                                                                                                                                                                                                                                |                                                                                                                                                                                                                                                                                                                                                                                                                                                                                                                                                                                                                                                                                                                                                                                                                                                                                                                                                                                                                                                                                                                                                                                                                                           |
|---|-----------|-----------|-----------|----------|-----------------------------------------------------------------------------|-----------------------------------------|--------------------------------------------------------------------------------------------------------------------------------------------------------------------------------------------------------------------------------------------------------------------------------------------------------------------------------------------------------------------------------------------------------------------------------|-------------------------------------------------------------------------------------------------------------------------------------------------------------------------------------------------------------------------------------------------------------------------------------------------------------------------------------------------------------------------------------------------------------------------------------------------------------------------------------------------------------------------------------------------------------------------------------------------------------------------------------------------------------------------------------------------------------------------------------------------------------------------------------------------------------------------------------------------------------------------------------------------------------------------------------------------------------------------------------------------------------------------------------------------------------------------------------------------------------------------------------------------------------------------------------------------------------------------------------------|
|   |           |           |           |          | ENSG00000174130,<br>ENSG00000197712                                         |                                         | allergic disease (pleiotropy),<br>Adolescent idiopathic scoliosis                                                                                                                                                                                                                                                                                                                                                              | Body mass index, Hand grip strength, Mean platelet volume,<br>Mean corpuscular hemoglobin, Red cell distribution width;<br>ENSG00000174123: Peripheral arterial disease (traffic-related<br>air pollution interaction), Asthma or allergic disease<br>(pleiotropy), Adolescent idiopathic scoliosis;<br>ENSG00000174125: Coronary artery calcified atherosclerotic<br>plaque score in type 2 diabetes, Limited cutaneous systemic<br>scleroderma, Diabetes in response to antihypertensive drug<br>treatment (treatment strategy interaction), Asthma, Allergic<br>sensitization, Self-reported allergy, Asthma and hay fever,<br>Alcohol consumption, Asthma (childhood onset), Allergic<br>rhinitis, Hay fever and/or eczema, Allergy, Allergic disease<br>(asthma, hay fever or eczema), Breast cancer, Asthma onset<br>(childhood vs adult), Composite immunoglobulin trait<br>(IgG/IgM), DNA methylation variation (age effect), Asthma<br>(age of onset), Eczema, Respiratory diseases;<br>ENSG00000174130: Allergic disease (asthma, hay fever or<br>eczema); ENSG00000197712: Alcohol dependence, Moderate<br>or severe diarrhoea in darapladib-treated cardiovascular<br>disease (time to event), Red blood cell count           |
| 1 | 227020437 | 227877723 | 227407855 | 3.77E-09 | ENSG00000143801,<br>ENSG00000163050,<br>ENSG00000143776,<br>ENSG00000181450 | PSEN2,<br>ADCK3,<br>CDC42BPA,<br>ZNF678 | ENSG00000143776: Optic disc<br>area, Optic cup area, Blond vs.<br>brown/black hair color,<br>Metabolite levels, Diastolic blood<br>pressure, Myeloid white cell<br>count, Blood urea nitrogen levels,<br>White blood cell count,<br>Neutrophil count, Cardiovascular<br>death or myocardial infarction in<br>response to clopidogrel<br>treatment, Smoking initiation<br>(ever regular vs never regular)<br>(MTAG), Hair color | ENSG00000143801: Worry, Heel bone mineral density;<br>ENSG00000163050: Granulocyte percentage of myeloid white<br>cells, Cataracts (operation), Neutrophil count, Lymphocyte<br>percentage of white cells, Sum basophil neutrophil counts,<br>Waist-to-hip ratio adjusted for BMI, Worry, Sum neutrophil<br>eosinophil counts, Granulocyte count, Gut microbiota<br>(bacterial taxa, hurdle binary method), PR interval, Waist<br>circumference adjusted for body mass index, Estimated<br>glomerular filtration rate, Highest math class taken;<br>ENSG00000143776: Optic disc area, Optic cup area, Blond vs.<br>brown/black hair color, Metabolite levels, Diastolic blood<br>pressure, Myeloid white cell count, Blood urea nitrogen levels,<br>White blood cell count, Neutrophil count, Cardiovascular<br>death or myocardial infarction in response to clopidogrel<br>treatment, Smoking initiation (ever regular vs never regular)<br>(MTAG), Hair color; ENSG00000181450: Height, Hip<br>circumference adjusted for BMI, Body fat distribution (arm fat<br>ratio), Body fat distribution (leg fat ratio), Body fat distribution<br>(trunk fat ratio), Insular cortex volume, Waist circumference<br>adjusted for body mass index |



|    |          |          |          |          |                                                                    |                                          |                                                                                                                                                                                                                                                                                                                                                |                                                                                                                                                                                                                                                                                                                                                                                                                                                                                                                                                                                                                                                                                                                                                                                                                                                                                                                                                                                                                                                                                                                                                                                                                                                                                                                      |
|----|----------|----------|----------|----------|--------------------------------------------------------------------|------------------------------------------|------------------------------------------------------------------------------------------------------------------------------------------------------------------------------------------------------------------------------------------------------------------------------------------------------------------------------------------------|----------------------------------------------------------------------------------------------------------------------------------------------------------------------------------------------------------------------------------------------------------------------------------------------------------------------------------------------------------------------------------------------------------------------------------------------------------------------------------------------------------------------------------------------------------------------------------------------------------------------------------------------------------------------------------------------------------------------------------------------------------------------------------------------------------------------------------------------------------------------------------------------------------------------------------------------------------------------------------------------------------------------------------------------------------------------------------------------------------------------------------------------------------------------------------------------------------------------------------------------------------------------------------------------------------------------|
| 21 | 26691192 | 27196935 | 26935513 | 1.27E-08 | ENSG00000154719, ENSG00000154721, ENSG00000154723, ENSG00000154727 | <b>MRPL39, JAM2, ATP5J, GABPA</b>        | ENSG00000154719: pork intake, arthrosis, Comparative height size at 10, Abdominal hernia                                                                                                                                                                                                                                                       | ENSG00000154719 ; ENSG00000154721: Longitudinal change in brain amyloid TP burden, Age at loss of ambulation in Duchenne muscular dystrophy; ENSG00000154723: Alzheimer's disease in hypertension-negative individuals; ENSG00000154727: Gout (normal type), Nicotine dependence symptom count                                                                                                                                                                                                                                                                                                                                                                                                                                                                                                                                                                                                                                                                                                                                                                                                                                                                                                                                                                                                                       |
| 9  | 27009422 | 27434948 | 27209422 | 1.56E-08 | ENSG00000096872, ENSG00000120156, ENSG00000120160, ENSG00000120162 | IFT74, <b>TEK, EQTN, MOB3B</b>           | ENSG00000120156: Comparative height at 10. Sitting height. IgG glycosylation, Coronary artery disease, Blood protein levels, Blood protein levels in cardiovascular risk, G, Trans fatty acid levels, Endothelial growth factor levels, Cognitive decline (age-related), Clostridium difficile infection in multiple myeloma.                  | ENSG00000096872: Emphysema annual change measurement in smokers (adjusted lung density); ENSG00000120156: IgG glycosylation, Coronary artery disease, Blood protein levels, Blood protein levels in cardiovascular risk, Schizophrenia, Trans fatty acid levels, Endothelial growth factor levels, Cognitive decline (age-related), Clostridium difficile infection in multiple myeloma; ENSG00000120160: ; ENSG00000120162: Response to TNF antagonist treatment, Urinary symptoms in response to radiotherapy in prostate cancer, Amyotrophic lateral sclerosis, Plasma trimethylamine N-oxide levels, Breast cancer specific mortality in estrogen receptor negative breast cancer, Height, Hair color                                                                                                                                                                                                                                                                                                                                                                                                                                                                                                                                                                                                            |
| 15 | 38464638 | 38992430 | 38792430 | 1.65E-08 | ENSG00000166068, ENSG00000171262, ENSG00000172575, ENSG00000175779 | SPRED1, FAM98B, <b>RASGRP1, C15orf53</b> | ENSG00000172575: Type 1 diabetes, Crohn's disease, Rheumatoid arthritis (ACPA-positive), Rheumatoid arthritis, Multiple sclerosis, Type 2 diabetes, Carboplatin disposition in epithelial ovarian cancer, Autoimmune thyroid disease, Medication use (thyroid preparations), Autoimmune traits (pleiotropy), Autoimmune traits, Hypothyroidism | ENSG00000166068: Birth weight, HDL cholesterol levels x long total sleep time interaction (2df test), Adolescent idiopathic scoliosis, Cognitive performance (processing speed); ENSG00000171262: Systemic lupus erythematosus; ENSG00000172575: Type 1 diabetes, Crohn's disease, Rheumatoid arthritis (ACPA-positive), Rheumatoid arthritis, Multiple sclerosis, Type 2 diabetes, Carboplatin disposition in epithelial ovarian cancer, Autoimmune thyroid disease, Medication use (thyroid preparations), Autoimmune traits (pleiotropy), Autoimmune traits, Hypothyroidism; ENSG00000175779: Cardiac hypertrophy, Metabolic traits, Bipolar disorder or major depressive disorder, Bipolar disorder, Bipolar disorder and schizophrenia, Metabolite levels, Developmental language disorder, Platelet count, Plateletcrit, Parental extreme longevity (95 years and older), Triglyceride change in response to fenofibrate in statin-treated type 2 diabetes, Bipolar I disorder, Alcohol dependence (age at onset), Response to abacavir-containing treatment in HIV-1 infection (virologic failure), Brain region volumes, Bone mineral density, Age at loss of ambulation in Duchenne muscular dystrophy, Follicle stimulating hormone levels in polycystic ovary syndrome, Chronic kidney disease, Estimated |

|    |          |          |          |          |                                                                                                                                                                                                                                                                                                                                                                                                                                                            |                                                                                                                                                                                                                                                                                                                                                                                                                                                                                                                                                                                                                                                                                                                                                                                                                                                                                                                                                                              |                                                                                                                                                                                                                                                                                                                                                                                                                                                                                                                                                                                                                                                                                                                                                                                                                                                                                                                                                                                                                                                                                                                                                                                                                                                                                                                                                                                                                                                                                                                                                                                                                                                                                                                                                                                                                                                                |
|----|----------|----------|----------|----------|------------------------------------------------------------------------------------------------------------------------------------------------------------------------------------------------------------------------------------------------------------------------------------------------------------------------------------------------------------------------------------------------------------------------------------------------------------|------------------------------------------------------------------------------------------------------------------------------------------------------------------------------------------------------------------------------------------------------------------------------------------------------------------------------------------------------------------------------------------------------------------------------------------------------------------------------------------------------------------------------------------------------------------------------------------------------------------------------------------------------------------------------------------------------------------------------------------------------------------------------------------------------------------------------------------------------------------------------------------------------------------------------------------------------------------------------|----------------------------------------------------------------------------------------------------------------------------------------------------------------------------------------------------------------------------------------------------------------------------------------------------------------------------------------------------------------------------------------------------------------------------------------------------------------------------------------------------------------------------------------------------------------------------------------------------------------------------------------------------------------------------------------------------------------------------------------------------------------------------------------------------------------------------------------------------------------------------------------------------------------------------------------------------------------------------------------------------------------------------------------------------------------------------------------------------------------------------------------------------------------------------------------------------------------------------------------------------------------------------------------------------------------------------------------------------------------------------------------------------------------------------------------------------------------------------------------------------------------------------------------------------------------------------------------------------------------------------------------------------------------------------------------------------------------------------------------------------------------------------------------------------------------------------------------------------------------|
|    |          |          |          |          |                                                                                                                                                                                                                                                                                                                                                                                                                                                            |                                                                                                                                                                                                                                                                                                                                                                                                                                                                                                                                                                                                                                                                                                                                                                                                                                                                                                                                                                              | glomerular filtration rate, Estimated glomerular filtration rate in diabetes, Triglycerides, Circulating fibroblast growth factor 23 levels, Cortical surface area, Leukocyte telomere length, Lymphocyte counts, Non-alcoholic fatty liver disease activity score, Monocyte count, Systemic lupus erythematosus, anorexia nervosa, attention-deficit/hyperactivity disorder, autism spectrum disorder, bipolar disorder, major depression, obsessive-compulsive disorder, schizophrenia, or Tourette syndrome (pleiotropy), Lung function (FVC), Height                                                                                                                                                                                                                                                                                                                                                                                                                                                                                                                                                                                                                                                                                                                                                                                                                                                                                                                                                                                                                                                                                                                                                                                                                                                                                                       |
| 11 | 61264124 | 62097073 | 61604967 | 2.34E-08 | ENSG00000204950, LRRC10B, SYT7, ENSG0000011347, DAGLA, ENSG00000134780, MYRF, ENSG00000124920, TMEM258, ENSG00000134825, FEN1, ENSG00000168496, FADS2, ENSG00000134824, FADS1, ENSG00000149485, FADS3, ENSG00000221968, RAB31L1, ENSG00000167994, BEST1, ENSG00000167995, FTH1, ENSG00000167996, INCENP, ENSG00000149503, SCGB1D1, ENSG00000168515, SCGB2A1, ENSG00000124939, SCGB1D2, ENSG00000124935, SCGB2A2, ENSG00000110484, SCGB1D4, ENSG00000197745 | ENSG00000134824: HDL cholesterol, Triglycerides, Fasting blood glucose, Homeostasis model assessment of beta-cell function, Cholesterol, total, LDL cholesterol, Heart rate, Metabolic syndrome, Resting heart rate, Lipid metabolism phenotypes, Hematology traits, Liver enzyme levels (alkaline phosphatase), Comprehensive strength and appendicular lean mass, Metabolite levels, Response to statin therapy, Metabolic traits, Plasma omega-3 polyunsaturated fatty acid levels (docosapentaenoic acid), Plasma omega-3 polyunsaturated fatty acid levels (alpha-linolenic acid), Plasma omega-3 polyunsaturated fatty acid level (eicosapentaenoic acid), Platelet count, Fasting blood glucose (BMI interaction), Inflammatory bowel disease, Plasma omega-6 polyunsaturated fatty acid levels (gamma-linolenic acid), Plasma omega-6 polyunsaturated fatty acid levels (dihomo-gamma-linolenic acid), Plasma omega-6 polyunsaturated fatty acid levels (arachidonic | ENSG00000204950: Diastolic blood pressure, Systolic blood pressure, Systolic blood pressure (cigarette smoking interaction), Diastolic blood pressure (cigarette smoking interaction), Mean arterial pressure, Mean arterial pressure x alcohol consumption interaction (2df test), Diastolic blood pressure x alcohol consumption interaction (2df test), Hypertension, Medication use (agents acting on the renin-angiotensin system), Heel bone mineral density; ENSG0000011347: Intelligence (MTAG), Phosphatidylcholine levels, Cholesteryl ester levels, Educational attainment (years of education), Cognitive performance (MTAG), Cognitive performance; ENSG00000134780: Immune response to smallpox (secreted IL-2), Plasma omega-3 polyunsaturated fatty acid levels (docosapentaenoic acid), Plasma omega-6 polyunsaturated fatty acid levels (linoleic acid), 3-hydroxypropylmercapturic acid levels in smokers, Refractive error, Cerebrospinal fluid sTREM-2 levels, Spherical equivalent, C-reactive protein levels, Neuroticism, Positive affect, Depressive symptoms, Well-being spectrum (multivariate analysis), Life satisfaction, Depression, Lung function (FVC); ENSG00000124920: Plasma omega-3 polyunsaturated fatty acid levels (docosapentaenoic acid), Plasma omega-3 polyunsaturated fatty acid levels (alpha-linolenic acid), Plasma omega-3 polyunsaturated fatty acid level (eicosapentaenoic acid), Metabolite levels, Crohn's disease, Plasma omega-6 polyunsaturated fatty acid levels (gamma-linolenic acid), Plasma omega-6 polyunsaturated fatty acid levels (dihomo-gamma-linolenic acid), Plasma omega-6 polyunsaturated fatty acid levels (arachidonic acid), Hematocrit, Triglycerides, HDL cholesterol, Glycerophospholipid levels, Total cholesterol levels, Moyamoya disease, Resting heart rate, Red blood cell |

|  |  |  |  |  |  |                                                                                                                                                                                                                                                                                                                                                                                                                                                                                                                                                                                                                                                                                                                                                                                                                                                                                                                                                                                                                                                                                                                                                                                                                                                                                                                                    |                                                                                                                                                                                                                                                                                                                                                                                                                                                                                                                                                                                                                                                                                                                                                                                                                                                                                                                                                                                                                                                                                                                                                                                                                                                                                                                                                                                                                                                                                                                                                                                                                                                                                                                                                                                                                                                                                                                                                                                                                                                                                                                                                                                                                                                                                                                                                                                                                                                                                              |
|--|--|--|--|--|--|------------------------------------------------------------------------------------------------------------------------------------------------------------------------------------------------------------------------------------------------------------------------------------------------------------------------------------------------------------------------------------------------------------------------------------------------------------------------------------------------------------------------------------------------------------------------------------------------------------------------------------------------------------------------------------------------------------------------------------------------------------------------------------------------------------------------------------------------------------------------------------------------------------------------------------------------------------------------------------------------------------------------------------------------------------------------------------------------------------------------------------------------------------------------------------------------------------------------------------------------------------------------------------------------------------------------------------|----------------------------------------------------------------------------------------------------------------------------------------------------------------------------------------------------------------------------------------------------------------------------------------------------------------------------------------------------------------------------------------------------------------------------------------------------------------------------------------------------------------------------------------------------------------------------------------------------------------------------------------------------------------------------------------------------------------------------------------------------------------------------------------------------------------------------------------------------------------------------------------------------------------------------------------------------------------------------------------------------------------------------------------------------------------------------------------------------------------------------------------------------------------------------------------------------------------------------------------------------------------------------------------------------------------------------------------------------------------------------------------------------------------------------------------------------------------------------------------------------------------------------------------------------------------------------------------------------------------------------------------------------------------------------------------------------------------------------------------------------------------------------------------------------------------------------------------------------------------------------------------------------------------------------------------------------------------------------------------------------------------------------------------------------------------------------------------------------------------------------------------------------------------------------------------------------------------------------------------------------------------------------------------------------------------------------------------------------------------------------------------------------------------------------------------------------------------------------------------------|
|  |  |  |  |  |  | <p>acid), Delta-6 desaturase activity, Plasma omega-6 polyunsaturated fatty acid levels (linoleic acid), Eosinophil counts, C-reactive protein levels or LDL-cholesterol levels (pleiotropy), C-reactive protein levels or HDL-cholesterol levels (pleiotropy), C-reactive protein levels or triglyceride levels (pleiotropy), Metabolite levels (lipid measures), Gestational age at birth (child effect), Plateletcrit, Granulocyte percentage of myeloid white cells, Monocyte percentage of white cells, Glycerophospholipid levels, Sphingolipid levels, Vitiligo, Glycated hemoglobin levels, Total cholesterol levels, Heel bone mineral density, Non-albumin protein levels, Albumin-globulin ratio, Hemoglobin A1c levels, Alanine transaminase levels, Triglyceride levels, Breast milk fatty acid composition (maternal genotype effect), Breast milk fatty acid composition (infant genotype effect), Serum metabolite concentrations in chronic kidney disease, Serum metabolite ratios in chronic kidney disease, Low density lipoprotein cholesterol levels, Height, Apolipoprotein B levels, Pulse pressure, LDL cholesterol levels, LDL cholesterol levels x long total sleep time interaction (2df test), HDL cholesterol levels, Triglyceride levels x short total sleep time interaction (2df test), Serum</p> | <p>count, Serum total protein level, Serum metabolite concentrations in chronic kidney disease, Serum metabolite ratios in chronic kidney disease, Triglyceride levels x long total sleep time interaction (2df test), Serum metabolite levels (CMS), Heel bone mineral density, Hemoglobin levels, Spherical equivalent, Blood metabolite levels, Colorectal cancer, Serum omega-3 polyunsaturated fatty acid concentration in metabolic syndrome, Low density lipoprotein cholesterol levels, Serum metabolite levels, Chronic inflammatory diseases (ankylosing spondylitis, Crohn's disease, psoriasis, primary sclerosing cholangitis, ulcerative colitis) (pleiotropy), Hemoglobin concentration, Vaccenic acid (18:1n-7) levels, Gondoic acid (20:1n-9) levels, LDL cholesterol levels, Iron status biomarkers (total iron binding capacity), Trans fatty acid levels, High density lipoprotein cholesterol levels, Red blood cell fatty acid levels, Colorectal cancer or advanced adenoma, Phosphatidylcholine-ether levels, Phosphatidylethanolamine-ether levels, Asthma (adult onset), Asthma, Nasal polyps, Systolic blood pressure, Triglyceride levels, Glycemic traits (pleiotropy), Educational attainment (years of education), Respiratory diseases; ENSG00000134825: Crohn's disease, Metabolic syndrome, Palmitoleic acid (16:1n-7) levels, Stearic acid (18:0) levels, Oleic acid (18:1n-9) levels, Phospholipid levels (plasma), Plasma omega-3 polyunsaturated fatty acid levels (docosapentaenoic acid), Plasma omega-3 polyunsaturated fatty acid level (eicosapentaenoic acid), Plasma omega-3 polyunsaturated fatty acid levels (alpha-linolenic acid), Metabolite levels, Plasma omega-6 polyunsaturated fatty acid levels (gamma-linolenic acid), Plasma omega-6 polyunsaturated fatty acid levels (dihomo-gamma-linolenic acid), Plasma omega-6 polyunsaturated fatty acid levels (arachidonic acid), Hematocrit, Triglycerides, HDL cholesterol, Glycerophospholipid levels, Total cholesterol levels, Resting heart rate, Red blood cell count, Serum total protein level, Irritable mood, Serum metabolite concentrations in chronic kidney disease, Serum metabolite ratios in chronic kidney disease, LDL cholesterol levels x short total sleep time interaction (2df test), Triglyceride levels x long total sleep time interaction (2df test), Serum metabolite levels (CMS), Heel bone mineral density, Hemoglobin levels, Spherical equivalent,</p> |
|--|--|--|--|--|--|------------------------------------------------------------------------------------------------------------------------------------------------------------------------------------------------------------------------------------------------------------------------------------------------------------------------------------------------------------------------------------------------------------------------------------------------------------------------------------------------------------------------------------------------------------------------------------------------------------------------------------------------------------------------------------------------------------------------------------------------------------------------------------------------------------------------------------------------------------------------------------------------------------------------------------------------------------------------------------------------------------------------------------------------------------------------------------------------------------------------------------------------------------------------------------------------------------------------------------------------------------------------------------------------------------------------------------|----------------------------------------------------------------------------------------------------------------------------------------------------------------------------------------------------------------------------------------------------------------------------------------------------------------------------------------------------------------------------------------------------------------------------------------------------------------------------------------------------------------------------------------------------------------------------------------------------------------------------------------------------------------------------------------------------------------------------------------------------------------------------------------------------------------------------------------------------------------------------------------------------------------------------------------------------------------------------------------------------------------------------------------------------------------------------------------------------------------------------------------------------------------------------------------------------------------------------------------------------------------------------------------------------------------------------------------------------------------------------------------------------------------------------------------------------------------------------------------------------------------------------------------------------------------------------------------------------------------------------------------------------------------------------------------------------------------------------------------------------------------------------------------------------------------------------------------------------------------------------------------------------------------------------------------------------------------------------------------------------------------------------------------------------------------------------------------------------------------------------------------------------------------------------------------------------------------------------------------------------------------------------------------------------------------------------------------------------------------------------------------------------------------------------------------------------------------------------------------------|

|  |  |  |  |  |  |                                                                                                                                                                                                                                                                                                                                                                                                                                                                                                                                                                                                                                                                                                                                                                                                                                                                                                                                                                                                                                                                                                                                                                                                                                                                 |                                                                                                                                                                                                                                                                                                                                                                                                                                                                                                                                                                                                                                                                                                                                                                                                                                                                                                                                                                                                                                                                                                                                                                                                                                                                                                                                                                                                                                                                                                                                                                                                                                                                                                                                                                                                                                                                                                                                                                                                                                                                                                                                                                                                                                                                                                                                                                                                                                                                                                     |
|--|--|--|--|--|--|-----------------------------------------------------------------------------------------------------------------------------------------------------------------------------------------------------------------------------------------------------------------------------------------------------------------------------------------------------------------------------------------------------------------------------------------------------------------------------------------------------------------------------------------------------------------------------------------------------------------------------------------------------------------------------------------------------------------------------------------------------------------------------------------------------------------------------------------------------------------------------------------------------------------------------------------------------------------------------------------------------------------------------------------------------------------------------------------------------------------------------------------------------------------------------------------------------------------------------------------------------------------|-----------------------------------------------------------------------------------------------------------------------------------------------------------------------------------------------------------------------------------------------------------------------------------------------------------------------------------------------------------------------------------------------------------------------------------------------------------------------------------------------------------------------------------------------------------------------------------------------------------------------------------------------------------------------------------------------------------------------------------------------------------------------------------------------------------------------------------------------------------------------------------------------------------------------------------------------------------------------------------------------------------------------------------------------------------------------------------------------------------------------------------------------------------------------------------------------------------------------------------------------------------------------------------------------------------------------------------------------------------------------------------------------------------------------------------------------------------------------------------------------------------------------------------------------------------------------------------------------------------------------------------------------------------------------------------------------------------------------------------------------------------------------------------------------------------------------------------------------------------------------------------------------------------------------------------------------------------------------------------------------------------------------------------------------------------------------------------------------------------------------------------------------------------------------------------------------------------------------------------------------------------------------------------------------------------------------------------------------------------------------------------------------------------------------------------------------------------------------------------------------------|
|  |  |  |  |  |  | <p>metabolite levels (CMS), HDL cholesterol levels x long total sleep time interaction (2df test), HDL cholesterol levels x short total sleep time interaction (2df test), HDL cholesterol levels x alcohol consumption (regular vs non-regular drinkers) interaction (2df), Triglyceride levels x alcohol consumption (regular vs non-regular drinkers) interaction (2df), Bipolar I disorder, Apolipoprotein A1 levels, Neutrophil count, Colorectal cancer, QRS duration, Crohn's disease, Age-related disease endophenotypes, Sum basophil neutrophil counts, Red cell distribution width, P wave duration, Blood metabolite levels, Blood metabolite ratios, Rheumatoid arthritis, QT interval, Iron status biomarkers (transferrin levels), Serum metabolite levels, Change in serum metabolite levels (CMS), Serum omega-3 polyunsaturated fatty acid concentration in metabolic syndrome, Serum omega-6 to omega-3 polyunsaturated fatty acid ratio in metabolic syndrome, Serum docosahexaenoic fatty acid concentration in metabolic syndrome, Delta-5 desaturase activity response to n3-polyunsaturated fat supplement, Change in serum metabolite levels, LDL cholesterol x physical activity interaction (2df test), High density lipoprotein</p> | <p>Blood metabolite levels, Colorectal cancer, Serum omega-3 polyunsaturated fatty acid concentration in metabolic syndrome, Serum metabolite levels, Blond vs. brown/black hair color, Low density lipoprotein cholesterol levels, Bipolar disorder or major depressive disorder, Chronic inflammatory diseases (ankylosing spondylitis, Crohn's disease, psoriasis, primary sclerosing cholangitis, ulcerative colitis) (pleiotropy), Hemoglobin concentration, Vaccenic acid (18:1n-7) levels, Gondoic acid (20:1n-9) levels, LDL cholesterol levels, Iron status biomarkers (total iron binding capacity), Trans fatty acid levels, High density lipoprotein cholesterol levels, Carboplatin disposition in epithelial ovarian cancer, Red blood cell fatty acid levels, Colorectal cancer or advanced adenoma, Phosphatidylcholine-ether levels, Phosphatidylcholine levels, Phosphatidylethanolamine-ether levels, Cholesteryl ester levels, Asthma (adult onset), Asthma, Nasal polyps, Triglyceride levels, Glycemic traits (pleiotropy), Educational attainment (years of education), Respiratory diseases, Hair color; ENSG00000168496: Plasma omega-3 polyunsaturated fatty acid levels (docosapentaenoic acid), Plasma omega-3 polyunsaturated fatty acid levels (alpha-linolenic acid), Plasma omega-3 polyunsaturated fatty acid level (eicosapentaenoic acid), Platelet count, Inflammatory bowel disease, Crohn's disease, Trans fatty acid levels, Metabolite levels, Red blood cell fatty acid levels, Colorectal cancer; ENSG00000134824: HDL cholesterol, Triglycerides, Fasting blood glucose, Homeostasis model assessment of beta-cell function, Cholesterol, total, LDL cholesterol, Heart rate, Metabolic syndrome, Resting heart rate, Lipid metabolism phenotypes, Hematology traits, Liver enzyme levels (alkaline phosphatase), Comprehensive strength and appendicular lean mass, Metabolite levels, Response to statin therapy, Metabolic traits, Plasma omega-3 polyunsaturated fatty acid levels (docosapentaenoic acid), Plasma omega-3 polyunsaturated fatty acid levels (alpha-linolenic acid), Plasma omega-3 polyunsaturated fatty acid level (eicosapentaenoic acid), Platelet count, Fasting blood glucose (BMI interaction), Inflammatory bowel disease, Plasma omega-6 polyunsaturated fatty acid levels (gamma-linolenic acid), Plasma omega-6 polyunsaturated fatty acid levels (dihomo-gamma-linolenic acid), Plasma omega-6 polyunsaturated fatty</p> |
|--|--|--|--|--|--|-----------------------------------------------------------------------------------------------------------------------------------------------------------------------------------------------------------------------------------------------------------------------------------------------------------------------------------------------------------------------------------------------------------------------------------------------------------------------------------------------------------------------------------------------------------------------------------------------------------------------------------------------------------------------------------------------------------------------------------------------------------------------------------------------------------------------------------------------------------------------------------------------------------------------------------------------------------------------------------------------------------------------------------------------------------------------------------------------------------------------------------------------------------------------------------------------------------------------------------------------------------------|-----------------------------------------------------------------------------------------------------------------------------------------------------------------------------------------------------------------------------------------------------------------------------------------------------------------------------------------------------------------------------------------------------------------------------------------------------------------------------------------------------------------------------------------------------------------------------------------------------------------------------------------------------------------------------------------------------------------------------------------------------------------------------------------------------------------------------------------------------------------------------------------------------------------------------------------------------------------------------------------------------------------------------------------------------------------------------------------------------------------------------------------------------------------------------------------------------------------------------------------------------------------------------------------------------------------------------------------------------------------------------------------------------------------------------------------------------------------------------------------------------------------------------------------------------------------------------------------------------------------------------------------------------------------------------------------------------------------------------------------------------------------------------------------------------------------------------------------------------------------------------------------------------------------------------------------------------------------------------------------------------------------------------------------------------------------------------------------------------------------------------------------------------------------------------------------------------------------------------------------------------------------------------------------------------------------------------------------------------------------------------------------------------------------------------------------------------------------------------------------------------|

|  |  |  |  |  |  |                                                                                                                                                                                                                                                                                                                                                                                                                                                                                                                                                                                                                                                                                                                                                                                                                                                                                                                                                                                                                                                                                                                                                                                                                                                                                       |                                                                                                                                                                                                                                                                                                                                                                                                                                                                                                                                                                                                                                                                                                                                                                                                                                                                                                                                                                                                                                                                                                                                                                                                                                                                                                                                                                                                                                                                                                                                                                                                                                                                                                                                                                                                                                                                                                                                                                                                                                                                                                                                                                                                                                                                                                                                                                                                                                                                                                                                                                     |
|--|--|--|--|--|--|---------------------------------------------------------------------------------------------------------------------------------------------------------------------------------------------------------------------------------------------------------------------------------------------------------------------------------------------------------------------------------------------------------------------------------------------------------------------------------------------------------------------------------------------------------------------------------------------------------------------------------------------------------------------------------------------------------------------------------------------------------------------------------------------------------------------------------------------------------------------------------------------------------------------------------------------------------------------------------------------------------------------------------------------------------------------------------------------------------------------------------------------------------------------------------------------------------------------------------------------------------------------------------------|---------------------------------------------------------------------------------------------------------------------------------------------------------------------------------------------------------------------------------------------------------------------------------------------------------------------------------------------------------------------------------------------------------------------------------------------------------------------------------------------------------------------------------------------------------------------------------------------------------------------------------------------------------------------------------------------------------------------------------------------------------------------------------------------------------------------------------------------------------------------------------------------------------------------------------------------------------------------------------------------------------------------------------------------------------------------------------------------------------------------------------------------------------------------------------------------------------------------------------------------------------------------------------------------------------------------------------------------------------------------------------------------------------------------------------------------------------------------------------------------------------------------------------------------------------------------------------------------------------------------------------------------------------------------------------------------------------------------------------------------------------------------------------------------------------------------------------------------------------------------------------------------------------------------------------------------------------------------------------------------------------------------------------------------------------------------------------------------------------------------------------------------------------------------------------------------------------------------------------------------------------------------------------------------------------------------------------------------------------------------------------------------------------------------------------------------------------------------------------------------------------------------------------------------------------------------|
|  |  |  |  |  |  | <p>cholesterol levels, Asthma, Bipolar disorder, Male-pattern baldness, Nonatopic asthma, Osteoporosis-related phenotypes (MTAG), Granulocyte count, Age-related diseases, mortality and associated endophenotypes, Sum neutrophil eosinophil counts, Gondoic acid (20:1n-9) levels, Sum eosinophil basophil counts, Myeloid white cell count, White blood cell count, Mean platelet volume, Trans fatty acid levels, Red blood cell fatty acid levels, Plasma omega-6 polyunsaturated fatty acid levels (adrenic acid), Laryngeal squamous cell carcinoma, Lung cancer in ever smokers, Triacylglycerol 56:6 levels, Metabolite risk score for predicting weight gain, Fatty acid desaturase activity (serum), Fatty acid desaturase activity (adipose tissue), Phosphatidylcholine levels, Phosphatidylcholine-ether levels, Phosphatidylethanolamine levels, Lysophosphatidylethanolamine levels, Phosphatidylethanolamine-ether levels, Phosphatidylinositol levels, Cholesteryl ester levels, Sphingomyelin levels, Lysophosphatidylcholine levels, Triacylglyceride levels, HDL cholesterol levels in current drinkers, LDL cholesterol levels in current drinkers, Triglyceride levels in current drinkers, HDL cholesterol levels x alcohol consumption (drinkers vs non-</p> | <p>acid levels (arachidonic acid), Delta-6 desaturase activity, Plasma omega-6 polyunsaturated fatty acid levels (linoleic acid), Eosinophil counts, C-reactive protein levels or LDL-cholesterol levels (pleiotropy), C-reactive protein levels or HDL-cholesterol levels (pleiotropy), C-reactive protein levels or triglyceride levels (pleiotropy), Metabolite levels (lipid measures), Gestational age at birth (child effect), Plateletcrit, Granulocyte percentage of myeloid white cells, Monocyte percentage of white cells, Glycerophospholipid levels, Sphingolipid levels, Vitiligo, Glycated hemoglobin levels, Total cholesterol levels, Heel bone mineral density, Non-albumin protein levels, Albumin-globulin ratio, Hemoglobin A1c levels, Alanine transaminase levels, Triglyceride levels, Breast milk fatty acid composition (maternal genotype effect), Breast milk fatty acid composition (infant genotype effect), Serum metabolite concentrations in chronic kidney disease, Serum metabolite ratios in chronic kidney disease, Low density lipoprotein cholesterol levels, Height, Apolipoprotein B levels, Pulse pressure, LDL cholesterol levels, LDL cholesterol levels x long total sleep time interaction (2df test), HDL cholesterol levels, Triglyceride levels x short total sleep time interaction (2df test), Serum metabolite levels (CMS), HDL cholesterol levels x long total sleep time interaction (2df test), HDL cholesterol levels x short total sleep time interaction (2df test), HDL cholesterol levels x alcohol consumption (regular vs non-regular drinkers) interaction (2df), Triglyceride levels x alcohol consumption (regular vs non-regular drinkers) interaction (2df), Bipolar I disorder, Apolipoprotein A1 levels, Neutrophil count, Colorectal cancer, QRS duration, Crohn's disease, Age-related disease endophenotypes, Sum basophil neutrophil counts, Red cell distribution width, P wave duration, Blood metabolite levels, Blood metabolite ratios, Rheumatoid arthritis, QT interval, Iron status biomarkers (transferrin levels), Serum metabolite levels, Change in serum metabolite levels (CMS), Serum omega-3 polyunsaturated fatty acid concentration in metabolic syndrome, Serum omega-6 to omega-3 polyunsaturated fatty acid ratio in metabolic syndrome, Serum docosahexaenoic fatty acid concentration in metabolic syndrome, Delta-5 desaturase activity response to n3-polyunsaturated fat supplement, Change in serum metabolite levels, LDL cholesterol x physical activity</p> |
|--|--|--|--|--|--|---------------------------------------------------------------------------------------------------------------------------------------------------------------------------------------------------------------------------------------------------------------------------------------------------------------------------------------------------------------------------------------------------------------------------------------------------------------------------------------------------------------------------------------------------------------------------------------------------------------------------------------------------------------------------------------------------------------------------------------------------------------------------------------------------------------------------------------------------------------------------------------------------------------------------------------------------------------------------------------------------------------------------------------------------------------------------------------------------------------------------------------------------------------------------------------------------------------------------------------------------------------------------------------|---------------------------------------------------------------------------------------------------------------------------------------------------------------------------------------------------------------------------------------------------------------------------------------------------------------------------------------------------------------------------------------------------------------------------------------------------------------------------------------------------------------------------------------------------------------------------------------------------------------------------------------------------------------------------------------------------------------------------------------------------------------------------------------------------------------------------------------------------------------------------------------------------------------------------------------------------------------------------------------------------------------------------------------------------------------------------------------------------------------------------------------------------------------------------------------------------------------------------------------------------------------------------------------------------------------------------------------------------------------------------------------------------------------------------------------------------------------------------------------------------------------------------------------------------------------------------------------------------------------------------------------------------------------------------------------------------------------------------------------------------------------------------------------------------------------------------------------------------------------------------------------------------------------------------------------------------------------------------------------------------------------------------------------------------------------------------------------------------------------------------------------------------------------------------------------------------------------------------------------------------------------------------------------------------------------------------------------------------------------------------------------------------------------------------------------------------------------------------------------------------------------------------------------------------------------------|

|  |  |  |  |  |  |                                                                                                                                                                                                                                                                                                                                                                                                                                                                                                                                                                                                                                                                                                                                                                                                                                                                                                                                                                                                                                                                                                                                                                              |                                                                                                                                                                                                                                                                                                                                                                                                                                                                                                                                                                                                                                                                                                                                                                                                                                                                                                                                                                                                                                                                                                                                                                                                                                                                                                                                                                                                                                                                                                                                                                                                                                                                                                                                                                                                                                                                                                                                                                                                                                                                                                                                                                                                                                                                                                                                                                                                                                                                                                              |
|--|--|--|--|--|--|------------------------------------------------------------------------------------------------------------------------------------------------------------------------------------------------------------------------------------------------------------------------------------------------------------------------------------------------------------------------------------------------------------------------------------------------------------------------------------------------------------------------------------------------------------------------------------------------------------------------------------------------------------------------------------------------------------------------------------------------------------------------------------------------------------------------------------------------------------------------------------------------------------------------------------------------------------------------------------------------------------------------------------------------------------------------------------------------------------------------------------------------------------------------------|--------------------------------------------------------------------------------------------------------------------------------------------------------------------------------------------------------------------------------------------------------------------------------------------------------------------------------------------------------------------------------------------------------------------------------------------------------------------------------------------------------------------------------------------------------------------------------------------------------------------------------------------------------------------------------------------------------------------------------------------------------------------------------------------------------------------------------------------------------------------------------------------------------------------------------------------------------------------------------------------------------------------------------------------------------------------------------------------------------------------------------------------------------------------------------------------------------------------------------------------------------------------------------------------------------------------------------------------------------------------------------------------------------------------------------------------------------------------------------------------------------------------------------------------------------------------------------------------------------------------------------------------------------------------------------------------------------------------------------------------------------------------------------------------------------------------------------------------------------------------------------------------------------------------------------------------------------------------------------------------------------------------------------------------------------------------------------------------------------------------------------------------------------------------------------------------------------------------------------------------------------------------------------------------------------------------------------------------------------------------------------------------------------------------------------------------------------------------------------------------------------------|
|  |  |  |  |  |  | <p>drinkers) interaction (2df), Triglyceride levels x alcohol consumption (drinkers vs non-drinkers) interaction (2df), LDL cholesterol levels x alcohol consumption (drinkers vs non-drinkers) interaction (2df), LDL cholesterol levels x alcohol consumption (regular vs non-regular drinkers) interaction (2df), Red blood cell count, Aortic valve stenosis, Sleep duration, Hematocrit, Hemoglobin concentration, Total triglycerides levels, Lymphocyte counts, Mean corpuscular hemoglobin concentration, PR interval, Type 2 diabetes, Mean corpuscular volume, IgA levels, Adult onset asthma or type 2 diabetes, Nonatopic asthma or type 2 diabetes, Adult onset asthma or fasting glucose levels, Nonatopic asthma or fasting glucose levels, Asthma (adult onset), Medication use (thyroid preparations), Medication use (adrenergics, inhalants), Urate levels, Gallstone disease, anorexia nervosa, attention-deficit/hyperactivity disorder, autism spectrum disorder, bipolar disorder, major depression, obsessive-compulsive disorder, schizophrenia, or Tourette syndrome (pleiotropy), QT dynamics during exercise, Balding type 1, Hypothyroidism</p> | <p>interaction (2df test), High density lipoprotein cholesterol levels, Asthma, Bipolar disorder, Male-pattern baldness, Nonatopic asthma, Osteoporosis-related phenotypes (MTAG), Granulocyte count, Age-related diseases, mortality and associated endophenotypes, Sum neutrophil eosinophil counts, Gondoic acid (20:1n-9) levels, Sum eosinophil basophil counts, Myeloid white cell count, White blood cell count, Mean platelet volume, Trans fatty acid levels, Red blood cell fatty acid levels, Plasma omega-6 polyunsaturated fatty acid levels (adrenic acid), Laryngeal squamous cell carcinoma, Lung cancer in ever smokers, Triacylglycerol 56:6 levels, Metabolite risk score for predicting weight gain, Fatty acid desaturase activity (serum), Fatty acid desaturase activity (adipose tissue), Phosphatidylcholine levels, Phosphatidylcholine-ether levels, Phosphatidylethanolamine levels, Lysophosphatidylethanolamine levels, Phosphatidylethanolamine-ether levels, Phosphatidylinositol levels, Cholesteryl ester levels, Sphingomyelin levels, Lysophosphatidylcholine levels, Triacylglyceride levels, HDL cholesterol levels in current drinkers, LDL cholesterol levels in current drinkers, Triglyceride levels in current drinkers, HDL cholesterol levels x alcohol consumption (drinkers vs non-drinkers) interaction (2df), Triglyceride levels x alcohol consumption (drinkers vs non-drinkers) interaction (2df), LDL cholesterol levels x alcohol consumption (drinkers vs non-drinkers) interaction (2df), LDL cholesterol levels x alcohol consumption (regular vs non-regular drinkers) interaction (2df), Red blood cell count, Aortic valve stenosis, Sleep duration, Hematocrit, Hemoglobin concentration, Total triglycerides levels, Lymphocyte counts, Mean corpuscular hemoglobin concentration, PR interval, Type 2 diabetes, Mean corpuscular volume, IgA levels, Adult onset asthma or type 2 diabetes, Nonatopic asthma or type 2 diabetes, Adult onset asthma or fasting glucose levels, Nonatopic asthma or fasting glucose levels, Asthma (adult onset), Medication use (thyroid preparations), Medication use (adrenergics, inhalants), Urate levels, Gallstone disease, anorexia nervosa, attention-deficit/hyperactivity disorder, autism spectrum disorder, bipolar disorder, major depression, obsessive-compulsive disorder, schizophrenia, or Tourette syndrome (pleiotropy), QT dynamics during exercise, Balding type 1, Hypothyroidism;</p> |
|--|--|--|--|--|--|------------------------------------------------------------------------------------------------------------------------------------------------------------------------------------------------------------------------------------------------------------------------------------------------------------------------------------------------------------------------------------------------------------------------------------------------------------------------------------------------------------------------------------------------------------------------------------------------------------------------------------------------------------------------------------------------------------------------------------------------------------------------------------------------------------------------------------------------------------------------------------------------------------------------------------------------------------------------------------------------------------------------------------------------------------------------------------------------------------------------------------------------------------------------------|--------------------------------------------------------------------------------------------------------------------------------------------------------------------------------------------------------------------------------------------------------------------------------------------------------------------------------------------------------------------------------------------------------------------------------------------------------------------------------------------------------------------------------------------------------------------------------------------------------------------------------------------------------------------------------------------------------------------------------------------------------------------------------------------------------------------------------------------------------------------------------------------------------------------------------------------------------------------------------------------------------------------------------------------------------------------------------------------------------------------------------------------------------------------------------------------------------------------------------------------------------------------------------------------------------------------------------------------------------------------------------------------------------------------------------------------------------------------------------------------------------------------------------------------------------------------------------------------------------------------------------------------------------------------------------------------------------------------------------------------------------------------------------------------------------------------------------------------------------------------------------------------------------------------------------------------------------------------------------------------------------------------------------------------------------------------------------------------------------------------------------------------------------------------------------------------------------------------------------------------------------------------------------------------------------------------------------------------------------------------------------------------------------------------------------------------------------------------------------------------------------------|

|  |  |  |  |  |  |  |  |                                                                                                                                                                                                                                                                                                                                                                                                                                                                                                                                                                                                                                                                                                                                                                                                                                                                                                                                                                                                                                                                                                                                                                                                                                                                                                                                                                                                                                                                                                                                                                                                                                                                                                                                                                                                                                                                                                                                                                                                                                                                                                                                                                                                                                                                                                                                                                                                                                                                                                                                                        |
|--|--|--|--|--|--|--|--|--------------------------------------------------------------------------------------------------------------------------------------------------------------------------------------------------------------------------------------------------------------------------------------------------------------------------------------------------------------------------------------------------------------------------------------------------------------------------------------------------------------------------------------------------------------------------------------------------------------------------------------------------------------------------------------------------------------------------------------------------------------------------------------------------------------------------------------------------------------------------------------------------------------------------------------------------------------------------------------------------------------------------------------------------------------------------------------------------------------------------------------------------------------------------------------------------------------------------------------------------------------------------------------------------------------------------------------------------------------------------------------------------------------------------------------------------------------------------------------------------------------------------------------------------------------------------------------------------------------------------------------------------------------------------------------------------------------------------------------------------------------------------------------------------------------------------------------------------------------------------------------------------------------------------------------------------------------------------------------------------------------------------------------------------------------------------------------------------------------------------------------------------------------------------------------------------------------------------------------------------------------------------------------------------------------------------------------------------------------------------------------------------------------------------------------------------------------------------------------------------------------------------------------------------------|
|  |  |  |  |  |  |  |  | <p>ENSG00000149485: HDL cholesterol, Triglycerides, Fasting blood glucose, Homeostasis model assessment of beta-cell function, LDL cholesterol, Heart rate, Metabolic syndrome, Resting heart rate, Lipid metabolism phenotypes, Hematology traits, Comprehensive strength and appendicular lean mass, Metabolite levels, Cholesterol, total, Metabolic traits, Plasma omega-3 polyunsaturated fatty acid levels (alpha-linolenic acid), Plasma omega-3 polyunsaturated fatty acid level (eicosapentaenoic acid), Plasma omega-3 polyunsaturated fatty acid levels (docosapentaenoic acid), Fasting blood glucose (BMI interaction), Plasma omega-6 polyunsaturated fatty acid levels (gamma-linolenic acid), Plasma omega-6 polyunsaturated fatty acid levels (dihomo-gamma-linolenic acid), Delta-6 desaturase activity, Plasma omega-6 polyunsaturated fatty acid levels (linoleic acid), Eosinophil counts, Platelet count, C-reactive protein levels or HDL-cholesterol levels (pleiotropy), C-reactive protein levels or triglyceride levels (pleiotropy), Metabolite levels (lipid measures), Granulocyte percentage of myeloid white cells, Monocyte percentage of white cells, Glycerophospholipid levels, Sphingolipid levels, Vitiligo, Total cholesterol levels, Alanine transaminase levels, Triglyceride levels, Breast milk fatty acid composition (maternal genotype effect), Breast milk fatty acid composition (infant genotype effect), Serum metabolite concentrations in chronic kidney disease, Serum metabolite ratios in chronic kidney disease, Low density lipoprotein cholesterol levels, Apolipoprotein B levels, Pulse pressure, LDL cholesterol levels, LDL cholesterol levels x long total sleep time interaction (2df test), HDL cholesterol levels, Triglyceride levels x short total sleep time interaction (2df test), Serum metabolite levels (CMS), HDL cholesterol levels x long total sleep time interaction (2df test), HDL cholesterol levels x short total sleep time interaction (2df test), HDL cholesterol levels x alcohol consumption (regular vs non-regular drinkers) interaction (2df), Triglyceride levels x alcohol consumption (regular vs non-regular drinkers) interaction (2df), Bipolar I disorder, Apolipoprotein A1 levels, Age-related disease endophenotypes, Red cell distribution width, Height, Blood metabolite levels, Blood metabolite ratios, Rheumatoid arthritis, Serum metabolite levels, Change in serum metabolite levels (CMS), Serum omega-3 polyunsaturated fatty acid</p> |
|--|--|--|--|--|--|--|--|--------------------------------------------------------------------------------------------------------------------------------------------------------------------------------------------------------------------------------------------------------------------------------------------------------------------------------------------------------------------------------------------------------------------------------------------------------------------------------------------------------------------------------------------------------------------------------------------------------------------------------------------------------------------------------------------------------------------------------------------------------------------------------------------------------------------------------------------------------------------------------------------------------------------------------------------------------------------------------------------------------------------------------------------------------------------------------------------------------------------------------------------------------------------------------------------------------------------------------------------------------------------------------------------------------------------------------------------------------------------------------------------------------------------------------------------------------------------------------------------------------------------------------------------------------------------------------------------------------------------------------------------------------------------------------------------------------------------------------------------------------------------------------------------------------------------------------------------------------------------------------------------------------------------------------------------------------------------------------------------------------------------------------------------------------------------------------------------------------------------------------------------------------------------------------------------------------------------------------------------------------------------------------------------------------------------------------------------------------------------------------------------------------------------------------------------------------------------------------------------------------------------------------------------------------|

|  |  |  |  |  |  |  |  |                                                                                                                                                                                                                                                                                                                                                                                                                                                                                                                                                                                                                                                                                                                                                                                                                                                                                                                                                                                                                                                                                                                                                                                                                                                                                                                                                                                                                                                                                                                                                                                                                                                                                                                                                                                                                                                                                                                                                                                                                                                                                                                                                                                                                                                                                                                                                                                                                                                                                  |
|--|--|--|--|--|--|--|--|----------------------------------------------------------------------------------------------------------------------------------------------------------------------------------------------------------------------------------------------------------------------------------------------------------------------------------------------------------------------------------------------------------------------------------------------------------------------------------------------------------------------------------------------------------------------------------------------------------------------------------------------------------------------------------------------------------------------------------------------------------------------------------------------------------------------------------------------------------------------------------------------------------------------------------------------------------------------------------------------------------------------------------------------------------------------------------------------------------------------------------------------------------------------------------------------------------------------------------------------------------------------------------------------------------------------------------------------------------------------------------------------------------------------------------------------------------------------------------------------------------------------------------------------------------------------------------------------------------------------------------------------------------------------------------------------------------------------------------------------------------------------------------------------------------------------------------------------------------------------------------------------------------------------------------------------------------------------------------------------------------------------------------------------------------------------------------------------------------------------------------------------------------------------------------------------------------------------------------------------------------------------------------------------------------------------------------------------------------------------------------------------------------------------------------------------------------------------------------|
|  |  |  |  |  |  |  |  | concentration in metabolic syndrome, Serum omega-6 to omega-3 polyunsaturated fatty acid ratio in metabolic syndrome, Serum docosahexaenoic fatty acid concentration in metabolic syndrome, Delta-5 desaturase activity response to n3-polyunsaturated fat supplement, Change in serum metabolite levels, LDL cholesterol x physical activity interaction (2df test), High density lipoprotein cholesterol levels, Asthma, Bipolar disorder, Osteoporosis-related phenotypes (MTAG), Granulocyte count, Age-related diseases, mortality and associated endophenotypes, Sum neutrophil eosinophil counts, Sum eosinophil basophil counts, Myeloid white cell count, White blood cell count, Mean platelet volume, Trans fatty acid levels, Red blood cell fatty acid levels, Plasma omega-6 polyunsaturated fatty acid levels (arachidonic acid), Plasma omega-6 polyunsaturated fatty acid levels (adrenic acid), Laryngeal squamous cell carcinoma, Triacylglycerol 56:6 levels, Metabolite risk score for predicting weight gain, Fatty acid desaturase activity (serum), Fatty acid desaturase activity (adipose tissue), Phosphatidylcholine-ether levels, Lysophosphatidylethanolamine levels, Phosphatidylcholine levels, Phosphatidylethanolamine-ether levels, Phosphatidylinositol levels, Cholesteryl ester levels, Sphingomyelin levels, Lysophosphatidylcholine levels, Triacylglyceride levels, HDL cholesterol levels in current drinkers, LDL cholesterol levels in current drinkers, Triglyceride levels in current drinkers, HDL cholesterol levels x alcohol consumption (drinkers vs non-drinkers) interaction (2df), Triglyceride levels x alcohol consumption (drinkers vs non-drinkers) interaction (2df), LDL cholesterol levels x alcohol consumption (drinkers vs non-drinkers) interaction (2df), LDL cholesterol levels x alcohol consumption (regular vs non-regular drinkers) interaction (2df), Red blood cell count, QT interval, Aortic valve stenosis, Sleep duration, Neutrophil count, Total triglycerides levels, Mean corpuscular hemoglobin concentration, Mean corpuscular volume, IgA levels, Gallstone disease; ENSG00000221968: Sphingolipid levels, Metabolite levels, Phosphatidylcholine levels, Cholesteryl ester levels, Sphingolipid d18:1/d18:2 ratio, Urate levels; ENSG00000167994: Sphingolipid levels, Metabolite levels, Schizophrenia, Mean corpuscular hemoglobin; ENSG00000167995: Plasma omega-3 polyunsaturated fatty |
|--|--|--|--|--|--|--|--|----------------------------------------------------------------------------------------------------------------------------------------------------------------------------------------------------------------------------------------------------------------------------------------------------------------------------------------------------------------------------------------------------------------------------------------------------------------------------------------------------------------------------------------------------------------------------------------------------------------------------------------------------------------------------------------------------------------------------------------------------------------------------------------------------------------------------------------------------------------------------------------------------------------------------------------------------------------------------------------------------------------------------------------------------------------------------------------------------------------------------------------------------------------------------------------------------------------------------------------------------------------------------------------------------------------------------------------------------------------------------------------------------------------------------------------------------------------------------------------------------------------------------------------------------------------------------------------------------------------------------------------------------------------------------------------------------------------------------------------------------------------------------------------------------------------------------------------------------------------------------------------------------------------------------------------------------------------------------------------------------------------------------------------------------------------------------------------------------------------------------------------------------------------------------------------------------------------------------------------------------------------------------------------------------------------------------------------------------------------------------------------------------------------------------------------------------------------------------------|



|    |          |          |          |          |                                                                                                                                                                                                                                                                                                                                                                                                                                                                                                                                                                                                                            |                                                                                                                                                                                                                                                                                                        |                                                                                                                                                                                                                         |                                                                                                                                                                                                                                                                                                                                                                                                                                                                                                                                                                                                                                                                                                                                                                                                                                                                                                                                                                                                                                                                                                                                                                                                                                                                                                                                                                                                                                                                                                                                                                                                                                                                                                                                                                                                                                                                                                                                                  |
|----|----------|----------|----------|----------|----------------------------------------------------------------------------------------------------------------------------------------------------------------------------------------------------------------------------------------------------------------------------------------------------------------------------------------------------------------------------------------------------------------------------------------------------------------------------------------------------------------------------------------------------------------------------------------------------------------------------|--------------------------------------------------------------------------------------------------------------------------------------------------------------------------------------------------------------------------------------------------------------------------------------------------------|-------------------------------------------------------------------------------------------------------------------------------------------------------------------------------------------------------------------------|--------------------------------------------------------------------------------------------------------------------------------------------------------------------------------------------------------------------------------------------------------------------------------------------------------------------------------------------------------------------------------------------------------------------------------------------------------------------------------------------------------------------------------------------------------------------------------------------------------------------------------------------------------------------------------------------------------------------------------------------------------------------------------------------------------------------------------------------------------------------------------------------------------------------------------------------------------------------------------------------------------------------------------------------------------------------------------------------------------------------------------------------------------------------------------------------------------------------------------------------------------------------------------------------------------------------------------------------------------------------------------------------------------------------------------------------------------------------------------------------------------------------------------------------------------------------------------------------------------------------------------------------------------------------------------------------------------------------------------------------------------------------------------------------------------------------------------------------------------------------------------------------------------------------------------------------------|
|    |          |          |          |          |                                                                                                                                                                                                                                                                                                                                                                                                                                                                                                                                                                                                                            |                                                                                                                                                                                                                                                                                                        | acid level (eicosapentaenoic acid), Metabolite levels; ENSG00000167996; ; ENSG00000149503: Prostate cancer, Breast cancer; ENSG00000168515; ; ENSG00000124939; ; ENSG00000124935; ; ENSG00000110484; ; ENSG00000197745: |                                                                                                                                                                                                                                                                                                                                                                                                                                                                                                                                                                                                                                                                                                                                                                                                                                                                                                                                                                                                                                                                                                                                                                                                                                                                                                                                                                                                                                                                                                                                                                                                                                                                                                                                                                                                                                                                                                                                                  |
| 16 | 66852047 | 67871804 | 67473389 | 5.25E-08 | ENSG00000159593, ENSG00000168748, ENSG00000172840, ENSG00000166589, ENSG00000166592, ENSG00000166595, ENSG00000172831, ENSG00000172828, ENSG00000172824, ENSG00000067955, ENSG00000125149, ENSG00000237172, ENSG00000102871, ENSG00000135722, ENSG00000102878, ENSG00000140939, ENSG00000196123, ENSG00000179044, ENSG00000205250, ENSG00000102890, ENSG00000125122, ENSG00000168701, ENSG00000135723, ENSG00000135740, ENSG00000196155, ENSG00000168676, ENSG00000159708, ENSG00000159713, ENSG00000159714, ENSG00000176387, <b>ENSG00000159720</b> , ENSG00000159723, ENSG00000039523, ENSG00000102974, ENSG00000159753, | NAE1, CA7, PDP2, CDH16, RRAD, FAM96B, CES2, CES3, CES4A, CBF, C16orf70, B3GNT9, TRADD, FBXL8, HSF4, NOL3, KIAA0895L, EXOC3L1, E2F4, ELMO3, LRRC29, TMEM208, FHOD1, SLC9A5, PLEKHG4, KCTD19, LRRC36, TPPP3, ZDHHC1, HSD11B2, <b>ATP6VOD1</b> , AGRP, FAM65A, CTCF, RLTPR, ACD, PARD6A, ENKD1, C16orf86, | ENSG00000159720: Disease progression in age-related macular degeneration, Medication use (thyroid preparations)                                                                                                         | ENSG00000159593: HDL cholesterol levels, Apolipoprotein A1 levels; ENSG00000168748; ; ENSG00000172840: Diastolic blood pressure; ENSG00000166589: Blood protein levels in cardiovascular risk, HDL cholesterol levels x alcohol consumption (regular vs non-regular drinkers) interaction (2df), HDL cholesterol levels in current drinkers, HDL cholesterol levels x alcohol consumption (drinkers vs non-drinkers) interaction (2df); ENSG00000166592; ; ENSG00000166595; ; ENSG00000172831; ; ENSG00000172828: Heel bone mineral density, Blood protein levels; ENSG00000172824: Hemoglobin levels; ENSG00000067955: Mean corpuscular hemoglobin, Breast cancer specific mortality in estrogen receptor positive breast cancer, Blood protein levels, Red cell distribution width; ENSG00000125149: Adolescent idiopathic scoliosis, Height; ENSG00000237172; ; ENSG00000102871; ; ENSG00000135722; ; ENSG00000102878; ; ENSG00000140939; ; ENSG00000196123: Mean corpuscular volume, Heel bone mineral density; ENSG00000179044: Hemoglobin levels, Monocyte count; ENSG00000205250: Mean corpuscular volume, Mean corpuscular hemoglobin; ENSG00000102890: Intraocular pressure; ENSG00000125122: HDL cholesterol, Male-pattern baldness; ENSG00000168701; ; ENSG00000135723: Waist circumference adjusted for body mass index, Waist-to-hip ratio adjusted for BMI; ENSG00000135740; ; ENSG00000196155: Heel bone mineral density, Blood protein levels; ENSG00000168676: Waist circumference adjusted for body mass index, Waist circumference adjusted for BMI (adjusted for smoking behaviour), Waist circumference adjusted for BMI (joint analysis main effects and smoking interaction), Waist circumference adjusted for BMI in non-smokers, Body mass index, Height, Hypothyroidism; ENSG00000159708: Waist circumference adjusted for body mass index, Adolescent idiopathic scoliosis, Blood protein levels, Waist circumference |

|   |           |           |           |          |                                                                                                                                                             |                                                            |                  |                                                                                                                                                                                                                                                                                                                                                                                                                                                                                                                                                                                                                                                                                                                                                                                                                                                                                                                                                                                                                                                                                                                                                                                                                                                                                                                                                                                                                                                |
|---|-----------|-----------|-----------|----------|-------------------------------------------------------------------------------------------------------------------------------------------------------------|------------------------------------------------------------|------------------|------------------------------------------------------------------------------------------------------------------------------------------------------------------------------------------------------------------------------------------------------------------------------------------------------------------------------------------------------------------------------------------------------------------------------------------------------------------------------------------------------------------------------------------------------------------------------------------------------------------------------------------------------------------------------------------------------------------------------------------------------------------------------------------------------------------------------------------------------------------------------------------------------------------------------------------------------------------------------------------------------------------------------------------------------------------------------------------------------------------------------------------------------------------------------------------------------------------------------------------------------------------------------------------------------------------------------------------------------------------------------------------------------------------------------------------------|
|   |           |           |           |          | ENSG00000102977,<br>ENSG00000102981,<br>ENSG00000124074,<br>ENSG00000159761,<br>ENSG00000141098,<br>ENSG00000141084,<br>ENSG00000102904,<br>ENSG00000102901 | GFOD2,<br>RANBP10,<br>TSNAXIP1,<br>CENPT                   |                  | adjusted for BMI (joint analysis main effects and physical activity interaction), Waist circumference adjusted for BMI in active individuals, Waist-to-hip ratio adjusted for BMI, Waist-hip ratio, Waist-to-hip ratio adjusted for BMI (additive genetic model), Mean corpuscular hemoglobin, Eosinophil counts; ENSG00000159713; ; ENSG00000159714: Bone mineral density; ENSG00000176387; ; ENSG00000159720: Disease progression in age-related macular degeneration, Medication use (thyroid preparations); ENSG00000159723; ; ENSG00000039523: Heel bone mineral density, HDL cholesterol, Hemoglobin levels, Mean platelet volume, Lung function (FVC), Lung function (FEV1/FVC); ENSG00000102974: Emotional recognition, Mean corpuscular hemoglobin concentration; ENSG00000159753: HDL cholesterol levels x long total sleep time interaction (2df test), HDL cholesterol, Myopia (age of diagnosis), Lymphocyte counts, Eosinophil counts; ENSG00000102977: Obesity-related traits, Hemoglobin levels; ENSG00000102981; ; ENSG00000124074: Blood protein levels; ENSG00000159761; ; ENSG00000141098: HDL cholesterol, Male-pattern baldness, High density lipoprotein cholesterol levels; ENSG00000141084: Hematocrit, HDL cholesterol, Empathy quotient, Hemoglobin concentration, High density lipoprotein cholesterol levels; ENSG00000102904: Balding type 1; ENSG00000102901: Red blood cell count, Mean corpuscular hemoglobin |
| 2 | 154307589 | 154707589 | 154507589 | 6.80E-08 | ENSG00000177519                                                                                                                                             | RPRM                                                       | ENSG00000177519: | ENSG00000177519:                                                                                                                                                                                                                                                                                                                                                                                                                                                                                                                                                                                                                                                                                                                                                                                                                                                                                                                                                                                                                                                                                                                                                                                                                                                                                                                                                                                                                               |
| 5 | 94974878  | 95385933  | 95174878  | 8.07E-08 | ENSG00000175449,<br>ENSG00000145757,<br>ENSG00000164292,<br>ENSG00000173221,<br>ENSG00000236882,<br>ENSG00000118985                                         | RFESD,<br>SPATA9,<br>RHOBTB3,<br>GLRX,<br>C5orf27,<br>ELL2 | ENSG00000236882: | ENSG00000175449: Blood protein levels, Pharmacokinetics of antiepileptic drugs in severe mental disorder (concentration drug ratio); ENSG00000145757: Blood protein levels, Lung function (FEV1/FVC); ENSG00000164292: Metabolite levels, Adolescent idiopathic scoliosis; ENSG00000173221: Metabolite levels, Adolescent idiopathic scoliosis; ENSG00000236882; ; ENSG00000118985: IgG glycosylation, Multiple myeloma, Multiple myeloma and monoclonal gammopathy, Coronary artery calcified atherosclerotic plaque score in type 2 diabetes, Non-albumin protein levels, Albumin-globulin ratio, B-cell malignancies (chronic lymphocytic leukemia, Hodgkin lymphoma or multiple myeloma) (pleiotropy), Serum total protein level, IgG digalactosylation phenotypes (multivariate analysis), IgG sialylation phenotypes                                                                                                                                                                                                                                                                                                                                                                                                                                                                                                                                                                                                                     |

|    |          |          |          |          |                                                                                                                                                                                                                    |                                                                                         |                                                                                                                                                                                                                                                                                                                                                                                                                                                                                                                                                                                                                                                                                                                                                                                                                                                                                                                                                                                                                                                                                                                                                                                                                                                                                                                                                          |                                                                                                                                                                                                                                                                                                                                                                                                                                                                                                                                                                                                                                                                                                                                                                                                                                                                                                                                                                                                                                                                                                                                                                                                                                                                                                                                                                                                                                                                                                                |
|----|----------|----------|----------|----------|--------------------------------------------------------------------------------------------------------------------------------------------------------------------------------------------------------------------|-----------------------------------------------------------------------------------------|----------------------------------------------------------------------------------------------------------------------------------------------------------------------------------------------------------------------------------------------------------------------------------------------------------------------------------------------------------------------------------------------------------------------------------------------------------------------------------------------------------------------------------------------------------------------------------------------------------------------------------------------------------------------------------------------------------------------------------------------------------------------------------------------------------------------------------------------------------------------------------------------------------------------------------------------------------------------------------------------------------------------------------------------------------------------------------------------------------------------------------------------------------------------------------------------------------------------------------------------------------------------------------------------------------------------------------------------------------|----------------------------------------------------------------------------------------------------------------------------------------------------------------------------------------------------------------------------------------------------------------------------------------------------------------------------------------------------------------------------------------------------------------------------------------------------------------------------------------------------------------------------------------------------------------------------------------------------------------------------------------------------------------------------------------------------------------------------------------------------------------------------------------------------------------------------------------------------------------------------------------------------------------------------------------------------------------------------------------------------------------------------------------------------------------------------------------------------------------------------------------------------------------------------------------------------------------------------------------------------------------------------------------------------------------------------------------------------------------------------------------------------------------------------------------------------------------------------------------------------------------|
|    |          |          |          |          |                                                                                                                                                                                                                    |                                                                                         |                                                                                                                                                                                                                                                                                                                                                                                                                                                                                                                                                                                                                                                                                                                                                                                                                                                                                                                                                                                                                                                                                                                                                                                                                                                                                                                                                          | (multivariate analysis), Mean corpuscular hemoglobin, IgA levels, Mean corpuscular volume                                                                                                                                                                                                                                                                                                                                                                                                                                                                                                                                                                                                                                                                                                                                                                                                                                                                                                                                                                                                                                                                                                                                                                                                                                                                                                                                                                                                                      |
| 11 | 60728079 | 61159993 | 60928079 | 9.36E-08 | ENSG00000013725, <b>ENSG00000110448</b> , ENSG00000167987, ENSG00000229859, ENSG00000229183, ENSG00000256713, ENSG00000167992, ENSG00000167986, ENSG00000149476, ENSG00000162144, ENSG00000149483, ENSG00000187049 | <b>CD6, CD5, VPS37C</b> , PGA3, PGA4, PGA5, VWCE, DDB1, DAK, CYB561A3, TMEM138, TMEM216 | ENSG00000167987: Rheumatoid arthritis (ACPA-positive), Rheumatoid arthritis, Adolescent idiopathic scoliosis, Periventricular white matter hyperintensities                                                                                                                                                                                                                                                                                                                                                                                                                                                                                                                                                                                                                                                                                                                                                                                                                                                                                                                                                                                                                                                                                                                                                                                              | ENSG00000013725: Multiple sclerosis, Inflammatory bowel disease, Crohn's disease, Ulcerative colitis, Chronic inflammatory diseases (ankylosing spondylitis, Crohn's disease, psoriasis, primary sclerosing cholangitis, ulcerative colitis) (pleiotropy), CD6 levels; ENSG00000110448: ; ENSG00000167987: Rheumatoid arthritis (ACPA-positive), Rheumatoid arthritis, Adolescent idiopathic scoliosis, Periventricular white matter hyperintensities; ENSG00000229859: ; ENSG00000229183: ; ENSG00000256713: Height; ENSG00000167992: ; ENSG00000167986: ; ENSG00000149476: ; ENSG00000162144: ; ENSG00000149483: ; ENSG00000187049:                                                                                                                                                                                                                                                                                                                                                                                                                                                                                                                                                                                                                                                                                                                                                                                                                                                                          |
| 9  | 98012608 | 98509513 | 98296403 | 1.14E-07 | ENSG00000158169, ENSG00000185920                                                                                                                                                                                   | FANCC, PTCH1                                                                            | ENSG00000185920: Pulmonary function, Height, Pulmonary function (smoking interaction), Bone mineral density (spine), Bone mineral density (hip), Waist circumference adjusted for body mass index, Hip circumference adjusted for BMI, Nonsyndromic cleft lip with cleft palate, Birth weight, Heel bone mineral density, Neuroticism, Neuroticism, Feeling hurt, Feeling worry, Alanine aminotransferase levels in low alcohol consumption, Appendicular lean mass, Cortical surface area (visual PC2), Birth weight (MTAG), Birth length (MTAG), Monobrow, Intelligence, Worry, Lung function (FVC), Waist circumference adjusted for BMI (adjusted for smoking behaviour), Waist circumference adjusted for BMI (joint analysis main effects and smoking interaction), Waist circumference adjusted for BMI in non-smokers, 3-month functional outcome in ischaemic stroke (modified Rankin score), Cortical surface area, Depressive symptoms, Positive affect, Offspring birth weight, Lung function (FEV1/FVC), Well-being spectrum (multivariate analysis), White matter microstructure (fractional anisotropy), Type 2 diabetes, Life satisfaction, Macular thickness, Sensitivity to environmental stress and adversity, Cognitive performance, Cognitive performance (MTAG), Highest math class taken (MTAG), White blood cell count, Sunburns | ENSG00000158169: Cortical surface area (visual PC2), Hematocrit, Waist circumference adjusted for body mass index, Heel bone mineral density, Height; ENSG00000185920: Pulmonary function, Height, Pulmonary function (smoking interaction), Bone mineral density (spine), Bone mineral density (hip), Waist circumference adjusted for body mass index, Hip circumference adjusted for BMI, Nonsyndromic cleft lip with cleft palate, Birth weight, Heel bone mineral density, Neuroticism, Neuroticism, Feeling hurt, Feeling worry, Alanine aminotransferase levels in low alcohol consumption, Appendicular lean mass, Cortical surface area (visual PC2), Birth weight (MTAG), Birth length (MTAG), Monobrow, Intelligence, Worry, Lung function (FVC), Waist circumference adjusted for BMI (adjusted for smoking behaviour), Waist circumference adjusted for BMI (joint analysis main effects and smoking interaction), Waist circumference adjusted for BMI in non-smokers, 3-month functional outcome in ischaemic stroke (modified Rankin score), Cortical surface area, Depressive symptoms, Positive affect, Offspring birth weight, Lung function (FEV1/FVC), Well-being spectrum (multivariate analysis), White matter microstructure (fractional anisotropy), Type 2 diabetes, Life satisfaction, Macular thickness, Sensitivity to environmental stress and adversity, Cognitive performance, Cognitive performance (MTAG), Highest math class taken (MTAG), White blood cell count, Sunburns |

|    |           |           |           |          |                                                                                                       |                                               |                                                                                                                                                                                                                                                                                                                                                                                                                                                                                                                                                                          |                                                                                                                                                                                                                                                                                                                                                                                                                                   |
|----|-----------|-----------|-----------|----------|-------------------------------------------------------------------------------------------------------|-----------------------------------------------|--------------------------------------------------------------------------------------------------------------------------------------------------------------------------------------------------------------------------------------------------------------------------------------------------------------------------------------------------------------------------------------------------------------------------------------------------------------------------------------------------------------------------------------------------------------------------|-----------------------------------------------------------------------------------------------------------------------------------------------------------------------------------------------------------------------------------------------------------------------------------------------------------------------------------------------------------------------------------------------------------------------------------|
|    |           |           |           |          |                                                                                                       |                                               | circumference adjusted for BMI in non-smokers, 3-month functional outcome in ischaemic stroke (modified Rankin score), Cortical surface area, Depressive symptoms, Positive affect, Offspring birth weight, Lung function (FEV1/FVC), Well-being spectrum (multivariate analysis), White matter microstructure (fractional anisotropy), Type 2 diabetes, Life satisfaction, Macular thickness, Sensitivity to environmental stress and adversity, Cognitive performance, Cognitive performance (MTAG), Highest math class taken (MTAG), White blood cell count, Sunburns |                                                                                                                                                                                                                                                                                                                                                                                                                                   |
| 2  | 101127642 | 101528728 | 101328728 | 1.32E-07 | ENSG00000115539, ENSG00000170485                                                                      | PDCL3, NPAS2                                  | ENSG00000115539:                                                                                                                                                                                                                                                                                                                                                                                                                                                                                                                                                         | ENSG00000115539: ; ENSG00000170485: 3-hydroxy-1-methylpropylmercapturic acid levels in smokers, Facial morphology (factor 15, philtrum width), Intraocular pressure, Serum 25-Hydroxyvitamin D levels, Intraocular pressure and central corneal thickness (multi-trait analysis), Pulse pressure, Chronotype, Educational attainment (years of education), Educational attainment (MTAG), Waist-hip ratio, White blood cell count |
| 13 | 97953799  | 98367921  | 98153799  | 1.33E-07 | ENSG00000139793, ENSG00000125249                                                                      | MBNL2, RAP2A                                  | ENSG00000125249:                                                                                                                                                                                                                                                                                                                                                                                                                                                                                                                                                         | ENSG00000139793: Alcoholism (alcohol use disorder factor score), Alcoholism (alcohol dependence factor score), Energy expenditure (24h), Platelet reactivity in response to clopidogrel treatment, Diastolic blood pressure, Pre-treatment viral load in HIV-1 infection, Self-reported math ability, Self-reported math ability (MTAG), Highest math class taken (MTAG), Menarche (age at onset); ENSG00000125249:               |
| 19 | 54178627  | 54585820  | 54385437  | 1.43E-07 | ENSG00000142405, ENSG00000179820, ENSG00000126583, ENSG00000105605, ENSG00000142408, ENSG00000130433, | NLRP12, MYADM, PRKCG, CACNG7, CACNG8, CACNG6, | ENSG00000179820:                                                                                                                                                                                                                                                                                                                                                                                                                                                                                                                                                         | ENSG00000142405: Granulocyte percentage of myeloid white cells, Blood protein levels, Macrophage Migration Inhibitory Factor levels, Monocyte percentage of white cells, Monocyte count; ENSG00000179820: ; ENSG00000126583: ; ENSG00000105605: General cognitive ability, Educational attainment (MTAG), Cognitive performance (MTAG), Self-reported math ability, Self-reported math ability (MTAG),                            |

|   |          |          |          |          |                                                                                                                                                                                                     |                                                                                                                      |                                                                                                                                                                                                                                                                                                                                                                                 |                                                                                                                                                                                                                                                                                                                                                                                                                                                                                                                                                                                                                                                                                                                                                                                                                                                                                                                                                                                                                                                                                                                                                                                  |
|---|----------|----------|----------|----------|-----------------------------------------------------------------------------------------------------------------------------------------------------------------------------------------------------|----------------------------------------------------------------------------------------------------------------------|---------------------------------------------------------------------------------------------------------------------------------------------------------------------------------------------------------------------------------------------------------------------------------------------------------------------------------------------------------------------------------|----------------------------------------------------------------------------------------------------------------------------------------------------------------------------------------------------------------------------------------------------------------------------------------------------------------------------------------------------------------------------------------------------------------------------------------------------------------------------------------------------------------------------------------------------------------------------------------------------------------------------------------------------------------------------------------------------------------------------------------------------------------------------------------------------------------------------------------------------------------------------------------------------------------------------------------------------------------------------------------------------------------------------------------------------------------------------------------------------------------------------------------------------------------------------------|
|   |          |          |          |          | ENSG00000189068,<br>ENSG00000248385                                                                                                                                                                 | VSTM1,<br>TARM1                                                                                                      |                                                                                                                                                                                                                                                                                                                                                                                 | Highest math class taken (MTAG); ENSG00000142408; ;<br>ENSG00000130433; ; ENSG00000189068: Blood protein levels;<br>ENSG00000248385:                                                                                                                                                                                                                                                                                                                                                                                                                                                                                                                                                                                                                                                                                                                                                                                                                                                                                                                                                                                                                                             |
| 4 | 7809737  | 8218920  | 8016164  | 2.53E-07 | ENSG00000196526,<br>ENSG00000163995,<br>ENSG00000125089                                                                                                                                             | AFAP1,<br>ABLIM2,<br>SH3TC1                                                                                          | ENSG00000163995: Post<br>bronchodilator FEV1 in COPD,<br>Cognitive function,<br>Triacylglyceride levels, Early<br>onset periodontitis x smoking<br>status interaction, Irritable bowel<br>syndrome, Diffusing capacity of<br>carbon monoxide, Alcohol<br>consumption (drinks per week)<br>(MTAG), Response to cognitive-<br>behavioural therapy in major<br>depressive disorder | ENSG00000196526: Post bronchodilator FEV1/FVC ratio,<br>Intraocular pressure, Pulse pressure, Glaucoma (primary open-<br>angle), Glaucoma, Glaucoma (multi-trait analysis), Alanine<br>aminotransferase levels in excessive alcohol consumption, HDL<br>cholesterol levels x short total sleep time interaction (2df test),<br>Granulocyte-colony stimulating factor levels, Lung function<br>(FEV1/FVC), Diverticular disease, Mean platelet volume,<br>Platelet count, Medication use (antiglaucoma preparations<br>and miotics), Height, Systolic blood pressure;<br>ENSG00000163995: Post bronchodilator FEV1 in COPD,<br>Cognitive function, Triacylglyceride levels, Early onset<br>periodontitis x smoking status interaction, Irritable bowel<br>syndrome, Diffusing capacity of carbon monoxide, Alcohol<br>consumption (drinks per week) (MTAG), Response to<br>cognitive-behavioural therapy in major depressive disorder;<br>ENSG00000125089: Response to metformin (IC50), Idiopathic<br>downbeat nystagmus, Low density lipoprotein cholesterol<br>levels                                                                                                          |
| 4 | 76831352 | 77231352 | 77031352 | 3.04E-07 | ENSG00000138744,<br>ENSG00000198301,<br>ENSG00000138755,<br>ENSG00000156219,<br>ENSG00000169245,<br>ENSG00000169248,<br>ENSG00000138750,<br>ENSG00000138760,<br>ENSG00000189157,<br>ENSG00000118804 | NAAA,<br>SDAD1,<br>CXCL9,<br>ART3,<br>CXCL10,<br>CXCL11,<br>NUP54,<br><b>SCARB2</b> ,<br>FAM47E,<br>FAM47E-<br>STBD1 | ENSG00000138750: Deliberate<br>self-harm                                                                                                                                                                                                                                                                                                                                        | ENSG00000138744: Coronary artery calcified atherosclerotic<br>plaque (130 HU threshold) in type 2 diabetes, Blood protein<br>levels, Neurological blood protein biomarker levels;<br>ENSG00000198301: Longevity, Monokine induced by gamma<br>interferon levels, Hippocampal volume, Interferon gamma-<br>induced protein 10 levels; ENSG00000138755: Blood protein<br>levels; ENSG00000156219: Blood protein levels, C-X-C motif<br>chemokine 10 levels, Monokine induced by gamma interferon<br>levels, Hippocampal volume, Neonatal cytokine/chemokine<br>levels (fetal genetic effect), Type 2 diabetes, Body mass index,<br>Mean corpuscular hemoglobin; ENSG00000169245: Blood<br>protein levels, C-X-C motif chemokine 10 levels, Neonatal<br>cytokine/chemokine levels (fetal genetic effect);<br>ENSG00000169248: Blood protein levels; ENSG00000138750:<br>Deliberate self-harm; ENSG00000138760: Body mass index,<br>Parkinson's disease or first degree relation to individual with<br>Parkinson's disease, Body mass index (joint analysis main<br>effects and smoking interaction), BMI (adjusted for smoking<br>behaviour); ENSG00000189157: Parkinson's disease, |

|    |           |           |           |          |                                                   |                      |                                                                                                                                                                                                                                                                                                                                                                                                                                                                                                                                                                                                                                                                                                                                                                                                                                                 |                                                                                                                                                                                                                                                                                                                                                                                                                                                                                                                                                                                                                                                                                                                                                                                                                                                                                                                                                                                                                                                                                                                                                                                                                                                                                                                                                                                                                                                                                                                                                                                                                                                                                              |
|----|-----------|-----------|-----------|----------|---------------------------------------------------|----------------------|-------------------------------------------------------------------------------------------------------------------------------------------------------------------------------------------------------------------------------------------------------------------------------------------------------------------------------------------------------------------------------------------------------------------------------------------------------------------------------------------------------------------------------------------------------------------------------------------------------------------------------------------------------------------------------------------------------------------------------------------------------------------------------------------------------------------------------------------------|----------------------------------------------------------------------------------------------------------------------------------------------------------------------------------------------------------------------------------------------------------------------------------------------------------------------------------------------------------------------------------------------------------------------------------------------------------------------------------------------------------------------------------------------------------------------------------------------------------------------------------------------------------------------------------------------------------------------------------------------------------------------------------------------------------------------------------------------------------------------------------------------------------------------------------------------------------------------------------------------------------------------------------------------------------------------------------------------------------------------------------------------------------------------------------------------------------------------------------------------------------------------------------------------------------------------------------------------------------------------------------------------------------------------------------------------------------------------------------------------------------------------------------------------------------------------------------------------------------------------------------------------------------------------------------------------|
|    |           |           |           |          |                                                   |                      |                                                                                                                                                                                                                                                                                                                                                                                                                                                                                                                                                                                                                                                                                                                                                                                                                                                 | Parkinson's disease or first degree relation to individual with Parkinson's disease, HDL cholesterol levels x long total sleep time interaction (2df test), Platelet count, Mean corpuscular hemoglobin, Mean corpuscular volume, Blood protein levels; ENSG00000118804:                                                                                                                                                                                                                                                                                                                                                                                                                                                                                                                                                                                                                                                                                                                                                                                                                                                                                                                                                                                                                                                                                                                                                                                                                                                                                                                                                                                                                     |
| 3  | 167638903 | 168093774 | 167852482 | 4.62E-07 | ENSG00000173905                                   | GOLIM4               | ENSG00000173905: Response to metformin (IC50), Metabolite levels, Cerebrospinal fluid t-tau levels in Alzheimer's disease dementia, Self-reported math ability, Height, Self-reported math ability (MTAG)                                                                                                                                                                                                                                                                                                                                                                                                                                                                                                                                                                                                                                       | ENSG00000173905: Response to metformin (IC50), Metabolite levels, Cerebrospinal fluid t-tau levels in Alzheimer's disease dementia, Self-reported math ability, Height, Self-reported math ability (MTAG)                                                                                                                                                                                                                                                                                                                                                                                                                                                                                                                                                                                                                                                                                                                                                                                                                                                                                                                                                                                                                                                                                                                                                                                                                                                                                                                                                                                                                                                                                    |
| 5  | 85631480  | 86067680  | 85867680  | 4.80E-07 | ENSG00000127184                                   | COX7C                | ENSG00000127184:                                                                                                                                                                                                                                                                                                                                                                                                                                                                                                                                                                                                                                                                                                                                                                                                                                | ENSG00000127184:                                                                                                                                                                                                                                                                                                                                                                                                                                                                                                                                                                                                                                                                                                                                                                                                                                                                                                                                                                                                                                                                                                                                                                                                                                                                                                                                                                                                                                                                                                                                                                                                                                                                             |
| 15 | 28144238  | 28735266  | 28344238  | 5.46E-07 | ENSG00000104044, ENSG00000128731, ENSG00000153684 | OCA2, HERC2, GOLGA8F | ENSG00000128731: Black vs. blond hair color, Black vs. red hair color, Eye color, Vitiligo, Hair color, Tanning, Eye color traits, Blond vs. brown hair color, Blue vs. green eyes, Blue vs. brown eyes, Iris color, Multiple myeloma (IgH translocation), Alzheimer disease and age of onset, Squamous cell carcinoma, Skin colour saturation, Perceived skin darkness, Skin sensitivity to sun, Blond vs non-blond hair color, Brown vs. non-brown hair color, Light vs. dark hair color, Basal cell carcinoma, Osteoarthritis of the hip (with total joint replacement), Intraocular pressure, Skin pigmentation (conditioned on rs1426654 and rs35397), Skin pigmentation, Cutaneous melanoma or hair colour, Cutaneous malignant melanoma, Nevus count or cutaneous melanoma, Diisocyanate-induced asthma, Refractive astigmatism, Corneal | ENSG00000104044: Black vs. blond hair color, Black vs. red hair color, Eye color, Lung function (forced expiratory flow during mid-portion (25% and 75%) of forced vital capacity), Squamous cell carcinoma, Post bronchodilator FEV1/FVC ratio, Blond vs non-blond hair color, Brown vs. non-brown hair color, Light vs. dark hair color, Red vs non-red hair color, Facial morphology (factor 19), Uveal melanoma, Iris color (b* coordinate), Iris color (L* coordinate), Iris color (a* coordinate), Skin pigmentation (conditioned on rs1426654 and rs35397), Cataracts (operation), Cutaneous malignant melanoma, Central retinal vein equivalent, Central retinal arteriolar equivalent, Low tan response, Eye color (brightness), Eye color (hue), Skin, hair and eye pigmentation (multivariate analysis), Blond vs. brown/black hair color, Brown vs. black hair color, Cutaneous squamous cell carcinoma, Skin pigmentation, Eye color (saturation), Melanoma, Shingles, Eye color traits, Skin pigmentation traits, Macular thickness, Hair color, Sunburns; ENSG00000128731: Black vs. blond hair color, Black vs. red hair color, Eye color, Vitiligo, Hair color, Tanning, Eye color traits, Blond vs. brown hair color, Blue vs. green eyes, Blue vs. brown eyes, Iris color, Multiple myeloma (IgH translocation), Alzheimer disease and age of onset, Squamous cell carcinoma, Skin colour saturation, Perceived skin darkness, Skin sensitivity to sun, Blond vs non-blond hair color, Brown vs. non-brown hair color, Light vs. dark hair color, Basal cell carcinoma, Osteoarthritis of the hip (with total joint replacement), Intraocular pressure, Skin pigmentation |

|  |  |  |  |  |  |  |                                                                                                                                                                                                                                                                                                                                                                                                                                                                                                                                                                                            |                                                                                                                                                                                                                                                                                                                                                                                                                                                                                                                                                                                                                                                                                                                                                                                                                                          |
|--|--|--|--|--|--|--|--------------------------------------------------------------------------------------------------------------------------------------------------------------------------------------------------------------------------------------------------------------------------------------------------------------------------------------------------------------------------------------------------------------------------------------------------------------------------------------------------------------------------------------------------------------------------------------------|------------------------------------------------------------------------------------------------------------------------------------------------------------------------------------------------------------------------------------------------------------------------------------------------------------------------------------------------------------------------------------------------------------------------------------------------------------------------------------------------------------------------------------------------------------------------------------------------------------------------------------------------------------------------------------------------------------------------------------------------------------------------------------------------------------------------------------------|
|  |  |  |  |  |  |  | astigmatism, Bone mineral content, Low tan response, Rosacea symptom severity, Eye color (hue), Skin, hair and eye pigmentation (multivariate analysis), Brown vs. black hair color, Red vs. brown/black hair color, Blond vs. brown/black hair color, Eye color (saturation), Eye color (brightness), Monobrow, Colorectal cancer, Colonoscopy-negative controls vs population controls, Keratinocyte cancer (MTAG), Glaucoma, Iris color (b* coordinate), Iris heterochromicity, Iris color (L* coordinate), Type 2 diabetes, Skin pigmentation traits, Hair morphology traits, Sunburns | (conditioned on rs1426654 and rs35397), Skin pigmentation, Cutaneous melanoma or hair colour, Cutaneous malignant melanoma, Nevus count or cutaneous melanoma, Diisocyanate-induced asthma, Refractive astigmatism, Corneal astigmatism, Bone mineral content, Low tan response, Rosacea symptom severity, Eye color (hue), Skin, hair and eye pigmentation (multivariate analysis), Brown vs. black hair color, Red vs. brown/black hair color, Blond vs. brown/black hair color, Eye color (saturation), Eye color (brightness), Monobrow, Colorectal cancer, Colonoscopy-negative controls vs population controls, Keratinocyte cancer (MTAG), Glaucoma, Iris color (b* coordinate), Iris heterochromicity, Iris color (L* coordinate), Type 2 diabetes, Skin pigmentation traits, Hair morphology traits, Sunburns; ENSG00000153684: |
|--|--|--|--|--|--|--|--------------------------------------------------------------------------------------------------------------------------------------------------------------------------------------------------------------------------------------------------------------------------------------------------------------------------------------------------------------------------------------------------------------------------------------------------------------------------------------------------------------------------------------------------------------------------------------------|------------------------------------------------------------------------------------------------------------------------------------------------------------------------------------------------------------------------------------------------------------------------------------------------------------------------------------------------------------------------------------------------------------------------------------------------------------------------------------------------------------------------------------------------------------------------------------------------------------------------------------------------------------------------------------------------------------------------------------------------------------------------------------------------------------------------------------------|

4604

4605 **Table S4d.2.** Top 25 regions from west-eurasia scan.

4606

4607

| chr | start     | end       | bestpos   | minpvalue | ensembl                                                                             | hgnc                                | disease_trait_best                                                                                                                                                                                                                                                                                                                                                                                                                                                                                                | disease_trait                                                                                                                                                                                                                                                                                                                                                                                                                                                                                                     |
|-----|-----------|-----------|-----------|-----------|-------------------------------------------------------------------------------------|-------------------------------------|-------------------------------------------------------------------------------------------------------------------------------------------------------------------------------------------------------------------------------------------------------------------------------------------------------------------------------------------------------------------------------------------------------------------------------------------------------------------------------------------------------------------|-------------------------------------------------------------------------------------------------------------------------------------------------------------------------------------------------------------------------------------------------------------------------------------------------------------------------------------------------------------------------------------------------------------------------------------------------------------------------------------------------------------------|
| 15  | 48233494  | 48633494  | 48433494  | 2.02E-31  | ENSG00000188467, ENSG00000104177, ENSG00000233932, ENSG00000074803, ENSG00000128951 | SLC24A5, MYEF2, CTXN2, SLC12A1, DUT | ENSG00000188467: Hair color, Skin pigmentation, Body mass index, Skin, hair and eye pigmentation (multivariate analysis), Eye color, Eye color (brightness), Eye color (saturation), Iris color (a* coordinate), Skin reflectance (Melanin index), Iris color (b* coordinate); ENSG00000104177: Skin pigmentation, Hair color; ENSG00000233932: ; ENSG00000074803: Systemic lupus erythematosus, Longevity, Skin reflectance (Melanin index), Lymphocyte counts; ENSG00000128951: Protein quantitative trait loci | ENSG00000188467: Hair color, Skin pigmentation, Body mass index, Skin, hair and eye pigmentation (multivariate analysis), Eye color, Eye color (brightness), Eye color (saturation), Iris color (a* coordinate), Skin reflectance (Melanin index), Iris color (b* coordinate); ENSG00000104177: Skin pigmentation, Hair color; ENSG00000233932: ; ENSG00000074803: Systemic lupus erythematosus, Longevity, Skin reflectance (Melanin index), Lymphocyte counts; ENSG00000128951: Protein quantitative trait loci |
| 6   | 134192815 | 134829070 | 134392815 | 4.09E-26  | ENSG00000118526, ENSG00000028839, ENSG00000146411, ENSG00000118515                  | TCF21, TBPL1, SLC2A12, SGK1         | ENSG00000146411: Coronary artery disease, High chromosomal aberration frequency (chromosome type), FEV1, Lung function (FVC)                                                                                                                                                                                                                                                                                                                                                                                      | ENSG00000118526: Coronary heart disease, Coronary artery disease or ischemic stroke, Coronary artery disease, Coronary artery disease or large artery stroke, PR interval, Medication use (diuretics), Lung function (FEV1/FVC); ENSG00000028839: Mean corpuscular hemoglobin; ENSG00000146411: Coronary artery disease, High chromosomal aberration frequency (chromosome type), FEV1, Lung function (FVC);                                                                                                      |

|    |          |          |          |          |                                                                                                                                                                                                                                                                                                                                                                     |                                                                                                                                                                  |                  |                                                                                                                                                                                                                                                                                                                                                                                                                                                                                                                                                                                                                                                                                                                                                                                                                                                                                                                                                                                                                                                                                                                                                                                                                                                                                                                                                                                                                                                                                                                                                                                                                                                                                                                                                                                                                                                                                                                                                                                                                                                                                                                                                                                                                                                                                                                                                                                                                                                                                           |
|----|----------|----------|----------|----------|---------------------------------------------------------------------------------------------------------------------------------------------------------------------------------------------------------------------------------------------------------------------------------------------------------------------------------------------------------------------|------------------------------------------------------------------------------------------------------------------------------------------------------------------|------------------|-------------------------------------------------------------------------------------------------------------------------------------------------------------------------------------------------------------------------------------------------------------------------------------------------------------------------------------------------------------------------------------------------------------------------------------------------------------------------------------------------------------------------------------------------------------------------------------------------------------------------------------------------------------------------------------------------------------------------------------------------------------------------------------------------------------------------------------------------------------------------------------------------------------------------------------------------------------------------------------------------------------------------------------------------------------------------------------------------------------------------------------------------------------------------------------------------------------------------------------------------------------------------------------------------------------------------------------------------------------------------------------------------------------------------------------------------------------------------------------------------------------------------------------------------------------------------------------------------------------------------------------------------------------------------------------------------------------------------------------------------------------------------------------------------------------------------------------------------------------------------------------------------------------------------------------------------------------------------------------------------------------------------------------------------------------------------------------------------------------------------------------------------------------------------------------------------------------------------------------------------------------------------------------------------------------------------------------------------------------------------------------------------------------------------------------------------------------------------------------------|
|    |          |          |          |          |                                                                                                                                                                                                                                                                                                                                                                     |                                                                                                                                                                  |                  | ENSG00000118515: Immune reponse to smallpox (secreted IFN-alpha), Alzheimer disease and age of onset, Pelvic organ prolapse, Pelvic organ prolapse (moderate/severe), Blond vs. brown/black hair color, Schizophrenia (inflammation and infection response interaction), Body mass index (smoking years interaction), Metabolite levels, Adolescent idiopathic scoliosis, Hair color                                                                                                                                                                                                                                                                                                                                                                                                                                                                                                                                                                                                                                                                                                                                                                                                                                                                                                                                                                                                                                                                                                                                                                                                                                                                                                                                                                                                                                                                                                                                                                                                                                                                                                                                                                                                                                                                                                                                                                                                                                                                                                      |
| 11 | 61264124 | 62263869 | 61770303 | 8.70E-22 | ENSG00000204950, ENSG00000011347, ENSG00000134780, ENSG00000124920, ENSG00000134825, ENSG00000168496, ENSG00000134824, ENSG00000149485, ENSG00000221968, ENSG00000167994, ENSG00000167995, ENSG00000167996, ENSG00000149503, ENSG00000168515, ENSG00000124939, ENSG00000124935, ENSG00000110484, ENSG00000197745, ENSG00000162174, ENSG00000149021, ENSG00000124942 | LRR10B, SYT7, DAGLA, MYRF, TMEM258, FEN1, FADS2, FADS1, FADS3, RAB31L1, BEST1, FTH1, INCENP, SCGB1D1, SCGB2A1, SCGB1D2, SCGB2A2, SCGB1D4, ASRGL1, SCGB1A1, AHNAK | ENSG00000167996: | ENSG00000204950: Diastolic blood pressure, Systolic blood pressure, Systolic blood pressure (cigarette smoking interaction), Diastolic blood pressure (cigarette smoking interaction), Mean arterial pressure, Mean arterial pressure x alcohol consumption interaction (2df test), Diastolic blood pressure x alcohol consumption interaction (2df test), Hypertension, Medication use (agents acting on the renin-angiotensin system), Heel bone mineral density; ENSG0000011347: Intelligence (MTAG), Phosphatidylcholine levels, Cholesteryl ester levels, Educational attainment (years of education), Cognitive performance (MTAG), Cognitive performance; ENSG00000134780: Immune reponse to smallpox (secreted IL-2), Plasma omega-3 polyunsaturated fatty acid levels (docosapentaenoic acid), Plasma omega-6 polyunsaturated fatty acid levels (linoleic acid), 3-hydroxypropylmercapturic acid levels in smokers, Refractive error, Cerebrospinal fluid sTREM-2 levels, Spherical equivalent, C-reactive protein levels, Neuroticism, Positive affect, Depressive symptoms, Well-being spectrum (multivariate analysis), Life satisfaction, Depression, Lung function (FVC); ENSG00000124920: Plasma omega-3 polyunsaturated fatty acid levels (docosapentaenoic acid), Plasma omega-3 polyunsaturated fatty acid levels (alpha-linolenic acid), Plasma omega-3 polyunsaturated fatty acid level (eicosapentaenoic acid), Metabolite levels, Crohn's disease, Plasma omega-6 polyunsaturated fatty acid levels (gamma-linolenic acid), Plasma omega-6 polyunsaturated fatty acid levels (dihomo-gamma-linolenic acid), Plasma omega-6 polyunsaturated fatty acid levels (arachidonic acid), Hematocrit, Triglycerides, HDL cholesterol, Glycerophospholipid levels, Total cholesterol levels, Moyamoya disease, Resting heart rate, Red blood cell count, Serum total protein level, Serum metabolite concentrations in chronic kidney disease, Serum metabolite ratios in chronic kidney disease, Triglyceride levels x long total sleep time interaction (2df test), Serum metabolite levels (CMS), Heel bone mineral density, Hemoglobin levels, Spherical equivalent, Blood metabolite levels, Colorectal cancer, Serum omega-3 polyunsaturated fatty acid concentration in metabolic syndrome, Low density lipoprotein cholesterol levels, Serum metabolite levels, Chronic inflammatory diseases (ankylosing spondylitis, Crohn's disease, psoriasis, primary sclerosing |



|  |  |  |  |  |  |  |  |                                                                                                                                                                                                                                                                                                                                                                                                                                                                                                                                                                                                                                                                                                                                                                                                                                                                                                                                                                                                                                                                                                                                                                                                                                                                                                                                                                                                                                                                                                                                                                                                                                                                                                                                                                                                                                                                                                                                                                                                                                                                                                                                                                                                                                                                                                                                                                                                                                                                                                                                                                                                                                                                                                                                                                                                                                                                                                                                                                                                                                                                    |
|--|--|--|--|--|--|--|--|--------------------------------------------------------------------------------------------------------------------------------------------------------------------------------------------------------------------------------------------------------------------------------------------------------------------------------------------------------------------------------------------------------------------------------------------------------------------------------------------------------------------------------------------------------------------------------------------------------------------------------------------------------------------------------------------------------------------------------------------------------------------------------------------------------------------------------------------------------------------------------------------------------------------------------------------------------------------------------------------------------------------------------------------------------------------------------------------------------------------------------------------------------------------------------------------------------------------------------------------------------------------------------------------------------------------------------------------------------------------------------------------------------------------------------------------------------------------------------------------------------------------------------------------------------------------------------------------------------------------------------------------------------------------------------------------------------------------------------------------------------------------------------------------------------------------------------------------------------------------------------------------------------------------------------------------------------------------------------------------------------------------------------------------------------------------------------------------------------------------------------------------------------------------------------------------------------------------------------------------------------------------------------------------------------------------------------------------------------------------------------------------------------------------------------------------------------------------------------------------------------------------------------------------------------------------------------------------------------------------------------------------------------------------------------------------------------------------------------------------------------------------------------------------------------------------------------------------------------------------------------------------------------------------------------------------------------------------------------------------------------------------------------------------------------------------|
|  |  |  |  |  |  |  |  | <p> cholangitis, ulcerative colitis) (pleiotropy), Hemoglobin concentration, Vaccenic acid (18:1n-7) levels, Gondoic acid (20:1n-9) levels, LDL cholesterol levels, Iron status biomarkers (total iron binding capacity), Trans fatty acid levels, High density lipoprotein cholesterol levels, Red blood cell fatty acid levels, Colorectal cancer or advanced adenoma, Phosphatidylcholine-ether levels, Phosphatidylethanolamine-ether levels, Asthma (adult onset), Asthma, Nasal polyps, Systolic blood pressure, Triglyceride levels, Glycemic traits (pleiotropy), Educational attainment (years of education), Respiratory diseases; ENSG00000134825: Crohn's disease, Metabolic syndrome, Palmitoleic acid (16:1n-7) levels, Stearic acid (18:0) levels, Oleic acid (18:1n-9) levels, Phospholipid levels (plasma), Plasma omega-3 polyunsaturated fatty acid levels (docosapentaenoic acid), Plasma omega-3 polyunsaturated fatty acid level (eicosapentaenoic acid), Plasma omega-3 polyunsaturated fatty acid levels (alpha-linolenic acid), Metabolite levels, Plasma omega-6 polyunsaturated fatty acid levels (gamma-linolenic acid), Plasma omega-6 polyunsaturated fatty acid levels (dihomo-gamma-linolenic acid), Plasma omega-6 polyunsaturated fatty acid levels (arachidonic acid), Hematocrit, Triglycerides, HDL cholesterol, Glycerophospholipid levels, Total cholesterol levels, Resting heart rate, Red blood cell count, Serum total protein level, Irritable mood, Serum metabolite concentrations in chronic kidney disease, Serum metabolite ratios in chronic kidney disease, LDL cholesterol levels x short total sleep time interaction (2df test), Triglyceride levels x long total sleep time interaction (2df test), Serum metabolite levels (CMS), Heel bone mineral density, Hemoglobin levels, Spherical equivalent, Blood metabolite levels, Colorectal cancer, Serum omega-3 polyunsaturated fatty acid concentration in metabolic syndrome, Serum metabolite levels, Blond vs. brown/black hair color, Low density lipoprotein cholesterol levels, Bipolar disorder or major depressive disorder, Chronic inflammatory diseases (ankylosing spondylitis, Crohn's disease, psoriasis, primary sclerosing cholangitis, ulcerative colitis) (pleiotropy), Hemoglobin concentration, Vaccenic acid (18:1n-7) levels, Gondoic acid (20:1n-9) levels, LDL cholesterol levels, Iron status biomarkers (total iron binding capacity), Trans fatty acid levels, High density lipoprotein cholesterol levels, Carboplatin disposition in epithelial ovarian cancer, Red blood cell fatty acid levels, Colorectal cancer or advanced adenoma, Phosphatidylcholine-ether levels, Phosphatidylcholine levels, Phosphatidylethanolamine-ether levels, Cholesteryl ester levels, Asthma (adult onset), Asthma, Nasal polyps, Triglyceride levels, Glycemic traits (pleiotropy), Educational attainment (years of education), Respiratory diseases, Hair color; ENSG00000168496: Plasma omega-3 polyunsaturated fatty acid levels </p> |
|--|--|--|--|--|--|--|--|--------------------------------------------------------------------------------------------------------------------------------------------------------------------------------------------------------------------------------------------------------------------------------------------------------------------------------------------------------------------------------------------------------------------------------------------------------------------------------------------------------------------------------------------------------------------------------------------------------------------------------------------------------------------------------------------------------------------------------------------------------------------------------------------------------------------------------------------------------------------------------------------------------------------------------------------------------------------------------------------------------------------------------------------------------------------------------------------------------------------------------------------------------------------------------------------------------------------------------------------------------------------------------------------------------------------------------------------------------------------------------------------------------------------------------------------------------------------------------------------------------------------------------------------------------------------------------------------------------------------------------------------------------------------------------------------------------------------------------------------------------------------------------------------------------------------------------------------------------------------------------------------------------------------------------------------------------------------------------------------------------------------------------------------------------------------------------------------------------------------------------------------------------------------------------------------------------------------------------------------------------------------------------------------------------------------------------------------------------------------------------------------------------------------------------------------------------------------------------------------------------------------------------------------------------------------------------------------------------------------------------------------------------------------------------------------------------------------------------------------------------------------------------------------------------------------------------------------------------------------------------------------------------------------------------------------------------------------------------------------------------------------------------------------------------------------|





|  |  |  |  |  |  |  |  |                                                                                                                                                                                                                                                                                                                                                                                                                                                                                                                                                                                                                                                                                                                                                                                                                                                                                                                                                                                                                                                                                                                                                                                                                                                                                                                                                                                                                                                                                                                                                                                                                                                                                                                                                                                                                                                                                                                                                                                                                                                                                                                                                                                                                                                                                                                                                                                                                                                                                                                                                                                                                                                                                                                                                                                                                                                                                                                                                                                                                                     |
|--|--|--|--|--|--|--|--|-------------------------------------------------------------------------------------------------------------------------------------------------------------------------------------------------------------------------------------------------------------------------------------------------------------------------------------------------------------------------------------------------------------------------------------------------------------------------------------------------------------------------------------------------------------------------------------------------------------------------------------------------------------------------------------------------------------------------------------------------------------------------------------------------------------------------------------------------------------------------------------------------------------------------------------------------------------------------------------------------------------------------------------------------------------------------------------------------------------------------------------------------------------------------------------------------------------------------------------------------------------------------------------------------------------------------------------------------------------------------------------------------------------------------------------------------------------------------------------------------------------------------------------------------------------------------------------------------------------------------------------------------------------------------------------------------------------------------------------------------------------------------------------------------------------------------------------------------------------------------------------------------------------------------------------------------------------------------------------------------------------------------------------------------------------------------------------------------------------------------------------------------------------------------------------------------------------------------------------------------------------------------------------------------------------------------------------------------------------------------------------------------------------------------------------------------------------------------------------------------------------------------------------------------------------------------------------------------------------------------------------------------------------------------------------------------------------------------------------------------------------------------------------------------------------------------------------------------------------------------------------------------------------------------------------------------------------------------------------------------------------------------------------|
|  |  |  |  |  |  |  |  | <p>Gallstone disease, anorexia nervosa, attention-deficit/hyperactivity disorder, autism spectrum disorder, bipolar disorder, major depression, obsessive-compulsive disorder, schizophrenia, or Tourette syndrome (pleiotropy), QT dynamics during exercise, Balding type 1, Hypothyroidism; ENSG00000149485: HDL cholesterol, Triglycerides, Fasting blood glucose, Homeostasis model assessment of beta-cell function, LDL cholesterol, Heart rate, Metabolic syndrome, Resting heart rate, Lipid metabolism phenotypes, Hematology traits, Comprehensive strength and appendicular lean mass, Metabolite levels, Cholesterol, total, Metabolic traits, Plasma omega-3 polyunsaturated fatty acid levels (alpha-linolenic acid), Plasma omega-3 polyunsaturated fatty acid level (eicosapentaenoic acid), Plasma omega-3 polyunsaturated fatty acid levels (docosapentaenoic acid), Fasting blood glucose (BMI interaction), Plasma omega-6 polyunsaturated fatty acid levels (gamma-linolenic acid), Plasma omega-6 polyunsaturated fatty acid levels (dihomo-gamma-linolenic acid), Delta-6 desaturase activity, Plasma omega-6 polyunsaturated fatty acid levels (linoleic acid), Eosinophil counts, Platelet count, C-reactive protein levels or HDL-cholesterol levels (pleiotropy), C-reactive protein levels or triglyceride levels (pleiotropy), Metabolite levels (lipid measures), Granulocyte percentage of myeloid white cells, Monocyte percentage of white cells, Glycerophospholipid levels, Sphingolipid levels, Vitiligo, Total cholesterol levels, Alanine transaminase levels, Triglyceride levels, Breast milk fatty acid composition (maternal genotype effect), Breast milk fatty acid composition (infant genotype effect), Serum metabolite concentrations in chronic kidney disease, Serum metabolite ratios in chronic kidney disease, Low density lipoprotein cholesterol levels, Apolipoprotein B levels, Pulse pressure, LDL cholesterol levels, LDL cholesterol levels x long total sleep time interaction (2df test), HDL cholesterol levels, Triglyceride levels x short total sleep time interaction (2df test), Serum metabolite levels (CMS), HDL cholesterol levels x long total sleep time interaction (2df test), HDL cholesterol levels x short total sleep time interaction (2df test), HDL cholesterol levels x alcohol consumption (regular vs non-regular drinkers) interaction (2df), Triglyceride levels x alcohol consumption (regular vs non-regular drinkers) interaction (2df), Bipolar I disorder, Apolipoprotein A1 levels, Age-related disease endophenotypes, Red cell distribution width, Height, Blood metabolite levels, Blood metabolite ratios, Rheumatoid arthritis, Serum metabolite levels, Change in serum metabolite levels (CMS), Serum omega-3 polyunsaturated fatty acid concentration in metabolic syndrome, Serum omega-6 to omega-3 polyunsaturated fatty acid ratio in metabolic syndrome, Serum docosahexaenoic fatty acid concentration in metabolic</p> |
|--|--|--|--|--|--|--|--|-------------------------------------------------------------------------------------------------------------------------------------------------------------------------------------------------------------------------------------------------------------------------------------------------------------------------------------------------------------------------------------------------------------------------------------------------------------------------------------------------------------------------------------------------------------------------------------------------------------------------------------------------------------------------------------------------------------------------------------------------------------------------------------------------------------------------------------------------------------------------------------------------------------------------------------------------------------------------------------------------------------------------------------------------------------------------------------------------------------------------------------------------------------------------------------------------------------------------------------------------------------------------------------------------------------------------------------------------------------------------------------------------------------------------------------------------------------------------------------------------------------------------------------------------------------------------------------------------------------------------------------------------------------------------------------------------------------------------------------------------------------------------------------------------------------------------------------------------------------------------------------------------------------------------------------------------------------------------------------------------------------------------------------------------------------------------------------------------------------------------------------------------------------------------------------------------------------------------------------------------------------------------------------------------------------------------------------------------------------------------------------------------------------------------------------------------------------------------------------------------------------------------------------------------------------------------------------------------------------------------------------------------------------------------------------------------------------------------------------------------------------------------------------------------------------------------------------------------------------------------------------------------------------------------------------------------------------------------------------------------------------------------------------|

|  |  |  |  |  |  |  |  |                                                                                                                                                                                                                                                                                                                                                                                                                                                                                                                                                                                                                                                                                                                                                                                                                                                                                                                                                                                                                                                                                                                                                                                                                                                                                                                                                                                                                                                                                                                                                                                                                                                                                                                                                                                                                                                                                                                                                                                                                                                                                                                                                                                                                                                                                                                                                                                                                                                                                                                                                                                                                                                                                                                                                                                                                                                                                                                                                                                                                |
|--|--|--|--|--|--|--|--|----------------------------------------------------------------------------------------------------------------------------------------------------------------------------------------------------------------------------------------------------------------------------------------------------------------------------------------------------------------------------------------------------------------------------------------------------------------------------------------------------------------------------------------------------------------------------------------------------------------------------------------------------------------------------------------------------------------------------------------------------------------------------------------------------------------------------------------------------------------------------------------------------------------------------------------------------------------------------------------------------------------------------------------------------------------------------------------------------------------------------------------------------------------------------------------------------------------------------------------------------------------------------------------------------------------------------------------------------------------------------------------------------------------------------------------------------------------------------------------------------------------------------------------------------------------------------------------------------------------------------------------------------------------------------------------------------------------------------------------------------------------------------------------------------------------------------------------------------------------------------------------------------------------------------------------------------------------------------------------------------------------------------------------------------------------------------------------------------------------------------------------------------------------------------------------------------------------------------------------------------------------------------------------------------------------------------------------------------------------------------------------------------------------------------------------------------------------------------------------------------------------------------------------------------------------------------------------------------------------------------------------------------------------------------------------------------------------------------------------------------------------------------------------------------------------------------------------------------------------------------------------------------------------------------------------------------------------------------------------------------------------|
|  |  |  |  |  |  |  |  | <p>syndrome, Delta-5 desaturase activity response to n3-polyunsaturated fat supplement, Change in serum metabolite levels, LDL cholesterol x physical activity interaction (2df test), High density lipoprotein cholesterol levels, Asthma, Bipolar disorder, Osteoporosis-related phenotypes (MTAG), Granulocyte count, Age-related diseases, mortality and associated endophenotypes, Sum neutrophil eosinophil counts, Sum eosinophil basophil counts, Myeloid white cell count, White blood cell count, Mean platelet volume, Trans fatty acid levels, Red blood cell fatty acid levels, Plasma omega-6 polyunsaturated fatty acid levels (arachidonic acid), Plasma omega-6 polyunsaturated fatty acid levels (adrenic acid), Laryngeal squamous cell carcinoma, Triacylglycerol 56:6 levels, Metabolite risk score for predicting weight gain, Fatty acid desaturase activity (serum), Fatty acid desaturase activity (adipose tissue), Phosphatidylcholine-ether levels, Lysophosphatidylethanolamine levels, Phosphatidylcholine levels, Phosphatidylethanolamine-ether levels, Phosphatidylinositol levels, Cholesteryl ester levels, Sphingomyelin levels, Lysophosphatidylcholine levels, Triacylglyceride levels, HDL cholesterol levels in current drinkers, LDL cholesterol levels in current drinkers, Triglyceride levels in current drinkers, HDL cholesterol levels x alcohol consumption (drinkers vs non-drinkers) interaction (2df), Triglyceride levels x alcohol consumption (drinkers vs non-drinkers) interaction (2df), LDL cholesterol levels x alcohol consumption (drinkers vs non-drinkers) interaction (2df), LDL cholesterol levels x alcohol consumption (regular vs non-regular drinkers) interaction (2df), Red blood cell count, QT interval, Aortic valve stenosis, Sleep duration, Neutrophil count, Total triglycerides levels, Mean corpuscular hemoglobin concentration, Mean corpuscular volume, IgA levels, Gallstone disease; ENSG00000221968: Sphingolipid levels, Metabolite levels, Phosphatidylcholine levels, Cholesteryl ester levels, Sphingolipid d18:1/d18:2 ratio, Urate levels; ENSG00000167994: Sphingolipid levels, Metabolite levels, Schizophrenia, Mean corpuscular hemoglobin; ENSG00000167995: Plasma omega-3 polyunsaturated fatty acid level (eicosapentaenoic acid), Metabolite levels; ENSG00000167996: ; ENSG00000149503: Prostate cancer, Breast cancer; ENSG00000168515: ; ENSG00000124939: ; ENSG00000124935: ; ENSG00000110484: ; ENSG00000197745: ; ENSG00000162174: 3-hydroxypropylmercapturic acid levels in smokers, Trunk fat mass, Body fat mass; ENSG00000149021: Waist-to-hip ratio adjusted for BMI, Waist-hip ratio; ENSG00000124942: Alzheimer disease and age of onset, Heel bone mineral density, Alzheimer's disease (late onset), HDL cholesterol levels, Cutaneous melanoma or hair colour, Waist-to-hip ratio adjusted for BMI, Blond vs. brown/black hair color, C-reactive protein levels, Lung function (FEV1),</p> |
|--|--|--|--|--|--|--|--|----------------------------------------------------------------------------------------------------------------------------------------------------------------------------------------------------------------------------------------------------------------------------------------------------------------------------------------------------------------------------------------------------------------------------------------------------------------------------------------------------------------------------------------------------------------------------------------------------------------------------------------------------------------------------------------------------------------------------------------------------------------------------------------------------------------------------------------------------------------------------------------------------------------------------------------------------------------------------------------------------------------------------------------------------------------------------------------------------------------------------------------------------------------------------------------------------------------------------------------------------------------------------------------------------------------------------------------------------------------------------------------------------------------------------------------------------------------------------------------------------------------------------------------------------------------------------------------------------------------------------------------------------------------------------------------------------------------------------------------------------------------------------------------------------------------------------------------------------------------------------------------------------------------------------------------------------------------------------------------------------------------------------------------------------------------------------------------------------------------------------------------------------------------------------------------------------------------------------------------------------------------------------------------------------------------------------------------------------------------------------------------------------------------------------------------------------------------------------------------------------------------------------------------------------------------------------------------------------------------------------------------------------------------------------------------------------------------------------------------------------------------------------------------------------------------------------------------------------------------------------------------------------------------------------------------------------------------------------------------------------------------|

|    |          |          |          |          |                                                                                                                                                                                                                                                                                                                  |                                                                                                                                                  |                                                                                                                                                                                                                                                                      |                                                                                                                                                                                                                                                                                                                                                                                                                                                                                                                                                                                                                                                                                                                                                                                                                                                                                                                                                                                                                                                                                                                                                                                                                                                                                                                  |
|----|----------|----------|----------|----------|------------------------------------------------------------------------------------------------------------------------------------------------------------------------------------------------------------------------------------------------------------------------------------------------------------------|--------------------------------------------------------------------------------------------------------------------------------------------------|----------------------------------------------------------------------------------------------------------------------------------------------------------------------------------------------------------------------------------------------------------------------|------------------------------------------------------------------------------------------------------------------------------------------------------------------------------------------------------------------------------------------------------------------------------------------------------------------------------------------------------------------------------------------------------------------------------------------------------------------------------------------------------------------------------------------------------------------------------------------------------------------------------------------------------------------------------------------------------------------------------------------------------------------------------------------------------------------------------------------------------------------------------------------------------------------------------------------------------------------------------------------------------------------------------------------------------------------------------------------------------------------------------------------------------------------------------------------------------------------------------------------------------------------------------------------------------------------|
|    |          |          |          |          |                                                                                                                                                                                                                                                                                                                  |                                                                                                                                                  |                                                                                                                                                                                                                                                                      | Waist-hip ratio, Waist circumference adjusted for body mass index, Hair color                                                                                                                                                                                                                                                                                                                                                                                                                                                                                                                                                                                                                                                                                                                                                                                                                                                                                                                                                                                                                                                                                                                                                                                                                                    |
| 17 | 79055998 | 79469799 | 79255998 | 1.91E-20 | ENSG00000175866, ENSG00000181409, ENSG00000141577, ENSG00000167302, ENSG00000224877, ENSG00000157637, ENSG00000185332                                                                                                                                                                                            | BAIAP2, AATK, AZI1, ENTHD2, C17orf89, SLC38A10, TMEM105                                                                                          | ENSG00000157637: Longevity, IgG glycosylation, Serum 25-Hydroxyvitamin D levels, Menarche (age at onset)                                                                                                                                                             | ENSG00000175866: Serum uric acid levels in response to allopurinol in gout, Neuroticism, Neuroticism, Feeling tense, Fat-free mass, Memory performance, Depression, Worry, Depressed affect, Body mass index, General factor of neuroticism, Positive affect, Well-being spectrum (multivariate analysis), Breast cancer, Depressive symptoms (MTAG), Depressive symptoms, General cognitive ability, Sensitivity to environmental stress and adversity, Cognitive performance (MTAG), Self-reported math ability, Self-reported math ability (MTAG); ENSG00000181409: Obesity-related traits, Neuroticism, Feeling tense, Beef consumption, Fat-free mass, Worry, Neuroticism, Body mass index, Depressive symptoms, Neutrophil count, Life satisfaction, Sensitivity to environmental stress and adversity, Height, Systolic blood pressure; ENSG00000141577: IgG glycosylation, Frontotemporal dementia, IgG galactosylation phenotypes (multivariate analysis), IgG N-glycosylation phenotypes (multivariate analysis), Red blood cell count; ENSG00000167302: Blood protein levels; ENSG00000224877: IgG fucosylation phenotypes (multivariate analysis); ENSG00000157637: Longevity, IgG glycosylation, Serum 25-Hydroxyvitamin D levels, Menarche (age at onset); ENSG00000185332: Intake of total sugars |
| 11 | 60562850 | 61159993 | 60762850 | 4.62E-19 | ENSG00000172689, ENSG00000110104, ENSG00000183134, ENSG00000149506, ENSG00000110107, ENSG00000110108, ENSG00000006118, ENSG00000110446, ENSG0000013725, ENSG00000110448, ENSG00000167987, ENSG00000229859, ENSG00000229183, ENSG00000256713, ENSG00000167992, ENSG00000167986, ENSG00000149476, ENSG00000162144, | MS4A10, CCDC86, PTGDR2, ZP1, PRPF19, TMEM109, TMEM132A, SLC15A3, CD6, CD5, VPS37C, PGA3, PGA4, PGA5, VWCE, DDB1, DAK, CYB561A3, TMEM138, TMEM216 | ENSG0000013725: Multiple sclerosis, Inflammatory bowel disease, Crohn's disease, Ulcerative colitis, Chronic inflammatory diseases (ankylosing spondylitis, Crohn's disease, psoriasis, primary sclerosing cholangitis, ulcerative colitis) (pleiotropy), CD6 levels | ENSG00000172689: ; ENSG00000110104: ; ENSG00000183134: ; ENSG00000149506: Response to ziprazidone in schizophrenia; ENSG00000110107: ; ENSG00000110108: Blood protein levels; ENSG00000006118: Blood protein levels; ENSG00000110446: ; ENSG0000013725: Multiple sclerosis, Inflammatory bowel disease, Crohn's disease, Ulcerative colitis, Chronic inflammatory diseases (ankylosing spondylitis, Crohn's disease, psoriasis, primary sclerosing cholangitis, ulcerative colitis) (pleiotropy), CD6 levels; ENSG00000110448: ; ENSG00000167987: Rheumatoid arthritis (ACPA-positive), Rheumatoid arthritis, Adolescent idiopathic scoliosis, Periventricular white matter hyperintensities; ENSG00000229859: ; ENSG00000229183: ; ENSG00000256713: Height; ENSG00000167992: ; ENSG00000167986: ; ENSG00000149476: ; ENSG00000162144: ; ENSG00000149483: ; ENSG00000187049:                                                                                                                                                                                                                                                                                                                                                                                                                                     |

|   |           |           |           |          |                                                                                                                                                             |                                                                             |                                                                                                                                                                                                                                                                                                                                                                                                                                                                                                                                                                                                                                                                                                                                                                                                                                                                                                                                                                                                                                                                                                                                                                                                    |                                                                                                                                                                                                                                                                                                                                                                                                                                                                                                                                                                                                                                                                                                                                                                                                                                                                                                                                                                                                                                                                                                                                                                                                                                                                                                                                                                                                                                                                                                                                                                                                                                                                                                                                                                                                                                                                                                                                                                                                                                                                                                                                                                                                                                                                                                                                                                                                                               |
|---|-----------|-----------|-----------|----------|-------------------------------------------------------------------------------------------------------------------------------------------------------------|-----------------------------------------------------------------------------|----------------------------------------------------------------------------------------------------------------------------------------------------------------------------------------------------------------------------------------------------------------------------------------------------------------------------------------------------------------------------------------------------------------------------------------------------------------------------------------------------------------------------------------------------------------------------------------------------------------------------------------------------------------------------------------------------------------------------------------------------------------------------------------------------------------------------------------------------------------------------------------------------------------------------------------------------------------------------------------------------------------------------------------------------------------------------------------------------------------------------------------------------------------------------------------------------|-------------------------------------------------------------------------------------------------------------------------------------------------------------------------------------------------------------------------------------------------------------------------------------------------------------------------------------------------------------------------------------------------------------------------------------------------------------------------------------------------------------------------------------------------------------------------------------------------------------------------------------------------------------------------------------------------------------------------------------------------------------------------------------------------------------------------------------------------------------------------------------------------------------------------------------------------------------------------------------------------------------------------------------------------------------------------------------------------------------------------------------------------------------------------------------------------------------------------------------------------------------------------------------------------------------------------------------------------------------------------------------------------------------------------------------------------------------------------------------------------------------------------------------------------------------------------------------------------------------------------------------------------------------------------------------------------------------------------------------------------------------------------------------------------------------------------------------------------------------------------------------------------------------------------------------------------------------------------------------------------------------------------------------------------------------------------------------------------------------------------------------------------------------------------------------------------------------------------------------------------------------------------------------------------------------------------------------------------------------------------------------------------------------------------------|
|   |           |           |           |          | ENSG00000149483,<br>ENSG00000187049                                                                                                                         |                                                                             |                                                                                                                                                                                                                                                                                                                                                                                                                                                                                                                                                                                                                                                                                                                                                                                                                                                                                                                                                                                                                                                                                                                                                                                                    |                                                                                                                                                                                                                                                                                                                                                                                                                                                                                                                                                                                                                                                                                                                                                                                                                                                                                                                                                                                                                                                                                                                                                                                                                                                                                                                                                                                                                                                                                                                                                                                                                                                                                                                                                                                                                                                                                                                                                                                                                                                                                                                                                                                                                                                                                                                                                                                                                               |
| 1 | 147576333 | 148018267 | 147805232 | 6.54E-19 | ENSG00000203836,<br>ENSG00000255963,<br>ENSG00000122497                                                                                                     | NBPF24,<br>PPIAL4A,<br>NBPF14                                               | ENSG00000255963:                                                                                                                                                                                                                                                                                                                                                                                                                                                                                                                                                                                                                                                                                                                                                                                                                                                                                                                                                                                                                                                                                                                                                                                   | ENSG00000203836: ; ENSG00000255963: ; ENSG00000122497:                                                                                                                                                                                                                                                                                                                                                                                                                                                                                                                                                                                                                                                                                                                                                                                                                                                                                                                                                                                                                                                                                                                                                                                                                                                                                                                                                                                                                                                                                                                                                                                                                                                                                                                                                                                                                                                                                                                                                                                                                                                                                                                                                                                                                                                                                                                                                                        |
| 4 | 100054570 | 100521443 | 100254570 | 3.90E-18 | ENSG00000198099,<br>ENSG00000172955,<br>ENSG00000187758,<br>ENSG00000196616,<br>ENSG00000196344,<br>ENSG00000138813,<br>ENSG00000145331,<br>ENSG00000138823 | ADH4,<br>ADH6,<br>ADH1A,<br>ADH1B,<br>ADH7,<br>C4orf17,<br>TRMT10A,<br>MTTP | ENSG00000196616: Conduct disorder (maternal expressed emotions interaction), Esophageal cancer (alcohol interaction), Oral cavity and pharyngeal cancer, Alcohol dependence, Oropharynx cancer, Oral cavity cancer, Cerebrospinal fluid clusterin levels, Body mass index, Low density lipoprotein cholesterol levels, Risk-taking tendency (4-domain principal component model), LDL cholesterol levels, Relative fat intake, Relative protein intake, Apolipoprotein B levels, HDL cholesterol levels, Esophageal cancer, Alcohol consumption, Serum 25-Hydroxyvitamin D levels, C-reactive protein levels, Heel bone mineral density, Alcohol consumption (drinks per week), Alcohol consumption (drinkers vs non-drinkers), Alcohol consumption (heavy vs. light/non-drinkers), Pulse pressure, Alcohol consumption over the past year, Major depression and alcohol dependence, Lung cancer, Alcohol consumption in current drinkers, Blood urea nitrogen levels, Waist-hip ratio, Maximum habitual alcohol consumption, Regular attendance at a pub or social club, Urinary sodium excretion, Predicted visceral adipose tissue, Total cholesterol levels, Alcohol use disorder, Alcohol use | ENSG00000198099: Esophageal cancer (alcohol interaction), Alcohol dependence, Triglyceride levels, Serum metabolite levels, Blood protein levels, Alcohol use disorder, Platelet count, Eosinophil counts; ENSG00000172955: QRS duration; ENSG00000187758: Urinary metabolite levels in chronic kidney disease, Serum 25-Hydroxyvitamin D levels; ENSG00000196616: Conduct disorder (maternal expressed emotions interaction), Esophageal cancer (alcohol interaction), Oral cavity and pharyngeal cancer, Alcohol dependence, Oropharynx cancer, Oral cavity cancer, Cerebrospinal fluid clusterin levels, Body mass index, Low density lipoprotein cholesterol levels, Risk-taking tendency (4-domain principal component model), LDL cholesterol levels, Relative fat intake, Relative protein intake, Apolipoprotein B levels, HDL cholesterol levels, Esophageal cancer, Alcohol consumption, Serum 25-Hydroxyvitamin D levels, C-reactive protein levels, Heel bone mineral density, Alcohol consumption (drinks per week), Alcohol consumption (drinkers vs non-drinkers), Alcohol consumption (heavy vs. light/non-drinkers), Pulse pressure, Alcohol consumption over the past year, Major depression and alcohol dependence, Lung cancer, Alcohol consumption in current drinkers, Blood urea nitrogen levels, Waist-hip ratio, Maximum habitual alcohol consumption, Regular attendance at a pub or social club, Urinary sodium excretion, Predicted visceral adipose tissue, Total cholesterol levels, Alcohol use disorder, Alcohol use disorder (consumption score), Hemoglobin concentration, Problematic alcohol use, Alcohol consumption (drinks per week) (MTAG), Problematic alcohol use (MTAG), Alcohol use disorder (total score), Alcohol use disorder (dependence and problematic use scores), Bitter alcoholic beverage consumption, Alcohol dependence symptom count, Alcohol dependence (tolerance), Alcohol dependence (desire to cut drinking), Cardiovascular disease, Red blood cell count, Mean corpuscular hemoglobin, Systolic blood pressure; ENSG00000196344: Oral cavity and pharyngeal cancer, Blood protein levels, Maximum habitual alcohol consumption; ENSG00000138813: Metabolite levels (MHPG), Alcohol consumption (drinks per week), Pre-treatment viral load in HIV-1 infection, Height; ENSG00000145331: Gut microbiome composition (summer); ENSG00000138823: Celiac disease, |

|    |           |           |           |          |                                                   |                     |                                                                                                                                                                                                                                                                                                                                                                                                                                                                                                                                                                                                                     |                                                                                                                                                                                                                                                                                                                                                                                                                                                                                                                                                                                                                                                                  |
|----|-----------|-----------|-----------|----------|---------------------------------------------------|---------------------|---------------------------------------------------------------------------------------------------------------------------------------------------------------------------------------------------------------------------------------------------------------------------------------------------------------------------------------------------------------------------------------------------------------------------------------------------------------------------------------------------------------------------------------------------------------------------------------------------------------------|------------------------------------------------------------------------------------------------------------------------------------------------------------------------------------------------------------------------------------------------------------------------------------------------------------------------------------------------------------------------------------------------------------------------------------------------------------------------------------------------------------------------------------------------------------------------------------------------------------------------------------------------------------------|
|    |           |           |           |          |                                                   |                     | disorder (consumption score), Hemoglobin concentration, Problematic alcohol use, Alcohol consumption (drinks per week) (MTAG), Problematic alcohol use (MTAG), Alcohol use disorder (total score), Alcohol use disorder (dependence and problematic use scores), Bitter alcoholic beverage consumption, Alcohol dependence symptom count, Alcohol dependence (tolerance), Alcohol dependence (desire to cut drinking), Cardiovascular disease, Red blood cell count, Mean corpuscular hemoglobin, Systolic blood pressure                                                                                           | Triglyceride levels, Maximum habitual alcohol consumption, HDL cholesterol, Alcohol use disorder, Lung function (FVC)                                                                                                                                                                                                                                                                                                                                                                                                                                                                                                                                            |
| 2  | 226448377 | 226848377 | 226648377 | 1.06E-17 | ENSG00000144460                                   | NYAP2               | ENSG00000144460: Neurociticism, Docetaxel-induced peripheral neuropathy in metastatic castrate-resistant prostate cancer, HDL cholesterol levels, Neuroticism, Smoking initiation (ever regular vs never regular), Age of smoking initiation (MTAG), Positive affect, Well-being spectrum (multivariate analysis), Depressive symptoms, Gut microbiota (bacterial taxa, hurdle binary method), Smoking cessation (MTAG), Life satisfaction, Smoking initiation (ever regular vs never regular) (MTAG), Educational attainment (MTAG), Cognitive performance (MTAG), Highest math class taken (MTAG), Smoking status | ENSG00000144460: Neurociticism, Docetaxel-induced peripheral neuropathy in metastatic castrate-resistant prostate cancer, HDL cholesterol levels, Neuroticism, Smoking initiation (ever regular vs never regular), Age of smoking initiation (MTAG), Positive affect, Well-being spectrum (multivariate analysis), Depressive symptoms, Gut microbiota (bacterial taxa, hurdle binary method), Smoking cessation (MTAG), Life satisfaction, Smoking initiation (ever regular vs never regular) (MTAG), Educational attainment (MTAG), Cognitive performance (MTAG), Educational attainment (years of education), Highest math class taken (MTAG), Smoking status |
| 14 | 73102086  | 73504565  | 73302086  | 2.25E-17 | ENSG00000205683, ENSG00000119599, ENSG00000165861 | DPF3, DCAF4, ZFYVE1 | ENSG00000205683: 3-hydroxy-1-methylpropylmercapturic acid levels in smokers, Disease progression in age-related macular degeneration,                                                                                                                                                                                                                                                                                                                                                                                                                                                                               | ENSG00000205683: 3-hydroxy-1-methylpropylmercapturic acid levels in smokers, Disease progression in age-related macular degeneration, Pulse pressure, Metabolite levels, Rosacea symptom severity, Adolescent idiopathic scoliosis, C-reactive protein levels, Stem cell factor levels, Renal                                                                                                                                                                                                                                                                                                                                                                    |



|    |          |          |          |          |                                                   |                   |                                                                                                                                                                                                                                                                                                                                                                                                                                                                                                                                                                                                                                                                                                                                                                                                                                                                                                                                                                                               |                                                                                                                                                                                                                                                                                                                                                                                                                                                                                                                                                                                                                                                                                                                                                                                                                                                                                                                                                                                                                                                                                                                                                                                                                                                                                                                                                                                                                                                                                                                                                                                                                                                                                                                                                                                                                                                                                                                                                                                                                                           |
|----|----------|----------|----------|----------|---------------------------------------------------|-------------------|-----------------------------------------------------------------------------------------------------------------------------------------------------------------------------------------------------------------------------------------------------------------------------------------------------------------------------------------------------------------------------------------------------------------------------------------------------------------------------------------------------------------------------------------------------------------------------------------------------------------------------------------------------------------------------------------------------------------------------------------------------------------------------------------------------------------------------------------------------------------------------------------------------------------------------------------------------------------------------------------------|-------------------------------------------------------------------------------------------------------------------------------------------------------------------------------------------------------------------------------------------------------------------------------------------------------------------------------------------------------------------------------------------------------------------------------------------------------------------------------------------------------------------------------------------------------------------------------------------------------------------------------------------------------------------------------------------------------------------------------------------------------------------------------------------------------------------------------------------------------------------------------------------------------------------------------------------------------------------------------------------------------------------------------------------------------------------------------------------------------------------------------------------------------------------------------------------------------------------------------------------------------------------------------------------------------------------------------------------------------------------------------------------------------------------------------------------------------------------------------------------------------------------------------------------------------------------------------------------------------------------------------------------------------------------------------------------------------------------------------------------------------------------------------------------------------------------------------------------------------------------------------------------------------------------------------------------------------------------------------------------------------------------------------------------|
|    |          |          |          |          |                                                   |                   | <p>Pulse pressure, Metabolite levels, Rosacea symptom severity, Adolescent idiopathic scoliosis, C-reactive protein levels, Stem cell factor levels, Renal cell carcinoma, Intake of sweets, Body mass index, Atrial fibrillation, Hematocrit, Central corneal thickness, Hemoglobin concentration, Tuberculosis, Systemic lupus erythematosus, Intraocular pressure, Red cell distribution width</p>                                                                                                                                                                                                                                                                                                                                                                                                                                                                                                                                                                                         | <p>cell carcinoma, Intake of sweets, Body mass index, Atrial fibrillation, Hematocrit, Central corneal thickness, Hemoglobin concentration, Tuberculosis, Systemic lupus erythematosus, Intraocular pressure, Red cell distribution width; ENSG00000119599: Leukocyte telomere length, Eosinophil counts, Body mass index, Systolic blood pressure; ENSG00000165861: LDL cholesterol levels, Resistance to Mycobacterium tuberculosis in HIV-positive individuals measured by a negative tuberculin skin test (continuous), Red blood cell count, Body mass index, Intelligence, Mean corpuscular hemoglobin, Red cell distribution width</p>                                                                                                                                                                                                                                                                                                                                                                                                                                                                                                                                                                                                                                                                                                                                                                                                                                                                                                                                                                                                                                                                                                                                                                                                                                                                                                                                                                                             |
| 11 | 27418490 | 27933143 | 27632440 | 5.74E-17 | ENSG00000205213, ENSG00000148943, ENSG00000176697 | LGR4, LIN7C, BDNF | <p>ENSG00000176697: Obesity, Body mass index, Smoking behavior, Weight, Childhood body mass index, Menarche (age at onset), Menopause (age at onset), Coronary artery disease, Feeling nervous, Smoking initiation, Snoring, Risk-taking tendency (4-domain principal component model), General risk tolerance (MTAG), Triglyceride levels, Smoking status (ever vs never smokers), Body fat percentage, Fat-free mass, Diastolic blood pressure, Body mass index (joint analysis main effects and physical activity interaction), Coffee consumption, Worry, C-reactive protein levels, Systolic blood pressure, Hip circumference, Body mass index in physically active individuals, Body mass index in physically inactive individuals, Body mass index (SNP x SNP interaction), BMI (adjusted for smoking behaviour), BMI in non-smokers, BMI in smokers, Body mass index (joint analysis main effects and smoking interaction), Waist-hip ratio, Smoking initiation (ever regular vs</p> | <p>ENSG00000205213: Male-pattern baldness, Heel bone mineral density, Spontaneous preterm birth with premature rupture of membranes, Urate levels in obese individuals, Blond vs. brown/black hair color, Waist-hip ratio, Body mass index, Balding type 1, Lung function (FVC), Hair color; ENSG00000148943: Feeling miserable, Hip circumference, Survival in pancreatic cancer, Heel bone mineral density, Body mass index; ENSG00000176697: Obesity, Body mass index, Smoking behavior, Weight, Childhood body mass index, Menarche (age at onset), Menopause (age at onset), Coronary artery disease, Feeling nervous, Smoking initiation, Snoring, Risk-taking tendency (4-domain principal component model), General risk tolerance (MTAG), Triglyceride levels, Smoking status (ever vs never smokers), Body fat percentage, Fat-free mass, Diastolic blood pressure, Body mass index (joint analysis main effects and physical activity interaction), Coffee consumption, Worry, C-reactive protein levels, Systolic blood pressure, Hip circumference, Body mass index in physically active individuals, Body mass index in physically inactive individuals, Body mass index (SNP x SNP interaction), BMI (adjusted for smoking behaviour), BMI in non-smokers, BMI in smokers, Body mass index (joint analysis main effects and smoking interaction), Waist-hip ratio, Smoking initiation (ever regular vs never regular), Metabolic syndrome, Predicted visceral adipose tissue, Basal metabolic rate variance, Body mass index variance, Basal metabolic rate, Hand grip strength, Type 2 diabetes, Problematic alcohol use (MTAG), Diverticular disease, Alcohol consumption, Smoking cessation (MTAG), Age of smoking initiation (MTAG), Cigarettes smoked per day (MTAG), Smoking initiation (ever regular vs never regular) (MTAG), Educational attainment (years of education), Heel bone mineral density, Educational attainment (MTAG), Highest math class taken, Highest math class taken (MTAG), Smoking status</p> |

|    |           |           |           |          |                                                                                                                                                                                           |                                                                                    |                                                                                                                                                                                                                                                                                                                                                                                                                                                                                                                                                                                                                 |                                                                                                                                                                                                                                                                                                                                                                                                                                                                                                                                                                                                                                                                                                                                                                                                                                                                                               |
|----|-----------|-----------|-----------|----------|-------------------------------------------------------------------------------------------------------------------------------------------------------------------------------------------|------------------------------------------------------------------------------------|-----------------------------------------------------------------------------------------------------------------------------------------------------------------------------------------------------------------------------------------------------------------------------------------------------------------------------------------------------------------------------------------------------------------------------------------------------------------------------------------------------------------------------------------------------------------------------------------------------------------|-----------------------------------------------------------------------------------------------------------------------------------------------------------------------------------------------------------------------------------------------------------------------------------------------------------------------------------------------------------------------------------------------------------------------------------------------------------------------------------------------------------------------------------------------------------------------------------------------------------------------------------------------------------------------------------------------------------------------------------------------------------------------------------------------------------------------------------------------------------------------------------------------|
|    |           |           |           |          |                                                                                                                                                                                           |                                                                                    | never regular), Metabolic syndrome, Predicted visceral adipose tissue, Basal metabolic rate variance, Body mass index variance, Basal metabolic rate, Hand grip strength, Type 2 diabetes, Problematic alcohol use (MTAG), Diverticular disease, Alcohol consumption, Smoking cessation (MTAG), Age of smoking initiation (MTAG), Cigarettes smoked per day (MTAG), Smoking initiation (ever regular vs never regular) (MTAG), Educational attainment (years of education), Heel bone mineral density, Educational attainment (MTAG), Highest math class taken, Highest math class taken (MTAG), Smoking status |                                                                                                                                                                                                                                                                                                                                                                                                                                                                                                                                                                                                                                                                                                                                                                                                                                                                                               |
| 1  | 110586660 | 111157709 | 110793599 | 8.40E-17 | ENSG00000143093, ENSG00000156150, ENSG00000186150, ENSG00000197106, ENSG00000116396, ENSG00000162775, ENSG00000168679, ENSG00000134248, ENSG00000143125, ENSG00000143105, ENSG00000177301 | STRIP1, ALX3, UBL4B, SLC6A17, KCNC4, RBM15, SLC16A4, LAMTOR5, PROK1, KCNA10, KCNA2 | ENSG00000116396: Self-rated health, Oropharynx cancer, Gut microbiota (functional units), Red blood cell count, Educational attainment (MTAG), Cognitive performance (MTAG), Self-reported math ability, Self-reported math ability (MTAG), Educational attainment (years of education), Highest math class taken (MTAG)                                                                                                                                                                                                                                                                                        | ENSG00000143093: Optic disc size, Cognitive performance (MTAG), Educational attainment (years of education); ENSG00000156150: Optic disc size; ENSG00000186150: ; ENSG00000197106: Keratinocyte cancer (MTAG), Basal cell carcinoma, Educational attainment (years of education), Sunburns; ENSG00000116396: Self-rated health, Oropharynx cancer, Gut microbiota (functional units), Red blood cell count, Educational attainment (MTAG), Cognitive performance (MTAG), Self-reported math ability, Self-reported math ability (MTAG), Educational attainment (years of education), Highest math class taken (MTAG); ENSG00000162775: ; ENSG00000168679: Adolescent idiopathic scoliosis; ENSG00000134248: ; ENSG00000143125: ; ENSG00000143105: Bitter taste perception (phenylthiocarbamide) in obesity with metabolic syndrome; ENSG00000177301: Nonsyndromic cleft lip with cleft palate |
| 3  | 98038565  | 98438565  | 98238565  | 8.59E-17 | ENSG00000196098, ENSG00000206536, ENSG00000232382, ENSG00000231861, ENSG00000080822, ENSG00000080819, ENSG00000154165                                                                     | OR5K4, OR5K3, OR5K1, OR5K2, CLDND1, CPOX, GPR15                                    | ENSG00000080822: Post bronchodilator FEV1/FVC ratio                                                                                                                                                                                                                                                                                                                                                                                                                                                                                                                                                             | ENSG00000196098: ; ENSG00000206536: ; ENSG00000232382: ; ENSG00000231861: ; ENSG00000080822: Post bronchodilator FEV1/FVC ratio; ENSG00000080819: ; ENSG00000154165:                                                                                                                                                                                                                                                                                                                                                                                                                                                                                                                                                                                                                                                                                                                          |
| 17 | 8655348   | 9223981   | 8875399   | 9.12E-17 | ENSG00000183318, ENSG00000185156,                                                                                                                                                         | SPDYE4, MFS6L,                                                                     | ENSG00000141506: 3-hydroxypropylmercapturic acid                                                                                                                                                                                                                                                                                                                                                                                                                                                                                                                                                                | ENSG00000183318: ; ENSG00000185156: ; ENSG00000174083: ; ENSG00000141506: 3-hydroxypropylmercapturic acid levels in smokers,                                                                                                                                                                                                                                                                                                                                                                                                                                                                                                                                                                                                                                                                                                                                                                  |

|   |           |           |           |          |                                                                    |                             |                                                                                                                                                                                                                                                                                                                                                        |                                                                                                                                                                                                                                                                                                                                                                                                                                                                                                                                                                                                                                                                                                                                                                                                                                                                                                                                                                                                                                                                                                                                                                                                                                                |
|---|-----------|-----------|-----------|----------|--------------------------------------------------------------------|-----------------------------|--------------------------------------------------------------------------------------------------------------------------------------------------------------------------------------------------------------------------------------------------------------------------------------------------------------------------------------------------------|------------------------------------------------------------------------------------------------------------------------------------------------------------------------------------------------------------------------------------------------------------------------------------------------------------------------------------------------------------------------------------------------------------------------------------------------------------------------------------------------------------------------------------------------------------------------------------------------------------------------------------------------------------------------------------------------------------------------------------------------------------------------------------------------------------------------------------------------------------------------------------------------------------------------------------------------------------------------------------------------------------------------------------------------------------------------------------------------------------------------------------------------------------------------------------------------------------------------------------------------|
|   |           |           |           |          | ENSG00000174083, ENSG00000141506, ENSG00000065320, ENSG00000170310 | PIK3R6, PIK3R5, NTN1, STX8  | levels in smokers, Metabolite levels, Eosinophil counts, Autoimmune thyroid disease, Atypical femoral fracture in phosphonate treatment, Hypothyroidism                                                                                                                                                                                                | Metabolite levels, Eosinophil counts, Autoimmune thyroid disease, Atypical femoral fracture in phosphonate treatment, Hypothyroidism; ENSG00000065320: Orofacial clefts, Breast cancer (prognosis), Neuroticism, Percentage gas trapping, 3-hydroxypropylmercapturic acid levels in smokers, Lobe attachment (rater-scored or self-reported), Heel bone mineral density, Feeling hurt, Blood protein levels, Nonsyndromic cleft lip with or without cleft palate, Cleft lip with or without cleft palate, Colonoscopy-negative controls vs population controls, Rostral middle frontal gyrus volume, Total grey matter volume, Cortex volume, White matter microstructure (fractional anisotropy), Bisphosphonate-associated atypical femoral fracture, Sensitivity to environmental stress and adversity; ENSG00000170310: antipsychotic drug dosage in schizophrenia or schizoaffective disorder, HDL cholesterol change in response to fenofibrate in statin-treated type 2 diabetes, Diabetic kidney disease, Obstructive sleep apnea trait (apnea hypopnea index), Borderline personality disorder, White matter microstructure (mode of anisotropy), Gut microbiota (bacterial taxa, hurdle binary method), Blood protein levels, Height |
| 8 | 133319098 | 133719098 | 133519098 | 3.22E-16 | ENSG00000184156, ENSG00000129295, ENSG00000165071                  | KCNQ3, LRR6, TMEM71         | ENSG00000129295: Adolescent idiopathic scoliosis, Cognitive performance (MTAG)                                                                                                                                                                                                                                                                         | ENSG00000184156: Coronary artery calcification, LDL peak particle diameter (total fat intake interaction), QT interval, Interleukin-8 levels, Spontaneous adipocyte lipolysis, Height, Stimulated adipocyte lipolysis, Major depressive disorder, Rate of cognitive decline in Alzheimer's disease, Type 2 diabetes; ENSG00000129295: Adolescent idiopathic scoliosis, Cognitive performance (MTAG); ENSG00000165071: Thyroid stimulating hormone levels, Hyperthyroidism, Smoking initiation (ever regular vs never regular) (MTAG), Age of smoking initiation (MTAG), Educational attainment (MTAG), Educational attainment (years of education), Height                                                                                                                                                                                                                                                                                                                                                                                                                                                                                                                                                                                     |
| 3 | 100737908 | 101365506 | 101082807 | 6.97E-16 | ENSG00000081148, ENSG00000138468, ENSG00000174173, ENSG00000081154 | IMPG2, SENP7, TRMT10C, PCNP | ENSG00000138468: Risk-taking tendency (4-domain principal component model), Mosaic loss of chromosome Y (Y chromosome dosage), Appendicular lean mass, Mean corpuscular hemoglobin, Alcohol consumption (drinks per week), Diastolic blood pressure, Red blood cell count, Platelet count, Alzheimer's disease (late onset), Bitter alcoholic beverage | ENSG00000081148: Inflammatory bowel disease, Crohn's disease, Mean corpuscular hemoglobin; ENSG00000138468: Risk-taking tendency (4-domain principal component model), Mosaic loss of chromosome Y (Y chromosome dosage), Appendicular lean mass, Mean corpuscular hemoglobin, Alcohol consumption (drinks per week), Diastolic blood pressure, Red blood cell count, Platelet count, Alzheimer's disease (late onset), Bitter alcoholic beverage consumption, Mean corpuscular volume; ENSG00000174173: Eosinophil counts; ENSG00000081154:                                                                                                                                                                                                                                                                                                                                                                                                                                                                                                                                                                                                                                                                                                   |

|    |           |           |           |          |                                                                                                                                        |                                                            |                                                                                                                                                                                                                                                                                                                                                                                                                                                                                                                                        |                                                                                                                                                                                                                                                                                                                                                                                                                                                                                                                                                                                                                                                                                                                                                                                                                                                                                                                                                                                                                                    |
|----|-----------|-----------|-----------|----------|----------------------------------------------------------------------------------------------------------------------------------------|------------------------------------------------------------|----------------------------------------------------------------------------------------------------------------------------------------------------------------------------------------------------------------------------------------------------------------------------------------------------------------------------------------------------------------------------------------------------------------------------------------------------------------------------------------------------------------------------------------|------------------------------------------------------------------------------------------------------------------------------------------------------------------------------------------------------------------------------------------------------------------------------------------------------------------------------------------------------------------------------------------------------------------------------------------------------------------------------------------------------------------------------------------------------------------------------------------------------------------------------------------------------------------------------------------------------------------------------------------------------------------------------------------------------------------------------------------------------------------------------------------------------------------------------------------------------------------------------------------------------------------------------------|
|    |           |           |           |          |                                                                                                                                        |                                                            | consumption, Mean corpuscular volume                                                                                                                                                                                                                                                                                                                                                                                                                                                                                                   |                                                                                                                                                                                                                                                                                                                                                                                                                                                                                                                                                                                                                                                                                                                                                                                                                                                                                                                                                                                                                                    |
| 18 | 46132358  | 46550865  | 46350865  | 7.05E-16 | ENSG00000134030, ENSG00000101665                                                                                                       | CTIF, SMAD7                                                | ENSG00000101665: Colorectal cancer, Hematocrit, Creatinine levels, Glomerular filtration rate, Normal facial asymmetry (angle of surface orientation score), Heel bone mineral density, Red blood cell count, Hemoglobin concentration, Hemoglobin levels, Parental longevity (at least one long-lived parent), Colorectal cancer or advanced adenoma, Estimated glomerular filtration rate, Atrial fibrillation, Eosinophil counts, Asthma, Mean corpuscular hemoglobin, Mean corpuscular volume, Red cell distribution width, Eczema | ENSG00000134030: IgG glycosylation, Lung function (FVC), Response to carboplatin in ovarian cancer (MTT IC50), Male-pattern baldness, Red blood cell count, Adolescent idiopathic scoliosis, Automobile speeding propensity, Circulating odd-numbered chain saturated fatty acid levels (C15:0), Migraine with aura, White blood cell count, Iris heterochromicity, Lumbar spine bone mineral density (integral), Rate of cognitive decline in Alzheimer's disease, Height, Smoking status; ENSG00000101665: Colorectal cancer, Hematocrit, Creatinine levels, Glomerular filtration rate, Normal facial asymmetry (angle of surface orientation score), Heel bone mineral density, Red blood cell count, Hemoglobin concentration, Hemoglobin levels, Parental longevity (at least one long-lived parent), Colorectal cancer or advanced adenoma, Estimated glomerular filtration rate, Atrial fibrillation, Eosinophil counts, Asthma, Mean corpuscular hemoglobin, Mean corpuscular volume, Red cell distribution width, Eczema |
| 22 | 31356103  | 31756103  | 31556103  | 1.03E-15 | ENSG00000133422, ENSG00000183963, ENSG00000185133, ENSG00000100078, ENSG00000138942, ENSG00000182541, ENSG00000100100, ENSG00000100105 | MORC2, SMTN, INPP5J, PLA2G3, RNF185, LIMK2, PIK3IP1, PATZ1 | ENSG00000100078: Serum 25-Hydroxyvitamin D levels                                                                                                                                                                                                                                                                                                                                                                                                                                                                                      | ENSG00000133422: ; ENSG00000183963: Lung function (FEV1/FVC); ENSG00000185133: Gut microbiota (beta diversity); ENSG00000100078: Serum 25-Hydroxyvitamin D levels; ENSG00000138942: Apolipoprotein A1 levels, Waist circumference, Waist-to-hip ratio adjusted for BMI, Neutrophil count, Waist circumference adjusted for body mass index, Waist-hip ratio; ENSG00000182541: Type 2 diabetes nephropathy, Eosinophil percentage of white cells, Eosinophil counts, Paclitaxel-induced neuropathy, Multiple sclerosis, Sum eosinophil basophil counts, Eosinophil percentage of granulocytes, Neutrophil percentage of granulocytes, Schizophrenia, Metabolite levels, Reaction time; ENSG00000100100: ; ENSG00000100105: Height, Reticulocyte fraction of red cells, Reticulocyte count, Red cell distribution width, Eosinophil counts                                                                                                                                                                                           |
| 3  | 101491814 | 101891814 | 101691814 | 1.40E-15 | ENSG00000144815, ENSG00000144802, ENSG00000170044                                                                                      | NXPE3, NFKBIZ, ZPLD1                                       | ENSG00000144802: Ulcerative colitis, Colorectal cancer, Spatial memory                                                                                                                                                                                                                                                                                                                                                                                                                                                                 | ENSG00000144815: ; ENSG00000144802: Ulcerative colitis, Colorectal cancer, Spatial memory; ENSG00000170044: Post bronchodilator FEV1/FVC ratio, Adolescent idiopathic scoliosis, C-reactive protein levels, Waist-to-hip circumference ratio (alcohol intake interaction), Response to ranibizumab in age-related macular degeneration (exudative)                                                                                                                                                                                                                                                                                                                                                                                                                                                                                                                                                                                                                                                                                 |
| 12 | 27574693  | 27974693  | 27774693  | 1.53E-15 | ENSG00000029153, ENSG00000165935, ENSG00000110841, ENSG00000174236,                                                                    | ARNTL2, SMCO2, PPFIBP1, REP15,                             | ENSG00000110841: Cerebral cortical growth, Tinnitus in cisplatin-treated testicular cancer                                                                                                                                                                                                                                                                                                                                                                                                                                             | ENSG00000029153: Body fat percentage, Waist-to-hip ratio adjusted for BMI, Waist-hip ratio; ENSG00000165935: Obstructive sleep apnea trait (apnea hypopnea index), Lung cancer in ever smokers; ENSG00000110841: Cerebral cortical growth, Tinnitus in cisplatin-treated                                                                                                                                                                                                                                                                                                                                                                                                                                                                                                                                                                                                                                                                                                                                                           |

|  |  |  |  |  |                                                       |                              |  |                                                                                                                                                                                                                               |
|--|--|--|--|--|-------------------------------------------------------|------------------------------|--|-------------------------------------------------------------------------------------------------------------------------------------------------------------------------------------------------------------------------------|
|  |  |  |  |  | ENSG0000061794,<br>ENSG00000205693,<br>ENSG0000087448 | MRPS35,<br>MANSC4,<br>KLHL42 |  | testicular cancer; ENSG0000174236: ; ENSG0000061794: Type 2 diabetes, Type 2 diabetes (adjusted for BMI), Lung function (FEV1/FVC); ENSG00000205693: Blood protein levels; ENSG0000087448: Pulse pressure, Resting heart rate |
|--|--|--|--|--|-------------------------------------------------------|------------------------------|--|-------------------------------------------------------------------------------------------------------------------------------------------------------------------------------------------------------------------------------|

4608

4609 **Table S4d.3 West Eurasia.cw\_hg**

4610

4611  
4612

## 4613 References

- 4614 1. Luu, K., Bazin, E. & Blum, M. G. B. pcadapt: an R package to perform genome scans  
4615 for selection based on principal component analysis. *Mol. Ecol. Resour.* **17**, 67–77  
4616 (2017).
- 4617 2. Durinck, S., Spellman, P. T., Birney, E. & Huber, W. Mapping identifiers for the  
4618 integration of genomic datasets with the R/Bioconductor package biomaRt. *Nat. Protoc.*  
4619 **4**, 1184–1191 (2009).
- 4620 3. Wilde, S. *et al.* Direct evidence for positive selection of skin, hair, and eye  
4621 pigmentation in Europeans during the last 5,000 y. *Proc. Natl. Acad. Sci. U. S. A.* **111**,  
4622 4832–4837 (2014).
- 4623 4. Pickrell, J. K. *et al.* Signals of recent positive selection in a worldwide sample of  
4624 human populations. *Genome Research* vol. 19 826–837 (2009).
- 4625 5. Lao, O., de Gruijter, J. M., van Duijn, K., Navarro, A. & Kayser, M. Signatures of  
4626 positive selection in genes associated with human skin pigmentation as revealed from  
4627 analyses of single nucleotide polymorphisms. *Ann. Hum. Genet.* **71**, 354–369 (2007).
- 4628 6. Herchuelz, A. *Sodium-calcium exchange and the plasma membrane Ca<sup>2+</sup>-ATPase*  
4629 *in cell function: fifth international conference.* (Wiley-Blackwell, 2007).
- 4630 7. Bryk, J. *et al.* Positive Selection in East Asians for an EDAR Allele that Enhances  
4631 NF-κB Activation. *PLoS ONE* vol. 3 e2209 (2008).
- 4632 8. Hider, J. L. *et al.* Exploring signatures of positive selection in pigmentation candidate  
4633 genes in populations of East Asian ancestry. *BMC Evol. Biol.* **13**, 150 (2013).
- 4634 9. Duforet-Frebourg, N., Luu, K., Laval, G., Bazin, E. & Blum, M. G. B. Detecting  
4635 Genomic Signatures of Natural Selection with Principal Component Analysis:  
4636 Application to the 1000 Genomes Data. *Mol. Biol. Evol.* **33**, 1082–1093 (2016).
- 4637 10. Prashanth, S. & Deshmukh, S. Ectodermal Dysplasia: A Genetic Review.  
4638 *International Journal of Clinical Pediatric Dentistry* vol. 5 197–202 (2012).

- 4639 11. Kimura, R. *et al.* A common variation in EDAR is a genetic determinant of  
4640 shovel-shaped incisors. *Am. J. Hum. Genet.* **85**, 528–535 (2009).
- 4641 12. Izawa, T. *et al.* ASXL2 Regulates Glucose, Lipid, and Skeletal Homeostasis.  
4642 *Cell Rep.* **11**, 1625–1637 (2015).
- 4643 13. Zou, W. *et al.* Myeloid-specific Asxl2 deletion limits diet-induced obesity by  
4644 regulating energy expenditure. *J. Clin. Invest.* **130**, 2644–2656 (2020).
- 4645 14. Park, U.-H., Yoon, S. K., Park, T., Kim, E.-J. & Um, S.-J. Additional Sex  
4646 Comb-like (ASXL) Proteins 1 and 2 Play Opposite Roles in Adipogenesis via Reciprocal  
4647 Regulation of Peroxisome Proliferator-activated Receptor  $\gamma$ . *Journal of Biological*  
4648 *Chemistry* vol. 286 1354–1363 (2011).
- 4649 15. Ponsuksili, S. *et al.* Epigenome-wide skeletal muscle DNA methylation  
4650 profiles at the background of distinct metabolic types and ryanodine receptor variation  
4651 in pigs. *BMC Genomics* **20**, 492 (2019).
- 4652 16. Samad, M. B. *et al.* [6]-Gingerol, from *Zingiber officinale*, potentiates GLP-1  
4653 mediated glucose-stimulated insulin secretion pathway in pancreatic  $\beta$ -cells and  
4654 increases RAB8/RAB10-regulated membrane presentation of GLUT4 transporters in  
4655 skeletal muscle to improve hyperglycemia in *Lepr<sup>db/db</sup>* type 2 diabetic mice. *BMC*  
4656 *Complementary and Alternative Medicine* vol. 17 (2017).
- 4657 17. Vazirani, R. P. *et al.* Disruption of Adipose Rab10-Dependent Insulin  
4658 Signaling Causes Hepatic Insulin Resistance. *Diabetes* **65**, 1577–1589 (2016).
- 4659 18. Hsieh, P. *et al.* Exome Sequencing Provides Evidence of Polygenic  
4660 Adaptation to a Fat-Rich Animal Diet in Indigenous Siberian Populations. *Mol. Biol.*  
4661 *Evol.* **34**, 2913–2926 (2017).
- 4662 19. Thapa, D. *et al.* The protein acetylase GCN5L1 modulates hepatic fatty acid  
4663 oxidation activity via acetylation of the mitochondrial  $\beta$ -oxidation enzyme HADHA. *J.*  
4664 *Biol. Chem.* **293**, 17676–17684 (2018).
- 4665 20. Baloni, P. *et al.* Genome-scale metabolic model of the rat liver predicts effects  
4666 of diet restriction. *Sci. Rep.* **9**, 9807 (2019).

- 4667 21. Ong, H. S. & Yim, H. C. H. Microbial Factors in Inflammatory Diseases and  
4668 Cancers. *Regulation of Inflammatory Signaling in Health and Disease* 153–174 (2017)  
4669 doi:10.1007/978-981-10-5987-2\_7.
- 4670 22. Logsdon, B. A., Hoffman, G. E. & Mezey, J. G. Mouse obesity network  
4671 reconstruction with a variational Bayes algorithm to employ aggressive false positive  
4672 control. *BMC Bioinformatics* **13**, 53 (2012).
- 4673 23. Pei, Y.-F. *et al.* Genomic variants at 20p11 associated with body fat mass in  
4674 the European population. *Obesity* **25**, 757–764 (2017).
- 4675 24. Sabir, J. S. M. *et al.* Unraveling the role of salt-sensitivity genes in obesity  
4676 with integrated network biology and co-expression analysis. *PLoS One* **15**, e0228400  
4677 (2020).
- 4678 25. Wu, H. *et al.* Transcriptome Sequencing to Detect the Potential Role of Long  
4679 Noncoding RNAs in Salt-Sensitive Hypertensive Rats. *Biomed Res. Int.* **2019**, 2816959  
4680 (2019).
- 4681 26. Wang, L. *et al.* Peakwide Mapping on Chromosome 3q13 Identifies the Kalirin  
4682 Gene as a Novel Candidate Gene for Coronary Artery Disease. *The American Journal*  
4683 *of Human Genetics* vol. 80 650–663 (2007).
- 4684 27. Ikram, M. A., Seshadri, S. & Bis, J. C. Genomewide Association Studies of  
4685 Stroke. *Journal of Vascular Surgery* vol. 50 467 (2009).
- 4686 28. Krug, T. *et al.* Kalirin: a novel genetic risk factor for ischemic stroke. *Hum.*  
4687 *Genet.* **127**, 513–523 (2010).
- 4688 29. Zang, X.-L. *et al.* Association of a SNP in SLC35F3 Gene with the Risk of  
4689 Hypertension in a Chinese Han Population. *Frontiers in Genetics* vol. 7 (2016).
- 4690 30. Zhang, K. *et al.* Genetic implication of a novel thiamine transporter in human  
4691 hypertension. *J. Am. Coll. Cardiol.* **63**, 1542–1555 (2014).
- 4692 31. Pacheu-Grau, D. *et al.* COA6 Facilitates Cytochrome c Oxidase Biogenesis  
4693 as Thiol-reductase for Copper Metallochaperones in Mitochondria. *J. Mol. Biol.* **432**,  
4694 2067–2079 (2020).



- 4695 32. Russo, L. *et al.* Cholesterol 25-hydroxylase (CH25H) as a promoter of  
4696 adipose tissue inflammation in obesity and diabetes. *Mol Metab* **39**, 100983 (2020).
- 4697 33. Zhao, J., Chen, J., Li, M., Chen, M. & Sun, C. Multifaceted Functions of  
4698 CH25H and 25HC to Modulate the Lipid Metabolism, Immune Responses, and Broadly  
4699 Antiviral Activities. *Viruses* **12**, (2020).
- 4700 34. Demir, A., Kahraman, R., Candan, G. & Ergen, A. The role of FAS gene  
4701 variants in inflammatory bowel disease. *Turk. J. Gastroenterol.* **31**, 356–361 (2020).
- 4702 35. Rieux-Laucat, F., Magérus-Chatinet, A. & Neven, B. The Autoimmune  
4703 Lymphoproliferative Syndrome with Defective FAS or FAS-Ligand Functions. *Journal of*  
4704 *Clinical Immunology* vol. 38 558–568 (2018).
- 4705 36. Karis, K. *et al.* Altered Expression Profile of IgLON Family of Neural Cell  
4706 Adhesion Molecules in the Dorsolateral Prefrontal Cortex of Schizophrenic Patients.  
4707 *Front. Mol. Neurosci.* **11**, 8 (2018).
- 4708 37. Liu, J., Li, M. & Su, B. GWAS-identified schizophrenia risk SNPs  
4709 atTSPAN18 are highly diverged between Europeans and East Asians. *American Journal*  
4710 *of Medical Genetics Part B: Neuropsychiatric Genetics* vol. 171 1032–1040 (2016).
- 4711 38. Fu, H.-Y. *et al.* The mutation spectrum of the SLC25A13 gene in Chinese  
4712 infants with intrahepatic cholestasis and aminoacidemia. *J. Gastroenterol.* **46**, 510–518  
4713 (2011).
- 4714 39. Chen, J.-L., Zhang, Z.-H., Li, B.-X., Cai, Z. & Zhou, Q.-H. Bioinformatic and  
4715 functional analysis of promoter region of human SLC25A13 gene. *Gene* **693**, 69–75  
4716 (2019).
- 4717 40. Vitoria, I. *et al.* Citrin deficiency in a Romanian child living in Spain highlights  
4718 the worldwide distribution of this defect and illustrates the value of nutritional therapy.  
4719 *Molecular Genetics and Metabolism* vol. 110 181–183 (2013).
- 4720 41. Fiermonte, G. *et al.* An adult with type 2 citrullinemia presenting in Europe. *N.*  
4721 *Engl. J. Med.* **358**, 1408–1409 (2008).
- 4722 42. Sarkar, A. & Nandineni, M. R. Association of common genetic variants with

- 4723 human skin color variation in Indian populations. *Am. J. Hum. Biol.* **30**, (2018).
- 4724 43. Edwards, M. *et al.* Association of the OCA2 polymorphism His615Arg with  
4725 melanin content in east Asian populations: further evidence of convergent evolution of  
4726 skin pigmentation. *PLoS Genet.* **6**, e1000867 (2010).
- 4727 44. Eiberg, H. *et al.* Blue eye color in humans may be caused by a perfectly  
4728 associated founder mutation in a regulatory element located within the HERC2 gene  
4729 inhibiting OCA2 expression. *Human Genetics* vol. 123 177–187 (2008).
- 4730 45. Sturm, R. A. *et al.* A Single SNP in an Evolutionary Conserved Region within  
4731 Intron 86 of the HERC2 Gene Determines Human Blue-Brown Eye Color. *The*  
4732 *American Journal of Human Genetics* vol. 82 424–431 (2008).
- 4733 46. Allentoft, M. E. *et al.* Population genomics of Bronze Age Eurasia. *Nature*  
4734 **522**, 167–172 (2015).
- 4735 47. Mathieson, I. *et al.* Genome-wide patterns of selection in 230 ancient  
4736 Eurasians. *Nature* **528**, 499–503 (2015).
- 4737 48. Barreiro, L. B. *et al.* Evolutionary dynamics of human Toll-like receptors and  
4738 their different contributions to host defense. *PLoS Genet.* **5**, e1000562 (2009).
- 4739 49. Astiz, M. & Oster, H. GLUT12-A promising new target for the treatment of  
4740 insulin resistance in obesity and type 2 diabetes. *Acta physiologica* vol. 226 e13329  
4741 (2019).
- 4742 50. Waller, A. P. *et al.* GLUT12 functions as a basal and insulin-independent  
4743 glucose transporter in the heart. *Biochim. Biophys. Acta* **1832**, 121–127 (2013).
- 4744 51. Joehanes, R. *et al.* Integrated genome-wide analysis of expression  
4745 quantitative trait loci aids interpretation of genomic association studies. *Genome Biol.*  
4746 **18**, 16 (2017).
- 4747 52. CARDIoGRAMplusC4D Consortium *et al.* Large-scale association analysis  
4748 identifies new risk loci for coronary artery disease. *Nat. Genet.* **45**, 25–33 (2013).
- 4749 53. Limaye, N. *et al.* Somatic mutations in angiotensin receptor gene TEK cause  
4750 solitary and multiple sporadic venous malformations. *Nat. Genet.* **41**, 118–124 (2009).

- 4751 54. Jones, N., Iljin, K., Dumont, D. J. & Alitalo, K. Tie receptors: new modulators  
4752 of angiogenic and lymphangiogenic responses. *Nature Reviews Molecular Cell Biology*  
4753 vol. 2 257–267 (2001).
- 4754 55. Dumont, D. J. *et al.* Dominant-negative and targeted null mutations in the  
4755 endothelial receptor tyrosine kinase, tek, reveal a critical role in vasculogenesis of the  
4756 embryo. *Genes Dev.* **8**, 1897–1909 (1994).
- 4757 56. Gál, Z. *et al.* Investigation of the Possible Role of Tie2 Pathway and TEK  
4758 Gene in Asthma and Allergic Conjunctivitis. *Frontiers in Genetics* vol. 11 (2020).
- 4759 57. Cmejla, R. *et al.* Human MRCKalpha is regulated by cellular iron levels and  
4760 interferes with transferrin iron uptake. *Biochem. Biophys. Res. Commun.* **395**, 163–167  
4761 (2010).
- 4762 58. Richard, C. *et al.* Myotonic dystrophy kinase-related CDC42-binding kinase  $\alpha$ ,  
4763 a new transferrin receptor type 2-binding partner, is a regulator of erythropoiesis. *Am. J.*  
4764 *Hematol.* (2021) doi:10.1002/ajh.26104.
- 4765 59. Molineros, J. E. *et al.* Mechanistic Characterization of RASGRP1 Variants  
4766 Identifies an hnRNP-K-Regulated Transcriptional Enhancer Contributing to SLE  
4767 Susceptibility. *Frontiers in Immunology* vol. 10 (2019).
- 4768 60. Potier, M. L. *et al.* RasGRP1 and RasGRP3 expression in lymphocytes of  
4769 rheumatoid arthritis patients. *Annals of the Rheumatic Diseases* vol. 71 A54.2–A54  
4770 (2012).
- 4771 61. Somekh, I. *et al.* Correction to: Novel Mutations in RASGRP1 Are Associated  
4772 with Immunodeficiency, Immune Dysregulation, and EBV-Induced Lymphoma. *J. Clin.*  
4773 *Immunol.* **38**, 711 (2018).
- 4774 62. Karlas, A. *et al.* Genome-wide RNAi screen identifies human host factors  
4775 crucial for influenza virus replication. *Nature* **463**, 818–822 (2010).
- 4776 63. Hao, L. *et al.* Drosophila RNAi screen identifies host genes important for  
4777 influenza virus replication. *Nature* **454**, 890–893 (2008).
- 4778 64. Mariniello, B. *et al.* Analysis of the 11 $\beta$ -Hydroxysteroid Dehydrogenase Type

- 4779 2 Gene (HSD11B2) in Human Essential Hypertension\*. *Am. J. Hypertens.* **18**, 1091–  
4780 1098 (2005).
- 4781 65. Zeller, T. *et al.* Transcriptome-Wide Analysis Identifies Novel Associations  
4782 With Blood Pressure. *Hypertension* **70**, 743–750 (2017).
- 4783 66. Gunaratnam, K., Vidal, C., Gimble, J. M. & Duque, G. Mechanisms of  
4784 palmitate-induced lipotoxicity in human osteoblasts. *Endocrinology* **155**, 108–116  
4785 (2014).
- 4786 67. Lumish, H. S., O'Reilly, M. & Reilly, M. P. Sex Differences in Genomic Drivers  
4787 of Adipose Distribution and Related Cardiometabolic Disorders: Opportunities for  
4788 Precision Medicine. *Arterioscler. Thromb. Vasc. Biol.* **40**, 45–60 (2020).
- 4789 68. Ng, M. C. Y. *et al.* Discovery and fine-mapping of adiposity loci using high  
4790 density imputation of genome-wide association studies in individuals of African  
4791 ancestry: African Ancestry Anthropometry Genetics Consortium. *PLoS Genet.* **13**,  
4792 e1006719 (2017).
- 4793 69. Ueda, K. *et al.* Renal Dysfunction Induced by Kidney-Specific Gene Deletion  
4794 of *as* as a Primary Cause of Salt-Dependent Hypertension. *Hypertension* **70**, 111–118  
4795 (2017).
- 4796 70. Agarwal, A. K. *et al.* CA-Repeat polymorphism in intron 1 of HSD11B2 :  
4797 effects on gene expression and salt sensitivity. *Hypertension* **36**, 187–194 (2000).
- 4798 71. Buckley, M. T. *et al.* Selection in Europeans on Fatty Acid Desaturases  
4799 Associated with Dietary Changes. *Mol. Biol. Evol.* **34**, 1307–1318 (2017).
- 4800 72. Ye, K., Gao, F., Wang, D., Bar-Yosef, O. & Keinan, A. Dietary adaptation of  
4801 FADS genes in Europe varied across time and geography. *Nat Ecol Evol* **1**, 167 (2017).
- 4802 73. Mathieson, S. & Mathieson, I. FADS1 and the Timing of Human Adaptation to  
4803 Agriculture. *Mol. Biol. Evol.* **35**, 2957–2970 (2018).
- 4804 74. Pan, G. *et al.* PATZ1 down-regulates FADS1 by binding to rs174557 and is  
4805 opposed by SP1/SREBP1c. *Nucleic Acids Res.* **45**, 2408–2422 (2017).
- 4806 75. Tabur, S. *et al.* Evidence for elevated (LIMK2 and CFL1) and suppressed

- 4807 (ICAM1, EZR, MAP2K2, and NOS3) gene expressions in metabolic syndrome.  
4808 *Endocrine* **53**, 465–470 (2016).
- 4809 76. Fairn, G. D. & McMaster, C. R. Emerging roles of the oxysterol-binding  
4810 protein family in metabolism, transport, and signaling. *Cell. Mol. Life Sci.* **65**, 228–236  
4811 (2008).
- 4812 77. Lehto, M. & Olkkonen, V. M. The OSBP-related proteins: a novel protein  
4813 family involved in vesicle transport, cellular lipid metabolism, and cell signalling.  
4814 *Biochim. Biophys. Acta* **1631**, 1–11 (2003).
- 4815 78. Sánchez-Solana, B., Li, D.-Q. & Kumar, R. Cytosolic functions of MORC2 in  
4816 lipogenesis and adipogenesis. *Biochim. Biophys. Acta* **1843**, 316–326 (2014).
- 4817 79. Sartipy, P., Camejo, G., Svensson, L. & Hurt-Camejo, E. Phospholipase A2  
4818 modification of lipoproteins: potential effects on atherogenesis. *Adv. Exp. Med. Biol.*  
4819 **507**, 3–7 (2002).
- 4820 80. Dennis, E. A., Cao, J., Hsu, Y.-H., Magrioti, V. & Kokotos, G. Phospholipase  
4821 A2 Enzymes: Physical Structure, Biological Function, Disease Implication, Chemical  
4822 Inhibition, and Therapeutic Intervention. *Chem. Rev.* **111**, 6130 (2011).
- 4823 81. Wyles, J. P., Perry, R. J. & Ridgway, N. D. Characterization of the sterol-  
4824 binding domain of oxysterol-binding protein (OSBP)-related protein 4 reveals a novel  
4825 role in vimentin organization. *Experimental Cell Research* vol. 313 1426–1437 (2007).
- 4826 82. Tintle, N. L. *et al.* A genome-wide association study of saturated, mono- and  
4827 polyunsaturated red blood cell fatty acids in the Framingham Heart Offspring Study.  
4828 *Prostaglandins Leukot. Essent. Fatty Acids* **94**, 65–72 (2015).
- 4829 83. Thomas, C. *et al.* LPCAT3 deficiency in hematopoietic cells alters cholesterol  
4830 and phospholipid homeostasis and promotes atherosclerosis. *Atherosclerosis* **275**,  
4831 409–418 (2018).
- 4832 84. Liu, N. *et al.* Hyperuricemia induces lipid disturbances mediated by LPCAT3  
4833 upregulation in the liver. *FASEB J.* (2020) doi:10.1096/fj.202000950R.
- 4834 85. Godahewa, G. I., Bathige, S. D. N. K., Herath, H. M. L. P. B., Noh, J. K. &

4835 Lee, J. Characterization of rock bream (*Oplegnathus fasciatus*) complement  
4836 components C1r and C1s in terms of molecular aspects, genomic modulation, and  
4837 immune responsive transcriptional profiles following bacterial and viral pathogen  
4838 exposure. *Fish Shellfish Immunol.* **46**, 656–668 (2015).

4839 86. Dai, D.-F. *et al.* Plasma concentration of SCUBE1, a novel platelet protein, is  
4840 elevated in patients with acute coronary syndrome and ischemic stroke. *J. Am. Coll.*  
4841 *Cardiol.* **51**, 2173–2180 (2008).

4842 87. Huang, X., Liu, G., Guo, J. & Su, Z. The PI3K/AKT pathway in obesity and  
4843 type 2 diabetes. *Int. J. Biol. Sci.* **14**, 1483–1496 (2018).

4844 88. Zhong, X. *et al.* LNK deficiency decreases obesity-induced insulin resistance  
4845 by regulating GLUT4 through the PI3K-Akt-AS160 pathway in adipose tissue. *Aging*  
4846 **12**, 17150–17166 (2020).

4847 89. López-Gómez, C. *et al.* Oleic Acid Protects Against Insulin Resistance by  
4848 Regulating the Genes Related to the PI3K Signaling Pathway. *J. Clin. Med. Res.* **9**,  
4849 (2020).

4850 90. Sandrini, L. *et al.* Association between Obesity and Circulating Brain-Derived  
4851 Neurotrophic Factor (BDNF) Levels: Systematic Review of Literature and Meta-  
4852 Analysis. *Int. J. Mol. Sci.* **19**, (2018).

4853 91. Lommatzsch, M. *et al.* The impact of age, weight and gender on BDNF levels  
4854 in human platelets and plasma. *Neurobiol. Aging* **26**, 115–123 (2005).

4855 92. Tsuchida, A. *et al.* Brain-derived neurotrophic factor ameliorates lipid  
4856 metabolism in diabetic mice. *Diabetes Obes. Metab.* **4**, 262–269 (2002).

4857 93. Wu, A., Molteni, R., Ying, Z. & Gomez-Pinilla, F. A saturated-fat diet  
4858 aggravates the outcome of traumatic brain injury on hippocampal plasticity and  
4859 cognitive function by reducing brain-derived neurotrophic factor. *Neuroscience* **119**,  
4860 365–375 (2003).

4861 94. Molteni, R., Barnard, R. J., Ying, Z., Roberts, C. K. & Gómez-Pinilla, F. A  
4862 high-fat, refined sugar diet reduces hippocampal brain-derived neurotrophic factor,

4863 neuronal plasticity, and learning. *Neuroscience* **112**, 803–814 (2002).

4864 95. Graber, T. G., Borack, M. S., Reidy, P. T., Volpi, E. & Rasmussen, B. B.  
4865 Essential amino acid ingestion alters expression of genes associated with amino acid  
4866 sensing, transport, and mTORC1 regulation in human skeletal muscle. *Nutr. Metab.* **14**,  
4867 35 (2017).

4868 96. Hellsten, S. V., Hägglund, M. G., Eriksson, M. M. & Fredriksson, R. The  
4869 neuronal and astrocytic protein SLC38A10 transports glutamine, glutamate, and  
4870 aspartate, suggesting a role in neurotransmission. *FEBS Open Bio* **7**, 730–746 (2017).

4871 97. Tripathi, R., Hosseini, K., Arapi, V., Fredriksson, R. & Bagchi, S. SLC38A10  
4872 (SNAT10) is Located in ER and Golgi Compartments and Has a Role in Regulating  
4873 Nascent Protein Synthesis. *International Journal of Molecular Sciences* vol. 20 6265  
4874 (2019).

4875 98. Schmidt, S. *et al.* Effect of omega-3 polyunsaturated fatty acids on the  
4876 cytoskeleton: an open-label intervention study. *Lipids Health Dis.* **14**, 4 (2015).

4877 99. Zulkafli, I. S., Waddell, B. J. & Mark, P. J. Postnatal Dietary Omega-3 Fatty  
4878 Acid Supplementation Rescues Glucocorticoid-Programmed Adiposity, Hypertension,  
4879 and Hyperlipidemia in Male Rat Offspring Raised on a High-Fat Diet. *Endocrinology* vol.  
4880 154 3110–3117 (2013).

4881 100. Aqil, M., Mallik, S., Bandyopadhyay, S., Maulik, U. & Jameel, S.  
4882 Transcriptomic Analysis of mRNAs in Human Monocytic Cells Expressing the HIV-1 Nef  
4883 Protein and Their Exosomes. *Biomed Res. Int.* **2015**, (2015).

4884 101. Kirpich, I. A. *et al.* Integrated hepatic transcriptome and proteome analysis of  
4885 mice with high-fat diet-induced nonalcoholic fatty liver disease. *J. Nutr. Biochem.* **22**,  
4886 38–45 (2011).

4887 102. Li, H. *et al.* Diversification of the ADH1B gene during expansion of modern  
4888 humans. *Ann. Hum. Genet.* **75**, 497–507 (2011).

4889 103. Polimanti, R. & Gelernter, J. ADH1B: From alcoholism, natural selection, and  
4890 cancer to the human phenome. *Am. J. Med. Genet. B Neuropsychiatr. Genet.* **177**,

- 4891 113–125 (2018).
- 4892 104. Zhong, X. *et al.* The zinc-finger protein ZFYVE1 modulates TLR3-mediated  
4893 signaling by facilitating TLR3 ligand binding. *Cell. Mol. Immunol.* **17**, 741–752 (2020).
- 4894 105. Yang, Y. *et al.* The RNA-binding protein Mex3B is a coreceptor of Toll-like  
4895 receptor 3 in innate antiviral response. *Cell Res.* **26**, 288–303 (2016).
- 4896 106. Kim, S. V. *et al.* GPR15-mediated homing controls immune homeostasis in  
4897 the large intestine mucosa. *Science* **340**, 1456–1459 (2013).
- 4898 107. Nguyen, L. P. *et al.* Role and species-specific expression of colon T cell  
4899 homing receptor GPR15 in colitis. *Nature Immunology* vol. 16 207–213 (2015).
- 4900 108. Monteleone, G., Boirivant, M., Pallone, F. & MacDonald, T. T. TGF- $\beta$ 1 and  
4901 Smad7 in the regulation of IBD. *Mucosal Immunology* vol. 1 S50–S53 (2008).
- 4902 109. Kennedy, B. W. C. Mongersen, an Oral SMAD7 Antisense Oligonucleotide,  
4903 and Crohn’s Disease. *The New England journal of medicine* vol. 372 2461 (2015).
- 4904 110. Garo, L. P. *et al.* Smad7 Controls Immunoregulatory PDL2/1-PD1 Signaling in  
4905 Intestinal Inflammation and Autoimmunity. *Cell Rep.* **28**, 3353–3366.e5 (2019).
- 4906 111. Iqbal, Z. *et al.* Homozygous SLC6A17 mutations cause autosomal-recessive  
4907 intellectual disability with progressive tremor, speech impairment, and behavioral  
4908 problems. *Am. J. Hum. Genet.* **96**, 386–396 (2015).
- 4909 112. Park, J. *et al.* KCNC1-related disorders: new de novo variants expand the  
4910 phenotypic spectrum. *Ann Clin Transl Neurol* **6**, 1319–1326 (2019).

4911 **4e) Correlation between components of variation in population**  
4912 **structure and components of variation in SNP-trait association**

4913  
4914  
4915  
4916  
4917  
4918

Alba Refoyo Martínez<sup>1</sup>, Fernando Racimo<sup>1</sup>

<sup>1</sup>Lundbeck Foundation GeoGenetics Centre, GLOBE Institute, University of Copenhagen,  
Copenhagen, Denmark



## 4919 Introduction

4920 Ancient Western and Central Eurasian populations show strong patterns of genome-wide  
4921 differentiation, which are even stronger than those observed among present-day Western  
4922 and Central Eurasians (Supplementary Note S4d). We were interested in determining  
4923 whether variants that contribute to differentiation between populations may also be  
4924 associated with complex traits. This could perhaps serve to evince the genetic component of  
4925 trait differences among these ancient populations.

4926 Recently, Tanigawa et al., 2019<sup>1</sup> developed a method (DeGAs) by which SNP-trait  
4927 associations from thousands of phenotypes could be represented in a low-dimensional  
4928 space, yielding a smaller set of latent components of genetic associations. They performed  
4929 GWAS in 337,199 White British individuals in the UK Biobank study for 2,138 phenotypes,  
4930 obtained Z-scores from each SNP and each trait, and then performed truncated singular-  
4931 value decomposition (TSVD) on the matrix of Z-scores, which yielded 100 components of  
4932 variation. The decomposition allows one to see how much a particular variant or trait  
4933 contributes to the variation explained by that component, and to rank the components by  
4934 their amount of contribution to the total variation in SNP-trait associations.

4935 By looking at these components of genetic association in the UK Biobank and comparing  
4936 them with our components of variation in ancient population structure, we can begin to  
4937 understand which sets of trait-associated variants may have been important during recent  
4938 human evolution.

## 4939 Methods

4940 We carried out a principal component analysis (PCA) on the 1,165 West-Eurasian imputed  
4941 genomes, using *pcadapt*<sup>2</sup>. At the variant level we filtered out, 1) variants with MAF < 5%, 2)  
4942 genotype missingness rate > 50% and, 3) variants with a genotype probability lower than 0.8  
4943 in more than 10% of the samples (Figure 1).

4944 Our aim is to study the correlation between our population structure components, captured in  
4945 the first two components, and the 100 components of SNP-trait associations from the  
4946 DeGAs analysis, which were obtained from <sup>1</sup>. Henceforth, we will refer to the components of  
4947 population structure from the ancient genome PCA with the label “PS” (i.e. the first principal  
4948 component is PS1, the second is PS2, etc.). We will refer to the components of trait-  
4949 association variation from Tanigawa et al., 2019<sup>1</sup> as “DG” (i.e. the first component is DG1,  
4950 the second is DG2, etc.). We applied the Pearson correlation between the loadings of the  
4951 two analyses (Figure 3).

4952 We aimed to test whether the correlations observed were significantly different from those  
4953 that would be observed under a model in which there was no association between a  
4954 particular DG component and a particular PS component. For this, we obtained p-values  
4955 using a randomization scheme. We randomised the sign of the 1000 DGs loadings  
4956 accounting for the structure of linkage disequilibrium (LD) along the genome, by dividing our  
4957 genome into 1Mb blocks and randomising the sign of all SNPs within each block in unison  
4958 recalculating the correlation with our first two components (PS1-PS2).

4959

4960 For each combination of PS<sub>x</sub> and DG<sub>y</sub> (where x and y are indices over all PS and DG  
4961 components, respectively), we obtained a P-value using the following equation:

4962

$$4963 \quad P = \frac{1 + \sum_i^N I(|cor_x^i| > |cor_x^y|)}{1 + N}$$

4964 Here,  $cor_x^y$  is the true correlation between PS<sub>x</sub> and DG<sub>y</sub>,  $cor_x^y$  is the correlation between  
4965 PS<sub>x</sub> and DG<sub>y</sub> after randomising signs,  $I()$  is an indicator function and N is the number of  
4966 randomised samples used, which was set to 1,000.

## 4967 Results

4968 We first performed a PCA on the genotypes of the 1,165 imputed ancient West-Eurasian  
4969 individuals (Supplementary Note S4d). The first component (1.8% of total variance  
4970 explained) represents a gradient separating Neolithic farmer populations from hunter-  
4971 gatherer genomes, while the second component (1.1%) captures a gradient separating  
4972 ancient East Asians, ancient Steppe populations and ancient Western Eurasians (Figure  
4973 **S4d.4**).

4974 We computed the correlation between the first 8 components of population structure and the  
4975 100 trait-association components. Figure **S4e.1** shows the distribution of all DG correlations  
4976 with the first 8 PS components (PS1 to PS8). For this analysis, we focused on PS1 and PS2.  
4977 PS1 captures a gradient separating ancient Neolithic farmers from Mesolithic hunter-  
4978 gatherer genomes. The trait components most correlated with PS1 are DG89, DG71, DG22,  
4979 DG15, DG52, DG5, DG82, DG2, DG51, DG99, DG69, DG12, DG84, DG83 and DG79  
4980 (Table XX and top four 4 in Figure **S4e.2**). These components have in common that are  
4981 driven by anthropometric and lifestyle and environmental traits, with an important  
4982 contribution from diet-related measures. They are mainly correlated with five different  
4983 broader categories: 1) lifestyle and environment, mainly representing food intake, cereal and  
4984 fruit, and time spent outdoor and sun exposure; 2) verbal interview about mental health

4985 described by worrier/anxious/nervous feelings and sleep duration; 3) impedance, body  
4986 measurement and bone mineral density; 4) lung capacity and asthma, mostly represented  
4987 by the FEV1 measure; 5) blood pressure measures, hypertension and cholesterol.

4988 PS2 separates ancient East Asian and European samples. The significant top correlations of  
4989 DG components with PS2, top four shown in Figure **S4e.3**, are DG38, DG12, DG40, DG84,  
4990 DG56, DG82, DG36, DG15, DG28. and DG68. One of them was also significant for PS1.  
4991 These components are mainly driven by anthropometric measures and cardiovascular  
4992 measurement and disorders. They can be classified into the same categories previously  
4993 described. The main difference with PS1 is that more components are mainly explained by  
4994 the lifestyle and environmental relation and impedance measure while in PS2, blood  
4995 pressure and cardiovascular disorders and skin-sun exposure relation have higher  
4996 contributions.

4997 We computed p-values using two randomization schemes to test whether these correlations  
4998 were significantly different from zero. The first test relies on the randomization of the sign of  
4999 the loadings before calculating the correlations between the loadings representing  
5000 components of structure and the loadings from the DeGAs analysis. We first divided the  
5001 genome into 5Mb blocks and then randomised the signs of the SNPs in each block in the  
5002 same direction, to account for LD. We also use a bootstrapping approach also dividing the  
5003 genome into blocks.

5004 We observe there are 22 significant correlations with PS1 while there are 7 significant  
5005 correlations with PS2. Significant p-values for the block-based randomization for PS1 and  
5006 PS2 are shown in **Table S4e.1 and Table S4e.2** respectively.

## 5007 Discussion

5008 Among the significantly PS1-associated trait components, there are many components  
5009 involving traits related to lifestyle and environment: eg. water intake, cereal intake and time  
5010 spent outdoors. This signal may perhaps be related to differences in diet and lifestyle  
5011 between ancient hunter-gatherers and farmers<sup>3,4</sup>. We also find traits related to  
5012 haematological measurements, forced expiratory volume (see also Supplementary Note  
5013 S4d), body fat, anxiety and hypertension, among others.

5014

5015 However, we should also keep in mind that population stratification in the original UK  
5016 Biobank dataset may affect these results. For example, if present-day British individuals with  
5017 different amounts of Neolithic farmer ancestry happen to live in different areas of Britain with  
5018 markedly different lifestyles, one could presume that a spurious signal of correlation between

5019 those lifestyle differences and amount of Neolithic ancestry could be generated. Indeed,  
5020 while non-significant, we find that some of the trait association components that are most  
5021 correlated with PS1 have to do with lifestyle and environmental traits such as tea intake, and  
5022 mental health, and these may, in turn, may be correlated with variation in PS1 in present-day  
5023 British people (due, perhaps, to more recent immigrants from Asia in urban settings, for  
5024 example).

5025

5026 The strongest DG correlations with the first two PCs performed on the European populations  
5027 from the 1000 Genomes Project (FIN, CEU, GBR, TSI and IBS) are quite different to the  
5028 ones with the ancient samples. Only DG52, which is mainly explained by asthma and bone  
5029 mineral density traits, is shared with the West-Eurasian study. The first component, which  
5030 separates Finnish from the other European populations, is strongly correlated with those  
5031 DGs in which haematological measurements contribute between 40-92% (Table S4e.3). The  
5032 second component, that separates the British and Utah residents (CEPH) with Northern and  
5033 Western European ancestry from the Southern European and Finnish populations. This  
5034 component is correlated with DG components in which spirometry traits that measure lung  
5035 capacity, lifestyle and environment, such as water, coffee and tea intake, and body  
5036 measurement and impedance traits, are the ones contributing most (Table S4e.4).

5037

## 5038 Figures

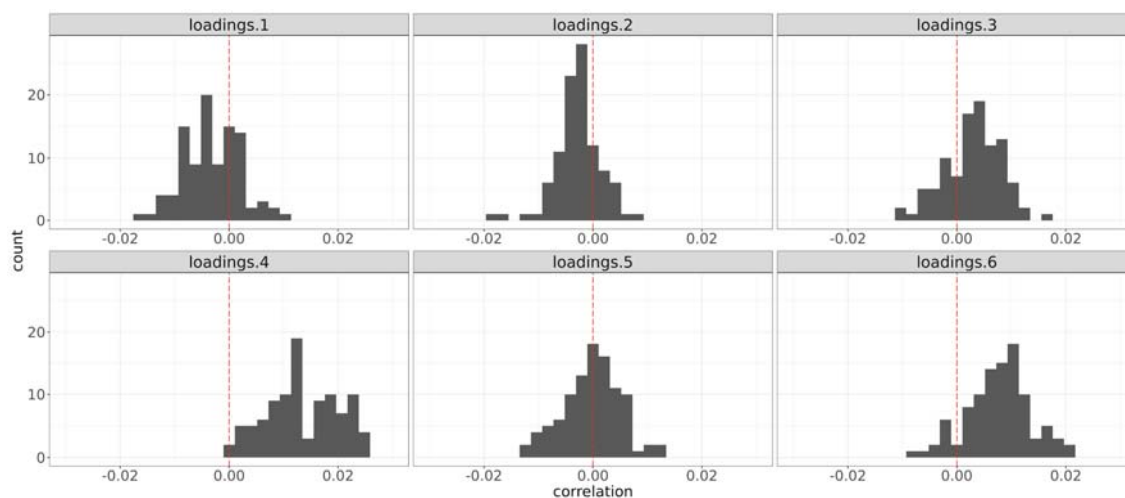

5039

5040

5041 **Figure S4e.1. Pearson correlation between the 6 loadings from the PCA analysis (PS1-**  
5042 **PS6) and the 100 loadings from the DeGAs analysis (DG1-DG100).**

5043

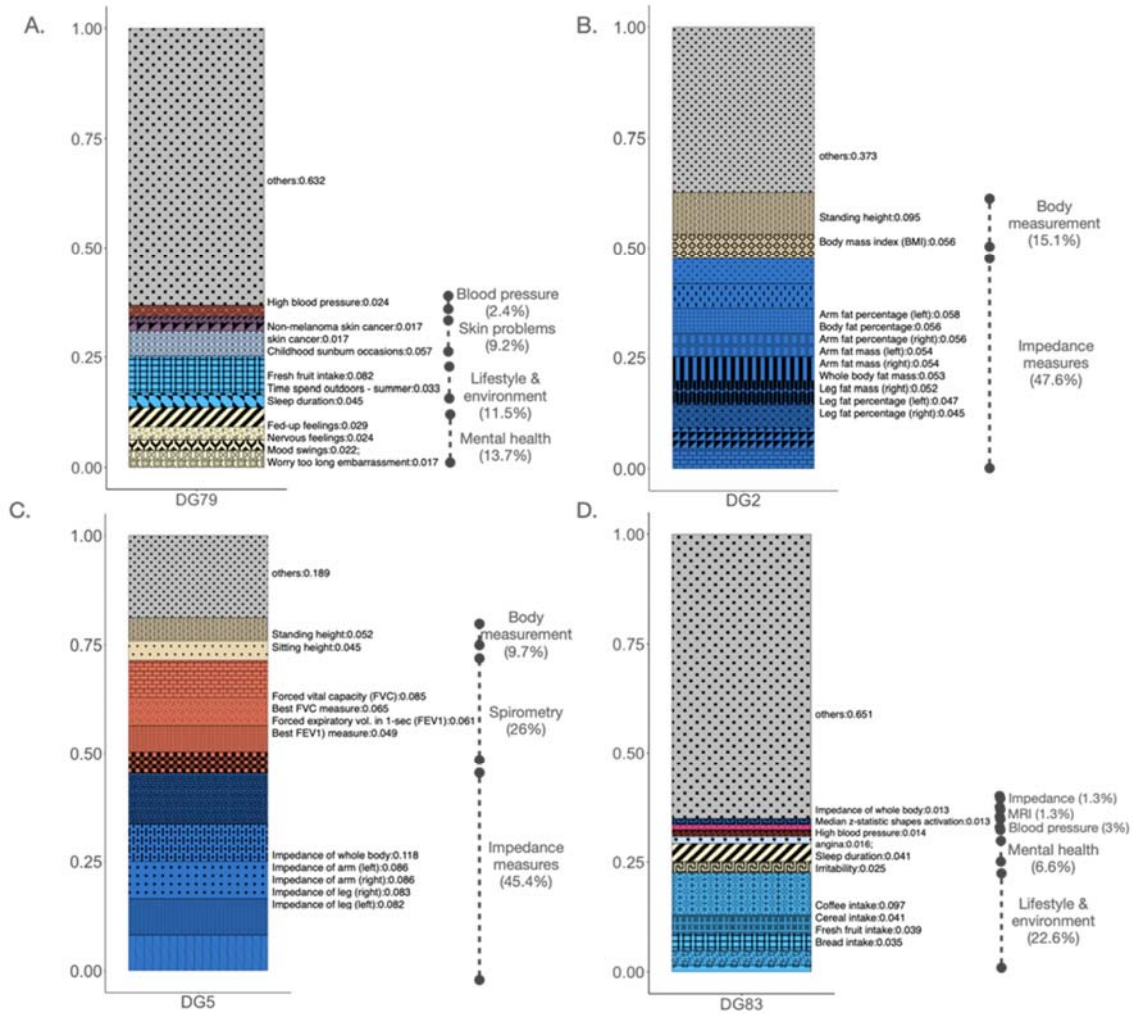

5044

5045 **Figure S4e.2. PS1.** Top 4 UK Biobank trait-association components from DeGAs that have  
 5046 the highest correlation ( $P < 5e-3$ ) with the principal component separating ancient farmer  
 5047 hunter-gatherer populations

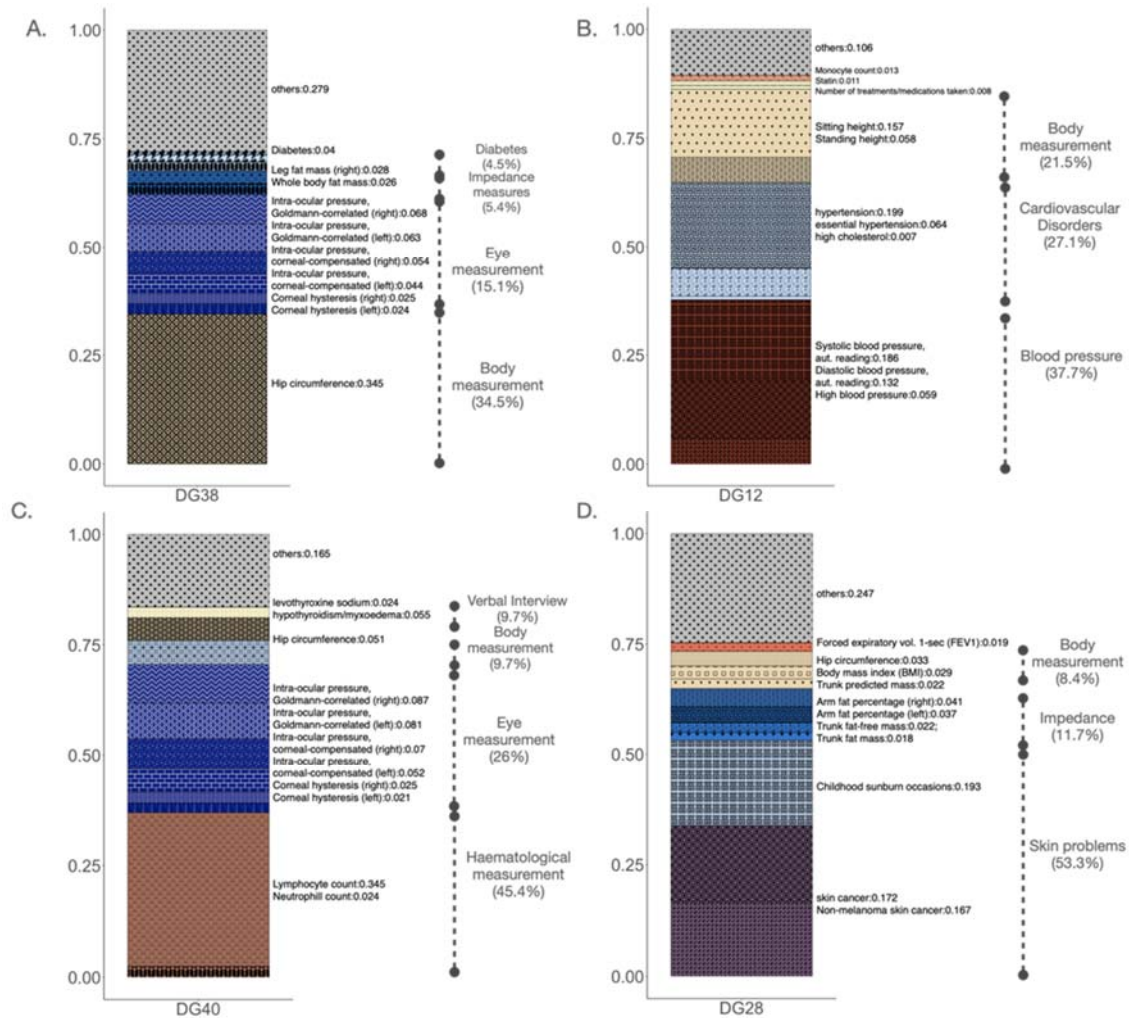

5048

5049 **Figure S4e.3. PS2.** Top 4 UK Biobank trait-association components from DeGAs that have  
 5050 the highest correlation ( $P < 5e-3$ ) with the principal component separating East Asian and  
 5051 European samples.

5052

5053

| Neolithic farmer vs. hunter-gatherer genomes gradient |             |         |                                                                                                                                                                  |                                                                                                                                                                                                                                                                                                                                                                                                                                                             |
|-------------------------------------------------------|-------------|---------|------------------------------------------------------------------------------------------------------------------------------------------------------------------|-------------------------------------------------------------------------------------------------------------------------------------------------------------------------------------------------------------------------------------------------------------------------------------------------------------------------------------------------------------------------------------------------------------------------------------------------------------|
| D G                                                   | Correlation | P-value | contribution_category                                                                                                                                            | contribution_phenotypes                                                                                                                                                                                                                                                                                                                                                                                                                                     |
| 79                                                    | -0.017      | 0.001   | others:0.632; Blood pressure:0.024; Cancer:0.034; Non-cancer Illness:0.057; Lifestyle and environment:0.115; Verbal Interview:0.137                              | others:0.632; High blood pressure:0.024; Non-melanoma skin cancer:0.017; skin cancer:0.017; Childhood sunburn occasions:0.057; Fresh fruit intake:0.082; Time spend outdoors in summer:0.033; Sleep duration:0.045; Fed-up feelings:0.029; Nervous feelings:0.024; Mood swings:0.022; Worry too long after embarrassment:0.017                                                                                                                              |
| 2                                                     | -0.014      | 0.001   | others:0.373; Body measurement:0.151; Impedance measures:0.476                                                                                                   | others:0.373; Standing height:0.095; Body mass index (BMI):0.056; Arm fat percentage (left):0.058; Body fat percentage:0.056; Arm fat percentage (right):0.056; Arm fat mass (left):0.054; Arm fat mass (right):0.054; Whole body fat mass:0.053; Leg fat mass (right):0.052; Leg fat percentage (left):0.047; Leg fat percentage (right):0.045                                                                                                             |
| 5                                                     | -0.013      | 0.003   | others:0.189; Body measurement:0.097; Spirometry:0.26; Impedance measures:0.454                                                                                  | others:0.189; Standing height:0.052; Sitting height:0.045; Forced vital capacity (FVC):0.085; Forced vital capacity (FVC), Best measure:0.065; Forced expiratory volume in 1-second (FEV1):0.061; Forced expiratory volume in 1-second (FEV1), Best measure:0.049; Impedance of whole body:0.118; Impedance of arm (left):0.086; Impedance of arm (right):0.086; Impedance of leg (right):0.083; Impedance of leg (left):0.082                              |
| 83                                                    | -0.013      | 0.003   | others:0.651; Impedance measures:0.013; Brain MRI:0.013; Blood pressure:0.014; Non-cancer Illness:0.016; Verbal Interview:0.066; Lifestyle and environment:0.226 | others:0.651; Impedance of whole body:0.013; Median z-statistic (in group-defined mask) for shapes activation:0.013; High blood pressure:0.014; angina:0.016; Sleep duration:0.041; Irritability:0.025; Coffee intake:0.097; Cereal intake:0.041; Fresh fruit intake:0.039; Bread intake:0.035; Water intake:0.015                                                                                                                                          |
| 71                                                    | -0.012      | 0.003   | others:0.506; Non-cancer Illness:0.041; Hematological measurement:0.073; Verbal Interview:0.108; Lifestyle and environment:0.273                                 | others:0.506; cholelithiasis/gall stones:0.024; cholecystitis:0.017; Monocyte percentage:0.036; Eosinophill percentage:0.02; Eosinophill count:0.016; <b>Number of treatments/medications taken:0.108; Fresh fruit intake:0.104; Time spend outdoors in summer:0.074;</b> Tea intake:0.045; Time spent outdoors in winter:0.033; Coffee intake:0.016                                                                                                        |
| 89                                                    | -0.012      | 0.005   | others:0.58; Arterial stiffness:0.034; Spirometry:0.061; Lifestyle and environment:0.067; Non-cancer Illness:0.077; Verbal Interview:0.181                       | others:0.58; Pulse wave peak to peak time:0.017; Pulse wave Arterial Stiffness index:0.017; <b>Forced expiratory volume in 1-second (FEV1), predicted percentage:0.061;</b> Average weekly beer plus cider intake:0.067; <b>hypertension:0.042; essential hypertension:0.035; Worrier/anxious feelings:0.053; Sleep duration:0.053; Fed-up feelings:0.033;</b> Age at menopause (last menstrual period):0.022; Number of treatments/medications taken:0.021 |

|    |        |         |                                                                                                                                                                                                                |                                                                                                                                                                                                                                                                                                                                                                                                                                                                                                                                                                                                                                                      |
|----|--------|---------|----------------------------------------------------------------------------------------------------------------------------------------------------------------------------------------------------------------|------------------------------------------------------------------------------------------------------------------------------------------------------------------------------------------------------------------------------------------------------------------------------------------------------------------------------------------------------------------------------------------------------------------------------------------------------------------------------------------------------------------------------------------------------------------------------------------------------------------------------------------------------|
| 22 | 0.014  | 0.00999 | others:0.225; Hematological measurement:0.018; Impedance measures:0.029; Blood pressure:0.083; Non-cancer illness:0.317; Verbal Interview:0.329                                                                | others:0.225; Neutrophil count:0.018; Impedance of arm (left):0.016; Leg fat percentage (right):0.013; Systolic blood pressure, automated reading:0.03; Diastolic blood pressure, automated reading:0.026; Pulse rate, automated reading:0.026; <b>high cholesterol:0.303</b> ; Alzheimer's disease/dementia:0.014; <b>Statin:0.237</b> ; simvastatin:0.062; atorvastatin:0.03                                                                                                                                                                                                                                                                       |
| 99 | -0.01  | 0.01698 | others:0.63; Spirometry:0.032; Lifestyle and environment:0.061; Impedance measures:0.067; Verbal Interview:0.087; Eye measurement:0.122                                                                        | others:0.63; Forced expiratory volume in 1-second (FEV1), predicted percentage:0.032; Average weekly beer plus cider intake:0.061; Impedance of arm (left):0.041; Impedance of arm (right):0.026; Age started wearing glasses or contact lenses:0.071; Seen doctor (GP) for nerves, anxiety, tension or depression:0.016; logMAR in round (left):0.039; logMAR, initial (left):0.027; logMAR, final (left):0.024; Corneal resistance factor (left):0.017; Corneal hysteresis (right):0.015                                                                                                                                                           |
| 80 | -0.01  | 0.01698 | others:0.652; Hematological measurement:0.017; Non-cancer illness:0.017; Sex-specific factors:0.021; Lifestyle and environment:0.046; Verbal Interview:0.053; Impedance measures:0.061; Body measurement:0.131 | others:0.652; Monocyte percentage:0.017; hypertension:0.017; Birth weight of first child:0.021; Water intake:0.027; Coffee intake:0.019; Worrier/anxious feelings:0.02; gout:0.018; Sleep duration:0.015; Arm predicted mass (left):0.032; Arm fat-free mass (left):0.029; Weight:0.131                                                                                                                                                                                                                                                                                                                                                              |
| 69 | -0.01  | 0.02198 | others:0.529; Blood pressure:0.038; Impedance measures:0.068; Body measurement:0.089; Hematological measurement:0.132; Lifestyle and environment:0.144                                                         | others:0.529; High blood pressure:0.038; Impedance of whole body:0.045; Impedance of arm (right):0.023; Body mass index (BMI):0.062; Weight:0.027; Monocyte percentage:0.11; Eosinophil percentage:0.022; Cereal intake:0.047; Water intake:0.034; Time spend outdoors in summer:0.033; Time spent outdoors in winter:0.029                                                                                                                                                                                                                                                                                                                          |
| 77 | -0.009 | 0.01798 | others:0.748; Urine assays:0.042; Lifestyle and environment:0.043; Verbal Interview:0.049; Brain MRI:0.118                                                                                                     | others:0.748; Sodium in urine:0.042; Fresh fruit intake:0.043; Sleep duration:0.028; Number of treatments/medications taken:0.021; Weighted-mean FA in tract superior longitudinal fasciculus (right):0.022; Weighted-mean FA in tract superior longitudinal fasciculus (left):0.019; Mean FA in superior longitudinal fasciculus on FA skeleton (right):0.019; Weighted-mean MD in tract anterior thalamic radiation (right):0.018; Weighted-mean MD in tract anterior thalamic radiation (left):0.015; Weighted-mean L1 in tract anterior thalamic radiation (left):0.013; Mean FA in superior longitudinal fasciculus on FA skeleton (left):0.012 |
| 22 | 0.009  | 0.01898 | others:0.225; Hematological measurement:0.018; Impedance measures:0.029; Blood pressure:0.083; Non-cancer illness:0.317; Verbal Interview:0.329                                                                | others:0.225; Neutrophil count:0.018; Impedance of arm (left):0.016; Leg fat percentage (right):0.013; Systolic blood pressure, automated reading:0.03; Diastolic blood pressure, automated reading:0.026; Pulse rate, automated reading:0.026; high cholesterol:0.303; Alzheimer's disease/dementia:0.014; <b>Statin:0.237</b> ; simvastatin:0.062; atorvastatin:0.03                                                                                                                                                                                                                                                                               |
| 90 | -0.009 | 0.03197 | others:0.631; Impedance measures:0.021; Eye                                                                                                                                                                    | others:0.631; Impedance of arm (right):0.021; logMAR in round (left):0.027; Creatinine (enzymatic) in urine:0.027; Nucleated red blood cell percentage:0.03;                                                                                                                                                                                                                                                                                                                                                                                                                                                                                         |



|        |        |             |                                                                                                                                                                 |                                                                                                                                                                                                                                                                                                                                                                                                                                                                                                                                                                                                                  |
|--------|--------|-------------|-----------------------------------------------------------------------------------------------------------------------------------------------------------------|------------------------------------------------------------------------------------------------------------------------------------------------------------------------------------------------------------------------------------------------------------------------------------------------------------------------------------------------------------------------------------------------------------------------------------------------------------------------------------------------------------------------------------------------------------------------------------------------------------------|
|        |        |             | measurement:0.027; Urine assays:0.027; Blood pressure:0.03; Spirometry:0.034; Non-cancer illness:0.057; Verbal Interview:0.075; Lifestyle and environment:0.098 | Forced expiratory volume in 1-second (FEV1), predicted percentage:0.034; Childhood sunburn occasions:0.034; essential hypertension:0.022; Number of treatments/medications taken:0.05; Irritability:0.025; Fresh fruit intake:0.05; Bread intake:0.048                                                                                                                                                                                                                                                                                                                                                           |
| 7<br>5 | -0.009 | 0.0279<br>7 | others:0.509; Verbal Interview:0.071; Non-cancer illness:0.084; Hematological measurement:0.107; Impedance measures:0.108; Lifestyle and environment:0.12       | others:0.509; Number of treatments/medications taken:0.071; Alzheimer's disease/dementia:0.061; essential hypertension:0.023; Monocyte percentage:0.088; Monocyte count:0.019; Whole body water mass:0.041; Whole body fat-free mass:0.04; Basal metabolic rate:0.027; Fresh fruit intake:0.048; Time spend outdoors in summer:0.043; Time spent outdoors in winter:0.029                                                                                                                                                                                                                                        |
| 5<br>1 | 0.011  | 0.0389<br>6 | others:0.425; Verbal Interview:0.024; DXA assessment:0.26; Non-cancer illness:0.291                                                                             | others:0.425; Wheeze or whistling in the chest in last year:0.024; Femur total BMD (bone mineral density) (left):0.038; Femur total BMD (bone mineral density) T-score (left):0.035; Femur total BMD (bone mineral density) (right):0.033; Femur total BMD (bone mineral density) T-score (right):0.031; Femur troch BMD (bone mineral density) (left):0.028; Femur troch BMD (bone mineral density) (right):0.026; Femur shaft BMD (bone mineral density) (left):0.024; Femur troch BMD (bone mineral density) T-score (left):0.023; Femur troch BMD (bone mineral density) T-score (right):0.021; asthma:0.291 |
| 6<br>1 | -0.009 | 0.0379<br>6 | others:0.612; Urine assays:0.016; Lifestyle and environment:0.049; Impedance measures:0.055; Body measurement:0.127; Spirometry:0.14                            | others:0.612; Sodium in urine:0.016; Water intake:0.036; Time spend outdoors in summer:0.013; Leg fat mass (right):0.027; Arm fat percentage (right):0.015; Trunk fat percentage:0.013; Body mass index (BMI):0.063; Weight:0.035; Waist circumference:0.028; Peak expiratory flow (PEF):0.11; Forced expiratory volume in 1-second (FEV1):0.03                                                                                                                                                                                                                                                                  |
| 8<br>2 | -0.012 | 0.0409<br>6 | others:0.641; Urine assays:0.027; Body measurement:0.073; Lifestyle and environment:0.078; Impedance measures:0.09; Verbal Interview:0.092                      | others:0.641; Creatinine (enzymatic) in urine:0.027; Hand grip strength (right):0.038; Hand grip strength (left):0.035; Tea intake:0.063; Water intake:0.015; Impedance of leg (left):0.035; Impedance of leg (right):0.022; Trunk fat mass:0.017; Trunk fat mass:0.017; Sleep duration:0.066; Nervous feelings:0.026                                                                                                                                                                                                                                                                                            |
| 5<br>2 | 0.013  | 0.0229<br>8 | others:0.538; Verbal Interview:0.019; Impedance measures:0.027; DXA assessment:0.171; Non-cancer illness:0.245                                                  | others:0.538; Wheeze or whistling in the chest in last year:0.019; Impedance of whole body:0.027; Femur total BMD (bone mineral density) (left):0.027; Femur total BMD (bone mineral density) T-score (left):0.025; Femur total BMD (bone mineral density) (right):0.024; Femur total BMD (bone mineral density) T-score (right):0.022; Femur troch BMD (bone mineral density) (left):0.02; Femur troch BMD (bone mineral density) (right):0.019; Femur shaft BMD (bone mineral density) (left):0.017; Femur troch BMD (bone mineral density) T-score (left):0.016; asthma:0.245                                 |
| 6<br>8 | -0.01  | 0.0479<br>5 | others:0.697; Verbal Interview:0.015; Hematological measurement:0.022; Impedance measures:0.036; Lifestyle and                                                  | others:0.697; Long-standing illness, disability or infirmity:0.015; Monocyte percentage:0.022; Leg fat-free mass (left):0.018; Leg predicted mass (left):0.018; Tea intake:0.037; High blood pressure:0.061; Alzheimer's                                                                                                                                                                                                                                                                                                                                                                                         |

|           |        |         |                                                                                                                                              |                                                                                                                                                                                                                                                                                                                                                                                                                                                                   |
|-----------|--------|---------|----------------------------------------------------------------------------------------------------------------------------------------------|-------------------------------------------------------------------------------------------------------------------------------------------------------------------------------------------------------------------------------------------------------------------------------------------------------------------------------------------------------------------------------------------------------------------------------------------------------------------|
|           |        |         | environment:0.037; Blood pressure:0.061; Non-cancer illness:0.132                                                                            | disease/dementia:0.038; cholelithiasis/gall stones:0.03; hypertension:0.03; cholecystitis:0.019; Childhood sunburn occasions:0.015                                                                                                                                                                                                                                                                                                                                |
| <b>84</b> | -0.015 | 0.004   | others:0.648; Urine assays:0.051; Blood pressure:0.07; Verbal Interview:0.077; Lifestyle and environment:0.154                               | others:0.648; Creatinine (enzymatic) in urine:0.035; Potassium in urine:0.016; High blood pressure:0.07; Sleep duration:0.022; <b>Fed-up feelings:0.02; Worrier/anxious feelings:0.019; Nervous feelings:0.017; Tea intake:0.072; Time spend outdoors in summer:0.042; Coffee intake:0.022; Time spent outdoors in winter:0.018</b>                                                                                                                               |
| <b>46</b> | -0.011 | 0.01499 | others:0.096; Body measurement:0.045; Non-cancer illness:0.055; Blood pressure:0.181; Spirometry:0.219; Verbal Interview:0.406               | others:0.096; Waist circumference:0.045; diabetes:0.02; Diabetes diagnosed by doctor:0.018; Diabetes:0.017; Diastolic blood pressure, automated reading:0.111; Systolic blood pressure, automated reading:0.07; Forced vital capacity (FVC):0.069; Forced vital capacity (FVC), Best measure:0.066; Forced expiratory volume in 1-second (FEV1), Best measure:0.061; Forced expiratory volume in 1-second (FEV1):0.023; Age when periods started (menarche):0.406 |
| <b>70</b> | -0.008 | 0.03896 | others:0.57; Body measurement:0.033; Urine assays:0.047; Non-cancer illness:0.053; Impedance measures:0.135; Lifestyle and environment:0.162 | others:0.57; Weight:0.033; Sodium in urine:0.047; Childhood sunburn occasions:0.026; Alzheimer's disease/dementia:0.026; Impedance of leg (right):0.037; Impedance of leg (left):0.028; Arm predicted mass (left):0.026; Arm fat-free mass (left):0.023; Arm predicted mass (right):0.021; Cereal intake:0.111; Water intake:0.051                                                                                                                                |

5054

5055

5056

**Table S4e.1.** Significant correlations between DG components with PS1 1) randomising the sign of each block of 5Mb in the DG loadings and bootstrapping the same blocks.

| <b>Ancient East Asians, ancient Steppe populations and ancient Western Eurasians gradient</b> |                    |                |                                                                                                                                                       |                                                                                                                                                                                                                                                                                                                                                                                                                                                                                          |
|-----------------------------------------------------------------------------------------------|--------------------|----------------|-------------------------------------------------------------------------------------------------------------------------------------------------------|------------------------------------------------------------------------------------------------------------------------------------------------------------------------------------------------------------------------------------------------------------------------------------------------------------------------------------------------------------------------------------------------------------------------------------------------------------------------------------------|
| <b>D G</b>                                                                                    | <b>Correlation</b> | <b>P-value</b> | <b>contribution_category</b>                                                                                                                          | <b>contribution_phenotypes</b>                                                                                                                                                                                                                                                                                                                                                                                                                                                           |
| <b>38</b>                                                                                     | -0.024             | 0.001          | others:0.279; Non-cancer illness:0.045; Impedance measures:0.054; <b>Eye measurement:0.277; Body measurement:0.345</b>                                | others:0.279; diabetes:0.024; Diabetes:0.02; Leg fat mass (right):0.028; Whole body fat mass:0.026; Intra-ocular pressure, Goldmann-correlated (right):0.068; Intra-ocular pressure, Goldmann-correlated (left):0.063; Intra-ocular pressure, corneal-compensated (right):0.054; Intra-ocular pressure, corneal-compensated (left):0.044; Corneal hysteresis (right):0.025; Corneal hysteresis (left):0.024; <b>Hip circumference:0.345</b>                                              |
| <b>12</b>                                                                                     | -0.024             | 0.001          | others:0.106; Hematological measurement:0.013; Verbal Interview:0.019; Body measurement:0.215; <b>Non-cancer illness:0.271; Blood pressure:0.377</b>  | others:0.106; Monocyte count:0.013; Statin:0.011; Number of treatments/medications taken:0.008; Sitting <b>height</b> :0.157; Standing height:0.058; <b>hypertension</b> :0.199; essential hypertension:0.064; high cholesterol:0.007; Systolic <b>blood pressure</b> , automated reading:0.186; Diastolic blood pressure, automated reading:0.132; High blood pressure:0.059                                                                                                            |
| <b>40</b>                                                                                     | -0.015             | 0.00799        | others:0.165; Verbal Interview:0.024; Body measurement:0.051; Non-cancer illness:0.055; <b>Eye measurement:0.336; Hematological measurement:0.369</b> | others:0.165; levothyroxine sodium:0.024; Hip circumference:0.051; hypothyroidism/myxoedema:0.055; Intra-ocular pressure, Goldmann-correlated (right):0.087; Intra-ocular pressure, Goldmann-correlated (left):0.081; Intra-ocular pressure, corneal-compensated (right):0.07; Intra-ocular pressure, corneal-compensated (left):0.052; Corneal hysteresis (right):0.025; Corneal hysteresis (left):0.021; Lymphocyte count:0.345; Neutrophill count:0.024                               |
| <b>28</b>                                                                                     | -0.01              | 0.001          | others:0.247; Spirometry:0.019; Body measurement:0.084; Impedance measures:0.117; Non-cancer illness:0.193; <b>skin Cancer</b> :0.339                 | others:0.247; Forced expiratory volume in 1-second (FEV1), predicted:0.019; Hip circumference:0.033; Body mass index (BMI):0.029; Trunk predicted mass:0.022; Arm fat percentage (right):0.041; Arm fat percentage (left):0.037; Trunk fat-free mass:0.022; Trunk fat mass:0.018; Childhood sunburn occasions:0.193; skin cancer:0.172; Non-melanoma skin cancer:0.167                                                                                                                   |
| <b>23</b>                                                                                     | -0.009             | 0.02897        | others:0.061; Hematological measurement:0.011; Non-cancer illness:0.014; Cancer:0.02; Local environment:0.894                                         | others:0.061; Immature reticulocyte fraction:0.011; Childhood sunburn occasions:0.014; skin cancer:0.01; Non-melanoma skin cancer:0.01; Nitrogen dioxide air pollution; 2010:0.176; Nitrogen dioxide air pollution; 2007:0.171; Nitrogen dioxide air pollution; 2006:0.167; Nitrogen dioxide air pollution; 2005:0.152; Nitrogen oxides air pollution; 2010:0.113; Particulate matter air pollution (pm2.5); 2010:0.091; Particulate matter air pollution (pm2.5) absorbance; 2010:0.024 |
| <b>24</b>                                                                                     | -0.009             | 0.04296        | others:0.056; Body measurement:0.022; Hematological measurement:0.922                                                                                 | others:0.056; Hand grip strength (left):0.012; Hand grip strength (right):0.011; Immature reticulocyte fraction:0.325; Reticulocyte count:0.234; High light scatter reticulocyte percentage:0.142; Reticulocyte percentage:0.121; High light scatter reticulocyte count:0.051; Neutrophill count:0.028; White blood cell (leukocyte) count:0.01; Red blood cell (erythrocyte) count:0.007; Lymphocyte count:0.004                                                                        |

|    |        |       |                                                                                                                |                                                                                                                                                                                                                                                                                                                                                   |
|----|--------|-------|----------------------------------------------------------------------------------------------------------------|---------------------------------------------------------------------------------------------------------------------------------------------------------------------------------------------------------------------------------------------------------------------------------------------------------------------------------------------------|
| 84 | -0.015 | 0.004 | others:0.648; Urine assays:0.051; Blood pressure:0.07; Verbal Interview:0.077; Lifestyle and environment:0.154 | others:0.648; Creatinine (enzymatic) in urine:0.035; Potassium in urine:0.016; High blood pressure:0.07; Sleep duration:0.022; <b>Fed-up feelings:0.02;</b> <b>Worrier/anxious feelings:0.019; Nervous feelings:0.017; Tea intake:0.072;</b> <b>Time spend outdoors in summer:0.042; Coffee intake:0.022; Time spent outdoors in winter:0.018</b> |
|----|--------|-------|----------------------------------------------------------------------------------------------------------------|---------------------------------------------------------------------------------------------------------------------------------------------------------------------------------------------------------------------------------------------------------------------------------------------------------------------------------------------------|

5058

5059 **Table S4e.2.** Significant correlations between DG components with PS2 1) randomising the sign of each block of 5Mb in the DG loadings and  
5060 bootstrapping the same blocks

5061  
5062  
5063

| 1000 GP – FIN vs other European populations gradient. |             |         |                                                                                                                                |                                                                                                                                                                                                                                                                                                                                                                                                                                                                   |
|-------------------------------------------------------|-------------|---------|--------------------------------------------------------------------------------------------------------------------------------|-------------------------------------------------------------------------------------------------------------------------------------------------------------------------------------------------------------------------------------------------------------------------------------------------------------------------------------------------------------------------------------------------------------------------------------------------------------------|
| DG                                                    | Correlation | P-value | contribution_category                                                                                                          | contribution_phenotypes                                                                                                                                                                                                                                                                                                                                                                                                                                           |
| 46                                                    | -0.011      | 0.01499 | others:0.096; Body measurement:0.045; Non-cancer illness:0.055; Blood pressure:0.181; Spirometry:0.219; Verbal Interview:0.406 | others:0.096; Waist circumference:0.045; diabetes:0.02; Diabetes diagnosed by doctor:0.018; Diabetes:0.017; Diastolic blood pressure, automated reading:0.111; Systolic blood pressure, automated reading:0.07; Forced vital capacity (FVC):0.069; Forced vital capacity (FVC), Best measure:0.066; Forced expiratory volume in 1-second (FEV1), Best measure:0.061; Forced expiratory volume in 1-second (FEV1):0.023; Age when periods started (menarche):0.406 |
| 27                                                    | 0.009       | 0.02498 | others:0.093; Hematological measurement:0.907                                                                                  | others:0.093; Mean platelet (thrombocyte) volume:0.408; Neutrophil count:0.11; Red blood cell (erythrocyte) count:0.096; Platelet distribution width:0.052; Haemoglobin concentration:0.05; Red blood cell (erythrocyte) distribution width:0.041; Haematocrit percentage:0.037; Mean corpuscular haemoglobin concentration:0.036; Mean corpuscular haemoglobin:0.034; Monocyte percentage:0.025; Lymphocyte percentage:0.018                                     |
| 20                                                    | 0.009       | 0.03996 | others:0.189; Verbal Interview:0.016; Non-cancer illness:0.022; Impedance measures:0.051; Hematological measurement:0.723      | others:0.189; Statin:0.016; high cholesterol:0.022; Leg fat percentage (right):0.027; Leg fat percentage (left):0.024; Neutrophil count:0.353; White blood cell (leukocyte) count:0.13; Red blood cell (erythrocyte) count:0.068; Monocyte count:0.064; Monocyte percentage:0.038; Mean platelet (thrombocyte) volume:0.037; Immature reticulocyte fraction:0.033                                                                                                 |
| 24                                                    | -0.009      | 0.04296 | others:0.056; Body measurement:0.022; Hematological measurement:0.922                                                          | others:0.056; Hand grip strength (left):0.012; Hand grip strength (right):0.011; Immature reticulocyte fraction:0.325; Reticulocyte count:0.234; High light scatter reticulocyte percentage:0.142; Reticulocyte percentage:0.121; High light scatter reticulocyte count:0.051; Neutrophil count:0.028; White blood cell (leukocyte) count:0.01; Red blood cell (erythrocyte) count:0.007; Lymphocyte count:0.004                                                  |

5064  
5065  
5066  
5067

**Table S4e.3.** Significant correlations between DG components with PS1 of European population in 1000 Genomes Project 1) randomising the sign of each block of 5Mb in the DG loadings and bootstrapping the same blocks.

**1000 GP – FIN and Southern Europeans vs Northern populations gradient.**

| D<br>G | Correl<br>ation | P-<br>valu<br>e | contribution_category                                                                                                                                                                                      | contribution_phenotypes                                                                                                                                                                                                                                                                                                                                                                                                                                                                                                                                                                 |
|--------|-----------------|-----------------|------------------------------------------------------------------------------------------------------------------------------------------------------------------------------------------------------------|-----------------------------------------------------------------------------------------------------------------------------------------------------------------------------------------------------------------------------------------------------------------------------------------------------------------------------------------------------------------------------------------------------------------------------------------------------------------------------------------------------------------------------------------------------------------------------------------|
| 4<br>6 | -0.014          | 0.00<br>2       | others:0.096; Body measurement:0.045; Non-cancer Illness:0.055; Blood pressure:0.181; Spirometry:0.219; <b>Verbal Interview:0.406</b>                                                                      | others:0.096; Waist circumference:0.045; diabetes:0.02; Diabetes diagnosed by doctor:0.018; Diabetes:0.017; Diastolic blood pressure, automated reading:0.111; Systolic blood pressure, automated reading:0.07; Forced vital capacity (FVC):0.069; Forced vital capacity (FVC), Best measure:0.066; Forced expiratory volume in 1-second (FEV1), Best measure:0.061; Forced expiratory volume in 1-second (FEV1):0.023; Age when periods started (menarche):0.406                                                                                                                       |
| 4<br>5 | -0.014          | 0.00<br>3       | others:0.099; Non-cancer Illness:0.008; Hematological measurement:0.014; Body measurement:0.082; Blood pressure:0.132; Verbal Interview:0.177; <b>Spirometry:0.489</b>                                     | others:0.099; asthma:0.008; Red blood cell (erythrocyte) count:0.014; Waist circumference:0.082; Diastolic blood pressure, automated reading:0.071; Systolic blood pressure, automated reading:0.061; Age when periods started (menarche):0.177; Forced vital capacity (FVC):0.141; Forced vital capacity (FVC), Best measure:0.133; Forced expiratory volume in 1-second (FEV1), Best measure:0.132; Forced expiratory volume in 1-second (FEV1):0.052; Peak expiratory flow (PEF):0.031                                                                                               |
| 9<br>6 | -0.011          | 0.01<br>798     | others:0.661; Blood pressure:0.019; Eye measurement:0.02; Spirometry:0.025; Sex-specific factors:0.027; Impedance measures:0.034; Non-cancer Illness:0.043; Verbal Interview:0.047; Body measurement:0.123 | others:0.661; Pulse rate:0.019; 6mm weak meridian (left):0.02; Forced expiratory volume in 1-second (FEV1), predicted percentage:0.025; Birth weight of first child:0.027; Impedance of arm (left):0.034; aortic dissection:0.022; aortic aneurysm:0.021; Number of treatments/medications taken:0.028; Age at menopause (last menstrual period):0.019; Hand grip strength (right):0.063; Hand grip strength (left):0.06                                                                                                                                                                |
| 3<br>0 | -0.01           | 0.01<br>099     | others:0.341; Eye measurement:0.033; Verbal Interview:0.037; Non-cancer Illness:0.076; Body measurement:0.101; Cancer:0.153; <b>Impedance measures:0.258</b>                                               | others:0.341; Spherical power (left):0.033; Neuroticism score:0.037; Childhood sunburn occasions:0.076; Body mass index (BMI):0.069; Trunk predicted mass:0.031; skin cancer:0.077; Non-melanoma skin cancer:0.076; Arm fat percentage (right):0.081; Arm fat percentage (left):0.07; Trunk fat mass:0.053; Trunk fat mass:0.053                                                                                                                                                                                                                                                        |
| 5<br>2 | -0.009          | 0.03<br>796     | others:0.538; Verbal Interview:0.019; Impedance measures:0.027; <b>DXA assessment:0.171</b> ; Non-cancer Illness:0.245                                                                                     | others:0.538; Wheeze or whistling in the chest in last year:0.019; Impedance of whole body:0.027; Femur total BMD (bone mineral density) (left):0.027; Femur total BMD (bone mineral density) T-score (left):0.025; Femur total BMD (bone mineral density) (right):0.024; Femur total BMD (bone mineral density) T-score (right):0.022; Femur troch BMD (bone mineral density) (left):0.02; Femur troch BMD (bone mineral density) (right):0.019; Femur shaft BMD (bone mineral density) (left):0.017; Femur troch BMD (bone mineral density) T-score (left):0.016; <b>asthma:0.245</b> |
| 5<br>9 | -0.009          | 0.03<br>796     | others:0.455; Urine assays:0.011; Non-cancer Illness:0.023; Brain MRI:0.046; <b>Lifestyle and environment:0.218</b> ; <b>Spirometry:0.247</b>                                                              | others:0.455; Sodium in urine:0.011; asthma:0.023; Volume of brain, grey+white:0.016; Volume of grey matter:0.016; Volume of peripheral cortical grey matter:0.014; Water intake:0.131; Tea intake:0.046; Coffee intake:0.041; Peak                                                                                                                                                                                                                                                                                                                                                     |

|     |        |         |                                                                                                                                                                                                         |                                                                                                                                                                                                                                                                                                                                                                               |
|-----|--------|---------|---------------------------------------------------------------------------------------------------------------------------------------------------------------------------------------------------------|-------------------------------------------------------------------------------------------------------------------------------------------------------------------------------------------------------------------------------------------------------------------------------------------------------------------------------------------------------------------------------|
|     |        |         |                                                                                                                                                                                                         | expiratory flow (PEF):0.175; Forced expiratory volume in 1-second (FEV1):0.049; Forced vital capacity (FVC), Best measure:0.022                                                                                                                                                                                                                                               |
| 100 | -0.008 | 0.04795 | others:0.746; Impedance measures:0.014; Hematological measurement:0.019; Urine assays:0.024; Sex-specific factors:0.027; Eye measurement:0.036; Verbal Interview:0.039; Lifestyle and environment:0.095 | others:0.746; Impedance of leg (right):0.014; Monocyte percentage:0.019; Sodium in urine:0.024; Birth weight of first child:0.027; Corneal hysteresis (left):0.019; Corneal resistance factor (right):0.017; Age started wearing glasses or contact lenses:0.039; Average weekly beer plus cider intake:0.047; Fresh fruit intake:0.02; Tea intake:0.015; Coffee intake:0.014 |

5068

5069 **Table S4e.4.** Significant correlations between DG components with PS2 of European population in 1000 Genomes Project 1) randomising the  
5070 sign of each block of 5Mb in the DG loadings and bootstrapping the same blocks.

## 5071 References

- 5072 1. Tanigawa, Y. *et al.* Components of genetic associations across 2,138 phenotypes in  
5073 the UK Biobank highlight adipocyte biology. *Nat. Commun.* **10**, 4064 (2019).
- 5074 2. Luu, K., Bazin, E. & Blum, M. G. B. pcadapt: an R package to perform genome scans  
5075 for selection based on principal component analysis. *Mol. Ecol. Resour.* **17**, 67–77  
5076 (2017).
- 5077 3. Diamond, J. & Bellwood, P. Farmers and their languages: the first expansions.  
5078 *Science* **300**, 597–603 (2003).
- 5079 4. Bowles, S. Cultivation of cereals by the first farmers was not more productive than  
5080 foraging. *Proceedings of the National Academy of Sciences* vol. 108 4760–4765 (2011).

5081  
5082

## 5083 4f) Polygenic prediction for height, eye colour and hair colour in 5084 ancient Danish samples

5085 Anders Rosengren<sup>1,2</sup>, Vivek Appadurai<sup>1,2</sup>, Andrew Schork<sup>1,4</sup>, Andrés Ingason<sup>1-3</sup>

5086

5087 <sup>1</sup>Institute of Biological Psychiatry, Mental Health Services, Copenhagen University Hospital

5088 <sup>2</sup>iPSYCH, The Lundbeck Foundation Initiative for Integrative Psychiatric Research, Aarhus

5089 <sup>3</sup>Lundbeck Foundation GeoGenetics Centre, GLOBE Institute, University of Copenhagen,

5090 Copenhagen, Denmark

5091 <sup>4</sup>Neurogenomics Division, The Translational Genomics Research Institute (TGEN), Phoenix

5092

5093 We predicted relative “genetic” height (i.e. expected increase or decrease in height  
5094 compared to the mean of the contemporary Danish population, based on common genetic  
5095 variants) as well as eye and hair colour in 100 ancient samples excavated from  
5096 archeological sites in Denmark. The estimated age of the ancient samples, all sequenced in  
5097 this study, ranged from roughly 10,500 to 3,000 years (See Figure 4 in main text).

5098

5099 The relative genetic height was calculated from summary statistics of a recent GWAS on  
5100 adult height in the UK Biobank <sup>1</sup>, using only strand-insensitive autosomal SNPs with robustly  
5101 genome-wide significant allelic effects ( $P < 1e-15$ ) with imputation info  $> 0.8$  and minor allele  
5102 frequency  $> 0.05$  in our ancient imputation genotype dataset. We excluded long-range  
5103 linkage disequilibrium (LD) regions <sup>2</sup> and used the “--clump” function in PLINK <sup>3</sup> to prune for



5104 LD ( $r^2 < 0.1$  within 10Mb window), rendering a total of 310 effect alleles. Per-sample genetic  
5105 height score was then calculated for the 100 ancient samples as well as a subset of 3,467  
5106 Danish ancestry male conscripts from a random population subset of the IPSYCH2012 case-  
5107 cohort <sup>4</sup> by summing allelic effect multiplied with the effect allele imputed dosage (Appadurai  
5108 *et al.*, in prep.) across the 310 loci. The genetic height score was moderately correlated with  
5109 height in the subset of 3,467 Danish ancestry conscripts ( $r^2 = 0.095$ ,  $P = 3.2e-77$ ), and we  
5110 rescaled the score to a unit corresponding to 1 cm change in predicted height with the  
5111 median score in the conscript subset as zero. Thus, the PGS in each ancient sample  
5112 corresponds to the predicted difference in cm from the average of the present-day Danish  
5113 population, assuming that the scores are equally predictive in males and females. The  
5114 genetic height score is however limited in two important ways; firstly, the predictive value of  
5115 the genetic height score is modest and diminishes with general genetic distance to the  
5116 population in which the allelic effects were determined (in this case European ancestry  
5117 British); secondly, the score does not take account of important environmental factors such  
5118 as health and access to nutrition in childhood.

5119

5120 The genetic predictions of eye and hair colour were done based on the HirisPlex system <sup>5</sup>.  
5121 Out of 24 main effect HirisPlex variants, genotype likelihoods of 18 SNPs were available in  
5122 the ancient sample 1000G imputation, and imputed effect allele dosages of these were used  
5123 to derive probabilities for brown, blue and grey/intermediate eye colour and blond, brown,  
5124 black and red hair colour, following the HirisPlex formulas <sup>5</sup>.

5125

5126 The results of genetic prediction of height, eye and hair colour are shown alongside results  
5127 of other analyses in the composite figure 4 in the main text, titled “Denmark through time”.  
5128 When excluding 27 samples with average genomic sequence coverage  $< 0.1x$  (indicated in  
5129 shaded colour in figure 4 and with “0” in the Cov QC column of the Table S4f.1 below), the  
5130 predicted genetic height differed significantly across the three groups defined by the two  
5131 major population turnover events from Mesolithic Hunter-Gatherer (ML-HG) to Neolithic  
5132 Early Farmer (NL-EF), and later to Neolithic Steppe Pastoralist (NL-SP), and indicated with  
5133 thick lines through the panels of figure 4 (ANOVA chi-square test across all three groups,  
5134  $P = 5.1 \times 10^{-8}$ ). A follow-up pairwise testing found significant differences between all three  
5135 group pairs (linear regression,  $P < 0.05$  in all instances), with the lowest mean (plus/minus  
5136 standard error) predicted relative genetic height observed in ML-HG ( $-1.9 \pm 0.3$  cm), then  
5137 NL-EF ( $-0.3 \pm 0.5$  cm), and highest in NL-SP ( $1.2 \pm 0.4$  cm). It should be borne in mind that  
5138 the population structure of the ancient Danish samples, especially the ML-HG and NL-EF  
5139 groups, is different from the current day European ancestry British population (in which  
5140 allelic effects for genetic height were estimated), and although we have used only very

5141 robustly associated effect alleles to calculate the genetic height score, it is likely that it will  
 5142 not have correlated as well with actual height as it does in the current-day European  
 5143 ancestry Danish population (in which the score was rescaled). Therefore, the only  
 5144 conclusion that can be drawn from these results is that the common SNP alleles that  
 5145 contribute most strongly to increased height in current day European ancestry populations,  
 5146 were on average of slightly lower frequency in ML-HG, in similar frequency in NL-EF, and  
 5147 slightly higher frequency in NL-SP.

5148

5149 Among the 18 HirisPlex SNPs used to predict eye and hair colour, rs12913832 has the  
 5150 strongest overall dark/light pigmentation effect. At the same time rs12913832 has the lowest  
 5151 average maximum genotype probability (GPmax) of the HirisPlex SNPs across the ancient  
 5152 Danish imputed genotype dataset. To account for this, we applied a second quality filter  
 5153 when comparing predicted eye and hair colour probabilities across groups, by requiring a  
 5154 GPmax>0.6 for rs12913832 and for at least 15 of the other 17 pigmentation SNPs, which  
 5155 removed a further 17 samples in the cross-group comparison (marked with “0” in the Pigm  
 5156 QC column in Table S4f.1 below). In this comparison we did not find a significant difference  
 5157 in probability of brown eye colour (pEye Brown in Table S4f.1 below) across the three  
 5158 groups (ANOVA, P=0.21). On the other hand, the predicted probability of blond hair colour  
 5159 differed significantly across groups (ANOVA, P=1.1x10<sup>-9</sup>), with the mean likelihood (pHair  
 5160 Blond in Table S4f.1 below) increasing over time from ML-HG (0.05 ± 0.01) to NL-EF (0.25 ±  
 5161 0.06) and NL-SP (0.43 ± 0.07), although the difference between NL-EF and NL-SP was not  
 5162 significant (P=0.07). Although pigmentation traits are polygenic, many of the HirisPlex  
 5163 system alleles are so-called main effect alleles and therefore it is likely that the increased  
 5164 predicted probabilities for blond hair over time (and corresponding decrease in predicted  
 5165 probabilities for black hair) represent a true change in the prevalence of dark and light hair  
 5166 colour.

5167

5168 *Supplementary Table S4f.1. Estimated age, genomic coverage, predicted genetic height*  
 5169 *difference from current Danish population average, and predicted likelihood of eye and hair*  
 5170 *colour of 100 ancient Danish samples sequenced in this study*  
 5171

|        | Age   | Age   | Genomic  | Cov | Pigm | pHeight | pEye | pEye  | pEye  | pHair | pHair | pHair | pHair |
|--------|-------|-------|----------|-----|------|---------|------|-------|-------|-------|-------|-------|-------|
| Sample | (ybp) | group | coverage | QC  | QC   | (cm)    | Blue | Inter | Brown | Blond | Red   | Brown | Black |
| NEO254 | 10463 | ML-HG | 0.42     | 1   | 0    | -1.2    | 0.09 | 0.13  | 0.78  | 0.04  | 0     | 0.19  | 0.77  |
| NEO13  | 9507  | ML-HG | 0.01     | 0   | 0    | -0.7    | 0.43 | 0.19  | 0.38  | 0.18  | 0     | 0.36  | 0.46  |
| NEO91  | 9122  | ML-HG | 1.18     | 1   | 1    | -1.8    | 0.44 | 0.22  | 0.34  | 0.03  | 0     | 0.26  | 0.71  |
| NEO759 | 9028  | ML-HG | 2.95     | 1   | 1    | 0.2     | 0.58 | 0.16  | 0.26  | 0.04  | 0     | 0.21  | 0.75  |

|             |       |      |   |   |      |      |      |      |      |   |      |      |
|-------------|-------|------|---|---|------|------|------|------|------|---|------|------|
| NEO587 8798 | ML-HG | 1.14 | 1 | 1 | -3.5 | 0.73 | 0.13 | 0.14 | 0.01 | 0 | 0.18 | 0.81 |
| NEO123 8182 | ML-HG | 0.29 | 1 | 1 | -3   | 0.09 | 0.13 | 0.78 | 0.11 | 0 | 0.26 | 0.63 |
| NEO19 8163  | ML-HG | 3.26 | 1 | 1 | -3.5 | 0.53 | 0.27 | 0.2  | 0    | 0 | 0.28 | 0.72 |
| NEO122 8146 | ML-HG | 0.56 | 1 | 0 | -0.4 | 0.12 | 0.22 | 0.66 | 0    | 0 | 0.15 | 0.85 |
| NEO600 7817 | ML-HG | 0.10 | 0 | 1 | -0.7 | 0.01 | 0.09 | 0.9  | 0.02 | 0 | 0.28 | 0.7  |
| NEO683 7529 | ML-HG | 1.82 | 1 | 1 | -1.8 | 0.26 | 0.25 | 0.49 | 0.01 | 0 | 0.22 | 0.77 |
| NEO932 7499 | ML-HG | 2.76 | 1 | 1 | -4.6 | 0.64 | 0.19 | 0.17 | 0.01 | 0 | 0.15 | 0.84 |
| NEO589 7478 | ML-HG | 7.41 | 1 | 1 | -1   | 0.46 | 0.21 | 0.33 | 0.02 | 0 | 0.24 | 0.74 |
| NEO748 7129 | ML-HG | 0.08 | 0 | 0 | -0.2 | 0.32 | 0.17 | 0.51 | 0.05 | 0 | 0.27 | 0.68 |
| NEO814 7125 | ML-HG | 0.06 | 0 | 0 | -2.6 | 0.08 | 0.16 | 0.76 | 0.03 | 0 | 0.24 | 0.73 |
| NEO749 7070 | ML-HG | 1.91 | 1 | 1 | -1.3 | 0.57 | 0.19 | 0.24 | 0.03 | 0 | 0.26 | 0.71 |
| NEO791 7048 | ML-HG | 2.49 | 1 | 1 | -0.1 | 0.84 | 0.11 | 0.05 | 0.05 | 0 | 0.31 | 0.64 |
| NEO586 7031 | ML-HG | 0.20 | 1 | 1 | -1.4 | 0.51 | 0.21 | 0.28 | 0.02 | 0 | 0.28 | 0.7  |
| NEO746 6991 | ML-HG | 0.14 | 1 | 0 | -3.1 | 0.16 | 0.15 | 0.69 | 0.11 | 0 | 0.29 | 0.6  |
| NEO583 6981 | ML-HG | 0.18 | 1 | 1 | -2.5 | 0.44 | 0.15 | 0.41 | 0.2  | 0 | 0.28 | 0.52 |
| NEO822 6978 | ML-HG | 0.06 | 0 | 0 | 0.7  | 0.47 | 0.18 | 0.35 | 0.13 | 0 | 0.32 | 0.55 |
| NEO930 6888 | ML-HG | 0.05 | 0 | 0 | -2.1 | 0.4  | 0.18 | 0.42 | 0.07 | 0 | 0.26 | 0.67 |
| NEO733 6824 | ML-HG | 1.32 | 1 | 1 | -1.1 | 0.55 | 0.24 | 0.21 | 0.03 | 0 | 0.34 | 0.63 |
| NEO732 6815 | ML-HG | 0.13 | 1 | 1 | -4.5 | 0.34 | 0.24 | 0.42 | 0.03 | 0 | 0.36 | 0.61 |
| NEO745 6790 | ML-HG | 0.45 | 1 | 1 | -3   | 0.03 | 0.11 | 0.86 | 0.01 | 0 | 0.16 | 0.83 |
| NEO856 6777 | ML-HG | 0.56 | 1 | 1 | -2.3 | 0.39 | 0.22 | 0.39 | 0.02 | 0 | 0.19 | 0.79 |
| NEO747 6729 | ML-HG | 0.25 | 1 | 0 | -2.1 | 0.12 | 0.25 | 0.63 | 0    | 0 | 0.25 | 0.75 |
| NEO568 6586 | ML-HG | 1.98 | 1 | 1 | -4.4 | 0.57 | 0.19 | 0.24 | 0.01 | 0 | 0.26 | 0.73 |
| NEO1 6585   | ML-HG | 0.02 | 0 | 0 | 0.8  | 0.09 | 0.15 | 0.76 | 0.1  | 0 | 0.27 | 0.63 |
| NEO941 6372 | ML-HG | 0.14 | 1 | 1 | -5   | 0.19 | 0.21 | 0.6  | 0.03 | 0 | 0.29 | 0.68 |
| NEO570 6369 | ML-HG | 2.86 | 1 | 1 | -0.6 | 0.72 | 0.15 | 0.13 | 0.01 | 0 | 0.19 | 0.8  |

|             |       |      |   |   |      |      |      |      |      |   |      |      |
|-------------|-------|------|---|---|------|------|------|------|------|---|------|------|
| NEO751 6343 | ML-HG | 0.30 | 1 | 1 | -0.1 | 0.62 | 0.17 | 0.21 | 0.11 | 0 | 0.33 | 0.56 |
| NEO852 6308 | ML-HG | 0.19 | 1 | 1 | 1    | 0.44 | 0.24 | 0.32 | 0.02 | 0 | 0.32 | 0.66 |
| NEO855 6302 | ML-HG | 1.38 | 1 | 1 | -0.4 | 0.76 | 0.13 | 0.11 | 0.02 | 0 | 0.27 | 0.71 |
| NEO569 6142 | ML-HG | 0.67 | 1 | 1 | -2.2 | 0.64 | 0.17 | 0.19 | 0.01 | 0 | 0.2  | 0.79 |
| NEO598 6075 | ML-HG | 0.73 | 1 | 1 | -0.5 | 0.09 | 0.15 | 0.76 | 0    | 0 | 0.17 | 0.83 |
| NEO853 6047 | ML-HG | 1.96 | 1 | 1 | -1.8 | 0.88 | 0.08 | 0.04 | 0.04 | 0 | 0.3  | 0.66 |
| NEO3 5965   | ML-HG | 0.03 | 0 | 0 | -1   | 0.15 | 0.16 | 0.69 | 0.14 | 0 | 0.28 | 0.58 |
| NEO960 5926 | ML-HG | 0.15 | 1 | 1 | -3.9 | 0.75 | 0.11 | 0.14 | 0.32 | 0 | 0.32 | 0.36 |
| NEO645 5870 | ML-HG | 0.21 | 1 | 1 | -0.4 | 0.85 | 0.09 | 0.06 | 0.09 | 0 | 0.33 | 0.58 |
| NEO962 5786 | ML-HG | 0.04 | 0 | 0 | -1.9 | 0.07 | 0.11 | 0.82 | 0.2  | 0 | 0.27 | 0.53 |
| NEO601 5753 | NL-EF | 0.08 | 0 | 0 | 1.5  | 0    | 0.02 | 0.98 | 0.01 | 0 | 0.21 | 0.78 |
| NEO790 5662 | NL-EF | 0.69 | 1 | 0 | -4.2 | 0.28 | 0.16 | 0.56 | 0.25 | 0 | 0.29 | 0.46 |
| NEO891 5661 | NL-EF | 0.60 | 1 | 1 | 1.1  | 0.69 | 0.14 | 0.17 | 0.11 | 0 | 0.35 | 0.54 |
| NEO571 5534 | NL-EF | 0.06 | 0 | 0 | -1.5 | 0.11 | 0.15 | 0.74 | 0.29 | 0 | 0.28 | 0.43 |
| NEO23 5533  | NL-EF | 3.34 | 1 | 1 | -3.4 | 0.19 | 0.27 | 0.54 | 0.17 | 0 | 0.35 | 0.48 |
| NEO753 5531 | NL-EF | 0.16 | 1 | 1 | -0.4 | 0    | 0.03 | 0.97 | 0.02 | 0 | 0.15 | 0.83 |
| NEO942 5491 | NL-EF | 0.89 | 1 | 1 | 0.4  | 0.7  | 0.12 | 0.18 | 0.08 | 0 | 0.33 | 0.59 |
| NEO29 5489  | NL-EF | 0.53 | 1 | 1 | 3.9  | 0.7  | 0.15 | 0.15 | 0.45 | 0 | 0.31 | 0.24 |
| NEO564 5468 | NL-EF | 0.08 | 0 | 0 | -2.6 | 0.35 | 0.18 | 0.47 | 0.13 | 0 | 0.32 | 0.55 |
| NEO41 5462  | NL-EF | 0.02 | 0 | 0 | 1.4  | 0.05 | 0.13 | 0.82 | 0.13 | 0 | 0.32 | 0.55 |
| NEO28 5459  | NL-EF | 0.92 | 1 | 0 | 2.7  | 0.43 | 0.2  | 0.37 | 0.22 | 0 | 0.3  | 0.48 |
| NEO886 5457 | NL-EF | 0.27 | 1 | 1 | -1.9 | 0.7  | 0.13 | 0.17 | 0.66 | 0 | 0.19 | 0.15 |
| NEO866 5456 | NL-EF | 1.52 | 1 | 1 | -0.5 | 0.84 | 0.09 | 0.07 | 0.72 | 0 | 0.19 | 0.09 |
| NEO595 5452 | NL-EF | 0.22 | 1 | 0 | -2.3 | 0.53 | 0.15 | 0.32 | 0.41 | 0 | 0.28 | 0.31 |
| NEO757 5452 | NL-EF | 0.13 | 1 | 0 | -0.3 | 0.05 | 0.11 | 0.84 | 0.03 | 0 | 0.27 | 0.7  |
| NEO896 5446 | NL-EF | 0.12 | 1 | 0 | -1.8 | 0.01 | 0.05 | 0.94 | 0.03 | 0 | 0.17 | 0.8  |

|             |       |      |   |   |      |      |      |      |      |   |      |      |
|-------------|-------|------|---|---|------|------|------|------|------|---|------|------|
| NEO945 5445 | NL-EF | 1.38 | 1 | 1 | 0.3  | 0.01 | 0.05 | 0.94 | 0.03 | 0 | 0.22 | 0.75 |
| NEO888 5383 | NL-EF | 0.06 | 0 | 0 | 1.5  | 0.09 | 0.13 | 0.78 | 0.18 | 0 | 0.28 | 0.54 |
| NEO933 5337 | NL-EF | 0.52 | 1 | 1 | 2.4  | 0.65 | 0.15 | 0.2  | 0.36 | 0 | 0.31 | 0.33 |
| NEO744 5333 | NL-EF | 0.22 | 1 | 0 | 3.6  | 0.03 | 0.12 | 0.85 | 0.22 | 0 | 0.32 | 0.46 |
| NEO795 5333 | NL-EF | 0.03 | 0 | 0 | -1   | 0.13 | 0.16 | 0.71 | 0.2  | 0 | 0.33 | 0.47 |
| NEO702 5263 | NL-EF | 0.15 | 1 | 1 | -0.7 | 0.52 | 0.24 | 0.24 | 0.02 | 0 | 0.31 | 0.67 |
| NEO7 5242   | NL-EF | 0.01 | 0 | 0 | -1.1 | 0    | 0.04 | 0.96 | 0.03 | 0 | 0.23 | 0.74 |
| NEO597 5210 | NL-EF | 0.18 | 1 | 0 | 0.5  | 0.1  | 0.14 | 0.76 | 0.31 | 0 | 0.29 | 0.4  |
| NEO935 5187 | NL-EF | 5.03 | 1 | 1 | -1.4 | 0.09 | 0.15 | 0.76 | 0.44 | 0 | 0.27 | 0.29 |
| NEO865 5179 | NL-EF | 0.09 | 0 | 0 | -3.2 | 0.01 | 0.06 | 0.93 | 0.06 | 0 | 0.23 | 0.71 |
| NEO594 5174 | NL-EF | 0.05 | 0 | 0 | -1.8 | 0.47 | 0.19 | 0.34 | 0.31 | 0 | 0.33 | 0.36 |
| NEO961 5137 | NL-EF | 0.02 | 0 | 0 | 1.1  | 0.24 | 0.19 | 0.57 | 0.22 | 0 | 0.33 | 0.45 |
| NEO599 5134 | NL-EF | 0.19 | 1 | 0 | -2.6 | 0.02 | 0.11 | 0.86 | 0.08 | 0 | 0.24 | 0.68 |
| NEO602 5134 | NL-EF | 0.09 | 0 | 0 | -1.4 | 0.25 | 0.17 | 0.58 | 0.47 | 0 | 0.25 | 0.28 |
| NEO566 5130 | NL-EF | 0.02 | 0 | 0 | -3.2 | 0.44 | 0.17 | 0.39 | 0.38 | 0 | 0.28 | 0.34 |
| NEO33 5128  | NL-EF | 0.05 | 0 | 0 | -3.1 | 0.07 | 0.15 | 0.78 | 0.02 | 0 | 0.2  | 0.78 |
| NEO898 5080 | NL-EF | 3.8  | 1 | 1 | -4   | 0.51 | 0.13 | 0.36 | 0.21 | 0 | 0.3  | 0.49 |
| NEO43 5067  | NL-EF | 0.11 | 1 | 0 | 1.9  | 0.05 | 0.14 | 0.81 | 0.17 | 0 | 0.36 | 0.47 |
| NEO25 4956  | NL-EF | 0.36 | 1 | 1 | 1.1  | 0.09 | 0.16 | 0.75 | 0.08 | 0 | 0.33 | 0.59 |
| NEO925 4947 | NL-EF | 0.29 | 1 | 0 | -2.8 | 0    | 0.03 | 0.97 | 0.05 | 0 | 0.25 | 0.7  |
| NEO943 4614 | NL-EF | 1.75 | 1 | 1 | 2.1  | 0.03 | 0.07 | 0.9  | 0.2  | 0 | 0.26 | 0.54 |
| NEO580 4611 | NL-EF | 0.01 | 0 | 0 | -1.3 | 0.03 | 0.09 | 0.88 | 0.09 | 0 | 0.28 | 0.63 |
| NEO792 4493 | NL-SP | 0.25 | 1 | 1 | -0.4 | 0.04 | 0.09 | 0.87 | 0.14 | 0 | 0.27 | 0.59 |
| NEO876 4338 | NL-SP | 0.05 | 0 | 0 | -2.4 | 0.01 | 0.08 | 0.91 | 0.16 | 0 | 0.31 | 0.53 |
| NEO870 4240 | NL-SP | 0.58 | 1 | 1 | 2.2  | 0.23 | 0.26 | 0.51 | 0.37 | 0 | 0.33 | 0.3  |
| NEO92 4188  | NL-SP | 0.61 | 1 | 1 | -0.9 | 0.82 | 0.11 | 0.07 | 0.48 | 0 | 0.25 | 0.27 |

|             |       |      |   |   |      |      |      |      |      |      |      |      |
|-------------|-------|------|---|---|------|------|------|------|------|------|------|------|
| NEO737 4106 | NL-SP | 0.24 | 1 | 1 | 1    | 0.77 | 0.15 | 0.08 | 0.27 | 0    | 0.41 | 0.32 |
| NEO738 4103 | NL-SP | 1.21 | 1 | 1 | -0.3 | 0.92 | 0.05 | 0.03 | 0.73 | 0    | 0.17 | 0.1  |
| NEO861 4102 | NL-SP | 0.38 | 1 | 1 | 0.5  | 0.79 | 0.11 | 0.1  | 0.74 | 0    | 0.17 | 0.09 |
| NEO878 4026 | NL-SP | 0.28 | 1 | 1 | -2.3 | 0.45 | 0.15 | 0.4  | 0.37 | 0    | 0.33 | 0.3  |
| NEO872 3979 | NL-SP | 0.08 | 0 | 0 | -0.1 | 0.62 | 0.15 | 0.23 | 0.44 | 0    | 0.3  | 0.26 |
| NEO735 3972 | NL-SP | 0.67 | 1 | 1 | 2.5  | 0.78 | 0.11 | 0.11 | 0.76 | 0.01 | 0.16 | 0.07 |
| NEO875 3970 | NL-SP | 0.18 | 1 | 0 | 1.6  | 0.07 | 0.11 | 0.82 | 0.18 | 0    | 0.27 | 0.55 |
| NEO739 3965 | NL-SP | 1.88 | 1 | 1 | 0.9  | 0.01 | 0.04 | 0.95 | 0.02 | 0    | 0.15 | 0.83 |
| NEO934 3809 | NL-SP | 0.08 | 0 | 0 | 2    | 0.19 | 0.15 | 0.66 | 0.29 | 0    | 0.31 | 0.4  |
| NEO93 3735  | NL-SP | 1.98 | 1 | 1 | -0.3 | 0.26 | 0.25 | 0.49 | 0.1  | 0    | 0.39 | 0.51 |
| NEO860 3697 | NL-SP | 0.20 | 1 | 0 | 1.2  | 0.55 | 0.2  | 0.25 | 0.66 | 0    | 0.21 | 0.13 |
| NEO857 3637 | NL-SP | 0.04 | 0 | 0 | -1.9 | 0.09 | 0.17 | 0.74 | 0.26 | 0    | 0.31 | 0.43 |
| NEO752 3589 | NL-SP | 2.09 | 1 | 1 | 1.8  | 0.64 | 0.12 | 0.24 | 0.31 | 0    | 0.31 | 0.38 |
| NEO815 3471 | NL-SP | 0.11 | 1 | 0 | 4.3  | 0.48 | 0.24 | 0.28 | 0.33 | 0.04 | 0.42 | 0.21 |
| NEO563 3350 | NL-SP | 0.81 | 1 | 1 | 3.6  | 0.69 | 0.14 | 0.17 | 0.59 | 0.09 | 0.19 | 0.13 |
| NEO590 3290 | NL-SP | 1.01 | 1 | 1 | 2.9  | 0.85 | 0.07 | 0.08 | 0.84 | 0.01 | 0.11 | 0.04 |
| NEO951 3242 | NL-SP | 0.45 | 1 | 0 | 1.7  | 0.01 | 0.06 | 0.93 | 0.2  | 0    | 0.34 | 0.46 |
| NEO946 3094 | NL-SP | 1.24 | 1 | 1 | 2.2  | 0.8  | 0.1  | 0.1  | 0.28 | 0.01 | 0.37 | 0.34 |

5172  
5173  
5174

---

## 5175 References

- 5176 1. Bycroft, C. *et al.* The UK Biobank resource with deep phenotyping and genomic data.  
5177 *Nature* **562**, 203–209 (2018).
- 5178 2. Price, A. L. *et al.* Long-range LD can confound genome scans in admixed  
5179 populations. *American journal of human genetics* vol. 83 132–5; author reply 135–9  
5180 (2008).

- 5181 3. Purcell, S. *et al.* PLINK: a tool set for whole-genome association and population-  
5182 based linkage analyses. *Am. J. Hum. Genet.* **81**, 559–575 (2007).
- 5183 4. Pedersen, C. B. *et al.* The iPSYCH2012 case-cohort sample: new directions for  
5184 unravelling genetic and environmental architectures of severe mental disorders. *Mol.*  
5185 *Psychiatry* **23**, 6–14 (2018).
- 5186 5. Walsh, S. *et al.* The HirisPlex system for simultaneous prediction of hair and eye  
5187 colour from DNA. *Forensic Sci. Int. Genet.* **7**, 98–115 (2013).

5188  
5189

## 5190 4g) Calling chr17q21.31 KANSL1 Duplications in Ancient 5191 Genomes

5192  
5193  
5194

Alma S. Halgren<sup>1</sup>, Andrés Ingason<sup>2,3</sup>, and Peter H. Sudmant<sup>1</sup>

5195  
5196  
5197  
5198  
5199

<sup>1</sup>Department of Integrative Biology, University of California, Berkeley

<sup>2</sup>Institute of Biological Psychiatry, Mental Health Services, Copenhagen University Hospital

<sup>3</sup>Lundbeck Foundation GeoGenetics Centre, GLOBE Institute, University of Copenhagen,  
Copenhagen, Denmark

5200  
5201  
5202  
5203  
5204  
5205  
5206  
5207  
5208  
5209  
5210  
5211  
5212  
5213  
5214

To call the distinct H1 and H2 specific KANSL1 duplications at chr17q21.31 (H1D and H2D respectively), we first removed samples that were too noisy to be accurately genotyped. To do so, we calculated the standard deviation of genome-wide copy number (after removing the top and bottom fifth percentiles of copy number to exclude outliers). We chose standard deviation cutoffs based on a visual inspection of the data – 0.49 for the fastq samples and 0.804 for the bam samples. While bam and fastq samples exhibited genome-wide differences in coverage and noise resulting in these different cutoffs, the selected samples exhibit similar signatures at the KANSL1 locus. Together this resulted in a total of 1143 samples, 427 fastq samples and 716 bam samples. We then set a copy number cutoff of 10 at the KANSL1 locus (copy number signal above 10 is likely noise) and calculated the average copy number in the H1D and H2D coordinate blocks (Fig S4g.1A). We filtered for samples with an average copy number in both the H1D and H2D blocks between 1.5 and 5.25 (values outside of these bounds are likely noise). The samples clustered into duplication genotypes (colored below) with the exception of a handful of samples on the border of genotype groups for which we could not accurately assign a genotype (marked

5215 with 'x'). Figure S4g.1B shows the SNP inversion calls for these samples, which align with  
5216 the duplication calls.  
5217

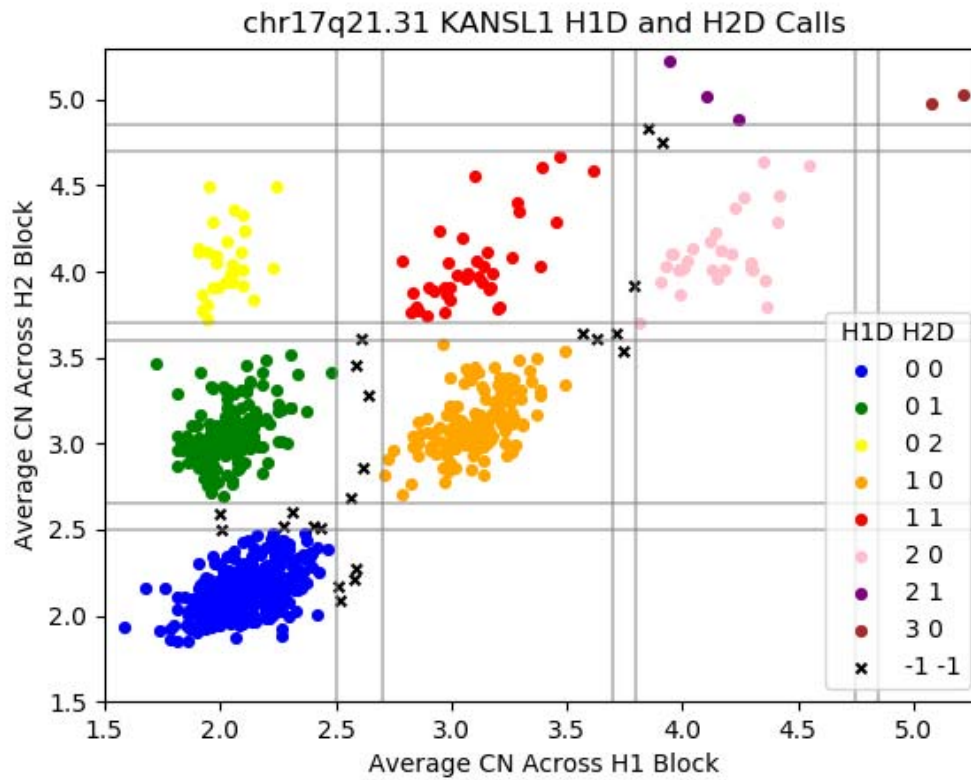

5218  
5219 **Figure S4g.1A.** *KANSL1* H1D and H2D calls grouped by genotype. The samples marked  
5220 with an 'x' are considered ambiguous as they are between groups.



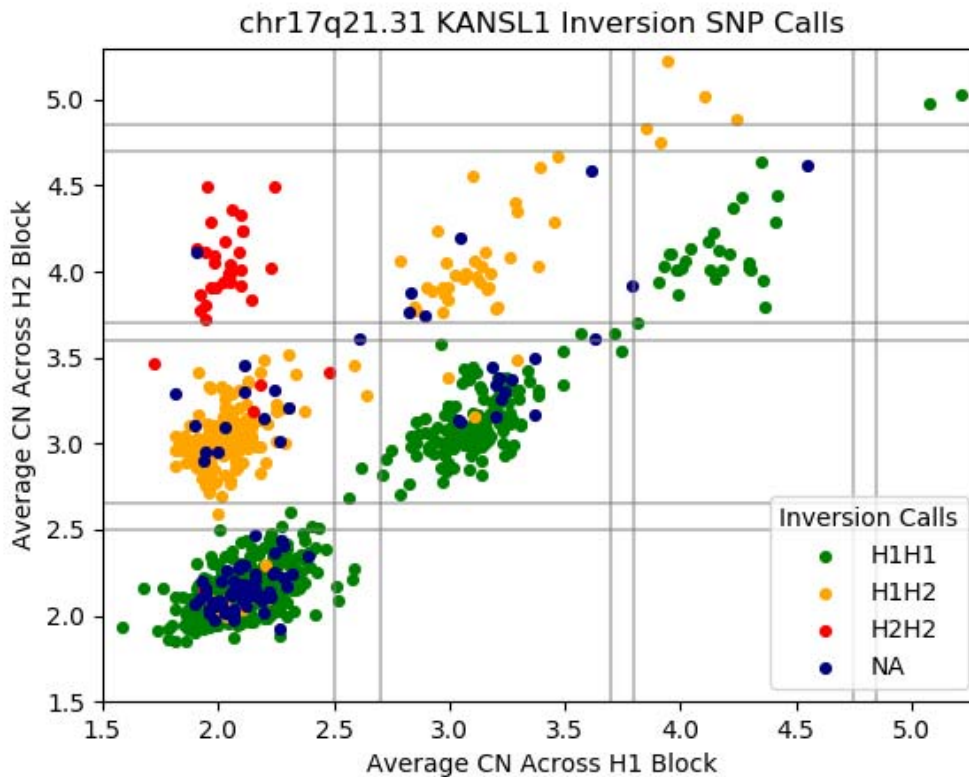

5221  
 5222 **Figure S4g.1B.** *KANSL1* H1 and H2 inversion calls mapped atop H1D and H2D average  
 5223 copy number values. The inversion and duplication calls align.  
 5224

#### 5225 4h) Calculating ancestral contributions to modern complex 5226 phenotypes

5227  
 5228 Will Barrie<sup>1</sup> and Dan Lawson<sup>2</sup>

5229 <sup>1</sup>Zoology Department, University of Cambridge, UK.

5230 <sup>2</sup>School of Mathematics and Integrative Epidemiology Unit, University of Bristol, UK.

5231

#### 5232 Introduction

5233 Most studies that look at polygenic risk scores in ancient populations use genotypes of  
 5234 ancient individuals, combined with effect sizes from modern GWAS studies, to reconstruct  
 5235 risk scores for ancient individuals <sup>1</sup>. This involves exporting effect sizes across space and

5236 time, which is known to dramatically reduce the accuracy of the estimates <sup>2</sup>. Additionally,  
5237 these scores are usually impossible to verify (except with specific phenotypes such as height  
5238 where calibration is possible <sup>3,4</sup>, and don't necessarily measure what an ancient population  
5239 contributed to phenotypic diversity in a modern population(s), especially when there has  
5240 been selection or bottleneck events in between.

5241

5242 Here, we aim to use local ancestry information resulting from painting the UK Biobank (UKB)  
5243 (Supplementary Note S3h) to estimate ancestral contributions to modern complex  
5244 phenotypes, by calculating polygenic risk scores for each ancestry based on local painting  
5245 results. This is a well-powered approach due to the large modern sample size, and is a more  
5246 direct measure of the variants that a given ancestry contributed to the “white British” genetic  
5247 landscape. Thus we can draw conclusions about the differing contributions of each ancestry  
5248 to modern genetic risk, whether due to drift or selection. We use bootstrapping to test  
5249 whether some ancestries are significantly and systematically over-represented for a  
5250 phenotype, indicating selection. Additionally, we look at the ancestral haplotypic background  
5251 of a high effect variant, ApoE4, which is implicated in Alzheimer's Disease <sup>5,6</sup>.

5252

## 5253 Methods

5254 We used effect size estimates from the UK Biobank Neale lab GWAS <sup>7</sup>, and used 1,703 non-  
5255 overlapping and approximately independent linkage disequilibrium (LD) blocks <sup>8</sup>. For each  
5256 block, we restricted the SNPs to those with a p-value less than the genome-wide  
5257 significance threshold (5e-8), and from these chose the SNP with the lowest p-value. We  
5258 then used these SNPs to calculate polygenic risk scores for each ancestry, using ancestry-  
5259 specific ‘effect allele frequencies’ derived from the painting.

5260

5261 In order to calculate the effect allele frequency for a given ancestry  $f_{\{anc,i\}}$  we used the  
5262 formula:

5263

$$5264 \quad f_{\{anc,i\}} = \frac{\sum_j^M \text{Painting certainty}_{\{j,effect\}}}{\sum_j^M \text{Painting certainty}_{\{j,effect\}} + \sum_j^M \text{Painting certainty}_{\{j,alt\}}}$$

5265

5266 Where there are M individuals, and  $\sum_j^M \text{Painting certainty}_{\{j,effect\}}$  is the sum of the  
5267 painting probabilities for that ancestry of all effect alleles. This calculates an effect allele  
5268 frequency for an ancestry which is weighted by the painting probabilities: if a haplotype with  
5269 the effect allele was painted with low probability for that ancestry, it will contribute little to the

5270 calculation, and vice versa. One benefit of this approach is that because it only matters how  
5271 effect alleles are painted relative to alternate alleles for an ancestry group, and differences in  
5272 genome-wide painting averages between ancestries will not cause bias.

5273

5274 To calculate an ancestry-specific PRS we used an additive model, including a transformation  
5275 as in Berg & Coop<sup>9</sup> and in line with (Supplementary Note S4c). We derived standard  
5276 deviations for each score by running a block bootstrap (1000 iterations) on (1) loci and (2)  
5277 individuals. We calculated polygenic risk scores for 39 traits shown to be significantly over-  
5278 dispersed across ancient populations beyond what would be expected under a null model of  
5279 genetic drift (Supplementary Note S4c). For computational reasons, we used a random  
5280 batch of 48,000 painted individuals to calculate the effect allele frequencies, which is  
5281 sufficiently large to approximate the frequencies even for ancestries that are painted less.

5282

5283 Our calculations were limited to the 549,323 SNPs used in the painting of the UKB  
5284 (Supplementary Note S3h). This is expected to reduce predictive power compared to using  
5285 the full set of imputed SNPs in the UKB, but only slightly<sup>10</sup>. There was a ~15% decrease in  
5286 the number of SNPs included per phenotype in the PRS calculation compared with the  
5287 imputed data.

5288

5289 To test the ancestral background of a single variant, APOE4, we calculated the average  
5290 painting score for each ancestry at all sites on the chromosome of haplotypes containing the  
5291 effect allele. This makes it clear when there is an excess of a particular ancestry at the site  
5292 of interest.

5293

## 5294 Results

5295 Our results tell us about the ancestral contribution to modern phenotypes in the white British  
5296 population (Figure S4h.1, Figure S4h.2), and we stress we are not making claims about the  
5297 phenotypes of ancient populations.

5298

5299 We find that Yamnaya, CHG and EHG ancestral contributions (which together form a  
5300 'steppe' component) have relatively high scores for height, whereas Farmers and WHG  
5301 ancestral contributions have relatively low scores. This accords with most previous studies  
5302 <sup>3,11,12</sup> but not all <sup>13</sup>. EHG and Yamnaya both score highly for body mass and basal metabolic  
5303 rate.

5304

5305 Hair and skin pigmentation show significant differences between the ancestral contributions,  
5306 with risk scores for skin colour for the three hunter-gatherer ancestries being higher (i.e.  
5307 darker) than Farmer and Steppe (as in Ju and Mathieson <sup>14</sup>). On the other hand, traits  
5308 related to malignant neoplasms of skin show higher scores for the Farmer ancestral  
5309 contribution; while Farmer and Yamnaya ancestral contributions have higher scores for  
5310 blonde and light brown hair, with the hunter-gatherer ancestries showing higher scores for  
5311 dark brown. CHG is the only ancestral contribution which stands out as having a high risk  
5312 score for black hair.

5313

5314 Intriguingly, the WHG ancestral component has strikingly high scores for traits related to  
5315 cholesterol, blood pressure and diabetes, both when bootstrapping individuals and loci <sup>cf. 13</sup>.  
5316 In terms of psychiatric traits, the Farmer component scores highest for anxiety, guilty  
5317 feelings, and irritability.

5318

5319 Our two bootstrapping methods mean slightly different things. Individuals in the UKB are  
5320 related through shared genealogies, and so by bootstrapping over non-independent  
5321 individuals (Figure S4h.1) we are testing the consistency of the signal within the population.  
5322 From this bootstrapping exercise we can conclude whether a difference in allele frequencies  
5323 in ancient populations contributed to phenotypic variation today. Unsurprisingly, with a large  
5324 enough sample size most phenotypes will show differences in ancestral contributions for  
5325 this, usually due to drift or founder effects. However, this goes further than just reporting risk  
5326 scores for ancient populations, because we are looking directly at coalescent tracts in the  
5327 British population. We can conclude that “ancestry X contributes higher genetic risk for  
5328 phenotype Y in the test population”. On the other hand, because we have used independent  
5329 LD blocks to select SNPs to include in the PRS calculation, the requirement for  
5330 independence is met when we bootstrap with loci (Figure S4h.2). A positive result here is  
5331 therefore much stronger, showing a systematic over/under-representation of an ancestry at  
5332 loci affecting a given trait, beyond what is expected given the correlation among individuals.  
5333 This points towards selection as an explanation.

5334

5335 The effect/risk allele (rs429358, n=127,760) of ApoE4 is preferentially painted as  
5336 WHG/EHG, with a clear depletion of other ancestries (especially Farmer) at this locus  
5337 compared to the genome-wide average (Figure S4h.3). This indicates that this allele was  
5338 contributed at least in part by hunter-gatherer ancestry into modern (British) populations,  
5339 above what we would expect by chance.

5340

## 5341 Discussion

5342 The methods here directly link genetic contributions from pre-defined ancestries to complex  
5343 phenotypes in modern people. For most traits, each ancestry contributed differently to the  
5344 modern genetic landscape, with some conveying enhanced or reduced risk either due to drift  
5345 (including population bottlenecks/founder events) or selection. Because gradients exist in  
5346 these ancestries across the British Isles and further afield ([Supplementary Note S3h](#)), these  
5347 differing risk scores indicate how geographically heterogeneous ancestry distributions may  
5348 contribute to differing genetic risk profiles, in addition to other factors such as geography,  
5349 socio-economic status etc.

5350

5351 A caveat for all studies involving polygenic risk calculation is that they rely on effect size  
5352 estimates from an original GWAS which may be affected by population stratification in the  
5353 GWAS panel, even when it has apparently been controlled for. This seems to be less of a  
5354 problem in the UKB than in previous GWAS studies <sup>15</sup>, but should be kept in mind. One  
5355 benefit of our approach is that there is no requirement to export these risk scores across  
5356 time and space: we are using effect sizes estimated from the modern population to calculate  
5357 ancestral contributions to the same modern population.

5358

5359 ApoE4 is an isoform of the APOE gene, resulting from linkage disequilibrium between two  
5360 SNPs, rs429358 and rs7412 <sup>16</sup>, and associated with increased risk for metabolic, vascular  
5361 and neurodegenerative diseases in adulthood <sup>17</sup>. It may provide some enhanced cognitive  
5362 ability in children and young adults <sup>18</sup> and other health and immunity benefits, particularly in  
5363 highly infected environments <sup>e.g. 19</sup>. There are several lines of evidence suggesting a link  
5364 between the evolution of diet and the ApoE isoforms:  $\epsilon$ 2 and  $\epsilon$ 3 alleles are associated with  
5365 lower levels of blood cholesterol <sup>20,21</sup>, while  $\epsilon$ 4 is associated with higher levels, leading some  
5366 to speculate that the derived  $\epsilon$ 3 allele is 'meat-adaptive' <sup>22,23</sup>. In a study of South Americans,  
5367 there was a five-fold increase in the ApoE4 allele in hunter-gatherers versus horticulturalists  
5368 <sup>24</sup>, potentially because the immune benefits outweighed the advantages of low blood  
5369 cholesterol <sup>25</sup>. Generally,  $\epsilon$ 4 prevalence is higher in indigenous foraging groups such as the  
5370 Pygmies, Khoi San, Papuans and some Native Americans, while  $\epsilon$ 3 is most frequent in  
5371 populations with a long-established agricultural economy <sup>26</sup>. Finally, ApoE4 is implicated in  
5372 higher blood vitamin D levels <sup>27</sup>.

5373

5374 The  $\epsilon$ 4 variant has been shown to be ancestral in humans <sup>28</sup>. There is a linear increasing  
5375 trend in  $\epsilon$ 4 prevalence from South to North in Europe, with Sardinians showing the lowest  
5376 prevalence <sup>29-31</sup>, while there is a more than two-fold increase in Nordic versus Mediterranean

5377 countries<sup>32</sup>. Sardinians are an unusual population, having the highest level of neolithic  
 5378 farmer ancestry of all modern European populations<sup>33</sup>. In this light, differences in genome-  
 5379 wide ancestry proportions between northern (high WHG/EHG, low Farmer) and southern  
 5380 Europe (high Farmer, low WHG/EHG) (Supplementary Note S3h) may explain at least part  
 5381 of the differences in frequency of the  $\epsilon 4$  variant and subsequent AD genetic risk.

5382 Figures/tables

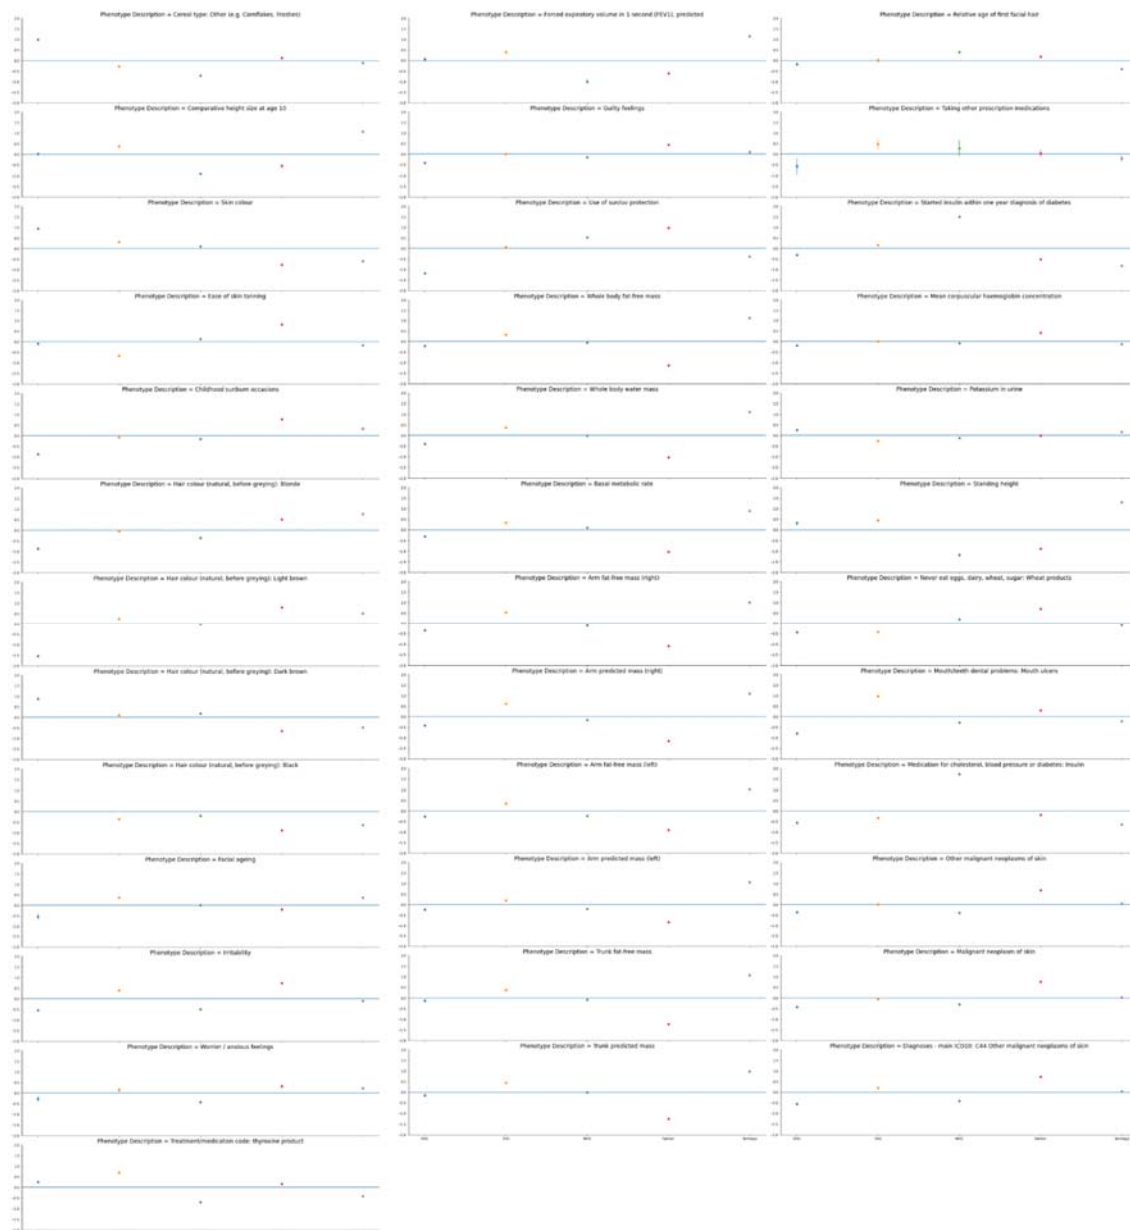

5383 **Figure S4h.1. Ancestry-specific polygenic risk scores with 95% confidence intervals derived**  
 5384 **from bootstrapping individuals for phenotypes shown to be significantly over-dispersed**  
 5385 **between ancient populations.** Confidence intervals were calculated by re-running PRS calculation  
 5386 on random batches of 48,000 individuals, with replacement (1000 iterations), while keeping all other  
 5387 annotations intact. Here we show 2 x standard deviation error bars, expected to represent ~95%  
 5388

5389 confidence interval under a normal distribution. Bootstrapping individuals tests the extent to which  
 5390 ancestry X contributed higher genetic risk for phenotype Y in a given population, either due to drift or  
 5391 selection.  
 5392

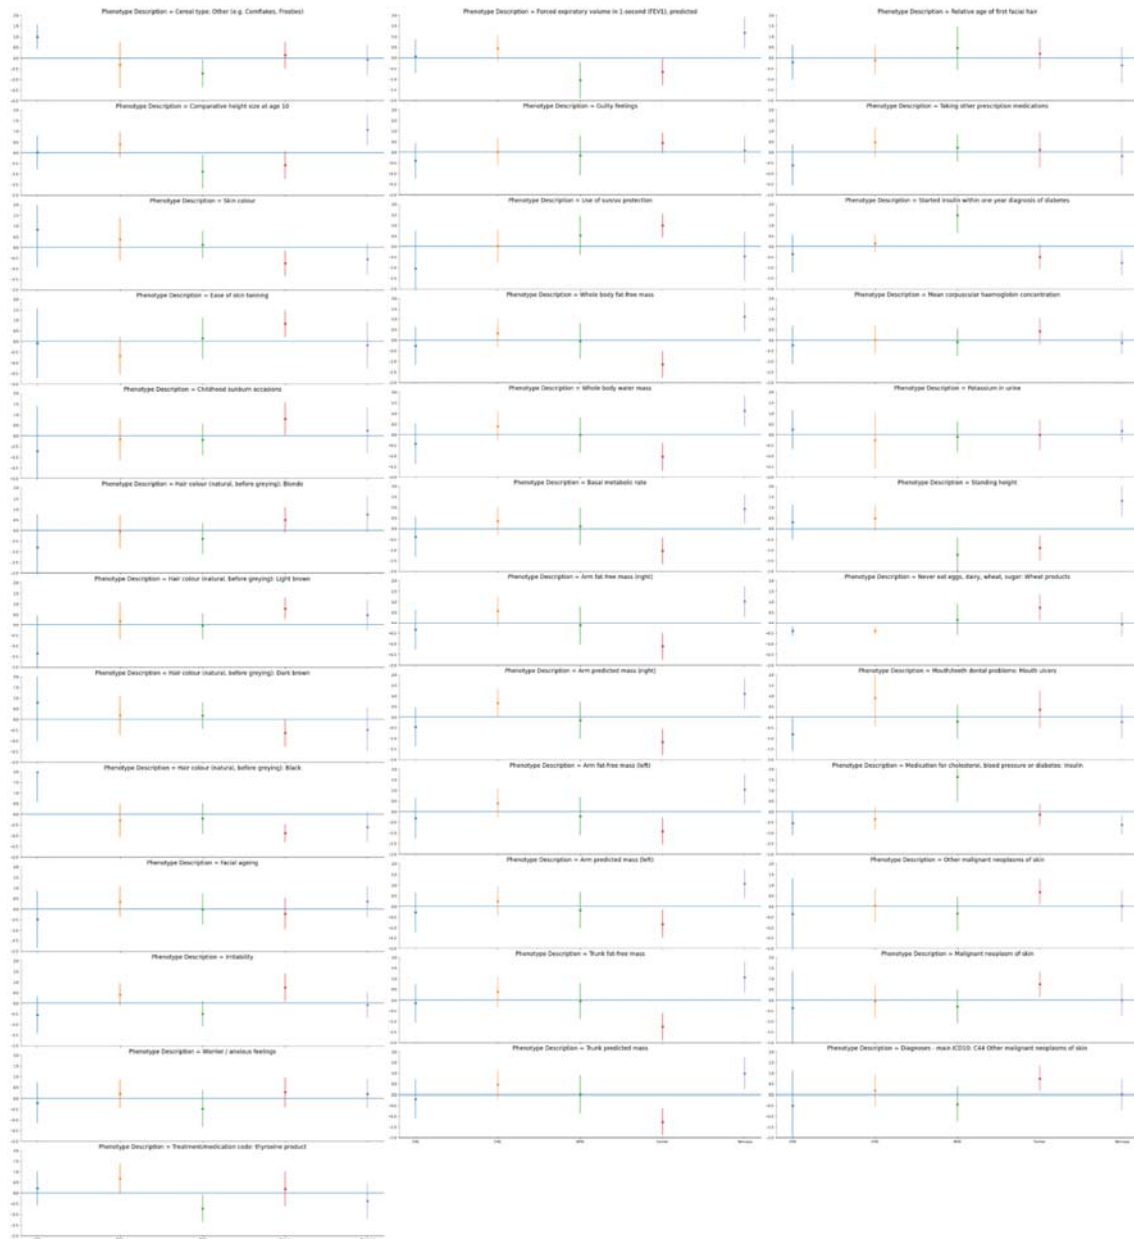

5393  
 5394 **Figure S4h.2. Ancestry-specific polygenic risk scores with 95% confidence intervals derived**  
 5395 **from bootstrapping loci for phenotypes shown to be significantly over-dispersed between**  
 5396 **ancient populations.** Confidence intervals were calculated by bootstrapping independent loci from  
 5397 separate LD blocks (1000 iterations), while keeping all other annotations intact. Here we show 2 x  
 5398 standard deviation error bars, expected to represent ~95% confidence interval under a normal  
 5399 distribution. Bootstrapping loci tests whether there is a systematic bias towards an ancestry for a  
 5400 given phenotype across all significant SNPs, possibly indicating selection.  
 5401

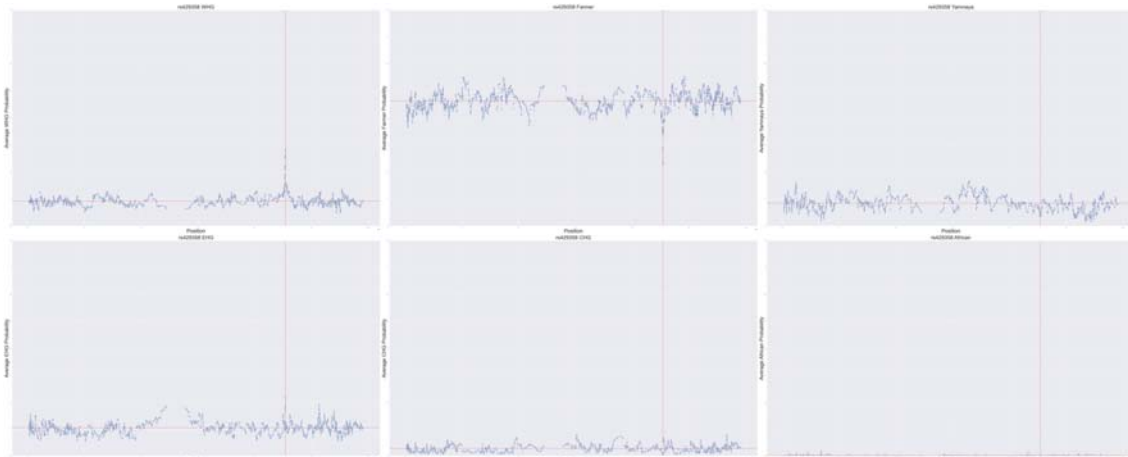

5402  
 5403 **Figure S4h.3. Average painting score for each ancestry at all sites on chromosome 19 of**  
 5404 **haplotypes containing the effect allele for ApoE4 (rs429358, n=127,760).** Vertical red line  
 5405 indicates the position of the SNP of interest; horizontal red line indicates the average painting score  
 5406 for that ancestry for haplotypes containing the effect allele across the entirety of chromosome 19.  
 5407 There is a clear excess of WHG/EHG ancestry and a depletion of Farmer ancestry at this locus.

5408 **References**

5409

5410 1. Irving-Pease, E. K., Muktopavela, R., Dannemann, M. & Racimo, F. Quantitative  
 5411 Human Paleogenetics: What can Ancient DNA Tell us About Complex Trait Evolution?  
 5412 *Front. Genet.* **12**, 703541 (2021).

5413 2. Duncan, L. *et al.* Analysis of polygenic risk score usage and performance in diverse  
 5414 human populations. *Nat. Commun.* **10**, 3328 (2019).

5415 3. Cox, S. L., Ruff, C. B., Maier, R. M. & Mathieson, I. Genetic contributions to variation  
 5416 in human stature in prehistoric Europe. *Proc. Natl. Acad. Sci. U. S. A.* **116**, 21484–  
 5417 21492 (2019).

5418 4. Cox, S. L. *et al.* Predicting skeletal stature using ancient DNA. *American Journal of*  
 5419 *Biological Anthropology* **177**, 162–174 (2022).

5420 5. Corder, E. H. *et al.* Gene dose of apolipoprotein E type 4 allele and the risk of  
 5421 Alzheimer's disease in late onset families. *Science* **261**, 921–923 (1993).

5422 6. Strittmatter, W. J. *et al.* Binding of human apolipoprotein E to synthetic amyloid beta  
 5423 peptide: isoform-specific effects and implications for late-onset Alzheimer disease.  
 5424 *Proc. Natl. Acad. Sci. U. S. A.* **90**, 8098–8102 (1993).



- 5425 7. Bycroft, C. *et al.* The UK Biobank resource with deep phenotyping and genomic data.  
5426 *Nature* **562**, 203–209 (2018).
- 5427 8. Berisa, T. & Pickrell, J. K. Approximately independent linkage disequilibrium blocks in  
5428 human populations. *Bioinformatics* **32**, 283–285 (2016).
- 5429 9. Berg, J. J. & Coop, G. A population genetic signal of polygenic adaptation. *PLoS*  
5430 *Genet.* **10**, e1004412 (2014).
- 5431 10. Choi, S. W. & O'Reilly, P. F. PRSice-2: Polygenic Risk Score software for  
5432 biobank-scale data. *Gigascience* **8**, (2019).
- 5433 11. Mathieson, I. *et al.* Genome-wide patterns of selection in 230 ancient  
5434 Eurasians. *Nature* **528**, 499–503 (2015).
- 5435 12. Martiniano, R. *et al.* The population genomics of archaeological transition in  
5436 west Iberia: Investigation of ancient substructure using imputation and haplotype-based  
5437 methods. *PLoS Genet.* **13**, e1006852 (2017).
- 5438 13. Marnetto, D. *et al.* Ancestral contributions to contemporary European complex  
5439 traits. *bioRxiv* 2021.08.03.454888 (2021) doi:10.1101/2021.08.03.454888.
- 5440 14. Ju, D. & Mathieson, I. The evolution of skin pigmentation-associated variation  
5441 in West Eurasia. *Proc. Natl. Acad. Sci. U. S. A.* **118**, (2021).
- 5442 15. Berg, J. J. *et al.* Reduced signal for polygenic adaptation of height in UK  
5443 Biobank. *Elife* **8**, (2019).
- 5444 16. Rall, S. C., Jr, Weisgraber, K. H. & Mahley, R. W. Human apolipoprotein E.  
5445 The complete amino acid sequence. *J. Biol. Chem.* **257**, 4171–4178 (1982).
- 5446 17. de-Almada, B. V. P. *et al.* Protective effect of the APOE-e3 allele in  
5447 Alzheimer's disease. *Braz. J. Med. Biol. Res.* **45**, 8–12 (2012).
- 5448 18. Tuminello, E. R. & Han, S. D. The apolipoprotein e antagonistic pleiotropy  
5449 hypothesis: review and recommendations. *Int. J. Alzheimers. Dis.* **2011**, 726197 (2011).
- 5450 19. Oriá, R. B., Patrick, P. D., Blackman, J. A., Lima, A. A. M. & Guerrant, R. L.  
5451 Role of apolipoprotein E4 in protecting children against early childhood diarrhea  
5452 outcomes and implications for later development. *Med. Hypotheses* **68**, 1099–1107

- 5453 (2007).
- 5454 20. Petkeviciene, J. *et al.* Associations between apolipoprotein E genotype, diet,  
5455 body mass index, and serum lipids in Lithuanian adult population. *PLoS One* **7**, e41525  
5456 (2012).
- 5457 21. Carvalho-Wells, A. L. *et al.* Interactions between age and apoE genotype on  
5458 fasting and postprandial triglycerides levels. *Atherosclerosis* **212**, 481–487 (2010).
- 5459 22. Finch, C. E. & Stanford, C. B. Meat-adaptive genes and the evolution of  
5460 slower aging in humans. *Q. Rev. Biol.* **79**, 3–50 (2004).
- 5461 23. Allen, J. S., Bruss, J. & Damasio, H. The aging brain: the cognitive reserve  
5462 hypothesis and hominid evolution. *Am. J. Hum. Biol.* **17**, 673–689 (2005).
- 5463 24. Reales, G. *et al.* A tale of agriculturalists and hunter-gatherers: Exploring the  
5464 thrifty genotype hypothesis in native South Americans. *Am. J. Phys. Anthropol.* **163**,  
5465 591–601 (2017).
- 5466 25. Trumble, B. C. *et al.* Apolipoprotein E4 is associated with improved cognitive  
5467 function in Amazonian forager-horticulturalists with a high parasite burden. *FASEB J.*  
5468 **31**, 1508–1515 (2017).
- 5469 26. Corbo, R. M. & Scacchi, R. Apolipoprotein E (APOE) allele distribution in the  
5470 world. Is APOE\*4 a 'thrifty' allele? *Ann. Hum. Genet.* **63**, 301–310 (1999).
- 5471 27. Huebbe, P. *et al.* APOE  $\epsilon$ 4 is associated with higher vitamin D levels in  
5472 targeted replacement mice and humans. *FASEB J.* **25**, 3262–3270 (2011).
- 5473 28. Fullerton, S. M. *et al.* Apolipoprotein E variation at the sequence haplotype  
5474 level: implications for the origin and maintenance of a major human polymorphism. *Am.*  
5475 *J. Hum. Genet.* **67**, 881–900 (2000).
- 5476 29. Corbo, R. M., Scacchi, R., Mureddu, L., Mulas, G. & Alfano, G. Apolipoprotein  
5477 E polymorphism in Italy investigated in native plasma by a simple polyacrylamide gel  
5478 isoelectric focusing technique. Comparison with frequency data of other European  
5479 populations. *Ann. Hum. Genet.* **59**, 197–209 (1995).
- 5480 30. Lucotte, G., Loirat, F. & Hazout, S. Pattern of gradient of apolipoprotein E

- 5481 allele \*4 frequencies in western Europe. *Hum. Biol.* **69**, 253–262 (1997).
- 5482 31. Adler, G. *et al.* Bosnian study of APOE distribution (BOSAD): a comparison  
5483 with other European populations. *Ann. Hum. Biol.* **44**, 568–573 (2017).
- 5484 32. Trumble, B. C. & Finch, C. E. THE EXPOSOME IN HUMAN EVOLUTION:  
5485 FROM DUST TO DIESEL. *Q. Rev. Biol.* **94**, 333–394 (2019).
- 5486 33. Chiang, C. W. K. *et al.* Genomic history of the Sardinian population. *Nat.*  
5487 *Genet.* **50**, 1426–1434 (2018).

5488

#### 5489 4i) Pathogenic structural variants in ancient vs. modern-day 5490 humans

5491

5492 Alma S. Halgren<sup>1</sup>, Andrés Ingason<sup>2,3</sup>, and Peter H. Sudmant<sup>1</sup>

5493

5494 <sup>1</sup>Department of Integrative Biology, University of California, Berkeley

5495 <sup>2</sup>Institute of Biological Psychiatry, Mental Health Services, Copenhagen University Hospital

5496 <sup>3</sup>Lundbeck Foundation GeoGenetics Centre, GLOBE Institute, University of Copenhagen,  
5497 Copenhagen, Denmark

5498

5499

5500 Rare, recurrent copy-number variants (CNVs) are known to cause neurodevelopmental  
5501 disorders and are associated with a range of psychiatric and physical traits with variable  
5502 expressivity and incomplete penetrance <sup>1,2</sup>. We examined 50 regions susceptible to recurrent  
5503 CNV known to be the most prevalent drivers of human developmental pathologies <sup>3</sup> in 1442  
5504 ancient Eurasians and 1093 modern human populations (for comparison) to understand the  
5505 prevalence of pathogenic structural variants over time.

5506

5507 This analysis examines 1442 ancient humans from primarily West Eurasia and Central Asia  
5508 as well as 1093 publicly-available high-coverage modern human genomes encompassing  
5509 136 populations worldwide (from the Human Genome Diversity Project <sup>4</sup> and the Simons  
5510 Genome Diversity Project <sup>5</sup>). In modern humans and 690 ancient individuals with fastq files  
5511 available, paired-end Illumina reads were mapped to the human reference genome GRCh38  
5512 with BWA-MEM <sup>6</sup>. In the remaining 984 samples, only BAM files that had been mapped to  
5513 hg19 were available. Of note, in these 984 samples, the filtering of duplicate reads resulted  
5514 in the absence of signal over segmental duplications. Nonetheless, we were able to

5515 characterise structural variants intersecting unique sequences in these samples. The large  
5516 putatively pathogenic loci which we focused on in this analysis generally consist of unique  
5517 sequences flanked by segmental duplications. 232 samples were removed due to low  
5518 coverage and genotype yield out of 1674 total ancient samples, leaving 1442 samples for  
5519 the final analysis (601 from the fastq hg38 dataset and 841 from the BAM hg19 dataset). In  
5520 all samples, average read depth in 1kb sliding genomic windows was extracted from the  
5521 subsequent BAM files with pysamstats <sup>7</sup>. All alternate haplotypes were removed prior to  
5522 mapping. To approximate copy number from read depth, we masked tandem repeats  
5523 (Tandem Repeat Finder <sup>8</sup>), corrected read-depth estimates for underlying GC content  
5524 (similar method to Sudmant et al. 2013 <sup>9</sup>), and normalised by median read depth per  
5525 individual. We implemented a Gaussian Hidden Markov Model <sup>10</sup> to call structural variants  
5526 from read depth.

5527

5528 We identified CNVs in ancient individuals at ten loci using digital Comparative Genomic  
5529 Hybridization <sup>11</sup> (Table S4i.1; Figures S4i.1-S4i.20). Although most of the observed CNVs  
5530 (including duplications at 15q11.2 and *CHRNA7*, and CNVs spanning parts of the TAR locus  
5531 and 22q11.2 distal) have not been unambiguously associated with disease in large studies,  
5532 the identified CNVs include deletions and duplications that have been associated with  
5533 developmental delay, dysmorphic features, and neuropsychiatric abnormalities such as  
5534 autism (most notably at 1q21.1, 3q29, 16p12.1 and the DiGeorge/VCFS locus, but also  
5535 deletions at 15q11.2 and duplications at 16p13.11). However, phenotypes and risk  
5536 associated with these structural variants vary widely, and recent population-based studies  
5537 <sup>12,13</sup> suggest that they may be more common in the general population than previously  
5538 thought <sup>1,2</sup>. Overall, the carrier frequency in ancient samples is similar to that reported in the  
5539 UK Biobank (1.25% vs 1.6% at 15q11.2 and *CHRNA7* combined, and 0.8% vs 1.1% across  
5540 the remaining loci combined) <sup>12</sup>. These results suggest that large, recurrent CNVs that can  
5541 lead to several pathologies were present in ancient populations at similar frequencies as  
5542 modern populations.

5543

5544

| Region             | Ancient Deletions | SGDP & HGDP Deletions | UK Biobank Deletions | Ancient Duplications | SGDP & HGDP Duplications | UK Biobank Duplications |
|--------------------|-------------------|-----------------------|----------------------|----------------------|--------------------------|-------------------------|
| 1q21.1             | 0 (0%)            | 0 (0%)                | 113 (0.027%)         | 1 (0.069%)           | 0 (0%)                   | 177 (0.042%)            |
| 3q29               | 1 (0.069%)        | 0 (0%)                | 9 (0.002%)           | 1 (0.069%)           | 0 (0%)                   | 5 (0.001%)              |
| 15q11.2            | 4 (0.28%)         | 2 (0.18%)             | 1664 (0.39%)         | 10 (0.69%)           | 9 (0.82%)                | 2041 (0.48%)            |
| 15q11q13 (BP3-BP4) | 1 (0.069%)        | 0 (0%)                | 16 (0.004%)          | 0 (0%)               | 0 (0%)                   | 53 (0.013%)             |
| 15q13.3 (CHRNA7)   | 0 (0%)            | 1 (0.09%)             | 10 (0.002%)          | 4 (0.28%)            | 8 (0.73%)                | 3031 (0.72%)            |
| 16p12.1            | 1 (0.069%)        | 0 (0%)                | 246 (0.058%)         | 1 (0.069%)           | 0 (0%)                   | 202 (0.048%)            |
| 16p13.11           | 1 (0.069%)        | 0 (0%)                | 131 (0.031%)         | 4 (0.28%)            | 0 (0%)                   | 828 (0.2%)              |
| 22q11.2 (distal)*  | 4 (0.28%)         | 0 (0%)                | N/A                  | 13 (0.90%)           | 6 (0.55%)                | N/A                     |
| DiGeorge-VCFS      | 0 (0%)            | 0 (0%)                | 10 (0.0024%)         | 1 (0.069%)           | 0 (0%)                   | 280 (0.066%)            |
| TAR*               | 1 (0.069%)        | 0 (0%)                | N/A                  | 2 (0.14%)            | 0 (0%)                   | N/A                     |

5545  
5546  
5547  
5548  
5549  
5550  
5551  
5552  
5553  
5554  
5555  
5556  
5557

**Table S4i.1. Table of 10 pathogenic loci (out of 50 examined) with structural variants identified in the ancient dataset.** For each dataset, we report the prevalence of each SV as both the number of individuals identified as well as the percentage in each population (ancient dataset: 1442 samples; modern human Simons Genome Diversity Project (SGDP) <sup>5</sup> and Human Genome Diversity Project (HGDP) <sup>4</sup> dataset: 1093 samples; UK Biobank dataset: 421268 samples).  
\*Ancient SVs do not span entire locus, and therefore we cannot compare the UK Biobank frequencies for these loci (which span the entirety of the locus) to the ancient frequencies.

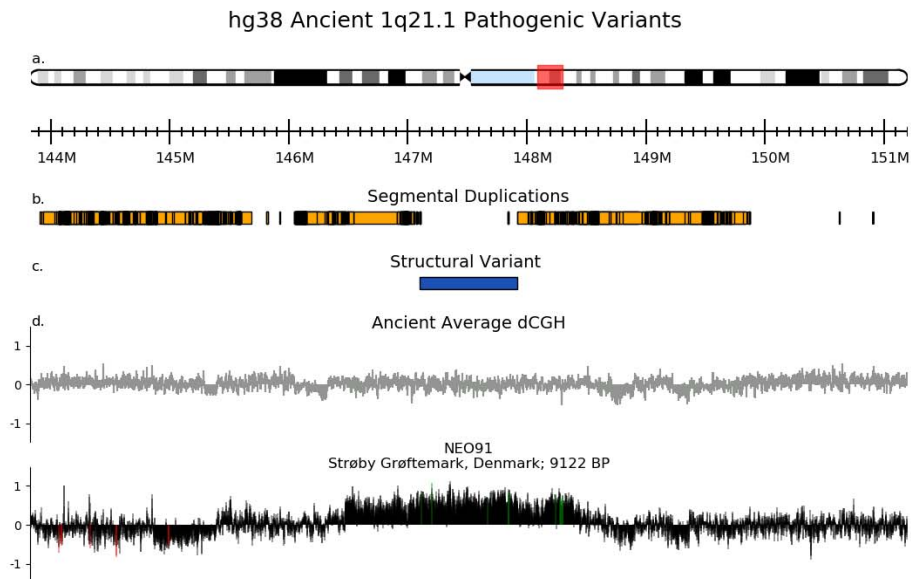

5558  
5559  
5560  
5561  
5562  
5563  
5564

**Figure S4i.1. Microduplication of an ancient individual at the 1q21.1 locus from the hg38 fastq dataset.** This 2 Mb microduplication is known to be associated with increased risk of neurological and psychiatric problems, delayed development, Tetralogy of Fallot, and micro/macrocephaly <sup>14-16</sup>. a. Chromosome 1 G-bands and axis bar (in Mbp). b. Segmental Duplications of >1000 bases of non-RepeatMasked <sup>17</sup> sequence from the UCSC Genome Browser <sup>18</sup>. c. Indices of the structural variant from the literature <sup>17</sup>. d. The average dCGH (in

5565 gray) is computed as follows: first, a non-noisy individual for this locus is selected; then, for  
5566 every other individual, the  $\log_2$  ratio of its copy number values over the non-noisy individuals'  
5567 copy number values is calculated; finally, the average of these ratios is depicted. The  $\log_2$   
5568 ratio of NEO91's copy number values over those of the non-noisy individual is shown below  
5569 (green = the ratio is at least 1.5 the standard deviation above the average dCGH; red = 1.5  
5570 std. dev. below). While there is little deviation from the "norm" copy number at this locus on  
5571 average, the dCGH of NEO91 is significantly greater than the average and indicates a  
5572 duplication.

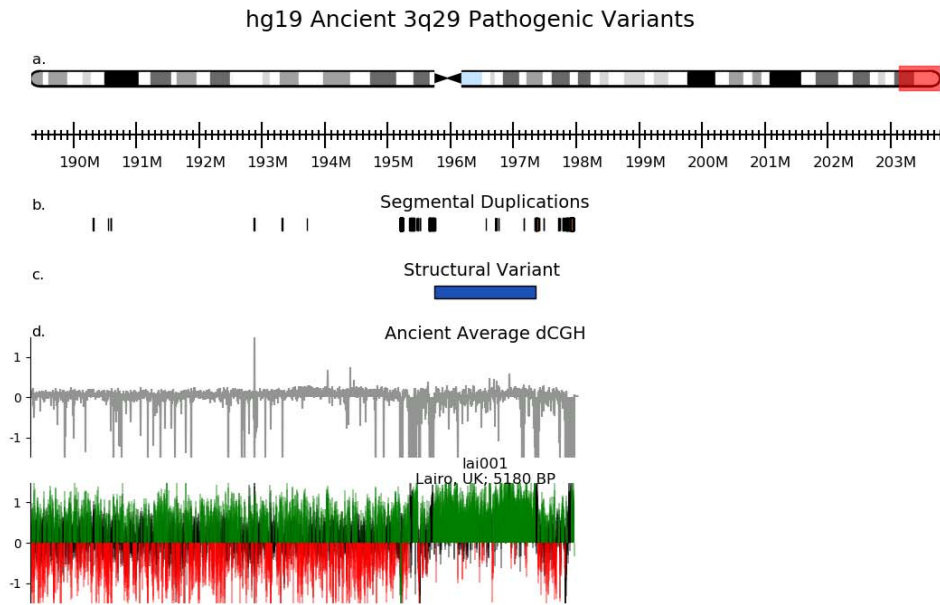

5573  
 5574 **Figure S4i.2. Microduplication of an ancient individual at the 3q29 locus from the hg19**  
 5575 **BAM dataset.** At 3q29, microdeletions and microduplications are associated with speech  
 5576 and developmental delay, cleft palate, microcephaly, and increased risk for psychiatric  
 5577 disorders<sup>19,20</sup>. No modern individuals in the SGDP or HGDP datasets present with a  
 5578 microdeletion or microduplication at 3q29.  
 5579  
 5580  
 5581  
 5582  
 5583

hg38 Ancient 3q29 Pathogenic Variants

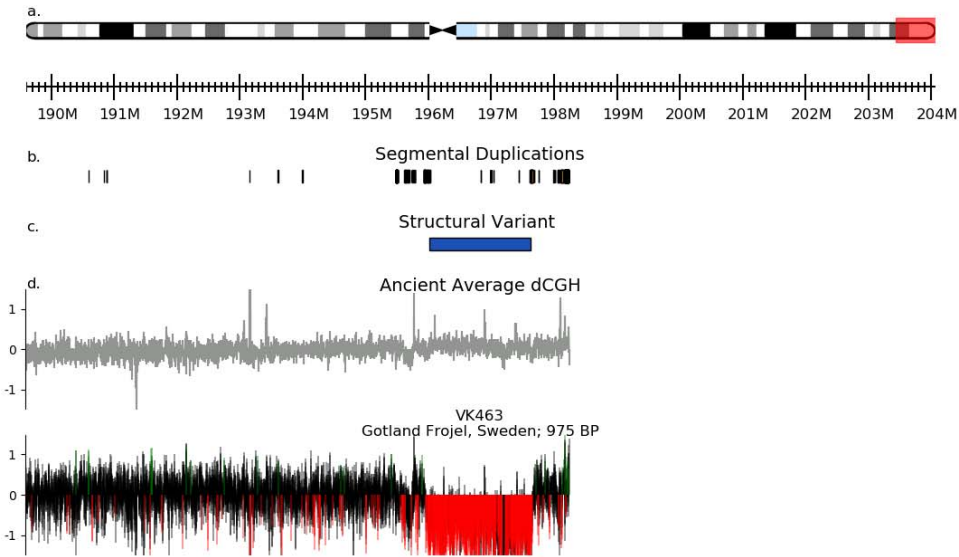

5584  
5585  
5586

**Figure S4i.3.** Microdeletion of an ancient individual at the 3q29 locus from the hg38 fastq dataset.



hg19 Ancient 15q11.2 Pathogenic Variants

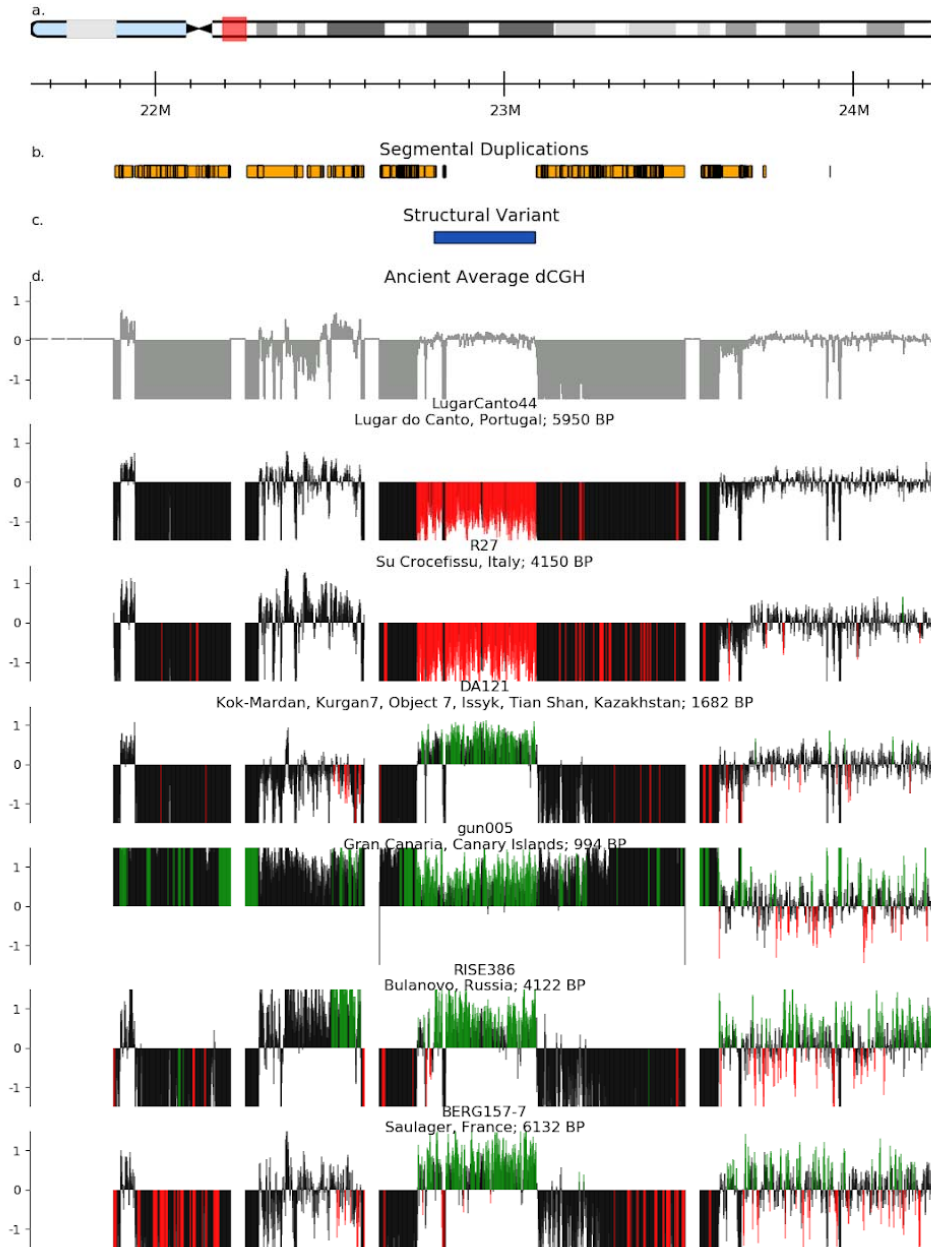

5587  
 5588  
 5589  
 5590  
 5591  
 5592  
 5593  
 5594

**Figure S4i.4.** Two microdeletions and four microduplications are present at the 15q11.2 locus from the hg19 BAM dataset. Although the microdeletion is considered to confer modest risk of schizophrenia, epilepsy, learning problems, and ADHD, the microduplication is largely considered to be benign<sup>21-24</sup>. The blocks flanking the structural variant with copy number 0 are where duplicated reads have been filtered from the dataset.

hg38 Ancient 15q11.2 Pathogenic Variants

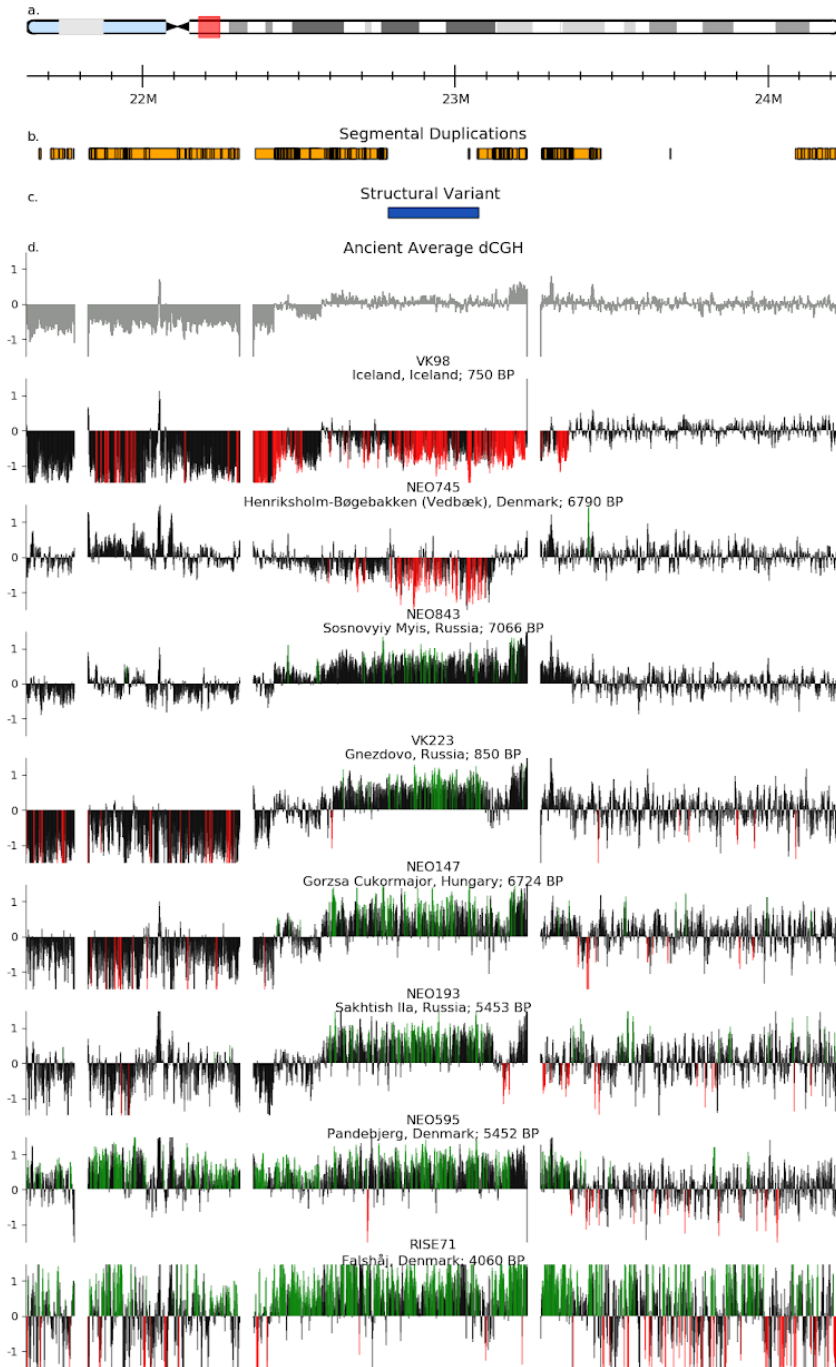

5595  
5596  
5597  
5598

Figure S4i.5. Two microdeletions and six microduplications are present at the 15q11.2 locus from the hg38 fastq dataset.

hg38 Modern 15q11.2 Pathogenic Variants

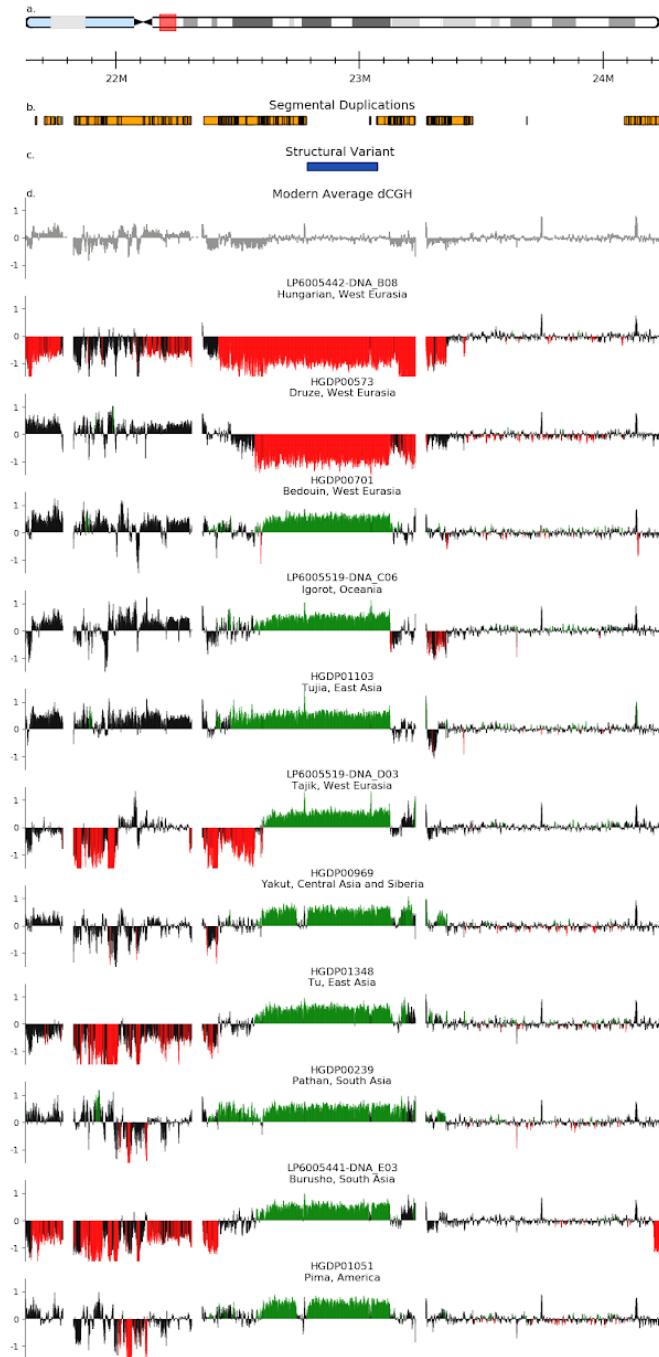

5599  
5600  
5601  
5602  
5603

**Figure S4i.6.** Two microdeletions and nine microduplications are present at the 15q11.2 locus from the modern human dataset. There are perhaps two duplications present – a long (HGDP01103 and HGDP00239) and a short (the other six humans).

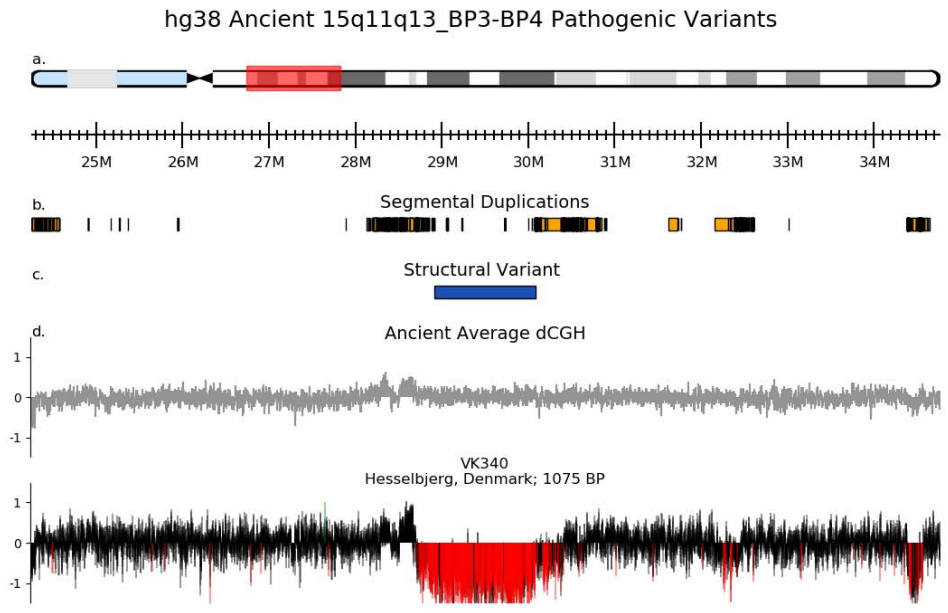

5604  
 5605 **Figure S4i.7. Microdeletion of an ancient individual at the 15q11q13 (breakpoints BP3-**  
 5606 **BP4) locus from the hg38 fastq dataset.** Although the BP3-BP4 microdeletion at  
 5607 15q11q13 has not been formally associated with disease, carriers have been reported with  
 5608 short stature, microcephaly, hypotonia, and facial dysmorphia <sup>25</sup>. None of the studied  
 5609 modern individuals have the deletion.

5610  
 5611  
 5612  
 5613  
 5614  
 5615  
 5616  
 5617  
 5618  
 5619  
 5620  
 5621  
 5622  
 5623  
 5624  
 5625  
 5626  
 5627  
 5628  
 5629  
 5630  
 5631

### hg19 Ancient 15q13.3\_smaller Pathogenic Variants

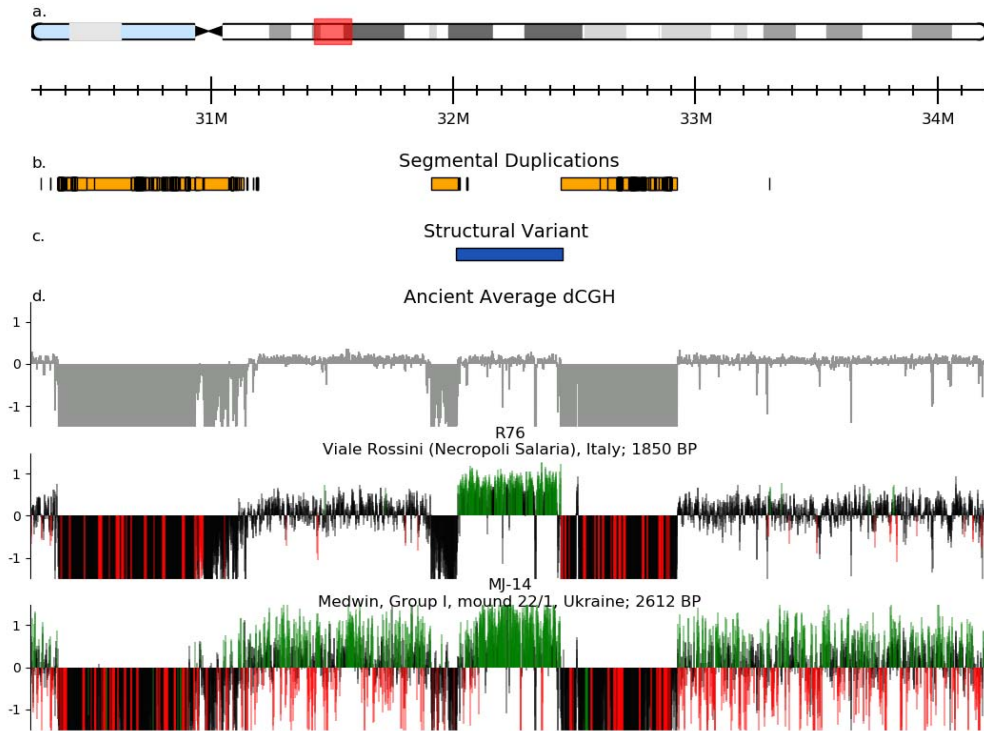

5632  
5633  
5634  
5635  
5636  
5637  
5638  
5639  
5640  
5641  
5642  
5643  
5644  
5645  
5646  
5647  
5648  
5649  
5650  
5651  
5652  
5653  
5654  
5655  
5656  
5657

**Figure S4i.8.** Two microduplications are present at the 15q13.3 (*CHRNA7*) locus from the hg19 BAM dataset. The *CHRNA7* microdeletion has been associated with developmental delay and psychiatric disorders, but it is less clear which (if any) phenotypes are associated with the *CHRNA7* microduplication and there is evidence that *CHRNA7* duplication carriers have just as good cognitive function as others <sup>26</sup>.

### hg38 Ancient 15q13.3\_smaller Pathogenic Variants

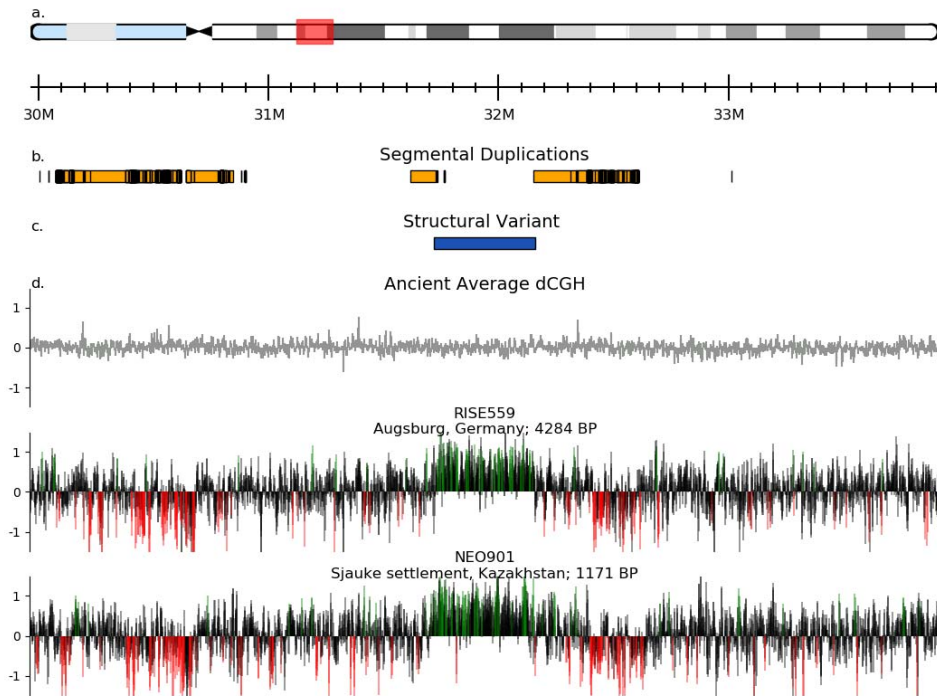

5658  
5659  
5660  
5661  
5662  
5663  
5664  
5665  
5666  
5667  
5668  
5669  
5670  
5671  
5672  
5673  
5674  
5675  
5676  
5677  
5678

**Figure S4i.9.** Two microduplications are present at the 15q13.3 (*CHRNA7*) locus from the hg38 fastq dataset.

hg38 Modern 15q13.3\_smaller Pathogenic Variants

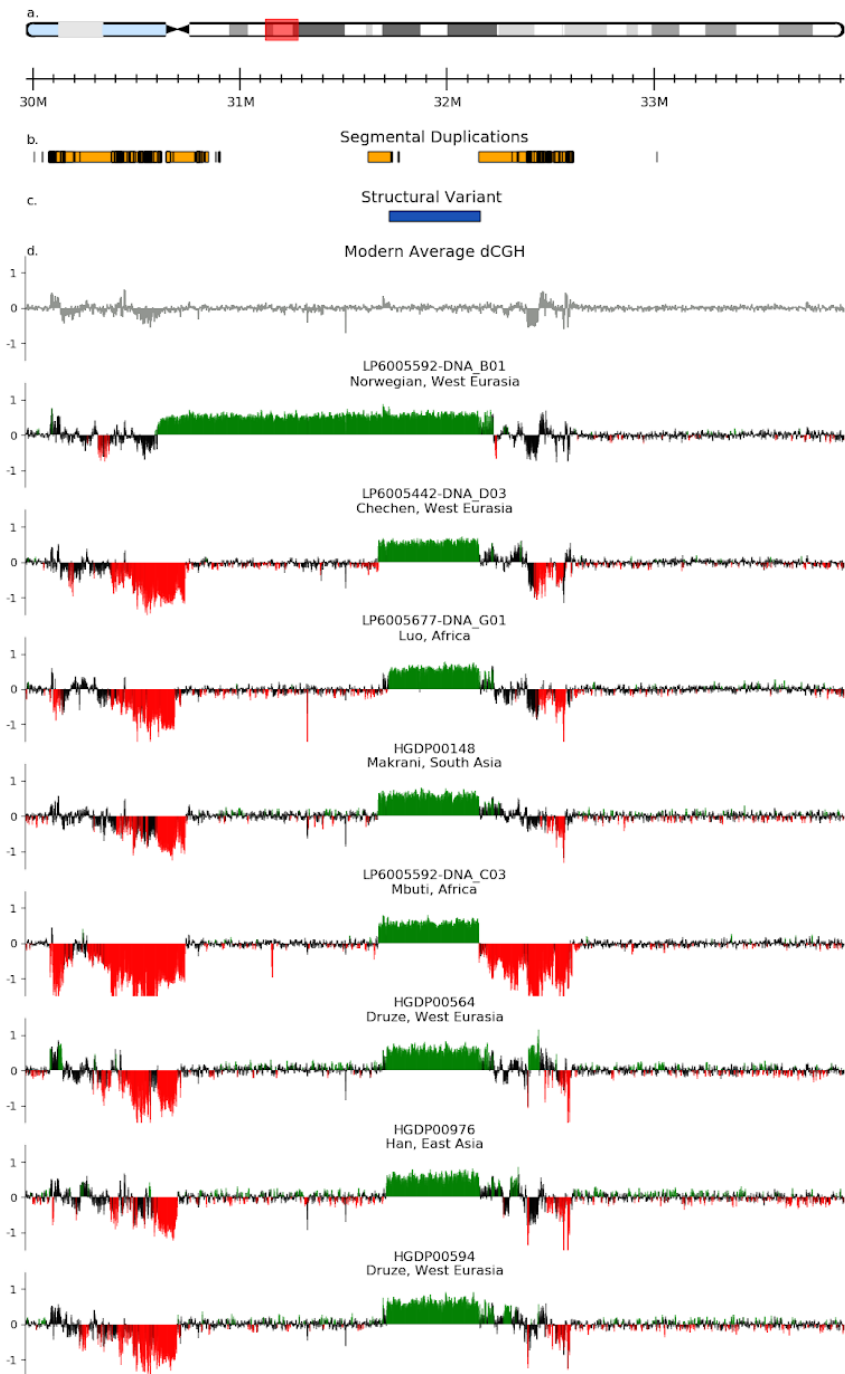

5679  
5680  
5681  
5682

Figure S4i.10. Two different microduplications are present at the 15q13.3 (*CHRNA7*) locus from the modern human dataset.

### hg19 Ancient 16p12.1 Pathogenic Variants

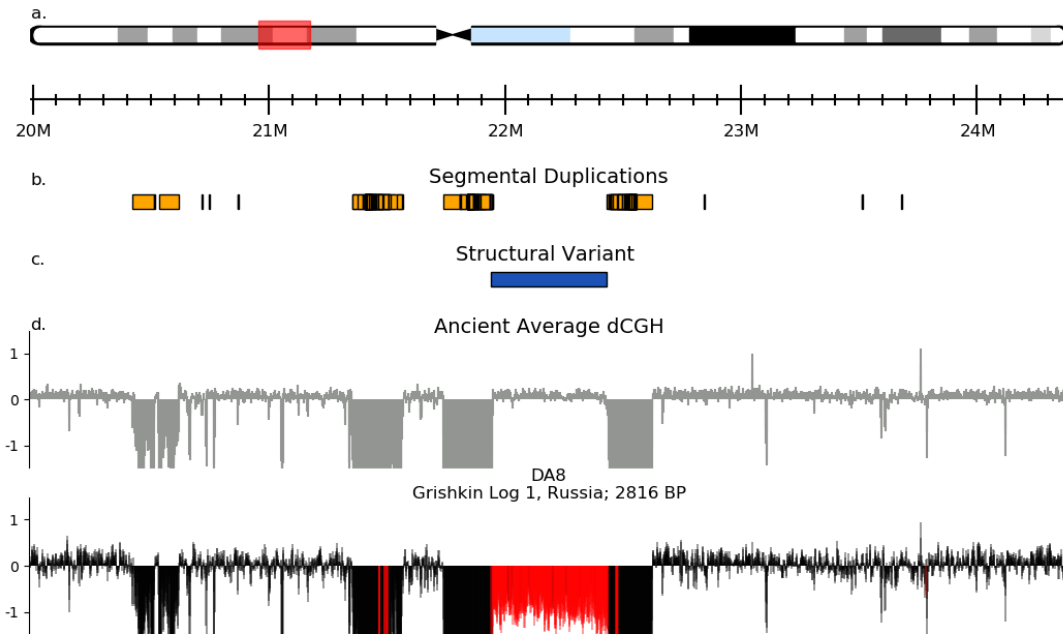

5683  
5684  
5685  
5686  
5687  
5688  
5689  
5690  
5691  
5692  
5693  
5694  
5695  
5696  
5697  
5698  
5699  
5700  
5701  
5702  
5703  
5704  
5705  
5706  
5707  
5708  
5709  
5710  
5711

**Figure S4i.11.** One ancient individual from the hg19 BAM dataset has a deletion at the **16p12.1 locus**. At this locus, microdeletions and microduplications are associated with developmental delay, cognitive impairment, growth impairment, cardiac malformations, epilepsy, and psychiatric and behavioural problems <sup>27,28</sup>.



### hg38 Ancient 16p12.1 Pathogenic Variants

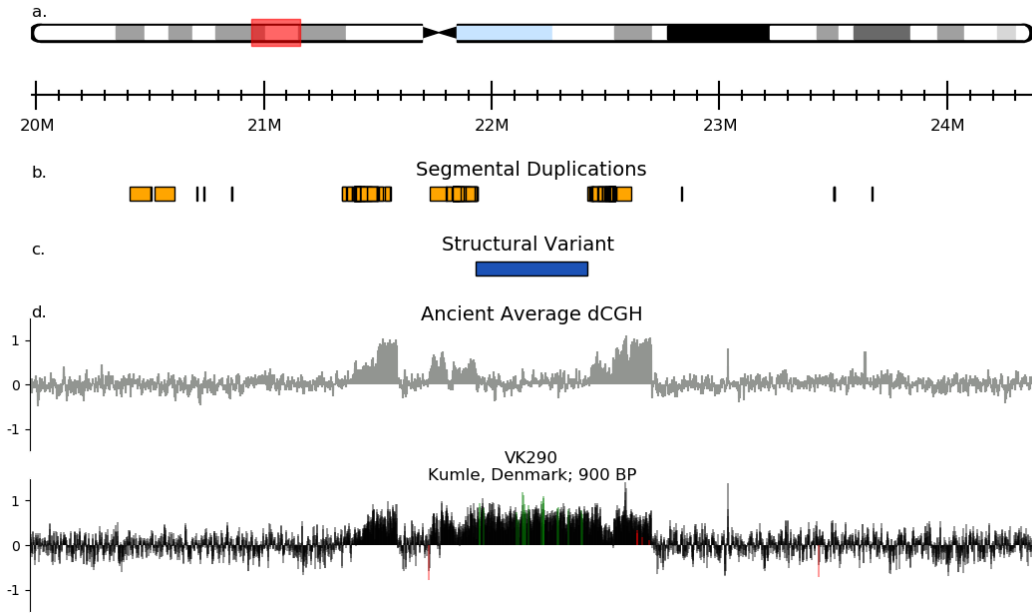

5712  
5713  
5714

**Figure S4i.12.** One ancient individual from the hg38 fastq dataset has a duplication at the 16p12.1 locus.

## hg19 Ancient 16p13.11 Pathogenic Variants

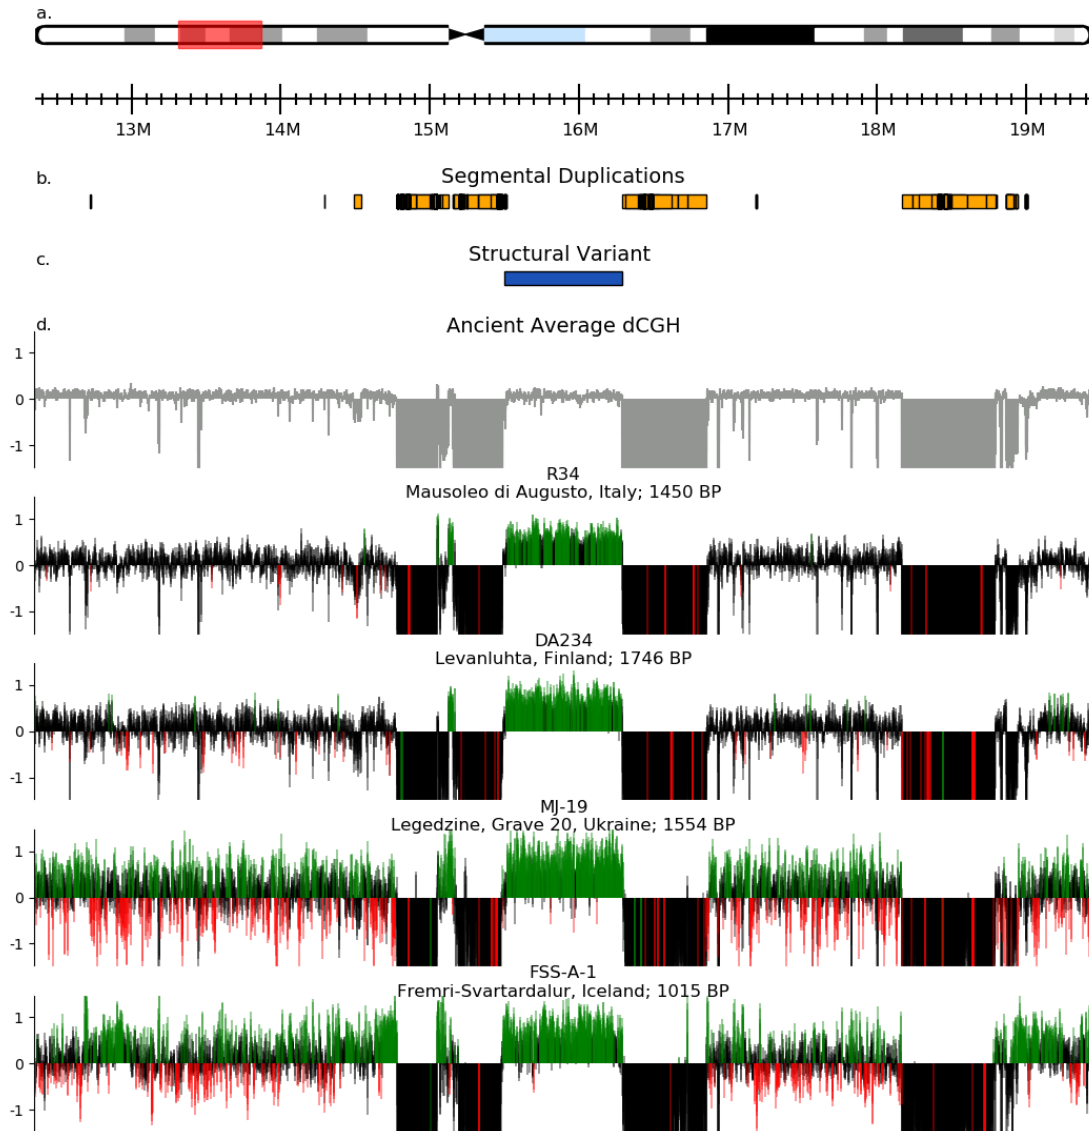

5715  
5716  
5717  
5718  
5719

**Figure S4i.13.** Four microduplications are present at the 16q13.11 locus from the hg19 BAM dataset. At the 16p13.11 locus, microduplications and microdeletions have been associated with several phenotypes including behavioral abnormalities, developmental delay, congenital heart defects, and skeletal abnormalities<sup>29,30</sup>.

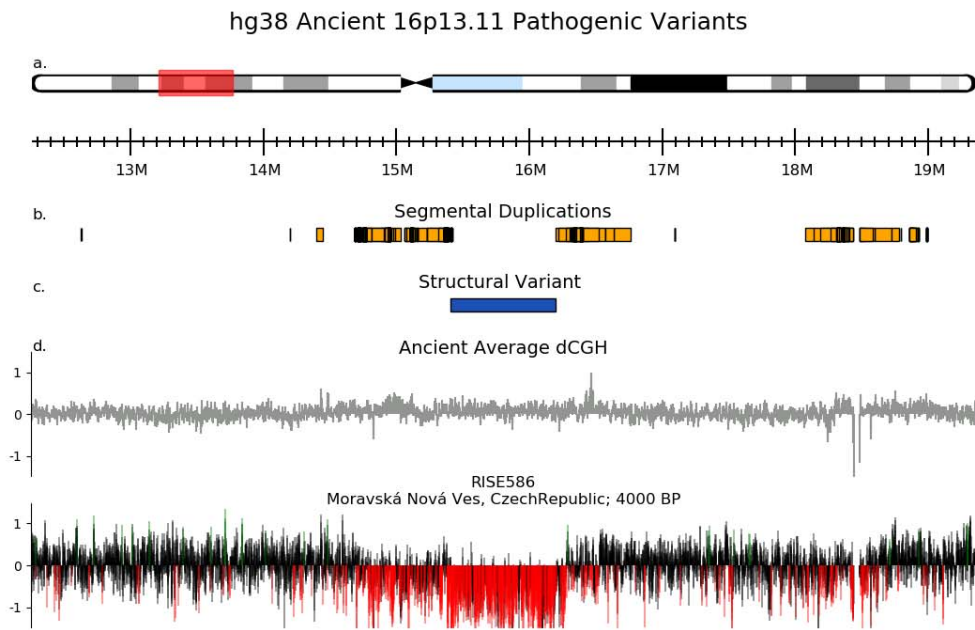

5720  
5721  
5722

**Figure S4i.14.** One microdeletion is present at the 16q13.11 locus from the hg38 fastq dataset.

# hg19 Ancient 15q11.2 Pathogenic Variants

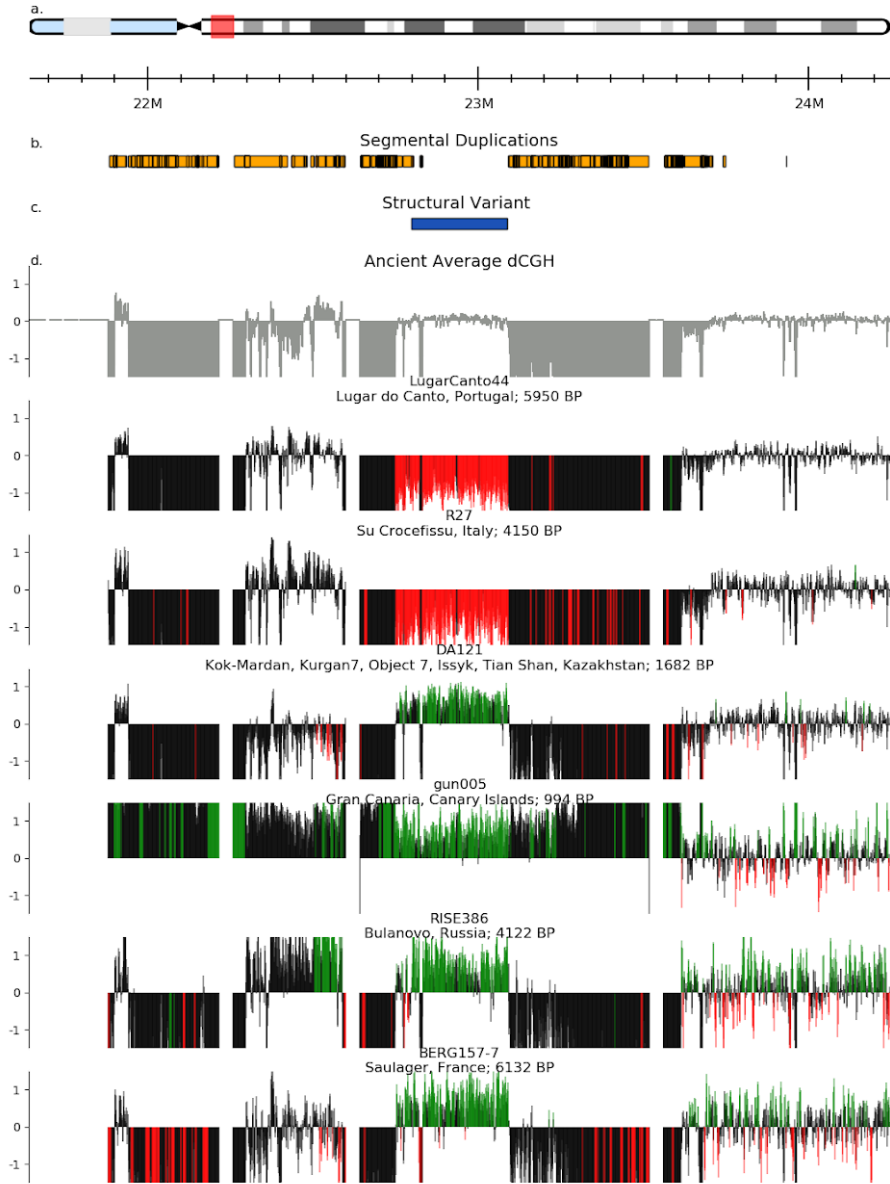

hg19 Ancient 22q11.2\_distal Pathogenic Variants

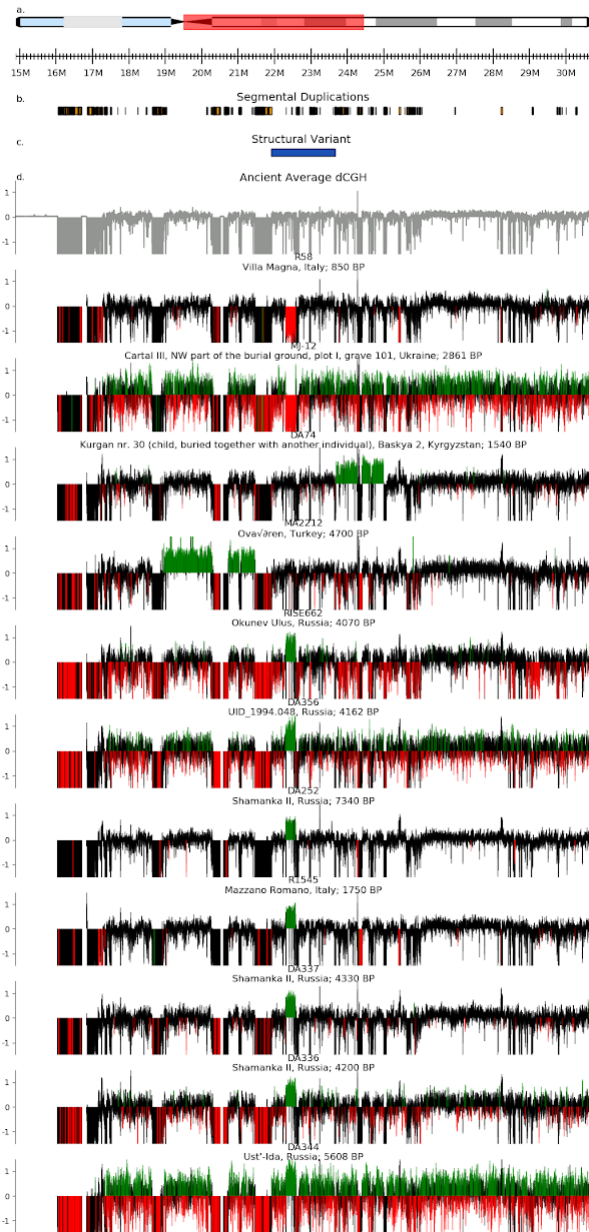

5724  
5725  
5726  
5727  
5728  
5729  
5730  
5731  
5732  
5733

**Figure S4i.15.** Two microdeletions and nine microduplications are present at the 22q11.2 (distal) locus from the hg19 BAM dataset. At the 22q11.2 locus, the *TOP3B* microdeletion has been reported to be associated with autism, learning disabilities, and dysmorphic features<sup>31,32</sup>, and *TOP3B* knockout mice exhibit behaviour similar to psychiatric disorders and cognitive impairment<sup>33</sup>, but risk estimates from large-scale population-based studies are lacking. All hg19 ancient individuals have this *TOP3B* structural variant with identical breakpoints as a 12-year-old patient with autism, cognitive impairment, and dysmorphic features<sup>34</sup> (Figure S4), while two other ancient individuals have other duplication breakpoints (DA74 and MA2212).

hg38 Ancient 22q11.2\_distal Pathogenic Variants

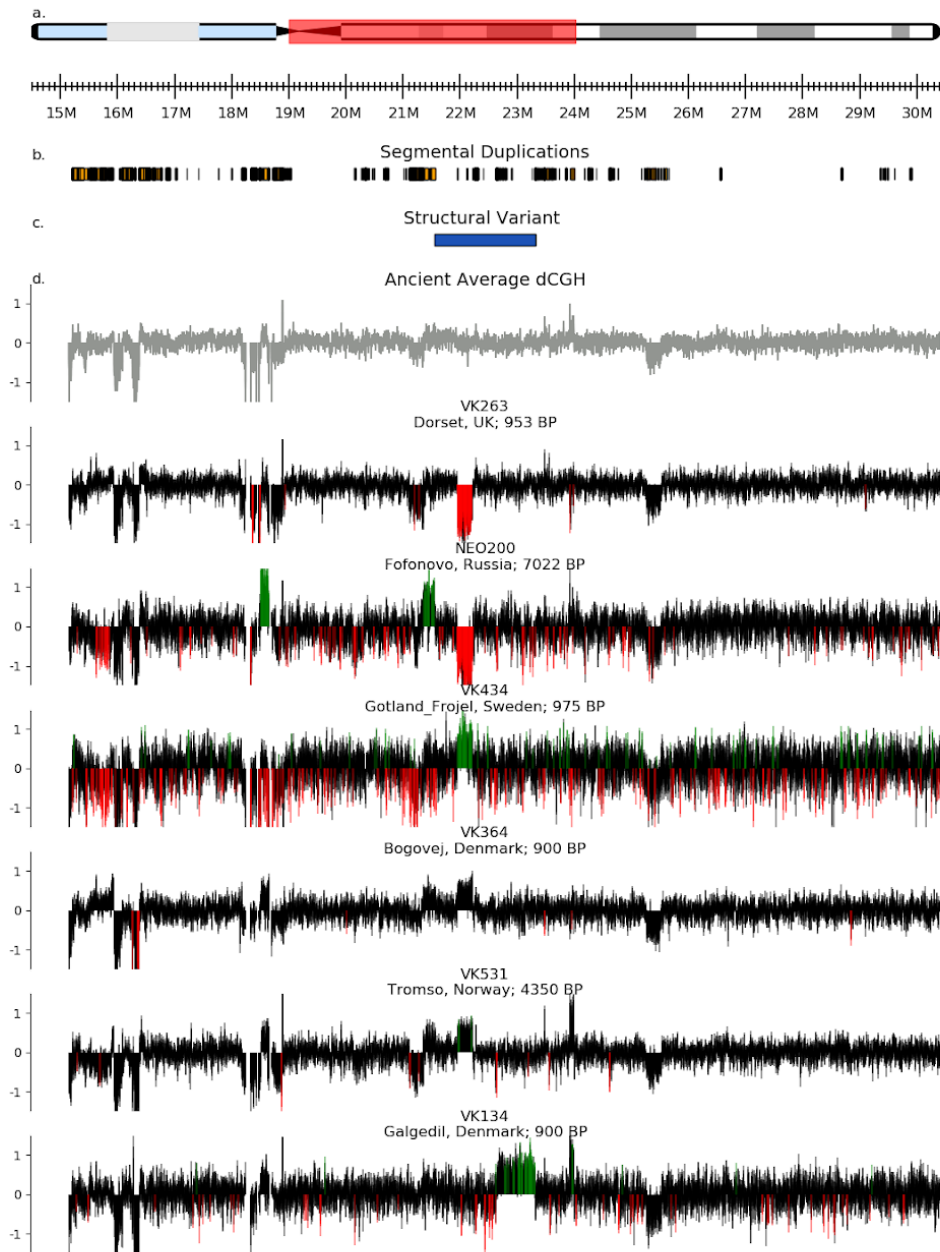

5734  
5735  
5736  
5737  
5738

Figure S4i.16. Two microdeletions and four microduplications are present at the 22q11.2 (distal) locus from the hg19 BAM dataset.

hg38 Modern 22q11.2\_distal Pathogenic Variants

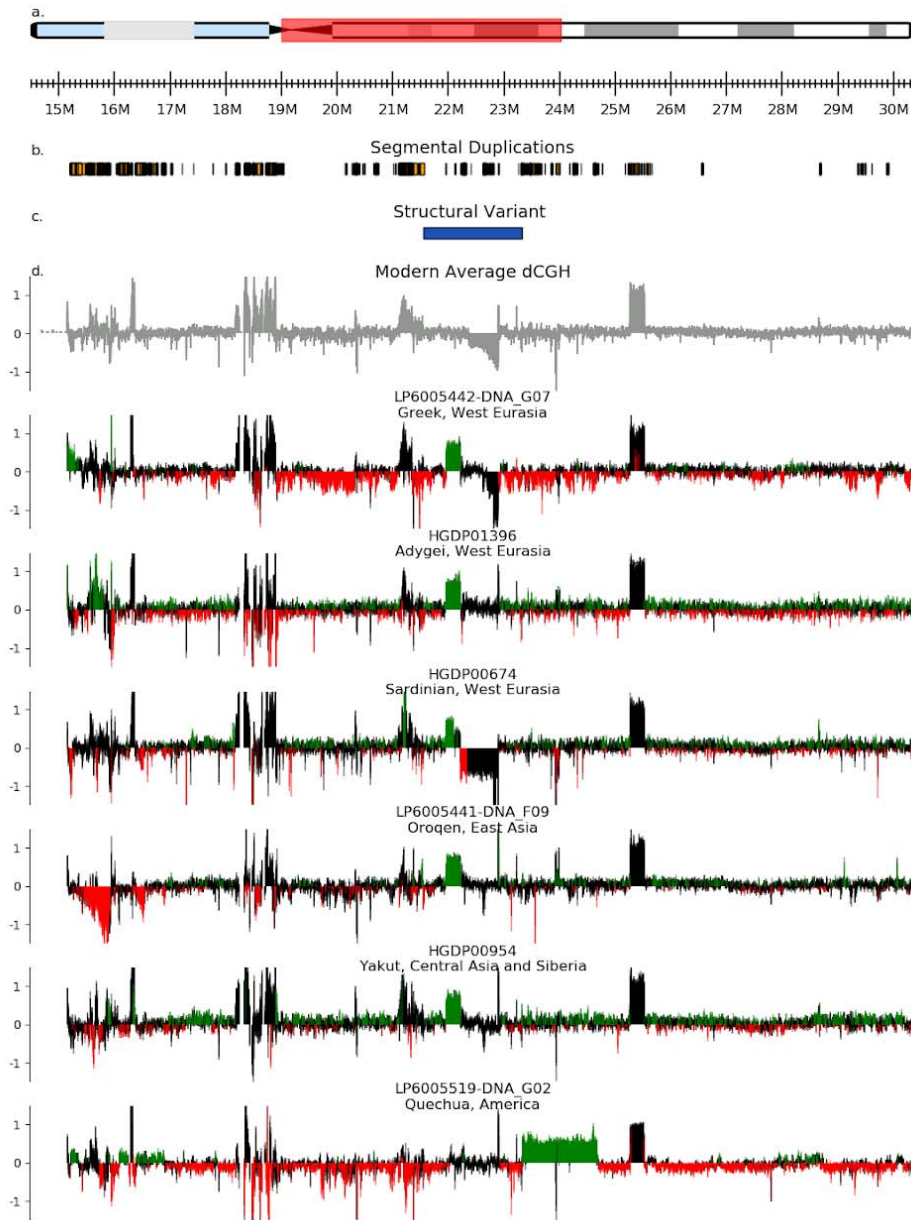

5739  
5740  
5741  
5742

Figure S4i.17. Six microduplications (five of which directly overlap with *TOP3B*) are present at the 22q11.2 (distal) locus from the modern human dataset.

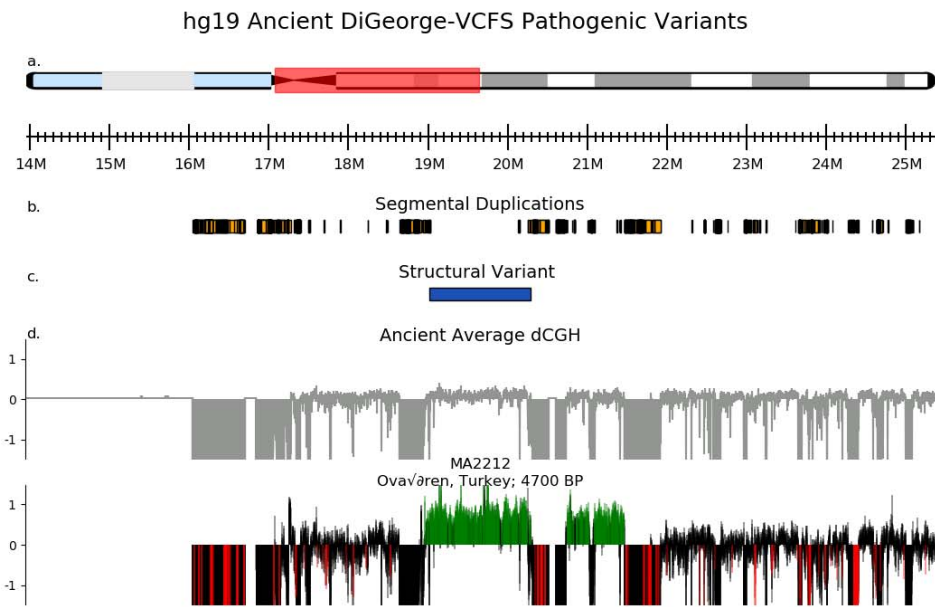

5743  
 5744  
 5745  
 5746  
 5747  
 5748  
 5749  
 5750

**Figure S4i.18.** One ancient individual has a duplication at the DiGeorge-VCFS locus from the hg19 BAM dataset. Duplications at this locus are associated with schizophrenia as well as cardiovascular, parathyroid, thymic, and craniofacial abnormalities<sup>35</sup>.



hg19 Ancient TAR Pathogenic Variants

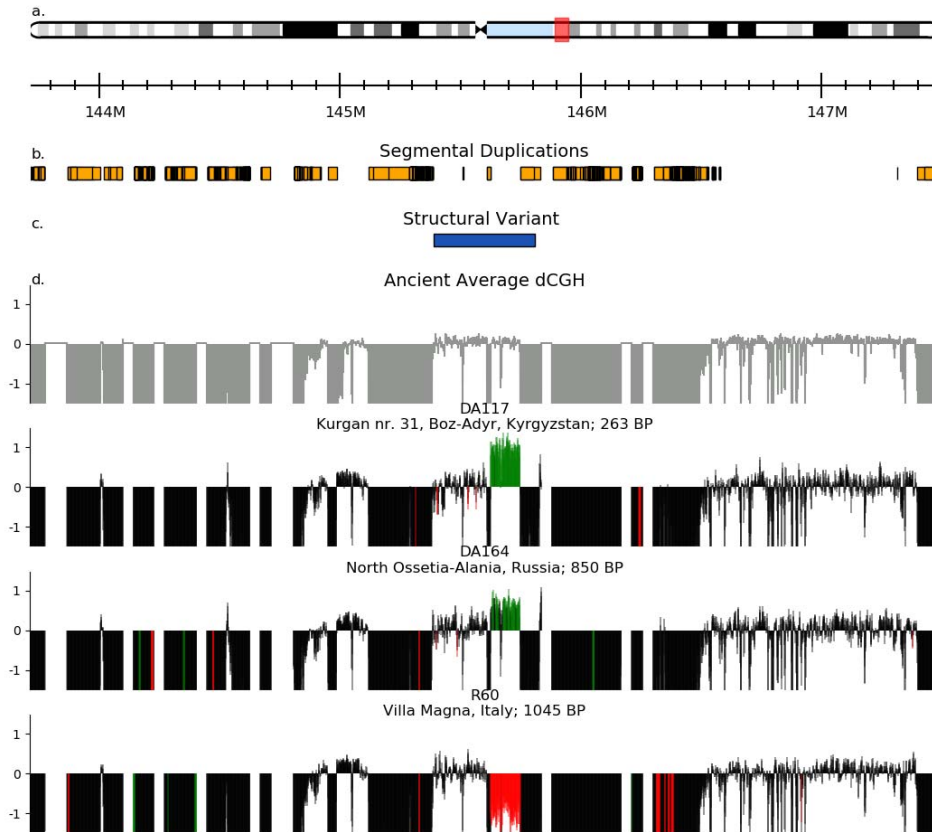

5751  
5752  
5753  
5754  
5755  
5756  
5757

**Figure S4i.19. Ancient TAR pathogenic variants.** TAR (thrombocytopenia with absent radius) syndrome is a rare genetic disorder featuring the absence of the radius bone in the forearm<sup>36</sup>; while no ancient individuals have a structural variant across the entire breakpoint of the syndrome, one ancient individual has a deletion across part of the locus and two ancient individuals have a duplication across the same breakpoints. The possible pathological implication of these CNVs is therefore unknown.

### hg38 Modern TAR Pathogenic Variants

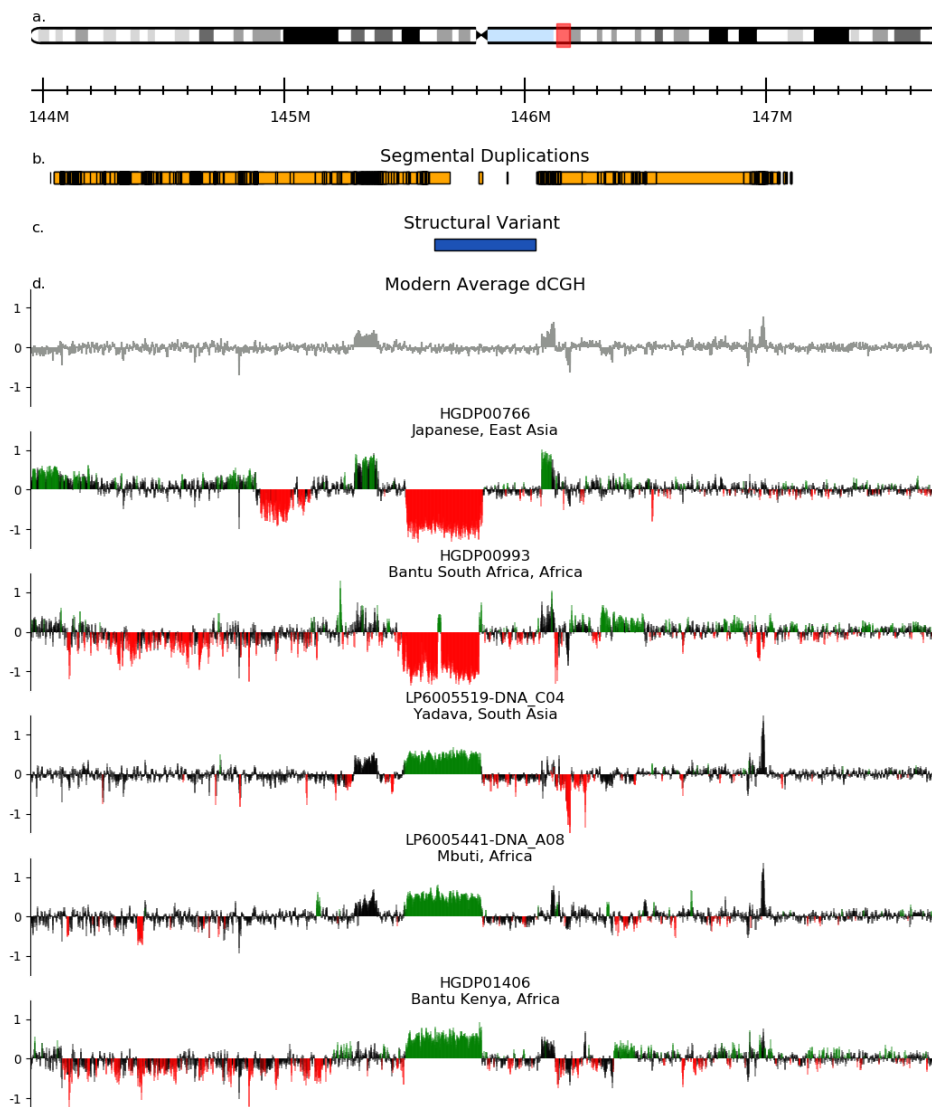

5758  
5759  
5760  
5761

**Figure S4i.20.** Two deletions and three duplications are present in the modern human dataset, but with different breakpoints than the ancient human structural variants.

### 5762 References

- 5763 1. Girirajan, S., Campbell, C. D. & Eichler, E. E. Human copy number variation and  
5764 complex genetic disease. *Annu. Rev. Genet.* **45**, 203–226 (2011).
- 5765 2. Weise, A. *et al.* Microdeletion and microduplication syndromes. *J. Histochem.*  
5766 *Cytochem.* **60**, 346–358 (2012).
- 5767 3. Girirajan, S. *et al.* Phenotypic heterogeneity of genomic disorders and rare copy-

- 5768 number variants. *N. Engl. J. Med.* **367**, 1321–1331 (2012).
- 5769 4. Bergström, A. *et al.* Insights into human genetic variation and population history from  
5770 929 diverse genomes. *Science* **367**, (2020).
- 5771 5. Mallick, S. *et al.* The Simons Genome Diversity Project: 300 genomes from 142  
5772 diverse populations. *Nature* **538**, 201–206 (2016).
- 5773 6. Li, H. Burrows-Wheeler Aligner. <http://bio-bwa.sourceforge.net/>.
- 5774 7. Miles, A. *pysamstats: A fast Python and command-line utility for extracting simple*  
5775 *statistics against genome positions based on sequence alignments from a SAM or BAM*  
5776 *file.* (Github).
- 5777 8. Benson, G. Tandem repeats finder: a program to analyze DNA sequences. *Nucleic*  
5778 *Acids Res.* **27**, 573–580 (1999).
- 5779 9. Sudmant, P. H. *et al.* Evolution and diversity of copy number variation in the great  
5780 ape lineage. *Genome Res.* **23**, 1373–1382 (2013).
- 5781 10. Leffler, E. M. *et al.* Resistance to malaria through structural variation of red  
5782 blood cell invasion receptors. *Science* **356**, (2017).
- 5783 11. Sudmant, P. H. *et al.* Diversity of human copy number variation and multicopy  
5784 genes. *Science* **330**, 641–646 (2010).
- 5785 12. Crawford, K. *et al.* Medical consequences of pathogenic CNVs in adults:  
5786 analysis of the UK Biobank. *J. Med. Genet.* **56**, 131–138 (2019).
- 5787 13. Olsen, L. *et al.* Prevalence of rearrangements in the 22q11. 2 region and  
5788 population-based risk of neuropsychiatric and developmental disorders in a Danish  
5789 population: a case-cohort study. *The Lancet Psychiatry* **5**, 573–580 (2018).
- 5790 14. Dolcetti, A. *et al.* 1q21.1 Microduplication expression in adults. *Genet. Med.*  
5791 **15**, 282–289 (2013).
- 5792 15. Mefford, H. C. *et al.* Recurrent rearrangements of chromosome 1q21.1 and  
5793 variable pediatric phenotypes. *N. Engl. J. Med.* **359**, 1685–1699 (2008).
- 5794 16. Brunetti-Pierri, N. *et al.* Recurrent reciprocal 1q21.1 deletions and  
5795 duplications associated with microcephaly or macrocephaly and developmental and

- 5796 behavioral abnormalities. *Nat. Genet.* **40**, 1466–1471 (2008).
- 5797 17. Bailey, J. A. *et al.* Recent segmental duplications in the human genome.  
5798 *Science* **297**, 1003–1007 (2002).
- 5799 18. Kent, W. J. *et al.* The human genome browser at UCSC. *Genome Res.* **12**,  
5800 996–1006 (2002).
- 5801 19. Coyan, A. G. & Dyer, L. M. 3q29 microduplication syndrome: Clinical and  
5802 molecular description of eleven new cases. *Eur. J. Med. Genet.* **63**, 104083 (2020).
- 5803 20. Glassford, M. R., Rosenfeld, J. A., Freedman, A. A., Zwick, M. E. & Mulle, J.  
5804 G. Novel features of 3q29 deletion syndrome: Results from the 3q29 registry. *Am. J.*  
5805 *Med. Genet. A* **170**, 999–1006 (2016).
- 5806 21. Stefansson, H. *et al.* CNVs conferring risk of autism or schizophrenia affect  
5807 cognition in controls. *Nature* **505**, 361–366 (2014).
- 5808 22. Kirov, G. *et al.* The penetrance of copy number variations for schizophrenia  
5809 and developmental delay. *Biol. Psychiatry* **75**, 378–385 (2014).
- 5810 23. Gudmundsson, O. O. *et al.* Attention-deficit hyperactivity disorder shares copy  
5811 number variant risk with schizophrenia and autism spectrum disorder. *Transl.*  
5812 *Psychiatry* **9**, 258 (2019).
- 5813 24. Jønych, A. E. *et al.* Estimating the effect size of the 15Q11.2 BP1–BP2  
5814 deletion and its contribution to neurodevelopmental symptoms: recommendations for  
5815 practice. *J. Med. Genet.* **56**, 701–710 (2019).
- 5816 25. Rosenfeld, J. A. *et al.* Deletions flanked by breakpoints 3 and 4 on 15q13 may  
5817 contribute to abnormal phenotypes. *Eur. J. Hum. Genet.* **19**, 547–554 (2011).
- 5818 26. Kendall, K. M. *et al.* Cognitive performance and functional outcomes of  
5819 carriers of pathogenic copy number variants: analysis of the UK Biobank. *Br. J.*  
5820 *Psychiatry* **214**, 297–304 (2019).
- 5821 27. Girirajan, S., Pizzo, L., Moeschler, J. & Rosenfeld, J. *16p12.2 Recurrent*  
5822 *Deletion*. (University of Washington, 1993).
- 5823 28. D’Angelo, D. *et al.* Defining the Effect of the 16p11.2 Duplication on

- 5824 Cognition, Behavior, and Medical Comorbidities. *JAMA Psychiatry* **73**, 20–30 (2016).
- 5825 29. Nagamani, S. C. S. *et al.* Phenotypic manifestations of copy number variation  
5826 in chromosome 16p13.11. *Eur. J. Hum. Genet.* **19**, 280–286 (2011).
- 5827 30. Allach El Khattabi, L. *et al.* 16p13.11 microduplication in 45 new patients:  
5828 refined clinical significance and genotype-phenotype correlations. *J. Med. Genet.* **57**,  
5829 301–307 (2020).
- 5830 31. Stoll, G. *et al.* Deletion of TOP3 $\beta$ , a component of FMRP-containing mRNPs,  
5831 contributes to neurodevelopmental disorders. *Nat. Neurosci.* **16**, 1228–1237 (2013).
- 5832 32. Ahmad, M. *et al.* Topoisomerase 3 $\beta$  is the major topoisomerase for mRNAs  
5833 and linked to neurodevelopment and mental dysfunction. *Nucleic Acids Res.* **45**, 2704–  
5834 2713 (2017).
- 5835 33. Joo, Y. *et al.* Topoisomerase 3 $\beta$  knockout mice show transcriptional and  
5836 behavioural impairments associated with neurogenesis and synaptic plasticity. *Nat.*  
5837 *Commun.* **11**, 3143 (2020).
- 5838 34. Kaufman, C. S., Genovese, A. & Butler, M. G. Deletion of TOP3B Is  
5839 Associated with Cognitive Impairment and Facial Dysmorphism. *Cytogenet. Genome*  
5840 *Res.* **150**, 106–111 (2016).
- 5841 35. Agatsuma, S. & Hiroi, N. Chromosome 22q11 and schizophrenia. *Nihon*  
5842 *Shinkei Seishin Yakurigaku Zasshi* **25**, 79–84 (2005).
- 5843 36. Boussion, S. *et al.* TAR syndrome: Clinical and molecular characterization of  
5844 a cohort of 26 patients and description of novel noncoding variants of RBM8A. *Hum.*  
5845 *Mutat.* **41**, 1220–1225 (2020).

5846  
5847

5848  
5849  
5850  
5851

5852

5853

5854
