# Supplementary material for: Population genomics of postglacial western eurasia
Source: bioRxiv or medRxiv preprint supplement (doi:10.1101/2022.05.04.490594), 2023-12-21

A

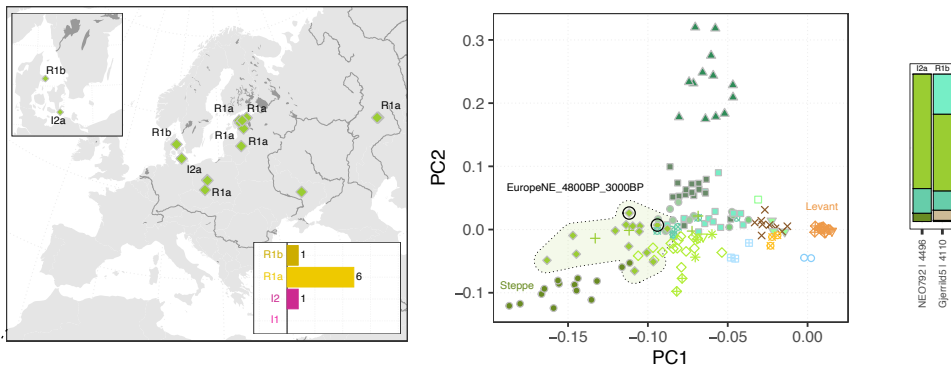

B

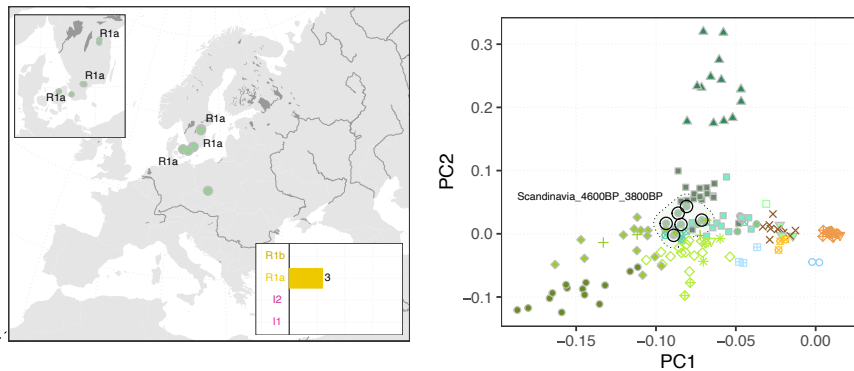

C

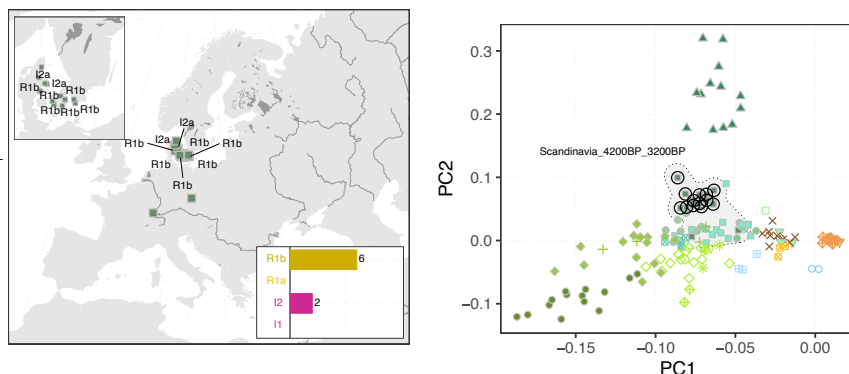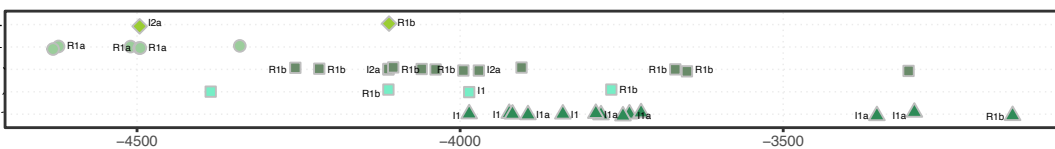

Source

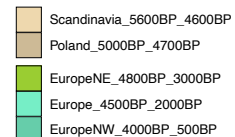

D

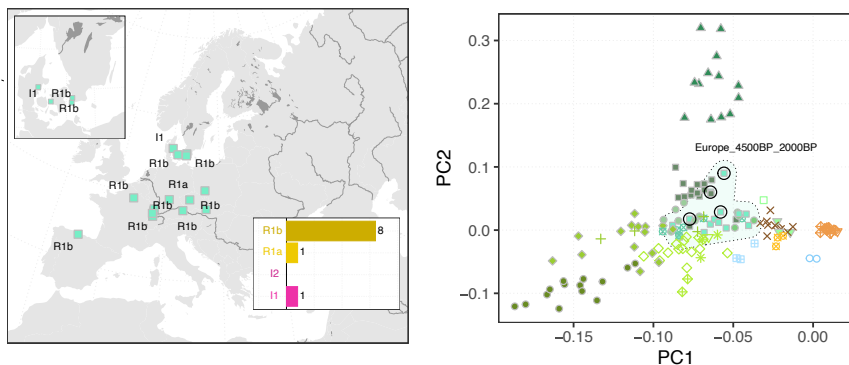

E

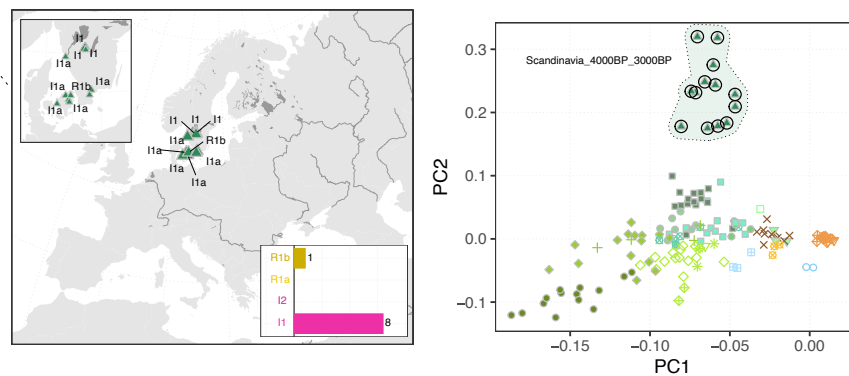

Supplement: Supplementary file [file media-8.pdf]
